# Supplementary material for: Transcriptional drifts associated with environmental changes in endothelial cells
Source: eLife. 2023 Mar 27;12:e81370. doi: 10.7554/eLife.81370 (PMC10168696; doi:10.7554/eLife.81370)
Supplement: Supplementary file 1. [file elife-81370-supp1.xlsx]

## Sheet: normalized all counts
		CORD							EARLY CULTURE (P2-P3)							LATE CULTURE (P7-P8)
		1C	2C	3C	4C	5C	6C	7C	1E	3E	4E	2E	6E	5E	7E	2L	3L	4L	2L	6L	5L	7L
ENSG00000210082	MT-RNR2	14.3863	12.7992	14.6905	14.5191	14.2689	13.9951	13.7448	13.283	13.8004	13.6803	12.918	13.8303	12.8821	13.1959	13.2295	13.2134	13.3119	12.7703	13.546	13.1843	12.9016
ENSG00000211459	MT-RNR1	13.6139	10.1061	12.8853	12.2971	12.7087	12.0251	11.7661	11.7949	11.5534	11.2302	11.1097	12.4852	10.0148	11.2625	11.2604	11.8123	10.6415	9.60519	10.0157	10.3847	9.35793
ENSG00000115414	FN1	11.9378	11.2741	11.4188	11.9134	11.9188	11.2113	11.5842	10.2145	10.2954	9.7781	9.99298	9.92885	10.5161	10.9642	10.8185	9.69767	9.81535	10.2628	9.25905	10.5787	10.0936
ENSG00000274012	RN7SL2	11.8775	13.6988	11.233	12.2192	12.1852	11.6381	11.9223	10.6253	10.7053	10.3211	10.4499	9.80912	10.725	10.1378	10.1519	11.1336	10.8475	10.5049	11.127	11.4124	11.6639
ENSG00000142798	HSPG2	11.7558	10.3717	10.5409	10.9113	11.3159	11.0948	11.1994	9.85957	9.951	9.55829	8.7942	9.14609	8.99164	9.25686	10.1304	9.95653	10.5683	10.5601	10.4626	9.55906	8.78653
ENSG00000110799	VWF	11.7119	11.3105	11.9234	12.0314	12.0661	11.568	12.1597	8.17309	8.13216	8.32375	7.90687	6.9905	6.99422	7.94009	8.47159	8.07965	9.3524	9.44904	8.79144	7.83971	8.19212
ENSG00000049540	ELN	10.5348	9.37603	10.592	10.5424	10.8106	10.3868	11.3293	-0.0344223	0.392741	1.15963	2.33746	2.5858	1.66718	0.790699	-0.622526	-0.130881	-1.15213	-1.63689	-1.20194	0.994258	-0.462655
ENSG00000251562	MALAT1	10.4202	8.48666	11.4763	9.303	9.81848	9.61255	9.53927	8.46404	8.47111	8.05339	8.69519	8.98212	7.95878	8.66612	8.63284	9.10905	8.03994	8.16075	8.1075	8.0527	7.60727
ENSG00000120885	CLU	9.92953	10.2226	10.4462	11.529	9.62223	10.2187	10.6381	3.95855	3.75611	6.11049	6.65878	6.06769	4.50744	4.70071	5.16942	5.27271	4.74527	4.57332	5.86867	3.48284	3.51254
ENSG00000119681	LTBP2	9.88008	8.84918	9.29236	10.3511	10.3973	7.79364	9.96864	7.32691	7.10038	6.90134	6.136	5.04991	6.69321	7.10768	6.96817	6.45003	7.14326	7.06719	6.63457	7.39515	6.96036
ENSG00000115380	EFEMP1	9.66887	10.2065	9.74883	10.0004	9.46358	9.62675	10.0555	8.42052	8.57177	8.42427	8.8726	8.56047	8.61728	8.30306	8.88354	8.51131	8.78608	8.98868	9.03221	8.72328	8.58885
ENSG00000106366	SERPINE1	9.65391	11.1136	10.5759	10.2222	8.44974	9.45624	10.046	9.47648	9.28268	9.07216	9.73229	9.92191	10.0247	10.1804	9.73865	8.96341	9.86822	9.88466	8.78628	10.1028	9.65216
ENSG00000111341	MGP	9.62435	10.119	9.50169	10.0303	8.92974	9.56788	9.47215	3.9623	3.39377	3.64516	5.56914	5.77716	5.35166	4.55583	5.35146	5.1434	3.20898	4.77602	4.76798	3.70667	3.2034
ENSG00000198959	TGM2	9.49759	8.80022	9.36883	9.6058	8.96747	9.08094	9.05376	8.18256	7.88903	7.51484	7.56536	8.13521	7.89817	7.46814	8.13208	8.10073	8.1333	7.86194	8.12479	7.86679	7.1278
ENSG00000137801	THBS1	9.47841	9.2164	8.24304	8.63708	8.79295	8.4247	8.64032	10.7996	10.6713	10.1927	10.7611	10.5617	10.4096	10.9577	10.7006	10.5076	10.6462	10.764	10.3332	10.58	10.3576
ENSG00000168542	COL3A1	9.47129	10.4761	8.87727	9.01992	9.77062	9.83083	10.3791	2.24503	3.28249	3.95547	5.19642	4.85577	4.96003	3.81925	2.2455	1.23025	0.662155	1.28367	1.5212	3.31981	0.484622
ENSG00000113140	SPARC	9.44359	9.24449	8.59539	8.85939	9.20541	9.14652	9.71154	8.11272	7.69417	7.59782	7.63893	7.70235	7.53645	8.09257	8.7492	8.65117	8.036	8.31399	8.4803	8.0581	8.13432
ENSG00000137573	SULF1	9.42638	9.14387	10.0967	10.5431	9.62105	9.41293	10.3062	5.18027	5.32604	5.28012	7.40413	7.08216	7.41821	5.80589	3.91328	1.7685	2.02498	3.50942	3.88973	5.46057	2.8335
ENSG00000261371	PECAM1	9.39874	9.5922	9.33279	9.71653	8.96282	9.18011	9.1997	8.07077	7.44889	8.00027	7.4422	7.33143	7.02254	7.33204	8.599	8.28881	8.12804	8.27784	8.5123	7.59576	8.0002
ENSG00000170345	FOS	9.38453	8.84623	9.63811	8.52746	9.73631	9.08373	7.82085	-1.02697	-1.22558	-0.396932	-1.15203	0.727436	-1.61697	-1.16692	-2.20749	-1.36484	-0.807684	-0.826865	-1.01619	-1.14098	-1.32452
ENSG00000196924	FLNA	9.37095	9.90499	8.78881	9.18625	9.02244	8.9513	9.38043	8.8219	8.82229	8.95463	8.74133	8.54474	8.83772	8.96034	9.21796	9.05905	9.38785	9.22861	9.07176	9.0487	8.87712
ENSG00000095713	CRTAC1	9.35196	6.16659	8.22627	6.08289	7.19391	6.46539	8.61649	-0.487328	-1.33055	-1.12828	1.46547	1.97478	-0.144338	1.38476	1.24162	1.2569	-1.05801	-0.826865	0.353357	-0.989975	-0.120165
ENSG00000124942	AHNAK	9.34882	8.29585	8.98997	8.78164	8.7589	8.82726	8.94358	7.90758	8.31762	8.33439	8.23836	8.37245	7.84216	7.90044	7.75532	7.7376	8.4243	8.13659	8.08027	8.1171	7.59245
ENSG00000075624	ACTB	9.22624	8.606	8.71267	8.70672	9.06881	8.25688	8.4657	9.60845	9.25602	9.63569	9.35634	9.96279	9.18884	9.52237	9.48317	9.54859	9.52273	8.87649	8.65197	9.26647	8.6938
ENSG00000182492	BGN	9.04091	7.54029	8.29954	8.48267	8.58139	7.99617	8.40175	5.72751	5.05103	4.68581	5.53977	6.1341	5.63723	5.64192	6.6027	6.49708	5.01351	6.09182	5.78814	5.73702	5.13648
ENSG00000240583	AQP1	9.00806	9.01812	8.97747	9.75047	8.59091	8.92969	8.49071	0.567878	-0.37197	1.16535	3.69121	3.07556	1.20421	2.27025	1.32221	1.74986	-0.0354063	0.772276	2.32974	-0.0587969	-0.803692
ENSG00000100345	MYH9	8.97598	9.07506	8.78722	8.96823	8.58774	8.35226	8.79694	8.2673	8.39348	8.79836	8.55582	8.32786	8.11307	8.57154	8.52946	8.54025	8.77783	8.46372	8.13548	8.191	8.00302
ENSG00000198804	MT-CO1	8.89189	6.38747	8.24325	8.28726	8.27572	7.45304	7.34018	8.34886	8.04215	8.17747	7.08189	8.48838	7.50042	7.91934	7.94591	7.64154	8.22132	6.48184	7.9743	7.61531	7.10883
ENSG00000184009	ACTG1	8.88527	9.21014	8.5555	8.86863	8.6047	8.81451	9.22185	9.50683	9.2522	9.49321	9.46151	9.62246	9.59451	9.65848	9.74719	9.5538	9.57371	9.42705	9.26312	9.53236	9.42419
ENSG00000167658	EEF2	8.87984	9.15764	8.25585	8.71328	8.89613	8.90976	9.15158	8.96515	8.63553	8.6069	8.45115	8.33657	8.72741	8.53784	8.98767	8.84405	8.99963	9.02309	8.89061	8.69032	8.34712
ENSG00000087245	MMP2	8.81161	7.43959	7.66139	8.25596	8.38815	8.56002	8.20338	6.17997	5.38006	5.20776	5.00156	4.7755	4.74866	5.92266	6.69498	6.38996	6.22866	6.60318	6.01842	6.16814	6.34723
ENSG00000174640	SLCO2A1	8.73595	6.60238	8.1211	8.14907	7.30126	7.47845	7.33193	-2.98302	-1.17583	0.156759	2.11574	3.47373	0.0822204	1.94446	-2.15199	-2.22918	-2.58347	-2.28897	-1.54886	-1.14098	-1.42855
ENSG00000164692	COL1A2	8.73279	9.44396	7.32379	7.98535	8.89869	8.27629	9.44491	0.367474	-0.115956	0.751269	2.21033	1.83867	2.43379	-0.51761	-0.364214	-0.525901	-0.969652	0.329939	-0.346615	0.417201	-1.0932
ENSG00000136068	FLNB	8.70466	7.81079	8.21641	8.40464	8.13945	8.2615	8.55269	8.05037	8.1207	8.24213	7.64119	7.60681	7.78671	7.89936	8.08386	7.7759	8.54357	8.32019	8.1254	8.05165	7.92689
ENSG00000173706	HEG1	8.60156	6.66566	8.62744	8.60753	8.32291	8.22873	8.44533	4.95314	4.64673	5.33988	6.08255	6.76765	5.79251	4.91405	5.00139	4.46591	4.85368	4.71951	4.93629	5.11387	4.38434
ENSG00000143878	RHOB	8.57929	9.55787	9.32204	9.08669	8.40487	9.12969	8.32807	7.00208	6.77432	6.02215	6.31746	5.35356	6.87087	6.60953	6.85178	6.41643	6.7108	7.36614	6.74474	6.96888	6.89469
ENSG00000125740	FOSB	8.53956	6.58595	9.31272	6.38523	8.03351	7.70986	7.67475	-1.74424	-2.30358	-1.98189	-1.99397	-1.35179	-2.07034	-2.37923	-2.67046	-1.49222	-2.2016	-2.85929	-1.89551	-2.34361	-2.61542
ENSG00000138722	MMRN1	8.53161	9.63968	9.55299	8.87898	8.7044	9.20803	8.99757	7.42352	7.83715	8.36191	8.70039	8.47706	8.43531	7.43138	8.04032	8.1013	7.56547	8.16214	8.84259	8.41882	7.61024
ENSG00000150938	CRIM1	8.52797	7.61984	8.85383	8.7578	8.12454	8.39176	8.74252	7.06394	7.22165	7.096	7.72381	7.54781	7.42272	7.31354	7.13109	6.9513	7.29811	7.59358	7.39596	7.2542	7.25307
ENSG00000108821	COL1A1	8.52658	9.57319	6.33115	7.91115	9.0392	7.92296	9.21328	-2.26933	-2.30358	-1.18543	1.43546	-0.15624	-1.86389	-2.37923	-2.52236	-2.47019	-2.76988	-2.47742	-1.75962	-1.22286	-2.81246
ENSG00000245532	NEAT1	8.50523	7.29482	9.52506	7.35036	7.62212	7.19582	7.35981	8.38869	7.97474	7.4793	7.26959	6.88738	7.19056	7.18502	8.16395	7.93897	8.2767	7.95917	8.22713	7.09231	6.86311
ENSG00000117298	ECE1	8.48803	7.95831	7.42995	8.00059	7.41723	7.43067	7.6246	7.73332	7.26733	7.94216	7.16681	7.52443	7.05422	7.29298	8.23734	8.07533	7.84365	7.63393	7.71271	7.3845	7.3537
ENSG00000204592	HLA-E	8.4744	8.28925	8.64208	8.97668	8.25135	8.50767	8.53297	5.84847	5.10612	6.02432	6.01779	5.78578	5.30884	5.36569	6.15153	5.68432	6.12796	6.24233	6.54963	5.20304	5.24322
ENSG00000156508	EEF1A1	8.46935	9.84903	8.79314	8.87864	8.66917	8.86013	9.13048	8.46846	8.52828	8.49783	8.23188	7.98454	8.35991	8.32579	8.64968	8.47807	8.6298	8.74696	8.68382	8.48179	8.26597
ENSG00000178209	PLEC	8.45226	7.72486	7.38245	8.02083	6.74212	7.50619	7.89604	6.878	6.94162	6.85216	6.73927	6.18762	5.99385	7.09695	7.10944	6.98707	7.18507	7.16296	6.66565	6.65276	6.85092
ENSG00000026025	VIM	8.41989	8.48159	8.61085	8.61283	8.15685	8.61128	8.8944	8.68062	8.43904	8.95698	8.48209	8.66479	8.63767	8.42382	8.88999	8.48315	8.66545	8.68218	8.93608	8.55992	8.6018
ENSG00000109472	CPE	8.36596	8.58288	9.50671	9.8269	8.7332	9.16274	9.28219	1.97117	2.77916	4.21761	4.47871	4.39359	3.75318	3.33669	0.353706	0.567564	1.35228	1.98658	1.56068	1.89464	0.441011
ENSG00000142192	APP	8.31858	8.05209	8.69519	8.32057	8.42781	8.44407	8.32288	7.86719	7.3466	7.84312	7.19367	7.51927	7.21239	7.38512	8.07208	8.10767	7.95572	7.84176	7.82612	7.36689	7.31503
ENSG00000161638	ITGA5	8.31678	8.68052	8.23521	8.35368	7.08349	7.78288	7.86461	8.85544	8.54466	8.74735	8.41264	8.90495	8.91788	9.03501	9.17688	8.84823	8.77769	8.77719	8.34856	8.95166	8.51664
ENSG00000120129	DUSP1	8.31295	8.95417	9.36146	7.86482	8.93734	8.01068	8.14664	3.43044	3.48553	4.03345	4.60707	4.65908	4.39287	3.98475	3.70646	3.64592	3.69688	3.63693	2.99406	3.43274	3.17816
ENSG00000124212	PTGIS	8.24003	7.62937	8.03181	8.56169	6.75346	7.46301	7.85002	-0.781389	-0.582737	0.256678	2.54373	1.87889	1.88027	-0.0020686	-1.61313	-1.96	-1.79497	-0.469053	-1.54886	-0.821046	-1.90323
ENSG00000197694	SPTAN1	8.22769	6.99851	8.51639	8.43438	8.20939	8.22376	8.20068	6.35299	6.09175	6.07348	6.07019	6.40847	6.09673	6.20729	6.3425	6.22783	6.2234	6.05496	6.20389	6.02111	5.67479
ENSG00000118523	CTGF	8.22704	7.69685	9.20416	7.99947	9.04823	8.50866	9.01471	7.01263	6.90379	6.68388	8.12622	8.37969	7.50747	7.99981	6.89348	6.95181	6.65356	6.68322	6.04722	7.27194	6.55551
ENSG00000072110	ACTN1	8.21308	7.94871	7.75968	7.81173	7.40529	7.14497	7.43829	6.63514	6.45785	6.76105	6.80541	6.98504	6.76085	6.55043	6.82004	6.62553	6.78332	6.35643	6.42056	6.49614	6.26011
ENSG00000177469	CAVIN1	8.18121	7.87019	8.05891	8.13417	7.48266	8.23113	8.32031	7.66505	7.78413	8.04623	8.1739	8.06885	8.05686	8.11236	7.82693	8.08611	7.81777	7.83343	7.92874	8.13346	8.0022
ENSG00000115306	SPTBN1	8.17612	7.44715	8.13413	8.7839	7.77708	7.95592	8.18245	7.35616	7.25732	7.32072	6.95567	6.98504	6.97788	7.01377	7.67536	7.32595	7.60654	7.32585	7.35134	6.97892	6.86018
ENSG00000106991	ENG	8.08469	6.34366	7.12007	7.23261	7.09458	6.49498	6.71525	6.94446	6.73035	6.57867	6.47018	7.38434	6.70683	7.48553	6.57201	6.61783	6.63607	6.14506	5.72709	6.76976	6.166
ENSG00000143341	HMCN1	8.08067	6.24606	7.74067	7.46244	8.22714	8.26806	7.9673	2.26642	2.57997	3.06862	4.57417	4.37613	4.07628	3.19322	2.35968	2.07225	2.53075	2.96283	2.35054	1.99539	1.3672
ENSG00000128016	ZFP36	8.06927	6.54851	9.23717	7.64641	8.69336	8.2115	7.84267	0.497242	0.488424	1.077	0.859314	1.81813	0.286673	0.710305	0.516691	0.578172	1.08294	0.101944	0.433527	0.630393	-0.607771
ENSG00000127603	MACF1	8.04716	7.60308	7.38283	7.59489	7.70461	7.47075	7.82493	7.60235	7.66855	7.69928	6.94993	7.02675	7.03162	7.17868	7.51237	7.21105	8.11558	7.95845	7.67245	7.49417	7.23536
ENSG00000163430	FSTL1	8.04012	8.75076	8.62582	8.72528	8.20861	8.44013	8.73682	6.74836	6.39493	7.67991	7.64645	7.8093	7.53098	7.34957	7.44296	7.02257	7.26273	6.9486	6.91562	7.33092	7.35908
ENSG00000132470	ITGB4	8.0116	6.88436	6.53038	7.35533	5.90966	6.99208	6.84641	-0.388475	-0.00318765	3.92542	3.43609	3.64092	3.02688	2.74804	0.400857	0.965195	0.35513	0.707344	1.9826	2.38733	-0.305828
ENSG00000095303	PTGS1	7.94972	6.44876	7.55796	7.503	7.27825	7.47494	6.98111	2.61748	2.90587	3.71611	4.54168	5.36688	4.54822	2.96626	3.08226	2.62624	2.31025	1.59816	2.60148	3.86862	2.34075
ENSG00000090006	LTBP4	7.9401	5.49453	6.81737	6.65999	7.31518	6.83056	7.0221	2.52414	1.48456	2.60833	2.23667	2.0647	1.48661	2.33602	3.41987	3.45336	3.14115	3.42106	2.55662	2.3856	1.90011
ENSG00000280614	FP236383.2	7.93435	-5.52529	5.62768	-7.14968	7.53494	3.71792	-4.49311	4.92459	-1.50388	-4.64486	3.33	6.69031	-6.50774	2.49084	-7.87991	5.22118	-6.0429	-3.65575	-8.23536	-5.99896	-8.17001
ENSG00000184557	SOCS3	7.90525	8.87556	8.8654	8.9596	8.9874	9.25293	8.66894	3.53991	3.51044	2.92415	2.79873	3.10552	2.82392	2.94885	2.60692	2.34805	2.20344	2.27249	2.35803	2.76458	2.85582
ENSG00000085063	CD59	7.89936	8.5226	7.50227	7.90004	6.99476	7.21259	7.90184	7.01274	7.0018	7.40079	7.82425	7.82756	7.53086	7.42061	7.51183	7.47734	7.13208	7.22798	7.01993	7.51907	7.59752
ENSG00000010327	STAB1	7.8921	7.78593	6.51927	6.47888	6.75669	7.08645	6.79657	7.24074	6.97848	6.28744	6.49993	6.04136	6.6358	6.89582	7.16213	6.79667	7.00632	7.03695	6.66678	7.15728	7.00316
ENSG00000198938	MT-CO3	7.87555	5.89062	7.99518	7.59395	7.57021	7.03483	7.18082	7.39267	7.58781	7.30298	6.93236	7.94068	7.05819	7.3608	6.967	6.99649	7.33001	6.38641	7.54372	7.36728	6.94661
ENSG00000079308	TNS1	7.86817	7.02361	6.92443	6.79586	7.81729	6.91795	7.05118	4.23769	4.0323	4.61017	4.71456	4.96606	4.27716	4.91719	4.22698	4.03856	4.07474	3.95002	3.99136	4.23585	3.62156
ENSG00000198886	MT-ND4	7.80311	4.70553	7.6487	6.90738	7.03073	6.32717	5.58398	7.11042	7.48921	7.26815	6.25906	8.14658	6.67615	6.90589	6.21606	6.48003	6.54917	4.35164	6.20817	6.09979	4.93671
ENSG00000168056	LTBP3	7.7791	6.35033	7.03875	7.20822	6.888	7.00354	7.15318	4.31893	3.52931	3.36201	3.50513	3.48355	3.72787	4.16145	4.75422	4.48577	3.95663	4.3392	3.95663	4.27507	3.33232
ENSG00000132561	MATN2	7.77003	7.66056	7.57885	7.76979	7.3551	8.24908	7.62382	-0.278151	-0.0472428	0.133582	4.02756	3.66412	2.37388	1.46044	-0.317672	-0.375034	-2.58347	-0.665276	0.195094	-1.20195	-1.66222
ENSG00000171223	JUNB	7.74546	7.71654	8.33383	7.58783	8.33159	8.05298	7.62382	1.90645	1.91594	2.07244	1.39965	1.66556	1.47144	1.40533	2.50918	2.27495	2.2624	2.53199	2.46421	1.63766	1.26253
ENSG00000173269	MMRN2	7.73948	7.6912	8.01039	8.26173	7.53494	7.8027	7.9722	6.27276	6.01182	5.74925	5.98774	6.20601	6.16593	5.83462	6.45331	6.41088	6.00593	6.17722	6.54851	6.16462	5.95257
ENSG00000171992	SYNPO	7.73196	6.09355	7.25888	7.34749	7.00519	7.02343	6.92654	4.93703	4.90551	5.52465	5.53417	6.11318	5.29167	5.38556	5.12202	5.11682	4.78814	4.156	4.66041	4.93782	4.26644
ENSG00000142871	CYR61	7.72592	6.64578	8.3739	6.53803	7.72342	7.93026	8.09481	5.53881	5.1856	5.14068	6.21962	6.74641	5.5463	5.80274	4.86849	5.1973	5.19769	4.58892	4.4851	4.97301	4.51539
ENSG00000125810	CD93	7.7235	7.52461	6.7048	5.34042	6.70919	8.28456	6.71915	7.81441	7.76375	8.11718	7.4952	7.64794	6.9009	7.15429	8.18868	8.23217	7.76616	7.6694	7.91615	7.41939	7.98106
ENSG00000187498	COL4A1	7.72229	9.07673	5.60158	6.43517	7.64928	7.37678	7.99217	7.02445	6.58708	5.22362	4.60595	4.49248	5.06132	6.30051	7.71671	6.81093	6.48254	6.64159	6.52635	6.18213	7.14227
ENSG00000164867	NOS3	7.72107	5.64942	6.45221	6.81926	5.66724	6.41309	6.08224	5.30663	4.9552	5.28703	4.999	5.77982	5.42975	5.27742	5.34875	5.1295	4.9023	4.31397	4.87268	5.3224	4.43616
ENSG00000177606	JUN	7.71346	7.899	8.71465	7.46854	7.73436	7.37519	7.04712	5.06552	4.7882	5.06422	4.78863	4.43632	4.51439	4.73057	4.75195	4.82276	5.18812	4.94279	4.24619	4.72504	4.82275
ENSG00000147065	MSN	7.70888	8.03818	7.25721	7.94296	6.87421	6.69806	7.09401	8.3859	8.31109	8.91554	8.09637	8.33194	8.06482	8.33943	8.46253	8.09266	8.40674	8.1344	7.89708	8.19482	8.06145
ENSG00000116016	EPAS1	7.70213	6.40409	7.84169	7.72324	6.91376	7.19942	6.95284	6.34942	5.90316	6.19496	6.02851	6.45078	6.06124	5.78789	6.67725	6.37539	6.1427	6.226	6.90679	5.67302	5.27513
ENSG00000265972	TXNIP	7.66536	7.42556	8.04542	8.47046	7.69875	7.79904	7.81927	0.735064	0.729432	2.15244	3.5583	2.9156	0.97069	2.09453	2.12431	1.50501	1.91323	2.96899	3.63847	0.618687	-0.592585
ENSG00000091136	LAMB1	7.63989	7.47124	7.19965	7.58931	7.8142	7.68604	7.7621	7.22959	7.00535	7.1207	6.81065	6.90118	6.79551	6.98042	7.65375	7.49476	7.55441	7.65555	7.61627	7.08229	6.93397
ENSG00000107736	CDH23	7.62211	4.61383	7.33254	6.81872	6.44032	7.07741	6.43007	-3.10332	-1.08119	-0.557397	1.22356	1.83867	-0.873537	0.553241	-3.63199	-2.3853	-3.5404	-3.14879	-2.30462	-2.59297	-2.23928
ENSG00000137076	TLN1	7.61232	7.70077	7.16085	7.2494	7.39498	7.06258	7.14252	7.51231	7.51595	7.40593	6.99659	7.16022	7.26075	7.14477	7.53163	7.36227	7.85504	7.61519	7.40909	7.36635	6.79428
ENSG00000166147	FBN1	7.59354	7.68075	6.63831	6.78355	7.20694	6.69505	7.34633	4.33204	4.37146	4.25366	4.9267	4.56823	4.64264	4.47298	5.05801	4.75366	4.48686	4.9095	5.27107	4.64543	4.21126
ENSG00000068001	HYAL2	7.58989	7.72614	7.19878	8.2859	6.50888	7.30022	7.6374	6.36491	6.16448	5.97709	6.00827	6.14187	6.07871	6.31401	6.63609	6.42453	5.54909	5.60795	5.57391	6.34849	6.21807
ENSG00000204217	BMPR2	7.58188	6.67141	7.93008	7.5156	7.70266	7.7855	7.80902	5.40085	5.20451	4.94156	5.3383	5.49451	5.09974	5.69302	5.33759	5.11409	5.01351	5.0507	5.18394	5.23046	5.50164
ENSG00000130635	COL5A1	7.57485	7.3312	6.80484	6.84565	7.29277	7.09824	7.38349	5.98126	5.75911	5.19836	5.77109	5.09862	5.74443	6.28724	6.49329	6.23706	5.81495	6.23387	5.81611	6.3862	6.03372
ENSG00000204628	RACK1	7.57215	8.09794	7.05663	7.82926	7.59294	7.77742	7.85722	8.17546	7.9033	8.03313	7.59839	7.49986	7.87922	7.74625	8.10395	7.86198	8.28612	8.13736	8.01529	7.98615	7.70624
ENSG00000153162	BMP6	7.56405	7.36693	7.43992	7.591	7.26774	7.69753	7.56265	5.43938	5.26205	5.25685	5.70451	5.65582	5.77949	5.67672	5.54701	5.05266	5.41499	5.74816	5.55957	5.7703	5.50716
ENSG00000076706	MCAM	7.47611	7.49227	6.47611	7.3986	6.42621	7.03116	7.17746	8.72466	8.49483	8.81365	8.36655	8.42485	8.21009	8.02983	9.01226	8.59539	8.52262	8.34137	8.31396	8.37753	8.4159
ENSG00000143384	MCL1	7.47035	8.52815	9.1215	7.40113	7.81806	8.19488	8.4993	4.94369	5.42005	5.14974	5.88971	5.70699	5.79461	5.79886	5.08893	5.22751	4.99625	5.27078	5.31527	5.57194	5.86504
ENSG00000198786	MT-ND5	7.46781	4.50123	6.93701	6.42952	6.27094	5.67321	5.27541	6.15684	6.69944	6.40067	5.50648	7.13475	5.46248	5.94589	5.50743	5.6467	5.79144	4.43645	5.08191	4.97359	4.26592
ENSG00000143248	RGS5	7.45655	6.05669	6.87299	6.21951	7.02272	7.36605	6.70571	6.31573	7.16711	6.63791	6.20005	6.62346	7.1103	7.38107	6.79698	7.4221	7.38306	7.17959	7.35613	7.50945	7.98964
ENSG00000160789	LMNA	7.4529	7.55369	8.45813	7.32498	5.89314	6.90177	7.3457	7.05354	6.82846	6.83273	6.68066	6.3286	6.85698	6.91029	7.0541	7.23356	7.0762	6.9525	6.94093	7.12855	7.03452
ENSG00000134871	COL4A2	7.44924	8.41144	5.20378	6.23362	7.11274	7.20643	7.71945	6.98293	6.70713	5.41298	4.999	4.69472	5.23555	6.36987	7.50591	6.65338	6.64455	6.84593	6.52936	6.25542	7.11275
ENSG00000179776	CDH5	7.44704	7.08165	7.53056	7.5891	7.01241	7.09561	7.22311	8.07883	7.9834	8.05888	7.44078	7.54742	7.39705	7.68321	8.16761	7.94353	7.99049	7.87832	7.87792	7.86269	7.74724
ENSG00000127329	PTPRB	7.43265	7.0086	7.94339	8.13706	7.76726	7.78539	7.6745	5.25328	5.27832	5.12718	5.28882	5.27286	4.99559	5.511	5.49417	5.19126	5.30896	5.32047	5.31407	5.15598	5.19535
ENSG00000123358	NR4A1	7.42372	4.77506	8.39684	6.07115	6.17936	7.06849	7.3609	-0.661095	-1.27711	-0.803558	-0.373158	-0.0771687	-1.15019	0.127408	-0.513592	-0.856374	-0.551048	-0.436075	-0.784147	-0.546105	-1.69428
ENSG00000070756	PABPC1	7.40834	5.7319	7.31538	6.72598	7.95049	6.84671	6.88182	6.91222	6.57759	6.61782	6.6276	7.38608	6.15441	6.67811	6.62459	6.76988	6.26269	5.81046	5.49755	6.08325	5.11148
ENSG00000109971	HSPA8	7.40532	8.1302	6.65554	7.61359	6.78276	6.92765	6.98698	8.65246	8.93847	8.62931	8.73249	8.92782	8.97228	9.02359	8.36907	8.05714	8.20099	8.00464	7.6853	8.31973	8.1184
ENSG00000076356	PLXNA2	7.39926	5.83061	6.6124	7.10572	6.18815	6.65271	6.61685	6.79538	6.52661	6.54201	6.31162	6.6963	6.53807	6.76761	6.68537	6.41643	6.7944	6.68075	6.31304	6.80779	6.49349
ENSG00000197746	PSAP	7.38054	8.10607	7.36742	7.78774	7.56898	7.66442	7.90911	6.97239	6.31344	6.59507	6.45903	6.17858	6.38777	6.39081	7.39843	7.30883	7.0904	7.17075	7.22896	6.72576	6.79672
ENSG00000100201	DDX17	7.37977	7.28441	7.79868	7.21903	7.21985	7.443	7.07057	6.56395	6.63338	6.65301	6.59659	6.42978	6.5326	6.58381	6.63671	6.55981	6.85084	6.8725	7.12463	6.68451	6.7731
ENSG00000120738	EGR1	7.37438	4.92006	7.78309	5.51366	7.91219	7.80839	7.11043	0.497242	0.578155	1.31192	0.63126	2.45224	0.362622	0.506396	-0.396098	0.0476572	0.557012	0.722028	0.368268	-0.532989	-1.86623
ENSG00000133112	TPT1	7.36392	7.7501	8.07797	7.58159	7.9406	7.92691	8.12752	6.67154	6.58392	6.60813	6.72707	6.78031	6.60432	6.60425	6.62869	6.70224	6.3306	6.48117	6.57084	6.52729	6.52069
ENSG00000115594	IL1R1	7.31245	6.44301	7.32578	6.99267	6.78013	7.07278	6.96458	1.59471	1.68636	2.83896	4.08507	4.88692	3.61336	2.98688	1.56923	1.3024	0.907412	0.957406	1.51451	1.73845	0.827166
ENSG00000096384	HSP90AB1	7.31043	8.21719	7.27508	7.56355	7.044	7.33901	7.47361	8.35489	8.35796	8.18757	8.21772	8.22521	8.47155	8.41497	8.08197	8.10211	8.15383	8.06685	7.85167	8.31141	8.24954
ENSG00000182718	ANXA2	7.30396	7.39785	6.88548	7.22502	6.28664	6.58353	6.80965	8.91084	8.73022	9.17373	8.81959	8.94819	9.09856	8.803	8.82024	8.46155	8.71624	8.47032	8.44529	8.81987	8.52087
ENSG00000102265	TIMP1	7.30112	6.91168	6.51788	7.25686	6.07383	5.88836	6.23124	4.42127	4.3084	4.52868	4.61769	5.51379	5.08175	4.72547	4.24905	3.97476	3.45495	3.19501	3.46117	4.17321	3.1332
ENSG00000003436	TFPI	7.2942	6.37318	7.90602	7.03868	7.65332	8.17449	7.54465	5.94357	5.97753	6.41906	6.17851	6.28857	5.88287	5.7991	6.31276	6.05871	5.86386	6.07494	6.80857	5.51051	6.14492
ENSG00000178695	KCTD12	7.29175	5.88144	8.30965	6.48593	7.28348	7.87966	7.43815	5.0235	5.05038	4.69276	5.32097	5.75234	4.51162	5.11556	5.47144	5.45929	4.65956	5.13918	5.77473	4.47576	5.12389
ENSG00000004399	PLXND1	7.27074	5.51614	7.25638	6.69297	6.49992	6.87563	6.7509	7.01184	6.57396	5.93015	5.97519	6.54127	5.7521	6.27681	7.08239	7.1221	6.52165	6.49393	6.50742	5.84629	5.78536
ENSG00000196159	FAT4	7.27033	6.33721	6.58269	6.24492	7.09883	6.59996	7.03114	3.95855	3.8142	3.6141	3.70909	3.70664	3.15819	3.33267	4.2309	3.69182	4.17828	4.24702	4.60601	3.56137	3.63533
ENSG00000183255	PTTG1IP	7.26991	7.52982	7.36355	7.46486	6.78276	7.1082	7.33352	6.1928	6.05185	6.0691	6.12154	5.99351	5.9955	6.06382	6.18373	6.08102	5.98788	5.8955	5.97387	6.18684	6.30464
ENSG00000123104	ITPR2	7.26117	6.51602	6.851	6.86861	7.04003	7.07028	7.13251	5.29366	5.24788	4.54139	5.37598	5.34012	5.44633	5.21869	5.19673	4.66252	4.68417	5.09014	5.09933	5.1504	4.81387
ENSG00000198727	MT-CYB	7.25237	4.59408	6.91704	6.60197	6.42147	5.67931	5.23719	6.39089	6.87991	6.69022	5.78554	7.30354	5.82233	6.23791	6.06288	6.2852	6.37434	4.66404	5.96024	5.65827	4.84975
ENSG00000139567	ACVRL1	7.24774	7.59554	6.49891	6.97566	6.52094	6.92627	6.95139	5.92158	5.72063	5.95185	5.68153	5.90438	5.63936	5.73401	6.40252	6.26318	6.17919	6.44636	6.67935	6.12742	6.24962
ENSG00000099204	ABLIM1	7.24732	6.58356	7.48274	7.64844	7.19073	7.64703	7.4215	4.63021	4.11458	4.95485	5.27441	5.29346	4.49624	3.71495	5.03951	4.80931	4.27564	4.62502	5.54877	3.68087	3.72063
ENSG00000152377	SPOCK1	7.24605	5.21589	6.75362	5.84379	6.09182	5.99462	5.75979	6.0754	5.21911	4.94656	5.60637	5.22686	4.88511	5.70914	6.63252	6.31781	5.81417	6.497	5.23339	6.26154	6.2225
ENSG00000174175	SELP	7.24352	7.16841	6.68194	6.53101	7.01869	7.29151	6.78847	-0.756515	-0.71862	2.49469	3.74725	4.61362	1.96934	1.13667	-0.348533	-1.96	-1.95544	-0.870258	-0.922475	-0.821046	-1.60016
ENSG00000179218	CALR	7.24098	8.02789	7.24082	7.34487	6.64913	6.66151	7.10671	8.14169	7.89459	7.70734	7.65359	7.7325	8.05881	7.88816	7.86137	7.57184	7.75304	7.65543	7.57373	7.74412	7.55788
ENSG00000111640	GAPDH	7.23334	7.91259	7.48916	7.82881	6.91712	6.90998	7.28801	8.65478	8.50476	8.86951	8.20295	8.37487	8.41371	8.11953	8.67406	8.4812	8.77982	8.29789	8.48645	8.39648	8.082
ENSG00000064989	CALCRL	7.2295	6.95961	8.30014	7.64733	8.50465	8.74977	8.16809	5.07031	5.38473	6.04504	5.88278	6.17101	5.4608	4.953	5.30883	5.25958	4.86224	5.063	6.1577	4.8545	5.57912
ENSG00000167978	SRRM2	7.20843	4.80823	7.02948	6.36171	6.70419	6.2548	5.8295	6.29821	6.23054	6.15811	5.77384	6.68677	5.50872	6.14424	6.11205	6.17465	6.45636	5.81539	5.56099	5.66682	4.84766
ENSG00000127022	CANX	7.20322	7.88228	7.68427	7.50479	7.2617	7.2829	7.61822	7.53303	7.68589	7.43103	7.70696	7.68048	7.88352	7.72397	7.4599	7.39938	7.0095	7.33394	7.29861	7.62535	7.73939
ENSG00000100316	RPL3	7.20018	7.17709	7.01175	6.87174	7.22374	7.19467	7.56509	7.19425	6.84851	6.81235	6.76501	6.72036	6.67956	6.78439	7.07041	7.27194	7.08278	6.87424	6.53979	6.78408	6.20876
ENSG00000073756	PTGS2	7.18176	8.02027	8.54218	6.48525	8.02684	8.4864	7.87152	2.01878	2.94012	3.30091	2.91745	3.86018	3.16763	3.93255	1.08875	0.98127	1.53453	1.61005	1.45987	1.96567	1.90547
ENSG00000133392	MYH11	7.17557	7.43537	5.8667	6.38645	6.61043	6.60194	6.47397	-0.756515	-1.12773	-1.7487	-1.889	-1.91367	-2.53812	-1.95542	-1.94918	-2.30513	-1.21847	-0.848398	-1.22413	-1.69154	-1.66222
ENSG00000100368	CSF2RB	7.14466	7.40723	6.55575	7.08267	6.47272	5.96648	6.38602	3.75196	3.89209	3.76877	4.83534	4.29857	4.23737	3.51884	3.6742	3.26431	3.15922	3.28429	3.96768	3.39121	2.83069
ENSG00000130300	PLVAP	7.1301	6.89528	6.7273	6.69218	6.73886	6.40007	6.28382	3.1909	1.82723	-0.615112	2.73035	2.34865	1.63351	3.16635	2.65439	2.43816	-0.0656209	2.45936	1.22202	2.36998	1.66761
ENSG00000166598	HSP90B1	7.11169	7.77176	7.80298	7.40305	6.89778	6.87277	7.27201	7.42878	7.55215	7.46225	7.43329	7.61706	7.61716	7.65141	7.24941	7.27316	7.12488	7.59089	7.24357	7.47644	7.41785
ENSG00000105974	CAV1	7.10845	5.6149	6.8219	6.9568	5.36729	7.38255	7.07323	7.233	7.51133	8.23954	8.06231	7.76388	7.3263	7.01168	7.28597	7.48519	7.77658	7.52268	8.08616	7.52961	7.96796
ENSG00000114353	GNAI2	7.10426	7.03416	6.74351	7.22502	6.52221	6.44652	6.75375	7.35375	7.104	7.40669	6.93437	6.92868	6.91051	6.89979	7.54264	7.27805	7.4111	7.36439	7.29983	7.13466	7.04343
ENSG00000137154	RPS6	7.09632	8.62331	7.20962	7.42616	7.51794	7.36371	7.47433	7.26893	7.34421	7.14653	6.90662	6.79385	7.25868	7.12707	7.3201	7.26159	7.37464	7.46097	7.20943	7.32553	7.14595
ENSG00000154175	ABI3BP	7.09351	3.71072	7.73378	6.86652	6.95319	6.87522	6.04702	1.63286	1.74566	0.758862	2.61239	4.293	2.36159	0.467793	3.01718	2.15607	0.0932358	0.358414	0.911847	1.61427	0.243614
ENSG00000120156	TEK	7.05163	6.99147	7.14558	7.31442	6.65491	7.06114	7.07456	4.30939	4.21474	4.78583	4.77172	5.23269	4.57463	4.73667	4.76372	4.5679	4.19351	4.42359	4.81228	4.38711	4.32259
ENSG00000107796	ACTA2	7.04485	8.02565	5.74559	6.76312	6.92	6.83077	7.05292	0.0804798	-0.488614	-1.43975	-0.876396	-1.1767	-1.17384	-0.84196	-1.2217	-1.78666	-0.370476	-0.848398	-0.21855	-0.95457	-1.76062
ENSG00000110321	EIF4G2	7.03561	7.37274	7.31377	7.34312	7.20379	7.2635	7.26886	8.0496	8.1038	8.15871	7.99319	8.16015	8.04563	8.0697	7.91361	7.89046	7.71882	7.67236	7.66506	7.99781	8.14943
ENSG00000142534	RPS11	7.03071	7.68279	6.76836	7.42663	7.34549	7.27145	7.45519	7.52457	7.18627	7.23664	6.87075	6.68394	7.16229	6.98875	7.42967	7.26005	7.35758	7.23359	7.27883	7.23097	6.90759
ENSG00000104419	NDRG1	7.02384	6.36307	8.25857	7.92484	5.95248	7.03263	6.71793	2.71186	2.57634	3.98894	3.5756	4.15651	2.58941	3.02228	2.82312	2.952	2.91226	2.52782	2.83811	2.65996	2.33481
ENSG00000197102	DYNC1H1	6.98946	6.60795	6.37727	6.61364	6.68344	6.37511	6.59581	7.04516	7.18344	6.93157	6.56127	6.55684	6.67491	6.76213	6.98422	6.80233	7.54327	7.26064	6.95921	7.00361	6.51588
ENSG00000129538	RNASE1	6.9712	6.09691	7.39883	7.56065	7.07275	7.04886	6.88551	3.96137	3.6737	4.70951	4.03509	4.42957	3.8553	3.8903	4.26251	4.06426	3.86549	3.60955	4.5384	3.94208	3.32534
ENSG00000149273	RPS3	6.97069	8.1003	6.57198	7.01342	6.99157	7.12412	7.45182	7.62922	7.22527	7.25504	7.2319	6.97811	7.23249	7.27257	7.47994	7.30475	7.37438	7.43704	7.191	7.20429	7.10316
ENSG00000163520	FBLN2	6.96711	7.55591	8.27353	8.82977	8.21409	6.93689	8.15915	-1.69614	-0.458557	0.168209	1.21769	0.462197	-0.144338	1.05438	-2.75063	-1.4485	-2.07327	-1.9264	-2.08561	-1.08249	-2.88461
ENSG00000115677	HDLBP	6.96506	6.97014	6.63895	6.98306	6.7938	6.80394	7.02604	7.42429	7.26761	7.34961	7.1518	7.21819	7.48298	7.31481	7.40386	7.26795	7.60182	7.46418	7.39812	7.39697	7.11268
ENSG00000168036	CTNNB1	6.95011	7.74962	7.45129	7.63685	7.04971	7.29212	7.45519	6.68068	6.50675	6.45046	6.38017	6.15626	6.38448	6.40939	6.93091	6.95155	6.54542	6.89929	6.79086	6.56247	6.90734
ENSG00000000971	CFH	6.94648	6.95995	6.69496	6.5526	7.03782	7.47912	7.50018	3.39479	3.20949	3.04553	4.97704	4.91982	5.59478	3.34471	3.87288	3.39756	2.24712	3.15904	3.68908	4.07652	2.33282
ENSG00000204262	COL5A2	6.93971	7.77291	6.6838	6.56639	6.76365	6.58253	7.33209	5.47329	5.69871	5.67569	5.78628	5.19137	6.16741	5.70837	6.29821	6.23874	5.89116	6.14319	5.8195	6.37711	6.02266
ENSG00000034510	TMSB10	6.93762	7.83304	6.50808	7.36189	6.70363	6.72487	6.68792	8.32734	8.11603	8.34987	7.61172	7.54547	7.93111	8.12244	8.42567	7.94142	8.05543	8.20233	7.92772	8.05901	7.88181
ENSG00000202058	RN7SKP80	6.93762	9.31028	6.30308	7.33017	6.85928	6.5524	6.49373	6.78906	5.49588	6.10882	5.68419	5.35088	6.03117	5.5107	6.39832	6.1617	6.72024	6.36888	6.59263	6.42326	5.68105
ENSG00000018408	WWTR1	6.93186	5.6515	7.22509	6.49632	6.3421	6.73121	6.66991	5.40465	5.20744	5.35561	4.94722	5.29067	4.9402	4.96518	5.52243	5.46966	5.08187	5.09544	5.22241	4.92511	4.81458
ENSG00000154734	ADAMTS1	6.92713	6.9512	7.6093	6.7204	6.43697	7.7578	7.3082	3.13882	3.67878	4.42571	5.58004	6.59318	5.03706	4.54022	3.3898	3.63198	2.49755	2.06066	3.46638	3.24469	1.86753
ENSG00000108654	DDX5	6.9266	7.59078	7.5549	7.11704	7.06149	7.20561	7.23931	6.31003	6.28485	6.27475	6.40135	6.47271	6.37458	6.41384	6.39585	6.62616	6.27799	6.51265	6.64972	6.55385	6.62526
ENSG00000172037	LAMB2	6.92555	6.5258	6.77421	6.91127	6.41944	6.41872	6.58704	6.06911	5.80126	5.92426	5.36109	5.5122	5.93805	5.81913	6.51462	6.29227	6.3824	6.19509	6.57697	5.81088	5.55119
ENSG00000148175	STOM	6.92502	7.02585	7.47772	7.80593	7.32173	7.24825	7.47836	4.92218	4.69767	5.21467	5.32097	5.75707	5.43	5.20445	4.87727	4.46805	4.86574	4.44809	4.97242	4.59443	4.54916
ENSG00000130402	ACTN4	6.90592	6.66956	6.58536	7.06639	6.11127	6.17362	6.41243	6.42577	6.29647	6.62602	6.49842	6.77799	6.2978	6.36708	6.55751	6.36049	6.51353	6.22826	6.16078	6.21699	5.97026
ENSG00000049323	LTBP1	6.89949	5.89027	5.74201	4.76732	6.87619	6.88541	6.52857	4.21743	3.09761	2.33369	3.41318	4.1667	4.58831	3.89303	4.87602	3.3825	3.31977	4.51338	3.41524	4.88383	4.30039
ENSG00000141753	IGFBP4	6.89196	5.67458	6.84711	6.2176	6.77377	5.958	5.96858	5.49352	4.77719	4.1178	4.30083	5.11975	3.68002	4.88642	5.11285	5.87168	4.2869	4.10089	3.94983	4.19061	3.72745
ENSG00000113657	DPYSL3	6.88547	6.31141	5.80742	6.2796	5.30989	6.31997	6.47167	5.75939	5.55279	5.59606	5.39657	5.31561	5.29921	6.06422	5.87111	5.66018	5.74894	5.79361	5.53644	5.78215	5.91238
ENSG00000058668	ATP2B4	6.87186	5.68355	6.14671	6.28664	5.83329	6.35706	6.32083	5.66098	5.36228	5.52102	5.02274	5.10923	4.6239	4.72547	5.89395	5.80495	5.70934	5.63608	5.79729	4.99977	5.03226
ENSG00000159388	BTG2	6.85536	6.34134	7.5708	6.88228	7.70906	7.94144	7.23439	3.60854	3.34986	3.46888	3.26467	3.07556	2.78611	2.47875	3.37924	3.50431	3.2371	2.78369	3.58203	2.77648	2.46207
ENSG00000134352	IL6ST	6.83698	6.88807	7.69604	7.16823	7.21946	7.44079	7.41266	6.08059	6.3492	5.81514	6.40264	6.81019	6.54035	6.55144	6.56814	6.23706	5.66374	6.06777	6.69237	6.52563	6.96694
ENSG00000138119	MYOF	6.8178	5.86827	6.16999	6.61052	5.66724	6.15857	6.27954	6.26272	6.27427	6.75525	6.59135	7.05938	6.48761	6.61188	6.32901	6.34737	6.5515	6.28715	6.33539	6.42126	5.96224
ENSG00000196562	SULF2	6.80583	6.63384	7.23446	7.46106	6.75077	6.5598	6.83523	4.10486	4.07916	4.08193	3.66774	2.39098	2.47999	2.88619	4.17027	3.87505	4.17506	3.7736	3.37705	2.62675	3.67744
ENSG00000142089	IFITM3	6.78507	5.43543	6.51228	6.84547	6.32554	6.05655	5.99252	4.54085	4.10329	5.13084	4.53048	5.44262	4.57063	4.10518	4.41384	3.87074	4.39277	3.44891	4.2125	4.09617	3.02659
ENSG00000159176	CSRP1	6.78507	6.90664	6.67131	7.02953	6.40649	6.76561	6.97093	6.18138	6.43726	6.44591	6.47279	6.45244	6.24749	6.34828	6.29805	6.12396	6.0974	5.80745	5.60473	6.2334	6.1445
ENSG00000221866	PLXNA4	6.77633	5.15741	5.99956	5.57761	6.57737	6.33522	6.39579	3.97999	4.02301	3.54551	4.33847	4.70454	4.72368	4.91046	3.66167	3.85119	3.89325	4.27093	3.76781	5.11803	4.22096
ENSG00000047849	MAP4	6.77516	5.8017	6.22829	6.2965	5.89607	5.93149	6.11699	6.11047	6.12128	6.27772	6.15722	6.48049	5.99815	5.99018	6.05165	6.04467	6.18461	5.917	5.82289	6.06153	5.62836
ENSG00000074800	ENO1	6.77516	7.16623	5.92153	6.79641	5.74293	5.80662	6.02003	8.65046	8.67627	8.76828	8.43263	8.54249	8.74727	8.41822	8.3731	8.53307	8.66642	8.11354	8.20699	8.71523	8.4132
ENSG00000167460	TPM4	6.7734	7.23244	6.90961	7.17471	6.35988	6.74404	7.16573	6.94493	7.31989	7.75664	7.47129	7.63662	7.40049	7.54541	7.10757	7.06538	7.0735	6.90312	6.77565	7.20613	7.1853
ENSG00000128567	PODXL	6.7693	6.22834	6.83035	7.81227	6.06605	6.24786	6.76463	6.15274	5.62912	6.91149	6.58581	7.41137	5.31443	7.19003	6.79455	6.74773	5.96914	5.98249	6.06892	5.44595	6.95391
ENSG00000129467	ADCY4	6.76459	5.98432	6.68815	6.49226	5.43463	5.59438	5.7263	3.52096	3.62715	3.4735	2.939	1.87889	2.32831	3.62352	3.99084	3.93405	3.97993	3.88381	3.44632	3.16845	3.34223
ENSG00000115602	IL1RL1	6.76282	5.36472	4.19246	4.042	5.46387	6.19147	6.27093	6.37708	6.62573	5.96401	6.92169	7.66636	7.48682	8.53281	5.68173	5.6757	5.71907	5.18693	5.70651	6.70801	6.48837
ENSG00000162430	SELENON	6.74023	5.60248	6.07264	6.16306	5.98585	5.7573	5.62661	5.15305	4.95381	5.51319	4.77821	5.40094	4.6703	4.8887	5.39868	5.47215	5.58994	5.37143	5.50178	5.05727	4.64156
ENSG00000145012	LPP	6.73482	6.82905	6.46022	6.1783	6.907	6.76163	6.7315	4.18329	4.51754	4.67682	4.62712	4.64019	4.23625	4.45459	4.5073	4.34067	4.74582	4.79567	4.82314	4.42583	4.58758
ENSG00000073849	ST6GAL1	6.72819	6.47764	6.47467	6.65919	6.52914	6.72237	6.5443	5.13072	4.66562	4.83694	5.15021	5.53676	5.25865	4.48148	5.39432	4.93224	4.99259	5.07521	5.55997	4.66085	4.24176
ENSG00000020181	ADGRA2	6.72092	6.21884	6.92706	6.8859	6.66181	6.94451	6.97582	3.13051	3.28694	3.47811	3.90975	3.24283	3.2621	3.22828	3.78853	3.55755	3.24481	3.98924	4.00275	3.38085	3.03761
ENSG00000161016	RPL8	6.71849	7.33236	6.33907	6.71209	6.69469	6.86393	6.77543	7.07361	6.75481	6.63996	6.69998	6.61194	6.84214	6.72182	6.93882	6.85453	6.73593	6.85272	6.56509	6.76752	6.40771
ENSG00000168610	STAT3	6.7075	6.67652	6.40319	6.82536	6.2634	6.30911	6.3516	5.16896	4.92131	5.42108	5.25593	5.47414	5.08206	5.06352	5.22714	5.04407	5.26714	4.89013	5.10129	4.95944	4.91529
ENSG00000147526	TACC1	6.68961	5.98035	7.39921	7.255	6.51714	7.07901	6.97031	6.0571	6.01316	6.12617	5.97866	6.01904	5.59193	5.62585	5.88195	5.83151	5.81521	5.73396	5.93433	5.8038	5.98694
ENSG00000150093	ITGB1	6.68961	7.46144	7.11546	7.18201	6.75776	7.03903	7.1228	7.24421	7.33391	7.68073	7.04552	7.19523	7.10961	7.30843	7.44493	7.31717	7.16894	7.41235	7.24616	7.29586	7.35486
ENSG00000060138	YBX3	6.68277	6.09294	7.23106	6.64322	7.54586	6.16461	6.10885	6.04499	5.60175	5.75945	5.42548	5.44095	5.43416	5.39588	5.97369	5.72993	5.86211	5.72511	5.6656	5.45462	5.22378
ENSG00000137509	PRCP	6.6809	7.34025	6.40243	6.36516	5.8169	6.77309	6.32914	5.32167	5.32766	5.39208	5.97714	5.82233	5.60002	5.27986	5.55979	5.78247	5.10367	5.0802	5.53994	5.24123	5.30585
ENSG00000163017	ACTG2	6.67213	6.84675	5.09386	5.41423	5.84344	5.88063	5.83579	-5.30495	-4.73654	-5.49286	-3.19832	-4.72102	-5.28535	-5.41485	-5.07256	-3.42712	-6.0429	-5.58175	-5.06543	-3.19161	-5.84809
ENSG00000174748	RPL15	6.66267	6.62117	6.68007	6.67697	6.99248	7.13014	7.25416	6.4605	5.93994	6.25055	6.15127	6.352	6.27778	6.15187	6.38519	6.27301	6.09099	6.13086	6.22695	6.11835	5.96674
ENSG00000120057	SFRP5	6.65761	5.18235	5.54928	3.87615	4.52883	4.91904	5.99212	-4.45695	-4.25112	-3.90789	-4.55196	-3.49863	-5.28535	-3.82989	-4.17947	-5.92962	-7.62786	-5.58175	-5.91343	-4.62045	-5.00009
ENSG00000086758	HUWE1	6.64997	5.70372	5.97232	6.08918	6.41196	5.97681	6.09392	6.39262	6.40083	6.32325	5.9959	6.23147	6.11026	6.17677	6.26195	6.06556	6.74752	6.56641	6.29937	6.25175	5.79586
ENSG00000044574	HSPA5	6.64678	6.60495	6.55643	5.86765	5.97758	5.65187	5.96939	6.69611	6.4179	6.17983	6.67706	7.1681	6.71982	6.81066	6.30504	6.4315	6.15565	6.11687	5.48521	6.42872	5.87651
ENSG00000188157	AGRN	6.6455	5.70412	6.75894	7.12885	7.00293	6.73076	7.12298	4.94131	4.73391	4.76806	4.35993	3.94786	4.79471	4.17873	5.41025	5.15142	5.23342	4.86264	4.97059	4.89601	4.28711
ENSG00000143537	ADAM15	6.64422	6.48418	6.01645	6.4702	5.39239	5.43699	6.08375	6.38758	5.98746	6.37094	6.35184	6.30481	6.38903	5.92645	6.66837	6.63206	6.0007	6.00631	5.91193	6.47154	5.95822
ENSG00000174444	RPL4	6.64294	7.64385	6.49254	6.97566	6.86427	7.01324	7.26736	7.14611	6.95843	6.93063	6.8098	6.7103	7.03097	6.94177	6.9979	7.02403	7.13633	7.16009	7.09391	7.15208	7.09395
ENSG00000078401	EDN1	6.64165	7.34475	7.33848	7.40329	6.91616	7.23843	6.29234	5.74531	5.91397	5.15082	6.24633	5.68872	6.42355	6.42096	5.13916	4.76474	5.68828	6.02586	5.42942	5.94069	6.1462
ENSG00000128595	CALU	6.64101	6.34879	6.70847	6.65112	6.20241	6.44844	6.61946	6.40267	6.50889	6.6638	6.76777	6.89445	6.89416	6.69452	6.55008	6.32924	6.23816	6.407	6.34837	6.6567	6.5294
ENSG00000166341	DCHS1	6.6378	6.1911	6.17087	6.32085	6.43295	6.45037	6.26761	5.06246	4.90551	4.8293	5.05804	5.16213	5.14136	5.20665	5.12904	4.94817	4.8308	5.07199	4.92719	4.84197	4.57209
ENSG00000087274	ADD1	6.62617	5.87149	6.0263	6.36121	6.17535	5.98896	6.03026	5.67676	5.39197	5.65014	5.51607	5.7564	5.55126	5.40037	5.71988	5.50761	5.61338	5.49306	5.56362	5.46691	5.25323
ENSG00000103335	PIEZO1	6.61967	6.06045	6.15211	6.39227	5.67522	5.91487	6.00215	5.95232	5.95083	6.04485	5.97454	6.03303	6.12047	5.97047	6.15377	6.10872	6.11139	5.94914	6.10526	6.01805	5.64907
ENSG00000108298	RPL19	6.61837	7.26254	6.49466	6.93886	6.80993	6.94217	7.00763	6.91161	6.69506	6.7395	6.57252	6.51678	6.79865	6.72285	6.74722	6.74494	6.94679	6.76426	6.79043	6.89271	6.67062
ENSG00000142541	RPL13A	6.61772	7.99381	6.43679	7.07606	6.92336	7.19909	7.46552	7.10598	6.73909	6.74154	6.63436	6.34887	6.92022	6.7154	7.11448	7.15745	7.28348	7.28216	7.18187	7.11266	7.02255
ENSG00000062716	VMP1	6.61641	6.83052	7.13288	5.94358	6.02115	6.52319	6.57096	5.22546	5.48384	5.32812	5.27618	4.91862	5.23975	5.46672	5.26999	5.10541	5.53846	5.87347	5.32915	5.3031	5.91322
ENSG00000196411	EPHB4	6.61445	6.69458	6.30389	6.73535	6.29776	6.86269	6.65905	5.91748	5.75631	5.35998	5.69952	5.60952	6.0762	5.8672	6.18019	6.26298	5.63291	5.83473	5.99699	6.01819	5.5314
ENSG00000066056	TIE1	6.60724	6.65555	6.30793	6.7526	5.79196	6.40942	6.30147	7.03049	6.77728	6.80274	6.24489	6.16543	6.22435	6.41796	7.2147	7.35515	7.17854	7.00598	7.41723	6.67342	6.81623
ENSG00000144476	ACKR3	6.59536	7.83477	7.77931	8.47217	6.07641	6.97098	7.13616	3.29124	3.86411	4.6612	5.21641	4.64457	3.64243	3.26814	2.9585	2.5339	3.95663	2.73747	2.04193	1.86274	1.80009
ENSG00000087460	GNAS	6.59271	5.8871	6.56524	6.54283	6.88309	6.20553	6.26761	6.5514	6.1003	6.40264	6.06755	6.26932	6.02599	6.26137	6.62807	6.48374	6.67884	6.57224	6.49845	6.27197	6.0354
ENSG00000122786	CALD1	6.57401	6.80329	7.09643	6.701	6.84218	6.74605	7.09458	5.29701	5.22433	5.85443	6.06121	5.78908	5.6906	5.63132	5.54097	5.1904	5.28633	5.56863	5.02247	5.5366	6.03326
ENSG00000135926	TMBIM1	6.57333	6.49626	6.37264	7.17401	5.92885	6.14811	6.22611	5.20026	4.99036	5.21502	4.93297	4.90529	5.32026	5.22449	5.03653	4.59818	4.84356	4.47	4.66003	4.92213	4.80816
ENSG00000128591	FLNC	6.56929	5.88886	4.00206	5.51766	4.01802	4.49058	4.97491	5.98932	5.00324	5.52437	5.32949	5.30273	5.5212	5.61706	6.26912	6.04563	6.41251	6.15693	5.9482	6.19462	5.67479
ENSG00000136826	KLF4	6.56659	5.99974	7.98487	6.86338	6.68174	6.5156	6.73222	-2.13503	-1.84902	-0.413905	1.33068	1.27144	0.051953	0.36651	-0.985096	-1.03885	-1.25282	-1.63689	-1.82597	-0.805192	-1.90323
ENSG00000163453	IGFBP7	6.56659	7.65207	5.73723	6.30886	6.40855	6.71003	6.71671	4.76141	4.89245	4.88804	5.34437	4.85577	5.32158	4.70694	4.94723	4.72889	4.93175	4.94514	4.84129	5.02853	4.71244
ENSG00000111077	TNS2	6.55778	5.19438	6.53038	6.10166	5.77404	5.97146	5.54279	4.31013	4.16975	3.55427	3.91247	4.35133	3.94381	3.81733	4.49974	4.37682	3.9001	4.18212	4.55642	4.03584	3.48596
ENSG00000178726	THBD	6.55301	7.01055	6.89894	7.86098	6.81767	6.72396	7.69678	1.85088	2.82875	4.21416	4.67284	4.51658	3.49554	3.17686	2.63283	2.78577	2.42877	1.68316	2.32019	2.36473	2.53475
ENSG00000044115	CTNNA1	6.54822	6.9485	6.58669	7.15075	6.01936	6.38865	6.48432	6.58554	6.43576	6.64292	6.36765	6.39943	6.49736	6.5487	6.74116	6.56715	6.75861	6.76924	6.69034	6.60239	6.6039
ENSG00000106211	HSPB1	6.54548	6.01079	6.56456	7.15944	5.21458	5.64757	5.92411	5.91724	5.3868	5.59315	5.3148	5.32655	5.22936	5.45998	5.71523	5.58887	5.61188	5.36325	5.26511	5.27821	4.74194
ENSG00000174059	CD34	6.5448	5.06498	7.17641	7.09936	6.46617	6.65866	6.88725	3.24733	3.19538	4.522	3.81582	4.0372	3.41261	1.59638	3.63726	3.29357	3.89226	2.4126	3.2174	2.12309	2.85027
ENSG00000163399	ATP1A1	6.54411	6.61009	6.25868	6.63894	6.0274	5.98782	6.14804	6.45035	6.13921	6.21838	6.24633	6.73516	6.386	6.35837	6.42294	6.41569	6.22066	6.03948	6.1008	6.02181	5.74745
ENSG00000134531	EMP1	6.54067	6.59202	8.55107	6.94432	6.5985	6.66625	7.71177	6.74741	6.98053	7.57347	7.32238	7.33527	7.03613	7.45339	6.18626	6.35491	6.2341	5.92058	5.87145	6.80262	6.90968
ENSG00000152661	GJA1	6.53999	6.75364	6.99731	6.8225	5.75803	6.94334	7.19208	6.06497	6.09967	5.85775	5.88625	5.86174	5.96824	6.06604	6.4155	6.13456	5.75463	6.01136	6.36159	5.66912	6.56887
ENSG00000060237	WNK1	6.5393	4.95953	6.11846	6.56682	8.0235	5.68866	5.82634	5.1211	5.0582	5.30497	4.94367	5.39748	4.76819	4.92745	5.2173	4.96494	5.23729	5.04195	4.8928	4.7891	4.51276
ENSG00000169908	TM4SF1	6.53861	7.07206	7.35028	7.15346	6.70475	7.46872	7.44169	6.1511	6.03015	6.92631	6.3099	6.68677	5.9035	5.95812	6.08956	5.922	5.94401	6.04988	6.59461	6.00392	6.40428
ENSG00000071242	RPS6KA2	6.53792	6.03105	5.6199	6.31014	5.79196	6.34293	6.18161	4.61956	4.1369	4.91759	4.62988	4.66627	4.26512	3.85521	4.83111	4.62848	5.12514	4.99511	5.2265	4.25252	4.20258
ENSG00000153815	CMIP	6.53239	4.77353	5.85459	5.35489	5.65922	5.4812	5.09673	3.98368	3.65835	3.99458	3.92152	4.52136	3.75161	3.9449	3.91977	3.92056	4.13742	3.73611	3.98411	3.52342	2.99678
ENSG00000198034	RPS4X	6.52197	7.977	6.36646	6.69454	7.23535	6.62621	7.56292	6.60637	6.59269	6.49746	6.85855	6.1042	6.93386	7.0001	6.62893	6.52938	6.66324	7.18117	6.35177	7.01697	6.99572
ENSG00000164587	RPS14	6.52058	7.59565	6.529	6.92405	6.90069	6.89453	7.33701	6.84803	6.57509	6.66897	6.30973	6.02521	6.62952	6.54131	6.75461	6.63794	6.66697	6.54682	6.65941	6.67986	6.71115
ENSG00000200087	SNORA73B	6.51148	8.84632	6.13037	6.69983	7.46961	6.82548	6.30795	6.45751	6.03379	6.1269	6.39551	6.36179	6.42847	6.16418	6.49479	7.53488	7.28582	6.87003	7.14588	7.00943	7.40325
ENSG00000035403	VCL	6.50937	6.29874	6.1203	6.24973	6.2087	6.22075	6.31054	5.95585	6.04137	6.42861	6.62165	6.82474	6.57557	6.5164	6.41463	6.2162	6.31254	6.24106	6.21089	6.56771	6.24579
ENSG00000139644	TMBIM6	6.50161	7.06926	7.03729	7.31672	6.83914	6.88846	7.0219	6.24146	6.25795	6.49078	6.45483	6.37151	6.42834	6.22946	6.30488	6.20041	6.25869	6.24217	6.2304	6.39008	6.3832
ENSG00000231500	RPS18	6.50091	7.93401	6.51997	6.72828	6.95459	7.21518	7.43178	6.66062	6.58279	6.36084	6.47233	6.14239	6.60779	6.41543	6.58725	6.79382	6.63225	6.6838	6.83564	6.70273	6.67022
ENSG00000092841	MYL6	6.49737	7.67872	6.59993	6.61115	6.57432	6.55368	6.86631	7.11496	7.11981	7.14716	7.31072	7.06946	7.43444	7.34849	7.17863	7.26683	6.89662	6.75269	6.91498	7.37941	7.41896
ENSG00000112414	ADGRG6	6.49524	6.40876	7.80155	7.28684	7.53557	7.74163	7.11948	4.83025	4.80688	5.13777	5.90758	5.74556	5.06953	4.64016	4.91552	4.24489	4.66014	5.20664	5.42497	4.27273	3.9996
ENSG00000185567	AHNAK2	6.49239	4.64171	5.63927	5.54185	5.73641	5.96686	5.97225	5.10677	4.99783	5.13413	4.96527	4.79927	4.98828	5.12217	5.06791	4.9875	5.47198	5.09579	4.77919	5.45831	4.53021
ENSG00000150991	UBC	6.49026	7.18041	8.00443	7.28058	6.56638	6.58403	7.24219	6.46761	6.25115	6.18952	6.32481	6.28437	6.57845	6.5605	6.49669	6.21748	6.47091	6.31511	6.28385	6.58717	6.52505
ENSG00000175084	DES	6.48454	6.4774	5.19158	4.75609	5.30549	5.16912	4.38034	-4.45695	-4.73654	-4.64486	-5.39996	-3.98406	-8.09271	-7.73678	-4.70999	-7.51459	-7.62786	-5.09633	-5.06543	-4.414	-5.00009
ENSG00000166710	B2M	6.48025	7.88308	7.47125	8.05638	7.59954	7.42355	7.46523	5.78952	5.89081	6.40703	5.95087	5.78578	5.74817	5.59987	6.04258	5.95162	6.04511	5.9162	6.64015	5.66379	5.84706
ENSG00000156453	PCDH1	6.47809	6.44325	5.45184	6.4823	5.4533	5.38736	5.92917	6.00668	6.00071	5.47192	4.86378	4.57895	5.11049	5.33317	6.18693	5.75352	5.6455	6.03636	5.6002	5.66201	5.55269
ENSG00000198668	CALM1	6.47016	6.21238	6.73633	7.02922	6.239	6.83771	6.73367	6.64393	6.74576	7.04412	6.77628	6.62789	6.433	6.33611	6.8235	6.89394	6.43038	6.4994	6.66064	6.55289	6.98207
ENSG00000128918	ALDH1A2	6.46582	4.39009	5.97842	5.71432	5.40615	6.19999	5.33376	3.52984	3.25555	2.88998	3.53962	4.44137	4.06433	1.70824	3.11938	2.56623	2.11529	1.27374	2.60463	2.93709	0.325841
ENSG00000108691	CCL2	6.45783	7.19844	4.98095	5.85998	6.0274	5.55201	5.87605	2.2139	2.68468	3.06556	4.02337	2.59789	2.48567	1.53235	1.28248	0.640233	4.06519	2.28738	3.55865	0.319353	1.29147
ENSG00000112769	LAMA4	6.45564	6.36332	6.69557	6.4274	6.66066	6.74851	6.69857	6.89405	6.79181	7.116	6.36715	6.35557	6.29484	6.39259	7.41568	7.2324	7.47383	7.5484	7.50382	6.86943	6.84222
ENSG00000165757	JCAD	6.44097	5.76875	6.86313	6.57814	6.75077	6.81997	6.60189	4.36995	4.10203	4.27102	4.14269	4.08526	2.78611	3.49744	4.53504	4.15828	3.94342	3.88626	4.20733	3.50923	4.11856
ENSG00000251322	SHANK3	6.44023	4.08388	5.87217	5.33288	5.38129	5.38449	5.22765	4.99265	4.86968	4.69326	4.15117	4.82136	4.29558	4.8919	5.10254	5.40111	5.30491	4.73226	4.52349	4.74873	4.29581
ENSG00000198467	TPM2	6.43654	6.80814	5.61338	6.07176	5.99225	5.93267	6.37402	5.14151	5.14212	5.18116	5.61532	5.2832	5.64465	5.33753	5.09037	4.84049	4.98477	5.17163	4.78232	5.30653	4.99975
ENSG00000162591	MEGF6	6.42689	5.87683	6.74827	6.73038	6.28887	6.50665	7.03798	3.17967	2.67793	3.44907	4.08345	3.73977	4.04717	3.43252	3.77159	3.71963	3.25095	4.20059	4.70954	3.72998	3.07732
ENSG00000140575	IQGAP1	6.42241	6.71381	6.66817	6.67578	6.70697	6.49312	6.63037	6.36154	6.49312	6.63275	6.43269	6.352	6.5334	6.38322	6.42551	6.21748	6.47911	6.5284	6.51822	6.54102	6.44061
ENSG00000172889	EGFL7	6.42241	6.57745	6.79566	6.56553	5.70112	6.41027	6.35661	7.13431	7.03189	7.03945	6.56647	6.30065	6.87502	6.78868	7.15019	7.15579	7.27003	7.27206	7.16982	7.15151	6.85448
ENSG00000114861	FOXP1	6.41942	5.7413	6.67444	6.65758	6.0451	6.43185	6.33169	4.36712	4.28527	4.71391	4.56091	4.89061	4.38328	4.1138	4.58335	4.33365	4.37671	4.11765	4.52099	4.10511	3.93622
ENSG00000158710	TAGLN2	6.41867	6.85128	6.13675	6.94729	5.78671	6.02001	6.20646	6.50795	6.37394	6.46852	6.43601	6.55646	6.48218	6.54015	6.46348	6.37368	6.32224	5.83642	5.81831	6.37884	6.22398
ENSG00000214548	MEG3	6.41192	4.99663	6.90322	6.2417	5.16527	5.41295	5.33757	5.56341	5.51872	5.46613	4.49577	4.40051	5.39174	5.0836	5.9142	5.91548	6.45187	6.04587	6.36786	5.57402	4.94714
ENSG00000169418	NPR1	6.40664	6.35033	6.20334	6.37988	5.57402	6.16695	6.34971	2.23885	2.50568	3.12846	4.01155	4.22832	3.30229	3.03389	2.08443	2.5257	0.0516167	1.44283	2.86333	1.69173	0.987333
ENSG00000174231	PRPF8	6.40664	5.28286	5.97842	5.95705	6.21184	5.6765	5.79114	6.48336	6.35688	6.36147	6.03561	6.60522	5.98753	6.35953	6.23602	6.18986	6.46332	5.98478	5.6403	6.1464	5.58519
ENSG00000129422	MTUS1	6.40059	5.35913	6.43087	5.38049	5.67522	6.01778	5.72533	5.49676	5.29495	5.10575	5.1238	5.54146	4.96579	4.33636	5.57785	5.6084	5.06192	5.42766	5.59169	4.78158	4.49377
ENSG00000144713	RPL32	6.39603	7.19645	6.04191	6.76909	6.56515	6.48107	6.59846	6.79486	6.45932	6.68724	6.28084	6.19759	6.47103	6.4227	6.62199	6.33061	6.53649	6.28961	6.42837	6.48036	6.13655
ENSG00000090339	ICAM1	6.38764	6.81446	6.92706	5.99769	4.93408	5.30532	5.93839	0.0804798	-0.37197	-0.135305	2.038	1.14522	0.57618	0.607518	0.490773	-0.885229	0.547062	-0.238345	0.42642	-0.853286	-1.2752
ENSG00000168497	CAVIN2	6.38534	6.06981	7.32458	6.64788	6.31901	7.35303	6.63398	5.01765	4.9263	4.96596	5.41302	5.3329	5.17744	4.2713	5.33243	5.45498	5.11002	5.34825	6.00148	4.93576	5.00132
ENSG00000050165	DKK3	6.38381	5.60248	8.00542	7.96207	5.90288	7.0514	8.29451	4.29236	3.68215	4.06748	4.14036	3.82715	2.89811	3.68896	5.30388	4.65815	4.55236	4.34751	4.3592	3.35815	4.10057
ENSG00000140945	CDH13	6.38304	4.21898	5.14716	4.67647	3.44998	5.55865	5.00793	4.75871	3.09508	2.19784	4.00305	3.97826	3.09155	3.07299	5.29454	4.07834	2.3679	4.09949	4.58502	2.91093	3.66801
ENSG00000165507	DEPP1	6.37534	8.66779	8.94877	9.40328	6.2985	7.61615	7.73793	6.33863	5.69035	5.77872	5.0465	4.03498	4.28478	2.83403	6.69687	6.58911	6.10144	5.89469	7.04943	4.5431	4.83263
ENSG00000148400	NOTCH1	6.37457	5.97106	6.0263	5.97396	6.30071	6.10236	5.815	6.24397	6.03015	5.76465	5.33323	5.48069	5.30189	5.34354	6.24816	6.058	6.38048	6.30828	6.26056	5.60383	5.28929
ENSG00000117318	ID3	6.37148	6.03901	5.78903	5.66551	6.26868	6.21559	5.88085	4.81165	4.6622	4.31932	4.31943	4.12551	4.76119	4.80601	5.15883	4.8629	4.9236	5.01052	4.88989	4.69991	4.5423
ENSG00000101335	MYL9	6.36605	6.42733	5.41635	5.61208	6.16243	5.82495	5.97429	2.13633	2.58719	3.38795	3.58816	3.63212	3.0791	3.01225	1.99199	1.8096	1.93247	1.80885	1.84279	2.61942	1.60313
ENSG00000134107	BHLHE40	6.3645	7.5775	8.94293	7.82639	7.25791	7.46029	7.83708	2.99792	2.69809	3.24524	1.91655	2.50458	1.69029	2.25616	3.02622	2.8286	3.2371	2.79589	2.21069	2.25559	2.47654
ENSG00000009307	CSDE1	6.34965	6.94866	6.88656	6.7769	7.03561	6.93021	6.98374	6.50939	6.52778	6.52708	6.52997	6.48579	6.66088	6.49362	6.60157	6.56731	6.5335	6.84394	6.73865	6.73027	6.74432
ENSG00000084234	APLP2	6.34729	6.71976	6.70234	6.91498	6.48962	6.75786	6.72473	7.44764	6.58324	6.98596	6.31969	6.28156	6.7693	6.88693	7.6652	7.45377	7.55247	7.51822	7.52845	7.2294	7.29635
ENSG00000142949	PTPRF	6.34729	5.19723	5.99956	6.02072	5.78039	5.92716	5.96325	5.93477	5.88606	5.98824	6.2273	6.19062	5.90544	6.00732	6.114	5.9419	6.18702	5.92693	5.46519	5.84833	5.32422
ENSG00000109046	WSB1	6.34098	5.88921	7.30612	6.13529	6.05036	6.60194	6.30504	5.347	5.4466	5.58409	5.99268	5.32564	5.53972	4.9973	6.06416	5.87384	5.84267	6.32777	6.86041	5.22008	5.43859
ENSG00000127481	UBR4	6.3394	5.29621	5.61599	5.58058	6.10453	5.36131	5.61149	5.62001	5.81247	5.59394	5.17804	5.38706	5.34933	5.48133	5.58093	5.46752	6.12211	5.79795	5.63684	5.53932	5.02058
ENSG00000198712	MT-CO2	6.3394	2.87985	5.81311	6.07327	5.69441	5.19492	4.93609	6.25662	6.63774	6.87013	5.88648	7.16911	6.00376	6.46894	5.66227	5.87545	6.26269	4.90025	5.84887	5.73837	5.1322
ENSG00000067082	KLF6	6.33861	5.73347	6.93753	5.24612	5.47435	5.63216	5.52565	5.22194	5.01064	5.23353	5.03821	5.37217	4.43061	4.98282	5.01054	5.3006	4.77648	4.27218	4.00155	4.10878	3.88493
ENSG00000142676	RPL11	6.33226	7.43392	6.35244	6.93372	6.44766	6.7082	6.92801	6.86866	6.8845	6.70344	6.39957	6.11792	6.75899	6.73267	6.68608	6.62072	6.80709	6.76559	6.68234	6.70013	6.51873
ENSG00000075426	FOSL2	6.32589	7.02297	7.36199	7.36288	6.37675	7.08344	7.64523	4.35932	4.5677	4.7477	5.01937	4.77016	4.65905	4.64125	4.31822	4.37454	4.5598	4.1431	4.31707	4.51496	4.58717
ENSG00000198795	ZNF521	6.31547	5.14329	6.39028	6.0072	6.64855	6.1345	6.09392	4.40275	3.99342	4.38887	3.79036	3.85514	3.48897	3.61692	4.67203	4.62273	4.61382	4.67681	4.82854	4.10878	4.0657
ENSG00000168385	43345	6.31305	5.99843	6.38647	6.5151	5.95717	6.36932	6.33582	6.26917	6.07932	6.24024	6.153	6.31492	6.21855	6.00648	6.37194	6.28196	6.15646	6.0927	6.25041	6.15389	6.2639
ENSG00000154133	ROBO4	6.31063	6.11239	5.75628	5.78715	5.83736	5.64757	6.09916	6.85738	6.45044	6.39337	6.02934	5.80678	5.78256	6.22621	6.6415	6.33765	6.48449	6.32401	6.15528	6.5574	6.45849
ENSG00000166741	NNMT	6.31063	7.84598	6.89357	6.99793	6.56761	6.8223	7.13434	4.19848	3.87448	4.05211	4.83054	4.19883	4.87578	4.45336	4.03783	3.58936	4.03079	4.25461	4.05668	4.63167	4.35771
ENSG00000143761	ARF1	6.30902	6.34674	5.84239	6.34755	6.17615	5.94559	6.01884	6.60412	6.08507	6.25307	6.23766	6.50759	6.34537	6.43463	6.41707	6.1729	6.39528	6.18817	6.04853	6.27757	6.08892
ENSG00000089157	RPLP0	6.30659	7.79828	5.96722	6.80188	6.414	6.6539	7.07323	7.32089	7.19161	7.14436	6.96784	6.70646	7.29938	7.12659	7.12689	7.11323	7.32556	7.13451	7.09524	7.30753	7.09637
ENSG00000164125	FAM198B	6.30659	5.91367	7.02261	6.00909	6.18815	6.75141	6.01489	4.31086	4.3881	3.94052	4.86706	4.9915	4.66905	3.64097	4.44117	4.61438	3.81456	4.27467	5.2165	3.78141	4.61687
ENSG00000159403	C1R	6.30254	6.91445	5.00902	5.32884	5.38407	5.07394	3.79137	-1.25184	-0.868646	-1.79242	0.657492	-0.0771687	-0.344512	-2.31051	-2.52236	-2.22918	-1.69713	-0.826865	-0.500649	-1.57942	-3.52616
ENSG00000010278	CD9	6.3001	5.32671	5.81311	6.26804	4.71501	6.02222	5.85894	6.30377	5.67603	5.80119	6.24759	6.55102	7.20582	6.60939	6.4096	5.97288	5.5328	5.89732	5.89963	6.582	6.02497
ENSG00000162407	PLPP3	6.29929	6.0504	6.16018	6.80261	5.85151	6.257	6.12068	3.13218	3.30894	3.63591	3.80412	4.61064	3.39161	3.68476	3.84843	3.86425	2.80154	2.72841	3.19562	3.12567	3.13662
ENSG00000186716	BCR	6.2944	6.45687	5.43568	6.20774	5.17173	5.74258	5.59621	5.36659	5.05625	5.21191	4.98957	4.87081	5.1914	5.16692	5.53833	5.32285	5.41499	5.39051	5.37301	5.18107	4.88103
ENSG00000142937	RPS8	6.29359	7.46416	6.12213	6.68153	6.59068	6.74985	6.90189	6.63544	6.30908	6.30893	6.24399	5.94224	6.54046	6.37932	6.37548	6.44442	6.68877	6.4717	6.57356	6.6329	6.48087
ENSG00000182871	COL18A1	6.2895	6.81391	5.75864	6.10432	5.86452	6.43629	6.4519	6.05293	5.96511	5.73944	5.09169	4.67629	5.3558	5.46672	7.1159	7.48863	6.68976	7.17393	6.98014	6.1744	6.19433
ENSG00000135821	GLUL	6.28622	7.24379	6.29333	7.68977	7.71929	6.0659	6.64657	5.08414	5.02468	5.41298	5.35175	5.63175	5.37579	5.09789	4.8605	4.7872	4.88759	4.98981	5.07312	5.0551	4.89288
ENSG00000067225	PKM	6.28539	6.84512	5.66723	6.40335	5.72108	5.44858	5.80633	8.4133	8.22588	8.39126	7.69916	7.87664	8.0115	7.99106	8.22073	8.0441	8.18469	7.82506	7.71467	7.96853	7.81541
ENSG00000121898	CPXM2	6.28375	5.74012	6.67444	6.34955	6.20399	5.9409	6.18197	-0.593456	2.10895	3.31514	3.31772	3.72606	3.1451	2.17161	-2.83552	0.0167962	-0.226984	-1.46074	-1.44094	0.900695	-1.45577
ENSG00000100906	NFKBIA	6.28211	7.93742	7.37823	6.96203	5.84546	5.50414	6.71647	3.09336	2.82264	2.74076	3.36226	3.36112	3.48047	3.1451	3.00654	2.85064	3.0187	2.99492	3.18828	2.72419	2.41213
ENSG00000129353	SLC44A2	6.28211	5.45222	6.77538	6.8375	6.82793	6.18654	6.61005	4.41717	3.9907	4.40287	4.71717	5.09436	4.3127	4.23584	4.37659	4.42903	4.23748	4.13421	4.51681	3.97402	3.72215
ENSG00000177697	CD151	6.27468	6.66751	5.6735	6.33275	5.38268	5.63892	6.18408	5.98587	5.55693	5.80761	6.13813	5.49208	5.99799	6.30907	6.13716	5.91129	5.77661	6.03544	5.63645	6.1739	6.21565
ENSG00000173821	RNF213	6.27302	5.58475	5.80627	6.29158	6.40512	5.99123	5.87867	5.01855	4.96355	5.27748	4.58674	4.89797	4.80873	4.88779	5.20871	4.79233	6.0824	5.68959	5.71747	4.94604	4.74792
ENSG00000114867	EIF4G1	6.27136	6.04819	6.01448	6.31398	5.6302	5.64421	5.90927	7.0141	7.05925	6.91924	6.87715	7.09982	7.14245	7.23139	6.84657	6.7706	6.98172	6.67298	6.52759	7.04266	6.84161
ENSG00000132475	H3F3B	6.27136	7.38228	7.29231	7.16427	6.42688	6.96523	7.06847	5.15469	5.20685	4.88153	5.30031	5.06306	5.40402	5.3833	5.0828	4.94408	4.86023	5.25066	4.79134	5.36133	5.69253
ENSG00000126785	RHOJ	6.27053	4.05528	4.60092	4.70792	4.30916	4.32312	4.23413	5.09529	4.71673	4.65511	4.67338	5.30088	4.601	4.51618	5.32695	5.27719	4.66129	4.37854	4.30259	4.43337	3.88425
ENSG00000127528	KLF2	6.26804	4.05528	7.43439	6.0338	6.6902	5.89442	5.54334	1.0349	0.039562	0.704851	0.492433	2.18185	0.792991	1.52766	1.90636	2.50639	1.1633	0.0678628	-0.121616	1.18492	0.252051
ENSG00000067560	RHOA	6.26638	6.14374	6.36568	6.63465	6.04334	6.03437	6.26695	6.53842	6.25512	6.49944	6.25208	6.52274	6.30891	6.39049	6.40238	6.49358	6.26364	6.14659	6.07717	6.25789	6.1005
ENSG00000082641	NFE2L1	6.26305	5.84775	6.04772	5.97525	5.67636	5.74482	5.92496	5.86309	5.47072	5.59792	5.46159	5.60578	5.28627	5.60904	5.93797	5.73941	5.54597	5.46959	5.48243	5.25382	5.14952
ENSG00000140511	HAPLN3	6.26221	7.20468	5.95593	6.3828	5.69889	6.00438	6.33487	1.56047	1.46901	1.50489	2.02463	1.52056	1.86004	1.91965	1.89652	2.31672	1.23322	2.00471	2.00901	2.43483	2.06241
ENSG00000196230	TUBB	6.24964	6.1277	6.38034	6.68785	6.1346	6.11938	6.19602	7.50462	7.61147	7.69502	7.57607	7.92546	7.59437	7.66906	7.34005	7.37943	7.42041	6.90372	6.86846	7.71195	7.52181
ENSG00000038427	VCAN	6.2488	8.40541	4.29048	5.77866	6.62639	5.57184	7.37162	-2.20061	-1.63221	1.03384	0.781939	-0.948435	-0.331154	1.34803	-2.45365	-1.36484	-1.89994	-2.17576	-3.98743	-0.758649	-2.23928
ENSG00000140443	IGF1R	6.2378	5.34276	5.88737	5.48672	6.39688	6.1403	6.36906	4.03801	3.66177	3.78094	3.81485	3.95493	3.60035	3.46596	3.95495	3.9392	4.04146	3.89439	4.19326	3.50764	3.38793
ENSG00000149257	SERPINH1	6.23185	7.13433	5.75628	6.01853	5.70001	5.9311	5.64465	6.53007	6.24602	5.78059	6.12351	6.21439	6.39871	6.25625	6.58406	6.18184	5.69674	5.84943	6.08156	6.3862	5.99654
ENSG00000072163	LIMS2	6.22072	4.66659	6.12854	5.96683	5.20831	5.70394	5.22354	1.7152	0.842397	2.28719	3.06846	3.64092	2.61552	2.37566	1.93547	1.58081	0.81922	1.28367	1.20551	1.37085	0.433613
ENSG00000140105	WARS	6.219	5.6394	5.77975	6.76742	4.95295	5.53554	5.45905	4.706	4.86374	5.24067	5.19156	5.32655	4.98093	4.52267	4.54871	4.16445	4.79657	4.7552	5.03742	4.37281	4.04157
ENSG00000196526	AFAP1	6.219	6.19993	6.23849	6.93472	5.73967	6.13894	6.16135	5.12822	5.0973	4.99759	5.65492	5.6192	6.09008	5.44298	5.14644	4.87907	5.34206	5.17863	4.92183	5.80024	4.83192
ENSG00000081041	CXCL2	6.20865	6.58443	5.99956	6.52374	7.25144	6.75052	6.22577	0.0942199	-0.344225	0.889119	1.19399	1.78677	0.554753	-0.100154	-1.05974	-1.36484	0.624802	-0.502801	1.21379	-0.420025	-0.654314
ENSG00000182809	CRIP2	6.20778	5.79607	5.90028	6.53759	5.20202	5.88592	5.80999	5.12278	4.76927	4.93571	4.56438	4.35846	4.72648	5.13455	5.54333	5.4557	5.17364	5.18891	5.21907	5.10393	4.97321
ENSG00000172403	SYNPO2	6.20518	6.04819	5.8368	5.32884	6.48768	6.52762	6.14876	-3.23456	-5.47351	-3.0599	-2.29562	-3.13606	-3.84478	-3.09292	-2.59451	-5.19266	-3.37994	-3.38012	-2.56293	-2.89463	-3.92209
ENSG00000088387	DOCK9	6.2017	6.01886	6.73753	6.93006	5.84344	6.52996	6.60716	5.59576	5.70412	5.71745	5.37038	5.20626	5.14406	5.14146	5.57374	5.34203	5.67177	5.68562	5.87635	5.27168	5.45923
ENSG00000142173	COL6A2	6.19821	6.84694	5.77858	5.74684	5.36306	5.80834	6.58864	1.07702	2.20127	2.39589	2.97421	1.86894	1.44839	2.43939	-0.287457	0.233608	-0.969652	0.271245	0.323063	0.417201	-0.221647
ENSG00000149591	TAGLN	6.19734	7.58535	5.35361	5.49621	5.88923	6.07945	6.63862	0.378745	-0.0697854	0.788842	3.09109	2.76279	1.381	1.02809	-0.228862	-0.94473	-0.998507	-1.52864	-1.29284	-0.00347912	-0.490534
ENSG00000135862	LAMC1	6.19122	6.55052	5.83007	6.12543	6.08414	6.1626	6.36067	6.7421	6.62398	7.07885	6.29152	6.50639	6.3682	6.41891	7.36857	7.27204	7.49079	7.4637	7.46922	6.85438	6.70281
ENSG00000154783	FGD5	6.19122	5.50744	6.39333	6.59484	5.66839	6.07839	6.19217	5.22037	5.0935	5.33035	5.00241	5.18436	4.96951	4.89554	5.29704	5.67663	5.46043	5.26671	5.48969	4.96956	4.97608
ENSG00000136830	FAM129B	6.18595	6.61372	5.4822	6.00814	5.19727	5.5894	5.83579	6.43711	6.61627	6.51746	6.15319	5.8792	6.25512	6.38338	6.64432	6.97256	6.79637	6.6921	6.29852	6.72874	6.82235
ENSG00000104805	NUCB1	6.1833	6.64849	6.33907	6.51555	6.29184	6.20064	6.31409	4.9217	4.68004	5.12608	4.7301	4.25339	4.71485	4.70175	5.44694	5.27271	5.20759	5.27638	5.20823	4.85232	4.63149
ENSG00000148303	RPL7A	6.18154	7.17868	6.16286	6.5474	6.47664	6.58052	6.92337	6.87676	6.84795	6.61782	6.562	6.28249	6.85233	6.61451	6.80379	6.71851	6.85551	6.82334	6.70004	6.73257	6.6651
ENSG00000110651	CD81	6.17269	5.03727	6.49679	6.12892	5.90966	5.85181	6.07618	4.91398	4.81766	4.71587	4.79209	5.13124	4.39035	4.72955	4.71604	5.19902	4.60186	4.32062	4.33093	4.60336	4.25756
ENSG00000075420	FNDC3B	6.1718	5.8672	6.07738	6.07779	5.9553	5.87	5.80174	5.96195	5.728	5.20602	5.45507	5.67736	5.54901	5.62174	6.0874	5.53849	5.27734	5.48205	5.44049	5.51091	5.43489
ENSG00000170776	AKAP13	6.16735	5.5175	5.59101	5.67786	5.26529	5.35662	5.47987	4.61719	4.38603	4.38335	4.06234	4.17682	3.80173	4.33636	4.79582	4.5356	4.6904	4.79914	4.72446	4.20487	4.36745
ENSG00000136156	ITM2B	6.16288	5.71649	6.96287	6.65254	6.56086	6.47919	6.60031	4.48393	4.0389	4.47379	4.63319	4.5713	4.24742	4.15006	4.76101	4.6118	4.01825	4.442	4.83929	3.8797	4.3009
ENSG00000162734	PEA15	6.1602	5.21589	6.13766	5.92697	5.73423	5.40787	5.55156	5.64968	5.43363	5.67719	5.63333	6.28904	5.46344	5.70448	5.59265	5.38911	5.05798	4.60832	4.46443	5.28216	4.99033
ENSG00000133687	TMTC1	6.15121	6.01014	7.09783	6.52573	5.90966	6.54444	5.98526	1.12466	1.04482	1.99418	3.94833	3.9455	3.66427	2.42435	0.159005	-1.89988	-0.389459	-0.341438	0.0173073	1.13238	-0.857131
ENSG00000152601	MBNL1	6.14489	6.0911	6.31116	6.41459	6.01936	6.07661	6.09092	5.88944	6.25143	6.4468	6.23385	6.30157	6.13829	5.96702	5.82583	5.73438	6.02442	6.08136	6.2772	6.12121	6.29855
ENSG00000100243	CYB5R3	6.13945	4.7143	5.65712	5.9613	5.5982	5.63022	5.33249	5.10847	4.8719	5.42287	4.81509	5.65293	4.84375	5.00995	5.08352	4.85256	4.94933	4.36749	4.90179	4.5948	4.22846
ENSG00000140526	ABHD2	6.13672	5.13619	4.97283	5.86765	5.41706	5.71724	5.78604	3.77133	3.70889	3.94718	4.24642	4.48436	4.27061	4.37859	3.91977	3.7268	3.67306	3.65999	3.56918	4.10721	3.86375
ENSG00000160710	ADAR	6.1349	5.26831	5.86011	6.45151	6.02383	5.9553	5.95625	5.63007	5.36701	5.50249	5.44129	5.83708	5.3648	5.48617	5.48654	5.43433	5.67549	5.52533	5.38704	5.46282	5.17913
ENSG00000143322	ABL2	6.13307	5.59689	5.33789	5.61416	5.04201	5.74258	5.35895	5.52556	5.56701	5.22225	5.39592	5.03553	5.20665	5.55597	5.59923	5.32914	5.54034	5.5913	5.2733	5.6864	5.71005
ENSG00000024422	EHD2	6.13125	4.43615	5.61077	5.64169	5.03317	5.11402	4.98465	5.36305	5.37485	5.59845	5.08889	5.94579	4.87578	4.98624	5.44806	5.50865	5.4242	5.09403	5.36676	4.89328	4.46457
ENSG00000071127	WDR1	6.12575	6.26356	6.01546	6.16108	5.78987	5.94598	6.16707	6.79735	6.58144	6.73121	6.69972	6.7955	6.66182	6.88281	6.75393	6.77824	6.73648	6.30889	6.19241	6.71987	6.33722
ENSG00000134294	SLC38A2	6.11931	6.20305	7.27177	5.59579	6.45363	6.69389	6.80782	5.52968	5.89008	5.55686	6.09939	6.31033	6.57955	6.42993	5.58016	5.57371	5.24154	5.87327	5.98962	6.16425	6.50191
ENSG00000135046	ANXA1	6.11839	6.36027	6.96696	6.18948	5.69553	6.22493	6.2394	6.08983	6.16839	6.39809	6.77864	6.66645	6.8537	6.37525	5.68745	5.7326	5.85885	5.72716	6.02019	6.48802	6.37042
ENSG00000168807	SNTB2	6.11839	5.48523	6.49679	5.86696	5.70336	6.5664	6.14949	4.98022	5.05103	5.30982	5.14133	5.35445	5.10865	5.17443	4.92925	4.83939	4.94223	4.76985	4.76658	4.92718	5.0978
ENSG00000197756	RPL37A	6.1147	7.35537	6.01744	6.4248	6.41264	6.75341	6.95594	6.67569	6.48299	6.44223	6.63422	6.30481	6.73964	6.55691	6.5413	6.61655	6.7041	6.72129	6.76178	6.92878	6.86818
ENSG00000063177	RPL18	6.11377	7.0086	5.76923	6.58704	6.34995	6.44376	6.68444	6.79262	6.61362	6.47804	6.34815	6.00945	6.71259	6.55978	6.64689	6.63318	6.70648	6.70786	6.67496	6.69282	6.49848
ENSG00000117523	PRRC2C	6.11377	4.73562	6.04579	5.66551	5.85452	5.42082	5.22011	5.54976	5.86281	5.60267	5.24191	5.91771	5.15181	5.43581	5.32359	5.32087	5.52585	5.21412	5.03362	5.21669	4.58925
ENSG00000122406	RPL5	6.10728	7.061	6.19464	6.2662	6.26943	6.57247	6.523	6.48091	6.45858	6.37681	6.3726	6.33494	6.56846	6.33108	6.31215	6.4417	6.39961	6.51279	6.50869	6.53966	6.45198
ENSG00000001617	SEMA3F	6.10542	5.18005	5.85238	6.26276	5.65922	5.53347	5.95913	4.75331	4.33438	5.07871	4.89259	5.70489	5.10251	4.67606	5.13079	4.90406	4.77914	4.30425	4.16312	5.16028	4.4835
ENSG00000159140	SON	6.10356	5.05998	6.18852	5.7476	6.1689	5.80189	5.82634	5.57509	5.46827	5.26886	5.45163	5.98605	5.15596	5.36438	5.51388	5.59345	5.48278	5.07485	4.85293	5.25051	4.76754
ENSG00000197879	MYO1C	6.09796	5.36624	6.08211	5.94523	5.24858	5.59786	5.50774	5.87831	5.77896	5.92616	6.17454	6.40159	5.99285	6.04017	5.86355	5.75702	5.81832	5.68421	5.70431	5.72017	5.27202
ENSG00000120318	ARAP3	6.09703	5.22987	5.89061	5.42752	5.35882	5.58491	5.17045	5.29997	4.93057	4.64337	4.0607	4.30042	4.27934	4.62379	5.31868	5.1349	5.28147	5.42485	5.03713	4.75107	4.68388
ENSG00000168077	SCARA3	6.09609	5.93976	5.97028	7.01201	5.40066	5.98214	6.43274	4.28638	4.14793	5.25383	5.10962	5.23753	4.22668	4.32088	4.89714	4.67863	4.60366	4.44974	4.96784	4.2392	4.0657
ENSG00000182158	CREB3L2	6.0914	4.31023	5.73122	5.63598	5.74942	5.60873	5.71902	4.54148	4.52696	4.62531	4.33306	5.16721	4.38429	4.3397	4.4213	4.5233	4.53043	4.27093	4.32521	4.31188	3.88425
ENSG00000030582	GRN	6.08952	6.53596	5.95799	6.4165	6.00768	5.56171	6.21201	5.31105	4.7525	5.31948	4.86519	4.57589	4.63458	4.71829	6.00454	5.80579	5.63585	5.75464	5.90027	4.98873	4.85564
ENSG00000163110	PDLIM5	6.08292	6.15785	6.52206	6.57835	6.20241	6.49711	6.53466	5.03066	5.33197	5.16518	5.85188	5.81133	5.82457	5.68252	4.95396	4.7277	4.97924	5.07127	5.11793	5.50853	5.41858
ENSG00000089597	GANAB	6.08008	6.17587	6.11753	5.98234	6.02205	6.00998	6.19006	6.23003	5.8561	6.04057	5.87255	6.05951	6.0336	5.98507	6.2509	6.35279	6.23816	6.14251	6.22042	6.14129	6.02881
ENSG00000157554	ERG	6.06963	5.19609	5.9774	6.19281	5.46518	5.81944	5.55211	5.52176	5.28388	5.60583	5.15405	5.33018	4.98461	5.12605	5.58756	5.29136	5.45345	5.32198	5.50474	5.37074	5.23073
ENSG00000167526	RPL13	6.06867	7.00471	5.80513	6.31449	6.28813	6.5483	6.79472	6.08339	5.95503	5.7915	5.78082	5.49208	6.05791	6.03192	6.09262	6.37653	6.27536	6.27631	6.29194	6.28673	6.18637
ENSG00000153187	HNRNPU	6.06676	6.12441	6.62865	5.7604	5.86751	6.06518	6.14949	6.07865	6.46937	6.14005	6.6258	6.60109	6.60876	6.50275	5.92068	6.3017	5.92276	6.15456	6.13403	6.53305	6.6396
ENSG00000108175	ZMIZ1	6.06581	4.29222	5.66597	5.69836	5.73532	5.38161	5.25475	3.79045	3.71714	4.04901	3.77147	4.58199	3.47097	3.88298	3.60138	3.74692	3.77355	3.63402	3.81823	3.65101	3.08914
ENSG00000061273	HDAC7	6.06293	5.25852	5.7971	5.76415	5.26227	5.63651	5.34956	5.26243	4.99172	4.88066	4.94189	4.97652	5.00516	5.09156	5.30976	5.20073	5.25497	5.21022	5.15602	5.16154	4.95427
ENSG00000170004	CHD3	6.06198	5.53608	5.7994	5.72511	5.9164	5.94948	5.8331	5.53881	5.39557	5.32269	5.18744	5.01763	5.17364	5.48858	5.72568	5.76807	5.70375	5.64911	5.58133	5.28493	5.23473
ENSG00000078369	GNB1	6.06102	5.18866	5.56558	5.82635	5.58978	5.46824	5.55865	6.31994	5.85049	6.15882	6.02913	6.50679	5.87118	6.21587	6.22034	6.25577	5.96704	5.44878	5.22164	5.79147	5.33443
ENSG00000185624	P4HB	6.05717	6.58921	5.96824	6.12485	5.65116	5.78936	5.95625	6.8816	6.77155	6.78426	6.6662	6.76397	6.91629	6.68995	6.94549	6.88289	6.99173	6.71877	6.83296	6.86503	6.63073
ENSG00000103034	NDRG4	6.03975	4.80525	5.82557	5.65021	5.23939	5.84515	5.78604	2.45127	2.67793	2.49696	4.40579	4.33516	4.0931	3.12663	2.45882	3.52365	2.09153	3.00246	3.095	3.19135	2.31279
ENSG00000131477	RAMP2	6.02605	4.19181	5.76689	6.02821	5.44666	5.47258	5.66348	-0.708016	-0.791684	-0.207455	0.391856	1.22539	-0.973764	-0.236932	0.525227	0.206514	-1.0887	-0.485828	-0.163896	-1.55271	-0.718803
ENSG00000157168	NRG1	6.02211	4.9062	6.91916	5.61	7.09925	6.97175	6.82668	3.40172	4.2436	4.04901	5.09769	5.2462	5.2288	5.0254	2.96479	3.6857	4.22115	4.08394	3.44544	4.37803	3.90647
ENSG00000131389	SLC6A6	6.02113	3.27453	3.65649	5.24291	5.26981	4.52749	4.84184	3.55116	3.2001	3.89301	2.7508	2.75741	3.00203	3.2455	3.29064	3.24447	4.06082	3.25177	3.13696	3.3739	3.20231
ENSG00000118971	CCND2	6.01321	5.54818	6.25533	6.59652	6.33851	6.08477	6.73823	4.14996	4.93977	5.45186	4.993	5.26339	5.04765	4.77374	3.69515	3.2428	4.14734	2.5403	2.5237	2.50486	3.19467
ENSG00000090863	GLG1	6.01024	5.9401	5.69465	5.94325	6.19609	6.03217	6.13825	5.53661	5.30703	5.45945	5.23358	5.42491	5.33579	5.36241	5.69834	5.74736	5.77821	5.90257	5.70981	5.66646	5.46808
ENSG00000139318	DUSP6	6.00924	7.15484	7.36587	5.7794	5.8695	6.25637	6.13825	5.25634	5.39351	5.23251	4.60539	4.88815	4.72208	4.73261	5.40448	5.22076	4.98708	4.95915	5.33793	4.5989	4.9697
ENSG00000197321	SVIL	5.99826	5.54012	5.02679	4.82939	5.43194	5.09306	5.22148	5.03823	4.77165	5.08891	4.12321	4.26292	3.82205	4.23728	5.12167	5.02675	5.16228	4.83926	4.71137	4.50784	4.59672
ENSG00000196914	ARHGEF12	5.99525	5.64484	5.90135	6.13327	6.86875	6.07091	6.03769	5.65577	5.42257	5.63191	5.53358	5.63836	5.55936	5.58923	5.72568	5.47641	5.64491	5.81282	5.76209	5.6303	5.70122
ENSG00000002586	CD99	5.99424	4.64755	5.55609	5.83919	5.25163	5.73899	5.20421	5.58394	5.22838	5.60162	4.70412	5.12603	4.79432	4.80794	5.80866	5.68033	5.67577	5.37897	5.54692	5.14174	5.00538
ENSG00000058262	SEC61A1	5.99223	5.88357	5.47503	5.84379	5.38685	5.37873	5.77298	6.63896	6.40697	6.23242	6.31934	6.44994	6.57933	6.53403	6.35378	6.28237	6.04025	5.80486	5.85864	6.42536	6.13098
ENSG00000130702	LAMA5	5.99123	4.96087	4.81595	5.23807	4.50856	4.97356	4.77134	5.33764	5.28499	5.36154	4.95649	5.47824	5.03416	5.41662	5.88858	5.99482	5.89312	5.24114	5.14388	5.36812	4.46593
ENSG00000198561	CTNND1	5.99022	6.36484	6.2206	6.18502	5.95903	6.19868	6.23872	6.18219	6.01651	6.13968	5.7489	5.84851	5.84329	5.81457	6.33007	6.16654	6.32351	6.29499	6.37342	6.1492	6.06563
ENSG00000185551	NR2F2	5.98517	3.67356	6.09245	4.75533	5.75265	5.03345	4.93441	4.34287	4.10329	4.06442	4.54812	5.26529	4.07941	4.7673	4.20655	4.66812	3.95851	3.4784	3.32163	4.20683	3.39271
ENSG00000088832	FKBP1A	5.98315	4.76049	6.27198	5.26316	5.69104	5.38334	5.41709	5.27832	4.73879	4.94448	4.85672	5.91832	4.24854	4.80891	4.92804	5.50275	4.37108	4.31216	4.19692	4.87094	4.36842
ENSG00000204469	PRRC2A	5.97706	4.76894	5.57231	5.35092	5.55315	5.33656	5.12271	6.04344	5.95816	5.90128	5.60973	6.31446	5.63383	5.94501	5.85532	5.92978	6.08906	5.80055	5.6999	5.75751	5.34704
ENSG00000125844	RRBP1	5.97298	5.97073	5.68722	5.79595	5.28925	5.59339	5.9131	5.38836	5.59863	5.2015	5.45507	5.23946	5.45335	5.52252	5.23399	5.10998	5.09217	5.25477	4.94222	5.32105	5.22083
ENSG00000138326	RPS24	5.97298	7.05489	6.20421	6.30037	6.17293	6.34589	6.37402	6.1872	6.53923	6.36645	6.363	6.21242	6.33179	6.5023	6.28915	6.35376	6.35004	6.73096	6.45797	6.43728	6.35226
ENSG00000087074	PPP1R15A	5.96583	6.3271	7.29231	6.16957	6.10538	6.14438	6.32851	3.53488	3.48166	3.23982	3.42976	3.40654	3.51046	3.9449	3.75716	3.67586	3.62657	3.25556	3.40624	3.72998	3.65375
ENSG00000164733	CTSB	5.95451	7.06631	5.00106	5.91826	6.65087	5.63361	5.70975	7.33751	6.42748	6.78635	6.17265	5.67594	6.0418	6.36183	7.66526	6.95817	7.31827	7.26472	7.18319	6.83555	6.9518
ENSG00000152818	UTRN	5.95347	5.62466	6.32239	6.20057	6.1689	5.9362	6.14152	6.3921	6.16629	6.44636	5.49531	5.32564	5.23133	5.2816	6.62559	6.47933	6.83483	6.97509	6.82327	5.93421	6.20645
ENSG00000134333	LDHA	5.95037	6.57065	7.33611	6.56832	5.18615	5.22348	5.45087	6.54391	6.84419	7.11821	6.95589	7.42925	6.92832	6.59924	6.21721	6.77277	6.53051	6.1827	6.16545	6.48762	6.18706
ENSG00000115053	NCL	5.94518	4.69991	5.65332	5.40994	5.29369	5.48228	5.48331	6.70649	6.59538	6.41756	6.83264	7.25828	6.62984	6.91175	6.18979	6.49638	5.93474	5.93837	5.51042	6.39298	6.22599
ENSG00000151458	ANKRD50	5.94518	4.91523	6.42419	5.08723	6.58283	6.89755	6.30504	4.13176	4.3182	3.63385	4.80974	4.85199	4.66739	5.00026	4.5019	4.46162	3.98085	4.34691	3.71337	4.95276	4.97417
ENSG00000172757	CFL1	5.94518	6.1148	5.67225	5.98138	5.74726	5.53451	5.94548	7.18214	7.19781	7.23969	7.07664	7.055	7.14857	7.22001	7.24166	7.26836	7.14244	6.96702	6.9691	7.33685	7.21163
ENSG00000141429	GALNT1	5.94414	5.8818	5.22787	5.42279	5.34031	5.3144	5.66247	5.95279	6.72238	6.42534	6.8663	6.53813	6.65512	6.17695	6.15892	6.17443	5.87261	6.43164	6.2489	6.50292	6.54074
ENSG00000105193	RPS16	5.94206	5.6602	5.64567	5.82671	5.90094	5.88592	5.86246	6.14863	5.42912	5.70497	5.47855	5.77516	5.51057	5.7024	5.7609	5.72814	5.77048	5.33487	5.23924	5.58403	5.06824
ENSG00000138835	RGS3	5.94206	5.81771	5.29129	5.70772	5.71114	5.80146	5.44794	5.46042	4.92915	4.47264	4.88058	4.38488	4.84889	4.65795	5.65888	5.3525	4.97785	5.40707	5.51922	4.88383	4.91097
ENSG00000110422	HIPK3	5.93055	6.44397	6.26783	6.07297	5.80033	6.07091	6.09242	3.62164	3.63415	4.18416	4.38238	4.14625	3.94381	3.73743	3.86618	3.83359	3.698	3.91849	4.21353	3.72111	3.97369
ENSG00000162458	FBLIM1	5.9295	6.26193	5.89061	6.02478	5.90482	6.12214	6.16956	6.18259	5.71157	5.903	5.89593	5.9681	6.36346	6.31791	6.47275	6.21875	6.1634	6.24995	6.11399	6.40549	6.05286
ENSG00000141367	CLTC	5.92529	6.12471	5.96107	5.71199	5.93835	5.86917	6.09317	6.50136	6.53153	6.60313	6.7572	6.75082	6.72263	6.59351	6.48852	6.44786	6.56666	6.80006	6.7094	6.79403	6.83179
ENSG00000144724	PTPRG	5.92318	5.1427	6.0962	5.83492	6.13955	6.23548	6.0739	3.40586	3.41219	3.26136	3.707	3.80906	3.39965	3.82785	4.09844	3.71002	3.70025	3.69948	3.81755	3.75759	3.83034
ENSG00000196498	NCOR2	5.92318	3.77772	5.41335	4.94539	4.98081	5.04149	4.82114	4.7468	4.39119	3.96616	4.24498	4.95787	3.7765	4.59945	4.53978	4.54982	4.15718	3.778	2.99166	4.29221	3.22069
ENSG00000197956	S100A6	5.90832	6.60538	5.96005	6.30295	5.39101	5.73764	6.24515	6.55404	6.15843	6.94609	6.39112	6.34932	6.66807	6.54855	6.75439	6.87632	6.93205	6.50325	6.51194	6.97606	6.83478
ENSG00000107281	NPDC1	5.90619	5.53743	5.76689	5.63721	5.44666	5.41801	5.6015	4.05392	3.92524	4.11262	4.11771	4.21659	3.95135	4.2727	4.48887	4.5752	4.2824	4.30669	4.49532	4.07812	3.88221
ENSG00000166033	HTRA1	5.90405	5.99123	5.00306	5.24022	5.90288	6.0111	6.1029	3.58075	2.81958	2.77674	3.20367	3.01368	3.5298	3.81541	4.79008	4.69639	3.6171	4.25965	3.43574	4.062	4.41612
ENSG00000165280	VCP	5.90083	6.72845	5.81311	6.09156	5.5946	5.72134	6.00255	7.21866	6.92372	6.9008	6.91898	6.73345	7.25944	7.2171	7.01647	6.82255	7.04285	7.03144	6.82496	7.16503	7.13658
ENSG00000135919	SERPINE2	5.89869	3.93482	5.69465	6.33527	4.90917	5.0853	5.01032	0.0384566	1.01299	1.85233	1.80754	2.31972	1.08471	3.06169	-0.641509	-1.58385	-0.807684	-0.665276	-0.527999	0.369106	1.28326
ENSG00000260032	NORAD	5.89331	5.83939	6.41747	5.97202	6.1494	6.59426	6.61998	5.07421	5.11739	4.92478	5.22191	4.88322	4.93779	5.19562	5.22288	5.23926	4.84	5.36179	5.54569	5.07825	5.74166
ENSG00000198888	MT-ND1	5.88791	1.57974	5.6212	5.58609	5.02428	4.46362	4.26512	5.23324	5.6773	5.09342	3.91065	5.74556	4.60448	5.14031	4.43948	4.7061	4.84	2.92683	4.00752	4.1916	3.41636
ENSG00000136295	TTYH3	5.88683	4.52591	4.81368	4.791	4.64942	4.76329	4.80289	5.91506	5.41802	5.5374	5.1769	5.49127	5.19861	5.30334	5.69976	6.00542	5.68941	5.30988	5.29419	5.37597	5.0739
ENSG00000196923	PDLIM7	5.8814	5.1074	5.14535	5.75778	4.9567	4.86073	5.19444	4.81373	4.81766	4.72462	4.65071	4.5911	4.87073	5.06957	5.25916	4.86939	4.94365	5.01537	4.24518	5.06079	4.73066
ENSG00000047410	TPR	5.87923	6.2422	5.98449	6.03225	5.83329	5.78762	5.95211	5.28208	5.70744	5.79566	5.53417	5.56784	5.5429	5.6476	5.4203	5.19256	5.48929	5.7116	5.53396	5.55323	5.51616
ENSG00000183087	GAS6	5.87923	5.52206	6.13766	6.95123	5.91448	6.13245	6.38233	2.73835	2.70474	2.34635	2.84512	2.08203	2.53938	2.09769	3.33623	3.00013	2.47411	3.10825	1.96799	2.28736	2.44193
ENSG00000169045	HNRNPH1	5.87487	5.6415	6.37341	5.60249	5.17494	5.6685	5.37695	5.96453	6.36083	6.0017	6.33433	6.1079	6.32548	6.5017	5.92331	6.09748	5.85457	6.0253	6.20778	6.33604	6.66332
ENSG00000126247	CAPNS1	5.87268	5.60248	5.82444	6.00941	5.66267	5.37352	5.64516	5.72171	5.62956	5.85974	5.39819	5.68872	5.45816	5.53862	5.78952	5.75088	5.81521	5.34083	5.48798	5.43598	5.19124
ENSG00000143549	TPM3	5.87159	6.20758	6.28269	6.38572	5.44799	5.80619	5.78325	6.68338	6.67825	6.86453	6.60433	6.60784	6.59341	6.68417	6.36527	6.34815	6.38205	6.13103	6.0159	6.55462	6.55391
ENSG00000130707	ASS1	5.8683	5.22206	5.97639	6.40815	5.96927	5.82411	6.07883	-1.84552	-0.429113	1.0463	1.55191	1.77616	1.54935	-0.794264	-2.83552	-2.08832	-2.67367	-1.49429	-1.72756	-0.805192	-2.38865
ENSG00000202538	RNU4-2	5.86501	9.78125	6.64791	6.67637	8.75366	7.48181	6.0133	5.32859	5.1856	5.55495	5.60018	6.15011	6.2408	4.10203	5.60327	7.27988	5.23264	6.44484	7.25621	6.26952	6.4594
ENSG00000142910	TINAGL1	5.85508	5.94452	5.98651	6.31857	4.60954	5.60231	5.92622	6.49166	6.46301	6.40537	6.95875	6.97609	7.13953	6.99194	6.89049	6.56565	6.31822	6.5562	6.38744	6.78014	6.16041
ENSG00000196628	TCF4	5.84843	5.94824	6.29007	5.91994	5.92885	6.07483	6.17205	5.90779	5.98199	5.8366	5.25772	4.91862	4.85329	5.32442	6.02857	5.91574	5.97217	6.09359	6.19411	5.68324	6.23333
ENSG00000082397	EPB41L3	5.84509	6.7801	5.99656	6.332	6.07124	6.04095	6.11589	5.16327	5.41904	5.48942	5.82175	5.49289	5.67268	5.25598	5.19707	4.66377	4.87522	5.20729	4.4666	5.16858	4.99913
ENSG00000166888	STAT6	5.84509	5.82987	5.31879	5.68539	5.44666	5.41069	5.23107	4.94558	4.803	5.10128	4.77771	4.8482	4.77283	4.65795	5.11356	5.03255	4.91444	4.66878	5.03421	4.61887	4.28403
ENSG00000149564	ESAM	5.83838	5.40815	5.58835	6.00055	5.14079	5.49085	5.45263	5.97501	5.80165	5.81673	5.01853	5.38357	5.17306	5.52252	6.14202	6.04252	5.8095	5.4402	5.59228	5.59265	5.54991
ENSG00000170989	S1PR1	5.83726	5.93362	5.90669	6.12456	5.49253	5.73177	5.52676	4.99906	4.92274	5.52576	5.18594	5.5516	4.4939	4.91091	5.15161	5.12679	5.06541	4.53745	4.83325	4.68421	4.78545
ENSG00000253729	PRKDC	5.83614	5.15624	5.19508	5.27999	5.61132	5.16109	5.40746	6.01438	6.38771	6.24075	6.03831	6.17758	6.06661	6.25235	5.88091	5.90814	6.59093	6.54256	6.08495	6.42672	6.17906
ENSG00000170921	TANC2	5.83502	4.49198	5.3442	5.35787	5.34603	5.29801	4.94277	2.80462	3.08491	3.22345	3.36093	3.42703	2.55565	2.92589	3.33501	2.90432	2.97484	2.93946	2.97105	2.30938	2.17095
ENSG00000083845	RPS5	5.82149	6.54695	5.19158	6.08559	5.72218	6.13962	6.36223	6.58858	6.14105	6.2586	5.96297	5.8946	6.27068	6.27524	6.29836	6.15861	6.40925	5.95634	6.25179	6.39748	6.34624
ENSG00000266714	MYO15B	5.82149	4.87452	5.96107	5.22128	5.17011	5.32222	4.56705	0.261864	2.08364	1.72243	2.21916	1.81813	1.53847	1.17311	0.623912	2.66905	0.945784	1.58215	2.16018	1.6054	-0.343465
ENSG00000031081	ARHGAP31	5.81581	5.2834	5.58436	5.79924	5.18615	5.54586	5.48045	4.96954	4.74041	4.91462	4.82862	5.18336	4.6954	4.91091	4.96381	4.88175	4.93509	4.63524	4.95246	4.77269	4.64757
ENSG00000147403	RPL10	5.8124	6.48814	5.85459	5.95966	5.83023	6.32357	6.65422	5.57601	5.66327	5.25114	5.55205	5.322	5.54086	5.34986	5.39868	5.99085	5.78775	5.68093	5.82728	5.81281	5.99607
ENSG00000198899	MT-ATP6	5.81012	2.97056	5.73842	5.47854	5.14736	4.81368	4.10457	5.3275	5.4266	5.55249	4.45522	6.1816	4.78247	5.29544	4.37953	4.39718	4.82206	3.00846	4.58701	4.18368	3.42198
ENSG00000115524	SF3B1	5.7998	6.3416	6.46602	6.13529	6.07469	6.13621	6.21649	5.76073	5.89373	5.88685	5.90188	5.8249	5.96215	5.8358	5.84875	5.85706	5.92084	6.1992	6.21334	5.94772	6.11315
ENSG00000006125	AP2B1	5.79865	4.82528	5.39066	5.66029	5.93835	5.27401	5.22423	5.68388	5.18262	5.44804	5.25378	5.70768	5.05084	5.18748	5.46563	5.47605	5.22564	4.92227	4.78788	5.01771	4.57881
ENSG00000148248	SURF4	5.79635	5.62889	5.40583	5.70149	5.23631	5.33596	5.45029	6.14286	5.99393	5.91643	5.9959	6.02353	6.21599	6.16173	6.00816	5.87626	5.7678	5.69913	5.55346	5.96285	5.73791
ENSG00000102010	BMX	5.79404	5.9102	6.08682	5.85367	5.56546	6.19311	5.88475	4.41581	4.7233	5.29717	4.94899	4.96138	4.80873	4.28663	4.51052	4.49279	4.81015	4.64056	4.91867	4.64363	4.70054
ENSG00000084112	SSH1	5.79057	4.76357	5.06358	5.03675	4.56362	5.12919	5.16831	3.81555	3.45427	3.59301	3.74725	3.99665	3.36519	3.64747	3.92865	3.84242	3.90887	3.3076	3.616	3.25133	2.88459
ENSG00000158352	SHROOM4	5.78942	5.12964	5.62509	5.90916	5.01173	5.48013	5.37448	4.92603	4.76051	5.37117	4.6707	4.97884	4.13461	4.38249	4.69397	4.60792	4.94507	4.64442	4.88472	4.35131	4.27784
ENSG00000115461	IGFBP5	5.78245	6.69337	4.82275	4.24425	5.72108	5.01871	5.72048	-4.81952	-4.73654	-6.22982	-3.47396	-3.13606	-4.92278	-7.73678	-6.29495	-4.34466	-6.0429	-5.58175	-4.53492	-4.23343	-6.58505
ENSG00000198763	MT-ND2	5.78012	1.09431	5.46782	4.78512	4.70614	4.00494	3.40292	4.36074	4.69098	4.41854	3.50633	5.60653	3.91187	4.33234	3.48695	4.027	3.57242	1.53303	3.258	3.28875	2.39509
ENSG00000283907	AD000090.1	5.77779	-4.3029	5.51753	-1.59509	5.5801	3.39622	1.64849	2.56911	3.01433	-1.18543	1.50453	4.56361	-2.96342	1.11809	-3.12503	2.44976	-3.92742	-4.44425	-4.53492	-5.15097	-4.46957
ENSG00000164111	ANXA5	5.77662	6.14993	5.49644	5.88392	4.99544	5.42976	5.8304	6.63954	6.42346	6.59732	6.6393	6.56573	6.69331	6.71913	6.67161	6.44641	6.47222	6.47901	6.38217	6.8391	6.90676
ENSG00000197747	S100A10	5.77545	4.00153	5.70694	5.1481	4.82768	5.16444	4.99995	4.09208	3.81112	4.63411	4.43641	5.61474	4.30951	4.37794	4.36296	4.59948	3.80833	3.35194	3.9242	4.17571	3.79829
ENSG00000003402	CFLAR	5.77311	6.2339	6.24694	6.16221	5.65	6.01519	5.80312	4.98207	4.92417	5.26153	4.85342	4.7143	4.68476	5.01832	4.97671	4.84873	5.07885	4.98525	5.08191	4.69574	5.07152
ENSG00000144749	LRIG1	5.77194	4.85155	4.49147	4.77921	4.81948	5.10008	5.44324	3.86848	3.58087	3.47811	3.51592	3.66699	3.75239	3.05845	3.81052	3.50848	3.72583	3.78763	4.09975	3.6546	3.48059
ENSG00000133030	MPRIP	5.77076	5.23543	4.66282	5.1133	5.17655	5.2802	5.05571	5.28695	4.96771	5.00838	5.05968	5.34731	4.91064	5.30471	5.14644	5.24093	5.04036	4.89823	4.75599	5.11777	4.83964
ENSG00000137818	RPLP1	5.77076	5.75683	5.49644	5.71083	5.92599	5.64901	5.96899	6.09347	5.81785	5.867	5.93197	6.1367	5.84458	5.98186	5.74751	6.12215	6.05239	5.9172	5.89288	5.97481	5.80413
ENSG00000138674	SEC31A	5.76606	5.45413	5.59366	5.83456	5.35882	5.52671	5.49302	6.12289	5.98233	6.08636	5.70215	5.84661	5.96402	5.88447	6.00072	5.76285	6.08456	5.82902	5.97432	5.93037	5.6789
ENSG00000073921	PICALM	5.76016	5.73934	5.9774	6.46722	5.80033	5.45899	5.51616	4.72157	4.81996	5.1875	5.20422	5.40869	5.28301	5.43017	4.80154	4.60013	4.45728	4.43478	4.62321	4.7891	5.10422
ENSG00000118680	MYL12B	5.75661	6.1511	6.14128	6.33628	5.75265	5.97986	6.08677	6.03679	5.85983	6.05394	5.98709	5.86049	6.31874	6.07349	6.03979	5.69411	5.76378	6.12137	5.71766	6.13578	6.17934
ENSG00000149115	TNKS1BP1	5.75661	6.18881	6.17796	6.22794	5.36869	5.52775	5.84161	4.65302	4.34294	4.69771	4.23485	3.86519	4.01091	4.01183	4.79803	5.21185	4.72225	4.74625	4.92751	4.33576	4.33654
ENSG00000140937	CDH11	5.74949	5.79155	6.62671	5.88392	6.21184	6.6738	6.52384	3.95573	3.39994	3.81412	5.65003	6.25697	6.13994	4.68292	3.97301	3.21928	2.50528	3.31972	3.54723	4.59779	3.03395
ENSG00000038382	TRIO	5.74829	5.02641	4.99305	5.41804	5.19411	5.38908	5.18602	5.45776	5.2162	5.18151	5.17955	5.02996	5.25948	5.58473	5.56549	5.23088	5.7967	5.5913	5.35535	5.49299	5.36854
ENSG00000152291	TGOLN2	5.74113	5.67376	6.1691	6.13413	6.10369	5.98214	6.12436	5.4974	5.37485	5.62414	5.81982	5.99122	5.66396	5.66023	5.79174	5.56706	5.52838	5.58579	5.63144	5.63666	5.63664
ENSG00000099260	PALMD	5.73993	5.56812	6.32558	6.58894	5.47566	5.77933	5.92115	4.07139	3.87596	3.7744	4.86096	4.8045	4.53961	4.2061	4.22828	3.53049	3.79578	4.56876	4.47265	4.29864	4.2306
ENSG00000123384	LRP1	5.73873	5.04551	4.25408	4.36652	5.52315	4.56552	5.14388	1.78463	1.03429	0.875213	1.67686	0.833564	1.14331	0.821642	2.12431	1.35886	2.00695	1.85288	1.30186	0.58299	-0.293497
ENSG00000173517	PEAK1	5.73873	4.04393	4.95645	5.20705	4.77563	4.945	4.71195	4.98898	4.7525	4.60859	4.16267	4.64457	3.67755	4.17349	4.63455	4.60598	4.64331	4.47163	4.26573	4.48304	4.24229
ENSG00000215301	DDX3X	5.73873	6.60838	7.01076	6.08079	7.00157	6.59351	6.96991	5.86234	5.98062	5.76936	6.5607	6.14651	6.64787	6.5167	5.78042	5.92667	5.68516	6.24805	6.0224	6.55039	6.82677
ENSG00000116678	LEPR	5.73633	5.68477	6.75539	6.62521	5.97389	7.01973	6.49544	0.923867	1.03429	1.83806	3.36889	3.31423	1.6301	1.53235	1.06553	0.756878	1.26392	2.16106	2.85144	0.546387	0.588209
ENSG00000155506	LARP1	5.73151	3.84902	5.09198	5.04662	5.53698	4.91825	4.96345	5.84492	5.80436	5.80119	5.88925	6.24163	5.59412	5.88034	5.69952	5.78905	5.75679	5.18792	4.82584	5.53563	4.96297
ENSG00000150764	DIXDC1	5.72668	5.69448	5.11061	5.95803	4.27657	5.52254	5.64158	3.03934	2.82264	2.73307	3.75739	3.62327	4.12192	3.73946	3.65973	3.47055	2.83872	3.19369	2.66173	3.55294	3.40221
ENSG00000086062	B4GALT1	5.72426	4.42745	6.17796	5.99769	5.04378	5.44086	5.48159	4.01923	3.73188	3.90161	4.24282	4.86331	3.91046	3.75257	3.81749	3.73631	3.42674	3.39381	3.62456	3.54832	3.20991
ENSG00000174437	ATP2A2	5.72426	5.34224	5.44892	5.47717	5.21302	5.315	5.53176	5.92927	5.84108	5.78292	6.04516	6.36312	6.03955	6.0282	5.6613	5.63151	5.65218	5.56507	5.4343	5.75784	5.7154
ENSG00000130522	JUND	5.72183	5.0934	6.62477	5.82742	6.24514	6.1918	5.99734	2.86197	2.61925	3.003	2.93364	2.9771	2.87524	2.61967	2.75399	2.98825	2.80572	3.0527	3.10394	2.71871	2.28634
ENSG00000157514	TSC22D3	5.71697	6.69135	7.12374	6.12892	5.59219	5.16778	5.32356	0.892757	0.969436	0.882183	1.83462	1.30134	0.870191	1.34271	1.70693	1.42499	1.12368	1.5578	2.11669	1.2697	1.04673
ENSG00000140416	TPM1	5.71453	6.43652	5.2003	5.63639	5.3701	5.57839	5.96284	4.54711	4.86671	4.3321	5.37433	4.71012	4.95254	5.5867	5.11214	4.55654	4.77808	5.18594	4.67322	4.72436	4.90997
ENSG00000176435	CLEC14A	5.71453	5.65275	5.96415	6.17577	5.52063	6.13996	6.01607	5.98311	5.45304	5.5252	5.99311	5.69929	5.74896	6.00921	6.43304	6.50457	5.75219	6.11912	6.81206	5.77013	5.86091
ENSG00000145592	RPL37	5.71331	6.54203	5.77742	5.96325	6.01847	6.13039	6.30342	5.91434	6.06323	5.67519	5.80571	5.62142	5.83646	5.84572	5.88651	6.07026	5.91384	5.83979	6.04751	6.13116	5.96962
ENSG00000102804	TSC22D1	5.70964	7.07454	7.46221	6.50708	5.84849	5.67368	6.25492	3.44123	2.93447	3.11225	2.63457	3.07988	3.04236	3.15273	3.85352	3.78176	3.62894	3.7234	3.58123	3.34133	3.28171
ENSG00000143869	GDF7	5.70842	6.39617	5.18632	6.26461	7.28571	7.46587	7.44875	1.19649	1.2223	2.1292	4.93521	3.75606	4.49531	1.85381	0.0567238	-1.2108	-0.59444	0.509947	-0.996953	0.881232	-1.54066
ENSG00000100106	TRIOBP	5.70719	5.16441	5.37842	5.81123	4.95857	5.4197	5.57164	4.3255	3.84767	4.35608	4.22246	4.11292	4.52958	4.47176	4.61968	4.50535	4.44995	4.1431	4.22125	4.75409	4.26435
ENSG00000163513	TGFBR2	5.70719	5.42914	5.46058	5.78678	5.46123	5.60231	5.37015	6.50586	6.01215	6.67174	6.02809	6.04302	5.31894	5.90629	6.93642	6.38373	6.63004	6.55068	6.80814	6.09082	6.42879
ENSG00000167548	KMT2D	5.70597	4.10224	5.16152	4.86818	5.3729	4.80684	4.76664	4.87122	4.82761	4.49042	4.41926	4.87703	4.05163	4.66063	4.61869	4.74956	4.94413	4.38605	4.17324	4.33307	3.64977
ENSG00000087086	FTL	5.70474	6.44277	5.80742	6.10018	7.77417	5.86794	6.2082	6.82388	6.39313	6.25592	6.15031	5.91348	6.49712	6.29604	6.83213	6.64094	7.15334	6.78604	6.92518	6.60267	6.0524
ENSG00000135404	CD63	5.70474	6.6013	5.65966	5.84838	5.45859	5.57939	5.90286	5.85101	5.5272	5.74996	5.72713	5.59375	5.77621	5.83035	5.87132	5.93263	5.52775	5.48958	5.453	5.85021	5.62896
ENSG00000204131	NHSL2	5.70474	4.55818	5.26493	5.19045	5.336	5.18373	5.05108	4.44358	4.60553	5.13194	4.56842	4.87703	4.18603	4.29836	4.71697	4.69395	4.91927	4.317	4.54169	4.47129	4.44539
ENSG00000146674	IGFBP3	5.70105	8.30492	4.74619	5.06979	6.27993	1.84285	4.59276	-0.407711	-1.63221	0.0117636	1.89833	0.988633	1.50907	0.759077	-0.33302	-1.89988	-3.72097	-1.71386	-1.46717	-0.116321	-1.3756
ENSG00000109079	TNFAIP1	5.69488	5.23543	5.96313	6.14077	5.36165	5.70854	5.73114	4.30939	4.15524	4.2354	4.15731	4.22442	4.10789	3.98475	4.48504	4.35231	4.48229	4.22785	4.45529	4.06739	3.93229
ENSG00000162909	CAPN2	5.69488	4.42745	4.67538	4.53726	4.56362	4.81539	5.09448	6.6347	5.9658	6.11678	6.43443	6.37591	6.4617	6.25466	6.86969	6.65589	6.21459	6.50763	6.01279	6.85001	6.55934
ENSG00000122862	SRGN	5.69364	6.92428	6.72791	6.27199	6.65318	6.14234	6.40972	6.50522	6.49336	6.58349	6.91615	7.0287	7.33503	6.85281	6.24316	6.0924	6.35326	5.79578	5.81066	6.89794	6.86612
ENSG00000019582	CD74	5.69116	5.74753	4.99506	6.03999	5.31864	4.06787	5.15399	-3.23456	-1.70092	-0.149449	1.00263	-0.197463	-0.592859	-1.7595	-3.79245	-4.34466	-3.92742	-5.58175	-2.35272	-3.3667	-4.08255
ENSG00000101000	PROCR	5.68619	7.11984	6.23934	5.91321	6.32771	6.64697	6.74542	5.39254	5.43564	5.24338	5.57431	5.74896	6.01884	5.33954	5.19573	5.57735	5.45379	5.09473	5.04787	5.75884	5.36733
ENSG00000100644	HIF1A	5.67996	6.34237	6.44048	6.45499	5.60298	5.47312	5.84251	5.33547	5.52767	5.66563	5.22922	5.41297	5.06385	4.98624	5.57606	5.32324	5.34314	5.32107	5.29175	5.13019	5.3384
ENSG00000147162	OGT	5.67495	5.25634	5.83007	5.42089	5.27131	5.38564	4.82114	5.01269	5.2416	5.32237	5.01388	4.94135	4.82746	4.85591	5.37526	5.26205	5.47624	5.43157	5.90842	5.05456	5.1498
ENSG00000161835	GRASP	5.67119	5.62805	6.28187	5.3989	5.04378	5.3531	5.60677	3.33818	2.89718	2.98369	3.25038	3.33967	3.58016	3.60252	3.3031	3.10838	3.07344	3.50836	3.32736	3.49329	3.23353
ENSG00000102359	SRPX2	5.66993	5.01095	5.38608	5.2716	4.12173	5.50784	4.18285	4.88709	4.62847	4.42809	3.71742	4.02381	4.32857	4.50193	5.12764	4.55453	5.1801	4.78173	4.3055	4.45944	4.28762
ENSG00000114544	SLC41A3	5.66489	5.14329	5.38455	5.66711	5.36024	5.52045	5.62037	3.11543	2.67115	3.27069	3.05043	3.10552	3.15582	2.92233	3.16516	2.94382	3.21684	3.2301	3.13478	2.99256	2.71492
ENSG00000139263	LRIG3	5.66362	5.49684	5.81425	4.77773	5.08542	6.03912	5.53342	3.50433	3.78152	3.03306	3.97291	4.43801	3.97775	3.25545	3.60239	3.45624	3.58098	3.76919	4.31803	3.2832	2.74661
ENSG00000095637	SORBS1	5.66236	5.48337	4.95026	5.20043	5.22082	5.05384	5.29708	-0.487328	-0.908723	-0.94442	1.26964	0.539503	-0.304803	-0.638746	-0.91413	-1.84216	-1.28801	-0.870258	-0.142601	-1.20195	-1.07198
ENSG00000163902	RPN1	5.66236	6.59915	5.66345	6.04154	5.28776	5.34781	5.68307	6.21478	6.22447	6.14621	6.25548	6.11476	6.41824	6.36331	6.08416	5.95569	5.95651	6.0003	5.79763	6.23651	6.104
ENSG00000152932	RAB3C	5.66109	6.22471	6.93492	6.11051	6.66581	6.34736	7.06866	-4.16745	-1.38604	-1.43975	-0.254281	0.792045	-2.11543	-1.39693	-5.55799	-3.42712	-4.45794	-4.73376	-4.1479	-3.46291	-3.52616
ENSG00000159840	ZYX	5.65856	4.74422	5.55473	5.69444	5.36306	5.06177	5.27937	5.67447	5.64781	5.99809	5.77609	6.42554	5.65202	5.96594	5.75297	5.70322	5.80141	5.42373	5.04672	5.68307	5.04779
ENSG00000170485	NPAS2	5.65856	4.06404	4.88899	4.33967	4.16769	4.26436	3.54142	3.22565	3.33062	3.63282	3.29144	3.936	2.99939	2.85848	3.57078	3.31593	3.55018	3.03075	2.87382	2.97315	2.35844
ENSG00000140092	FBLN5	5.65348	4.6027	5.61469	5.48173	6.73614	5.41408	5.74745	1.01337	0.648889	0.64874	2.41382	2.8463	3.157	2.80141	1.19957	-0.80034	-1.74522	-0.14213	-1.09581	2.62966	0.608063
ENSG00000172493	AFF1	5.63426	4.56173	6.20421	5.73888	6.18815	5.74392	5.7263	3.64283	3.69892	4.09023	4.2283	4.36732	3.85749	3.8839	3.88288	3.83359	4.15554	3.98316	4.06985	3.72316	3.63452
ENSG00000147862	NFIB	5.63297	4.61979	5.75864	5.25626	5.69665	5.66944	5.74792	4.97187	5.00054	4.98389	5.00199	5.44514	4.8844	4.87263	5.42344	5.34747	5.21861	5.35533	5.58532	5.04993	5.15431
ENSG00000129250	KIF1C	5.63167	5.57559	4.95645	5.54228	4.94355	5.29434	5.49983	5.89362	5.69412	5.69065	5.71079	5.40353	5.80637	5.86511	5.90952	5.83594	5.65131	5.48097	5.5721	5.71588	5.62308
ENSG00000160691	SHC1	5.6239	5.89273	5.29943	5.44861	4.77986	4.88856	5.02299	6.1926	5.96164	5.88836	5.70817	5.76514	5.88895	5.74262	5.96626	5.65894	5.89656	5.74006	5.95948	5.99857	5.71901
ENSG00000179222	MAGED1	5.6239	4.19067	5.22787	5.08544	5.09395	4.96205	5.21391	5.56464	5.18619	4.90781	4.70621	4.95434	4.98695	5.05214	5.36787	5.34786	5.36985	5.18461	5.24101	5.15294	4.64156
ENSG00000130723	PRRC2B	5.6226	5.00641	5.27156	5.29456	5.33168	5.30228	5.45263	5.45077	5.21153	5.11651	5.02316	5.06633	4.93641	5.27288	5.39694	5.40372	5.48604	5.5008	5.20797	5.14302	4.81102
ENSG00000151914	DST	5.6226	5.31627	5.26659	5.40898	5.32155	5.32821	5.66702	5.64677	5.85124	5.88294	5.46624	4.9742	5.27129	5.35151	6.15549	5.79076	6.5751	6.75893	6.53422	5.99857	5.89296
ENSG00000124201	ZNFX1	5.6213	4.93584	5.4936	6.10077	5.00452	5.49458	5.50717	4.18249	4.015	4.09997	4.05002	4.21659	3.85822	4.05153	4.37541	3.97376	4.1959	4.08109	4.06127	3.98602	3.82963
ENSG00000125691	RPL23	5.61739	6.82923	5.70081	5.99418	6.08585	6.18686	6.22508	6.14945	5.94628	5.87379	5.93286	5.57474	6.1781	5.98763	5.92088	6.08916	6.18441	6.22697	6.06321	6.2304	5.96722
ENSG00000122218	COPA	5.61347	5.87113	5.57366	5.86487	5.34031	5.5804	5.65435	6.08812	5.94241	5.98217	5.64457	5.68234	6.02891	5.95899	6.03063	5.9916	6.11708	6.10133	6.07177	6.00743	5.94868
ENSG00000187514	PTMA	5.60954	6.44709	6.46167	5.8784	5.23631	5.36481	5.84474	5.25863	5.78604	5.23217	5.68525	5.19137	5.72598	5.76667	5.17078	5.60419	5.24616	5.35503	5.16004	5.77112	5.72111
ENSG00000187800	PEAR1	5.60691	4.30707	5.42232	5.252	5.0734	4.82897	4.87802	5.28881	5.11677	5.43537	5.2252	5.38881	5.23415	5.38038	5.45589	5.19299	5.42079	5.24146	5.13574	5.38744	5.00101
ENSG00000200488	RN7SKP203	5.60691	8.12804	5.03266	5.62284	5.61132	5.25023	4.71195	4.48523	3.57906	4.15352	4.09869	3.80645	3.87992	3.95366	4.32129	4.75015	5.09686	4.95372	4.80784	4.58694	4.47001
ENSG00000035862	TIMP2	5.60428	4.17225	5.39371	5.43693	5.49639	5.64613	5.46428	4.1929	3.84616	4.32125	4.22539	4.60165	3.84871	3.62681	4.52283	4.69943	4.34906	4.22528	4.64633	4.05279	3.64977
ENSG00000116962	NID1	5.60428	5.39977	5.53969	5.65425	6.17936	5.93424	5.91267	5.00316	4.62233	4.92141	4.0963	4.28179	3.68906	4.05967	5.66999	5.52964	5.48929	5.84964	5.69861	4.38496	4.53151
ENSG00000198752	CDC42BPB	5.60164	5.22709	5.36917	5.69366	5.082	5.44086	5.15039	5.14605	4.76211	5.04222	4.82766	5.00633	4.84926	4.95169	5.24405	5.15053	5.26335	5.19122	4.97486	4.90958	4.83754
ENSG00000129351	ILF3	5.60032	4.64087	5.39219	4.98571	4.93598	4.85493	4.80564	5.94736	5.82932	5.64247	5.85708	6.07637	5.6793	5.98165	5.55927	5.90234	5.67863	5.32378	4.98457	5.80299	5.46967
ENSG00000046889	PREX2	5.599	4.89572	5.29129	4.38706	4.78619	5.63361	4.4394	4.59983	4.73391	4.72801	5.08486	5.01199	4.89047	4.88596	4.47956	4.06048	4.43182	5.06732	5.41356	4.65835	4.71129
ENSG00000115760	BIRC6	5.59503	5.31102	5.3442	5.57078	5.68879	5.48067	5.54937	5.13446	5.34054	5.30367	5.1285	5.06524	5.06732	5.14261	5.08497	5.02482	5.46902	5.60671	5.42764	5.29232	5.25612
ENSG00000115875	SRSF7	5.59371	5.30628	6.2163	4.89506	5.3785	5.6033	4.92601	4.46224	4.44088	4.32509	4.66047	4.64311	4.76741	4.67711	4.07755	4.12611	4.22739	4.19139	4.22587	4.70234	4.87318
ENSG00000172809	RPL38	5.59238	6.13782	5.40733	5.90577	5.74618	5.6718	5.69647	5.95726	5.83426	5.77685	5.65519	5.5122	5.82084	5.83935	5.8513	5.58887	5.55127	5.59529	5.6512	5.77607	5.62369
ENSG00000132466	ANKRD17	5.59105	4.78645	5.57231	5.5212	5.43194	5.26154	5.18813	5.08328	5.10424	5.1723	4.93387	5.2462	4.96241	4.97639	5.01244	4.80875	5.09772	4.82827	4.81398	4.85169	4.57124
ENSG00000101384	JAG1	5.58839	5.19893	5.43272	5.12033	5.73204	5.89966	5.42546	4.7468	4.81305	4.6372	4.54519	4.71012	4.10727	4.93543	5.01092	4.89613	4.49723	4.19402	4.11806	4.23106	4.54101
ENSG00000138448	ITGAV	5.58573	6.26247	4.54175	4.9559	4.3917	5.16578	5.40866	5.55256	5.83084	5.19207	6.018	5.38619	6.17752	6.24184	5.68459	4.96696	5.19331	5.68116	5.40748	5.70156	6.20142
ENSG00000076067	RBMS2	5.57904	4.92351	5.92995	6.01067	5.83634	5.96263	5.84563	4.14172	4.18768	4.41854	4.61657	4.89061	4.41087	4.31613	4.39359	4.30679	4.37881	4.1614	4.20629	4.32724	4.01517
ENSG00000108107	RPL28	5.57501	2.56393	4.8933	4.52231	5.18456	4.71473	4.65613	5.45942	5.07884	4.86843	4.66694	5.50659	4.19875	4.99178	4.90452	5.18564	4.51711	3.67044	3.257	4.20732	2.84888
ENSG00000102316	MAGED2	5.57367	6.49256	6.16554	6.23146	5.65116	6.20391	6.4886	5.1935	5.08651	4.86974	4.83294	4.3549	4.92497	4.97037	5.41772	5.3038	4.93366	5.37288	5.45998	4.92392	5.02397
ENSG00000167615	LENG8	5.57232	4.10345	5.48649	4.97283	4.66324	4.54406	4.37541	4.97141	4.89464	4.97414	4.53403	4.75673	4.55047	4.93321	5.23627	5.0939	5.53783	5.16426	5.37093	4.78975	4.46321
ENSG00000124422	USP22	5.56963	5.83537	4.84071	5.69992	5.46123	5.6614	5.68157	6.16703	5.64651	5.82986	5.68126	5.82104	5.76712	5.71327	6.17596	5.95798	5.92972	5.98383	6.00908	6.0004	5.854
ENSG00000077782	FGFR1	5.56287	4.99729	5.7264	5.65102	4.76712	4.97433	5.51224	4.96628	4.83521	5.31852	4.82621	5.37041	4.85876	4.89372	5.39024	5.34165	5.13514	4.89783	5.03362	5.04584	4.88272
ENSG00000080824	HSP90AA1	5.56287	5.44745	5.70204	5.72165	5.58132	5.49192	5.41288	6.81548	6.81315	6.804	7.08994	7.4565	7.08506	7.13296	6.43771	6.57346	6.34628	6.17739	5.70468	6.60619	6.3826
ENSG00000039560	RAI14	5.56015	5.18981	5.63542	5.51899	4.92837	5.60034	5.28333	6.01031	6.10691	6.11197	5.79615	6.22515	5.73156	5.91124	5.89023	6.03147	6.09206	6.10833	5.91018	6.08883	5.91072
ENSG00000156976	EIF4A2	5.5588	6.60988	6.12946	6.03999	5.88825	6.38118	6.18091	4.93798	5.11614	5.12791	5.34134	5.11028	5.40527	5.47405	5.19004	5.04933	5.39987	5.70006	5.71766	5.29944	5.48227
ENSG00000105372	RPS19	5.55744	7.16026	5.40884	6.26038	5.84647	6.11938	6.38418	7.07751	6.83094	6.49874	6.62179	5.9517	6.95019	6.66683	6.91709	7.07805	7.10202	7.08514	6.95905	7.00487	6.98927
ENSG00000148180	GSN	5.55607	5.47024	5.98953	5.74571	4.50089	5.38965	5.36207	4.45294	4.24245	4.72025	3.99107	3.2846	3.56684	3.90572	4.78742	5.43834	5.01125	4.95021	5.49203	3.97287	4.22257
ENSG00000164054	SHISA5	5.55607	4.94333	5.36141	5.94258	5.24093	5.27958	5.22423	5.29478	5.35172	5.53574	5.35242	5.4018	5.33762	5.35317	5.32878	5.25587	5.14919	5.05578	5.05567	5.26278	4.88137
ENSG00000063046	EIF4B	5.55335	6.30904	5.63284	5.83919	5.80033	6.10968	6.15165	5.37646	5.33089	5.35185	5.15904	4.91379	5.3329	5.06675	5.4531	5.5017	5.48082	6.01751	5.84288	5.37009	5.34359
ENSG00000140391	TSPAN3	5.55198	5.59213	5.63927	5.95574	5.22393	5.56475	5.89297	5.11732	5.11052	5.33671	5.2944	5.25769	5.06227	5.19377	5.24566	5.13714	4.94365	4.98449	5.04295	5.14913	5.3666
ENSG00000161791	FMNL3	5.55198	5.09706	4.44525	5.49846	4.84798	5.02462	5.14822	5.02843	4.80688	4.95732	4.17936	4.09382	4.1042	4.43158	5.41915	5.27271	5.22837	5.01052	5.13001	4.60855	4.80852
ENSG00000163359	COL6A3	5.54788	6.41734	3.94922	4.4774	5.83533	5.54019	5.62869	-3.10332	-4.73654	-4.11435	-0.270675	-3.49863	-5.28535	-4.92942	-6.29495	-5.92962	-6.0429	-5.09633	-8.23536	-5.51354	-6.58505
ENSG00000141905	NFIC	5.54514	3.40446	5.00306	4.68598	4.59999	4.6692	4.33153	4.09294	4.0323	4.18627	4.04919	4.97652	3.67092	3.77151	3.86282	4.10426	3.94152	3.50306	3.46725	3.78338	2.93524
ENSG00000185896	LAMP1	5.54377	6.26465	5.71549	6.00023	5.53447	5.48067	5.66399	5.93882	5.63828	5.87903	5.57575	5.37481	5.69978	5.70655	6.25555	5.98688	6.00933	6.04788	6.00163	5.73888	5.75006
ENSG00000106624	AEBP1	5.54239	5.65813	4.61142	5.16745	4.85402	4.70463	5.23515	3.40586	2.50186	3.21795	3.27741	4.10446	3.50302	3.43752	3.07936	2.81297	2.87298	2.93	3.75793	3.63439	2.62033
ENSG00000152104	PTPN14	5.54239	4.73797	5.49502	6.1491	5.46781	5.67462	5.67255	5.22935	5.09793	5.63733	5.19455	5.58921	5.00385	5.15974	5.40158	5.19987	5.66748	5.25414	4.8779	5.1628	5.03685
ENSG00000162599	NFIA	5.53688	3.96589	5.76571	5.0704	5.60894	5.84973	5.54773	3.07443	2.72125	3.09135	3.43735	3.88754	3.16055	2.98518	3.42215	3.09367	2.78471	2.87028	3.01316	3.20707	3.00678
ENSG00000169100	SLC25A6	5.53688	4.98019	5.09386	4.91675	5.3715	5.25778	5.40322	5.68331	5.5702	5.2612	5.24155	5.22002	5.08113	5.36306	5.45952	5.93443	5.50512	5.23699	5.09402	5.32915	4.85461
ENSG00000090615	GOLGA3	5.5355	5.44025	4.8738	5.28625	5.02962	5.19229	5.35958	5.28433	5.10863	5.09605	4.97138	4.88445	5.1062	5.15747	5.15746	5.12905	5.39121	5.19912	4.97638	5.00427	5.03073
ENSG00000186260	MKL2	5.53135	4.5573	4.8933	4.57612	5.06475	4.36101	5.35019	2.20759	2.08873	2.53946	2.58304	2.93003	1.93658	2.04294	2.40433	2.07225	2.37636	2.05487	2.49001	2.05306	1.81155
ENSG00000069020	MAST4	5.52719	4.3425	5.56152	5.38681	5.24705	5.38736	5.1446	4.52509	4.61616	4.51753	3.94567	3.71777	3.52889	3.76357	4.66963	4.30838	4.76311	4.56214	4.42218	3.87602	4.01083
ENSG00000182446	NPLOC4	5.5258	4.49291	4.57969	4.9953	5.24858	5.38678	5.1446	5.31875	4.90479	4.94406	5.06254	5.18336	5.06701	5.0772	5.10717	5.1313	4.98108	4.74715	4.6298	5.06699	4.90363
ENSG00000205978	NYNRIN	5.52163	4.635	5.56287	5.76714	5.67067	5.62195	5.5711	3.24426	3.05136	3.37566	3.26182	3.72881	3.19443	3.0842	3.00807	2.88736	3.11781	3.7234	3.22663	3.19924	2.75998
ENSG00000011465	DCN	5.51604	8.31643	8.2177	8.26286	8.35164	7.22324	8.81338	-1.6496	1.83938	2.07244	3.3768	2.7735	2.69764	0.702014	-1.90263	-1.36484	-1.6055	-2.41183	-2.21299	-0.0872721	-1.72707
ENSG00000175215	CTDSP2	5.51604	5.6042	5.31879	5.54664	5.8853	5.69748	5.61829	4.84403	4.54562	4.81844	4.76168	5.03219	4.54369	4.42467	4.77136	4.86939	4.91783	4.79263	5.08333	4.66406	4.40576
ENSG00000130985	UBA1	5.51323	4.98019	4.89545	4.95852	4.93598	4.50016	4.8962	6.31114	6.26106	6.14458	5.9959	6.14703	6.24275	6.34396	6.057	5.91102	6.14311	6.02122	5.69861	6.20249	5.95613
ENSG00000113594	LIFR	5.51183	5.67622	7.36587	6.79641	6.42891	6.95849	6.84061	3.26566	3.77046	3.86073	4.61378	4.44472	3.93278	3.56415	3.39213	3.64718	2.85494	3.62037	3.89939	3.01617	3.40789
ENSG00000050767	COL23A1	5.51042	5.54326	5.118	4.98379	5.07512	5.29251	5.16117	-3.71999	-3.59904	-1.40539	-0.0283995	0.833564	-0.816581	-1.13687	-5.07256	-5.19266	-7.62786	-6.31872	-4.77593	-3.92857	-4.71058
ENSG00000166913	YWHAB	5.51042	5.18752	5.53418	5.52253	5.3771	5.36888	5.47987	5.59425	5.47705	5.60741	5.60018	5.86675	5.52946	5.65969	5.64009	5.58952	5.28184	5.4573	5.17681	5.49739	5.60158
ENSG00000150995	ITPR1	5.50902	5.08049	5.18104	5.82384	5.04905	5.4225	5.18108	1.75033	1.85741	2.44848	1.82694	1.77616	1.82765	1.65768	1.86324	1.38326	1.99236	1.74558	1.73762	1.53242	1.24995
ENSG00000149573	MPZL2	5.50902	5.57996	6.16732	6.02353	5.65922	6.04277	5.98445	2.07183	2.66434	4.09997	3.78442	3.52848	2.59292	2.38086	2.5474	1.1038	2.6165	1.68691	1.52785	1.47515	1.50418
ENSG00000019144	PHLDB1	5.50761	4.61127	5.14896	4.97993	3.31062	4.56856	4.68531	5.05546	4.99783	4.81935	4.48116	4.60615	4.70678	5.30505	5.13742	5.06261	5.02386	5.04414	4.64977	5.12244	4.81778
ENSG00000143515	ATP8B2	5.50761	5.4272	4.79538	5.89898	4.78829	5.37178	5.38064	4.62431	4.49947	4.8441	4.49213	4.64019	4.65863	4.47176	4.69822	4.66439	4.72059	4.39696	4.60404	4.64543	4.42268
ENSG00000145730	PAM	5.50761	5.79344	5.8568	6.00562	5.42249	6.04967	5.94672	4.22994	4.09951	4.77463	4.44271	4.34057	4.25076	4.01016	4.76372	4.88336	4.88907	4.98981	5.2443	4.35925	4.43199
ENSG00000064932	SBNO2	5.50338	6.37041	5.6029	5.54881	4.93218	5.2974	5.16689	3.85744	3.44635	3.86514	3.7028	3.72881	3.86911	3.77448	3.80527	3.72561	3.88931	3.85829	4.07383	3.79837	3.57019
ENSG00000111897	SERINC1	5.50338	6.24743	6.72971	6.41364	6.19529	6.49977	6.52829	4.1857	4.38603	4.50517	4.89121	4.69049	4.70597	4.34371	4.2019	4.21461	3.90206	4.1587	4.65662	4.35087	4.8192
ENSG00000131196	NFATC1	5.50338	3.59278	6.33512	5.33187	3.86303	4.86979	5.03398	2.20443	1.66604	1.88392	2.04464	2.4321	2.29423	2.03306	2.0582	2.14541	2.17788	2.0693	2.32019	2.06173	1.41307
ENSG00000130175	PRKCSH	5.4963	5.64191	5.17398	5.65304	5.27131	5.14557	5.27143	5.51379	5.37015	5.25651	5.0921	5.13954	5.12722	5.46427	5.73007	5.65393	5.65855	5.65223	5.61062	5.34211	5.20244
ENSG00000173812	EIF1	5.49346	5.05308	6.1753	5.19711	6.10538	5.91328	5.81364	4.91639	4.67242	4.45346	4.83006	5.46839	4.32119	4.67659	4.42643	4.97351	4.19192	3.73792	3.46031	4.44087	3.70765
ENSG00000182240	BACE2	5.49061	5.75606	4.29374	5.27212	4.43798	5.34722	5.10122	3.94819	3.559	4.81844	4.45709	4.37964	3.24101	3.31918	4.47791	4.14942	4.1815	4.62062	4.45049	3.344	3.3599
ENSG00000118705	RPN2	5.48919	6.0224	5.49644	5.82921	5.2668	5.20015	5.54773	6.14162	5.94733	6.2225	5.91802	6.01397	6.15069	5.96875	6.17359	6.05515	6.15011	5.83135	5.88496	6.1238	5.91952
ENSG00000184347	SLIT3	5.48919	2.99957	4.08729	3.54816	4.94166	4.97738	4.95522	-1.74424	-1.22558	-1.88405	-0.733202	1.77616	0.937962	-0.129448	-1.25056	-3.81415	-2.34246	-1.63689	-1.72756	0.297494	-2.49759
ENSG00000079246	XRCC5	5.4849	6.04977	5.50491	5.72204	5.4157	5.51521	5.72727	6.49651	6.54202	6.52221	6.47218	6.54713	6.72962	6.59463	6.33296	6.34058	6.35949	6.56793	6.25443	6.71404	6.6851
ENSG00000089159	PXN	5.48204	4.85877	6.18149	6.06388	5.40341	4.88612	5.02062	5.70809	5.5937	5.9	5.4082	5.94164	5.41075	5.71327	5.56781	5.6264	5.6417	5.2689	5.15817	5.51821	5.06735
ENSG00000092964	DPYSL2	5.48204	5.8747	5.50772	5.90068	5.34317	5.72725	5.66146	5.58364	5.58245	6.61272	5.55613	5.67736	5.24366	4.9136	6.01367	6.04563	6.23235	5.72351	6.17291	5.8302	5.96546
ENSG00000125868	DSTN	5.4806	5.66144	6.6428	5.80106	5.79511	6.2948	6.57768	3.90499	4.30621	4.58743	4.88475	5.10181	4.68517	4.5843	4.12676	4.51643	3.84229	4.13146	4.37451	4.48465	4.82204
ENSG00000067182	TNFRSF1A	5.47917	5.84448	5.92785	5.63148	5.14243	5.20732	5.48045	4.91688	4.5279	4.60016	4.61991	5.23172	4.75924	4.6472	4.63997	4.47729	4.31355	4.1044	4.31033	4.53884	3.8713
ENSG00000107438	PDLIM1	5.47917	4.79626	4.49431	4.97024	4.45396	4.92932	4.44294	3.97721	3.76728	4.63514	3.88683	4.8608	3.58545	2.83971	3.76078	4.20609	4.34116	3.76032	4.48382	3.51397	2.45843
ENSG00000144655	CSRNP1	5.47629	6.45258	7.11269	5.72319	6.66295	6.52032	6.68369	2.60314	2.42333	2.60201	2.48878	2.47209	2.58589	2.26744	2.53688	2.60565	2.52569	2.6189	2.14294	2.57922	2.51386
ENSG00000054654	SYNE2	5.47629	5.39382	6.81681	6.26989	6.36553	6.12627	6.15525	3.08994	3.72535	3.84655	4.05824	3.58731	3.35179	3.39572	3.17875	3.1463	4.09708	4.65019	4.26075	3.68719	3.58613
ENSG00000157570	TSPAN18	5.47197	2.56393	5.34577	4.86748	5.1209	5.40447	5.10718	4.01472	3.73351	3.81503	3.22429	3.74522	2.61552	2.68002	4.59202	4.63357	3.5907	2.9736	3.91153	2.30024	2.76589
ENSG00000164619	BMPER	5.47197	4.27507	4.67288	3.38463	4.4082	5.24327	4.18285	-2.01217	-1.08119	-0.149449	2.27952	3.16772	1.44839	0.024773	-2.92572	-3.60769	-4.16843	-3.14879	-1.93158	-2.89463	-3.52616
ENSG00000187513	GJA4	5.47197	4.85083	4.26076	4.63782	3.30476	4.9309	4.41438	3.00521	2.29247	0.735962	0.896499	1.48192	0.870191	0.176111	4.38599	3.92576	1.92096	2.20092	3.41255	-0.613533	0.120005
ENSG00000144810	COL8A1	5.46473	6.60881	5.72519	5.19933	6.27919	6.93846	6.59952	4.91204	5.83767	4.87281	7.76925	7.52106	8.07595	5.31698	4.05119	3.50986	2.49496	4.9607	5.75767	6.22462	3.50903
ENSG00000155660	PDIA4	5.46473	6.5781	5.51892	5.43129	5.19411	5.21897	5.42426	6.41606	6.15782	6.12709	5.83594	5.85735	6.37865	6.40493	6.47482	6.3029	6.41969	6.44539	6.30918	6.41894	6.39705
ENSG00000213088	ACKR1	5.46473	7.74602	4.67788	6.6614	0.994533	3.04695	4.67029	-4.45695	-3.88855	-5.49286	-0.710659	-1.35179	-6.50774	-1.95542	-1.90263	-5.92962	-7.62786	-4.20324	-3.84304	-3.3667	-3.52616
ENSG00000085733	CTTN	5.46183	4.98349	5.07311	5.23376	4.63079	5.11402	5.06952	5.8467	5.48915	5.60294	5.53152	5.53046	5.81541	5.88057	5.92754	5.91391	5.86211	5.7693	5.72618	5.6913	5.57619
ENSG00000123066	MED13L	5.46183	5.31312	5.53556	5.54577	5.95436	5.40447	5.58771	4.29756	4.08428	4.07814	4.13259	3.95728	4.16203	3.99751	4.34379	4.16621	4.44728	4.30608	4.44082	4.25819	4.21881
ENSG00000179820	MYADM	5.46183	4.40692	6.20854	5.62243	5.08884	5.16845	5.66247	4.52762	4.50806	5.2008	4.76017	5.40439	4.80003	4.91942	4.52283	4.302	4.48555	3.81785	3.84379	4.62107	3.62643
ENSG00000089327	FXYD5	5.46038	3.89045	5.17575	5.72895	4.96787	4.54612	4.41798	4.7293	4.70516	4.88977	4.50903	5.18336	4.63032	4.76282	4.86765	4.31633	4.4196	3.92247	3.93926	4.54774	3.83386
ENSG00000147140	NONO	5.46038	5.62424	5.29943	5.62367	5.29517	5.52879	5.40444	6.39558	6.11161	6.23787	5.90667	6.01171	6.12986	6.14577	6.31815	6.10323	6.33765	6.26319	6.18045	6.20872	6.05708
ENSG00000066735	KIF26A	5.45892	4.94469	5.0674	5.59242	4.41638	5.30532	5.00075	3.14873	3.0721	3.46076	3.31772	2.70803	3.16527	2.95758	2.82831	3.06944	3.05776	3.34009	3.57722	3.00834	2.76883
ENSG00000072778	ACADVL	5.45892	5.27587	5.23976	5.32022	4.41638	4.76858	4.72558	5.55007	5.50687	5.50672	5.42738	5.20131	5.5816	5.45505	5.71079	5.58887	5.61486	5.4595	5.53355	5.39067	5.07003
ENSG00000197324	LRP10	5.45892	5.54147	4.8933	5.43693	6.28068	5.12094	5.20699	5.45544	5.11364	5.3878	4.87872	4.83548	4.89509	4.83852	5.65013	5.60387	5.43131	5.30836	5.54446	5.16103	4.99002
ENSG00000131711	MAP1B	5.456	5.82288	4.03364	4.12237	5.04201	4.58366	4.89792	7.43774	7.31392	7.66944	7.33496	7.82515	7.37754	7.40113	7.43831	7.22124	7.52399	7.21595	6.91205	7.27585	6.85889
ENSG00000141959	PFKL	5.44869	5.04044	5.13447	5.56306	4.78829	4.91028	5.33757	5.26471	4.93482	5.27351	4.75612	4.46137	4.82187	4.99857	5.60629	5.64954	5.44678	5.24718	5.28612	5.05673	5.06465
ENSG00000118816	CCNI	5.44722	4.69266	5.9173	5.50697	6.30071	5.83087	5.83624	4.50079	4.64067	4.69721	4.85294	5.29532	4.48685	4.53789	4.58947	4.98501	4.53861	4.90589	4.75634	4.50188	4.58048
ENSG00000128731	HERC2	5.44281	5.45461	6.56524	5.94654	6.51015	6.67638	6.54018	4.15161	4.1936	3.88349	3.94389	3.93361	3.93968	4.02602	4.1013	4.01436	4.37811	4.23938	4.01405	4.08982	3.68602
ENSG00000175727	MLXIP	5.44281	4.52319	4.08729	4.857	4.61429	4.59959	4.33026	4.75871	4.16493	4.19958	4.13337	4.91741	3.99177	4.18841	4.74053	4.73482	4.23903	4.06607	4.067	4.26054	3.68758
ENSG00000110955	ATP5F1B	5.44134	5.51111	5.35361	5.74647	5.51556	5.36364	5.46312	6.95732	6.80174	6.89887	6.85087	6.99936	7.07624	6.72105	6.78003	6.7635	6.75766	6.5254	6.63727	6.93859	6.78786
ENSG00000149428	HYOU1	5.44134	5.56592	4.97079	5.00166	4.68598	4.37844	4.55402	6.25069	5.93747	5.48113	5.41623	5.52175	5.86503	5.92978	5.96763	5.72397	5.59176	5.60399	5.09878	5.73921	5.32946
ENSG00000122566	HNRNPA2B1	5.43986	4.76049	6.33432	4.8143	5.19093	5.46117	5.22217	5.69997	6.1696	5.71452	6.35768	6.50076	6.07385	6.157	5.43169	6.10895	5.47132	5.63342	5.55916	6.09874	6.31864
ENSG00000170348	TMED10	5.43986	5.48989	6.23595	5.91051	5.54322	5.87859	5.93169	5.41015	5.51067	5.595	5.61894	5.69507	5.64971	5.46519	5.5822	5.49367	5.39952	5.44795	5.42408	5.44491	5.70583
ENSG00000112759	SLC29A1	5.43543	4.58888	4.64248	5.16689	4.90142	4.66542	5.04022	5.7653	5.38058	5.66916	5.57603	5.93689	5.871	6.13907	5.83208	5.47392	5.49674	5.23539	5.10935	5.92206	5.75229
ENSG00000138185	ENTPD1	5.43543	5.33915	6.01546	5.7794	4.66553	5.44307	5.35833	2.50112	1.98319	2.93089	3.15999	3.01819	2.16821	2.21596	3.04118	3.56557	2.24404	2.70827	3.91471	1.14467	1.90814
ENSG00000189091	SF3B3	5.43543	5.28554	4.79768	5.25892	5.17655	4.99028	4.8719	5.81126	5.88313	5.86503	5.61364	5.70139	5.78141	5.88356	5.77841	5.47818	5.95251	5.85901	5.64202	5.82464	5.70122
ENSG00000231925	TAPBP	5.43543	4.89992	4.84961	5.39698	5.29813	4.77649	5.01112	3.95761	3.57906	4.37226	4.03342	4.24187	3.87272	3.70357	4.34499	4.11977	4.57946	4.27902	4.75386	3.81	3.65136
ENSG00000130158	DOCK6	5.43394	4.31653	5.23298	5.08664	4.3722	4.79131	4.28234	5.34305	5.17784	5.47423	3.917	4.37437	3.98511	4.43095	5.52137	5.54188	6.04423	5.83262	5.71857	4.76806	4.70324
ENSG00000158195	WASF2	5.43394	4.44001	4.92311	5.02805	6.11379	5.03931	4.72073	5.09315	4.76131	5.10389	4.74648	5.14677	4.11461	4.36618	5.02076	5.0282	4.78973	4.46401	4.54416	4.3667	3.97241
ENSG00000104067	TJP1	5.43246	4.90968	5.29943	5.38827	4.91303	5.41633	4.97897	5.37752	5.00121	5.24473	4.62657	5.01425	4.62261	4.80311	5.77327	5.41966	5.3236	5.5878	5.79763	5.03212	5.05805
ENSG00000111145	ELK3	5.43246	4.25879	5.63542	5.09558	4.90336	5.01945	5.30941	4.42671	4.26964	4.1607	4.02589	4.45805	3.80552	3.87839	4.92563	5.31415	4.60306	4.79828	5.15279	4.32634	4.32209
ENSG00000118058	KMT2A	5.43098	4.0937	5.27652	4.94209	5.43328	5.05745	4.98141	4.39445	4.46362	4.55509	4.10665	4.40912	3.8835	4.0758	4.39766	4.09506	4.80337	4.56876	4.47652	4.13161	3.76257
ENSG00000091986	CCDC80	5.42949	5.25032	5.29129	5.34042	5.21145	5.84932	5.55592	1.90255	1.57453	1.31707	2.62573	3.04936	2.17759	1.54167	2.48968	2.36653	1.55453	1.64899	2.82736	2.37347	2.36818
ENSG00000137497	NUMA1	5.428	5.45175	5.55065	5.57548	5.14243	5.24833	5.47987	4.7293	4.70682	4.59699	4.28899	4.20478	4.34062	4.48994	4.89919	4.82443	5.02834	4.98221	5.0011	4.55121	4.58758
ENSG00000169504	CLIC4	5.42054	5.36218	5.76454	5.45603	4.89753	5.59538	5.91989	5.79611	6.26978	6.49092	6.4123	6.30987	5.90615	6.12518	5.92875	6.04801	5.71796	5.80659	6.00297	5.86654	6.78405
ENSG00000108518	PFN1	5.41755	5.30364	4.72941	5.29197	5.15715	4.68329	5.00953	6.98731	6.91603	7.15122	6.71489	6.9027	6.91935	7.00569	6.84049	6.68685	6.77482	6.33748	6.46903	6.92967	6.60688
ENSG00000108953	YWHAE	5.41605	5.55085	5.47647	5.51455	5.11085	5.33953	5.31393	6.47239	6.15083	6.37465	6.23839	6.61975	6.23898	6.37737	6.30736	6.2427	6.01408	6.03856	5.78762	6.1754	6.0259
ENSG00000111912	NCOA7	5.41455	5.99385	5.28475	5.20815	5.40615	5.86753	5.95418	2.24194	2.19656	2.30804	2.63896	2.80515	2.56996	2.56128	2.2168	2.34184	2.1811	2.34068	2.14077	1.89707	1.30774
ENSG00000204463	BAG6	5.41455	4.93925	5.04239	5.2504	5.48736	4.89422	5.06416	5.82188	5.67264	5.70424	5.0707	5.40697	5.41497	5.54327	5.78908	5.62513	5.94638	5.6414	5.71784	5.54339	5.32021
ENSG00000060982	BCAT1	5.41004	5.208	6.11846	5.77123	5.70558	6.5106	5.78139	5.77813	6.36635	6.12709	6.2752	6.27874	6.2583	6.06078	5.78398	5.98738	5.58022	5.82605	6.04215	6.10387	6.8346
ENSG00000184588	PDE4B	5.41004	6.61585	7.15638	5.74002	6.29924	5.82495	6.5269	4.91494	4.71095	4.77837	3.78144	3.69823	3.69234	4.02685	4.59455	4.48012	4.85166	4.76631	4.48424	4.24968	4.56956
ENSG00000116560	SFPQ	5.40551	5.46929	5.64312	5.36232	4.84798	5.10218	5.02062	6.04278	6.41384	5.89505	6.08838	6.1537	6.12017	6.20748	5.88589	6.02372	5.89754	6.06544	5.99444	6.26987	6.23493
ENSG00000124772	CPNE5	5.40551	3.97654	4.35126	3.80088	4.3778	4.31591	3.888	1.61391	1.21299	0.133582	0.327962	0.70524	-0.691826	0.743002	2.29376	1.79603	1.03391	2.25997	1.20966	0.7371	0.956691
ENSG00000125968	ID1	5.404	5.92058	6.31759	5.76788	5.55438	6.00774	6.40791	3.36252	3.73676	3.89731	4.44522	4.10446	5.22711	5.16088	3.47709	3.26431	3.56011	4.05741	3.46725	4.69574	3.83666
ENSG00000141756	FKBP10	5.40248	5.24647	4.72941	4.5981	4.84798	5.08247	5.06799	5.42007	5.13905	4.832	4.7647	4.68624	5.00911	4.97209	5.80626	5.63023	5.49156	5.47258	5.50664	5.38463	5.06944
ENSG00000185070	FLRT2	5.40248	5.23321	5.33947	4.31844	5.01533	4.6758	4.97572	4.57494	5.06209	3.69944	4.75916	4.42618	4.88583	4.1832	4.8781	5.01216	3.79997	3.93513	4.59733	4.29313	4.03303
ENSG00000184743	ATL3	5.40097	5.50606	5.76336	5.61	5.31573	5.90087	5.92411	4.55085	4.79211	4.9311	5.33627	5.30273	5.02867	4.84372	4.82852	4.72948	4.66475	4.35812	4.92057	4.87679	5.30433
ENSG00000099875	MKNK2	5.39945	5.89589	5.50632	5.8983	5.64653	5.55355	5.58824	4.65592	4.23672	4.33083	3.95803	4.02157	4.09928	3.75658	5.03466	4.94868	4.8871	4.93296	4.98608	4.10144	3.80977
ENSG00000007202	KIAA0100	5.39489	5.23265	4.57433	5.35936	5.01892	4.91586	5.12931	5.7039	5.59639	5.81081	5.45007	5.85294	5.77756	5.62695	5.73307	5.65079	5.80794	5.32077	5.43075	5.56985	5.35612
ENSG00000033327	GAB2	5.39184	4.76049	4.89115	5.18376	4.60954	4.85161	5.02614	4.09123	4.00425	4.40226	3.73087	3.86519	3.81155	3.83165	4.20057	4.10334	4.2809	4.18146	4.16472	3.77483	3.63129
ENSG00000100596	SPTLC2	5.39184	5.73111	5.78556	5.57761	5.71998	6.20358	5.67907	4.47148	4.58042	4.84722	5.06622	5.08579	4.75023	4.6955	4.42985	4.7265	4.53924	4.58391	5.18447	4.67116	4.82875
ENSG00000167004	PDIA3	5.39031	6.01822	5.89384	5.79229	5.44666	5.31681	5.55429	5.84746	5.84108	5.81923	5.78727	6.15062	5.91931	5.90381	5.99938	5.87384	5.71185	5.99973	5.87895	5.9137	5.77717
ENSG00000096433	ITPR3	5.38726	3.10041	4.09105	4.4178	3.6202	4.28913	3.99312	4.72434	4.77482	5.71745	4.87454	5.85986	5.17569	4.74073	5.19607	5.62128	5.3578	4.75698	4.92845	5.15269	4.71702
ENSG00000077157	PPP1R12B	5.38572	5.41355	4.73902	5.16971	5.24246	5.48174	5.56461	1.43652	1.1942	1.17674	1.62905	1.35935	1.15285	1.28281	1.13411	0.67029	1.36366	1.27871	1.10672	1.06928	0.745866
ENSG00000087266	SH3BP2	5.38572	4.76126	4.50843	4.94143	4.92264	4.84828	4.55293	4.10656	3.97702	4.21898	4.08023	4.06143	3.9717	3.84583	4.25676	4.3044	4.17263	3.97934	4.43198	4.16619	3.89372
ENSG00000167986	DDB1	5.38572	5.71768	5.11246	5.37756	5.9164	5.14285	5.33883	6.37039	6.2915	6.23481	5.94556	5.9159	6.23239	6.07027	6.20597	6.14552	6.41268	6.26836	6.24246	6.25364	6.11618
ENSG00000173327	MAP3K11	5.38572	5.17832	5.27322	5.17422	4.91303	5.37352	5.40201	4.8251	4.58403	4.68481	4.5799	4.53558	4.33853	4.45274	4.76732	4.98052	4.67734	4.4525	4.71975	4.6262	4.42221
ENSG00000257923	CUX1	5.38572	4.75122	4.42456	5.02681	5.10749	4.62415	4.85074	3.36393	2.91451	2.90375	2.90474	3.15139	2.64454	3.02228	3.67515	3.65346	3.70249	3.50412	3.31202	3.19825	2.81654
ENSG00000111676	ATN1	5.38419	3.48127	5.50772	4.77105	4.65635	4.54406	4.10903	4.43415	4.083	4.25366	3.89052	4.92343	3.72548	4.15463	4.31022	4.34999	4.19829	3.48595	3.68908	3.76757	2.98923
ENSG00000197958	RPL12	5.38419	6.24881	5.35517	5.79412	5.61251	5.99537	5.99935	5.90584	6.21664	5.95454	5.83546	5.78512	5.92871	5.89429	5.77483	5.96153	6.1219	6.12327	6.16105	5.89016	5.79171
ENSG00000077238	IL4R	5.38266	5.37934	4.30672	5.03303	4.34102	4.35046	4.53314	3.8041	3.85965	3.76123	3.55598	3.29949	3.06401	3.96236	4.20655	3.85991	3.96972	3.9469	3.8223	3.38171	3.97751
ENSG00000164574	GALNT10	5.38266	4.86595	4.96056	5.78051	5.44932	5.25652	5.32611	4.46885	3.85217	3.81047	4.28269	4.15447	4.38227	4.47724	4.53556	4.12159	4.0678	4.20321	3.93613	4.46558	4.72651
ENSG00000147454	SLC25A37	5.3765	5.81548	5.18632	4.99403	8.92652	4.68796	4.89448	3.69449	3.74808	3.70829	3.7143	3.96197	3.78189	3.97015	4.06297	3.88362	3.99373	3.85745	3.92294	3.88154	3.73048
ENSG00000157933	SKI	5.3765	3.9858	5.66723	4.98763	5.27131	5.0846	5.07028	3.75087	3.36465	3.47696	3.72054	4.25339	3.30871	3.94578	3.50541	3.78748	3.16574	3.03222	2.86465	3.30892	2.68095
ENSG00000131473	ACLY	5.37496	5.18866	4.8825	5.33338	4.76285	4.75174	4.86488	6.502	6.28096	6.51256	6.04826	6.18009	6.31317	6.27436	6.17189	6.10804	6.40479	6.23643	6.37849	6.24938	5.91571
ENSG00000111642	CHD4	5.37187	5.45651	5.05206	5.16576	5.30989	5.23692	5.3165	5.4634	5.34428	5.26053	5.17426	5.31102	5.37554	5.37517	5.36787	5.23549	5.53469	5.62807	5.4734	5.41794	5.20163
ENSG00000221968	FADS3	5.37187	4.92282	4.57164	5.18208	3.44998	4.15806	4.23685	4.67261	4.58854	4.93278	4.78764	4.45307	4.76625	4.50967	4.7193	4.35539	4.98201	4.95216	4.62786	4.8169	4.72726
ENSG00000172572	PDE3A	5.37032	4.79701	5.31397	5.02244	6.11463	5.02019	5.38249	3.54867	4.03759	3.79116	4.24282	3.91681	4.24352	3.82499	3.35191	3.11386	3.03658	3.60064	3.05524	3.8042	3.84992
ENSG00000075275	CELSR1	5.36877	4.10345	5.11431	5.53748	4.90917	4.97433	5.43022	1.04908	1.85142	2.48785	1.94167	1.93719	1.29316	1.24906	0.708801	0.820805	-0.389459	0.339493	0.307674	-0.145966	-1.13659
ENSG00000133056	PIK3C2B	5.36722	4.16412	5.11061	4.67886	4.72822	5.05528	4.19689	3.52857	3.08746	3.43847	3.40288	3.71499	2.85493	2.54051	4.03335	3.94536	3.66848	3.46428	4.41143	2.11894	2.0672
ENSG00000177731	FLII	5.36722	5.54952	5.06358	5.29249	4.63547	4.86732	4.87015	5.51091	5.34054	5.68966	5.5324	5.50418	5.44754	5.28957	5.74111	5.60776	5.84318	5.58177	5.57592	5.41921	5.15149
ENSG00000091592	NLRP1	5.36411	4.79325	5.6029	4.88271	4.88972	4.76063	4.4721	4.63316	4.34614	4.15208	4.0434	3.99665	3.445	4.09413	4.76236	4.4283	4.64564	4.76054	4.64173	3.58337	3.94925
ENSG00000249669	CARMN	5.36411	3.16935	1.79883	5.2956	2.43664	3.12885	4.22868	-4.45695	-7.05847	-2.86059	-5.39996	-3.49863	-4.39227	-2.6075	-3.4876	-5.92962	-3.37994	-3.99679	-6.6504	-4.07296	-5.00009
ENSG00000104852	SNRNP70	5.36255	5.0493	4.81368	4.78512	4.40547	4.79996	4.42277	5.1935	5.3043	4.9851	4.99129	4.61808	5.26636	5.39009	5.29048	5.33775	5.15329	5.21801	5.18552	5.2225	5.18465
ENSG00000125378	BMP4	5.36255	4.97422	5.32996	4.62223	6.30145	5.85348	5.66903	3.79991	3.53305	2.75981	4.58787	4.06797	4.1448	3.37631	3.40607	2.59001	3.29174	3.50199	3.79358	3.81064	3.34223
ENSG00000170889	RPS9	5.361	6.46894	5.15436	5.86103	5.76979	5.88552	6.1802	5.79847	5.56381	5.43596	5.61253	5.24812	5.62765	5.61926	5.67743	5.67261	5.71823	5.84042	5.50558	5.61786	5.52467
ENSG00000105976	MET	5.35944	4.51682	5.75035	5.53617	5.1604	5.72861	5.3293	4.27286	4.87042	5.27185	5.08325	5.29346	4.69336	4.52972	4.00235	3.76096	4.43385	4.17947	4.11751	3.98545	3.96088
ENSG00000169398	PTK2	5.35944	5.17601	5.20724	5.41661	4.92455	5.32162	5.1832	5.35201	5.11864	5.49569	4.89259	5.27944	4.92984	5.18488	5.34122	5.33306	5.27583	5.25824	5.05768	5.21451	5.23233
ENSG00000011304	PTBP1	5.35788	4.57318	4.985	5.08544	4.7128	4.79909	4.61594	6.0754	6.10124	6.05047	5.98148	6.29369	6.03037	6.21132	5.92553	5.95289	5.99362	5.59778	5.54569	6.03508	5.76819
ENSG00000137507	LRRC32	5.35475	5.77944	5.8992	4.98443	4.61429	4.77386	5.33376	4.29979	3.63589	4.03813	3.8051	4.59714	3.49835	3.80674	4.45464	4.40911	3.82489	3.84577	4.8792	3.421	3.22498
ENSG00000155254	MARVELD1	5.35475	4.05528	4.81822	4.93944	4.72602	4.68516	4.93358	4.06791	3.80958	4.04591	3.64389	3.87268	3.47001	3.83829	4.30465	4.2988	4.08767	3.72248	4.13233	3.8754	3.74699
ENSG00000159842	ABR	5.35318	4.84721	4.75332	5.08304	4.60716	4.96282	4.65613	4.05216	3.7925	4.18345	4.39543	4.51339	4.34739	4.07901	3.89775	3.98277	4.19271	3.9121	4.02056	4.21414	3.74325
ENSG00000130396	AFDN	5.35004	4.75277	5.71427	5.26422	4.75642	5.39594	4.68232	4.25844	4.54191	4.51473	4.44145	4.5102	4.12495	4.16371	4.51374	4.44867	4.53421	4.42415	4.61463	3.94911	4.1505
ENSG00000185201	IFITM2	5.35004	4.15828	5.10133	4.95328	5.51174	4.14183	4.3717	3.47181	3.24873	4.54469	3.54666	4.27615	3.35902	3.18432	3.41643	3.16929	3.8504	2.57509	3.08488	3.0405	2.26357
ENSG00000130726	TRIM28	5.3469	5.30733	4.6322	5.05153	5.03848	4.89584	4.93943	6.33303	6.23284	6.00669	6.10873	6.27592	6.16092	6.28134	6.11841	6.21748	6.2604	6.16115	5.83048	6.24582	6.07561
ENSG00000142156	COL6A1	5.3469	5.76107	5.06931	4.83153	5.11421	5.45899	5.68107	2.21075	2.43539	2.0006	2.65424	1.73293	2.3698	2.60641	2.73755	2.97426	1.81715	3.3543	3.04831	2.81418	2.64617
ENSG00000153827	TRIP12	5.34375	5.23376	5.41034	5.29456	6.01218	5.33715	5.42546	5.75939	5.67518	5.66234	5.65546	5.91651	5.70991	5.74187	5.65961	5.59704	5.52331	5.57623	5.37255	5.62629	5.55546
ENSG00000131018	SYNE1	5.34217	5.23043	4.98298	5.40275	5.50409	5.03565	5.2487	2.57402	2.55808	4.12149	4.58958	4.37788	3.52246	3.06007	2.96165	2.56357	3.50206	3.51259	3.10838	2.59723	2.42897
ENSG00000156030	ELMSAN1	5.34217	5.16848	5.66218	5.39021	4.7304	4.85576	5.20976	3.95008	4.08555	4.12075	4.15808	4.24956	4.04717	4.30522	3.92139	3.97476	4.13161	3.75051	3.60109	4.23394	4.07286
ENSG00000168137	SETD5	5.34217	4.24454	4.91678	4.90187	4.79458	4.8034	4.65206	4.89448	4.74122	4.68182	4.54402	4.76346	4.5927	4.64395	4.75104	4.62273	4.98339	4.79046	4.71063	4.58167	4.25336
ENSG00000075415	SLC25A3	5.33901	6.40606	5.12351	5.65587	5.51429	5.85514	5.93379	6.37145	6.30114	6.44356	6.52715	6.35155	6.70915	6.42443	6.35677	6.4282	6.43881	6.56666	6.6364	6.64728	6.6212
ENSG00000005884	ITGA3	5.33742	4.69911	4.91041	5.18989	4.55376	4.82305	5.26478	3.9623	3.93518	4.35733	4.13337	4.49248	4.14061	3.88939	4.75875	4.61438	4.24212	3.99982	4.17164	4.34244	4.25231
ENSG00000221983	UBA52	5.33742	6.04598	5.00704	5.84979	6.77324	5.49831	5.72872	6.37796	6.01918	6.16776	5.87255	5.84217	6.04629	5.98486	6.26848	5.89414	6.08499	5.91959	5.83199	6.06207	5.80628
ENSG00000054598	FOXC1	5.33266	4.47236	5.93414	5.15781	5.20674	5.76218	5.31714	2.14626	2.12392	2.31321	2.51293	3.04936	2.8059	2.4369	2.52416	2.2048	1.7921	2.48541	2.47975	1.77582	1.50064
ENSG00000198399	ITSN2	5.32948	5.17947	5.55337	5.36775	4.96787	5.32102	4.96181	3.4953	3.52179	3.76217	3.96067	3.89	3.65758	3.56643	3.59936	3.3627	3.51361	3.58366	3.60896	3.36079	3.53519
ENSG00000085276	MECOM	5.32788	5.24482	5.26326	5.62532	5.20359	5.44913	5.00395	4.99265	4.63719	5.0028	4.89029	4.84693	4.79547	4.47906	5.03017	4.62656	4.95592	5.18428	5.23619	4.6411	4.68972
ENSG00000144028	SNRNP200	5.32469	4.62318	4.98701	4.74855	5.1209	5.02389	4.93106	5.62564	5.32388	5.32237	5.07233	5.40267	5.14585	5.35184	5.47337	5.44342	5.67606	5.34291	4.98366	5.27774	4.9783
ENSG00000112306	RPS12	5.32149	7.15763	5.77625	5.90408	6.35918	6.33075	6.68916	5.7736	5.80823	5.47883	6.02683	5.78114	6.08199	5.83509	5.66034	6.11875	5.92876	5.88534	6.06034	6.29123	6.37211
ENSG00000048707	VPS13D	5.31507	4.83409	4.93988	5.08903	5.27432	5.04149	5.1446	3.94913	3.90948	4.04358	3.89604	3.79073	3.82579	3.96062	3.97223	3.75746	4.38092	4.42134	4.24921	4.06578	3.78673
ENSG00000172270	BSG	5.31507	5.67785	5.39066	5.79705	7.56776	5.29496	5.58237	6.10624	5.95851	6.1313	5.63525	5.69084	5.87659	5.81481	6.23456	6.31325	6.19002	5.98097	6.12158	6.07055	5.77186
ENSG00000136603	SKIL	5.31184	5.31049	7.10435	5.74154	6.00406	6.19443	6.52384	3.42637	3.73025	2.92077	3.99536	3.80384	4.00038	4.18097	3.53741	3.43888	3.01148	3.58265	3.09051	3.98887	4.63714
ENSG00000142669	SH3BGRL3	5.31184	3.29595	3.71609	4.58715	3.86701	3.72521	3.66575	4.90523	4.57316	5.23761	4.49516	5.54146	4.49296	4.83237	5.16567	4.66003	4.55422	3.88545	4.1405	4.48021	4.06031
ENSG00000187239	FNBP1	5.31184	4.58888	5.60946	5.50025	5.42114	5.45954	5.19794	3.23498	3.24417	3.83222	3.84844	4.31148	3.62111	2.93299	3.30929	3.2378	3.19789	3.28429	3.80869	3.05469	2.19303
ENSG00000182326	C1S	5.31023	6.77687	4.4156	4.89847	4.60239	4.63482	3.82611	-4.45695	-5.47351	-1.62496	0.294922	-0.0392008	-1.52285	-3.34446	-2.32533	-3.60769	-3.92742	-3.14879	-4.53492	-4.07296	-3.7777
ENSG00000197226	TBC1D9B	5.31023	5.17717	5.22616	5.18096	4.75857	5.11263	4.99272	4.7506	4.47923	4.86711	4.8073	4.77683	4.71364	4.7382	5.0132	5.03832	4.9578	4.81464	4.77674	4.76209	4.54402
ENSG00000107581	EIF3A	5.30862	5.24922	5.20724	5.17759	5.00813	5.05456	5.00714	5.94333	5.85535	5.87554	5.88394	5.83835	5.88913	6.0831	5.7999	5.76981	5.65421	5.84147	5.53024	5.82337	5.73114
ENSG00000184014	DENND5A	5.307	5.2748	4.70019	5.40563	4.86203	4.75797	4.7704	4.81632	4.59213	4.92352	4.73729	4.8482	4.94398	4.76928	4.99564	4.72829	4.80546	4.73453	4.59456	4.7065	4.53756
ENSG00000158711	ELK4	5.30376	4.54124	6.03705	5.41519	5.58253	5.82071	5.63024	4.58835	4.58854	4.61593	4.75815	4.82136	4.33696	4.33166	4.85501	4.74604	4.5598	4.81891	5.17151	4.32589	4.85634
ENSG00000111252	SH2B3	5.29888	4.82159	5.03851	5.41233	5.10917	5.17843	4.94527	5.98795	5.83236	5.99166	5.61253	6.06497	5.75131	5.79983	6.08524	5.98314	5.9812	5.97005	5.81628	5.90605	5.76745
ENSG00000115977	AAK1	5.29888	4.56966	5.15974	4.78953	5.1685	4.94188	4.80747	4.47214	4.71013	4.80704	4.73216	5.10817	4.67154	4.68607	4.39883	4.11523	4.62982	4.49373	4.727	4.33799	4.07524
ENSG00000155366	RHOC	5.29888	5.67907	4.86725	5.42893	4.3778	4.79823	5.10271	6.37021	6.14381	6.40854	6.10794	5.8542	6.1864	5.96269	6.56206	6.24103	6.15319	6.07351	5.82559	6.09676	5.93908
ENSG00000143776	CDC42BPA	5.29726	4.65503	5.45038	5.02681	5.18456	5.3144	5.27077	4.97466	4.78427	5.13705	5.12027	5.03442	4.84596	4.67022	5.23984	4.91299	5.02476	5.41782	5.38268	5.02687	5.1574
ENSG00000128849	CGNL1	5.29563	3.26152	5.9621	4.64596	5.61961	6.63566	5.40141	4.23382	3.51801	4.20376	3.83126	4.85325	3.14271	3.82785	4.49213	4.49629	4.33539	4.00434	4.48039	3.08265	3.85339
ENSG00000145907	G3BP1	5.28745	5.43591	5.29129	5.63639	4.91303	5.29557	5.28596	5.75291	6.02982	5.97465	6.20358	6.20156	6.08541	6.1383	5.7061	5.82206	5.65768	5.51852	5.60768	5.94699	6.32728
ENSG00000126777	KTN1	5.28581	5.95936	5.94767	5.82814	5.21771	5.68072	5.61097	5.111	5.36123	5.59871	5.67137	5.61027	5.64126	5.40645	5.44244	5.40335	5.05008	5.57294	5.27923	5.65164	5.51638
ENSG00000114541	FRMD4B	5.27922	5.15741	4.53625	4.43294	4.42181	4.85576	4.54636	4.49757	4.23902	4.45171	4.28058	4.40223	4.28532	4.10754	4.82204	4.4609	4.2809	4.50862	4.60247	4.20683	4.33951
ENSG00000177954	RPS27	5.27592	5.90219	5.21415	6.06176	5.61961	5.56931	5.58984	4.76195	4.51754	4.67782	4.41671	4.10234	4.60622	4.80843	4.8605	4.48506	4.87273	4.68152	4.62631	4.79366	4.44768
ENSG00000071054	MAP4K4	5.27095	5.14625	5.00704	4.92279	5.23785	4.89422	5.02692	7.5519	7.02542	7.47448	6.46431	7.02815	6.66025	6.56807	7.59382	7.33115	7.24899	7.13399	7.27655	6.79053	6.73128
ENSG00000225733	FGD5-AS1	5.26929	5.54281	5.47071	5.64413	5.52442	5.64565	5.61306	4.47805	4.16009	4.46686	4.61155	4.26861	4.47359	4.35631	4.40231	4.21546	4.43587	4.41345	4.41995	4.48061	4.56956
ENSG00000136205	TNS3	5.26763	4.57405	4.56895	5.00988	4.87989	4.32792	5.08998	3.19728	2.79484	3.3356	2.94611	2.4321	2.97002	2.3652	2.97729	2.68386	2.63775	2.42612	0.650338	3.07839	2.37784
ENSG00000197702	PARVA	5.26763	4.6975	5.50632	5.35092	4.97897	5.23373	5.0718	4.46489	4.33116	4.31932	4.45958	4.68483	4.4009	4.43346	4.60767	4.5818	4.40659	4.45854	4.39377	4.42499	4.36696
ENSG00000198873	GRK5	5.26596	4.35989	5.01101	5.52429	4.86602	5.20015	4.47325	3.33674	3.31331	3.78001	3.40675	3.42703	3.40963	3.15576	3.47047	3.91534	3.62539	3.18312	3.54559	3.06874	3.30521
ENSG00000111339	ART4	5.26096	4.56526	4.33234	4.17394	4.55376	5.64853	4.85872	1.07702	0.563582	-0.192733	2.15923	2.5551	2.68783	2.003	1.5651	1.11112	0.133688	1.33233	2.1451	1.69173	0.547663
ENSG00000204843	DCTN1	5.26096	5.37431	4.92311	5.18767	4.61192	4.84994	4.8166	5.28956	5.0692	5.20984	4.84916	4.88692	4.97018	5.15747	5.34665	5.29779	5.18812	5.20075	5.09402	5.05184	4.86152
ENSG00000167291	TBC1D16	5.25929	5.56106	3.94092	4.50809	4.54135	4.85244	4.99272	5.0594	4.65363	4.53919	4.16571	4.06143	4.41137	4.52854	5.11568	4.99593	4.9284	5.07414	4.67134	4.78878	4.77048
ENSG00000166441	RPL27A	5.25761	6.41245	5.43716	5.67588	5.51174	5.84473	6.05899	5.87831	5.77896	5.72231	5.7833	5.57704	5.7607	5.87182	5.73399	5.82624	5.86936	5.90659	5.81882	5.7731	5.8018
ENSG00000165119	HNRNPK	5.25594	6.18852	5.73483	5.71044	5.66953	5.62244	5.62609	6.06781	6.19789	6.07329	6.21429	6.28997	6.2194	6.15225	6.0201	6.11716	5.78695	6.04386	5.98977	6.27221	6.34882
ENSG00000149930	TAOK2	5.25426	5.17947	4.91041	5.06069	4.3694	5.09517	5.09823	5.04621	4.91702	4.80153	4.87593	4.56206	4.79509	4.88184	5.1004	5.15496	5.05403	4.94514	5.18815	4.9334	4.9133
ENSG00000173402	DAG1	5.25426	4.53225	5.25826	5.57675	5.17011	5.00382	4.92432	4.67204	4.4966	4.92816	5.08285	5.44598	4.94673	4.60557	4.84822	4.79347	4.65494	4.15058	4.6325	4.72436	4.43616
ENSG00000079102	RUNX1T1	5.25258	3.04835	5.18457	4.31334	4.92264	4.84159	4.30585	2.78992	2.18708	2.22824	3.05372	3.7233	2.74413	3.14204	2.84886	2.86588	1.9171	2.04323	2.48489	2.46783	1.31179
ENSG00000171634	BPTF	5.2509	4.43132	5.46782	5.29508	5.52694	5.14557	5.0847	4.05831	4.23787	4.11188	3.95715	4.18687	3.76566	3.90933	4.27649	3.92161	4.32815	4.33383	4.14104	3.94326	3.74922
ENSG00000275832	ARHGAP23	5.2509	3.84176	5.24145	5.29404	4.44333	5.04586	5.18813	4.67147	4.71673	4.84052	4.96527	5.41383	4.95935	4.79582	4.37068	4.61631	4.49399	3.89601	4.44873	4.74099	4.00022
ENSG00000179314	WSCD1	5.24922	5.1835	4.62962	5.22183	4.70836	5.21897	4.9386	4.1598	3.95346	4.18204	4.15501	4.42957	4.27389	3.67738	4.50028	4.46305	4.28165	4.37622	4.31755	4.03308	3.43222
ENSG00000129003	VPS13C	5.24584	4.99925	5.6029	5.21418	5.5958	5.68959	5.62142	4.28937	4.42686	4.72316	4.41798	4.34057	4.35309	4.06614	4.79362	4.54915	4.74037	5.03535	5.30174	4.40256	4.67685
ENSG00000113758	DBN1	5.24246	5.6072	4.66534	5.071	4.48541	5.04076	4.98303	6.64874	6.36346	6.42831	5.83665	5.74692	6.0893	6.12208	6.66463	6.40772	6.27818	6.408	6.2689	6.32662	6.03952
ENSG00000188643	S100A16	5.24077	4.8915	4.39447	4.41685	4.02873	4.90067	4.7704	6.545	5.96753	6.25156	6.05094	6.44911	6.13634	5.8739	6.57663	6.31027	6.25449	6.4193	6.41283	6.32966	6.01277
ENSG00000162512	SDC3	5.23738	3.49984	4.539	4.77995	4.315	4.30137	4.34673	3.40861	3.19064	3.10631	3.55598	3.9455	3.05386	3.18729	3.82529	3.40353	2.33069	2.8487	2.64346	3.17446	2.41776
ENSG00000150907	FOXO1	5.23568	4.22346	5.93831	5.22997	5.3259	5.67603	5.68257	3.97906	3.84917	4.35044	3.82163	3.97362	3.52797	3.06169	4.19456	4.34145	4.19032	4.24384	4.53179	3.79837	3.70151
ENSG00000172380	GNG12	5.23057	5.1344	6.26617	5.32783	5.31281	5.79715	6.02121	5.37752	5.97719	5.59129	6.39697	6.3938	6.29066	5.89338	5.40013	5.51177	5.11171	5.37839	5.45278	5.73702	6.06996
ENSG00000161203	AP2M1	5.22715	5.51065	4.82501	5.06616	5.50153	5.02904	5.20907	6.11385	5.7825	5.80647	5.83665	5.886	5.97094	5.98315	5.98785	5.92304	5.82579	5.62807	5.74273	5.96819	5.72243
ENSG00000177283	FZD8	5.22715	3.59624	4.98095	4.22916	5.11421	5.07608	4.73619	2.37171	2.59437	2.46018	1.45553	1.35935	1.66718	2.11965	3.0202	2.94587	2.22856	2.19567	2.37659	2.31301	2.65574
ENSG00000099331	MYO9B	5.22544	4.68213	4.38532	4.82007	4.71943	4.03894	4.27706	4.79597	4.39016	4.48985	4.36259	4.40568	4.38985	4.76481	4.80724	4.68723	4.98754	4.65115	4.39195	4.67646	4.49909
ENSG00000150347	ARID5B	5.22544	5.03599	5.912	5.5566	4.79876	5.74929	5.48675	0.616295	0.472911	1.70682	2.52248	2.34865	1.91712	0.806254	0.591761	0.502223	0.938191	0.874396	1.08431	0.742503	0.448372
ENSG00000170275	CRTAP	5.22373	4.99859	5.31558	5.61499	5.31281	5.63313	5.53949	4.75547	4.64587	5.04339	4.77322	4.77283	4.95152	4.57865	4.92965	4.83054	5.19928	4.86843	4.98275	4.81626	4.61401
ENSG00000131051	RBM39	5.22201	6.15022	6.37727	5.58651	5.53698	5.70762	5.61149	5.0027	5.03792	4.93739	5.08889	4.87454	5.17306	5.1042	5.0499	4.96292	5.0823	5.49145	5.47534	5.10655	5.28826
ENSG00000131724	IL13RA1	5.22201	5.57821	6.16554	5.7423	5.6137	5.3683	6.00494	3.89128	3.7878	3.87215	4.33982	4.1667	4.25961	4.51677	3.93186	3.67956	3.51105	4.03406	4.00096	4.00469	4.09882
ENSG00000108582	CPD	5.22029	5.81882	5.92995	5.61995	6.11881	5.78021	6.06359	4.46423	4.52226	4.58636	4.81363	4.70594	4.83969	4.5209	4.99756	4.88015	4.78232	5.30836	5.28808	4.95101	4.99033
ENSG00000011105	TSPAN9	5.21685	5.09523	5.3442	5.35787	5.1259	5.27339	5.54992	3.23963	2.67455	3.18733	3.46237	3.10975	3.02429	3.02061	3.57695	3.95455	2.8428	2.92207	3.37981	3.35462	3.1581
ENSG00000092148	HECTD1	5.21513	5.80805	5.48791	5.56478	5.50281	5.68539	5.70288	5.17947	5.36281	5.40574	5.40562	5.38357	5.5001	5.37126	5.39344	5.27922	5.48213	5.63293	5.52422	5.58741	5.61288
ENSG00000135506	OS9	5.20995	6.10876	5.35517	5.76303	5.19886	5.39936	5.48102	4.71547	4.33116	4.4364	4.16267	3.70384	4.19933	4.26639	5.00902	4.84379	4.75827	4.72089	5.01746	4.44543	4.44906
ENSG00000102144	PGK1	5.20821	6.31719	5.60158	5.83492	5.29221	5.18571	5.40201	6.38915	6.44001	6.52179	6.2119	6.25219	6.42034	6.33259	6.14808	6.25329	6.3277	6.12414	6.06949	6.37276	6.38392
ENSG00000135387	CAPRIN1	5.20648	4.8908	5.19158	5.22835	5.16527	5.09377	5.15974	6.06454	6.02351	6.06375	5.97062	6.39683	5.97448	6.09007	5.99247	5.87679	5.87111	5.75732	5.66956	5.87625	5.77497
ENSG00000165029	ABCA1	5.20648	5.16266	4.67788	4.54599	5.00993	4.21219	4.84541	1.66083	1.13629	0.902892	1.63786	0.408258	0.624971	0.506396	3.05893	2.20822	1.82129	3.35312	3.01908	-0.0587969	1.0564
ENSG00000187109	NAP1L1	5.20648	5.40224	5.57097	5.27212	5.52694	5.69284	5.69647	5.25595	5.56929	5.42675	5.76759	5.87237	5.82103	5.50148	5.36994	5.46466	5.40883	5.9823	5.72727	5.6529	5.93549
ENSG00000071082	RPL31	5.20474	6.88824	5.34105	5.62367	5.73967	6.01482	6.27789	5.29292	5.19094	5.0309	5.32779	4.96839	5.33683	5.11439	5.11638	5.47108	5.49965	5.44684	5.53809	5.49519	5.5854
ENSG00000100320	RBFOX2	5.20126	5.38135	4.73902	5.2716	5.15226	5.38219	5.39289	5.1726	4.76689	5.36092	4.88983	5.09329	4.8894	4.81373	5.43481	5.24301	5.20681	5.24876	5.34878	5.21305	5.33691
ENSG00000145623	OSMR	5.19952	4.65917	5.06931	4.90255	4.57097	4.62122	4.26911	1.4419	1.82111	2.88652	2.76092	3.77216	1.98545	1.68739	1.59379	2.10196	1.18912	1.22302	1.72609	0.552552	0.317826
ENSG00000050405	LIMA1	5.19428	4.9782	5.60946	5.79668	4.87594	5.51521	5.52676	4.50466	4.82303	5.35561	5.66006	5.74692	5.56472	5.27951	4.71278	4.34223	4.62391	4.53225	4.40104	4.93546	4.85391
ENSG00000099622	CIRBP	5.19428	5.16732	4.78382	5.00735	4.94732	5.22412	5.46776	3.98368	3.55716	3.81229	3.97552	3.01819	3.78956	4.06453	4.30403	4.40911	4.25363	4.42808	4.3084	4.3544	4.51144
ENSG00000134250	NOTCH2	5.19428	5.35556	4.38226	4.94077	5.38407	4.74639	4.95191	4.88265	5.02468	5.30529	4.70621	4.82007	4.77322	4.73057	4.72302	4.53356	5.41362	5.0866	4.55642	4.89115	4.60827
ENSG00000159658	EFCAB14	5.19428	4.68294	5.3738	5.46756	5.1209	5.08601	5.17684	4.62312	4.4695	4.66979	4.39738	4.55587	4.2295	4.23081	4.8033	4.78605	4.66475	4.27778	5.07483	4.21463	4.45957
ENSG00000179094	PER1	5.19253	5.34943	6.87571	5.76115	5.34317	5.26404	5.88649	1.98599	1.85142	1.81275	1.97334	2.44556	2.36775	2.28975	1.72926	1.9428	2.22232	1.78107	1.86136	1.69452	1.15866
ENSG00000177200	CHD9	5.19078	4.69186	5.76218	5.38097	5.15226	5.39366	5.54828	3.64517	3.79873	3.93885	3.96942	4.03942	3.74768	3.77052	3.88951	3.69548	3.64302	3.92881	3.92546	3.62711	3.92571
ENSG00000181789	COPG1	5.19078	5.07864	4.93152	5.39698	4.65173	4.76417	4.89706	5.58486	5.50592	5.45974	5.19493	5.23172	5.37324	5.511	5.4742	5.305	5.77608	5.53991	5.49861	5.36747	5.21733
ENSG00000114019	AMOTL2	5.18902	5.46835	5.40733	5.90916	5.4157	5.511	5.76922	4.61956	4.46264	4.59275	4.6149	4.36201	4.77283	4.76879	4.88599	4.58641	4.83592	5.00039	4.89762	4.88719	4.82062
ENSG00000138688	KIAA1109	5.18727	4.82675	5.43124	5.24987	5.61251	5.33537	5.37633	4.02731	4.13197	4.28555	3.89696	3.71777	3.77573	3.77646	4.18584	3.95557	4.31795	4.85725	4.74532	4.01086	4.00398
ENSG00000065150	IPO5	5.18022	5.06623	4.59299	5.02369	5.36165	5.4639	5.47123	5.74558	5.77185	5.98359	5.97931	6.25506	6.25512	6.00564	5.41456	5.33345	5.55964	5.58955	5.42876	5.97179	5.93204
ENSG00000100403	ZC3H7B	5.18022	4.48733	4.71244	4.94539	4.92072	5.17045	5.15327	5.22546	5.17125	4.95897	5.45444	5.24332	5.53471	5.57795	5.30512	5.04072	5.26752	5.18527	5.07738	5.43243	5.22002
ENSG00000136848	DAB2IP	5.18022	4.49383	4.90828	5.62655	4.29739	4.77561	4.71975	4.11753	3.71219	3.80589	3.83797	3.98288	3.69152	3.75858	4.28656	4.1574	3.94626	4.1044	3.99496	3.83614	3.69069
ENSG00000131504	DIAPH1	5.17845	4.11796	4.73902	5.1174	4.50345	4.49058	4.39746	4.71714	4.6985	4.88847	4.6957	5.39055	4.33277	4.45397	4.65463	4.74015	4.46918	4.037	4.10755	4.32499	3.72443
ENSG00000111961	SASH1	5.17491	4.95415	5.12351	5.34842	4.88579	4.72384	5.31779	5.20344	4.96355	5.75566	5.01768	5.17228	4.7088	4.96561	5.68816	5.55436	5.79932	5.80184	5.40839	5.33072	5.37531
ENSG00000198792	TMEM184B	5.17491	3.91834	4.56084	5.23915	4.26755	4.42278	4.50068	4.65823	4.56678	4.7183	4.57646	4.64165	4.54233	4.57922	4.6434	4.59557	4.67848	4.30486	4.34749	4.54155	4.37809
ENSG00000137331	IER3	5.17313	6.40507	6.33749	6.90281	5.23939	5.91686	6.05244	4.0102	2.95973	3.40014	2.38794	3.29207	2.891	2.9383	4.57824	4.47516	4.80911	4.0675	4.76869	3.0405	3.5178
ENSG00000065308	TRAM2	5.17135	4.67069	5.33947	5.78125	5.48477	5.87164	5.75221	4.75763	4.84277	5.15298	5.24876	5.70978	5.08269	5.25598	4.86555	5.18824	5.12723	4.60139	4.99541	5.44553	5.39925
ENSG00000129116	PALLD	5.17135	5.12845	4.17486	4.65969	5.18136	4.50546	5.61933	2.80462	3.03561	2.83896	2.92647	2.9348	2.23709	2.73794	2.57849	2.3908	2.20344	2.45057	1.84279	2.25181	2.26982
ENSG00000152217	SETBP1	5.17135	4.074	4.40658	4.56242	4.54881	4.64157	4.08205	1.60434	0.947154	0.896022	1.55656	1.84883	0.631809	0.751062	2.50271	2.31355	1.49884	2.44172	3.07923	0.275298	0.426176
ENSG00000069275	NUCKS1	5.16958	5.17774	6.1806	5.71586	5.54695	5.98062	6.1029	5.73081	6.00307	6.12764	6.31059	6.30803	6.15974	6.04796	5.7755	5.92745	5.81054	6.01732	5.91336	6.11588	6.59501
ENSG00000090924	PLEKHG2	5.16958	3.77009	4.53625	3.96472	4.50601	3.40305	3.75387	3.80618	3.64803	3.47004	2.88452	3.29578	3.08658	3.57894	4.01755	3.85665	3.98085	3.91849	3.76076	3.36254	2.94177
ENSG00000152583	SPARCL1	5.16601	7.08611	4.48577	5.15211	2.77032	3.53942	4.31746	-6.04192	-3.88855	-3.17093	1.70647	-0.633562	-5.28535	-4.03634	-5.55799	-2.87073	-4.45794	-3.65575	-4.1479	-8.32089	-4.71058
ENSG00000160111	CPAMD8	5.16601	3.862	4.13538	3.77291	3.62962	4.22509	2.90435	-1.21749	-0.317003	-0.781362	-0.270675	-0.814134	-1.49279	-0.891288	-0.9374	-0.694406	-1.05801	-0.826865	-1.44094	-1.18134	-1.03046
ENSG00000186111	PIP5K1C	5.16601	4.02481	5.23298	5.58143	4.52631	4.55125	4.72558	3.37804	3.42635	3.41463	3.40546	3.70104	2.93589	3.28628	3.63431	3.6906	3.41037	3.26812	3.04947	3.02285	2.96377
ENSG00000197157	SND1	5.16423	5.71609	4.92311	5.17478	5.0543	4.93562	5.34326	5.96359	5.95886	5.77919	5.57173	5.38357	5.79955	5.77855	5.90952	5.88856	6.19779	6.10501	5.83903	5.91145	5.76358
ENSG00000265107	GJA5	5.16244	3.72816	4.77216	3.85805	5.66839	6.05366	4.86488	2.66199	0.290258	-3.90789	-0.623854	1.24091	0.898817	1.63609	3.33623	1.8096	0.185918	2.92366	2.86333	0.267823	-0.857131
ENSG00000089154	GCN1	5.16065	4.88233	4.36063	4.67409	4.47239	4.54303	4.65104	5.70362	5.77857	5.70227	5.41559	5.40783	5.54562	5.56629	5.58323	5.32403	5.89729	5.68468	5.24556	5.5117	5.29134
ENSG00000100813	ACIN1	5.16065	4.65254	5.13992	4.49913	4.84798	4.72566	4.46747	5.17098	5.00459	4.77041	4.80974	5.01763	4.83563	5.11399	4.93927	5.00873	4.9284	4.69553	4.79341	4.91915	4.62379
ENSG00000140406	TLNRD1	5.16065	4.68375	5.03266	5.51054	4.09819	5.29373	5.18461	3.27625	3.61484	3.78931	3.79627	3.16772	3.37235	3.59134	3.30186	3.78061	3.62539	3.36603	3.35663	3.55063	3.55322
ENSG00000105401	CDC37	5.15886	5.70733	5.22103	5.14063	4.54633	4.68049	4.76287	5.56495	5.50877	5.2745	5.23576	5.1478	5.47156	5.58416	5.36608	5.39437	5.29044	5.15988	5.20434	5.43431	5.24955
ENSG00000204256	BRD2	5.15886	4.10831	4.89545	4.94341	4.71058	4.73019	4.42038	4.99174	4.96909	4.99599	4.81848	5.11239	4.79775	5.0011	4.92684	4.68968	4.88907	4.62648	4.88115	4.75241	4.57965
ENSG00000238741	SCARNA7	5.15526	5.79645	5.44011	5.11212	4.70391	5.32282	5.09972	3.56726	3.49131	3.35702	3.5664	3.29578	3.2621	3.74653	3.93186	4.23738	4.02364	4.20256	4.29821	3.8374	4.09648
ENSG00000103657	HERC1	5.15347	5.36015	5.27817	5.31359	6.06605	5.20407	5.6426	4.5731	4.77086	4.53311	4.43198	4.05924	4.25906	4.40565	4.71977	4.44867	5.17848	5.4285	5.21392	4.62034	4.44401
ENSG00000167552	TUBA1A	5.15347	6.18766	5.16865	5.36183	4.98631	5.00606	5.18179	6.47846	6.45809	6.57934	5.81108	5.29532	5.76906	6.61919	6.63375	6.36299	6.13835	6.00274	5.85946	6.23843	6.46224
ENSG00000196576	PLXNB2	5.15166	4.29116	4.59828	4.31027	4.53134	4.33507	4.29022	5.04311	4.34614	4.14195	4.08103	4.17278	3.87488	4.2692	4.79494	4.8531	4.45262	4.25588	4.2472	3.83424	3.69919
ENSG00000055609	KMT2C	5.14444	4.67069	5.21759	5.07643	5.61013	4.89503	5.03398	4.03445	4.23443	4.24422	4.03425	4.24187	3.79946	4.01016	4.23415	3.96973	4.38301	4.21494	4.20784	4.03143	3.77213
ENSG00000061676	NCKAP1	5.14444	4.79023	5.54655	5.27894	5.06301	5.35016	5.31264	4.88611	5.16402	5.36341	5.51278	5.79959	5.30697	5.0752	5.05985	5.28247	4.99716	5.21185	5.2817	5.23286	5.49965
ENSG00000089009	RPL6	5.14444	6.00202	4.95026	5.38584	5.35173	5.57789	5.53618	5.8636	5.7194	5.64452	5.53977	5.39575	5.73751	5.6503	5.59569	5.80664	5.86236	5.76598	5.72943	5.89107	5.68845
ENSG00000182670	TTC3	5.14263	4.99794	4.99104	5.07884	5.42384	5.5894	5.66702	4.82768	4.53445	4.60175	4.64471	4.39185	4.64644	4.46565	5.22058	4.89135	4.85217	5.51852	5.29053	4.90718	5.11061
ENSG00000047617	ANO2	5.14081	5.30891	4.45695	4.87304	5.11923	5.33715	5.49643	1.1512	1.30347	1.33242	1.65532	1.16162	0.434772	1.47024	1.63776	0.95709	2.13202	2.14208	1.73187	1.04761	1.68017
ENSG00000073910	FRY	5.14081	4.87807	5.17928	6.1231	5.32879	4.91666	5.28858	3.58926	3.31982	4.13832	3.35426	3.76682	3.67258	3.04867	3.40722	3.51125	3.86849	3.64851	4.11254	3.57279	3.35208
ENSG00000089351	GRAMD1A	5.13535	4.48267	4.62703	4.74855	4.16769	4.66637	4.19409	4.00566	3.53865	3.9849	3.17823	3.6084	3.10144	3.40852	4.29968	4.15651	4.2544	3.92881	4.05668	3.39636	3.39652
ENSG00000135677	GNS	5.13535	6.15198	5.59894	5.57718	5.52315	5.60823	5.72582	5.71922	5.38732	5.67218	5.22922	5.18637	5.27512	5.28507	6.10797	5.8576	5.92084	6.06237	6.118	5.53621	5.75508
ENSG00000104331	IMPAD1	5.1317	5.28501	5.97943	5.27685	5.70336	5.94753	6.35567	4.42331	4.64759	4.38826	4.75004	4.76212	4.78055	4.61775	4.5207	4.52124	4.23671	4.3981	4.61932	4.67893	5.20516
ENSG00000171988	JMJD1C	5.12987	5.15916	6.31598	4.89915	5.55191	5.27339	5.34956	4.52255	4.68678	5.06652	4.52752	4.70174	4.43746	4.32426	4.85881	4.60727	4.56782	4.75743	5.15817	4.73659	4.78763
ENSG00000116539	ASH1L	5.12804	4.60184	5.13265	5.01931	5.21614	5.02978	4.81569	3.42501	3.57906	3.60781	3.50993	3.66412	3.46715	3.55036	3.69893	3.37644	3.8433	3.89601	3.7551	3.63439	3.19028
ENSG00000196730	DAPK1	5.12804	4.71351	5.36607	5.43833	4.60954	5.39993	5.09298	4.74843	4.72902	4.6279	4.94678	4.76212	4.62218	4.569	4.78164	4.73126	4.58068	4.65641	5.02306	4.38927	4.32359
ENSG00000156675	RAB11FIP1	5.12621	5.15213	5.57902	5.58609	5.64072	5.40163	5.98687	0.786749	1.06565	2.65791	2.71587	2.45888	2.07346	1.31035	-0.622526	-1.73323	-0.279135	-0.502801	-0.584306	0.355065	-0.245201
ENSG00000166025	AMOTL1	5.12621	4.50399	4.57969	4.857	4.4353	4.9659	4.67331	4.50979	4.54191	4.42392	4.68565	5.01988	4.601	4.60835	4.69586	4.87101	4.5635	4.62794	4.55438	4.84762	4.78654
ENSG00000139112	GABARAPL1	5.12437	6.43072	6.62217	5.90577	5.44533	5.48496	5.88085	3.16021	2.64716	2.87259	2.64771	2.09062	3.0073	2.36257	3.07646	2.80396	2.90254	3.16577	2.91248	2.89282	2.69649
ENSG00000140943	MBTPS1	5.12254	5.14152	4.88033	5.18822	4.86203	4.98423	5.04721	4.82098	4.54005	5.06461	4.7657	4.91982	4.91835	4.82045	4.9802	4.94151	5.03636	4.92703	4.99301	4.90024	4.89826
ENSG00000174238	PITPNA	5.12254	4.11555	5.01101	4.87026	4.84192	4.95897	4.83287	4.33131	3.88037	4.1528	3.97812	4.31515	3.76489	3.97446	4.3564	4.23654	4.0617	3.94924	3.64078	3.82536	3.61339
ENSG00000197077	KIAA1671	5.12254	3.95516	5.39219	5.11506	5.01353	5.58391	5.13151	4.3579	4.10203	4.069	3.58132	3.87516	3.68085	3.73032	4.6556	4.65815	4.41277	4.1431	4.464	3.91901	3.86169
ENSG00000131016	AKAP12	5.1207	6.3043	6.88602	6.78392	4.38893	4.90548	6.7111	7.29538	7.43895	7.48903	6.78101	6.51917	6.21115	8.28877	7.12663	6.70405	7.2889	7.22798	6.56428	6.95002	7.6703
ENSG00000155090	KLF10	5.1207	5.59904	6.81112	6.10107	5.82512	6.223	6.5011	3.11543	3.24188	3.28391	3.41061	3.66412	3.67424	3.80867	3.46494	3.13017	3.24942	3.03075	2.58242	3.39292	3.1536
ENSG00000117713	ARID1A	5.11885	3.78683	4.60618	4.27501	5.05953	4.4239	4.2876	4.30349	4.31928	4.09473	3.92782	4.53243	3.87127	4.19654	4.03185	3.97074	4.28615	3.88952	3.99916	4.00357	3.55748
ENSG00000124766	SOX4	5.11885	5.23764	4.11338	3.94374	4.40547	4.85576	4.64286	5.357	5.11177	4.56649	4.43388	4.11713	4.5733	5.13724	5.46591	5.68585	5.18932	5.66368	5.21315	5.21012	5.76543
ENSG00000162434	JAK1	5.11885	5.16441	4.65522	4.9401	5.01892	4.57864	4.64081	5.83166	5.61815	5.67794	5.19865	5.40611	5.14674	5.68857	5.99957	5.81563	6.10886	6.05315	5.99113	5.69182	6.00015
ENSG00000182944	EWSR1	5.11701	4.91938	5.09386	4.95525	4.49317	4.63578	4.58424	5.22311	5.24388	5.38872	5.29996	5.26813	5.40452	5.39781	5.40245	5.43506	5.51695	5.51667	5.43563	5.64372	5.74409
ENSG00000102935	ZNF423	5.11516	3.83299	4.61404	4.65324	4.68372	4.68796	4.3877	0.690533	0.889897	1.63849	1.93454	2.33426	1.83655	1.35862	0.575413	-0.276181	0.0231883	0.800223	0.806301	0.134435	-0.109318
ENSG00000196531	NACA	5.11331	6.50503	5.50772	5.65466	5.60059	5.93738	6.02121	5.64269	5.52202	5.5327	5.58346	5.40439	5.68814	5.53133	5.54962	5.64134	5.74105	5.6385	5.63182	5.77689	5.66673
ENSG00000100034	PPM1F	5.11146	5.01741	3.97791	4.61229	4.7128	4.8441	4.76475	5.83294	5.67349	5.88598	5.25378	5.20922	5.28816	5.20298	5.78198	5.95238	6.02397	5.74074	5.79935	5.81858	5.73791
ENSG00000117868	ESYT2	5.10961	5.38235	5.27322	6.04616	4.68146	5.5804	5.4608	4.25002	4.16372	4.61436	4.39932	4.46468	4.47549	4.35433	4.45854	4.28914	4.45462	4.20974	4.49192	4.33844	4.39342
ENSG00000124486	USP9X	5.10961	5.1858	5.49927	5.2987	5.96741	5.51521	5.53231	4.92843	5.18679	5.1454	5.19418	5.17934	5.19659	5.04068	5.15746	5.01362	5.10833	5.40252	5.26337	5.2884	5.23047
ENSG00000107819	SFXN3	5.10775	3.90725	4.84517	4.78806	4.21849	4.4306	4.23413	4.07226	3.54423	4.27235	3.79627	3.80123	3.42939	3.76357	4.23285	4.2996	4.15636	3.92326	4.05955	3.9196	3.77799
ENSG00000108219	TSPAN14	5.10589	4.71032	5.19158	5.40803	4.92072	5.18108	4.95687	5.72696	5.48142	5.46352	5.25091	5.56784	5.46176	5.33015	5.5457	5.36212	5.41054	4.89904	4.93723	5.53835	5.04476
ENSG00000168066	SF1	5.10403	4.22122	5.2831	4.88065	4.86999	4.59563	4.34673	5.03646	4.87559	4.84231	4.8073	5.35445	4.71042	4.92433	4.83154	4.83773	4.8772	4.38201	4.32712	4.74368	4.35771
ENSG00000197183	NOL4L	5.10216	4.33009	5.03461	4.79027	4.89753	4.8441	4.71	5.31802	5.18083	4.79831	4.60426	4.85829	4.87974	5.17592	5.22681	5.0311	5.22447	5.21055	4.45486	5.25595	5.0116
ENSG00000152518	ZFP36L2	5.1003	3.68497	5.02482	5.35688	4.98631	4.54406	4.50294	3.07269	2.65749	2.69796	2.82018	3.15958	2.11064	2.21305	3.3031	3.74575	3.00967	3.4143	3.60974	2.29841	1.9372
ENSG00000105220	GPI	5.09843	4.87665	4.54723	5.04107	4.54384	4.52749	4.57996	5.96569	5.85161	6.12231	5.84738	6.12054	5.76848	5.59148	5.75977	5.89228	6.05918	5.51351	5.56038	5.67832	5.31493
ENSG00000105568	PPP2R1A	5.09843	5.10011	4.25408	5.05398	4.315	4.5986	4.76852	5.73493	5.41701	5.58916	5.32745	5.36776	5.49613	5.41978	5.66106	5.72158	5.68544	5.60992	5.58731	5.61252	5.49898
ENSG00000132589	FLOT2	5.09843	5.31365	5.7167	5.53879	5.59099	5.46008	5.31393	4.47739	4.30949	4.82749	4.76067	4.64894	4.47454	4.10989	4.80724	4.67555	4.68247	4.50385	4.94159	4.40256	4.09765
ENSG00000170876	TMEM43	5.09281	5.27047	4.94819	5.45233	4.56607	4.90388	5.01825	4.45826	4.4646	4.62738	4.8981	4.75538	4.66781	4.4082	4.51374	4.21631	4.23748	4.15465	4.2233	4.4153	4.33654
ENSG00000198844	ARHGEF15	5.09281	4.32593	4.74619	5.04908	4.19965	4.53787	4.15866	4.38609	4.26402	4.50291	3.89696	3.99437	3.41162	3.76357	4.5555	4.37834	4.25745	4.08961	4.30356	3.95959	3.87677
ENSG00000221978	CCNL2	5.09093	4.30072	5.18281	4.67647	4.16769	4.59165	4.22868	4.45361	4.09191	4.3673	4.18463	3.97594	4.1207	4.28663	4.73088	4.76648	4.8039	4.81592	4.89698	4.39228	4.47902
ENSG00000244038	DDOST	5.09093	6.18967	5.18457	5.39166	5.11421	5.19623	5.4538	5.80553	5.59952	5.63449	5.44976	5.35624	5.77138	5.50028	5.83208	5.76894	5.92709	5.74029	5.79884	5.80088	5.65882
ENSG00000144802	NFKBIZ	5.08905	5.47165	4.95645	5.39505	5.65	5.56881	4.38892	1.57524	1.9722	2.65994	2.02798	1.45556	1.28884	1.91248	1.38921	1.95506	2.9951	1.94651	2.20447	1.95174	2.0956
ENSG00000187955	COL14A1	5.08905	5.42429	3.24904	3.57228	5.33312	5.07679	5.06723	-5.30495	-7.05847	-7.81478	-2.43648	-1.78243	-3.84478	-4.03634	-4.70999	-7.51459	-6.0429	-5.09633	-4.53492	-6.73593	-6.58505
ENSG00000008513	ST3GAL1	5.08528	4.99859	4.74619	4.90933	5.0734	5.25212	5.06723	4.33927	4.24131	4.22653	4.29457	4.30964	4.4939	4.45644	4.32557	4.23319	3.85343	3.75765	4.1356	4.76475	4.19549
ENSG00000057608	GDI2	5.08528	6.22248	5.13811	5.46756	5.20674	5.64421	5.55592	5.86309	6.06936	5.92679	6.12507	6.11529	6.06029	5.96702	5.73307	5.78848	5.66776	5.84755	6.02549	6.04358	6.16531
ENSG00000132688	NES	5.08528	3.82859	3.7545	2.77365	3.63897	5.03198	3.70558	6.85926	7.05079	6.45996	6.5136	6.42512	6.67087	6.5195	6.71529	6.87431	6.65269	6.623	6.30773	6.89141	6.83276
ENSG00000182197	EXT1	5.08528	4.3821	4.81141	5.24505	4.57097	4.71564	4.87802	3.96511	3.73513	4.19329	4.47748	4.61362	4.59226	4.61167	4.44848	4.34534	4.35263	4.34632	3.79427	4.49549	4.15163
ENSG00000100354	TNRC6B	5.08339	4.18379	4.86943	4.85068	5.54322	4.94032	4.99192	4.00475	3.8789	4.01613	3.81969	3.95022	3.62111	3.59021	4.04081	3.92888	4.0299	3.9367	3.96278	3.68929	3.59527
ENSG00000065534	MYLK	5.0815	5.93055	4.1784	4.22156	5.11253	4.91825	5.22217	1.37594	1.55992	2.08457	1.10784	0.514192	0.224707	0.598612	1.01187	1.52159	1.87397	1.9117	1.42107	1.00329	1.70804
ENSG00000075785	RAB7A	5.07961	3.1901	4.84071	4.38414	4.74996	4.11436	4.0986	4.85517	4.35357	4.57565	4.37779	5.27568	4.15789	4.54022	4.40693	4.54036	4.09878	3.08003	3.04831	3.92496	2.98417
ENSG00000130202	NECTIN2	5.07961	5.35403	5.04239	5.42515	4.43261	4.89986	5.2297	4.95126	5.0093	4.85432	4.90222	4.8058	5.12237	4.92789	5.2476	5.25587	4.95075	4.90589	4.84263	5.0191	4.66899
ENSG00000166398	KIAA0355	5.07771	5.49128	5.48649	5.70733	5.11085	5.39765	5.41589	3.93775	3.90515	4.20932	3.93409	3.83994	4.0414	4.21487	4.2361	4.00554	4.28465	4.28522	4.16845	3.84684	3.92175
ENSG00000173848	NET1	5.07581	4.93721	6.13311	5.86591	4.79039	5.67321	5.33185	2.78781	3.16915	3.27467	3.65043	3.55044	3.24659	3.23835	2.72464	2.80396	2.93342	2.88992	2.77517	3.1059	3.05218
ENSG00000266412	NCOA4	5.07581	5.90742	5.32039	5.59831	9.45077	5.61069	6.11958	5.51123	5.59773	5.64785	5.71079	5.83516	5.67455	5.47313	5.43112	5.45462	5.33051	5.52035	5.82492	5.46548	5.52663
ENSG00000138760	SCARB2	5.07201	5.38884	5.5035	5.49395	5.21458	5.68119	5.75506	5.01314	4.73391	5.38627	5.06989	5.13228	5.24199	4.86058	5.44609	5.31652	5.09473	5.47935	5.84137	5.18777	5.46446
ENSG00000177600	RPLP2	5.07201	5.72757	5.16509	5.46342	5.27881	5.56374	5.90457	5.77066	5.61903	5.43507	5.52589	5.24908	5.66791	5.52429	5.47365	5.74736	5.729	5.56787	5.54815	5.80509	5.72262
ENSG00000182095	TNRC18	5.06437	4.19523	4.71731	4.33364	4.91111	4.71015	4.86224	3.67519	3.56815	3.23166	3.4323	3.46385	3.20593	3.56071	3.71488	4.11158	3.72694	3.48595	3.46378	3.43191	2.82646
ENSG00000110841	PPFIBP1	5.06054	4.89712	4.86066	4.53463	4.42181	4.57764	4.49841	4.87371	4.88661	5.02894	4.77572	4.92343	4.61271	4.69132	4.83498	4.76995	4.94744	4.79828	4.91264	4.73049	4.82239
ENSG00000163468	CCT3	5.06054	5.95398	4.59564	5.38	4.68823	5.06536	5.08243	6.63058	6.59695	6.48878	6.52047	6.48904	6.84002	6.64983	6.44659	6.33746	6.46729	6.14965	6.06992	6.62579	6.50919
ENSG00000005339	CREBBP	5.05862	3.72658	4.81141	4.67409	5.13914	4.25809	4.24498	3.80931	3.58989	3.63282	3.46856	4.05266	3.33827	3.66996	3.77874	3.63833	3.87944	3.4109	3.40985	3.41593	2.85582
ENSG00000010322	NISCH	5.05862	4.19409	4.65014	4.65889	4.47239	4.75264	4.36425	4.84759	4.48311	4.10147	3.86917	3.58428	3.86693	4.14242	5.08785	4.77515	4.97507	5.01649	4.95832	4.25583	4.21126
ENSG00000011405	PIK3C2A	5.05477	5.04614	5.67225	5.12324	5.15878	5.38391	5.40019	4.3529	4.86077	5.08476	5.40917	5.59978	5.20235	5.14606	4.35819	4.30998	4.28988	4.47597	5.08474	4.66762	5.12848
ENSG00000065978	YBX1	5.05284	5.28286	4.96875	5.36035	5.44932	4.66637	4.92601	6.03167	5.893	6.1918	5.65437	5.7264	5.9116	5.90109	5.82777	5.59181	5.92132	5.58303	5.48884	5.67955	5.32021
ENSG00000136802	LRRC8A	5.05284	5.25961	4.48577	5.04785	4.21849	4.58366	4.91076	5.76235	5.47072	5.71037	5.22337	5.5344	5.36967	5.74237	5.76901	5.4643	5.39676	5.44269	5.42274	5.67426	5.44688
ENSG00000205339	IPO7	5.05284	4.6975	5.25324	4.90391	4.93977	5.14013	5.01508	5.1895	5.45452	5.37489	5.70765	5.96109	5.50988	5.55626	5.13602	5.13355	4.85922	5.18428	4.83359	5.28192	5.32447
ENSG00000106609	TMEM248	5.05091	4.62403	5.23128	5.44861	5.00813	5.01797	5.11311	4.5352	4.31058	4.41193	4.61824	4.62697	4.53733	4.43346	4.46688	4.18455	4.38022	4.32784	4.3828	4.50427	4.43245
ENSG00000120889	TNFRSF10B	5.05091	5.52614	5.58702	5.44161	3.69385	4.75531	5.18602	6.194	5.79347	5.78012	5.44913	5.37569	5.6195	5.2875	6.294	6.24041	6.0134	6.11478	6.27312	5.79456	5.82407
ENSG00000131469	RPL27	5.04897	5.17312	4.78382	4.82223	4.90336	4.7721	5.04876	5.7404	5.31575	5.39786	5.0921	5.10075	5.14406	5.36733	5.45617	5.22245	5.42759	5.21185	4.98366	5.32285	5.10626
ENSG00000163788	SNRK	5.04897	5.45079	6.354	5.47763	5.31281	5.83003	5.80862	5.08887	5.23068	5.31079	4.6037	4.90286	4.6333	4.71005	5.32817	5.3579	5.41704	5.62074	5.49309	5.24099	5.48429
ENSG00000198355	PIM3	5.04704	6.05481	5.13083	5.25413	4.92455	5.11955	5.96489	5.55163	5.43913	5.33353	4.49698	3.81943	4.77245	4.68765	5.17723	5.47676	5.50993	5.63293	5.46454	5.47058	5.55503
ENSG00000137409	MTCH1	5.0451	5.49128	4.96466	5.09082	4.75642	5.17578	5.22628	5.35558	5.27329	5.19382	5.322	4.92823	5.5008	5.35845	5.32969	5.52622	5.28222	5.22994	5.35113	5.71502	5.56268
ENSG00000151702	FLI1	5.04315	5.05935	5.49218	5.47945	5.39929	5.46878	5.2701	4.74626	4.62672	4.91547	4.74801	4.83164	4.60274	4.3377	4.92724	4.72889	4.87124	4.84304	5.23543	4.44874	4.25546
ENSG00000196305	IARS	5.04315	4.52591	4.48862	4.98763	4.11169	4.40815	4.4011	5.82601	6.13459	6.18036	6.02389	6.01679	6.28958	5.94435	5.65718	5.62321	5.85305	5.96678	5.56807	6.21845	6.0923
ENSG00000198755	RPL10A	5.04315	6.26709	4.82501	5.23753	5.04905	5.32702	5.38003	5.50353	5.25413	5.29358	5.202	4.85199	5.36044	5.20225	5.3245	5.42297	5.67235	5.38331	5.40093	5.5188	5.29543
ENSG00000112936	C7	5.04121	5.7256	4.78614	2.78843	3.42317	3.97776	4.24228	-2.7689	-3.35803	-2.6855	2.22794	0.462197	-1.75286	1.773	-2.75063	-3.81415	-6.0429	-5.09633	-2.21299	-4.62045	-5.36266
ENSG00000179348	GATA2	5.04121	4.15594	4.79538	5.2098	4.84798	4.77474	4.70607	3.1941	3.2304	3.44083	3.75435	3.75876	4.44281	3.80577	3.19356	3.09367	3.39797	3.19106	3.17986	3.97917	3.09619
ENSG00000089737	DDX24	5.03731	5.75025	5.4253	5.92463	4.99726	5.19295	5.43437	4.99357	4.90479	4.8432	4.95913	5.03108	5.24645	5.16201	4.76867	4.70186	4.84407	4.68527	4.57862	4.9927	4.70131
ENSG00000140264	SERF2	5.03731	5.82177	4.84071	5.26422	5.69104	4.952	5.19164	5.59607	5.29826	5.57094	5.22557	4.90651	5.45527	5.15444	5.6208	5.47428	5.5309	5.4485	5.60316	5.44843	5.1048
ENSG00000108256	NUFIP2	5.03536	4.80898	5.18808	5.07944	5.19569	5.32941	5.06187	4.69533	4.92915	4.75246	5.03404	5.09222	4.8783	4.92878	4.63011	4.44505	4.35049	4.65402	4.85987	4.67717	4.88713
ENSG00000126803	HSPA2	5.03536	5.07245	6.52345	6.16306	4.79876	5.3712	5.42426	0.916153	1.71961	2.51949	2.6213	2.511	2.04044	1.36388	-0.0157279	0.433782	1.62244	1.23843	1.18038	0.383012	-0.305828
ENSG00000168487	BMP1	5.03536	4.84285	4.74142	4.75759	4.3324	4.11852	4.18002	3.31197	3.02235	3.09586	2.81047	2.63359	2.76761	3.09532	3.95337	3.82805	3.46819	3.42892	3.55214	3.16141	3.0654
ENSG00000108946	PRKAR1A	5.03341	5.65896	6.02826	5.72242	5.4157	5.62	5.72194	5.11522	5.21562	5.29749	5.05311	5.21316	5.10681	5.12256	5.14159	5.14206	4.87621	5.16359	5.29882	5.03845	5.35146
ENSG00000184584	TMEM173	5.03341	5.26179	5.15436	5.98683	3.75964	4.70187	4.67531	3.78304	3.15463	4.20446	3.82356	4.09382	3.32251	3.5341	4.03932	3.79205	3.65465	3.26812	4.25574	3.14518	3.40221
ENSG00000084652	TXLNA	5.03145	4.89502	4.38226	5.00356	4.29739	4.60256	4.65613	5.03379	5.01868	5.00958	5.08486	5.11975	5.09913	4.91001	4.88226	4.92447	4.84711	4.86015	4.77953	5.00736	4.87966
ENSG00000143569	UBAP2L	5.03145	3.7762	4.87816	4.65486	4.22471	4.22252	4.00435	5.27116	5.18322	5.16339	4.85105	5.46096	4.89864	5.12838	5.13184	4.84818	5.15206	4.53121	4.66305	4.85138	4.45592
ENSG00000150760	DOCK1	5.03145	4.772	4.92732	4.80416	4.51365	5.00382	4.74577	4.40482	4.02168	4.19609	4.00986	4.10234	3.90765	3.97961	4.59557	4.49349	4.62687	4.78085	4.65472	4.22141	4.16454
ENSG00000152558	TMEM123	5.03145	4.99467	6.25951	5.84308	5.61843	5.88957	6.08489	5.29701	5.60219	5.69388	6.07831	5.96285	5.77891	5.72636	5.32634	5.16291	4.97182	5.08837	5.37163	5.47098	5.74091
ENSG00000176438	SYNE3	5.03145	4.20319	3.51263	4.40251	4.02873	4.72566	4.65002	2.64575	2.46313	2.9998	3.17671	3.47701	2.86947	2.83213	3.01566	3.21078	3.0187	2.79589	3.62921	3.07945	2.97401
ENSG00000102755	FLT1	5.02949	4.76511	5.0788	5.21583	4.58313	4.30744	4.5917	5.65404	5.08204	4.80795	4.02253	4.84439	4.48118	5.39524	6.07782	5.65236	5.12096	5.67387	6.04476	5.15573	5.4735
ENSG00000125107	CNOT1	5.02753	4.10588	4.35752	4.68756	5.03495	4.6222	4.44294	5.29997	5.16945	5.27946	5.17123	5.65655	5.0406	5.1276	5.05985	4.99445	5.12514	5.02058	4.67472	5.06511	4.56702
ENSG00000213064	SFT2D2	5.02753	4.51682	5.21931	5.41233	5.2562	5.61315	5.62402	3.87744	3.94645	4.11484	4.46144	4.37085	4.24854	4.18469	3.98775	3.92576	3.84127	3.81614	3.94797	4.18418	4.24123
ENSG00000184640	43352	5.02556	4.62233	4.80684	4.87442	5.20988	4.90147	4.82837	4.6402	4.21241	4.76712	4.59128	4.94135	4.78707	4.42719	4.81161	4.66252	4.35477	4.44256	4.72808	4.81337	3.95959
ENSG00000102908	NFAT5	5.02359	3.52908	5.63671	4.78953	5.35315	4.96667	4.93776	3.78198	3.85367	3.78001	3.69649	4.22832	3.35696	3.32729	4.14211	4.38137	4.16045	3.92247	3.91216	3.46006	3.32534
ENSG00000137575	SDCBP	5.02359	4.66247	5.74321	4.76508	5.34746	5.42026	5.19584	4.6749	4.67835	4.3542	5.08527	5.61845	4.89758	4.66597	4.46077	4.94919	4.10473	4.1218	4.66607	4.53612	4.79919
ENSG00000170027	YWHAG	5.02359	4.54929	4.82951	4.52142	4.375	4.4461	4.4916	5.44207	5.20333	5.21018	5.56828	5.93748	5.25892	5.42703	5.31222	5.54594	4.88315	4.69832	4.5734	5.17109	5.06735
ENSG00000198840	MT-ND3	5.02162	1.70031	3.85072	5.29508	4.52126	4.04623	3.31038	3.6475	3.84917	4.27632	3.04216	4.23608	3.46236	3.47936	3.20954	3.13017	3.70809	1.33233	3.18723	3.11738	2.61707
ENSG00000134910	STT3A	5.01965	5.20574	4.89974	4.98635	4.70168	4.72475	4.88497	5.54695	5.5121	5.47538	5.50528	5.60203	5.59084	5.65943	5.51575	5.32953	5.33196	5.14872	5.13274	5.51939	5.40682
ENSG00000152234	ATP5F1A	5.01767	5.97505	5.12717	5.55358	5.18296	5.58741	5.80358	6.51674	6.27091	6.31892	6.31712	6.20156	6.56422	6.17283	6.30597	6.3355	6.52561	6.45778	6.37676	6.48832	6.47851
ENSG00000153113	CAST	5.01569	4.35173	4.82951	4.92413	4.56852	4.76152	4.67331	4.74735	4.63284	4.96678	4.92535	5.18436	4.69947	4.80456	4.79538	4.58312	4.79971	4.55652	4.4932	4.63675	4.6686
ENSG00000143079	CTTNBP2NL	5.01371	5.0012	5.55609	5.16179	4.61429	4.99631	5.29577	4.50723	4.26852	4.4059	4.56669	4.47947	4.4257	4.30864	4.51213	4.17672	3.91951	4.37215	3.98713	4.32634	4.29019
ENSG00000166272	WBP1L	5.01371	4.73091	4.17486	4.64839	4.17735	4.40135	4.60861	3.51842	3.19774	3.22893	3.33272	3.43379	3.22527	3.0552	3.76979	3.72799	3.40762	3.3961	3.66135	3.15939	2.93393
ENSG00000101445	PPP1R16B	5.01173	4.63752	3.67162	5.24559	4.63781	5.12782	4.97409	5.38067	4.96008	4.81616	4.12556	3.41682	3.62454	3.2932	5.46341	5.17345	5.03146	4.93493	5.28759	4.06416	4.37229
ENSG00000122378	FAM213A	5.00974	5.50376	5.23298	5.4128	4.94166	5.25401	5.58023	5.54727	5.3043	5.72061	5.42166	5.18034	5.58754	5.38265	5.4584	5.71799	5.72128	5.68609	5.65728	5.71021	5.54477
ENSG00000170759	KIF5B	5.00775	5.67826	5.89706	5.85261	5.29517	5.83256	5.92369	5.80996	6.00071	6.03159	6.13969	5.95699	6.08526	6.02446	5.77416	5.7326	5.52711	5.96331	5.75288	5.91505	6.25658
ENSG00000171456	ASXL1	5.00576	4.54124	5.12534	4.77476	4.75427	4.72929	4.55402	4.27888	4.10203	4.22448	4.08668	4.53085	4.07126	4.22792	4.2809	4.32659	4.43789	4.24066	4.15293	4.12697	3.92835
ENSG00000275023	MLLT6	5.00576	4.59753	4.95439	5.03798	4.99908	5.05239	5.03866	3.57095	3.51233	3.74984	3.18576	3.39965	3.3896	3.45613	3.88122	4.02506	4.09281	4.19402	4.15937	3.76757	3.59029
ENSG00000181222	POLR2A	5.00376	3.6979	4.63735	4.256	4.87594	4.13638	4.05147	4.60943	4.3798	3.93969	4.07212	4.79664	3.7013	4.23799	3.90921	4.15651	4.10473	3.61841	3.59	3.80936	3.45524
ENSG00000028137	TNFRSF1B	5.00176	5.87505	4.96261	5.63148	4.94166	4.88124	4.86488	3.91082	3.32847	3.54661	3.99279	4.00803	3.95135	3.70045	3.67515	3.68325	3.43621	3.79198	4.33473	3.62126	3.09502
ENSG00000142208	AKT1	5.00176	4.90132	4.79538	5.10269	4.2524	4.76946	4.76381	5.38975	5.17005	5.28407	5.18707	5.14574	5.27157	5.35317	5.2566	5.1349	5.31776	5.20533	4.94967	5.25216	5.05203
ENSG00000130508	PXDN	4.99976	5.41942	3.5622	4.215	4.61666	4.36335	4.649	6.74156	6.56895	6.36877	5.26769	4.92823	5.24979	5.3962	7.31703	7.18439	7.10149	6.85501	7.14851	6.0225	6.01013
ENSG00000101160	CTSZ	4.99776	4.87381	5.47071	5.49935	4.78829	5.11748	5.24397	5.01855	4.65449	4.81707	4.75359	4.90894	4.89651	4.927	5.0094	4.61309	4.54425	4.38317	4.50632	4.67258	4.57713
ENSG00000137033	IL33	4.99776	5.25907	5.82105	4.67727	5.39101	5.91726	5.16546	0.212324	0.039562	0.632298	2.32932	2.18185	0.997407	1.10557	1.45324	1.40129	-0.709	1.95274	2.44148	-4.07296	-2.44209
ENSG00000188846	RPL14	4.99776	5.72717	4.96466	5.46618	4.99362	5.05673	5.30812	6.05029	6.05348	5.94062	5.7489	5.70489	5.9738	5.81289	5.8568	5.64639	5.79932	5.88269	5.79453	5.82225	5.53573
ENSG00000108424	KPNB1	4.99575	5.0681	5.06931	4.98314	4.9623	5.03125	4.86576	6.46414	6.55313	6.44577	6.60952	6.75589	6.63962	6.55288	6.25539	6.30848	6.23487	6.03764	5.90091	6.51836	6.45781
ENSG00000213719	CLIC1	4.99374	6.07012	4.62185	5.27055	4.73695	4.8171	5.06033	6.64757	6.59784	6.70884	6.31729	6.2305	6.58364	6.55777	6.44939	6.37235	6.33422	6.09023	5.95824	6.47418	6.46848
ENSG00000130382	MLLT1	4.99173	3.90446	4.78149	4.67647	4.81742	4.75531	4.31746	4.1897	4.04285	4.00898	3.94212	4.42957	4.2295	4.23584	4.03783	3.97275	3.97808	3.95158	3.78736	4.01645	3.37736
ENSG00000172053	QARS	4.99173	5.26451	4.45111	4.97864	5.05953	4.96282	5.21598	4.94369	4.57679	4.78397	4.43325	4.39532	4.5346	4.76182	4.95791	4.88496	4.88956	4.94044	4.93629	4.62144	4.7067
ENSG00000124181	PLCG1	4.98972	4.18264	4.61142	4.40635	4.1317	4.40021	3.83152	5.18188	4.72412	4.63411	4.40514	4.44304	4.29934	4.65205	5.21828	5.21822	5.10621	5.02169	4.93316	4.73659	4.6611
ENSG00000176014	TUBB6	4.98972	5.61404	4.71731	5.85577	4.11505	4.56856	5.08621	6.58827	6.72688	7.02899	6.8087	6.83915	6.74369	6.73242	6.54799	6.63254	6.66064	6.24138	6.11786	6.71128	6.48636
ENSG00000150687	PRSS23	4.9877	5.10072	3.47862	5.23969	3.89461	4.0693	4.31875	6.17533	6.40083	6.38619	6.36914	6.04523	6.481	6.88166	6.80773	7.00781	6.8492	7.04892	6.69321	7.01565	7.20879
ENSG00000092199	HNRNPC	4.98568	5.88604	5.34577	5.3539	4.96787	5.24327	5.18954	6.02159	6.25484	6.0255	6.10615	5.8705	6.24359	6.1092	5.84022	5.74678	5.87211	5.79513	5.85715	6.20285	6.10952
ENSG00000130176	CNN1	4.98568	5.32723	4.01398	4.17507	4.67692	4.56247	4.6222	-7.62688	-4.73654	-3.42247	-3.07803	-4.72102	-3.23472	-4.27735	-7.87991	-5.92962	-7.62786	-7.90368	-6.6504	-4.86146	-8.17001
ENSG00000140564	FURIN	4.98365	4.8681	4.74857	5.0932	6.0867	4.5645	4.96755	5.51698	5.3966	5.45449	5.16514	5.30826	5.44463	5.77831	5.59366	5.63532	5.5249	5.44878	5.309	5.43535	5.29568
ENSG00000173230	GOLGB1	4.98163	4.86953	5.16331	4.9559	5.04905	5.09517	5.12344	4.1945	3.94223	4.06977	3.78739	3.58731	3.54618	3.73743	4.23155	4.10058	4.49593	4.75028	4.5143	3.95727	3.91114
ENSG00000065526	SPEN	4.97553	3.57186	4.94819	4.65486	4.85201	4.37728	4.48245	3.87147	3.87743	3.5673	3.72365	4.37085	3.30977	3.76556	3.63923	3.76561	3.92721	3.60362	3.30235	3.51239	2.99928
ENSG00000131873	CHSY1	4.97553	5.00251	5.97639	5.90034	4.85402	5.61413	5.85097	3.50305	3.52179	3.58342	3.81387	3.87019	3.83322	3.6816	3.41298	3.63453	3.37284	3.24543	3.61756	3.421	3.44516
ENSG00000189067	LITAF	4.97553	5.54684	5.91519	5.85718	5.80553	5.31198	5.7441	1.89864	3.00627	3.74411	3.85034	4.05705	3.43819	2.8226	-0.0920115	1.00505	2.45295	2.6841	2.95508	2.46783	1.43176
ENSG00000104964	AES	4.97145	4.79325	4.28064	5.21528	4.72602	4.75886	4.8841	5.05502	4.80455	5.06154	4.68299	4.62401	4.88797	4.89144	5.20174	5.07249	5.10748	5.21283	5.0929	5.05727	4.79053
ENSG00000166949	SMAD3	4.97145	3.79136	4.27073	4.72415	3.72053	3.48469	3.75766	4.90669	4.56129	4.93152	4.26075	4.50378	4.57684	4.18766	5.03054	4.94203	5.61129	5.01835	4.51011	4.87186	4.1151
ENSG00000002834	LASP1	4.96941	5.23265	4.99706	5.38195	5.51683	5.34663	5.50548	5.64997	5.65942	5.76583	5.99547	5.99293	5.84531	5.73452	5.5235	5.56507	5.55841	5.44159	5.6639	5.66255	5.48496
ENSG00000132824	SERINC3	4.96941	5.34173	5.72277	5.45325	5.52694	5.51047	5.51784	4.41922	4.44883	4.54194	4.44333	4.45971	4.36185	4.35102	4.64683	4.5356	4.42844	4.44034	4.76023	4.42835	4.52282
ENSG00000104904	OAZ1	4.96736	6.14374	5.23807	5.252	6.8264	5.51888	5.6574	6.01076	5.96961	6.0937	6.11071	5.90803	6.2715	5.92021	6.03026	6.10689	6.18722	5.98001	6.03997	6.22317	6.16879
ENSG00000136997	MYC	4.96736	5.34224	5.73483	5.54141	4.85201	4.94422	5.33376	4.63551	4.62584	5.02501	4.61713	4.7715	4.69866	4.73617	4.71697	4.51298	4.9967	5.03535	4.37912	4.4317	4.15613
ENSG00000079805	DNM2	4.96531	4.51682	4.5028	4.2687	4.52126	4.10043	4.34673	5.03334	4.645	4.83559	4.71196	4.94135	4.58479	4.77473	4.94246	4.8737	4.83898	4.62697	4.41637	4.56423	4.27163
ENSG00000173482	PTPRM	4.96531	4.75509	5.01299	5.13138	4.73913	4.89745	4.93776	3.30755	3.56815	4.17638	3.51831	3.44053	2.75826	3.17536	4.27015	4.34067	3.74446	3.86492	4.37267	2.38388	3.13662
ENSG00000104408	EIF3E	4.96326	5.76376	5.58302	5.61333	5.62786	6.20521	6.10959	5.38592	5.54817	5.6966	5.42102	5.18135	5.60763	5.30471	5.44834	5.26985	5.22408	5.63463	5.69455	5.40777	5.5301
ENSG00000112159	MDN1	4.96326	4.39704	4.26076	4.36356	4.84395	4.56552	4.61594	4.6709	5.13598	4.64746	4.49274	4.32063	4.46739	4.70591	4.25676	4.21206	5.14754	4.91949	4.38875	4.7349	4.52151
ENSG00000170581	STAT2	4.96326	4.81121	4.84739	4.73182	4.4191	4.68236	4.4453	3.62401	3.41422	3.52673	3.41703	3.41682	3.38758	3.29596	3.73341	3.41837	3.76928	3.81955	4.03523	3.24659	2.90212
ENSG00000177311	ZBTB38	4.96326	5.04171	5.16152	5.592	4.97343	4.91745	4.97246	4.64312	4.59034	4.45112	4.05002	4.13592	4.11827	4.3397	4.38306	4.24904	4.5241	4.30547	4.24265	4.55351	4.75758
ENSG00000075618	FSCN1	4.96121	4.19865	4.54723	4.33263	4.30916	4.73741	4.55183	6.28928	6.00071	5.74016	5.45507	5.44681	5.4813	5.79619	6.28491	6.51202	6.10526	5.86812	6.13322	5.98823	5.86212
ENSG00000116260	QSOX1	4.96121	5.23819	4.85404	4.98763	4.72602	4.99556	4.91076	4.92603	4.33653	4.48871	4.4199	4.79402	4.78669	4.6633	5.4584	5.32875	4.99944	5.01574	5.05279	5.24481	4.83999
ENSG00000123143	PKN1	4.95915	4.61979	4.17486	4.6637	4.2885	4.66637	4.69028	5.61346	5.0543	5.3095	4.9258	4.77416	5.04605	5.35911	5.56083	5.63182	5.56705	5.65295	5.20746	5.35098	5.27358
ENSG00000138758	43354	4.95915	4.47517	5.48363	5.252	5.15552	5.54277	5.43852	5.84619	5.80746	6.3439	6.00635	6.245	6.09039	5.78028	5.72684	5.6794	5.74595	5.8486	5.83199	5.94172	6.01122
ENSG00000011028	MRC2	4.95709	3.70112	3.03948	4.15125	4.59999	4.57562	3.84585	4.11164	2.95415	2.30286	2.43925	2.28273	3.1331	2.56128	4.65074	4.21121	3.5072	4.1748	4.31419	3.90883	3.45706
ENSG00000109111	SUPT6H	4.95709	4.10102	4.74857	4.60896	4.66324	4.51494	4.51083	4.56511	4.29743	4.18134	4.23267	4.65619	4.20335	4.49174	4.5308	4.47303	4.21173	3.91929	4.04048	4.1985	3.79035
ENSG00000148396	SEC16A	4.95709	3.8153	4.59034	4.52231	4.81123	4.32432	4.39503	5.03289	4.87854	4.73764	4.53521	4.92823	4.47549	4.82332	4.77718	4.75132	5.09345	4.58441	4.53716	4.6185	4.19001
ENSG00000160796	NBEAL2	4.95709	4.61894	4.58236	4.45256	4.90336	4.08778	3.66373	5.50256	5.42912	6.15199	5.07151	5.5098	4.91415	4.9495	5.60503	5.54188	6.12588	5.41754	5.66824	5.03625	4.92093
ENSG00000110713	NUP98	4.95502	4.93037	4.78382	5.09736	5.14899	4.64541	4.80289	5.27078	5.3384	5.27913	5.24336	5.58921	5.44512	5.42009	5.03988	4.90406	5.16432	4.91949	4.89569	5.29853	5.05956
ENSG00000050820	BCAR1	4.95296	5.42914	5.38914	5.56779	4.89948	5.08672	5.30617	6.35727	6.50007	6.51732	6.33043	6.50237	6.36294	6.12344	6.38078	6.42417	6.35397	6.09588	6.05704	6.29801	5.92481
ENSG00000161970	RPL26	4.95089	6.17124	4.96466	5.3539	5.26378	5.16444	5.38433	5.46307	5.49923	5.42824	4.91043	4.74454	5.19024	5.24211	5.27569	5.00726	5.11086	4.99549	5.0142	5.17534	4.9318
ENSG00000163479	SSR2	4.95089	5.5553	4.73182	5.2278	4.65173	4.80684	4.91586	6.10836	5.89772	5.92637	5.6325	5.66088	6.07902	5.97843	5.98321	5.54932	5.75652	5.5913	5.45671	5.87502	5.64407
ENSG00000097033	SH3GLB1	4.94881	4.70072	5.48506	5.51588	5.25772	5.49192	5.31843	4.72544	4.70516	5.09342	4.97269	5.10711	4.98294	4.68607	4.80418	4.76183	4.56782	4.70665	4.86514	4.83693	4.92059
ENSG00000095139	ARCN1	4.94466	4.94469	5.20724	5.19156	5.02428	5.08176	5.1825	5.50417	5.45304	5.79035	5.44443	5.85735	5.60806	5.50654	5.40361	5.3014	5.3702	5.26044	5.3339	5.51802	5.48048
ENSG00000141027	NCOR1	4.94466	4.5679	4.76277	4.80706	5.17011	4.55942	4.64388	4.95409	4.88514	5.12791	4.78962	5.1302	4.68105	4.83663	5.07192	4.83387	5.12932	4.88402	4.83359	4.80048	4.66663
ENSG00000169554	ZEB2	4.94258	4.56878	4.48577	3.90764	5.04905	4.91108	4.59595	2.97024	2.97633	2.8986	3.40288	3.80906	3.50209	3.50222	3.23448	3.12656	3.09238	3.30028	3.36873	3.45019	3.06301
ENSG00000110367	DDX6	4.9384	4.10224	5.22787	4.59137	5.54446	5.06966	4.99192	4.6565	4.84579	4.60964	4.85247	5.10711	4.41979	4.80843	4.78253	4.96747	4.3267	4.2883	4.25875	4.66014	4.62582
ENSG00000137312	FLOT1	4.9384	5.36015	5.07691	4.88271	4.97158	5.29312	4.78534	4.5181	4.71343	4.87237	4.68671	4.36201	4.79471	4.67129	4.14488	3.82693	4.11991	4.27654	3.48702	4.60522	3.68056
ENSG00000103197	TSC2	4.93631	3.9128	4.57164	4.34967	4.29147	4.26436	4.12821	4.25079	3.97702	4.05981	3.6428	3.64675	3.59511	4.05479	4.39883	4.17847	4.47772	4.2628	4.26324	3.86181	3.67116
ENSG00000162244	RPL29	4.93631	5.208	4.56355	5.07463	5.09734	5.18637	5.43615	5.56001	5.34694	5.25215	5.07881	5.11345	5.43269	5.24032	5.36341	5.32363	5.52014	5.34943	5.36977	5.30425	5.1396
ENSG00000074181	NOTCH3	4.93422	5.52614	3.01596	3.82832	5.14407	4.50334	4.95934	0.465878	-0.264054	-0.363574	-0.270675	-0.578067	-0.0212429	-0.659963	1.5316	0.997167	-0.176652	1.17046	0.698333	-0.572699	-1.5701
ENSG00000163466	ARPC2	4.93422	5.44792	4.99706	5.26104	4.96787	4.7965	4.90136	6.14099	6.18396	6.33472	6.03707	6.13462	6.1971	6.13657	6.08686	5.98812	6.07312	5.78555	5.88009	6.05109	6.03356
ENSG00000183018	SPNS2	4.93422	4.65005	4.47143	4.60312	3.84293	4.66163	4.93106	3.35683	3.40199	3.09135	3.61963	3.10552	3.04749	3.39701	3.1638	3.15519	3.4308	3.77536	4.12082	3.18442	3.69069
ENSG00000145901	TNIP1	4.93002	5.30205	4.47143	5.08664	5.14899	4.77298	4.54197	4.05304	3.57362	3.93383	3.62407	3.44388	3.47287	3.30693	3.99468	4.14764	4.30841	4.0761	4.07099	3.56671	3.18699
ENSG00000172534	HCFC1	4.92792	3.95785	4.44232	4.68203	4.88972	4.30137	4.30066	5.30182	5.39609	5.19801	4.91632	5.29346	4.93813	5.29406	5.05875	5.08881	5.31886	4.96572	4.83929	5.21329	4.73669
ENSG00000173120	KDM2A	4.92792	4.57054	4.64504	4.83011	4.78619	4.56856	4.35802	4.62962	4.46264	4.49042	4.51083	4.77283	4.42767	4.54254	4.59658	4.39793	4.50367	4.18411	4.36757	4.31732	4.10582
ENSG00000170145	SIK2	4.92581	4.96622	5.53694	6.00783	4.91688	5.10358	4.97001	2.43247	2.37824	2.58503	2.5554	2.43885	2.4762	2.22756	2.59683	2.42058	2.63306	2.88504	2.65262	2.23274	2.08147
ENSG00000048828	FAM120A	4.92159	3.98448	4.65014	4.51344	4.43798	4.25809	4.08357	4.94795	4.91128	5.24236	4.98007	5.40783	4.918	4.91046	4.86176	4.81661	5.03503	4.70296	4.48894	4.8108	4.58508
ENSG00000113369	ARRDC3	4.92159	6.7548	7.38283	6.29728	4.86801	5.72679	6.24245	2.87794	2.99002	2.83357	3.0927	2.83612	2.48567	2.76207	3.65098	3.71724	2.79315	3.5073	3.99676	2.82695	3.16482
ENSG00000078808	SDF4	4.91948	5.38735	4.76748	5.24076	4.48541	4.69817	5.12931	5.09272	4.80223	4.75056	4.71352	4.55587	4.97557	4.93631	5.13811	5.11909	4.91541	4.86802	4.83258	4.91707	4.72348
ENSG00000101040	ZMYND8	4.91948	4.11916	4.86505	4.09409	4.88776	4.74996	4.19269	4.76356	4.55117	4.4263	4.24714	4.80841	4.64179	4.57298	4.78298	4.5679	4.76365	4.61571	4.60562	4.69609	4.38434
ENSG00000133561	GIMAP6	4.91948	4.95617	4.66029	5.44814	4.15797	4.89584	4.90136	5.08543	4.91271	5.23727	4.90405	4.60165	4.39739	4.15918	5.23529	5.36097	4.84051	4.75073	5.3282	4.64615	4.95233
ENSG00000087365	SF3B2	4.91736	4.7143	4.51962	4.68677	4.38616	4.4658	4.53866	5.37646	5.30484	5.31852	4.9805	5.14058	5.18153	5.34054	5.07228	5.17781	5.29639	5.16291	4.76939	5.10341	4.85218
ENSG00000070018	LRP6	4.91524	4.44193	5.53004	4.91675	5.21302	5.34308	5.2056	3.53866	3.61307	3.53671	3.54899	3.75336	3.62111	3.44624	3.80352	3.56156	3.62539	3.57559	3.80938	3.51239	3.70074
ENSG00000122359	ANXA11	4.91311	4.35071	5.10133	5.12906	5.09225	4.89018	4.75814	4.25691	4.17934	4.51193	4.37713	4.71569	4.42028	4.37924	4.35041	4.46948	4.38441	4.25714	4.51137	4.26007	3.97878
ENSG00000133789	SWAP70	4.91311	4.93174	5.4822	5.10977	4.4191	4.79304	4.64798	5.1382	5.14702	5.22876	5.71469	5.89276	5.17364	5.24283	5.02076	5.24634	4.9797	4.81592	4.61385	5.0368	5.04961
ENSG00000118181	RPS25	4.90885	5.63982	5.09386	5.20209	5.33312	5.37468	5.32547	4.99723	5.16523	5.00599	5.0965	5.0165	5.18676	5.1472	4.99564	5.10815	5.08144	5.19386	4.98124	5.12942	4.95621
ENSG00000177119	ANO6	4.90672	4.89992	4.73902	5.02494	4.42992	4.53061	4.74482	4.78225	4.73879	4.92774	4.72183	4.85577	4.54912	4.43033	5.07155	5.02578	4.69772	5.02946	5.05452	4.70026	4.95265
ENSG00000181163	NPM1	4.90458	5.70493	5.36762	5.27894	5.09054	5.53864	5.50322	6.52912	6.8502	6.49576	6.78634	6.77998	7.10777	6.79198	6.17715	6.20876	6.05195	6.42619	6.16679	6.72491	6.5843
ENSG00000089250	NOS1	4.9003	3.29382	5.51473	4.36257	5.90385	5.64805	6.16457	-4.81952	-1.33055	1.57538	0.765954	2.30504	0.561931	-0.100154	-7.87991	-4.34466	-3.72097	-7.90368	-8.23536	-3.79733	-4.08255
ENSG00000005483	KMT2E	4.89815	4.21561	5.44745	5.24559	5.01892	4.78523	4.81387	3.5783	3.559	4.04047	3.53845	4.14006	3.54528	3.39572	3.6539	3.65095	3.78946	3.61841	3.82837	3.32071	3.13776
ENSG00000100353	EIF3D	4.89815	5.64442	4.69032	5.32073	4.94166	5.1584	5.11015	5.85605	5.78996	5.84242	5.44663	5.41383	5.60002	5.6621	5.80143	5.54695	5.99087	6.03158	5.77578	5.56528	5.37145
ENSG00000105323	HNRNPUL1	4.89815	4.62995	4.76982	4.87304	4.9567	4.88124	4.77508	5.76879	5.78054	5.73656	5.5538	5.78578	5.76945	5.71456	5.72128	5.79532	5.82708	5.56227	5.63991	5.80008	5.53853
ENSG00000106070	GRB10	4.89815	4.70633	4.297	4.80197	4.22781	4.29404	4.5052	5.21331	4.69014	4.61854	4.41926	4.38139	4.43257	4.76381	5.3949	5.4026	5.00672	5.15718	5.49224	4.70269	4.88374
ENSG00000117519	CNN3	4.89815	5.37129	5.08823	5.48627	4.80708	5.10008	5.24329	5.03823	5.185	5.29619	5.40724	5.30365	5.35399	5.23782	5.06388	4.98551	5.219	5.16962	5.54672	5.04721	5.26083
ENSG00000136026	CKAP4	4.89815	4.75122	4.22017	4.54859	4.3778	4.11852	4.3226	6.03546	6.03643	6.11364	6.03227	6.30388	6.1743	6.21933	6.10031	6.15707	6.16299	6.12517	5.85798	6.11588	5.8597
ENSG00000185339	TCN2	4.89815	5.03599	5.18632	5.36676	4.31792	5.16176	5.1825	3.58318	2.65406	3.72	3.81485	3.77216	2.70415	3.22395	4.2019	4.29237	3.41994	3.4456	4.24265	3.20805	3.53173
ENSG00000020577	SAMD4A	4.896	4.68131	4.28393	5.2488	3.57219	4.25432	4.43585	3.39479	3.46607	3.5962	4.0022	3.52215	3.76954	3.74754	3.65682	3.3734	3.9753	3.7343	3.31009	3.76092	3.94601
ENSG00000127083	OMD	4.896	3.02031	6.74171	5.77309	5.90094	6.5664	6.81489	-5.30495	-4.25112	-4.11435	-1.03539	-0.751399	-1.55355	-4.27735	-4.42048	-5.19266	-6.0429	-7.90368	-6.6504	-3.3667	-4.08255
ENSG00000131446	MGAT1	4.896	5.07617	4.75805	5.17816	4.53134	4.92932	4.9806	4.30275	4.21591	4.24084	4.43893	4.47783	4.26567	4.13397	4.37777	4.60986	4.13327	4.10019	4.23606	4.32544	4.13005
ENSG00000139793	MBNL2	4.896	4.40495	5.45913	5.4327	4.79458	4.99179	4.92769	4.33854	4.5279	4.9061	4.66047	4.41938	4.43208	4.06776	4.64683	4.24904	4.39277	4.54211	4.49448	4.19505	4.51539
ENSG00000065054	SLC9A3R2	4.89385	3.59105	4.66534	5.47169	4.19013	4.52853	4.57352	3.43988	2.82264	3.17886	3.69015	4.10022	3.72068	3.85521	3.37216	3.61276	3.04368	3.00996	2.7877	2.73778	2.53129
ENSG00000083168	KAT6A	4.89385	4.81196	5.19682	5.12964	5.00632	4.93326	4.82114	4.01743	3.77205	4.02166	3.90793	4.01256	3.70941	3.77151	3.83905	3.72203	3.99373	4.07396	3.89038	3.87479	3.75591
ENSG00000133706	LARS	4.89385	4.9555	4.7051	4.8351	4.41094	4.59563	4.57137	4.93941	5.16463	5.33734	5.11948	5.17934	5.3115	5.16163	5.02265	4.973	5.16065	5.37695	5.02952	5.20695	5.1574
ENSG00000075539	FRYL	4.89169	4.53044	4.83848	4.80343	4.99544	4.7329	4.86488	3.9623	4.29853	4.2783	3.99707	3.92643	3.75239	3.88847	4.17774	3.82471	4.25593	4.35694	4.47781	3.93029	4.15557
ENSG00000122641	INHBA	4.89169	5.13024	3.65649	4.28755	4.2524	4.76417	4.34547	1.80148	1.25894	0.573232	1.75587	2.82072	1.31881	2.31443	2.90717	2.56089	1.72749	2.0693	1.85608	0.709775	2.28223
ENSG00000198198	SZT2	4.88953	3.55241	4.14626	3.93977	4.14817	3.99443	3.52147	3.72019	4.04678	3.94385	4.23195	3.83228	3.94861	4.08539	3.9222	3.74457	4.65783	4.31155	4.23911	3.81578	3.6321
ENSG00000065000	AP3D1	4.88737	4.51955	4.10969	4.54076	4.488	4.15267	4.23549	5.70137	5.33089	5.51571	5.18256	5.26244	5.46655	5.35184	5.70023	5.35404	5.72707	5.53212	5.24581	5.3063	5.01471
ENSG00000074755	ZZEF1	4.88737	3.97919	4.16776	4.4216	4.69721	4.39451	4.27838	4.38609	4.17455	4.38335	4.14036	4.35668	4.31483	4.37924	4.32984	4.08486	4.40659	4.20452	4.11365	4.20536	3.87199
ENSG00000136237	RAPGEF5	4.8852	4.21449	5.71792	5.03427	4.55376	5.21186	4.59064	3.7756	3.19538	3.57054	3.93945	5.0086	3.33931	3.43627	4.1428	4.15297	3.20582	3.10265	3.49469	2.74183	2.7936
ENSG00000171603	CLSTN1	4.88303	3.99892	4.87598	4.65889	4.63313	4.67486	4.58424	4.6565	4.27077	4.28818	4.1185	4.52769	3.88493	4.2734	4.87351	4.94919	4.78656	4.3941	4.3759	4.43879	4.08413
ENSG00000241644	INMT	4.88303	4.16062	3.8057	2.7253	4.68146	4.24675	3.73282	-4.81952	-7.05847	-7.81478	-2.67749	-4.72102	-5.77078	-7.73678	-6.29495	-5.92962	-7.62786	-7.90368	-6.6504	-5.99896	-8.17001
ENSG00000105223	PLD3	4.88086	4.68294	4.74857	5.20925	4.94543	4.82728	5.12858	4.54336	4.14793	4.20654	4.04588	3.71777	4.06369	4.10596	4.89631	4.5818	4.67278	4.91789	4.77079	4.45534	4.05188
ENSG00000127483	HP1BP3	4.88086	4.91799	5.22103	5.10506	5.15389	5.0083	4.97572	4.62194	4.65535	4.58423	4.80681	4.7648	4.61875	4.68134	4.49865	4.63167	4.79446	4.64008	4.73205	4.65943	4.76312
ENSG00000008988	RPS20	4.87868	6.27061	4.96466	5.29353	5.54819	5.67885	5.71122	5.28844	5.11988	5.02855	5.10367	4.88569	5.45455	5.07399	5.05617	5.19816	5.16513	5.17863	5.29249	5.39603	5.21248
ENSG00000182899	RPL35A	4.87868	6.34597	5.29129	5.31359	5.43194	5.8663	5.92496	5.57356	5.74546	5.2508	5.6181	5.40353	5.82662	5.56114	5.40419	5.63469	5.4591	5.23795	5.67613	5.87425	5.77387
ENSG00000113719	ERGIC1	4.8765	4.6975	4.77684	4.89642	4.94732	4.80168	4.86312	5.48083	5.31194	5.81991	5.42166	5.44681	5.19457	5.03533	5.64573	5.42738	5.6973	5.52376	5.27107	5.22925	5.13105
ENSG00000012822	CALCOCO1	4.87432	5.21701	5.2003	5.43364	4.82563	4.82813	4.95604	3.39202	2.94012	3.41343	2.7117	2.41169	2.82541	2.635	3.78231	3.54273	3.83208	4.07682	4.34089	3.05034	2.97145
ENSG00000158615	PPP1R15B	4.87432	5.26505	5.88629	5.14867	5.32879	5.31259	5.44559	3.89325	3.938	4.13468	4.29944	4.4941	4.28857	4.19949	4.01377	3.80113	3.98823	3.98087	4.02468	4.06955	4.29377
ENSG00000162736	NCSTN	4.87432	4.66576	5.08258	5.13717	5.02606	4.77999	4.90735	4.5841	4.23558	4.45988	4.04919	4.42788	4.29235	4.30111	4.88018	4.6118	4.55794	4.17414	4.56736	4.38927	4.07821
ENSG00000165671	NSD1	4.87432	4.66823	4.72216	4.63782	5.13749	4.85493	4.82023	4.64488	4.62409	4.63617	4.53991	4.42957	4.5446	4.52561	4.73549	4.58641	4.84102	4.83504	4.76129	4.66513	4.50484
ENSG00000110108	TMEM109	4.87214	4.26206	4.95851	5.32174	4.58797	4.68236	4.78905	5.01585	4.98079	5.30691	5.15789	5.40267	5.00976	4.90234	5.05249	5.00136	4.7892	4.61423	4.74532	5.00259	4.75201
ENSG00000176658	MYO1D	4.87214	4.28795	4.12443	4.88615	4.26151	4.21994	4.86136	4.28114	3.77679	4.7591	3.93945	3.8374	3.54165	4.05235	4.45296	4.03376	4.23748	4.16946	4.07838	3.93561	4.08117
ENSG00000076108	BAZ2A	4.86995	3.90167	4.94404	4.77254	4.87594	4.5584	4.53646	4.48197	4.27524	4.48356	4.2334	4.71569	4.06811	3.92009	4.44904	4.45588	4.67163	4.40153	4.45835	4.10091	3.72897
ENSG00000112531	QKI	4.86995	4.84285	5.63156	5.23969	5.16365	5.50731	5.3935	4.77959	4.99308	4.91717	5.08204	5.20032	4.87109	4.93808	4.88351	4.74898	4.58129	4.79524	4.95986	4.74031	5.28775
ENSG00000108854	SMURF2	4.86775	4.70152	5.0788	4.92814	4.56116	4.952	5.15687	5.33728	5.65083	5.59686	5.29788	5.52888	5.38113	5.98229	5.4797	5.41153	5.82554	5.80486	5.17787	5.73397	6.09127
ENSG00000133872	SARAF	4.86556	5.46977	5.45913	5.74533	5.31135	5.46063	5.39289	4.58714	4.38913	4.3321	4.4045	4.38139	4.51347	4.09096	4.96027	4.68355	4.42301	4.58441	4.6822	4.53261	4.73857
ENSG00000139218	SCAF11	4.86556	5.12186	5.56828	5.39408	5.38268	5.34722	5.63849	4.15325	4.42887	4.24287	4.62158	4.66914	4.41732	4.42656	4.20257	4.11614	4.14156	4.36106	4.25424	4.21463	4.52934
ENSG00000157227	MMP14	4.86556	5.49684	4.23722	4.5161	4.08114	4.35633	4.73523	7.58497	7.39023	7.12043	6.16619	5.85168	6.41688	6.35656	8.07462	7.95089	7.58945	7.4316	7.2734	6.99167	7.26184
ENSG00000166503	HDGFL3	4.86556	5.16033	5.44011	5.32174	4.44066	5.2458	5.25743	3.87546	4.065	4.16643	4.11456	4.04163	4.13401	4.30659	4.00082	3.79546	3.5907	4.09244	4.11254	4.05116	4.61809
ENSG00000115310	RTN4	4.86336	4.60528	4.921	4.95197	4.24629	4.11852	4.6107	5.74531	6.07419	6.17629	6.28768	6.28857	6.3141	6.09265	5.70892	5.77817	5.61248	5.51773	5.45344	5.99744	6.00857
ENSG00000078674	PCM1	4.86116	4.98085	5.37534	5.17084	5.22859	5.35369	5.23991	4.51043	4.72084	4.96268	4.82621	4.98115	4.73126	4.51618	4.61419	4.70791	4.6762	4.88198	4.93347	4.75576	4.67135
ENSG00000183853	KIRREL1	4.86116	4.7411	4.26076	4.89506	4.98448	5.10497	5.0534	3.99837	3.93518	3.96206	4.08345	4.27615	4.20679	4.17124	3.99161	3.89215	3.95098	3.93355	4.05668	4.18616	4.0567
ENSG00000091527	CDV3	4.85895	5.52931	5.65205	5.94588	5.05605	5.55865	5.70386	5.47723	5.76748	5.63604	6.162	6.08928	5.96571	5.92911	5.45478	5.55704	5.16554	5.39967	5.38727	5.68078	5.74503
ENSG00000129824	RPS4Y1	4.85895	-5.52529	4.79307	5.07463	-4.04986	5.4022	-4.49311	5.41427	5.23011	4.99639	-4.91453	4.82651	-5.77078	-4.03634	5.2196	5.03448	5.20007	-4.73376	5.15736	-5.15097	-4.71058
ENSG00000141503	MINK1	4.85895	3.99106	4.39751	3.99816	4.15145	4.11159	4.06378	4.1442	3.59885	3.90418	3.72158	3.95258	3.52614	3.56985	4.38012	4.23738	4.10642	3.92485	4.08516	3.62419	3.19576
ENSG00000102531	FNDC3A	4.85674	4.72382	5.59762	5.84662	5.15878	5.30775	5.45963	3.84632	4.36096	4.42511	4.47625	4.69472	4.35464	4.25013	4.05783	3.86533	4.05206	4.23555	4.2477	4.04406	4.2407
ENSG00000124762	CDKN1A	4.85674	5.53202	5.7994	5.53835	5.30696	5.58891	5.57486	5.81956	5.30155	4.9125	4.68989	4.12968	4.87326	4.79923	5.51549	5.49437	5.7619	5.38446	5.40861	5.1013	4.99033
ENSG00000077147	TM9SF3	4.85453	5.05434	6.05639	5.20595	5.08713	5.87287	5.82498	4.49239	5.14457	4.7591	5.54446	5.51857	5.61993	5.70578	4.4702	4.69822	4.09878	4.62306	4.83056	5.1537	5.82124
ENSG00000115464	USP34	4.85009	4.24344	4.86943	4.5939	5.12423	4.99631	4.88497	4.34287	4.63893	4.50968	4.55801	4.74997	4.52866	4.41582	4.43325	4.44723	4.54488	4.74085	4.58262	4.51575	4.60498
ENSG00000119596	YLPM1	4.85009	3.61681	4.69773	4.48014	4.79249	4.32312	4.32899	4.1945	4.22172	4.09623	3.82934	4.32063	3.84135	4.23225	4.15935	4.16093	4.33684	4.13764	3.95724	4.12335	3.69224
ENSG00000255823	MTRNR2L8	4.85009	5.67662	4.49431	5.02056	4.72163	4.68516	4.0281	3.85138	3.67709	3.67757	3.37549	4.02829	3.40863	3.40852	3.49132	3.34883	3.93199	3.60659	4.06012	3.79837	3.24731
ENSG00000271447	MMP28	4.84341	5.75025	5.42083	5.86103	5.27282	5.46063	5.81318	-1.47713	-0.868646	-0.121298	0.360263	-1.02059	-0.515276	-1.54695	-1.00955	-1.10519	-3.1043	-0.961166	-0.88663	-1.52648	-1.40183
ENSG00000054118	THRAP3	4.84341	4.65337	5.03851	4.98314	4.98448	4.71838	4.81751	5.40051	5.4266	5.31562	5.30308	5.32473	5.27184	5.38815	5.22485	5.19987	5.25229	5.14906	5.04469	5.32014	5.13989
ENSG00000084207	GSTP1	4.84341	5.38335	4.61665	5.20705	4.49575	4.53787	5.03241	6.52865	6.10219	5.98298	5.7991	5.25769	6.29322	6.20638	6.34069	5.9916	6.25315	6.14829	5.97828	6.52582	6.19624
ENSG00000140400	MAN2C1	4.84341	4.51408	4.97893	4.52672	4.03937	4.0404	4.27441	4.09294	3.93234	4.17992	3.97204	3.48355	3.92097	4.03016	4.17774	4.36538	4.52601	4.59142	4.22995	4.1985	4.10174
ENSG00000143774	GUK1	4.84341	5.81734	5.12717	5.6004	5.91736	4.57361	5.31005	4.75763	4.66647	4.95815	4.72907	4.43295	4.95288	4.78114	4.7583	4.71814	4.8143	4.58892	4.68778	4.80597	4.57755
ENSG00000145391	SETD7	4.84341	4.92626	4.73182	4.89301	4.8399	5.13672	5.07789	4.69533	4.7517	4.79693	4.92894	4.90164	4.9194	4.86615	4.65415	4.54442	4.4672	4.61079	4.55479	4.67893	4.84174
ENSG00000173442	EHBP1L1	4.84118	5.11706	5.09386	4.47649	4.34102	4.26935	4.55183	2.67118	2.81651	3.03618	3.01028	2.7735	3.11248	2.76008	2.49621	2.99023	2.67706	2.37361	2.76394	2.91093	2.35844
ENSG00000162337	LRP5	4.83446	4.4808	5.38149	4.69228	5.19727	5.12919	4.73138	3.46786	2.68468	2.55917	2.96549	3.07556	2.88529	3.53643	4.0251	4.01338	3.70137	3.74782	3.63462	3.38517	2.92604
ENSG00000203879	GDI1	4.83446	4.18609	4.71974	4.65486	4.26755	4.21994	4.02496	4.54336	4.3472	4.34225	4.12791	4.28179	4.33225	4.52561	4.50352	4.2996	4.5241	4.29936	4.21971	4.15914	3.95895
ENSG00000205542	TMSB4X	4.83446	6.6393	6.00355	5.68775	5.30108	5.85431	6.29169	4.60524	4.8719	4.87979	5.38745	4.78081	5.01435	4.64341	4.88972	5.8464	5.50544	5.39108	5.3523	5.5245	6.08479
ENSG00000108510	MED13	4.83221	4.58714	5.14716	4.94671	5.38268	5.08884	5.05802	4.27663	4.32685	4.36357	4.37779	4.3078	4.22781	4.17274	4.36118	4.10975	4.22037	4.37854	4.49363	4.39357	4.42548
ENSG00000137177	KIF13A	4.83221	4.37607	4.35126	4.47831	4.34102	4.79131	4.47671	4.29087	4.33438	4.07358	4.95825	5.09329	5.18327	4.72751	3.96832	3.54002	4.02811	3.82296	3.93175	4.16519	3.67116
ENSG00000010818	HIVEP2	4.82996	4.29116	4.86725	5.60875	4.375	4.50757	4.33662	1.2527	1.38032	1.8091	1.46547	1.78677	0.774573	0.625166	1.95139	1.40129	1.7794	1.86616	1.75191	0.533977	0.526954
ENSG00000049618	ARID1B	4.82996	3.63542	4.56084	4.08454	4.49317	4.19393	4.15147	3.71575	3.72207	3.54771	3.38206	3.79599	3.14868	3.50342	3.64805	3.82471	3.85646	3.56035	3.48189	3.48767	3.33133
ENSG00000136240	KDELR2	4.82996	4.72934	5.38914	4.8626	4.73259	4.85576	5.19094	5.00088	5.03263	4.82885	5.18557	5.50177	5.16719	5.07921	4.73778	4.86939	4.62569	4.354	4.45486	4.96494	4.8949
ENSG00000137834	SMAD6	4.82996	4.18838	4.66029	4.8591	4.50089	4.85327	4.46747	3.37523	2.37407	1.27002	2.89374	2.9156	4.26622	4.79436	2.86744	2.08347	1.60815	2.71746	2.13642	3.25795	2.33481
ENSG00000155849	ELMO1	4.82996	3.80338	4.89545	4.6717	4.35528	4.89584	4.30326	2.79413	2.92595	3.4735	3.03049	3.4031	2.67134	2.22467	3.1222	3.08254	3.3372	2.67091	2.93269	2.18789	1.9267
ENSG00000156515	HK1	4.82996	5.32827	4.49431	4.54686	5.79092	4.36917	4.48703	5.38801	5.35912	5.37797	5.18482	5.28787	5.28002	5.2496	5.39374	5.36978	5.32032	5.28907	5.00409	5.03707	5.15628
ENSG00000167522	ANKRD11	4.82771	3.64546	4.17486	4.1083	4.01802	3.79434	3.82792	4.81373	4.66988	4.52256	4.21291	4.55122	4.0168	4.69184	4.53662	4.62656	4.62155	4.22076	3.77272	4.25488	3.89034
ENSG00000022267	FHL1	4.82545	4.37708	4.76041	4.81502	4.97897	4.8222	4.85606	3.21154	2.51707	3.58769	3.20367	3.19982	3.56863	2.4117	3.35311	2.43524	3.34727	2.86202	2.77237	2.39764	2.23619
ENSG00000078269	SYNJ2	4.82545	3.6134	3.73543	3.6713	3.46584	3.81155	3.53259	4.90864	4.87927	5.07339	4.8866	5.14677	5.10405	5.15177	5.21631	5.06544	5.43064	5.24337	5.08924	5.19148	4.95395
ENSG00000115963	RND3	4.82545	4.51864	4.46276	4.84927	5.1685	5.19032	4.91925	3.60013	4.13813	3.65435	4.9622	4.37261	4.99956	4.5303	3.56872	3.20395	3.28278	3.42892	3.29846	4.29772	4.23113
ENSG00000196843	ARID5A	4.82092	5.09523	5.5963	5.12266	4.52631	5.74213	5.60571	1.78039	1.82111	1.87347	1.89466	1.59488	1.95578	1.73286	2.18752	1.74986	1.745	2.00471	1.92072	1.89949	1.70497
ENSG00000125304	TM9SF2	4.82092	5.21308	5.55609	5.26051	5.08884	5.4197	5.42903	4.3371	4.6398	4.74483	4.89673	4.93897	4.76391	4.66437	4.58998	4.59557	4.19431	4.33681	4.8658	4.57222	4.92621
ENSG00000123562	MORF4L2	4.81866	5.42088	4.91041	5.26474	4.69497	4.93247	5.15111	5.70166	5.68531	5.80303	5.67993	5.61101	5.92541	5.87459	5.655	5.61067	5.59115	5.66843	5.57712	5.8389	5.93859
ENSG00000197535	MYO5A	4.81866	4.65999	3.51263	4.16943	4.29739	4.4991	4.81478	5.47756	5.02335	5.92805	5.66519	5.7871	5.51936	5.70837	5.78709	5.54628	5.75381	5.56838	5.43983	5.98752	6.01401
ENSG00000100393	EP300	4.81638	4.00544	4.67538	4.50451	5.3201	4.50122	4.45934	4.29756	4.18886	4.12663	3.7143	4.1087	3.80627	4.07178	4.06077	3.96671	4.27263	4.02373	4.03523	4.01031	3.51692
ENSG00000136628	EPRS	4.81638	5.06934	4.65522	4.94803	4.68598	4.80512	5.01746	5.36269	5.58561	5.61841	5.61504	5.73396	5.827	5.50416	5.19004	5.16071	5.3152	5.40963	5.31527	5.6323	5.48272
ENSG00000013364	MVP	4.81183	5.66515	4.43937	4.68123	4.0948	4.07216	4.24498	4.44156	4.69014	5.01315	4.68565	3.75336	4.64433	4.56786	4.91633	5.39174	5.02968	5.12198	5.01598	5.22733	4.74792
ENSG00000127616	SMARCA4	4.80955	4.08757	3.93675	4.12935	4.10158	3.75397	3.89835	5.13654	5.014	4.9424	4.75714	4.97304	4.84816	5.11047	5.08929	5.07624	5.30785	5.09332	4.83124	5.02548	4.68349
ENSG00000022840	RNF10	4.80726	4.84938	4.43937	4.89232	7.45015	4.54509	4.74291	5.14482	4.82837	5.11318	4.94589	5.25959	5.06858	4.67711	4.94046	4.96089	5.08316	4.75921	4.79099	4.92985	4.51977
ENSG00000104870	FCGRT	4.80497	5.66226	5.09573	5.50518	5.19727	5.31259	5.60097	3.02507	3.1522	3.35952	3.58702	3.07556	3.30336	3.31918	3.8645	4.37682	4.03258	4.34573	4.48852	3.65818	3.56681
ENSG00000089053	ANAPC5	4.80268	4.82822	4.59564	4.81719	4.50089	4.5726	4.74291	4.89448	4.94399	5.13413	4.91994	4.84439	5.02607	4.96604	4.80286	4.84544	4.99899	4.93847	4.79548	5.02021	4.93016
ENSG00000128294	TPST2	4.79577	4.70152	5.01299	5.10269	4.87989	5.27773	4.97979	3.47444	3.32631	3.83582	3.2475	3.12655	3.07785	2.88069	3.31546	3.28064	3.54269	3.53355	3.47329	2.83582	2.78491
ENSG00000183283	DAZAP2	4.79577	4.6967	5.1722	5.30591	5.23477	4.9238	5.08243	4.41786	4.28527	4.31932	4.06968	4.12551	3.99906	4.10518	4.46133	4.38137	4.46059	4.08749	4.61698	4.24159	4.20421
ENSG00000139641	ESYT1	4.79346	4.77658	4.93988	5.07402	4.84798	4.74011	4.9319	6.05666	6.12996	5.93141	6.12174	6.08338	6.11148	5.91864	5.84193	5.61582	5.69814	5.31745	5.55753	5.76566	5.62288
ENSG00000164035	EMCN	4.79115	4.85733	6.04288	6.06692	5.10242	5.73629	6.14007	3.79991	4.44486	4.44819	4.85719	4.75538	3.53346	3.38022	3.98466	4.48577	3.67649	4.01779	4.464	3.19432	3.85893
ENSG00000160551	TAOK1	4.78884	4.50583	5.23976	4.97928	5.28031	5.17578	5.05494	4.6361	4.94118	4.8889	4.86847	4.84058	4.72408	4.51026	4.83111	4.70851	4.56597	4.86802	4.92215	4.79041	5.02643
ENSG00000167470	MIDN	4.78884	3.27237	6.00355	4.95721	5.42925	5.26217	5.53784	3.255	2.82264	2.71367	2.86776	3.47373	2.20993	3.11419	3.26538	3.44179	2.56566	2.4058	1.83744	2.74048	2.21045
ENSG00000023191	RNH1	4.78652	5.18063	4.32598	4.93613	4.23708	4.36568	4.54307	5.00407	4.76211	5.02815	4.84916	4.54029	5.01859	4.89372	4.9642	4.7431	5.01667	4.84514	4.67397	4.85606	4.59589
ENSG00000071246	VASH1	4.78652	4.7628	3.45549	3.76246	3.77244	4.16075	4.03593	5.07161	4.82608	4.40831	4.39738	3.49329	3.4852	3.77646	4.94961	5.37701	4.09708	4.81549	4.95431	3.79318	4.31355
ENSG00000107554	DNMBP	4.78652	3.34815	4.81595	5.05703	3.62492	3.76814	3.44353	4.35647	3.95485	4.50911	3.99964	4.26102	3.90412	4.44095	4.37895	4.0529	4.83336	4.61669	4.21611	4.41234	4.29019
ENSG00000134644	PUM1	4.78652	4.47141	4.78614	4.8626	4.55376	4.53787	4.43585	4.54898	4.33867	4.40771	4.18237	4.41083	4.22442	4.3629	4.56381	4.34999	4.56535	4.56825	4.38967	4.38366	4.30039
ENSG00000169813	HNRNPF	4.78652	5.65813	4.82501	4.84997	4.7128	5.10567	5.00634	5.41837	5.7157	5.56662	5.72739	5.70419	5.82997	5.66956	5.2034	5.3397	5.43266	5.25256	5.19575	5.63467	5.67204
ENSG00000182934	SRPRA	4.78652	4.84066	4.75805	4.95131	4.34959	4.40135	4.60018	4.89546	4.82913	4.91759	4.79011	5.00633	4.9979	4.8643	4.71604	4.52605	5.03012	4.70711	4.64748	4.82456	4.5809
ENSG00000090621	PABPC4	4.78419	4.49012	4.38226	4.55811	4.48282	4.40362	4.6723	5.17098	4.80223	4.8902	4.999	5.20032	4.99127	5.13686	4.80374	4.73601	4.83029	4.72909	4.57018	4.91557	4.72689
ENSG00000140988	RPS2	4.78419	4.93653	4.60355	4.6214	4.86203	4.92301	5.18883	5.87508	5.73696	5.54208	5.46994	5.44011	5.45503	5.4408	5.75342	5.67601	5.61039	5.4625	5.32581	5.56776	5.23924
ENSG00000158769	F11R	4.78419	5.37834	5.5231	5.31971	4.91496	5.83045	5.21252	3.90791	3.7513	4.19469	3.75537	3.59337	3.50115	2.86592	4.29657	4.32028	4.31648	4.41627	4.74389	3.61759	3.86513
ENSG00000165949	IFI27	4.78419	4.2783	5.82444	7.03047	4.70391	6.16962	5.84251	2.55179	3.16191	4.04281	3.7864	3.66986	3.81155	2.67791	1.99199	2.076	2.95051	2.33592	3.26598	3.06443	0.751827
ENSG00000174099	MSRB3	4.78419	4.98679	5.51613	5.19933	5.04554	5.09236	5.36456	3.38505	3.26233	3.92879	4.22685	4.44806	4.0017	3.76854	3.59125	3.63453	3.51871	3.50624	3.58043	3.68087	3.6868
ENSG00000080503	SMARCA2	4.78187	4.43519	4.86943	4.49823	4.85603	4.63675	4.89534	3.63463	3.75931	3.93047	3.8701	3.82972	3.71987	3.67738	3.70927	3.73275	3.83413	3.84157	3.99256	3.68789	3.77287
ENSG00000108828	VAT1	4.78187	4.89712	5.03656	5.45325	4.76285	4.89826	5.30293	6.34457	6.15205	6.35944	5.75499	5.71742	5.84366	6.01445	6.41979	6.48056	6.47583	6.30432	6.21076	6.16122	6.02143
ENSG00000153201	RANBP2	4.78187	4.87238	5.23128	5.11154	5.03672	5.19032	5.26811	4.69702	5.18262	4.99438	5.00922	4.9449	4.87722	4.98965	4.80681	4.66688	4.76633	5.38215	5.0444	4.99185	5.18079
ENSG00000169641	LUZP1	4.78187	4.51408	5.01299	5.00925	4.85201	4.86403	5.01032	5.14068	4.92131	5.17479	5.11712	5.37129	4.76314	4.93984	5.07009	5.02965	5.05228	4.87706	4.74959	4.9257	4.86048
ENSG00000130147	SH3BP4	4.77954	4.26424	5.09386	5.30025	4.56116	4.8205	4.90905	4.33638	4.31603	4.12736	4.57072	4.32063	4.44573	4.63418	4.22567	4.21206	4.30176	4.33383	3.9242	4.48021	4.29479
ENSG00000137845	ADAM10	4.77954	5.21758	5.4822	5.21801	5.1058	5.30289	5.19444	4.62844	4.70267	4.96432	5.13084	5.36245	4.90606	4.86662	4.81857	5.00431	4.591	4.95372	5.18999	4.7393	5.1013
ENSG00000149177	PTPRJ	4.77954	3.52908	3.82839	3.50048	5.0734	4.59264	4.24363	1.46323	0.45723	1.40196	2.68644	2.9348	2.29208	1.96885	1.60993	0.873432	0.566893	1.48649	0.656426	1.66637	0.930649
ENSG00000273749	CYFIP1	4.77954	4.58105	4.16776	4.47008	3.96695	4.36801	4.33535	4.94131	4.59034	4.89882	4.63429	4.68907	4.62733	4.66383	5.04397	5.07202	5.06932	4.92465	5.07908	4.83567	4.83754
ENSG00000090861	AARS	4.7772	4.34764	3.72579	4.50003	3.69833	3.6564	3.96878	4.61956	4.61351	4.72171	4.5713	4.61213	4.72007	4.50729	4.5607	4.46948	4.91589	4.75297	4.39696	4.68245	4.41706
ENSG00000170542	SERPINB9	4.7772	4.14418	4.79768	5.25945	4.49575	5.26592	4.93441	4.83486	4.29743	4.36668	4.35793	4.73909	4.43746	4.70901	5.08352	4.63738	4.75611	5.25098	5.29102	4.33754	4.51276
ENSG00000100650	SRSF5	4.77486	5.3126	5.86121	5.479	5.27582	5.70164	5.63849	4.4301	4.07017	4.40831	4.19511	3.90955	4.12495	4.23728	4.43098	4.34145	4.46588	4.60931	4.82348	4.58506	4.60786
ENSG00000144746	ARL6IP5	4.77252	4.91592	5.19158	4.96113	4.67919	5.06464	4.98546	4.36003	4.09825	4.54908	4.52099	4.36555	4.53369	4.17049	4.4524	4.05859	4.02364	3.85662	4.44302	4.21025	4.57082
ENSG00000159251	ACTC1	4.77252	5.55174	2.88358	2.06221	3.47631	3.43671	2.52704	-6.04192	-7.05847	-7.81478	-7.72189	-4.72102	-6.50774	-5.41485	-7.87991	-5.92962	-6.0429	-6.31872	-5.428	-5.99896	-8.17001
ENSG00000277443	MARCKS	4.77252	4.94807	5.26825	4.4159	5.12423	4.76417	5.10346	6.10179	6.36556	5.93015	6.05711	5.55394	5.91651	6.05774	6.28287	6.44786	6.09697	6.36581	6.30592	6.23472	7.07163
ENSG00000163660	CCNL1	4.77018	5.11405	5.93623	5.13717	5.40478	5.53709	4.81569	3.34251	3.58989	3.66853	3.66128	3.76145	3.63819	3.64962	3.53001	3.2725	3.67763	3.73158	3.90003	3.50367	3.93491
ENSG00000196367	TRRAP	4.77018	3.5327	4.09105	4.27606	4.62138	4.12541	4.03749	4.40206	4.15037	4.0002	3.87384	4.29485	3.62111	4.12237	4.15248	4.05954	4.60126	4.22206	3.94548	4.05333	3.5055
ENSG00000008294	SPAG9	4.76783	5.07245	5.44305	5.55747	4.69048	5.0853	5.13516	4.15898	4.18886	4.39314	4.47318	4.43801	4.46164	4.38767	4.25932	4.18889	4.28988	4.44477	4.61541	4.1667	4.29326
ENSG00000100030	MAPK1	4.76783	4.61041	4.65776	4.80343	5.34746	4.68236	4.73234	5.20383	5.15372	5.38994	5.38941	5.72433	5.18647	5.19451	5.17316	5.0053	5.09729	4.88198	4.98245	5.14659	5.09809
ENSG00000119335	SET	4.76547	5.23376	4.75805	5.09498	4.56852	5.11955	4.99111	5.57754	5.85311	5.63759	5.88625	5.78379	5.99517	5.8558	5.38994	5.64292	5.39572	5.63778	5.51336	5.89229	6.00077
ENSG00000139613	SMARCC2	4.76547	3.99761	4.60355	4.46089	4.3917	4.4483	4.22045	4.28189	4.05071	4.15784	3.98072	4.10658	4.07063	4.05967	4.44117	4.19493	4.548	4.35223	4.35967	4.04843	3.67351
ENSG00000116584	ARHGEF2	4.76312	4.58279	4.39751	4.94209	4.53885	4.55432	4.46747	4.5841	4.68678	4.77041	4.37976	4.47783	4.15493	4.32358	4.70246	4.54374	4.71893	4.45908	4.55885	4.14799	4.01269
ENSG00000125991	ERGIC3	4.76312	5.7576	4.67538	5.16915	4.65173	4.945	5.32099	4.92555	4.60197	4.77041	4.64798	4.11292	4.60274	4.73769	4.98524	4.74839	4.87173	4.90267	4.69038	4.63639	4.56998
ENSG00000142599	RERE	4.76312	3.22848	4.36684	4.07854	4.42452	4.07216	3.70755	3.69674	3.50473	3.79208	3.14771	3.98288	2.96325	3.31511	3.75897	3.69669	3.76177	3.31488	3.14131	2.96509	2.53302
ENSG00000197043	ANXA6	4.76312	5.49082	4.55269	4.3977	4.89558	4.64157	5.01032	5.9671	6.04367	5.99408	5.74941	5.58845	6.03746	5.89246	5.94554	5.88616	6.03647	6.04733	5.89014	5.90198	5.71901
ENSG00000197965	MPZL1	4.76312	4.88586	4.27735	4.41018	4.54384	4.40021	4.59064	4.67547	4.47047	4.52312	4.93699	4.94609	4.66656	4.55353	4.75467	4.61244	4.38022	4.50066	4.52349	4.58205	4.57082
ENSG00000127946	HIP1	4.76075	5.24096	4.78149	5.4374	4.7413	4.67297	5.11681	3.6358	3.61307	4.13832	3.93409	4.14213	3.65591	3.57781	3.73618	3.79205	4.05645	3.97858	4.13995	3.43608	3.33729
ENSG00000103966	EHD4	4.75839	4.46575	3.81482	4.10594	3.9595	4.35281	4.29414	5.65026	5.77541	5.7274	5.53712	5.98547	5.70546	5.97693	5.47502	5.77183	5.65999	5.33398	5.77263	5.84895	5.78409
ENSG00000124151	NCOA3	4.75839	4.60442	5.36296	5.33892	4.94732	5.06822	5.33249	3.47049	3.34561	3.75649	3.68697	3.81943	3.53528	3.50222	3.65876	3.55889	3.57976	3.58366	3.90259	3.62638	3.34421
ENSG00000049239	H6PD	4.75602	4.60356	4.79076	4.66611	4.84395	5.14013	5.24059	3.17644	3.62189	3.30351	3.14771	3.54107	3.02559	3.75858	4.00235	4.78948	4.21173	4.72954	4.65358	4.07545	4.04643
ENSG00000074590	NUAK1	4.75602	5.01354	5.69835	5.8242	5.21614	5.82665	5.66702	3.21939	3.30238	3.5345	3.8351	3.21168	3.33827	3.43502	3.24744	3.47339	3.41994	3.95391	3.95786	3.10485	3.40221
ENSG00000174600	CMKLR1	4.75602	4.14063	5.16865	5.30334	4.40547	4.41154	4.73619	-5.30495	-3.35803	-1.7487	-0.270675	-1.26159	-3.33782	-2.24493	-4.17947	-3.42712	-3.92742	-2.94948	-3.5915	-4.07296	-3.64645
ENSG00000143621	ILF2	4.75365	5.29781	4.44232	5.23105	4.12839	4.46145	4.64696	6.11974	5.92363	6.07329	5.80327	5.86049	6.07777	6.062	5.83272	5.59769	5.91045	5.81646	5.51713	5.92265	5.85936
ENSG00000105373	NOP53	4.75127	5.33243	4.91041	5.14351	5.05605	5.09166	5.43556	3.93679	3.67878	3.65129	3.41575	2.82587	3.44791	3.51056	3.81401	4.00161	3.86148	4.00058	3.77762	3.59834	3.41729
ENSG00000107862	GBF1	4.75127	3.89887	4.10969	4.42822	4.24323	4.0404	3.80976	4.67605	4.5147	4.62997	4.18838	4.55742	4.41633	4.61001	4.56018	4.25153	4.97228	4.5519	4.51472	4.63167	4.11626
ENSG00000132334	PTPRE	4.75127	4.68781	4.22701	4.09171	4.79667	3.86856	4.18285	5.11185	5.0608	4.66474	4.60258	4.38488	4.43012	4.61388	5.01434	4.64938	4.6357	5.01983	4.62165	4.66477	4.90396
ENSG00000072364	AFF4	4.74889	4.44193	5.59498	5.41852	5.10073	5.05961	5.26944	4.83178	4.80223	4.91675	4.72855	4.97999	4.6515	4.76928	4.79538	4.59883	4.63041	4.61522	4.75776	4.65621	4.70861
ENSG00000173193	PARP14	4.74651	4.45055	5.04433	5.08244	4.8399	5.1584	4.96919	3.24733	3.49516	4.29014	4.05331	4.01932	3.49085	2.85287	3.93747	3.70034	4.17828	4.73408	4.87431	3.32161	3.50727
ENSG00000164116	GUCY1A1	4.74412	4.66082	5.26493	5.04908	5.66037	5.91407	5.09898	-0.295962	-1.22558	-0.363574	2.31566	2.3124	1.16232	-0.114726	0.295012	-1.63194	-2.87298	-0.168971	0.447636	-4.07296	-3.64645
ENSG00000127511	SIN3B	4.74172	3.81233	3.83736	4.13977	3.5673	3.66968	3.35614	4.00384	3.64457	3.79854	3.45491	3.59639	3.30229	3.77052	4.23545	3.90906	4.22037	3.96012	3.69131	3.64237	3.33133
ENSG00000154330	PGM5	4.74172	4.74811	5.41485	5.87978	5.51809	5.7732	5.90841	-4.16745	-3.59904	1.81275	1.96636	1.82844	0.178758	-0.405861	-4.17947	-4.34466	-7.62786	-3.99679	-5.91343	-4.07296	-5.36266
ENSG00000071894	CPSF1	4.73933	4.10709	3.35283	3.72607	4.08114	4.00195	3.44588	4.63257	4.25498	4.28358	4.28689	4.31148	4.41236	4.25722	4.67779	4.48365	4.44661	4.58039	4.48937	4.46762	3.9078
ENSG00000118217	ATF6	4.73933	4.84139	4.91889	5.18152	4.69273	4.61829	4.75149	4.9986	4.95381	5.18926	5.01515	5.10605	5.08456	4.97166	5.10859	4.83553	4.97275	5.01313	5.26212	4.93841	5.04081
ENSG00000130255	RPL36	4.73933	5.89449	4.42456	5.06919	4.86403	5.27525	5.41168	5.24021	5.17365	4.94031	5.22739	4.86831	5.31735	5.29165	5.13811	5.50066	5.34206	5.24337	5.28563	5.45934	5.32046
ENSG00000136238	RAC1	4.73933	3.44529	4.85846	4.70558	4.30034	4.37844	4.42992	4.31893	4.26289	4.34225	4.64471	5.0761	4.29988	4.5408	4.21976	4.50882	4.11907	4.19731	4.10588	4.2732	4.39151
ENSG00000140545	MFGE8	4.73933	4.98283	4.64248	5.14638	3.96695	4.51074	4.35802	2.83562	2.47875	2.62297	2.03133	2.0294	1.20421	1.94446	3.1109	3.0021	3.30509	3.17647	3.18618	1.92822	2.14627
ENSG00000124193	SRSF6	4.73693	4.33838	5.24988	4.75984	4.48541	5.12438	4.94527	4.58227	4.25157	4.17425	4.59976	4.71152	4.62047	4.6216	4.5046	4.41947	4.04412	4.04651	4.33379	4.55582	4.65832
ENSG00000138190	EXOC6	4.73693	4.3821	5.77158	5.0552	4.57097	4.8541	4.70509	4.06965	4.32361	4.52812	4.73678	4.50699	4.46882	3.86453	3.91247	3.80678	4.01915	4.46673	4.7212	3.92079	4.45866
ENSG00000168264	IRF2BP2	4.73693	4.86165	6.0263	5.03303	4.72822	5.07251	4.94693	3.49918	3.44436	3.2957	3.41446	3.43716	3.29585	3.29733	3.87789	3.94843	3.73244	3.99076	4.08121	3.24373	3.49577
ENSG00000149187	CELF1	4.73452	4.62149	4.41859	4.49012	4.57341	4.68236	4.57244	5.04045	4.82532	4.89925	4.852	4.93659	4.90253	4.92611	4.86723	4.74956	4.89839	4.66973	4.78058	4.84794	4.98812
ENSG00000167996	FTH1	4.73452	3.69307	4.29374	3.84255	5.39377	3.52071	3.79507	4.44425	3.66348	3.58663	3.38206	3.99665	3.05514	4.09413	4.39242	4.36462	3.95475	3.17647	3.20291	3.35903	2.2531
ENSG00000187079	TEAD1	4.73452	3.90307	4.42456	4.42444	4.53385	4.70923	4.97897	3.31783	3.28694	3.29047	3.72261	3.80906	3.73106	3.60918	3.3555	3.16929	3.3487	3.45442	3.38257	3.48041	3.41354
ENSG00000198695	MT-ND6	4.73452	0.610842	4.57164	3.53244	3.81432	3.06428	2.11274	3.44257	3.85217	3.6057	2.67365	4.57283	2.41806	3.19617	2.74305	2.8017	2.69969	1.65665	1.95323	1.78371	1.12231
ENSG00000148358	GPR107	4.73211	4.35582	4.87816	4.67568	4.96602	5.00307	4.97327	3.79255	3.71384	3.79762	3.98245	4.30227	3.68085	3.79412	3.80088	3.7268	3.61233	3.69391	3.87349	3.64957	3.44424
ENSG00000117122	MFAP2	4.7297	3.68009	3.90722	3.90628	4.10158	3.87839	4.09711	2.12634	1.37198	1.86293	1.32524	1.34506	1.19038	1.41551	3.55836	2.34805	0.120329	1.75988	1.22612	0.957558	1.3672
ENSG00000185591	SP1	4.7297	4.59321	5.07501	5.12091	5.21927	5.15706	5.12858	4.0653	4.28194	4.52033	4.16343	4.38139	4.21421	4.18989	4.22959	4.15563	4.33395	4.19205	4.34183	4.27367	4.16398
ENSG00000128272	ATF4	4.72486	4.60956	4.4305	5.24773	4.47762	5.16979	5.01112	5.42314	5.3837	5.6218	5.03987	5.12499	5.20865	5.12683	5.15471	5.0185	5.43368	5.3438	5.22369	5.26817	5.21921
ENSG00000135503	ACVR1B	4.72486	4.28688	4.13902	4.04446	3.73804	3.96859	3.79507	2.72295	2.66434	2.86733	2.79085	3.19585	3.03464	2.98004	2.67946	2.64402	2.82438	2.76786	2.81789	2.81161	2.37398
ENSG00000163349	HIPK1	4.72486	4.60528	5.22957	4.74703	5.64884	4.75353	4.81841	4.47674	4.30949	4.51305	4.2283	4.55432	4.16792	4.2755	4.36772	4.18108	4.32888	3.95236	4.06642	4.2899	4.33207
ENSG00000031698	SARS	4.72244	4.9173	4.03754	4.73105	3.93313	4.18868	4.50858	5.2571	5.19153	5.34019	4.79209	4.74862	5.15715	5.22413	5.06791	4.78834	5.18211	4.98981	4.70771	5.19542	4.98623
ENSG00000107331	ABCA2	4.72244	3.30019	3.85515	4.09884	4.12173	3.92972	4.20664	3.16672	2.60864	3.11817	2.97247	3.00916	2.67961	2.98518	3.44708	3.28712	3.42403	3.35312	3.2759	2.94999	2.51561
ENSG00000110047	EHD1	4.72244	4.64254	4.66029	4.3296	4.34674	3.95781	4.82114	4.85366	4.55302	4.60386	5.08245	5.10923	5.01271	4.96431	4.76507	4.83718	4.47968	4.20321	4.25925	5.1227	4.75313
ENSG00000148357	HMCN2	4.72244	4.43808	1.90509	4.54859	5.62197	4.65402	5.77532	-5.30495	-5.47351	-4.64486	-4.91453	-2.3991	-5.28535	-3.21322	-5.07256	-7.51459	-5.30594	-5.09633	-5.06543	-3.67704	-4.71058
ENSG00000188229	TUBB4B	4.72244	4.47517	4.59299	4.99721	3.94072	4.15132	4.28497	6.52723	6.58843	6.3524	6.49478	6.54048	6.57335	6.81535	6.1328	6.11648	6.01182	5.46196	5.16004	6.40846	6.13398
ENSG00000079432	CIC	4.72001	3.88763	4.73182	4.55639	4.3324	4.36568	4.32388	3.95761	3.85517	4.01692	3.65261	3.72606	3.54709	3.56071	4.14419	4.30519	4.21488	3.9953	4.20681	3.52264	3.18368
ENSG00000142864	SERBP1	4.72001	4.61809	5.02482	4.78069	4.51619	4.91427	4.83646	5.17301	5.3021	5.26019	5.58716	5.69577	5.60241	5.48284	4.9918	5.15762	4.87024	4.99775	4.94564	5.25122	5.48227
ENSG00000156298	TSPAN7	4.72001	3.11495	4.61925	4.05917	4.55129	4.84159	4.76664	-0.295962	-0.458557	0.909729	1.91655	2.3124	0.915723	0.0641217	-0.145204	-0.619767	-0.941363	-0.281629	1.35523	-1.30966	-3.12562
ENSG00000171444	MCC	4.72001	4.25989	5.23976	5.17366	4.98814	4.4863	5.09373	4.1857	3.94645	3.84833	4.23558	3.9455	3.8942	3.52942	4.06077	3.50292	4.07474	3.77975	3.49723	3.37042	3.53864
ENSG00000187244	BCAM	4.72001	4.28045	5.23976	5.38827	4.98081	4.5584	5.03476	1.59471	1.80881	2.53505	2.66074	2.53636	1.79756	1.93388	2.19289	2.58476	1.94768	2.54856	2.74264	1.68052	1.36332
ENSG00000157106	SMG1	4.71758	3.94163	4.46566	4.27711	4.81329	4.47014	4.37294	4.26528	4.44982	4.34035	4.32558	4.27615	4.05545	4.30796	4.35161	4.19751	4.5011	4.51496	4.24619	4.34866	4.30597
ENSG00000071282	LMCD1	4.71514	4.66329	5.31879	5.03054	4.51365	5.12507	5.32356	0.860961	0.901532	1.8091	1.79578	1.81813	0.921315	0.751062	0.87163	0.95709	0.859977	0.526772	-0.030787	0.150783	0.226591
ENSG00000149806	FAU	4.71514	5.51978	4.78614	5.18989	4.92837	4.91348	5.26011	5.13114	4.9958	4.7937	4.72028	4.41767	5.0805	4.91942	4.8033	4.92343	4.91444	4.81549	4.69999	4.92837	4.86048
ENSG00000221869	CEBPD	4.7127	4.87309	5.32678	5.55919	5.2562	5.24137	5.0222	-0.638195	-0.163652	0.475234	1.06275	0.833564	1.18574	-0.370456	-0.680242	-0.644221	-0.685349	-0.684512	-0.021039	-1.02627	-1.29965
ENSG00000067057	PFKP	4.7127	5.17312	4.53349	5.62078	3.84698	4.18208	4.60861	6.05249	6.03643	6.24007	5.96713	5.66304	6.54658	6.30497	6.06269	6.16522	6.46399	6.19608	5.66805	6.39341	6.08273
ENSG00000167972	ABCA3	4.7127	3.75315	3.66155	4.0929	3.8907	3.90428	3.70951	4.54023	3.82951	4.68282	4.20848	4.39532	4.64813	3.84959	4.96812	4.62848	5.08057	4.77734	4.80545	4.44087	3.82963
ENSG00000068650	ATP11A	4.71026	4.07524	5.10876	5.82707	4.88972	4.2518	4.90735	4.0835	3.98797	4.76618	4.42182	4.75268	3.95544	4.2692	4.00464	4.10792	4.5203	3.6967	3.88001	3.77286	3.48059
ENSG00000170248	PDCD6IP	4.71026	4.43808	5.2107	5.15439	4.6261	4.68982	4.81751	4.83843	4.78034	5.32748	4.82718	4.91136	4.72887	4.69863	4.92643	4.59034	4.95874	5.03167	4.94284	4.84919	4.91562
ENSG00000244734	HBB	4.71026	6.99442	3.49005	3.34718	14.181	6.06231	8.92366	-5.30495	0.935883	0.370091	-4.26245	-2.60555	-0.357996	0.0114146	-4.70999	0.491039	-0.447954	-5.09633	-5.06543	0.304817	0.120005
ENSG00000134287	ARF3	4.70781	4.33217	4.71974	4.78217	4.49575	4.30137	4.75719	4.78754	4.65277	4.42511	4.35926	4.2322	4.31164	4.35367	4.75467	4.73838	4.58554	4.28892	4.33046	4.46149	4.60374
ENSG00000135720	DYNC1LI2	4.70781	4.66164	4.84517	4.58799	4.11839	4.75531	4.57782	4.59682	4.5232	4.54579	4.73626	4.68199	4.7463	4.5587	4.58131	4.59883	4.3562	4.34395	4.52682	4.6185	4.85599
ENSG00000136731	UGGT1	4.70781	4.87167	4.70019	4.61229	5.02962	4.52437	4.73715	5.10762	5.11302	5.28242	4.999	5.0696	5.16247	5.05581	5.11249	4.96595	5.33738	5.42373	5.18421	5.28401	5.12934
ENSG00000074660	SCARF1	4.70535	4.17109	4.52796	4.14667	4.54135	4.40702	4.42754	4.76087	4.59572	4.37597	4.43641	4.29485	4.31217	4.34437	4.81423	4.91717	4.56659	4.58089	4.60089	4.53534	4.5423
ENSG00000114698	PLSCR4	4.70535	5.20744	6.40394	5.38972	6.23284	5.73042	6.16992	2.19489	2.51328	2.27665	3.74826	3.90225	4.4311	3.01393	2.91043	2.0685	1.94009	2.76432	3.27095	3.60429	2.97401
ENSG00000188559	RALGAPA2	4.70535	4.91868	4.76277	4.25067	4.98448	4.36335	4.15723	3.7378	3.58268	4.66777	3.95891	4.27615	3.60643	2.95758	3.88122	3.8358	4.3879	3.9097	4.29432	3.11738	2.92736
ENSG00000122515	ZMIZ2	4.70289	2.89396	3.87271	3.64879	3.67579	3.47176	3.20594	3.77879	3.68215	3.71318	3.23304	3.55044	3.10144	3.59021	4.02885	3.93508	4.07993	3.6657	3.85045	3.54445	3.20665
ENSG00000124155	PIGT	4.70289	4.03121	4.34813	4.55379	4.21223	4.02573	3.07827	4.13841	3.92524	4.38826	3.78244	3.96897	3.68906	2.75006	4.5191	4.22308	4.39485	4.24702	4.17005	4.00806	2.55876
ENSG00000143870	PDIA6	4.70289	6.10543	5.118	5.07523	4.34674	4.56349	4.91671	5.99231	5.7762	5.78408	5.58915	5.59299	6.03117	5.88424	5.88672	5.70987	5.84774	5.93306	5.79798	5.85146	5.81378
ENSG00000164880	INTS1	4.70289	4.24564	4.22017	4.17169	4.2885	4.0693	4.10308	5.1072	4.90479	4.8148	4.55685	4.66771	4.71203	4.86383	5.09145	4.9984	5.21665	5.22093	5.02247	4.9635	4.75573
ENSG00000198909	MAP3K3	4.70289	4.94129	4.76513	4.79833	4.93977	4.90709	5.07637	4.76087	4.56129	4.7572	4.38107	4.40223	4.53915	4.37468	4.6306	4.61438	4.79131	4.65259	4.8133	4.5431	4.44262
ENSG00000101871	MID1	4.70043	4.10709	4.69527	4.95197	4.17092	4.24802	4.36176	3.06574	3.00896	3.5962	3.52069	3.4134	3.06906	2.41677	2.95377	2.74398	3.13452	2.79589	3.06213	2.64993	2.59569
ENSG00000102024	PLS3	4.70043	5.81919	5.50068	5.66591	4.94543	5.4742	5.72437	6.3562	6.52872	7.18067	6.95952	6.77133	6.78338	6.64483	6.64322	6.65683	6.63048	6.90985	6.74688	6.77619	7.11557
ENSG00000130779	CLIP1	4.70043	4.57493	4.70265	4.34668	4.3778	4.35984	4.39259	4.06965	4.16009	4.10072	4.41093	4.52294	4.3143	4.41011	4.07173	3.81465	3.95287	3.98163	3.9744	4.10825	4.06331
ENSG00000114857	NKTR	4.69797	3.9128	5.82895	4.62305	4.48022	4.42948	4.43349	3.7841	4.16734	3.9986	3.94567	3.60241	3.8384	4.04663	4.13236	3.84791	4.26278	4.4264	4.33236	4.01086	4.27991
ENSG00000135829	DHX9	4.69797	5.28233	4.99305	4.94737	4.78408	4.8034	4.82927	5.65026	5.88716	5.6689	5.75751	5.87485	5.93442	5.81072	5.52456	5.52588	5.42894	5.47665	5.37347	5.99786	5.92892
ENSG00000178980	SELENOW	4.69797	4.88586	4.62703	4.38414	4.26151	4.59761	4.84541	5.39289	5.22491	4.85476	4.52337	4.38488	5.07957	4.70331	5.2986	5.23256	4.88512	4.57079	4.94097	5.14276	5.00569
ENSG00000039523	RIPOR1	4.6955	3.37658	4.40054	4.01586	3.93693	4.07073	3.83691	3.93011	3.68888	4.04436	3.70595	4.38488	3.45274	3.63118	3.61144	3.70398	3.73353	3.24161	3.37981	3.546	3.07732
ENSG00000103769	RAB11A	4.6955	5.13262	5.68846	5.67588	5.02071	5.46444	5.58344	4.59561	4.89754	4.98793	5.01515	5.10393	5.02769	4.59777	4.7483	4.79688	4.39138	4.75163	4.966	4.7096	4.77268
ENSG00000135052	GOLM1	4.6955	5.35964	5.23468	5.37609	4.51619	4.82305	4.85695	4.8486	4.7192	5.04184	4.8722	4.96372	5.13054	4.90956	4.85712	4.84049	4.7431	4.8287	4.68332	4.80952	5.02889
ENSG00000135318	NT5E	4.6955	4.28045	4.83624	4.87442	3.99635	4.92617	4.78534	3.4506	3.7641	4.83739	5.00964	5.15907	4.26017	4.77077	3.68566	3.30958	3.27074	3.45881	3.92546	3.97631	4.59382
ENSG00000136813	ECPAS	4.6955	4.89291	4.52519	4.86469	4.16446	4.69075	4.597	4.92795	5.03462	5.2454	5.0965	5.09969	5.27348	5.05703	5.1029	5.03976	5.2897	5.39395	5.07823	5.30994	5.09399
ENSG00000156535	CD109	4.6955	4.43808	5.93936	5.592	5.09904	5.86093	5.60939	3.97071	4.31928	4.8824	4.24137	4.03052	3.45371	3.79412	4.81771	5.0282	5.02252	5.12232	5.59901	4.32409	4.85806
ENSG00000072195	SPEG	4.69302	3.52908	4.1642	4.24318	4.05343	3.8702	3.87409	-0.968668	-1.12773	-1.27563	-0.427266	-0.879723	0.178758	-0.681496	-1.31006	-2.87073	-2.49858	-1.36452	-1.46717	-0.920012	-2.88461
ENSG00000094916	CBX5	4.69054	3.88904	4.40054	4.51699	5.03848	5.00681	5.03163	5.18027	5.12051	5.37766	5.5427	5.86425	5.18995	5.47252	5.04323	5.25215	5.08445	5.10177	4.99	5.29508	5.24902
ENSG00000100154	TTC28	4.68806	3.63877	4.68038	4.49643	4.74564	4.68049	4.41679	3.28825	2.87669	3.25735	2.95319	2.94431	2.72348	2.92945	3.44258	3.39456	3.48001	3.43003	3.53737	3.0405	2.74213
ENSG00000071553	ATP6AP1	4.68557	4.35071	4.727	4.94341	4.53134	4.35633	4.70116	4.39791	4.0002	4.29145	4.15731	4.41767	4.17554	4.18618	4.52283	4.5451	4.28615	4.06246	4.23199	4.08239	3.86375
ENSG00000099860	GADD45B	4.68557	4.41771	5.85459	6.17126	5.73967	4.41379	5.0127	1.35896	1.24074	1.0022	2.26538	1.12864	2.41608	2.6673	1.29251	1.22351	2.09835	2.25745	1.47373	2.38041	2.04552
ENSG00000173846	PLK3	4.68557	4.73091	5.671	4.02837	4.34102	4.30015	4.30066	2.85189	2.61219	2.42958	2.36159	2.16569	2.56996	2.70927	2.69279	2.43816	2.65638	2.43506	2.27541	2.54097	2.44378
ENSG00000137486	ARRB1	4.68308	3.18781	3.99806	4.12237	4.70391	4.92301	4.59064	4.00111	3.49324	3.46657	3.3912	3.78015	2.95646	2.97144	3.68852	4.22562	3.76928	3.53563	4.07724	3.14518	3.48954
ENSG00000059573	ALDH18A1	4.68058	4.76588	4.17132	4.54512	4.12173	4.14047	4.54416	4.57739	4.35674	4.1607	4.21291	4.25911	4.7863	4.41646	4.35819	4.31791	4.52664	4.45634	4.18381	4.69261	4.41095
ENSG00000180357	ZNF609	4.68058	3.97654	4.57433	4.46273	4.46977	4.34928	4.40232	4.5352	4.42383	4.48643	4.21879	4.40568	4.18894	4.18989	4.56898	4.47445	4.5056	4.43031	4.29334	4.31822	3.82963
ENSG00000118263	KLF7	4.67808	4.60012	5.00505	5.20485	4.51873	4.39451	4.51083	3.43988	3.64975	3.55536	3.54431	3.51579	3.66343	3.78335	3.74442	3.54948	3.64418	3.78151	3.22868	3.73134	3.35795
ENSG00000133816	MICAL2	4.67808	4.64588	3.53487	4.72876	6.32626	4.5492	4.77602	5.23673	4.90912	5.40635	5.45911	5.73601	5.83702	6.14156	5.13881	4.78663	5.23187	4.92822	4.49575	5.75233	5.53918
ENSG00000198663	C6orf89	4.67808	4.46953	4.61665	4.81358	4.74996	4.75619	4.8596	3.47575	3.40199	3.59937	3.60623	3.5994	3.41261	3.52355	3.7426	3.46055	3.48783	3.54598	3.63076	3.37825	3.46978
ENSG00000166750	SLFN5	4.67558	4.23015	4.07216	3.32504	4.44333	4.16611	3.71146	3.43584	3.36044	3.76971	3.49425	3.61734	3.59248	3.54225	3.86113	3.19191	2.97669	3.35076	3.62379	3.32702	3.25047
ENSG00000179010	MRFAP1	4.67558	4.68538	4.75805	4.45163	4.72822	4.68796	4.87103	5.11984	4.76211	4.77931	5.09049	5.2888	5.08549	5.055	4.87685	5.18564	4.73326	4.5824	4.44654	4.8875	4.80745
ENSG00000234745	HLA-B	4.67558	6.23001	5.17751	6.6074	6.33995	5.46444	5.37324	1.81399	1.47681	3.84744	2.64771	2.81555	3.02429	2.06574	2.04638	2.076	3.74663	1.81571	3.62146	1.79415	1.34766
ENSG00000163565	IFI16	4.67307	4.48453	4.99305	4.39287	4.48541	4.50016	4.36176	4.75925	4.93694	4.9231	4.55162	4.97768	4.77592	4.51973	4.80198	4.73778	4.45927	4.61374	4.68444	4.66014	4.64677
ENSG00000081791	KIAA0141	4.67056	4.2783	4.55269	4.63537	4.2091	4.48844	4.66727	3.92723	3.56998	3.64721	3.43609	3.18386	3.41459	3.60363	3.97846	3.75746	3.97344	3.84493	4.00394	3.74621	3.76109
ENSG00000077232	DNAJC10	4.66804	5.05056	5.34262	5.18989	4.85402	5.02093	5.30876	4.80122	4.96147	5.32812	5.4353	5.37041	5.42681	5.11008	5.1132	4.89507	4.83949	5.39567	5.41446	5.36024	5.59765
ENSG00000077235	GTF3C1	4.66804	4.19865	4.30349	4.37045	4.42181	4.13774	4.11792	4.94036	4.7525	4.62842	4.40643	4.59563	4.69907	4.77423	4.8268	4.68846	5.01667	4.79784	4.67397	4.73524	4.45364
ENSG00000124831	LRRFIP1	4.66804	4.56614	5.4013	5.25839	4.29147	4.55125	4.55729	4.49757	4.63719	4.82839	4.77522	4.96723	4.47928	4.61388	4.65025	4.60208	4.41551	4.25019	4.25223	4.28852	4.23911
ENSG00000131653	TRAF7	4.66804	4.40199	4.921	4.45163	4.33816	4.48416	4.15291	5.5341	5.35013	5.16339	4.92355	5.01086	5.12207	5.20041	5.3876	5.27922	5.28334	5.13026	5.31166	5.27028	5.12876
ENSG00000143321	HDGF	4.66804	4.69991	4.54997	4.6693	5.45595	4.28544	4.47325	5.88894	6.07419	6.12231	5.94378	6.01284	6.1721	5.88927	5.7609	5.71288	5.89851	5.73735	5.73771	6.05869	5.81164
ENSG00000173757	STAT5B	4.66804	4.98217	4.29374	4.68598	4.48282	4.46362	4.27574	3.52604	3.45427	3.77252	3.66989	3.78545	3.62025	3.53059	3.67803	3.6906	3.99556	3.8952	3.90259	3.65603	3.56934
ENSG00000101294	HM13	4.66552	2.89115	3.78266	3.63414	3.71169	3.46743	3.36114	4.05743	3.83407	3.77252	3.92872	4.49572	3.75082	4.08539	3.74534	3.97576	3.63011	3.09984	3.11944	3.72589	3.0856
ENSG00000116209	TMEM59	4.66552	5.47869	5.41485	5.37315	5.34603	5.53916	5.54773	3.60734	3.50854	3.60991	3.94034	3.71499	3.82579	3.58796	3.8645	3.91011	3.42403	3.90005	4.12467	3.83614	4.10466
ENSG00000047644	WWC3	4.66299	4.26966	4.54723	4.82294	4.33816	4.11575	4.35301	3.85037	3.76251	3.61305	3.60286	3.27333	3.58105	4.10361	3.87288	3.61147	4.14073	4.09032	3.88196	3.74755	3.79397
ENSG00000107263	RAPGEF1	4.66299	4.24344	4.15705	4.58799	4.15471	4.30987	4.20664	4.82098	4.22635	4.55454	4.21879	4.60915	3.90129	4.19211	4.85162	4.90669	4.80494	4.58039	4.6963	4.35529	4.29836
ENSG00000130066	SAT1	4.66299	6.33902	5.59101	4.791	5.94685	4.13228	4.84719	5.76825	5.49732	5.01791	5.25163	4.83931	5.963	5.29888	5.84747	5.36289	5.82836	6.16199	6.5585	4.49269	4.33307
ENSG00000168488	ATXN2L	4.66299	2.88551	4.08352	3.92647	4.08798	3.70877	3.26578	4.25385	4.34614	4.39619	4.14114	4.95552	4.07314	4.25155	4.08767	4.26144	4.44259	4.01704	4.11254	4.02257	3.53691
ENSG00000068697	LAPTM4A	4.66046	4.66741	5.43568	5.12906	5.03672	5.27463	5.48274	3.74217	3.60953	3.73932	3.90975	4.2874	3.69234	3.64097	3.89611	4.16973	3.46423	3.28181	3.76147	3.72179	3.73349
ENSG00000092969	TGFB2	4.66046	4.69186	4.69527	5.13312	4.11169	4.01834	4.45701	0.597122	0.472911	-0.919967	2.37746	0.0690521	2.22584	0.925	0.0684531	-2.3853	-0.886396	0.146168	-3.0259	0.304817	-0.562683
ENSG00000116729	WLS	4.66046	4.80151	5.08635	4.82223	4.81948	4.92775	5.19164	4.28264	3.85217	4.32381	4.41286	4.71012	3.89136	4.30385	4.54818	4.73126	3.96506	3.92644	3.99136	4.13623	4.23113
ENSG00000119138	KLF9	4.66046	5.50698	6.70112	6.04215	4.80085	5.39423	5.62817	1.97489	2.3317	2.5999	3.18576	3.17581	2.90659	2.61967	2.25066	2.48118	2.45562	2.99643	2.86333	2.2423	2.21477
ENSG00000143570	SLC39A1	4.66046	5.28822	4.60618	4.7932	4.3778	4.47663	4.70706	4.13924	4.22867	4.20724	4.27141	4.01481	4.25906	4.20976	3.90267	4.22139	4.02722	3.73249	4.06757	4.13931	4.05369
ENSG00000108349	CASC3	4.65792	3.91696	4.62703	4.34168	4.71501	4.21478	4.17719	4.2276	4.17335	4.08872	3.82356	4.31698	3.93001	4.25084	4.17367	4.17585	4.1815	3.76032	3.83174	4.10038	3.84366
ENSG00000145741	BTF3	4.65792	4.96154	4.83176	4.88202	5.54073	5.02167	5.03163	5.23052	5.37172	5.32141	5.28986	5.33742	5.36069	5.19193	5.10859	5.06826	5.1368	5.41557	5.22471	5.27215	5.17968
ENSG00000173039	RELA	4.65792	4.32905	5.05014	4.67886	4.13501	4.41041	4.39259	4.1865	4.12082	4.42869	3.96505	4.4514	3.97237	4.16069	4.29595	4.16093	4.34977	3.87399	4.03406	4.03143	3.75961
ENSG00000259207	ITGB3	4.65792	4.35276	3.92837	3.66811	3.8907	4.67392	4.55946	3.83101	3.57362	3.26003	3.78739	4.4811	3.68824	3.92188	3.59835	3.24447	3.1819	3.25303	3.59793	3.29887	3.09619
ENSG00000169851	PCDH7	4.65538	3.86631	4.98903	4.46273	4.66324	4.81795	4.46051	2.04378	2.00492	3.67657	4.05824	4.46137	4.32857	3.81733	2.40664	2.42352	2.65175	1.27374	2.18144	2.99029	2.46207
ENSG00000101558	VAPA	4.65284	4.4836	5.63799	5.02556	4.8338	5.24644	5.15687	4.31893	4.58674	4.58316	4.7657	5.1229	4.87506	4.63473	4.43041	4.43415	4.16289	4.41627	4.51849	4.56003	4.699
ENSG00000149499	EML3	4.65284	4.17572	4.25072	4.00324	4.16769	4.2366	4.08508	3.51459	3.38344	3.46541	3.40675	3.32155	3.51878	3.6816	3.34348	3.66221	3.59554	3.75943	3.63308	3.55678	3.44516
ENSG00000198408	MGEA5	4.65284	4.687	5.02089	4.59053	4.94355	4.77561	4.68431	4.14089	4.2436	4.15712	3.97378	3.91197	3.70455	4.03595	4.09701	4.18542	3.99921	4.40437	4.51304	4.29956	4.43292
ENSG00000068305	MEF2A	4.65029	4.37607	5.43568	5.56134	4.52631	4.7887	4.8719	3.00157	3.00358	3.56838	3.44616	3.65835	3.3055	2.94709	3.16789	2.75571	3.07344	2.92207	3.02615	2.99029	3.08206
ENSG00000168405	CMAHP	4.65029	4.21336	5.7551	5.14293	4.4353	5.29251	4.58317	-2.34148	-1.77307	0.179569	0.640057	1.25626	-0.973764	-1.58703	-0.961051	-1.28577	-1.21847	-1.52864	-0.851654	-1.87795	-2.49759
ENSG00000172354	GNB2	4.65029	4.50215	4.20291	4.56757	4.6261	4.33269	4.56597	5.22037	4.71013	4.82749	4.72907	4.93421	4.79965	4.82092	5.01282	5.1585	5.05447	4.62989	4.71611	4.78322	4.47632
ENSG00000181104	F2R	4.65029	3.96723	4.62703	3.55509	4.00723	4.97738	3.63308	6.26746	6.21256	5.13303	6.21061	5.61845	5.98803	5.84313	6.36378	6.14463	5.73504	6.1153	6.15394	6.10858	6.26611
ENSG00000188554	NBR1	4.65029	4.78721	4.5445	4.53988	5.12922	4.57864	4.65715	4.16957	3.84013	4.20098	3.70804	3.86769	3.89064	3.58571	4.39883	4.32265	4.37108	4.47921	4.51807	3.98032	3.9447
ENSG00000059804	SLC2A3	4.64774	6.56272	6.8708	5.92028	5.45727	6.00026	5.06263	2.25729	1.75851	2.29505	1.00263	2.25243	0.898817	1.22612	2.6348	3.10838	2.3073	2.07217	2.70642	1.38819	1.41683
ENSG00000100731	PCNX1	4.64774	4.19523	4.87162	4.58884	5.03317	4.81197	4.91586	3.60734	3.49899	3.55971	3.60847	3.90225	3.59686	3.66143	3.72046	3.54002	3.89717	3.88381	3.88131	3.56137	3.58529
ENSG00000105329	TGFB1	4.64774	2.28421	3.7545	3.83403	3.96323	3.43449	3.36363	5.00725	4.2252	3.58556	3.52663	4.74726	3.39664	4.31069	4.68447	4.90616	4.01915	3.81955	3.39536	3.80871	3.0315
ENSG00000134313	KIDINS220	4.64774	4.929	4.89974	4.86957	5.30108	4.84494	4.94693	3.94629	3.85965	3.74411	3.92422	3.79599	3.939	4.04007	4.08334	3.89746	3.76177	4.02521	4.05955	4.01366	4.07584
ENSG00000169231	THBS3	4.64774	3.64045	4.76982	4.72646	3.92551	4.19393	4.66626	1.67004	1.69307	1.98125	1.75991	1.35935	2.05068	1.57383	2.12711	2.00308	2.51552	2.07789	2.29505	1.81482	1.2072
ENSG00000196235	SUPT5H	4.64518	4.63416	4.86505	4.54599	4.30916	4.33745	4.37664	4.68402	4.63371	4.39923	4.38369	4.32428	4.4054	4.60613	4.63307	4.63294	4.55484	4.41005	4.36153	4.53884	4.2654
ENSG00000072071	ADGRL1	4.64262	2.89957	4.44819	4.22047	4.26453	4.55125	4.33153	1.37594	1.60331	1.96493	2.16228	2.43885	1.71304	1.35333	1.87997	1.55419	1.41926	1.76343	1.45987	1.18888	0.373018
ENSG00000108262	GIT1	4.64262	4.02737	4.39143	4.5607	3.89851	4.32192	4.26512	4.54711	4.38084	4.64951	4.26573	4.70454	4.38834	4.42341	4.40578	4.5659	4.51201	4.13764	4.41143	4.51338	4.18781
ENSG00000145495	43165	4.64262	3.83738	5.118	4.20733	5.05255	4.83572	4.81932	3.55985	3.42635	3.32157	3.74317	4.12551	3.23653	3.61471	3.39795	3.75396	3.12953	3.14957	3.23987	3.26078	3.31128
ENSG00000160888	IER2	4.64262	4.36801	4.97486	3.87061	5.49639	5.01871	4.14134	2.26034	2.58358	2.33115	2.34823	2.18185	2.30711	2.3573	2.14384	2.49244	2.1971	2.52154	2.07412	2.4365	2.37011
ENSG00000084754	HADHA	4.64005	5.58866	4.86066	5.01492	5.01892	4.98271	5.08545	5.40809	5.22664	5.3933	5.09729	5.06416	5.22343	5.09156	5.39519	5.2003	5.35138	5.37172	5.40884	5.32308	5.1697
ENSG00000100219	XBP1	4.64005	5.00316	4.30349	4.87304	4.315	4.72929	4.89534	4.0504	4.18053	4.49213	4.24137	4.21855	4.52269	4.36092	3.86113	3.86966	4.25898	4.16946	3.933	4.03694	4.01145
ENSG00000123908	AGO2	4.64005	4.37205	4.16776	4.79979	5.51302	4.79996	4.71488	4.81425	4.75331	4.89581	4.83246	5.07393	4.73999	4.93366	4.75331	4.6118	4.83745	4.71493	4.51932	4.66548	4.56956
ENSG00000135624	CCT7	4.64005	5.33139	4.21673	4.69385	4.05343	4.49804	4.36051	6.2343	6.21605	6.15631	6.0944	5.96109	6.33389	6.16644	5.95367	5.80042	6.18241	6.15016	5.78814	6.1455	6.03219
ENSG00000187446	CHP1	4.64005	4.75586	4.75569	4.81863	5.22859	4.95665	4.92263	4.57555	4.33224	4.6718	4.3586	4.74726	4.37005	4.16673	4.75013	4.52742	4.4586	4.40324	4.82652	4.37238	4.30547
ENSG00000052795	FNIP2	4.63748	4.33009	4.86943	4.85068	4.17092	4.87225	4.62739	1.89472	1.79015	2.06327	2.40868	2.65111	1.89456	1.92322	1.84971	1.52159	1.72749	1.7202	1.4806	1.5905	1.44654
ENSG00000063245	EPN1	4.63748	3.96989	4.39751	4.43011	4.32663	4.53165	4.34042	4.31527	4.14182	4.51697	4.18763	4.2553	4.25685	4.22431	4.42301	4.48083	4.44795	4.2227	4.21302	4.33486	4.00398
ENSG00000182087	TMEM259	4.63748	4.22904	4.49997	4.37535	4.00723	4.20309	4.04061	4.27888	4.25498	4.16357	4.16419	4.04385	4.2452	4.3229	4.39067	4.46591	4.46918	4.18941	4.26025	4.38409	3.99521
ENSG00000119777	TMEM214	4.6349	2.61596	4.0453	3.73373	3.67579	3.60207	3.56543	4.3854	4.21358	4.08872	4.10347	4.55122	4.05609	4.16597	3.89199	3.96469	4.09366	3.73158	3.44104	3.94091	3.18258
ENSG00000145990	GFOD1	4.6349	4.13232	4.05688	4.14896	4.98997	5.01649	4.4836	2.70292	2.60864	3.80314	3.5195	4.2438	1.96122	2.78972	3.08226	3.21419	3.27828	2.69902	3.9683	1.56937	2.45295
ENSG00000160145	KALRN	4.6349	3.68172	3.82388	3.46779	3.28106	3.60009	3.61646	1.60434	1.74566	2.24726	1.85365	1.48192	0.685372	1.64908	2.18213	1.6973	1.52442	1.64514	1.84546	0.989721	1.45387
ENSG00000175220	ARHGAP1	4.6349	3.79287	3.61534	3.9358	4.1317	3.62171	4.00435	3.64517	3.34773	3.81594	3.24173	4.05046	3.17467	3.41106	3.56975	3.4677	3.57732	3.11799	3.27194	3.25606	3.01548
ENSG00000106263	EIF3B	4.62974	4.89431	4.33551	4.81213	4.30916	4.37265	4.47671	6.04234	5.98268	6.02491	5.88162	5.83196	6.22845	6.08907	5.71499	5.80805	5.89827	5.63293	5.43651	6.08538	5.91405
ENSG00000164828	SUN1	4.62974	4.71907	5.43568	5.24827	4.315	4.93953	4.94277	4.05831	3.75451	3.9986	4.0963	4.10446	3.83544	3.98987	4.19188	4.14675	4.12075	4.20713	4.10866	3.8145	3.86582
ENSG00000168675	LDLRAD4	4.62974	4.55552	4.78845	4.77179	4.87198	5.15706	5.22902	-1.02697	-1.17583	-0.135305	1.0496	0.833564	-0.0537863	-0.0432913	-1.43697	-1.36484	-3.37994	-0.372299	-0.817506	-1.45053	-1.5701
ENSG00000237441	RGL2	4.62974	4.92489	4.68038	4.66851	4.53885	4.82389	4.73427	3.88141	3.63763	3.87478	3.65695	3.76682	3.69152	3.70875	4.24905	4.10609	3.83515	4.09103	4.33758	3.70252	3.74549
ENSG00000196428	TSC22D2	4.62714	3.11012	5.89599	3.98667	4.92264	4.79477	4.9099	2.79413	2.84992	2.67406	3.06357	3.19585	2.63436	3.12818	2.65827	2.8286	2.78471	2.30942	2.01849	2.66139	2.54509
ENSG00000105854	PON2	4.62455	4.47893	5.4936	5.00735	4.46189	4.50863	5.0611	3.77667	3.89936	4.03501	3.90975	3.95493	4.00763	3.79995	3.82874	3.7852	3.56628	3.74872	3.93926	3.83108	4.22257
ENSG00000136942	RPL35	4.62455	5.81808	4.60618	5.21254	4.93408	4.99481	5.0135	5.72171	5.55232	5.45799	5.24876	5.04661	5.64634	5.56657	5.47475	5.31613	5.59146	5.49733	5.18973	5.44242	5.12303
ENSG00000169180	XPO6	4.62455	4.74578	3.96159	3.82258	5.10073	3.83193	4.16867	5.16	5.13043	5.08853	5.34067	5.47414	5.50732	5.45474	4.91836	4.81437	5.09772	4.7826	4.71502	5.22733	4.99253
ENSG00000185650	ZFP36L1	4.62455	4.65254	4.22017	4.01837	5.20831	3.92182	3.46921	3.30902	3.40608	3.9505	3.59383	4.31881	2.95101	3.68055	3.62143	3.86858	4.1241	3.883	3.71629	3.49569	3.40316
ENSG00000164161	HHIP	4.62195	3.6371	3.84183	2.44091	3.01263	3.18009	5.38984	6.91549	6.98635	6.16954	7.02898	7.41287	6.83011	7.46339	6.79444	6.67052	6.268	6.37716	6.32456	6.95948	6.85673
ENSG00000135956	TMEM127	4.61935	4.20998	4.40959	4.39384	4.47239	4.28051	4.2177	3.91567	3.44833	3.75649	3.48085	3.78809	3.43428	3.57667	4.02434	3.98476	3.66963	3.51891	3.98774	3.62857	3.62643
ENSG00000148672	GLUD1	4.61935	4.80972	4.78614	5.17422	4.21223	4.57965	4.95439	4.24079	4.38396	4.67632	4.61657	4.82265	4.68476	4.38831	4.20257	4.32265	4.40108	4.33024	4.44917	4.54851	4.46638
ENSG00000178035	IMPDH2	4.61674	5.64484	4.08352	4.62552	4.36094	4.56856	4.74959	5.38697	5.4712	5.2427	5.55089	5.42406	5.69856	5.46886	5.12904	5.18867	5.36064	5.46714	5.04585	5.47545	5.17276
ENSG00000103342	GSPT1	4.61412	3.96856	4.43937	4.64108	7.50999	4.59165	4.66626	5.30994	5.41193	5.50277	5.49198	5.85735	5.61022	5.46213	5.185	5.16994	4.99396	5.19649	4.99	5.39989	5.27772
ENSG00000149639	SOGA1	4.61412	3.73288	4.62703	4.3296	4.86203	4.74728	4.66928	4.09208	4.05201	4.07965	4.13493	4.28366	3.81906	4.02934	3.83046	3.96671	3.91758	3.55626	3.21121	3.78534	3.1332
ENSG00000173064	HECTD4	4.61151	3.70272	4.24061	4.04815	5.74076	4.07928	3.91883	3.51714	3.47583	3.34698	3.11968	3.13072	2.97136	3.15273	3.45938	3.50292	3.91565	3.71425	3.46465	3.21	2.68563
ENSG00000169291	SHE	4.60888	4.44289	4.96261	4.61312	4.69273	5.09587	4.68929	4.53141	4.45772	4.52479	4.17785	4.18687	4.11827	4.42781	4.36415	4.37454	4.39346	4.22012	4.60089	4.16519	4.28967
ENSG00000008441	NFIX	4.60625	3.02801	3.99004	3.73373	5.21614	4.25054	4.08054	2.02597	1.35516	2.33623	2.57847	3.17581	2.55924	1.76506	2.09593	1.62752	1.4138	2.20354	2.21688	2.14569	1.04187
ENSG00000041982	TNC	4.60625	6.60452	2.97588	4.39674	3.20123	4.01091	3.65562	-3.23456	2.01031	2.70583	0.202926	-0.00220663	-2.42028	-2.37923	-5.55799	-3.26666	-2.13601	-3.25982	-4.53492	-5.99896	-4.71058
ENSG00000100242	SUN2	4.60625	4.79325	4.55541	4.637	4.40272	4.4483	4.66323	3.77453	4.03495	3.90845	4.23195	3.92883	4.04525	4.10754	3.90186	4.22646	4.00921	3.92485	3.82837	4.17021	4.15894
ENSG00000104517	UBR5	4.60625	4.76588	5.04239	4.74325	5.00632	4.94812	5.00953	4.79018	4.86374	4.99559	4.71039	4.62253	4.86603	4.69132	4.87016	4.59492	5.09217	5.20108	5.05106	5.03267	4.85841
ENSG00000136527	TRA2B	4.60625	4.35684	4.96875	4.41304	4.51111	4.82389	4.31102	4.72323	4.92915	4.68481	4.96702	5.0086	5.01337	5.05622	4.60062	4.61438	4.54112	4.50385	4.47523	4.82679	5.12848
ENSG00000159335	PTMS	4.60625	3.74071	4.90828	4.56586	4.3694	4.41492	4.68929	4.15161	4.59482	4.53034	4.3586	4.2107	4.13641	4.4839	4.52336	5.04503	4.46786	4.4547	4.52224	4.59741	4.37423
ENSG00000175061	LRRC75A-AS1	4.60625	5.85895	4.60092	4.75609	5.1259	5.16778	5.665	5.15469	5.1939	4.8811	5.07557	5.15396	5.41991	5.33284	5.00483	5.20073	5.12514	5.15651	5.3429	5.44408	5.48764
ENSG00000183741	CBX6	4.60625	4.43036	3.36529	3.87892	4.27657	4.59463	4.59276	4.59863	4.42585	4.50517	4.76972	4.82908	4.90993	4.75633	4.46632	4.71213	4.65204	4.38317	4.63018	5.01965	4.7535
ENSG00000097007	ABL1	4.60362	4.53585	4.13902	4.50541	4.57828	4.41041	4.42635	5.04577	4.60375	4.65664	4.53226	4.84693	4.53733	4.74578	4.97826	4.97802	4.87621	4.7467	4.56129	4.93369	4.59631
ENSG00000115183	TANC1	4.60362	4.04012	4.98298	4.46273	4.40272	4.49272	4.76381	4.52889	4.29081	4.28028	4.37318	4.36024	4.08814	4.22286	4.50783	4.5233	4.64506	4.24955	4.32617	4.0075	3.78527
ENSG00000168477	TNXB	4.60362	3.6488	6.1203	5.24505	4.89558	4.87635	4.94027	-2.58249	-3.35803	-3.42247	-0.953702	-0.814134	-2.07034	-2.12207	-5.55799	-4.34466	-3.37994	-3.81622	-3.19096	-3.46291	-5.00009
ENSG00000205726	ITSN1	4.60362	4.07895	4.90615	5.19045	5.08371	4.98423	5.3552	4.29905	4.2674	4.51753	4.74189	4.65039	4.88153	4.4839	4.26315	4.04718	4.28764	4.1748	4.23911	4.26759	3.92175
ENSG00000090376	IRAK3	4.60098	4.41379	5.01695	5.03054	4.77986	5.13877	4.89362	1.84276	2.42333	2.86382	3.19623	3.34686	2.95782	2.29802	1.87997	1.77313	1.68275	1.82594	2.03026	1.91393	1.8087
ENSG00000153904	DDAH1	4.60098	4.57581	4.93988	5.06919	4.77138	4.66163	4.95604	4.52699	4.7035	5.04766	5.0961	5.24332	5.34179	4.75783	4.34016	4.13512	4.5598	4.36574	4.4791	4.77335	4.87387
ENSG00000262902	MTCO1P40	4.60098	-7.11026	-5.49579	3.84397	-4.04986	-5.32373	-6.81504	3.86046	-4.73654	3.50319	-4.91453	-3.98406	-5.77078	-4.03634	3.24615	-5.19266	3.48783	-7.90368	-4.77593	-6.73593	-5.84809
ENSG00000082805	ERC1	4.59834	3.94027	4.49714	4.19517	4.12839	4.32911	4.21632	3.40998	3.30894	3.43965	3.47472	4.11081	3.06906	3.34471	3.2768	3.48189	3.29621	2.96128	2.81789	3.02174	2.53993
ENSG00000116871	MAP7D1	4.59834	4.40692	4.03754	4.4216	4.19965	3.7874	3.96714	4.99403	5.07049	5	4.91678	4.7648	5.00943	5.20225	5.11285	5.034	4.99579	4.95294	4.82009	5.09577	4.77048
ENSG00000070831	CDC42	4.5957	5.6217	5.30591	5.2758	5.25772	5.15301	5.31135	5.46703	5.66498	5.61684	5.62864	5.59601	5.61087	5.52017	5.50014	5.42738	5.19092	5.34943	5.47921	5.68867	5.84043
ENSG00000105953	OGDH	4.5957	4.61127	4.07596	4.73488	4.35244	4.08495	3.99634	4.17846	3.87301	4.31031	3.97725	4.29671	4.29343	4.16974	4.13655	4.03568	4.4114	4.01779	3.9829	4.08558	3.74699
ENSG00000135842	FAM129A	4.5957	5.5615	3.48435	3.54642	5.25772	4.07358	4.46051	-2.87199	-1.08119	0.720491	0.272467	-0.578067	-1.90288	-2.18219	-2.2652	-0.914672	-0.0809689	-0.356786	-1.34054	-1.84516	-3.21582
ENSG00000197969	VPS13A	4.5957	3.92385	5.129	4.69464	5.05605	4.78174	4.92432	2.83971	3.30238	3.48041	3.73395	3.63506	3.42546	3.47815	3.26028	3.26759	3.17223	3.70411	3.69131	3.31347	3.5744
ENSG00000198805	PNP	4.5957	5.58301	4.97486	4.62305	4.84395	4.45379	4.65918	5.70614	5.72309	5.8681	5.50858	5.81781	4.97288	5.50625	5.44525	5.35597	5.22953	4.93217	4.87561	4.9331	5.49165
ENSG00000057704	TMCC3	4.59304	4.88728	5.97943	4.66049	4.47762	5.04149	5.26211	3.73232	4.30949	4.68481	3.6986	3.84249	2.91081	3.36323	4.01755	4.39718	4.13742	3.9422	3.96155	3.27576	3.91911
ENSG00000109332	UBE2D3	4.59304	5.21982	5.22616	5.2987	5.58495	5.22861	5.28727	5.01088	5.16342	5.21502	5.20645	5.16416	5.24143	5.16692	4.95554	4.85201	4.81741	4.93138	5.03128	5.02132	5.35392
ENSG00000111348	ARHGDIB	4.59304	5.25032	4.58236	4.7954	5.61488	4.51179	4.32388	6.3408	6.07515	6.62381	5.66546	5.94993	5.93494	6.2309	6.63683	6.12645	6.36746	6.10921	5.77106	6.24296	6.01308
ENSG00000197081	IGF2R	4.59304	4.96087	4.93361	4.43294	5.59939	4.53476	4.72945	4.28189	4.39737	4.005	4.10823	4.32973	4.11095	4.10203	4.70903	4.60533	4.35263	4.50968	4.31707	4.01366	3.55237
ENSG00000198911	SREBF2	4.59304	3.68497	3.57298	3.6633	3.82256	3.81837	4.06378	4.50915	4.29413	4.84097	4.33373	4.56669	4.34635	4.2272	4.13026	4.38892	4.69435	4.78041	5.11489	4.32274	4.11914
ENSG00000130338	TULP4	4.59039	3.91419	4.42753	4.20512	4.3917	4.69261	4.5142	3.21154	2.81035	3.05789	2.7869	3.05376	2.78151	2.99199	3.29439	3.38099	2.99876	3.19238	2.85277	3.02063	2.88595
ENSG00000160014	CALM3	4.59039	4.82011	4.57433	4.72952	4.65635	4.48844	4.51644	5.73575	5.47705	5.34682	5.39754	5.33652	5.55734	5.41978	5.64646	5.53203	5.81987	5.78861	5.6849	5.78624	5.38037
ENSG00000166326	TRIM44	4.59039	4.56614	4.90615	4.88478	4.5587	4.87389	4.92094	4.08177	4.07274	4.23608	4.41671	4.38837	4.19933	4.06372	4.19322	4.37073	4.25516	4.50173	4.51765	4.27273	4.42127
ENSG00000184634	MED12	4.59039	3.91834	4.06071	3.95689	4.26453	3.74683	3.95066	3.83101	3.80649	3.72389	3.1661	3.20774	3.12101	3.2455	4.24065	3.9392	4.37108	4.31216	4.29285	3.45842	3.20557
ENSG00000169223	LMAN2	4.58772	5.23875	4.48862	4.62634	4.15471	4.39679	4.5052	4.85214	4.80842	4.80291	4.45273	4.40051	4.77747	4.77027	4.88392	4.7366	4.5635	4.57534	4.43286	4.69783	4.52804
ENSG00000005810	MYCBP2	4.58506	4.28688	4.77684	4.565	4.73477	4.5986	4.57675	4.03801	4.3578	4.18345	4.06397	3.87765	3.82653	3.81733	4.1566	4.17498	4.67734	4.67209	4.5164	4.15509	4.17678
ENSG00000086598	TMED2	4.58506	4.89782	4.8825	4.90391	4.59999	4.77386	4.97572	5.35022	5.27552	5.22636	5.54622	5.5945	5.5827	5.43893	5.12237	4.98202	4.61382	4.87788	4.99631	5.21596	5.60302
ENSG00000151468	CCDC3	4.58506	5.04171	3.20117	5.77198	3.06214	3.08141	3.34105	-0.332259	0.441376	0.555903	0.272467	0.103404	-0.500248	-0.47939	-0.428703	1.02845	-0.685349	-1.75393	-0.598734	-2.29852	-3.31203
ENSG00000198961	PJA2	4.58506	5.06872	5.66092	4.99339	5.01173	5.35955	5.29185	3.78728	3.96459	4.02008	4.22246	4.20082	3.91747	3.50103	3.87456	4.00358	3.88241	3.96476	4.01878	3.73473	4.10174
ENSG00000010244	ZNF207	4.58239	4.5241	5.03656	5.08364	4.69721	4.86238	4.82385	5.21685	5.20861	5.1691	4.99214	5.17732	5.25367	5.16579	5.08389	4.84544	5.23652	4.88116	5.10491	5.10157	5.21948
ENSG00000144579	CTDSP1	4.58239	4.49569	4.80227	4.76508	4.39722	4.59165	4.6982	3.4182	3.37512	3.65435	3.64498	3.9455	3.60296	3.46596	3.73985	3.87397	3.55142	3.60955	3.8936	3.63367	3.34026
ENSG00000184007	PTP4A2	4.58239	4.71748	5.03851	4.9073	4.81742	4.67955	4.46167	4.9616	5.16885	5.22019	5.04112	5.30088	4.91485	4.98068	4.60163	4.86615	4.55173	4.41853	4.6162	4.75342	4.70976
ENSG00000071537	SEL1L	4.57971	5.14801	5.24314	5.02681	5.00813	5.07394	5.31005	4.34502	4.58313	4.37288	4.72028	4.55587	4.68476	4.59554	4.57824	4.24738	4.12744	4.46018	4.43508	4.39957	4.68076
ENSG00000112419	PHACTR2	4.57971	4.57405	5.96722	5.8901	5.63372	5.40447	6.022	4.95267	4.83369	5.34996	5.33323	5.41126	5.31284	5.10577	5.07519	4.69273	4.7431	4.9087	5.25236	5.12399	5.40989
ENSG00000136485	DCAF7	4.57971	3.7838	3.84183	4.05917	4.42452	4.25684	3.9899	4.61003	4.42383	4.54249	4.31119	4.60915	4.38075	4.51085	4.659	4.58246	4.66302	4.63184	4.53221	4.52362	4.40055
ENSG00000102580	DNAJC3	4.57703	5.07617	4.87598	4.68282	4.65635	4.75442	4.94859	4.31013	4.06888	3.9355	4.53167	4.86331	4.65276	4.45952	4.34258	4.10518	3.79683	4.0392	4.25875	4.32364	4.72953
ENSG00000134247	PTGFRN	4.57703	4.92695	3.91995	4.61561	4.33528	4.77474	4.68431	3.60134	3.36044	3.98975	3.81776	4.10234	3.83025	3.84771	4.44623	3.861	4.03703	4.85725	4.71902	3.91781	4.16174
ENSG00000163191	S100A11	4.57703	4.25114	3.59432	4.59474	4.34389	3.26248	3.42217	4.83894	4.75331	5.10761	4.15578	4.88198	4.43502	4.67976	4.6916	4.1741	4.24134	3.96321	3.87088	4.13828	3.71454
ENSG00000108639	SYNGR2	4.57434	4.23681	4.36063	4.60896	4.14817	3.96859	4.36674	3.65331	2.72453	3.22756	3.8002	3.28085	2.85785	2.90618	3.54583	2.94587	2.85293	2.75899	2.84479	2.62966	2.14627
ENSG00000124570	SERPINB6	4.57434	4.42064	4.76748	4.32758	4.03937	4.60157	4.35802	4.44492	4.06112	4.35796	4.30706	4.74997	4.38733	4.43534	4.79803	4.62144	4.51009	4.76985	5.13383	4.31233	4.19767
ENSG00000204569	PPP1R10	4.57434	3.485	4.40658	3.77291	4.27056	4.11298	3.45992	4.23227	4.05201	3.95299	3.86917	4.10446	3.96765	4.08619	3.99775	3.87934	4.01103	3.9105	4.03406	4.03639	3.83034
ENSG00000074370	ATP2A3	4.57165	2.98382	3.81936	4.3675	4.00723	6.22813	2.9745	-1.95445	-1.70092	-0.654914	-0.190505	2.09062	-0.726383	-3.82989	-3.12503	-3.60769	-4.16843	-3.25982	-3.7118	-2.488	-5.00009
ENSG00000105640	RPL18A	4.57165	4.67968	3.91572	4.88958	4.46977	4.58366	4.80197	5.13363	5.18322	5.06652	4.58161	4.53085	4.83711	4.98667	5.1523	5.01265	5.05272	4.997	4.94626	4.97186	4.72386
ENSG00000114650	SCAP	4.57165	4.33527	3.93257	4.26448	4.08114	3.87184	3.95398	4.46224	4.09951	4.10891	4.19884	4.18687	4.20163	4.0838	4.51803	4.27942	4.2188	4.11626	3.97318	4.06793	3.88018
ENSG00000102882	MAPK3	4.56895	3.96989	4.4156	4.52496	4.49575	4.4461	4.21494	4.3826	3.93942	4.45522	3.82742	4.03052	4.00631	3.90572	4.38071	4.11249	4.37319	4.07038	4.17748	4.0259	3.4525
ENSG00000149480	MTA2	4.56895	4.96355	4.61404	4.6073	4.19648	4.48523	4.46631	5.63976	5.47656	5.36621	5.37828	5.28413	5.62508	5.53279	5.47805	5.49367	5.33377	5.22351	5.26436	5.51979	5.46037
ENSG00000101161	PRPF6	4.56625	4.28367	4.39751	4.43011	4.54881	4.68609	4.3828	4.09037	3.87153	3.81685	3.84179	3.76682	3.72707	3.98646	3.91003	4.03856	3.92816	3.9422	3.69205	3.68789	3.5438
ENSG00000123636	BAZ2B	4.56625	4.19181	4.93779	4.52496	4.73259	4.61437	4.4453	3.57341	3.24873	3.36823	3.12282	3.00463	2.91642	2.77991	3.89034	3.27739	3.49949	3.71608	3.70091	3.12257	3.3908
ENSG00000163629	PTPN13	4.56625	4.19181	4.64248	4.26976	4.27357	4.85077	4.18144	1.11121	1.47681	1.47754	2.17747	2.52374	1.92549	1.57383	1.18886	0.630073	1.23942	1.27871	1.50442	0.826313	0.568079
ENSG00000111859	NEDD9	4.56354	5.79118	6.45294	6.43493	3.75534	4.53684	5.92496	3.2611	3.56267	3.76783	4.19958	3.62623	4.40639	4.33569	3.52363	2.88736	3.10769	3.59965	2.38761	3.92317	3.49488
ENSG00000197256	KANK2	4.56354	4.38009	3.61534	4.02837	4.51365	4.36101	4.65002	3.14708	3.1522	2.94094	2.57159	2.66843	2.80287	3.09532	2.92018	3.00996	3.23555	2.93316	2.76112	3.23609	3.02043
ENSG00000203485	INF2	4.56354	3.5327	4.60355	4.35365	3.68936	4.1834	4.10308	4.4382	4.40147	4.51417	4.55278	4.55432	4.50976	4.34371	4.40346	4.55386	4.59825	4.2846	4.48253	4.42457	4.0567
ENSG00000004534	RBM6	4.56083	4.31128	4.74857	4.17956	4.03937	4.09763	3.77274	3.87744	3.78152	3.72098	3.77945	3.68412	4.05609	3.92722	4.11196	4.04623	4.10812	4.19336	3.95168	3.78207	3.54294
ENSG00000137693	YAP1	4.56083	4.36598	4.61665	4.3675	4.24629	4.62317	4.70607	3.15694	2.75371	2.81184	3.16152	3.56899	3.09155	3.11419	3.31546	3.13197	2.85696	3.23267	3.47329	2.71046	3.33629
ENSG00000163625	WDFY3	4.56083	4.41966	4.33868	4.1615	4.90142	4.4658	4.45351	4.53141	4.61705	4.38397	4.57704	4.48924	4.56528	4.63527	4.65852	4.41874	5.1817	5.14736	4.99961	5.08571	4.9818
ENSG00000124214	STAU1	4.55812	4.14182	4.52519	4.63209	4.7413	4.34692	4.35552	4.48132	4.27748	4.64593	4.39218	4.76077	4.34427	4.46993	4.64144	4.49978	4.35263	4.43812	4.41905	4.34866	4.08117
ENSG00000138594	TMOD3	4.55812	4.79701	5.18983	4.84786	4.68372	5.00082	4.96181	4.29905	4.40863	4.54962	4.74495	4.85451	4.55093	4.18989	4.47461	4.5233	4.23439	4.41345	4.46919	4.3802	4.52891
ENSG00000152795	HNRNPDL	4.55812	5.02961	5.18983	4.89027	4.48282	4.76946	5.05494	4.48784	4.97599	4.81298	5.07111	4.8733	5.02542	4.98026	4.63455	4.95124	4.57885	4.85766	4.79824	5.25547	5.5098
ENSG00000196419	XRCC6	4.55812	5.45699	4.57701	4.89232	4.21849	4.59463	4.88237	6.06061	6.06161	5.93141	6.0055	5.99064	6.20371	6.00036	5.7764	5.83483	5.88377	5.80852	5.58871	6.02804	5.99025
ENSG00000107290	SETX	4.55539	4.66741	5.15974	5.01051	5.12257	5.12919	5.1388	4.2346	4.57316	4.42571	4.26928	4.18085	4.15374	4.17873	4.45966	4.24155	4.40522	4.85308	4.79583	4.21657	4.4844
ENSG00000138166	DUSP5	4.55539	5.21026	6.92548	6.5621	5.25316	5.85306	6.54348	2.31123	2.39891	3.11964	2.65641	3.07988	2.32409	2.48118	2.29376	2.80622	2.95051	2.40807	2.88941	2.16594	1.9372
ENSG00000141448	GATA6	4.55539	3.52546	4.97486	4.64433	4.10833	4.46362	4.0896	1.80983	2.49804	2.17248	3.06193	3.15549	3.23429	3.02228	2.06113	2.23863	2.03569	2.00471	1.89264	2.35947	1.7622
ENSG00000101210	EEF1A2	4.55267	3.65378	4.13902	4.76134	3.64826	4.09201	4.02338	0.961835	-0.344225	0.943438	2.21033	2.41853	1.52751	1.18506	0.254512	-0.746401	-0.913618	-0.196322	-0.0604325	0.214384	-0.839097
ENSG00000188677	PARVB	4.55267	4.09981	4.28393	4.74779	4.23708	4.56957	4.33535	4.76087	4.42987	5.01553	4.16876	4.22051	4.36801	4.31341	5.02604	4.75249	5.10282	4.84304	4.52266	4.58881	4.4357
ENSG00000115694	STK25	4.54993	4.57054	4.26742	4.58291	4.00361	4.27308	4.26245	5.67562	5.47802	5.77123	5.49985	5.39489	5.56852	5.51219	5.69409	5.47357	5.59599	5.38475	5.36954	5.33475	5.1697
ENSG00000168386	FILIP1L	4.54993	4.26097	4.12809	3.90493	4.74996	4.22637	4.42516	1.89472	1.94996	2.80084	3.53609	3.31056	3.23204	2.67155	2.26856	1.8096	2.39866	2.2397	2.58721	1.7084	1.61952
ENSG00000109787	KLF3	4.5472	4.21336	5.8017	5.77977	5.43463	4.98498	5.16974	3.30016	3.36044	3.577	3.32319	3.49329	3.03722	3.04212	3.30682	3.10288	3.30509	3.19632	3.58602	3.2636	3.51517
ENSG00000162645	GBP2	4.5472	5.76184	4.23042	4.72569	4.46715	4.36452	4.76381	2.70067	2.66434	3.73836	3.42086	2.48518	3.19212	2.38605	2.92341	2.92525	3.26771	3.69018	3.99856	2.18987	2.12805
ENSG00000125266	EFNB2	4.54445	3.88056	4.85625	4.76881	3.91014	4.87061	4.33535	4.86422	3.7513	3.21105	3.36359	3.26955	2.92201	3.30145	5.36043	4.70004	4.02364	4.89256	5.04556	2.80258	3.41823
ENSG00000213625	LEPROT	4.54445	4.33941	5.31237	4.8351	4.82563	5.11471	5.01588	3.05348	3.32847	3.70141	3.45117	3.69823	3.45081	3.29182	3.47268	3.48471	3.48001	3.39381	3.88456	3.47312	3.82681
ENSG00000070614	NDST1	4.54171	4.17109	3.29537	4.16377	4.315	4.10043	4.18848	6.00214	5.66924	5.77802	4.77322	4.78611	4.78324	4.61333	6.34114	6.61042	6.28343	5.99085	5.82458	5.46405	5.57786
ENSG00000099995	SF3A1	4.54171	3.12695	4.52241	4.41018	4.49832	3.96552	4.07751	4.41854	4.26064	4.34225	4.0947	4.81101	3.96292	4.2272	4.17774	4.18715	4.10981	3.62916	3.51409	4.07972	3.52739
ENSG00000089280	FUS	4.53895	2.06217	4.49431	2.74059	3.84698	3.74504	3.40292	4.66112	4.57407	4.13029	4.84678	5.32018	3.92097	4.7488	4.10771	4.89878	3.57732	2.91889	2.13642	4.22045	2.71949
ENSG00000198793	MTOR	4.53895	4.0515	3.78266	4.29586	4.17735	3.78217	3.82972	4.81684	4.75331	4.88327	4.4496	4.48436	4.66114	4.59106	4.86471	4.56989	5.00581	4.74939	4.58701	4.66406	4.38769
ENSG00000083444	PLOD1	4.53619	5.01935	4.48005	4.55552	4.51619	4.4494	4.57782	6.1936	5.80977	5.89699	5.44569	5.68376	5.51335	5.71302	6.34356	6.17836	5.75598	5.7631	5.75359	5.67884	5.34013
ENSG00000110880	CORO1C	4.53619	4.61127	4.92311	4.65969	4.77351	4.36568	4.88757	5.28133	4.99172	5.56419	5.86671	6.245	5.30697	5.43518	5.20871	5.51315	5.01757	4.42078	4.44829	5.01603	4.60868
ENSG00000125503	PPP1R12C	4.53619	4.3841	4.75805	4.60479	4.09139	4.36917	4.2876	3.95573	3.93659	3.86689	3.8822	3.63506	4.04653	4.01435	4.12185	4.19923	3.85646	3.68924	3.88261	3.91123	3.69688
ENSG00000105483	CARD8	4.53343	4.17225	4.297	3.58419	4.43261	4.30865	3.89835	5.16693	5.10046	5.4498	4.77272	5.10711	5.13265	5.1763	5.21235	4.91874	5.3152	5.29	5.07823	4.9961	5.00943
ENSG00000102317	RBM3	4.53066	4.64505	4.69527	4.05061	4.65635	4.92063	5.48617	5.21055	5.25583	4.59752	5.45756	5.332	5.30216	5.62777	4.90738	5.07296	4.24212	5.0802	5.13982	5.54648	5.9852
ENSG00000120254	MTHFD1L	4.53066	4.61468	4.01398	4.87857	3.51746	3.94695	4.47901	4.22213	4.09951	3.94302	4.10506	4.2322	4.19587	4.48148	3.83218	3.88683	4.20858	4.13146	3.65148	4.30641	4.32209
ENSG00000138107	ACTR1A	4.53066	5.01354	4.20291	4.8577	4.51873	4.62512	4.60123	5.67247	5.416	5.45215	5.21641	5.19336	5.60111	5.40581	5.63246	5.42408	5.66489	5.43241	5.32199	5.54146	5.3177
ENSG00000146072	TNFRSF21	4.53066	4.78948	3.20811	5.00102	4.62845	3.77342	5.35583	3.11037	2.73757	3.003	2.82404	2.70803	3.27853	3.14357	3.97846	3.39005	3.56011	3.53771	2.74264	3.09959	3.2452
ENSG00000163931	TKT	4.53066	5.10679	3.49573	4.03953	4.75642	3.94383	4.01706	6.59961	6.23025	6.05587	5.85283	5.73053	6.21769	6.28654	6.27909	6.14953	6.52513	6.34417	6.18375	6.31261	5.79496
ENSG00000088812	ATRN	4.52789	4.32072	4.35126	4.51433	4.45925	4.33269	4.5917	3.70348	3.59527	3.75555	3.42468	3.46715	3.46619	3.65393	3.99084	3.81241	3.81352	3.72886	3.74657	3.74149	3.60271
ENSG00000100060	MFNG	4.52789	4.54929	4.22701	4.5276	4.29739	4.66163	4.47786	5.1927	5.09603	4.9449	5.13512	5.10605	5.3287	5.24068	5.19774	5.36059	5.33377	5.10247	5.17787	5.51071	5.18051
ENSG00000107186	MPDZ	4.52789	4.58367	4.45403	4.02837	3.77244	4.70923	4.43585	4.0451	3.9295	3.93131	3.7007	3.61437	3.53437	3.75758	4.24324	4.23319	4.3512	4.71951	4.56413	3.82026	4.00585
ENSG00000116984	MTR	4.52789	4.04646	4.32598	4.55293	4.25544	4.47986	4.55402	4.21822	4.33974	4.23472	4.17028	4.27427	4.20908	4.33502	4.29906	4.38364	4.40108	4.54314	4.3759	4.40042	4.48529
ENSG00000134982	APC	4.52789	3.39058	4.33868	3.8326	4.61666	4.30623	4.15003	4.12341	4.10581	4.14195	4.35393	4.55432	4.58655	4.19137	4.10415	3.73037	3.85646	3.97015	3.95416	4.24445	4.01269
ENSG00000162654	GBP4	4.52789	4.92006	5.32199	5.49395	5.34174	5.17445	5.47412	2.48816	2.9373	1.88739	4.06316	3.35044	4.00236	2.86592	0.655361	-0.238461	0.891773	1.18113	1.95076	0.785017	-1.05107
ENSG00000108312	UBTF	4.52232	4.22681	4.20291	4.16943	4.38059	4.33626	4.28628	3.79571	3.84315	3.59514	3.8822	3.84756	3.88708	4.15006	3.97612	3.90906	3.83413	3.79459	3.76076	3.85372	3.77945
ENSG00000117020	AKT3	4.52232	4.3861	4.78614	4.78733	4.29443	4.90709	4.66727	3.6729	3.73188	3.79116	4.3791	4.50699	4.13461	3.88207	4.12396	4.08579	3.98914	4.39924	4.27021	3.82026	4.04764
ENSG00000105397	TYK2	4.51953	4.58454	4.19943	4.14437	4.06388	3.87676	3.61855	4.13259	4.02966	4.12001	4.08909	3.90468	4.17203	4.17274	4.07973	3.96064	4.07388	3.87069	3.94548	4.00301	3.72821
ENSG00000110090	CPT1A	4.51953	3.98843	5.10505	4.69464	4.64942	4.67955	4.82385	4.67204	4.54284	4.28883	4.61824	4.93778	4.45153	4.65902	4.8011	4.73601	4.2398	4.11834	4.34561	4.07277	3.9434
ENSG00000147677	EIF3H	4.51953	4.89291	4.55269	4.90051	4.67919	4.87798	4.8093	4.8866	4.64759	4.95732	4.5638	4.47291	4.83266	4.6078	4.74876	4.55251	4.67848	4.87378	4.69186	4.6821	4.62217
ENSG00000179364	PACS2	4.51953	3.96723	4.07596	4.35861	4.11839	4.24041	4.2571	3.70795	3.39994	3.8403	3.50873	3.6054	3.6676	3.49864	4.10771	4.07834	4.19192	4.18544	4.24669	3.74822	3.42571
ENSG00000066322	ELOVL1	4.51674	4.42064	3.98196	4.90594	3.59159	4.00045	4.25576	4.31966	4.35145	4.4364	4.56727	4.84185	4.6703	4.71624	4.51106	4.31157	4.21016	3.76919	3.99796	4.41361	4.30141
ENSG00000148730	EIF4EBP2	4.51674	4.26533	4.30025	4.71412	5.04554	4.93247	4.86312	4.27059	4.20304	4.52923	4.26218	4.78081	4.1454	4.20684	4.50945	4.54847	4.31941	4.39065	4.67022	4.31641	4.32908
ENSG00000011114	BTBD7	4.51393	3.62361	4.27073	3.84114	4.32952	4.28791	4.16296	3.52477	3.04875	2.90717	3.22867	3.43379	2.98478	3.45613	3.38863	3.21419	2.90059	3.14003	3.15642	3.07196	3.48954
ENSG00000082781	ITGB5	4.51393	4.29222	3.12259	2.68163	3.75104	3.56196	3.63514	3.98091	3.32415	3.77252	3.90428	3.85262	3.84356	4.06533	4.27269	4.22477	4.41756	4.35577	4.37544	4.64182	4.45364
ENSG00000141522	ARHGDIA	4.51393	4.0628	4.20291	4.18739	3.8907	3.84536	3.79875	4.95973	4.94751	4.96144	4.78764	5.1229	4.81325	5.03904	4.94325	4.98202	5.0049	4.7552	4.55519	4.73862	4.47497
ENSG00000159461	AMFR	4.51393	5.00641	4.08729	4.95131	4.84798	4.67955	4.85606	4.42059	4.16854	4.65053	4.58503	4.36732	4.58919	4.50252	4.69208	4.51436	4.64622	4.60881	4.52806	4.60151	4.54488
ENSG00000162733	DDR2	4.51393	4.04519	4.16063	3.61271	4.31208	4.6991	4.30455	3.45859	3.05917	3.85897	3.49183	4.35846	3.16527	2.34137	4.16755	4.5552	4.01012	4.35164	4.91613	3.9786	3.51166
ENSG00000167680	SEMA6B	4.51393	4.50031	3.85515	3.47146	3.88285	4.065	4.21494	5.10635	4.98011	4.35796	4.59185	4.55277	4.20163	4.20684	5.73261	5.65612	5.16757	5.22866	5.41379	4.70304	4.98718
ENSG00000197712	FAM114A1	4.51393	3.8848	4.1784	4.57185	3.55747	4.03894	4.25173	4.28788	4.16854	4.42928	3.92961	3.89	4.0999	4.00764	4.43269	4.26718	4.68927	4.41062	4.19849	4.20438	4.11972
ENSG00000143624	INTS3	4.51113	4.08018	4.76982	4.22264	4.14817	4.32792	4.05147	4.13758	4.06371	3.88522	3.82838	4.02157	3.64412	4.0766	4.15523	4.15474	4.27639	4.25398	4.08685	3.78861	3.58779
ENSG00000169744	LDB2	4.51113	3.68009	4.5445	4.40922	4.13832	4.46254	4.03749	3.89325	3.7878	3.79762	3.03217	2.78413	2.63607	2.90437	4.36296	4.49069	4.30841	4.47705	4.69925	2.49048	3.19357
ENSG00000095787	WAC	4.5055	4.49198	5.05399	5.12383	5.00813	4.78523	4.69424	4.58956	4.54932	4.61488	4.45522	4.68199	4.54912	4.53556	4.53292	4.40614	4.44393	4.34454	4.54948	4.41868	4.42967
ENSG00000118900	UBN1	4.5055	3.85336	4.01002	4.07613	3.97804	4.08212	3.99151	4.47411	4.23902	4.32828	4.25217	4.31148	4.24631	4.39025	4.4496	4.5552	4.55484	4.39238	4.23606	4.47332	4.29581
ENSG00000122176	FMOD	4.50267	4.07027	5.09946	3.82258	1.89656	4.31832	4.50971	-3.23456	-2.81054	-1.70626	0.968111	1.88877	-3.13851	-1.10742	-4.17947	-7.51459	-7.62786	-6.31872	-4.77593	-6.73593	-5.36266
ENSG00000124225	PMEPA1	4.49985	4.30072	3.4671	4.47558	4.36658	4.12816	3.9655	2.36038	2.07339	2.35889	2.14694	2.0294	1.56014	2.75006	3.24227	2.91063	2.33069	2.73385	1.20135	2.18591	2.32284
ENSG00000139514	SLC7A1	4.49985	3.81826	5.39675	5.78751	3.56239	3.77166	4.29545	4.86673	5.06662	5.2164	5.13668	5.61845	4.64897	5.00827	4.44399	4.57652	4.6904	4.09032	3.92672	4.65155	4.25442
ENSG00000183020	AP2A2	4.49985	4.00153	4.28393	4.40731	4.2091	4.30865	4.22731	4.73369	4.30073	4.42332	3.99879	4.00349	4.09619	3.98304	4.93327	4.66377	4.68983	4.58792	4.56048	4.09247	3.89102
ENSG00000120451	SNX19	4.49417	4.33631	4.71244	5.08244	4.69273	4.53476	4.3226	4.12759	4.26627	4.41854	4.0022	4.27804	4.2022	3.95714	4.19924	4.12521	4.44192	4.05451	4.26772	4.12955	3.64417
ENSG00000120733	KDM3B	4.49417	3.82417	4.29048	4.26024	4.488	4.42166	4.23277	4.06704	3.81267	3.91016	3.55946	3.93361	3.67424	3.72828	4.0819	3.99667	3.94436	3.76032	3.91026	3.94619	3.48686
ENSG00000143641	GALNT2	4.49417	4.62488	4.44232	4.15695	3.86701	3.81155	4.34294	4.63433	3.94645	3.77814	4.32285	4.37261	4.52729	4.6369	4.53345	4.46876	4.05206	4.08394	3.82432	4.67364	4.13348
ENSG00000222009	BTBD19	4.49417	2.91072	4.87162	3.46227	3.64363	3.65259	3.3052	2.32877	2.17275	1.73404	1.40997	1.09489	1.82168	1.95147	3.05893	2.81297	3.18992	2.76077	3.06671	2.42982	2.37205
ENSG00000103994	ZNF106	4.49133	4.16877	3.68163	4.31946	4.65404	4.52228	4.33535	4.58956	4.61881	4.51641	4.74546	4.8482	4.86458	4.87724	4.38306	4.29076	4.64913	4.6702	4.49235	4.61225	4.50131
ENSG00000198265	HELZ	4.49133	3.89467	4.2872	4.17394	4.61429	4.31832	4.24634	3.89913	3.87448	4.10743	3.81776	3.86018	3.79261	3.83545	4.00082	3.73985	4.00921	4.04432	4.21405	3.93089	3.84226
ENSG00000105701	FKBP8	4.48847	4.86953	4.39447	4.71257	7.73654	4.74011	5.02377	4.53834	4.30512	4.44231	4.13959	3.6054	4.16674	4.243	4.66963	4.72948	4.59403	4.90669	4.86152	4.41572	4.22472
ENSG00000148468	FAM171A1	4.48847	3.66864	4.22359	4.19073	4.01083	4.57663	3.84585	4.31527	3.63415	3.89817	3.91247	4.05046	3.88135	4.10675	4.3341	4.10518	4.20384	4.26906	3.82972	4.12024	3.96088
ENSG00000157540	DYRK1A	4.48847	4.62064	5.02286	4.85138	4.9567	4.71838	4.75054	3.644	3.87005	4.01692	3.94212	3.92403	3.87848	3.94666	3.86954	3.75629	3.76499	3.89843	4.21405	3.93029	4.05248
ENSG00000164924	YWHAZ	4.48847	4.57142	5.24314	4.56328	4.90724	4.86568	5.08092	5.10168	5.26261	5.17656	5.56077	5.71256	5.29733	5.34454	4.99986	5.30699	4.91396	5.02835	4.99991	5.29163	5.51024
ENSG00000197386	HTT	4.48847	3.4182	3.77333	3.70441	4.00723	3.79261	3.65562	4.25691	3.95346	4.01533	3.65261	4.07664	3.6099	3.83734	4.07392	4.12068	4.43182	3.92406	3.65529	3.85247	3.21639
ENSG00000075292	ZNF638	4.48562	4.71669	4.93361	4.56414	4.59279	4.78523	4.79368	4.09208	4.35674	4.28358	4.29527	4.18687	4.16321	4.1622	4.36712	4.21885	4.33612	4.63329	4.58462	4.28204	4.5066
ENSG00000112081	SRSF3	4.48562	5.00251	4.95645	4.68519	4.41638	4.95433	4.76098	5.019	5.4848	5.14177	5.57058	5.43422	5.60394	5.46489	4.70481	5.0364	4.98247	5.06481	5.24202	5.47302	6.00218
ENSG00000107104	KANK1	4.48276	5.25907	4.9357	5.90408	4.53134	4.12679	4.7872	3.5235	4.03098	4.68531	4.69253	4.21267	4.54279	4.64287	3.58616	3.3191	3.95381	3.62819	3.05639	3.90883	3.89102
ENSG00000112697	TMEM30A	4.48276	4.40298	5.93727	4.89506	5.00089	5.47366	5.62246	4.56634	4.87338	4.56865	5.04195	5.1166	4.67403	4.46932	5.10824	5.29619	4.79236	5.22769	5.50811	4.60188	5.41952
ENSG00000120708	TGFBI	4.48276	5.68801	1.37457	3.46963	3.57706	3.31892	4.09711	4.33204	3.41828	2.07244	0.577322	-0.751399	0.711426	3.58459	3.95811	2.32304	3.12284	2.5299	1.18038	3.88887	3.54294
ENSG00000139178	C1RL	4.48276	4.69186	3.49573	4.00956	4.10496	3.69214	3.40292	1.72406	1.78388	1.98773	2.11574	1.83867	1.88886	1.1671	1.94186	2.17716	2.52822	2.3167	2.68574	1.71391	0.882554
ENSG00000140948	ZCCHC14	4.48276	2.71152	3.86834	3.9595	3.60119	3.72521	3.41258	2.6826	2.32307	2.2062	2.24822	2.70803	1.90023	2.35466	2.55367	2.78805	2.33936	2.08926	2.32974	1.98403	1.97082
ENSG00000169714	CNBP	4.48276	5.37783	4.84071	5.04539	4.85201	5.09938	5.19724	5.0181	4.9461	4.92858	5.02903	5.25482	5.25284	5.19894	4.93607	4.94305	4.79814	4.88809	4.76094	5.18107	5.46989
ENSG00000124783	SSR1	4.47989	3.93755	5.01101	4.21719	4.58071	4.67673	4.61594	4.50337	4.99647	4.08947	5.06663	5.30826	5.078	4.73006	4.22108	4.49279	3.66733	4.24384	4.40872	4.62547	4.58174
ENSG00000124177	CHD6	4.47701	3.93072	4.31959	4.27606	4.05692	4.31108	4.14714	3.12884	3.04875	3.00779	2.85081	2.50458	2.72188	2.70927	3.44032	3.29679	3.63129	3.83989	3.82837	3.19629	3.19028
ENSG00000142102	PGGHG	4.47701	3.83006	4.07596	3.72454	4.13501	3.27989	2.9581	3.19887	3.0721	3.31256	2.45927	2.2902	2.658	2.83023	3.71581	3.51539	3.88833	3.73882	3.77412	3.00498	2.7088
ENSG00000008710	PKD1	4.47413	3.97919	3.90295	4.52672	4.01083	4.33745	4.13552	3.23343	3.12764	3.2371	3.26324	2.92523	3.32778	3.2849	3.37924	3.35809	3.57732	3.40523	3.50147	3.54677	2.91679
ENSG00000027075	PRKCH	4.47413	4.70152	5.08069	5.16349	4.44866	4.50546	4.78627	4.26907	4.15403	4.52534	4.54285	4.35312	4.50418	4.30864	4.22959	4.33051	4.33105	4.3918	4.6119	4.24683	4.38049
ENSG00000055917	PUM2	4.47413	3.49058	4.69773	4.15467	4.77563	4.4306	4.33026	3.60734	3.53118	3.35451	3.76042	4.27427	3.12586	3.59358	3.3471	3.63707	2.87696	3.06858	2.91883	2.97085	2.88459
ENSG00000110075	PPP6R3	4.47413	4.39307	4.76041	4.6613	4.40272	4.47878	4.45351	4.43213	4.39737	4.42153	4.45771	4.44973	4.5446	4.42467	4.45576	4.22224	4.23903	4.34336	4.43905	4.43212	4.64957
ENSG00000140332	TLE3	4.47413	4.66987	4.07975	3.93181	4.44333	3.4804	3.80427	4.04864	3.84466	3.66953	3.59496	3.89491	3.69724	3.94928	3.97456	3.96368	3.97251	3.70134	3.71993	3.76757	3.45706
ENSG00000212907	MT-ND4L	4.47413	1.49337	4.47431	3.43997	3.60597	3.18538	2.26977	3.23343	3.6872	3.13139	2.78293	4.49895	2.90094	3.22105	2.65439	3.22772	3.05951	1.51206	2.69907	2.72282	2.12576
ENSG00000100097	LGALS1	4.46836	5.93874	3.22872	4.04077	3.77669	3.49538	4.54636	7.66253	7.34687	7.56287	7.22278	6.93763	7.48776	7.45471	7.70249	7.40526	7.44523	7.27463	7.35654	7.74665	7.67761
ENSG00000100934	SEC23A	4.46836	5.23432	4.91254	4.92279	4.62845	4.94734	5.12344	5.28919	5.44709	5.63527	5.47855	5.32473	5.74482	5.42671	5.23659	5.16115	5.28334	5.5	5.47921	5.46752	5.67577
ENSG00000083312	TNPO1	4.46546	4.28367	4.84517	4.21062	4.7304	4.82559	4.68232	5.99047	6.15418	5.93435	6.11525	6.09782	6.1276	6.03667	6.06196	5.99061	5.94898	6.17088	6.33527	6.21347	6.7752
ENSG00000146112	PPP1R18	4.46546	4.55018	4.33551	4.70869	4.11505	4.10463	4.49955	5.1353	4.96771	5.05346	4.49698	4.72399	4.34946	4.64395	5.01925	5.04024	4.84812	4.52442	4.64709	4.62839	4.48081
ENSG00000147854	UHRF2	4.46546	4.853	5.0674	4.73029	3.94826	4.29893	4.85872	3.94819	4.17335	4.14485	4.33847	4.32063	4.43061	4.52031	4.1999	4.26554	4.1341	4.43422	4.43463	4.46395	4.784
ENSG00000162231	NXF1	4.46546	4.22792	4.45986	4.45719	4.14817	3.72702	4.07599	3.69674	3.49899	3.1831	3.49183	3.73156	3.59423	3.75357	3.67131	3.45624	3.43621	3.21331	3.46117	3.50605	3.36575
ENSG00000084623	EIF3I	4.46256	5.20687	4.37919	4.60396	4.18056	4.42837	4.71586	5.46769	5.35436	5.31691	5.19343	5.03664	5.49378	5.30539	5.34755	5.10632	5.36029	5.24876	4.96477	5.29669	5.12876
ENSG00000111540	RAB5B	4.46256	3.83592	4.42456	4.43388	4.81948	4.34456	4.3226	4.23537	3.80649	4.27632	3.88683	4.02605	4.01091	3.85708	4.21845	3.94741	4.16858	4.1079	4.39058	3.89979	3.65216
ENSG00000143614	GATAD2B	4.46256	2.8483	4.30025	4.10948	4.28553	3.99443	3.80793	3.15202	2.98182	2.94926	2.79283	3.51259	2.36365	2.76207	3.12641	3.22435	2.72418	2.63257	2.57762	2.56709	2.20176
ENSG00000166265	CYYR1	4.46256	3.73131	5.3043	4.92346	5.09395	4.93247	5.12638	2.14626	2.10392	2.47177	2.25968	2.89614	1.99077	1.63173	2.6407	2.60824	2.54831	2.70827	2.60306	0.642004	1.83981
ENSG00000088280	ASAP3	4.45965	4.75432	4.44232	4.55725	3.99999	4.11852	4.59595	1.47378	1.82111	2.51277	2.1283	2.00235	1.57795	0.967125	2.16038	2.08347	2.07777	2.18511	2.38761	1.14875	0.914795
ENSG00000133639	BTG1	4.45965	4.75122	5.15795	5.22672	5.14736	5.17045	4.97897	3.29422	2.74081	2.81001	2.69702	2.53006	2.40015	2.09136	3.20556	3.55755	2.92384	3.3173	3.83174	2.85715	3.22498
ENSG00000141556	TBCD	4.45965	3.85625	4.36994	4.28339	4.52631	4.10183	4.03905	4.27888	3.82035	3.65027	3.399	3.64675	3.56417	3.75357	4.14419	4.13691	4.17909	3.99379	3.65072	3.92674	3.55066
ENSG00000150961	SEC24D	4.45965	4.10224	4.04142	4.46457	3.86303	3.8353	4.28891	5.07117	5.02201	5.15406	4.72183	5.0565	5.0755	4.95606	4.9833	4.69578	5.15493	4.90307	4.83929	4.86785	4.7333
ENSG00000159377	PSMB4	4.45965	5.05685	4.02581	4.77402	4.16122	4.4239	4.53092	5.45244	5.15918	5.18574	5.12693	5.14265	5.38442	5.14758	5.27316	5.07764	5.13763	4.99208	5.03538	5.32082	5.09838
ENSG00000138434	SSFA2	4.45673	5.14978	5.48649	5.43646	5.35882	5.27958	5.70877	5.29997	5.48722	6.0824	4.9361	4.92463	4.84043	4.91135	5.75977	5.91286	5.7619	5.8068	6.10219	5.13892	5.75099
ENSG00000154553	PDLIM3	4.45673	5.45936	4.15346	4.2886	3.27507	4.15537	4.67932	0.199669	0.578155	1.42601	1.55656	1.98403	0.780739	1.28836	1.0945	0.67029	0.938191	1.07073	0.509476	-0.155985	0.462981
ENSG00000196876	SCN8A	4.45673	3.21954	4.85846	4.29171	4.38616	4.42054	3.87059	2.74707	2.94012	3.32028	3.23304	3.39272	3.06148	2.94534	2.38336	1.99914	3.35442	2.83694	3.21534	2.99822	2.95346
ENSG00000073614	KDM5A	4.45381	4.50399	4.42456	4.4197	4.61192	4.56247	4.5562	4.11837	4.02966	4.07965	4.03175	3.83228	3.9811	4.09651	4.22108	4.08672	4.27413	4.50598	4.32521	4.30139	4.29734
ENSG00000088888	MAVS	4.45381	4.25661	3.5238	4.08574	4.54881	4.3575	4.20108	5.30182	4.72084	5.07871	4.64197	4.60165	4.62519	4.77572	5.39403	5.0823	5.21704	5.15075	5.26536	4.82997	4.79595
ENSG00000117335	CD46	4.45381	4.76971	5.61599	5.16689	4.78829	5.10218	5.21252	4.19848	4.26402	4.77416	4.71352	4.83803	4.44281	4.34371	4.37364	4.39793	4.16289	4.4738	5.10963	4.49909	4.7789
ENSG00000160310	PRMT2	4.45381	4.78191	4.24399	4.55811	4.54135	4.52749	4.60861	3.82793	3.32847	3.67556	3.44239	3.00916	3.42546	3.47693	4.10272	3.81577	3.97715	4.03627	3.96523	3.66032	3.63452
ENSG00000123349	PFDN5	4.45089	5.57296	4.37611	4.79906	4.69273	4.6991	5.0657	4.34574	4.08172	3.94884	3.99793	3.49653	4.26787	4.13397	4.31577	4.30918	4.27865	4.19928	4.29967	4.35087	4.24705
ENSG00000169184	MN1	4.45089	3.19922	4.08729	3.89813	4.79249	4.22637	4.18708	-0.295962	-0.649079	-0.237356	1.06928	0.514192	0.111866	0.56243	0.0567238	0.502223	-0.261541	-0.281629	0.203434	-0.613533	-0.990105
ENSG00000184432	COPB2	4.45089	5.15272	4.54997	4.77699	4.3778	4.60058	4.69523	5.38627	5.51541	5.44658	5.39137	5.43084	5.81728	5.52135	5.31161	5.3034	5.38668	5.57572	5.36095	5.62336	5.57556
ENSG00000157637	SLC38A10	4.44795	5.47447	4.57701	4.49643	4.41094	4.56957	5.06263	4.22604	4.15767	4.08041	4.54344	3.86519	4.30577	4.62599	4.36237	4.42976	4.2188	4.54004	4.24366	4.47373	4.53799
ENSG00000181555	SETD2	4.44795	4.16761	4.85625	4.67329	4.77138	4.62317	4.39989	3.82382	3.88624	3.9994	3.70909	3.98288	3.67837	3.82212	3.97223	3.95251	3.91951	3.97322	3.89811	3.83298	3.80189
ENSG00000067167	TRAM1	4.44502	4.06779	5.32359	4.86539	4.7304	4.90789	5.05108	3.87346	4.47437	4.16571	4.61434	4.70454	4.29127	4.28802	3.82615	4.17148	3.48783	3.76653	4.11972	3.96364	4.59838
ENSG00000103222	ABCC1	4.44502	2.90794	3.87707	3.69816	3.6343	3.55789	3.70165	4.56387	4.54098	4.1778	4.43072	4.89061	4.27061	4.64125	4.3219	4.45804	4.4196	4.32484	4.13832	4.48988	3.96602
ENSG00000116688	MFN2	4.44502	4.49198	4.05303	4.55552	4.71722	4.19262	4.17861	4.95314	4.82455	4.85122	4.84583	4.87081	5.03803	4.84983	4.80418	4.63103	4.95122	4.70665	4.48638	4.92807	4.71625
ENSG00000135048	TMEM2	4.44502	4.3332	5.07311	4.78512	4.33528	4.65498	4.59912	3.85643	3.88331	3.75079	3.72054	3.87019	3.77573	3.7293	4.02735	3.861	3.85343	3.58867	3.96155	3.71906	3.89977
ENSG00000138449	SLC40A1	4.44502	4.47047	5.74201	4.97735	4.89948	5.10218	5.06646	1.34754	1.59617	1.27002	3.14462	2.90103	2.81494	1.76903	1.63381	1.75454	1.22076	0.750955	1.71155	1.08638	0.200674
ENSG00000168003	SLC3A2	4.44502	5.28447	4.97893	5.05275	4.49059	4.66826	4.48016	4.78913	4.62847	4.55072	4.50242	4.15037	4.5079	5.06311	4.2897	4.0424	4.44326	4.2753	4.24467	4.77796	4.61319
ENSG00000112473	SLC39A7	4.44207	4.91454	4.67288	4.67806	4.2885	4.40021	4.71293	4.61182	4.53912	4.13614	4.57646	4.23994	4.91309	4.83758	4.50568	4.75659	4.42028	4.51444	4.54128	4.79431	4.80027
ENSG00000175130	MARCKSL1	4.44207	3.57887	4.38226	4.00197	4.20595	4.17279	4.31875	4.71381	4.16493	4.38212	4.04836	4.21463	3.87055	4.18022	4.8033	5.2637	4.55484	4.54418	4.70183	4.50466	4.26956
ENSG00000101439	CST3	4.43912	4.635	3.90295	4.9348	4.1449	4.00045	4.38034	4.17038	3.34773	4.12369	3.57446	3.53164	3.84577	4.0822	4.35101	4.27046	4.49723	4.42078	4.24669	4.30687	4.01207
ENSG00000111275	ALDH2	4.43912	4.19637	4.7051	4.83439	4.30622	4.76063	4.64696	2.63639	2.67793	3.11817	2.93364	2.74114	2.51185	2.13513	3.13898	3.29839	2.83872	2.87193	3.1532	2.23466	2.22766
ENSG00000168298	HIST1H1E	4.43912	5.69206	6.06023	5.52474	4.75427	4.81454	5.16974	4.82459	5.2278	5.04417	5.09169	5.16721	5.13446	5.0844	4.29345	4.73245	4.74364	4.3634	4.1142	5.0483	4.78182
ENSG00000013441	CLK1	4.43617	3.89045	5.06549	3.21992	4.09139	4.24928	3.48073	2.83358	3.18589	3.43611	3.30395	3.25816	2.41608	3.41233	3.04267	3.03327	3.03302	3.31367	3.95292	3.17046	3.66169
ENSG00000144674	GOLGA4	4.43617	4.14063	4.7438	4.78364	4.45661	4.52645	4.54197	4.20799	4.5777	4.72704	4.75562	4.88692	4.65318	4.42025	4.38717	4.15828	4.2188	4.65737	4.34937	4.24207	4.30749
ENSG00000175115	PACS1	4.43617	3.27668	3.6866	3.6966	4.11505	3.91706	3.5719	3.44525	3.08236	3.38305	3.01367	3.80645	3.00467	3.44251	3.53318	3.50013	3.52885	3.46864	3.28673	3.18542	2.84749
ENSG00000100888	CHD8	4.4332	4.47424	4.27073	4.35762	4.5587	4.37728	4.26645	4.78384	4.66902	4.61122	4.40772	4.52769	4.52039	4.46075	4.72533	4.58509	4.82206	4.86678	4.77988	4.66477	4.49643
ENSG00000276293	PIP4K2B	4.4332	4.46859	4.14626	4.24318	4.4082	4.62512	4.44058	4.14255	4.16854	3.94219	4.14732	4.08095	4.18894	4.0822	4.20987	4.35076	4.10218	4.1861	4.14916	4.05333	4.13633
ENSG00000153179	RASSF3	4.43023	4.30496	4.18544	3.95295	4.34959	3.96705	4.3136	3.62164	3.72207	4.0026	3.88683	4.14625	3.66009	3.79801	3.8079	4.04048	3.68898	3.46646	3.20187	3.59611	3.90111
ENSG00000184840	TMED9	4.43023	4.71828	4.29374	4.34768	4.10158	4.14591	4.56055	4.82922	4.62409	4.40287	4.90861	4.71569	4.8997	4.87632	4.659	5.03207	4.35549	4.55498	4.39423	4.73151	4.78364
ENSG00000139083	ETV6	4.42726	3.27668	3.93257	3.80088	4.26151	3.75753	3.78022	3.47968	3.24188	3.43255	2.95142	3.35401	2.63946	3.08579	3.49349	3.3191	3.41858	3.24416	3.15212	3.11634	3.07851
ENSG00000174282	ZBTB4	4.42726	4.01192	4.86943	4.6693	4.63781	4.76946	4.56272	3.57586	3.48746	4.005	3.86355	3.75876	3.58281	3.63772	4.02585	3.85774	3.81145	3.56342	3.77622	3.59685	3.27345
ENSG00000112977	DAP	4.42428	2.92454	4.25742	3.52892	4.44599	3.74325	3.90521	4.57494	4.0029	4.21278	3.77347	4.94845	3.33827	3.82785	4.21581	4.65628	3.81974	3.18974	2.59674	3.53592	2.65733
ENSG00000133026	MYH10	4.42428	4.63079	4.92311	4.7203	4.90336	4.85659	5.21529	5.12404	5.04318	4.70067	4.97443	4.47947	4.4496	4.44344	5.67288	5.49717	5.06453	5.5883	5.17284	4.42709	4.64397
ENSG00000118503	TNFAIP3	4.42129	5.45794	5.76689	4.08454	4.63781	3.26498	4.95604	-1.02697	0.121439	-0.0399978	2.16228	2.86644	1.35644	1.16107	-0.131721	0.192774	-0.488312	-0.60906	-0.153209	-0.66984	-0.735386
ENSG00000183722	LHFPL6	4.42129	4.46197	4.12809	4.14781	4.12173	4.30501	4.54965	1.45793	1.1942	1.27002	1.87988	2.18185	1.56372	1.62297	1.5651	1.45408	1.04809	0.841153	1.49086	1.40533	1.19412
ENSG00000267519	AC020916.1	4.4183	4.17919	5.14355	3.27764	3.97066	4.02573	3.58264	0.99883	1.42131	1.23778	1.79184	0.970137	1.16704	1.78874	0.904721	0.775434	1.71865	1.54547	1.75758	1.57241	1.89473
ENSG00000025800	KPNA6	4.4153	4.52773	4.37611	4.65244	4.93028	4.43171	4.69127	5.00179	4.95171	5.18257	5.24119	5.32746	5.25117	5.0011	5.00177	4.82832	5.06889	4.86678	4.88569	5.18579	5.02428
ENSG00000106261	ZKSCAN1	4.4153	3.94027	4.02188	4.25174	4.58555	4.6222	4.42038	3.64283	3.52555	3.52451	3.36093	3.22734	3.2477	3.49384	3.93347	4.00358	3.77035	4.03112	3.75652	3.4066	3.24731
ENSG00000154845	PPP4R1	4.4153	4.97621	4.50561	4.80924	4.25848	4.34101	4.58638	4.82098	5.03594	4.77416	5.06785	4.99722	5.16866	5.08997	4.72348	4.82108	4.5298	4.71218	4.55275	4.97014	5.02766
ENSG00000165102	HGSNAT	4.4153	3.29382	4.28064	4.10712	4.15797	4.21348	3.91713	3.46257	2.65406	3.28522	3.08466	3.00463	3.25325	3.25403	3.66843	3.64213	3.74446	3.4456	3.83577	3.48687	3.19357
ENSG00000075151	EIF4G3	4.41229	3.9858	4.24061	4.07854	4.26151	4.05781	3.98506	4.44492	4.42786	4.27036	4.08103	4.37613	4.10727	4.29492	4.49322	4.34145	4.58979	4.59741	4.40962	4.21122	3.95572
ENSG00000110700	RPS13	4.41229	5.51477	4.86286	4.89027	5.06648	5.31138	5.52398	4.94226	5.22895	4.89193	5.25879	5.13436	5.19053	5.01581	4.8164	5.13669	4.97414	5.00902	5.09402	5.41117	5.38422
ENSG00000113013	HSPA9	4.41229	5.18178	4.49997	4.73105	4.0429	4.37265	4.46399	5.88894	6.14411	5.8099	6.14742	6.27262	6.39633	6.12382	5.59417	5.60873	5.49351	5.47448	5.18526	6.04468	5.95354
ENSG00000056097	ZFR	4.40928	4.37104	4.55813	4.68361	4.34959	4.50016	4.18848	4.60704	4.65191	4.60596	4.44271	4.64165	4.60143	4.49054	4.71418	4.42976	4.54363	4.539	4.42887	4.44211	4.47046
ENSG00000106397	PLOD3	4.40928	4.50491	4.17486	4.49643	3.94826	3.83361	3.94735	4.72102	4.54376	4.55345	4.47625	4.5713	4.62903	4.82618	4.89426	4.63294	4.67905	4.49906	4.44522	4.61593	4.38865
ENSG00000114391	RPL24	4.40928	6.24082	4.54723	4.86957	4.45661	5.03051	5.19933	4.97234	4.90406	4.72122	4.89489	4.40912	4.96951	4.91046	4.89096	4.97099	4.95451	5.11086	4.98668	5.20671	5.10422
ENSG00000151348	EXT2	4.40928	5.05747	4.37919	4.65969	4.34102	4.24549	4.72364	4.25615	4.13444	4.44525	4.16571	4.2874	4.3047	3.95801	4.66046	4.71333	4.57579	4.30851	4.55764	4.40682	4.40055
ENSG00000253352	TUG1	4.40928	3.12934	4.68536	4.15809	4.39446	4.43948	4.07599	4.28937	4.41777	4.42093	4.19958	4.51818	4.05418	4.28524	4.24647	4.38137	4.14898	4.17947	4.47781	4.25819	4.26174
ENSG00000005007	UPF1	4.40626	4.04646	4.09105	4.06889	3.86303	3.81496	3.53921	4.59138	4.57589	4.37966	4.38435	4.46137	4.5626	4.53206	4.5019	4.53424	4.49399	4.41797	4.3021	4.53689	4.36064
ENSG00000113580	NR3C1	4.40626	4.50123	4.81822	4.63209	4.73913	4.93483	4.56488	2.57891	2.75371	2.6518	3.28724	3.48355	3.56059	3.60363	2.46992	2.46126	2.14528	2.4058	2.20447	3.12464	2.92472
ENSG00000141867	BRD4	4.40626	3.18551	3.94922	3.45488	4.62138	3.55176	3.36612	3.84022	3.6254	3.52785	3.40804	4.36909	3.1735	3.629	3.55732	3.73631	3.67649	3.26311	3.18933	3.35198	2.8641
ENSG00000147604	RPL7	4.40626	5.65233	4.62703	5.23861	5.00632	5.01277	5.24937	5.22857	5.0569	5.19172	4.9249	4.64603	5.18269	5.00448	4.90206	4.96595	5.10494	5.36997	5.19104	5.07424	5.08811
ENSG00000159592	GPBP1L1	4.40626	4.74188	4.46566	4.85279	4.84395	4.63675	4.51868	4.10571	4.05332	4.20237	4.0107	4.15037	4.03368	3.94841	4.27838	4.11067	4.11571	4.22592	4.25324	3.96364	4.16454
ENSG00000166986	MARS	4.40626	4.12396	3.10783	4.1212	3.15634	2.99066	3.2416	4.89889	4.83824	5.01434	4.57532	4.79533	4.84228	4.7668	4.76822	4.47161	5.07106	4.75475	4.48125	4.91168	4.81956
ENSG00000091490	SEL1L3	4.40324	4.07524	3.83288	3.94901	3.18216	3.95006	3.58691	4.3798	4.08044	4.54962	3.97985	4.11081	3.90905	3.81733	4.5382	4.33051	4.52601	4.27093	4.97211	3.55984	3.93949
ENSG00000233927	RPS28	4.40324	4.71907	4.54175	3.9238	3.80605	3.80297	4.42158	4.74245	5.04121	3.14739	4.23122	3.31056	3.43526	4.33435	4.42985	4.8956	3.99281	4.48568	3.41524	3.39292	4.01765
ENSG00000118200	CAMSAP2	4.40021	3.92248	5.05591	4.61975	4.55129	4.72929	4.77508	3.78092	3.90515	3.86601	4.0107	4.33335	3.78803	4.04745	3.77964	3.9122	3.25402	3.69297	3.67341	3.80871	3.90178
ENSG00000144283	PKP4	4.40021	5.20913	4.10969	4.50719	4.2885	3.99141	4.32516	3.53362	3.70225	3.93801	3.72778	3.62918	3.83396	3.62022	3.74899	3.3825	4.07301	3.6967	3.39991	3.33955	3.19685
ENSG00000166783	MARF1	4.40021	2.71788	3.96977	3.65687	5.32735	3.92498	3.56326	3.05699	2.73432	2.98369	2.71794	3.03609	2.36159	2.77399	2.9989	3.01972	2.92384	3.08429	2.91883	2.57165	2.53648
ENSG00000143442	POGZ	4.39717	3.49058	4.78382	4.24318	4.41366	4.22123	3.89835	3.66256	3.74485	3.74889	3.33543	3.64384	3.23541	3.36717	3.73618	3.605	3.95757	3.76742	3.71993	3.4252	3.24626
ENSG00000033100	CHPF2	4.39413	3.99631	3.47287	4.24853	3.50217	3.89301	3.97857	4.35932	4.24474	4.41734	4.25932	4.09169	4.53049	4.46932	4.67731	4.61759	4.8466	4.83336	4.65281	4.53534	4.418
ENSG00000107372	ZFAND5	4.39108	5.68436	5.53004	4.55552	5.0543	4.48416	4.77508	4.14172	4.16372	4.165	3.95979	3.84249	3.85676	3.71185	4.39999	4.64181	4.3426	4.25903	4.42129	4.24635	4.79991
ENSG00000134308	YWHAQ	4.39108	4.45246	4.66534	4.63291	3.96323	4.21607	4.28234	5.31325	5.19212	5.37674	5.33729	5.41297	5.17598	5.36142	5.20406	5.25711	5.22876	5.23699	5.07682	5.17409	5.55908
ENSG00000071967	CYBRD1	4.38802	4.6027	5.56017	5.14005	5.40341	5.65997	5.51952	1.80983	1.61749	2.40317	3.19325	3.47701	2.43965	2.10714	2.08443	1.91796	1.91323	2.30455	3.02615	1.99312	2.30065
ENSG00000074054	CLASP1	4.38802	4.02481	4.69279	4.38608	4.72383	4.50863	4.62324	3.93393	3.79562	4.03579	3.69649	3.87516	3.83544	3.87747	3.97768	3.98874	4.26658	4.04724	4.02291	3.89434	3.72518
ENSG00000085224	ATRX	4.38802	3.74383	4.8825	4.56414	4.88776	4.80855	4.88237	3.82279	3.77046	4.07586	3.92872	3.86519	3.72228	3.85615	4.05045	3.88576	3.87447	4.49747	4.25374	3.90462	4.22364
ENSG00000142303	ADAMTS10	4.38802	3.86917	4.38532	4.17956	3.68936	4.12816	3.61018	0.212324	0.101401	0.179569	0.683255	-0.578067	-0.441654	-0.318926	1.04786	1.14005	0.794201	2.56901	1.05696	-0.040121	-0.356233
ENSG00000154134	ROBO3	4.38802	3.4182	3.85956	3.9358	2.86103	3.5228	3.46689	2.44324	2.06306	2.52172	2.40611	2.09062	1.90306	1.96193	2.31361	2.50639	3.32269	3.20419	2.96982	1.89221	1.26253
ENSG00000180398	MCFD2	4.38802	4.7628	4.77216	4.82653	4.3778	4.39565	4.8719	5.27304	5.64435	5.86349	5.3664	5.68801	5.45286	5.6107	5.25852	5.34902	5.21586	4.97801	4.87855	5.48031	5.65743
ENSG00000086061	DNAJA1	4.38496	5.72993	5.00902	5.13486	4.48541	4.79737	4.93943	5.1891	5.26374	4.96268	5.4111	5.44346	5.46775	5.37191	5.03391	5.08277	4.75124	4.79914	4.76869	5.22709	5.25087
ENSG00000090060	PAPOLA	4.38496	4.14182	4.84294	4.52848	4.89558	4.62512	4.50746	4.75601	4.92844	4.64183	4.99	5.35178	4.84301	4.81565	4.70387	4.64749	4.32524	4.31337	4.2472	4.57828	4.64317
ENSG00000136279	DBNL	4.38496	4.63668	3.83288	4.07493	4.11169	4.10323	4.05147	4.65708	4.33867	4.54853	4.50903	4.20873	4.61444	4.70279	4.62267	4.46663	4.56843	4.45305	4.49829	4.5608	4.49554
ENSG00000138757	G3BP2	4.38496	4.68943	5.10876	4.93745	4.74996	4.93326	5.22833	4.92315	5.15797	4.98389	5.29857	5.39748	5.36583	5.06594	4.85034	5.01996	4.69435	5.03461	5.1447	5.10078	5.39996
ENSG00000173020	GRK2	4.38496	4.45722	4.10969	4.24425	4.55129	4.18208	4.08659	3.71908	3.67878	3.81776	3.73087	3.83484	3.98978	3.6689	3.78409	3.81016	3.88537	3.84325	3.9461	3.7039	3.5498
ENSG00000156599	ZDHHC5	4.38189	4.12874	4.26076	4.44605	4.26151	3.98081	4.29414	4.68288	4.55854	4.59699	4.52812	4.89552	4.61918	4.69289	4.65171	4.55989	4.41003	3.98163	4.26224	4.59181	4.2866
ENSG00000162367	TAL1	4.38189	4.41085	4.57969	4.45163	4.60239	4.54097	4.30844	3.70684	3.63937	3.92879	3.65912	3.73704	3.69886	3.46718	3.6607	3.68202	3.54644	3.85246	3.84379	3.59536	3.53259
ENSG00000105576	TNPO2	4.37881	2.75857	3.5238	3.42681	3.84698	3.48469	3.33852	4.11332	3.96736	3.86777	4.04588	4.26102	3.79032	4.16296	3.89775	3.91952	3.68445	3.27436	3.12054	3.69348	3.24731
ENSG00000107957	SH3PXD2A	4.37881	3.78985	3.08541	3.18906	4.03583	3.82517	4.00435	2.27248	1.57453	1.74936	1.2118	2.3124	0.91011	1.44562	2.40664	2.78805	2.12201	1.79502	1.87186	1.16896	1.1406
ENSG00000137962	ARHGAP29	4.37881	3.53089	5.28802	4.92747	4.76925	5.30289	5.4573	5.48017	5.7825	5.78757	5.95968	6.03303	5.62486	5.74262	5.84407	5.77414	5.6712	5.8305	5.70926	5.79391	6.34968
ENSG00000175309	PHYKPL	4.37881	3.75625	3.74022	3.49328	3.39032	3.66779	3.11422	3.05875	3.09001	2.97067	2.85649	2.69683	2.94416	2.93299	3.00654	2.93766	3.31392	2.97667	3.00603	2.85466	2.60724
ENSG00000077549	CAPZB	4.37573	3.33165	4.30025	3.70908	4.23708	3.82517	3.8405	4.48066	4.03495	3.96041	4.13571	4.71569	3.52889	4.27968	4.13376	4.46448	3.8187	3.17913	2.90611	3.7115	2.82222
ENSG00000105835	NAMPT	4.37573	6.15989	4.82049	4.33162	5.81174	4.21348	4.93274	4.10062	4.48505	4.52868	4.14578	4.30964	4.09248	4.0838	3.93667	3.91011	4.1115	4.41288	4.73744	3.9497	4.34445
ENSG00000109686	SH3D19	4.37573	3.01774	4.03364	3.91977	3.82666	4.48093	4.06684	4.21822	3.90948	4.33274	4.01747	4.08526	3.70374	3.63118	4.52709	4.28753	4.48164	4.36281	4.54989	4.09459	4.25336
ENSG00000130309	COLGALT1	4.37573	4.16993	3.32757	3.66651	3.3736	3.28236	3.06302	5.76959	5.53235	5.19031	4.93073	5.06306	5.04669	5.04806	5.61332	5.39812	5.0641	4.85183	4.97942	4.99638	5.11813
ENSG00000178252	WDR6	4.37573	4.37406	3.96159	3.81105	3.91785	4.14997	4.27044	4.40206	3.96459	3.83851	4.05824	3.91922	4.16792	4.01853	4.47681	4.45372	4.38092	4.1065	4.26175	4.36845	4.04704
ENSG00000099991	CABIN1	4.37264	3.82122	3.62055	4.00071	3.98906	3.64877	3.83512	3.61451	3.79718	3.88349	3.62185	3.90955	3.60122	3.6942	3.93427	4.03568	4.25363	4.11626	4.11143	3.85185	3.47609
ENSG00000105438	KDELR1	4.37264	3.52001	4.20638	4.38706	4.3324	4.19656	4.06225	4.82768	4.41473	4.57512	4.13181	4.71152	4.46548	4.53323	4.7207	4.46019	4.64156	4.18146	4.46573	4.48102	4.0232
ENSG00000108848	LUC7L3	4.37264	3.64546	4.59034	4.02213	3.51746	4.04913	3.52147	3.72572	3.91809	3.99779	3.69333	3.81166	3.51878	3.87655	3.69515	3.82471	3.79683	4.16005	4.09472	3.608	3.87062
ENSG00000134686	PHC2	4.37264	5.00186	3.73543	4.35465	4.00361	3.95161	4.29284	4.66343	4.39942	4.26437	3.98935	4.05046	4.21421	4.12314	4.54714	4.71814	4.44259	4.30486	4.26673	4.48666	4.3405
ENSG00000163682	RPL9	4.37264	6.1033	4.88683	4.85208	5.13749	5.53761	5.51784	4.81113	4.73229	4.59328	5.18068	4.64894	5.10957	4.6183	4.94286	4.77745	4.50945	5.43324	5.27652	5.22178	5.17802
ENSG00000179295	PTPN11	4.37264	4.26097	4.16776	4.17056	4.22781	4.39565	4.4721	5.01495	4.9958	5.06576	5.02903	5.13644	5.14972	5.10695	4.93487	5.02965	4.85872	4.94514	4.64633	4.99949	5.0745
ENSG00000140750	ARHGAP17	4.36954	2.57799	4.01398	3.43058	3.87495	4.03162	3.45526	3.82588	3.62365	3.67857	3.60173	4.27239	3.38455	3.62242	3.81139	3.70398	3.54144	3.54185	3.46465	3.41085	2.84331
ENSG00000144224	UBXN4	4.36954	3.86057	4.63478	4.24639	4.21223	4.25054	4.01231	3.93011	3.71879	3.95959	4.15961	4.37964	3.93624	3.99666	4.06297	3.95047	3.62303	4.01257	3.90003	3.89737	3.94666
ENSG00000161940	BCL6B	4.36954	4.96087	4.56355	4.76209	3.66209	4.74728	5.03241	5.35736	5.22549	5.2022	4.55801	4.43126	4.09743	4.43784	5.44469	5.34747	5.16676	5.07091	5.55122	4.86569	4.8677
ENSG00000168615	ADAM9	4.36954	4.82601	4.61404	4.3296	4.39722	4.68889	4.82747	6.02585	6.23256	6.36302	6.34277	6.29369	6.55571	6.45698	6.15583	5.96456	5.76056	5.8053	5.67125	6.07912	6.37223
ENSG00000100991	TRPC4AP	4.36644	4.39704	4.4126	4.22916	4.06388	4.10463	4.16725	4.57249	4.36202	4.43225	4.40062	4.51818	4.66988	4.67129	4.76236	4.80424	4.64913	4.63329	4.50548	4.67576	4.61032
ENSG00000130811	EIF3G	4.36644	4.95953	3.84628	4.72722	4.19013	4.3842	4.39989	4.62667	4.56404	4.39558	4.17331	3.68412	4.50837	4.54428	4.45576	4.21716	4.64913	4.5829	4.29821	4.4342	4.14598
ENSG00000164171	ITGA2	4.36333	3.88904	3.88575	3.44931	4.03583	4.04186	4.26111	5.7253	5.72391	6.01899	5.24227	5.80938	5.4912	5.30163	5.61956	5.27881	5.67406	5.51193	5.45388	5.4016	5.58059
ENSG00000171105	INSR	4.36333	4.29329	4.36994	5.51143	4.11505	4.53165	4.28628	3.3193	2.63327	2.68207	2.59891	2.44556	2.1325	2.3652	4.15866	3.5209	3.27225	3.8187	3.81211	1.81482	1.90011
ENSG00000241973	PI4KA	4.36333	3.56834	3.63091	3.78328	3.91014	3.4696	3.56326	3.85442	3.37303	3.71025	3.55946	3.92643	3.739	3.70875	3.82529	3.62688	3.92912	3.67516	3.48873	3.6373	3.46616
ENSG00000140464	PML	4.36022	2.97588	3.70142	3.98923	3.44466	3.75753	3.48073	3.47706	3.24645	3.50319	2.94256	3.52215	2.84614	2.66303	3.4324	3.46484	3.45495	3.20941	3.32067	2.93473	2.57061
ENSG00000179335	CLK3	4.36022	3.78683	4.07216	3.52892	4.2524	3.58616	3.23072	3.67405	3.57725	3.66853	3.28304	3.37876	3.53437	3.54109	3.50001	3.4677	3.80416	3.6408	3.51911	3.56366	3.18589
ENSG00000116044	NFE2L2	4.35709	3.69145	4.71974	4.15923	4.60716	4.4777	4.27574	3.17967	2.86486	3.2371	3.12752	3.89981	2.72188	3.16484	2.75217	2.81745	2.33648	2.22173	2.4112	2.43983	2.43083
ENSG00000141258	SGSM2	4.35709	4.17803	4.32279	3.9358	3.69833	4.1834	3.78209	3.27172	3.05657	3.11521	3.05372	2.81555	2.84761	2.82832	3.79913	3.64718	3.95098	3.81357	3.91661	3.23609	3.1457
ENSG00000170017	ALCAM	4.35709	4.03758	4.4305	4.14437	3.72053	4.29893	4.48474	3.66602	4.59393	3.51445	4.81509	5.19236	5.89837	4.71005	3.57181	3.99865	2.87099	3.12353	3.4322	5.04338	4.70016
ENSG00000065427	KARS	4.35396	4.94401	3.97385	4.35067	3.89851	4.10881	4.10308	5.48409	5.35806	5.35342	5.16514	5.27851	5.47394	5.33284	5.2291	5.08417	5.30822	5.09297	5.02894	5.32375	5.1907
ENSG00000108883	EFTUD2	4.35396	4.09737	3.74976	4.11769	3.6202	3.56805	3.53921	5.08414	4.70183	4.77977	4.78368	5.16213	4.80495	4.953	4.90656	4.83773	4.85822	4.55652	4.19379	4.84134	4.44722
ENSG00000133612	AGAP3	4.35396	4.1347	3.76865	3.61271	3.28106	3.53321	3.548	4.47739	4.04809	3.93801	3.48452	3.52215	3.70455	3.94314	4.35819	4.50744	4.26506	4.2285	4.05898	3.83361	3.60024
ENSG00000168092	PAFAH1B2	4.35396	5.0116	5.02679	5.06434	4.44599	5.04732	4.94942	5.12278	5.13105	5.24236	5.39104	5.23075	5.39426	5.19562	5.10326	5.03159	4.89398	5.04268	5.11572	5.22805	5.54884
ENSG00000173575	CHD2	4.35396	4.07027	4.99706	4.43576	4.69048	4.56957	4.44058	4.14996	3.86114	4.08268	3.52188	3.63212	3.59248	3.93078	4.0659	3.94126	4.13991	4.09385	3.93049	3.80484	3.59444
ENSG00000101337	TM9SF4	4.35083	3.85047	4.31959	4.71025	4.29739	4.02426	4.18426	4.10486	4.0029	4.11262	3.97465	4.16873	3.9931	3.97875	4.16003	4.02796	4.1341	3.97552	3.93488	3.90642	3.62237
ENSG00000131236	CAP1	4.35083	5.19438	4.02188	4.36059	4.42181	3.93129	4.0986	5.58486	5.77383	5.82082	5.54182	5.69718	5.63872	5.92756	5.51415	5.3002	5.18612	5.00189	4.93347	5.46956	5.38685
ENSG00000164889	SLC4A2	4.35083	4.29116	3.83736	4.02961	3.48152	3.71792	3.63514	4.28414	4.30183	3.76594	4.3036	4.00121	4.43404	4.43721	3.94941	4.36538	3.76821	3.69948	3.76006	4.25394	4.03853
ENSG00000003756	RBM5	4.34769	4.3821	4.41859	4.21062	4.18376	4.28421	3.72509	3.87844	3.90659	3.98409	3.77547	3.65546	3.77804	4.04499	4.29968	4.00652	4.28764	4.3176	4.44258	3.94208	4.08413
ENSG00000067369	TP53BP1	4.34769	4.4255	4.34183	4.18404	4.08456	4.0213	4.05302	4.02283	3.55716	3.58342	3.42595	3.46054	3.66176	3.59805	4.17299	4.07647	4.24673	4.21234	4.03815	3.80936	3.59112
ENSG00000090905	TNRC6A	4.34769	3.17167	4.23042	3.78328	4.17414	4.07358	3.64542	4.16143	4.083	3.9195	3.94921	4.24187	3.86911	4.10832	4.03783	3.86966	3.98547	3.9097	3.89038	3.99567	3.92769
ENSG00000142227	EMP3	4.34769	3.07089	3.83288	5.52164	3.02695	3.25495	3.77462	2.93632	2.92595	3.44083	3.19921	3.73704	3.08534	3.01058	2.87079	2.89587	2.91226	2.24734	2.58402	3.18938	2.32484
ENSG00000170471	RALGAPB	4.34769	3.4943	4.28064	4.2378	4.38338	4.28421	3.90692	3.95479	3.89645	4.11484	3.94123	3.89981	3.77496	3.87379	4.09772	3.9143	4.22973	4.28769	4.14916	4.05659	4.0367
ENSG00000183963	SMTN	4.34769	4.35173	3.32757	4.04693	2.99088	3.10113	3.59117	5.92303	5.77778	5.9564	5.32029	5.52967	5.43831	5.69772	5.85384	5.54695	5.8022	5.48286	5.35651	5.63721	5.34901
ENSG00000197136	PCNX3	4.34769	3.27884	3.49573	3.67608	3.59159	3.24991	3.59542	4.55583	4.34081	4.38151	4.14809	4.21659	4.13641	4.36749	4.53715	4.48436	4.60665	4.38605	4.33188	4.41657	4.00273
ENSG00000079332	SAR1A	4.34454	4.50031	4.87816	4.50987	4.45396	4.75708	4.87453	4.35076	4.51943	4.24355	4.69623	4.7295	4.76391	4.60557	4.30403	4.25814	3.979	4.05523	4.33616	4.61188	4.80709
ENSG00000143669	LYST	4.34454	4.26966	5.13447	4.64352	5.20831	4.64829	5.05879	0.984145	1.27692	0.81821	1.77995	1.50779	0.875962	1.44064	1.68424	1.25029	1.3408	1.87275	1.66097	0.58299	1.11307
ENSG00000168906	MAT2A	4.34138	4.28581	4.28393	4.5981	4.67238	4.8171	4.52426	4.49821	4.66988	4.7051	5.0933	5.49855	4.95969	5.29682	4.3689	4.47729	4.54613	4.40267	4.48937	4.94604	4.74568
ENSG00000084774	CAD	4.33821	3.24399	3.30187	3.39625	3.72493	3.25997	3.54142	4.84251	4.99986	4.53367	4.55627	4.84058	4.64771	4.92522	4.52336	4.50952	5.01667	4.57382	4.19744	4.69957	4.25494
ENSG00000105887	MTPN	4.33821	4.60613	4.94404	4.78364	5.29073	4.91108	5.15687	5.3333	5.42106	5.52298	5.4684	5.70978	5.44585	5.3755	5.27063	5.3713	5.12598	5.26421	5.36583	5.3609	5.82354
ENSG00000136869	TLR4	4.33821	4.32489	4.59299	4.38608	4.84395	4.87798	4.93943	4.04775	3.69558	3.28522	5.25378	4.19286	4.94604	4.06614	4.03035	3.5373	2.93342	3.94298	3.87284	4.09564	3.91446
ENSG00000174804	FZD4	4.33821	4.9782	4.96671	5.08664	4.98081	4.95665	5.22697	5.56094	5.60487	5.69511	5.94844	5.92733	5.91458	5.6904	5.77058	5.78591	5.52236	5.75687	5.8217	5.82193	5.84601
ENSG00000198162	MAN1A2	4.33821	4.49012	4.77917	4.38803	4.7478	4.68609	4.66424	3.81762	3.78937	3.77627	3.94478	3.81425	3.92723	3.84677	4.0281	3.77946	3.71477	3.92406	4.11309	3.85808	4.18231
ENSG00000109920	FNBP4	4.33504	3.34198	4.31638	3.91439	3.69385	3.694	3.28431	3.91179	3.8789	3.92289	3.62296	3.76682	3.73741	3.96062	3.89364	3.47765	3.80207	3.9169	3.93363	3.79902	3.64176
ENSG00000117139	KDM5B	4.33504	4.37909	4.1642	4.40922	4.49059	4.45489	4.42277	4.63903	4.26289	4.25634	3.66882	3.85262	3.94312	3.88023	5.07265	4.69273	4.73381	4.98791	4.83056	4.20976	4.13234
ENSG00000143179	UCK2	4.33504	4.64171	2.29211	4.30924	3.73368	3.87348	4.20525	3.75196	3.80029	3.82501	3.77147	3.85262	3.78035	3.79412	3.54162	3.67832	3.65001	3.58667	3.3678	3.9497	3.97687
ENSG00000197603	C5orf42	4.33504	3.18321	4.58236	3.78328	4.16446	4.23914	4.2876	1.99334	2.5433	2.6518	2.79085	2.66843	2.43575	2.56586	2.46992	2.25194	2.43418	3.07717	3.19248	2.5762	2.57902
ENSG00000198952	SMG5	4.33504	4.10102	3.42009	3.74741	3.67579	3.64877	3.34861	5.03646	4.94891	5.08249	5.10128	5.01988	5.25312	5.01665	5.0094	4.85528	4.89202	4.55293	4.77079	5.07825	4.99002
ENSG00000105971	CAV2	4.33187	3.96723	5.20551	4.87927	3.90239	5.21122	5.1446	4.29979	4.54284	5.41208	4.9512	4.80058	4.82634	4.5061	4.42358	4.30599	4.77168	4.51496	4.53634	4.55351	4.95782
ENSG00000111669	TPI1	4.33187	5.96839	4.78614	5.3354	4.06735	4.59364	4.76852	5.97268	6.15327	6.22405	6.10972	5.88476	6.17941	5.93775	5.75206	6.3019	6.0367	5.75576	6.01338	6.21359	6.14322
ENSG00000119707	RBM25	4.33187	3.36649	4.76748	3.96211	3.9595	4.07786	3.81341	3.95855	4.12454	4.14992	4.22976	4.43969	4.09	4.25368	3.9691	3.94536	3.92625	4.15668	4.09023	4.04187	4.17456
ENSG00000169710	FASN	4.33187	3.34198	2.46421	3.03644	2.93123	2.95704	2.69869	5.75831	6.03148	6.08032	5.13434	5.5122	5.57651	5.52194	5.09754	5.4757	5.98972	5.73555	5.86883	5.58553	4.76534
ENSG00000284669	AC092053.3	4.33187	3.85481	4.38226	2.20567	3.71169	3.35457	3.25509	0.273987	-0.71862	-0.107426	-0.338182	0.0338626	-0.167893	-0.0857265	-0.0661329	-0.295417	0.0374725	-0.984818	-0.207452	-0.238743	-0.109318
ENSG00000067048	DDX3Y	4.32868	-3.94033	5.74201	4.79247	-2.82747	5.12576	-5.23007	3.67975	3.93659	3.83582	-4.91453	4.14625	-4.92278	-4.56685	3.91328	4.10334	3.79368	-6.31872	4.10699	-5.51354	-5.36266
ENSG00000126012	KDM5C	4.32868	4.97886	4.28393	4.41113	4.67919	4.10043	4.71683	4.42874	4.35991	4.54249	4.67231	4.00121	4.97422	4.93719	4.5223	4.51918	4.58494	5.11261	4.49617	5.04311	4.83157
ENSG00000171298	GAA	4.32868	3.77468	4.297	3.79942	3.93693	4.07928	3.99312	3.4823	3.17155	2.49696	2.57618	2.52374	2.06338	2.08818	3.89775	4.04048	3.03658	3.48164	3.80047	2.27063	1.89742
ENSG00000171681	ATF7IP	4.32868	3.1077	4.67288	3.87061	4.91303	4.41267	4.49728	4.03089	3.94083	3.87128	3.19175	3.47701	3.25547	3.31511	4.22894	3.85119	3.88438	4.0414	3.8223	3.44024	3.40316
ENSG00000181722	ZBTB20	4.32868	3.52908	4.52241	4.40827	4.64246	4.2096	4.50181	1.50498	1.49228	2.03227	2.18951	1.59488	1.4289	1.27724	1.62192	1.53798	1.95145	2.19303	2.02556	1.37085	1.19849
ENSG00000064393	HIPK2	4.32549	3.31076	3.3899	3.80525	4.21536	3.62561	4.00435	4.79807	4.27971	4.45755	4.03592	4.73362	4.05545	4.5055	4.59354	4.48717	4.64681	4.07539	3.59397	4.13521	3.5438
ENSG00000132549	VPS13B	4.32549	3.76549	4.33551	3.96341	4.72163	4.3147	4.25441	2.86598	2.83786	2.71367	2.64553	2.70803	2.33251	2.81493	3.11938	2.84407	3.27225	3.31851	3.35101	2.91811	2.82222
ENSG00000146950	SHROOM2	4.32549	3.33372	3.5676	3.80525	3.82666	3.93914	3.48073	3.20205	3.12517	2.81912	2.42659	2.70803	2.24603	2.32527	3.49892	3.45624	3.47346	3.62526	3.43839	2.74048	2.79937
ENSG00000158863	FAM160B2	4.32549	2.85985	4.03754	3.59935	3.25087	3.31651	2.96468	2.92291	2.50568	2.86557	2.31016	2.28273	2.26814	2.68844	3.02773	3.06944	3.35869	3.07002	2.85938	2.63839	2.29453
ENSG00000175166	PSMD2	4.32549	4.47047	3.95335	4.12587	4.17092	4.07073	4.04992	6.32213	6.0512	6.26928	6.20802	6.41147	6.34134	6.23575	6.01821	6.19697	6.14228	5.78577	5.32677	6.20028	6.04847
ENSG00000197622	CDC42SE1	4.32549	5.22541	4.68536	4.56414	4.98448	4.63385	4.63256	4.69025	4.36202	4.25299	3.97552	4.18486	4.27607	4.26569	4.53556	4.43415	4.36755	4.35694	4.54087	4.27367	4.31254
ENSG00000104635	SLC39A14	4.32229	4.41673	3.97791	4.74628	2.63664	3.59214	3.61228	4.50401	4.7882	4.52979	4.71248	4.62844	4.88117	4.53906	4.03484	3.89534	4.3633	4.0289	3.86826	4.46803	4.39818
ENSG00000162613	FUBP1	4.32229	4.62826	4.13174	4.35861	3.68936	3.79434	3.98182	4.74626	4.8518	4.62686	4.69095	4.84312	4.59838	4.86801	4.56536	4.52056	4.59945	4.46619	4.39058	4.61372	4.53756
ENSG00000167693	NXN	4.32229	4.15477	4.24736	5.00482	4.16769	4.46689	4.2797	3.98184	3.36884	4.37905	4.14732	4.03942	3.94037	3.9449	4.18112	3.76677	3.83923	3.69297	3.68015	3.18045	3.32734
ENSG00000182149	IST1	4.32229	4.85155	4.56355	4.48377	4.10158	4.49698	4.58531	4.34646	4.0766	4.01692	4.04091	3.9455	4.14061	4.05967	4.24259	4.11067	4.27263	4.30364	4.3021	4.13469	4.22096
ENSG00000104341	LAPTM4B	4.31908	4.21898	4.15346	4.04077	4.12506	4.61535	4.50633	4.24695	3.99884	3.70042	3.93766	4.09169	3.93624	3.81637	4.38189	4.21291	4.01464	4.30912	4.40059	4.06416	4.36405
ENSG00000108861	DUSP3	4.31908	4.60956	4.16063	4.50987	4.0216	4.56754	4.42754	3.85341	3.66006	3.95877	4.22246	4.09169	4.28369	3.83165	4.24453	4.06237	3.94342	3.93592	4.10699	3.96942	3.69069
ENSG00000164190	NIPBL	4.31908	3.38859	4.78614	3.96991	4.75427	4.3865	4.15435	3.37804	3.34134	3.03774	3.45864	3.94313	2.76761	3.30557	3.17605	3.32225	2.6307	3.16308	2.50527	2.91692	2.34667
ENSG00000074695	LMAN1	4.31587	4.67642	5.31237	4.8612	4.34959	4.82813	4.85163	4.71825	5.16824	4.96391	5.10764	5.08687	5.38619	4.91539	4.68209	4.71574	4.62569	4.9634	4.95308	4.94838	5.31644
ENSG00000109475	RPL34	4.31587	5.98266	4.62444	4.80996	5.02428	5.17843	5.30553	4.74626	4.52602	4.59646	4.63484	4.27427	4.73682	4.60613	4.59303	4.66501	4.68757	4.85433	4.75315	4.866	4.91695
ENSG00000119408	NEK6	4.31587	3.4943	3.48435	3.67608	3.55253	3.63337	3.50576	3.05172	3.18351	3.0625	2.90838	3.19982	3.47097	3.28628	3.19088	3.38553	3.31538	2.82339	2.61248	3.46986	3.01548
ENSG00000165915	SLC39A13	4.31587	3.79738	3.74976	3.95689	3.26302	3.62171	3.65766	4.33348	4.09191	4.33147	4.0607	4.01256	4.22216	4.24515	4.26824	4.2273	4.09195	3.90649	4.02879	4.25157	3.95637
ENSG00000214078	CPNE1	4.31587	4.00414	3.73062	3.96472	3.79354	3.16678	3.39564	4.44223	4.11083	4.63771	3.93945	3.51897	4.16557	4.1332	4.5239	4.36844	4.5904	4.35577	3.72428	4.11348	3.92241
ENSG00000101150	TPD52L2	4.31265	4.55197	4.12809	4.30308	4.26755	4.04623	4.12234	5.05458	4.99036	5.3182	5.08848	5.08257	5.06669	4.9046	4.89549	5.04837	4.94128	4.64153	4.45965	4.82774	4.41706
ENSG00000110719	TCIRG1	4.31265	5.01483	4.11707	4.07734	4.01083	3.61388	3.66575	4.15898	3.94786	4.02481	3.88683	3.37173	3.86476	4.04581	4.08407	4.14496	4.38022	4.32784	4.3233	4.00413	3.80548
ENSG00000132153	DHX30	4.31265	4.19979	3.66155	4.12354	3.58676	3.51232	3.76522	4.77106	4.75971	4.59593	4.60987	4.61362	4.87146	4.75332	4.4423	4.45444	4.71948	4.64971	4.31467	4.77137	4.51144
ENSG00000140836	ZFHX3	4.31265	3.38859	2.70878	3.36701	3.58192	3.37091	3.58478	2.82742	2.18232	2.0006	1.79578	2.20577	1.64031	2.36782	2.79869	2.71303	2.76981	2.48756	2.06728	2.23466	1.97846
ENSG00000185630	PBX1	4.31265	3.44337	4.68536	3.75646	4.56607	4.32552	3.91883	1.47378	0.755311	1.42601	1.77597	1.75471	1.06464	1.02144	0.898163	0.899043	1.18912	1.49078	1.77167	0.693129	0.666037
ENSG00000198947	DMD	4.31265	4.04898	3.86834	3.91439	3.98172	4.06643	4.36301	0.28601	0.703081	0.696968	1.19995	2.02044	1.82467	0.323918	-0.0157279	-0.314913	-0.0205331	0.261226	-0.0406013	0.895854	-0.210012
ENSG00000004487	KDM1A	4.30942	4.47517	4.01002	4.80706	4.00361	4.34101	4.50181	5.20858	5.18857	5.09041	4.88798	4.74454	5.13716	5.14873	5.22583	5.17388	5.36631	5.38763	5.04903	5.33988	5.24269
ENSG00000105443	CYTH2	4.30942	3.75161	4.14626	3.2943	3.35102	3.70877	3.62894	4.03534	3.6686	3.30869	3.41703	3.19585	3.18284	3.76953	4.22173	4.35231	3.79893	3.77975	3.71045	3.7669	3.63533
ENSG00000130741	EIF2S3	4.30942	5.19495	4.60092	4.57014	5.082	4.90789	5.08168	4.73589	4.71426	4.81753	5.15098	4.99494	5.32686	5.09986	4.61018	4.68601	4.62214	4.96263	4.91041	5.09234	5.10538
ENSG00000169905	TOR1AIP2	4.30942	4.89572	4.71731	4.95263	4.73259	4.70094	4.8893	4.91591	4.96216	5.13194	5.39819	5.41297	5.2976	5.0752	5.0219	4.81717	4.937	4.85308	5.0822	5.0532	5.23739
ENSG00000187720	THSD4	4.30942	1.92592	4.45111	2.39529	4.38059	4.60256	4.30715	2.79834	2.59437	3.41824	1.71898	1.71082	1.41311	3.1095	3.61444	3.26595	3.68332	3.19106	2.58083	2.25181	3.05338
ENSG00000104853	CLPTM1	4.30619	3.35429	4.09105	4.14896	3.75104	3.70509	3.70558	4.1442	4.06242	3.89387	3.87663	4.29857	3.86766	4.00595	3.99007	3.85447	3.83821	3.41994	3.5291	3.84307	3.37157
ENSG00000168374	ARF4	4.30619	4.11555	4.68287	4.32352	4.33816	4.2606	4.49955	4.81839	5.20274	4.85077	5.25772	5.39748	5.38518	5.17443	4.66142	4.9281	4.66647	4.58642	4.84263	5.26513	5.37652
ENSG00000168672	FAM84B	4.30295	3.86631	4.67037	3.84538	4.25848	4.08636	3.64132	2.2139	2.69475	2.61043	2.29074	1.87889	2.14689	1.85755	1.76574	2.47552	2.0881	2.9736	2.64805	2.14569	2.00366
ENSG00000112096	SOD2	4.2997	6.83966	3.96977	4.26448	5.21302	3.80297	4.46051	2.1853	2.16312	2.50602	3.23594	2.34865	1.96664	1.57837	1.47984	2.08347	2.22232	1.81913	2.459	1.88246	2.70727
ENSG00000130787	HIP1R	4.2997	4.60098	4.22359	4.06646	3.68485	4.05348	3.99473	4.7032	4.42484	4.48242	4.31532	3.91439	4.3721	4.36749	4.98369	4.95073	4.84812	5.00902	5.04411	4.75976	4.65514
ENSG00000132424	PNISR	4.2997	4.20998	4.85625	4.59977	4.16446	4.35633	4.24769	3.51969	3.6042	3.85808	3.51233	3.40997	3.557	3.67738	3.91166	3.60371	4.07734	4.32062	4.31755	3.69208	3.80977
ENSG00000174197	MGA	4.2997	4.48826	4.25742	4.20402	4.67238	4.49378	4.35927	3.53866	4.09572	3.95299	3.92332	3.7425	3.58633	3.82403	3.85691	3.49314	4.16858	4.14583	3.95045	3.91781	3.7153
ENSG00000070610	GBA2	4.29644	3.82712	4.14626	3.73983	3.77669	3.84033	3.42933	5.34413	4.81843	4.84454	4.31875	4.28179	4.83452	4.50073	5.31377	5.12181	5.45412	5.73351	5.23212	4.73558	4.68388
ENSG00000073008	PVR	4.29644	4.75818	3.90722	4.39094	3.23245	3.40078	3.27375	5.28283	5.62562	5.2926	6.24633	6.13306	6.19176	5.89701	5.24985	4.77917	5.00853	5.03645	4.66834	5.3714	4.74119
ENSG00000099783	HNRNPM	4.29644	3.86057	4.52796	3.81827	3.79772	4.0404	4.11644	4.96628	4.74445	4.17851	4.79603	4.99379	4.41979	4.81228	4.1155	4.85746	4.11402	3.49453	3.42687	4.52008	4.09237
ENSG00000101191	DIDO1	4.29644	3.97787	3.88575	4.14437	4.17735	4.00494	3.88454	4.35861	4.21474	4.08041	3.94478	3.97362	4.10727	4.23584	4.21779	4.16445	4.41414	4.42303	4.28894	4.28574	4.09237
ENSG00000125970	RALY	4.29644	3.63037	4.24061	3.98025	4.0604	4.01091	4.02653	4.21979	4.14427	4.11188	4.0939	4.18486	3.90624	4.19285	4.09342	4.39343	4.05995	3.93749	3.80253	4.16318	3.96794
ENSG00000132694	ARHGEF11	4.29644	4.44673	4.12809	4.27186	4.25848	4.09201	4.24363	3.66026	3.54794	3.66651	3.6285	3.76949	3.54347	3.7354	3.88703	3.53186	3.89717	3.70504	3.64614	3.59685	3.61666
ENSG00000146247	PHIP	4.29644	4.19979	4.91041	4.34768	4.50089	4.68049	4.79276	3.21626	3.93376	3.54002	3.91791	3.96664	3.82728	3.56529	3.313	3.45624	3.31831	3.73882	3.55946	3.65245	3.93491
ENSG00000138246	DNAJC13	4.29318	4.09248	4.32279	4.14437	4.18376	4.37959	4.24363	4.54085	4.65535	4.79	4.56323	4.59412	4.36596	4.46504	4.8151	4.54915	4.64913	4.64442	4.72011	4.64182	4.74157
ENSG00000161013	MGAT4B	4.29318	3.77162	3.30187	3.61933	3.86701	3.74146	3.80427	4.99128	4.71591	5.23659	4.79455	4.98691	4.83637	4.69341	5.14297	5.0823	5.21429	5.01983	5.15763	4.8325	4.56024
ENSG00000175662	TOM1L2	4.29318	3.65212	3.42605	4.39963	3.73804	4.22509	4.23957	3.17644	2.76011	3.17603	3.3977	3.64384	3.83766	3.32189	3.25515	3.21078	3.46819	3.20941	3.33971	3.25701	2.92604
ENSG00000073712	FERMT2	4.28991	5.13678	4.7438	4.50182	4.47239	4.87143	4.89362	4.41581	4.66988	4.90909	5.08728	5.05979	4.9481	4.77769	4.57618	4.36462	4.26202	4.52546	4.52599	4.72811	4.84836
ENSG00000143933	CALM2	4.28991	5.11946	5.16331	5.01303	4.59038	4.94656	5.14822	5.16408	5.75711	5.82331	6.15473	6.06279	6.05839	5.7746	5.21367	5.35751	5.10112	5.44933	5.46454	5.6871	6.29625
ENSG00000185022	MAFF	4.28991	5.96338	5.95696	5.19767	4.2091	4.56552	5.68556	3.41546	4.10581	3.84744	3.58132	3.07122	3.71827	3.91651	3.21086	3.4677	3.8156	3.46864	3.17244	4.05442	4.06151
ENSG00000213639	PPP1CB	4.28991	4.62657	6.10272	4.9767	5.15715	5.47528	5.90542	3.22096	3.71054	3.76689	4.2536	4.28553	3.92723	3.62352	3.47158	3.79432	2.89276	3.28923	3.38624	3.46742	4.44032
ENSG00000244462	RBM12	4.28991	3.76856	4.15705	4.42444	3.80605	3.92023	4.00594	4.76624	4.86151	4.75388	4.66317	4.60015	4.72047	4.80262	4.63898	4.50048	4.53484	4.48729	4.4262	4.76674	4.80745
ENSG00000055332	EIF2AK2	4.28663	2.80711	4.79076	4.89506	4.46977	4.89422	4.65715	3.09678	3.21416	3.54442	3.65912	4.00121	3.09155	3.22684	3.00349	3.16577	2.92	3.33532	3.48617	3.17046	3.44424
ENSG00000101608	MYL12A	4.28663	5.56239	5.27322	5.23861	5.11085	5.2151	5.51504	5.36198	5.67983	6.01107	5.88602	5.70069	5.97666	5.89996	5.6791	5.59116	5.5978	5.84315	5.80963	5.71245	6.08818
ENSG00000164916	FOXK1	4.28663	3.90167	2.82162	3.75496	4.2091	4.13365	4.15579	4.7716	4.56221	4.59593	4.71976	4.70454	4.56171	4.7085	4.74145	4.73542	4.77435	4.59542	4.44917	4.64255	4.43292
ENSG00000164976	MYORG	4.28663	3.667	4.64759	4.75157	4.21223	3.73606	4.32643	0.876946	1.46117	2.02599	2.66505	2.79467	1.65045	1.42561	1.03597	0.811844	0.930557	0.736564	1.16765	0.861503	0.526954
ENSG00000186575	NF2	4.28663	3.91142	3.16598	3.64717	3.77244	3.74325	3.62063	5.82858	5.68951	5.81719	5.97888	5.41639	5.80107	5.78568	5.9507	5.61711	6.05678	5.80055	4.71538	5.69653	5.91355
ENSG00000028528	SNX1	4.28334	3.07089	4.31638	4.03829	4.35528	4.17678	4.09411	3.73122	3.18351	3.27863	3.34622	3.61138	3.09774	3.31783	3.37806	3.6192	3.26923	2.85204	2.65415	3.07732	2.29453
ENSG00000116991	SIPA1L2	4.28334	4.22904	3.38379	3.1598	4.01083	3.39394	3.2416	3.13384	2.64716	2.64567	2.00433	2.19784	1.9087	2.41424	3.31914	3.18151	3.03302	3.00396	2.79186	2.84087	3.0654
ENSG00000143842	SOX13	4.28334	2.67274	3.64631	3.53068	3.57219	4.25809	3.51476	2.81503	2.68804	2.80452	2.73857	3.31056	2.60513	2.95758	2.94584	2.92732	2.89472	2.68597	3.2828	2.69939	2.57566
ENSG00000159363	ATP13A2	4.28334	3.82859	2.95129	3.48785	3.23862	3.37786	3.41739	3.65679	3.235	3.10333	3.12752	2.93003	2.94964	3.2196	4.13376	3.54002	3.26164	3.33532	2.98562	2.96162	3.06301
ENSG00000215021	PHB2	4.28334	4.56526	3.71122	4.4874	4.26755	4.34574	4.44176	5.39289	5.40327	5.27085	5.10526	4.99494	5.38189	5.28438	5.19205	5.15673	5.29825	5.1494	5.00707	5.34611	5.1783
ENSG00000144036	EXOC6B	4.28005	4.9076	5.11431	4.94473	5.28925	4.31108	5.22833	3.14378	3.01968	3.08533	3.34488	3.21561	3.52614	3.44872	3.18011	2.9942	3.40073	3.21721	2.85938	3.2767	2.7936
ENSG00000152492	CCDC50	4.28005	4.44385	5.22616	4.72415	4.57828	5.03857	5.0847	4.48458	4.80223	4.9565	5.17879	5.21512	5.23723	5.00279	4.59354	4.74074	4.67563	4.84388	4.96109	4.90024	5.12791
ENSG00000169926	KLF13	4.28005	4.53585	3.87707	4.96178	4.77986	4.94812	5.10643	3.96511	3.86411	4.2107	3.77846	3.83994	3.52522	3.85428	3.85098	4.02506	3.85242	3.7523	3.933	3.64309	3.74549
ENSG00000009335	UBE3C	4.27674	4.26641	4.06836	4.34268	3.83482	4.17678	4.14714	4.778	4.82608	5.02067	5.14365	5.10075	5.18007	5.07359	4.85119	4.82443	4.86224	4.77294	4.63095	4.96841	5.02582
ENSG00000009954	BAZ1B	4.27674	4.25552	4.07216	4.15923	4.1317	4.26185	4.15003	4.76302	4.88294	4.78768	4.81945	5.04329	4.86929	4.9438	4.62565	4.69029	4.53484	4.62013	4.19274	4.82552	4.62704
ENSG00000058272	PPP1R12A	4.27674	4.66247	4.96261	4.80779	4.46452	4.55227	4.70017	3.79991	4.0494	4.12001	4.18463	4.26102	4.03174	3.99327	3.77338	3.61147	3.60636	4.07753	3.90323	3.73744	4.05429
ENSG00000106771	TMEM245	4.27674	4.10467	5.01892	4.75458	5.2996	5.0718	5.11089	3.74326	3.8656	3.94552	4.31394	4.23414	4.0285	3.7804	3.90758	3.92056	3.72363	3.99756	3.93551	3.8846	3.90111
ENSG00000130589	HELZ2	4.27674	3.58758	4.65776	5.5579	3.82666	4.83403	4.69028	2.53928	2.4942	2.71171	3.00177	2.27521	2.4416	2.3652	2.70786	2.75804	3.16574	3.02484	2.88164	2.33643	2.18424
ENSG00000145349	CAMK2D	4.27674	4.47141	5.26991	4.69228	4.375	5.05817	4.87103	2.32295	2.40301	2.86557	3.35426	3.51897	3.3414	2.24479	2.70223	2.45839	2.50013	2.83526	3.33497	2.46456	2.12805
ENSG00000121892	PDS5A	4.27344	4.2986	4.78614	4.55639	4.36094	4.66163	4.47671	4.6663	5.00594	5.09829	5.15444	5.24235	5.01468	4.931	4.74602	4.71513	4.82823	4.89823	4.68555	4.91677	5.06016
ENSG00000149823	VPS51	4.27344	5.27857	3.52935	4.56671	4.00723	4.41605	4.49728	3.70684	3.39377	3.62868	3.46608	2.60391	3.54256	3.41487	3.83733	3.79318	3.781	4.037	4.0176	3.71494	3.57608
ENSG00000163171	CDC42EP3	4.27344	4.58541	5.53418	6.14221	4.5952	5.20015	4.71975	4.99082	4.91487	5.48113	3.81969	4.43801	3.98578	4.32628	4.7318	4.69882	5.20681	4.69414	4.67472	4.23872	4.69514
ENSG00000166887	VPS39	4.27344	3.74695	3.67162	3.99816	3.90627	3.66779	3.76145	3.63345	3.31982	3.53007	3.23013	3.23898	3.2937	3.32054	3.83819	3.55352	3.95192	3.71608	3.69501	3.48687	3.40789
ENSG00000177303	CASKIN2	4.27344	3.52727	4.34498	4.36454	3.73368	4.15132	4.3226	2.56911	2.65406	2.87609	3.11021	3.34327	2.72027	2.8226	2.74853	2.92939	2.54331	2.53823	2.74977	2.66566	2.33481
ENSG00000104765	BNIP3L	4.27012	4.40396	5.6029	5.03489	8.61673	5.2802	5.6292	3.53991	3.74647	4.26637	3.48696	3.56284	3.27088	2.77399	4.03559	4.33286	4.07906	4.23555	4.60168	3.70736	4.17178
ENSG00000109099	PMP22	4.27012	3.37658	3.78266	4.39577	3.09649	3.77517	3.70755	3.34682	3.29136	3.5345	3.10546	3.86769	2.71223	3.72521	3.28436	3.69304	2.80572	2.52782	3.19457	3.22166	3.52652
ENSG00000122642	FKBP9	4.27012	4.55197	4.24061	4.73945	4.46977	4.40928	4.5142	3.2611	2.92024	3.47811	3.23158	2.74658	2.94141	3.13127	3.75263	3.6192	3.7488	3.80497	3.68908	3.35462	3.32334
ENSG00000130052	STARD8	4.27012	3.96188	3.67663	3.47877	3.36236	4.09341	3.51924	2.56418	2.31874	3.03149	2.65424	3.22734	2.18691	2.45181	2.49838	2.85937	2.73298	2.27747	2.68276	2.2537	2.36623
ENSG00000133657	ATP13A3	4.27012	4.47611	3.57835	3.85945	3.97804	3.83866	4.48474	4.1849	4.61881	4.22516	4.76671	4.73636	5.28356	5.60293	4.41442	4.13602	3.85746	3.95779	3.70606	4.74267	4.86324
ENSG00000109606	DHX15	4.2668	4.8802	4.90188	4.74855	4.26151	4.57663	4.52871	5.24676	5.37433	5.2745	5.39364	5.51299	5.51173	5.46213	4.95436	5.01362	4.95639	5.04487	4.98275	5.3829	5.49677
ENSG00000130340	SNX9	4.2668	4.24564	3.92417	4.57612	3.55253	3.86527	3.83871	3.84733	3.75771	4.14413	3.72365	4.10234	3.70698	3.93166	3.8687	3.8675	3.75854	3.80928	3.90771	3.8913	3.71987
ENSG00000149577	SIDT2	4.2668	3.13886	4.01793	4.35266	3.76392	3.85202	3.52593	2.63639	2.26571	2.03852	2.08386	1.96548	2.17056	2.18952	2.32832	2.05337	2.6471	2.59517	2.60306	2.05523	1.61952
ENSG00000171115	GIMAP8	4.2668	4.06029	2.86615	3.11594	3.09649	3.78914	2.67481	4.56449	4.29413	4.27367	4.16648	4.41426	4.02201	3.80963	4.60012	4.58903	4.23284	4.61718	5.24227	4.10668	4.1933
ENSG00000177885	GRB2	4.2668	4.81715	3.85956	3.97509	4.57828	4.11852	4.18144	4.50273	4.42383	4.48585	4.57245	4.59714	4.65779	4.37989	4.38834	4.51436	4.26733	4.10159	4.22944	4.36758	4.28916
ENSG00000187555	USP7	4.2668	4.02609	4.40054	4.32454	4.6701	4.16209	4.02496	4.67376	4.70599	4.58262	4.67124	4.91741	4.75611	4.89281	4.7318	4.63421	4.58858	4.81806	4.51263	4.70995	4.7017
ENSG00000164741	DLC1	4.26346	5.208	6.36646	6.12601	5.24246	5.44086	5.91819	4.50594	4.81843	4.55072	4.79947	4.6634	4.89331	4.98667	4.90901	5.07249	5.25612	5.44075	4.81194	5.47565	5.32597
ENSG00000129083	COPB1	4.26012	5.00836	4.87816	4.78069	4.49832	4.78435	4.96837	5.2137	5.31249	5.35842	5.36309	5.31286	5.67186	5.32172	5.14263	5.14162	5.11508	5.44491	5.2998	5.49899	5.66574
ENSG00000196961	AP2A1	4.26012	4.05904	3.6412	3.85243	4.83176	3.67156	3.73859	4.66458	4.4802	4.52534	4.36193	4.58047	4.46595	4.47906	4.75512	4.70489	4.76901	4.71585	4.71356	4.54387	4.07643
ENSG00000110492	MDK	4.25678	3.78077	4.02188	4.58207	4.29443	4.87143	4.31489	3.47313	3.26458	2.68805	2.54607	1.93719	1.97204	2.54747	3.67707	3.6396	3.21998	3.62721	3.54559	3.04379	2.75406
ENSG00000127948	POR	4.25678	4.67233	4.09853	4.17844	3.75964	4.33388	4.15579	3.39757	3.2001	3.07167	3.09749	2.78941	3.46428	3.39057	3.1774	3.11386	3.10091	3.13043	3.22356	3.43941	3.11365
ENSG00000169057	MECP2	4.25678	3.57712	4.01793	4.10594	4.19965	4.27059	4.00913	3.38085	3.42836	3.38305	3.1752	3.30688	3.13671	3.21232	3.32527	3.4548	3.47083	3.48056	3.33876	3.32702	3.29402
ENSG00000169855	ROBO1	4.25678	5.15741	2.97588	4.00704	2.63664	1.7743	4.15435	3.63345	3.77837	3.28391	3.95891	2.7136	3.59161	4.26639	3.82442	3.64844	3.56381	3.67422	2.64346	3.63003	3.62643
ENSG00000172890	NADSYN1	4.25678	4.37607	3.91572	4.042	3.50728	3.75753	3.55674	4.55831	4.12206	4.28949	3.76545	3.22734	3.77341	3.99666	4.49919	4.23235	4.69716	4.50915	4.63905	3.93797	4.10524
ENSG00000115806	GORASP2	4.25342	3.48127	3.98601	4.42633	3.6575	3.93287	3.9035	4.46885	4.2897	4.59593	4.27282	4.46962	4.48967	4.37273	4.4552	4.22983	4.3426	4.14923	4.25875	4.36758	4.20421
ENSG00000149131	SERPING1	4.25342	3.00739	4.64759	4.56928	3.53259	3.84033	2.92137	-6.04192	-3.59904	-3.29122	0.0263064	-0.0392008	-3.04831	-4.92942	-7.87991	-5.19266	-6.0429	-5.09633	-5.91343	-5.99896	-8.17001
ENSG00000157557	ETS2	4.25342	4.80001	4.32598	4.5512	4.15145	3.78566	4.11644	3.98645	3.77046	3.77252	3.71639	3.75336	3.14391	3.48179	3.53741	3.37796	3.81974	3.22625	3.58442	3.05578	3.76035
ENSG00000185122	HSF1	4.25342	4.11555	4.70755	4.70947	3.95576	4.24295	4.09711	4.57677	4.39016	4.4269	4.02421	4.09169	4.23288	4.30932	4.68495	4.32816	4.71449	4.29261	4.2477	4.24445	4.044
ENSG00000030066	NUP160	4.25006	3.32333	4.30349	3.59768	3.68033	4.33864	4.11348	2.89374	2.96805	2.77112	3.29979	3.97362	3.06021	3.15273	2.38101	2.88523	2.27451	2.29722	1.96799	2.71597	2.40269
ENSG00000095319	NUP188	4.25006	3.36243	3.42009	3.67289	3.55747	3.3985	3.45526	4.7032	4.57407	4.7144	4.55511	5.1187	4.67651	4.78556	4.30651	4.24072	4.46456	4.09032	4.05898	4.60744	4.17622
ENSG00000100225	FBXO7	4.25006	3.82859	4.32916	4.60563	7.32681	4.31108	4.34421	4.23304	4.09572	4.53864	4.01494	4.28553	4.36647	4.15158	4.15798	4.03664	4.47181	4.20908	4.26822	4.21414	4.04339
ENSG00000111261	MANSC1	4.25006	3.37457	4.44819	4.57526	4.39446	4.21994	4.12234	3.06399	2.7633	3.62971	3.55598	4.19883	3.22979	2.75006	3.20157	3.21588	3.00058	2.66142	3.30816	2.86088	2.52956
ENSG00000115307	AUP1	4.25006	4.49012	4.01002	4.38219	3.61073	3.7161	3.67582	4.6789	4.56587	4.52033	4.33441	4.31332	4.54415	4.63962	4.39009	4.19837	4.23128	3.88136	4.09919	4.25394	4.02628
ENSG00000116754	SRSF11	4.25006	3.25934	4.89545	3.8067	3.87099	4.15672	3.89491	4.10402	4.26515	4.07129	4.17407	4.293	4.14838	4.14166	4.05045	4.01728	3.96879	4.05161	4.19379	3.98773	4.47046
ENSG00000224078	SNHG14	4.25006	3.7762	4.76277	4.05551	4.65635	4.65593	4.41198	4.41375	4.62321	4.57242	4.27141	4.49248	4.64644	4.37859	4.21317	4.51574	4.70165	4.42247	4.31803	4.50903	4.13861
ENSG00000168175	MAPK1IP1L	4.24669	3.33372	4.78614	4.72722	4.01443	4.30258	4.3226	4.21193	4.54191	4.64131	4.54402	4.93421	4.25575	4.4082	4.17027	4.14853	4.207	3.97475	4.2796	4.37194	4.4911
ENSG00000169764	UGP2	4.24669	4.34764	4.22701	4.65163	3.68936	4.09763	4.29284	3.1877	3.33277	3.63488	3.83988	4.17076	3.82205	3.64639	3.38159	3.69304	2.86899	3.31003	3.14564	3.63294	3.6183
ENSG00000186340	THBS2	4.24669	5.64859	1.3497	3.61271	4.02517	2.95084	4.79091	-2.41743	-2.81054	-5.49286	-1.83924	-2.84656	-1.94296	-4.03634	-1.99727	-3.60769	-3.23555	-7.90368	-3.98743	-2.70618	-3.64645
ENSG00000124067	SLC12A4	4.24331	4.26424	4.29048	4.31027	3.60119	3.7699	4.15723	4.00566	3.91235	3.76312	4.12478	3.64966	4.17262	4.28594	3.74076	3.70881	4.10473	4.07824	4.02468	3.90702	3.82399
ENSG00000145555	MYO10	4.24331	4.29009	4.35439	3.33515	4.93977	4.14591	4.18285	6.10093	5.72678	5.51879	5.31446	5.39315	5.33395	5.86905	6.20015	5.86682	6.05853	6.20018	5.87325	5.69199	5.64547
ENSG00000067066	SP100	4.23992	4.47424	4.61665	4.77254	4.41638	4.4777	4.46283	3.84936	3.88771	4.11188	3.77547	3.84756	3.94724	4.04007	3.79118	3.68937	4.01374	3.92406	3.44368	3.94032	3.9996
ENSG00000105429	MEGF8	4.23992	4.60785	3.69156	3.65848	4.10496	4.25809	4.15723	4.03178	3.9825	3.88088	3.83222	3.32882	3.74453	3.86916	4.51803	4.76879	4.66417	4.85016	4.86448	4.36714	4.23326
ENSG00000136448	NMT1	4.23992	4.45437	3.54587	4.28755	3.97804	4.11713	3.75387	4.86723	4.7396	4.885	4.77522	4.79533	4.88475	4.76481	4.92078	4.64434	4.78232	4.74715	4.50506	4.76939	4.51013
ENSG00000154380	ENAH	4.23992	4.21673	4.07216	3.94242	4.00361	4.18472	4.49501	3.92435	4.21824	3.65943	4.08828	4.22247	4.52729	4.14395	4.37364	4.21206	3.89226	4.16274	3.87545	4.17471	4.42268
ENSG00000164091	WDR82	4.23992	4.48267	4.19595	4.49913	4.48022	4.445	4.5198	4.27738	4.38499	4.11114	4.40643	4.42788	4.37973	4.44965	4.37068	4.48506	4.23128	4.3849	4.29967	4.50228	4.61319
ENSG00000117362	APH1A	4.23653	5.04488	4.48862	4.77847	4.38893	4.82135	5.09748	4.9555	4.70017	4.88804	4.78516	4.56515	4.80835	4.76431	4.82161	4.79461	4.78391	4.65402	4.95801	4.85979	4.85391
ENSG00000118515	SGK1	4.23653	4.72855	3.73543	3.46227	4.1449	4.3315	4.67632	4.59742	4.7517	3.73452	5.17917	4.66914	5.25754	5.67777	4.63307	4.55855	4.44929	4.51707	3.08036	5.1504	5.12848
ENSG00000132274	TRIM22	4.23653	5.108	4.71244	4.97283	4.36094	4.8205	4.62531	3.7487	3.64284	3.91611	3.35826	3.07556	3.48142	3.03389	3.80877	3.69548	4.11823	4.14787	4.50083	3.58111	3.6743
ENSG00000135837	CEP350	4.23653	4.16761	4.40658	4.389	4.67465	4.48737	4.39259	3.31637	3.63415	3.56297	3.74419	3.45722	3.57574	3.42372	3.49458	3.37187	3.77355	3.78151	3.63076	3.71906	3.71225
ENSG00000038219	BOD1L1	4.23313	3.61681	4.27735	4.20402	4.71722	4.10463	4.00115	3.47706	3.35622	3.55862	3.07496	3.37525	3.06021	3.41487	3.59936	3.45192	3.52632	3.74153	3.39718	3.41678	3.20557
ENSG00000161021	MAML1	4.23313	2.73366	3.58369	3.23078	3.82256	3.60207	3.11718	3.28226	3.01433	3.2627	3.02211	3.61437	3.03722	2.96626	3.29688	3.25938	3.106	3.03516	3.14456	3.17046	2.99928
ENSG00000163681	SLMAP	4.23313	4.74344	4.12443	4.21938	4.14161	4.32432	4.66019	3.23188	3.33062	3.39528	3.39251	3.3682	3.44111	3.32998	3.3031	3.11386	3.24789	3.27809	3.07355	3.24754	3.31431
ENSG00000165732	DDX21	4.23313	4.7628	4.89974	4.99339	4.10158	4.31591	4.5746	5.43297	5.98848	5.72813	6.18322	6.20897	6.28958	6.12963	5.22419	5.39174	5.1631	5.20566	4.89666	5.82878	6.0185
ENSG00000186480	INSIG1	4.23313	4.90062	4.82275	4.1247	4.57097	4.55432	5.28398	2.91131	3.10266	4.41854	3.30947	3.37525	3.69805	2.78384	2.53899	2.74398	3.47346	3.45552	3.80116	3.56975	3.00304
ENSG00000070413	DGCR2	4.22971	4.04393	4.03364	4.08694	4.3917	4.32432	4.26111	3.92146	3.53492	3.64925	3.60286	3.53793	3.59686	3.53643	4.0281	3.97175	3.52759	3.71333	3.83443	3.68438	3.48328
ENSG00000100129	EIF3L	4.22971	4.96956	4.42753	4.4197	4.71722	4.95588	5.08168	4.48262	4.31494	4.41794	4.37845	4.37964	4.42324	4.19285	4.49648	4.61115	4.66302	4.58742	4.81772	4.66619	4.48976
ENSG00000105426	PTPRS	4.22971	2.49892	4.07596	3.37878	4.43261	4.36801	4.43111	2.52667	2.3948	1.59248	1.85365	2.19784	2.3698	2.35994	3.18281	2.81969	1.78365	2.73022	2.40036	2.16996	1.5765
ENSG00000141551	CSNK1D	4.22971	3.58236	4.39447	3.58079	4.29443	3.72521	3.85119	4.00657	3.51612	3.47926	3.54549	3.99437	3.09031	3.74149	3.69515	3.95861	3.33431	2.95352	2.81517	3.33509	2.62521
ENSG00000149136	SSRP1	4.22971	4.19523	3.92417	4.26765	3.66667	3.6545	3.888	5.23789	5.26205	5.30885	5.0933	5.4104	5.31576	5.40963	5.01623	5.12	5.14631	5.01164	4.71465	5.22925	5.11524
ENSG00000159200	RCAN1	4.22971	4.01709	5.05014	3.8125	3.60119	4.4505	4.5638	1.77613	1.9777	1.83447	2.58304	2.11608	2.39212	2.085	1.51025	1.90537	1.71865	1.61792	1.664	1.99312	2.07673
ENSG00000163820	FYCO1	4.22971	3.30865	3.73543	3.79796	3.91785	3.85036	3.93567	3.03579	2.84692	3.12993	3.10387	3.40997	2.40415	3.1359	3.12921	3.18325	3.00058	2.75185	2.35429	2.62236	2.0672
ENSG00000140319	SRP14	4.2263	4.6975	4.38226	4.60312	4.11169	4.47878	4.40232	4.60764	4.28194	4.32381	4.02673	4.1087	4.12556	4.2963	4.4496	4.26964	4.10812	4.16207	4.16205	3.97229	4.10931
ENSG00000168994	PXDC1	4.2263	4.16529	4.73423	4.93147	4.18376	4.9411	5.05879	3.60013	3.28915	3.47696	4.14886	4.01707	4.55002	4.45521	3.59531	3.15696	3.61591	3.6855	3.56675	3.89312	3.64337
ENSG00000174243	DDX23	4.2263	4.61809	3.91572	4.2613	3.70725	3.98536	3.88106	4.78278	4.83217	4.57458	4.63209	4.36024	4.83341	4.81613	4.74648	4.63675	4.81119	4.58842	4.39286	4.72708	4.62013
ENSG00000111716	LDHB	4.22287	5.35097	4.25072	4.21062	4.28553	4.91904	4.95025	6.02854	6.1717	5.95681	6.22401	5.98662	6.44724	5.99231	5.85384	6.1142	6.1398	6.35481	6.2543	6.52582	6.52462
ENSG00000112308	C6orf62	4.22287	3.85336	4.07596	4.29896	5.05605	4.34928	4.45818	4.7748	4.91487	4.87018	5.07192	5.10711	4.88797	4.97553	4.84225	4.84654	4.53484	4.7552	4.93816	4.92778	5.29236
ENSG00000140299	BNIP2	4.22287	4.77811	5.1722	4.83153	4.69048	5.08389	5.22833	4.07486	4.25044	4.39984	4.2536	4.09596	4.10543	4.05479	4.13306	4.06237	3.90401	4.19205	4.51095	4.17171	4.91927
ENSG00000165424	ZCCHC24	4.22287	3.32957	3.89007	3.67608	4.20595	4.33626	4.00435	0.868976	0.635017	1.34761	1.89833	1.81813	1.61638	0.759077	0.615941	0.997167	0.785765	1.30821	1.77727	0.90552	0.285313
ENSG00000113441	LNPEP	4.21943	3.8706	4.77917	4.47466	4.98264	4.89826	5.07637	3.3193	3.42434	3.44907	3.97378	4.03498	3.48425	3.69315	3.67803	3.38402	3.01148	3.52101	3.75723	3.28598	3.79973
ENSG00000113712	CSNK1A1	4.21943	4.93653	4.65268	4.78143	4.35244	4.71656	4.75719	4.81113	4.7653	4.87062	4.8073	4.8943	4.87146	4.78409	4.80768	4.88282	4.92264	4.8958	4.91232	4.94106	4.97989
ENSG00000127947	PTPN12	4.21943	3.13173	4.52519	3.9595	4.33528	4.10183	3.82431	3.59773	3.45032	3.17461	3.17823	4.31515	2.70739	3.32189	3.38511	3.59067	2.61412	2.40352	2.5728	2.53008	2.55535
ENSG00000134318	ROCK2	4.21943	4.26858	4.69527	4.52231	4.24629	4.67203	4.41679	4.18088	4.3182	4.55345	4.75865	4.83548	4.51393	4.41392	4.3474	4.43122	4.01825	4.45305	4.42575	4.47007	4.63553
ENSG00000100811	YY1	4.21599	3.94841	4.20984	4.41018	4.53134	4.37728	4.36922	4.06356	4.1936	4.2617	4.27494	4.32792	4.20851	4.0782	4.18449	4.27209	4.12828	4.15397	4.18487	4.08345	4.21881
ENSG00000113732	ATP6V0E1	4.21599	4.72934	4.54723	4.82151	4.29443	4.10183	4.31875	4.40964	4.50425	4.50065	4.71196	4.59261	4.69377	4.48148	4.38365	4.2095	3.98178	3.99	4.02291	4.33531	4.1623
ENSG00000123091	RNF11	4.21599	4.31863	4.78382	4.71102	6.26642	4.92301	4.97246	3.62756	3.6872	3.71708	3.94301	4.04606	3.75474	3.67632	3.69987	3.68325	3.35013	3.63983	3.86037	3.60429	4.06929
ENSG00000128284	APOL3	4.21599	4.55018	4.00206	4.2687	3.42857	4.37149	3.82972	0.991506	0.141202	2.06327	2.17142	1.85892	1.0494	0.448097	1.80483	1.52159	1.86198	1.82933	2.70349	0.594988	-0.131095
ENSG00000137207	YIPF3	4.21599	4.02353	3.99405	4.18404	4.05692	3.89139	4.07142	4.48001	4.13074	3.88869	3.74826	3.70664	4.02331	4.19063	4.43495	4.3036	3.96693	3.87234	4.13288	4.062	3.93949
ENSG00000165495	PKNOX2	4.21599	2.97588	4.30995	3.01145	3.9854	4.13091	3.3461	-3.92644	-2.66615	-1.8375	-0.129429	0.659797	-1.37846	-1.36174	-7.87991	-5.19266	-7.62786	-3.0457	-4.77593	-5.15097	-8.17001
ENSG00000168734	PKIG	4.21599	4.34764	3.745	3.64555	3.26302	3.82686	3.54362	5.49902	5.3607	5.56959	4.7652	5.01538	4.57729	4.68765	5.30574	5.17345	5.00672	5.05251	5.00528	4.76076	4.96329
ENSG00000204120	GIGYF2	4.21599	4.18034	3.98601	4.19295	4.02517	4.00045	3.96222	3.74762	3.82188	3.78745	3.69544	3.79336	3.94106	3.87101	3.65098	3.57883	3.86649	4.00659	3.73941	3.74755	3.59029
ENSG00000206503	HLA-A	4.21599	6.07849	5.01497	5.67985	5.02606	5.14149	4.98384	2.83767	3.49131	4.23608	3.89696	3.35757	2.92062	3.49384	3.23057	4.02796	4.29954	4.48676	4.37174	2.72145	3.55151
ENSG00000215030	RPL13P12	4.21599	5.95331	3.80112	4.64758	4.26755	4.51179	4.38525	4.16632	3.82494	4.0034	4.15271	3.30319	3.64327	3.52002	4.11832	3.75863	4.37108	5.02206	3.88779	3.79448	3.76035
ENSG00000012817	KDM5D	4.21254	-7.11026	4.18895	3.8096	-2.4649	3.76107	-4.49311	3.03222	3.07467	3.05943	-5.39996	2.90103	-5.77078	-5.41485	3.35311	2.96013	3.44561	-5.58175	3.39536	-8.32089	-8.17001
ENSG00000119535	CSF3R	4.21254	6.33979	2.90081	2.08154	6.07555	0.492182	3.19759	-4.81952	-7.05847	-4.64486	-3.63442	-3.98406	-6.50774	-7.73678	-7.87991	-7.51459	-7.62786	-6.31872	-8.23536	-6.73593	-8.17001
ENSG00000120071	KANSL1	4.21254	3.88904	4.07216	3.70285	4.45661	4.04186	3.62687	3.43314	3.06952	3.0189	3.26182	3.28085	3.12828	3.02726	3.32037	3.24114	3.30066	3.35312	3.46552	3.29428	2.89001
ENSG00000141279	NPEPPS	4.21254	3.62021	4.20984	3.77884	3.97804	3.95317	4.08054	3.09165	3.05136	3.127	3.14153	3.61437	2.98611	3.0552	2.89075	3.39155	3.04368	2.84703	2.71666	3.02396	2.47474
ENSG00000148516	ZEB1	4.21254	4.28152	4.88033	5.09022	4.22471	4.45708	4.5917	4.95691	5.11177	5.46758	4.99643	5.06306	4.64729	4.77966	5.1954	4.97702	5.00354	5.14327	5.01509	4.74233	5.12015
ENSG00000171490	RSL1D1	4.21254	4.08265	3.90722	4.00071	4.12839	4.25054	4.00754	4.54148	4.80688	4.75008	4.8736	5.0455	4.905	4.78015	4.27901	4.26636	4.25363	4.35636	4.27615	4.69051	4.525
ENSG00000186468	RPS23	4.21254	5.27102	4.8825	4.96244	5.21614	5.11748	5.55047	3.81658	4.16251	4.165	4.04008	4.05266	4.32066	4.20757	3.5882	4.53696	4.29361	3.74513	4.32808	4.60076	4.8622
ENSG00000023171	GRAMD1B	4.20908	2.93823	4.00604	3.13457	4.24935	3.96244	3.42695	0.249638	0.648889	0.44731	0.982017	1.40137	0.320923	0.077003	0.693733	0.502223	0.285026	0.615955	0.555805	-0.420025	-0.990105
ENSG00000119669	IRF2BPL	4.20908	4.27291	4.6088	4.49733	4.49832	4.28544	4.66828	1.9786	2.16312	2.3413	2.1925	2.20577	2.64285	2.36257	2.16038	2.01094	2.51552	2.38288	2.34113	2.50645	2.15304
ENSG00000176845	METRNL	4.20908	5.05056	3.79653	4.54512	4.18376	4.09482	4.73907	2.30238	2.14365	2.56351	2.7948	2.32701	2.7968	2.49324	2.3997	2.31672	1.61769	2.33592	1.80219	2.31119	1.80583
ENSG00000198231	DDX42	4.20908	3.21054	4.15705	3.78032	4.0216	3.98839	3.92052	4.11922	3.93518	3.99297	4.16495	4.44137	4.06369	4.272	4.00235	4.11886	3.93771	3.56647	3.51911	4.13161	3.84016
ENSG00000213949	ITGA1	4.20908	4.84139	3.34656	4.07974	4.06388	4.24295	4.6612	-0.550064	-0.458557	-0.135305	-0.502718	-0.239898	0.16939	-0.576907	0.382181	0.802827	-0.0656209	-0.064477	-0.346615	-0.532989	-0.702408
ENSG00000100697	DICER1	4.20561	4.18838	4.14264	4.02213	4.35244	4.20309	4.47901	3.46257	3.63763	3.86689	3.90884	3.99208	3.77109	3.91382	3.52682	3.44469	3.75097	3.883	3.79565	3.67028	3.99646
ENSG00000121858	TNFSF10	4.20561	4.42259	4.90188	4.98122	4.85603	4.56247	4.86312	1.85088	1.77758	2.14956	2.55074	1.53322	1.28451	0.176111	2.48968	2.1093	1.91323	1.87275	2.94144	0.252755	0.697265
ENSG00000132622	HSPA12B	4.20561	2.67601	3.81027	3.89267	2.9688	4.13501	3.6977	1.55054	2.01031	3.10184	2.8771	2.45224	1.88027	2.01644	1.69184	2.61341	2.85293	2.10894	2.11889	1.58148	1.14966
ENSG00000197457	STMN3	4.20561	3.96989	3.84183	4.46089	3.28106	3.80984	4.03124	-2.26933	0.518959	2.18381	2.21916	1.65401	-0.203962	0.859412	-1.94918	-2.87073	-1.79497	-2.54613	-2.454	-2.34361	-2.61542
ENSG00000197448	GSTK1	4.20214	4.11073	4.1642	4.215	4.01802	3.98081	4.02023	3.19887	3.235	3.5962	3.37812	3.26955	3.32251	3.25828	3.62242	3.38099	3.69688	3.34009	3.60974	3.36692	3.05941
ENSG00000283041	AC008038.1	4.20214	5.2994	4.22701	4.67329	4.68146	4.71747	4.8754	4.5932	4.61616	4.57941	4.38238	4.28927	4.65024	4.59666	4.74967	4.62529	4.62569	4.73408	4.72772	4.56156	4.35183
ENSG00000136758	YME1L1	4.19865	4.80749	4.67288	4.38024	4.34674	4.62901	4.66727	4.85668	5.30649	4.9996	5.33323	5.26434	5.40851	5.12101	4.83068	5.034	4.74146	4.96302	5.00379	5.26489	5.46287
ENSG00000141002	TCF25	4.19865	4.32801	3.79653	4.22482	3.94072	3.95935	4.07142	4.54211	4.11208	4.21208	3.95539	3.57818	4.20679	4.14166	4.48941	4.3258	4.60845	4.54108	4.50463	4.21899	4.13405
ENSG00000077097	TOP2B	4.19516	4.52773	4.48862	4.31844	4.50856	4.58065	4.50633	4.44022	4.58313	4.48356	4.51801	4.51818	4.6153	4.52972	4.66626	4.57387	4.48425	5.03718	4.82449	4.67858	5.04476
ENSG00000077150	NFKB2	4.19516	4.5484	3.62574	3.86365	3.42317	3.29465	3.12894	2.09934	2.19656	2.51052	2.55772	2.44556	2.17525	1.78874	2.06407	2.04956	2.62598	2.56901	2.78632	1.79675	0.909471
ENSG00000100422	CERK	4.19516	4.86738	3.2757	3.2544	3.5376	3.67908	3.84763	5.44643	5.00863	5.07871	4.68192	4.48599	4.93295	5.17255	5.19373	5.2567	5.26601	5.55049	4.92088	5.48777	5.50473
ENSG00000100664	EIF5	4.19516	4.08018	4.28064	4.69699	4.93788	5.06608	4.6044	5.57233	5.57566	5.59474	5.77609	5.81457	5.81315	5.59791	5.45142	5.39587	5.12598	5.40138	5.29955	5.74579	5.89127
ENSG00000107959	PITRM1	4.19516	3.70593	4.08352	4.4235	3.67124	3.54766	3.68182	5.24252	5.44312	5.5514	5.1183	5.40955	5.63893	5.44856	4.96342	4.99395	5.38039	4.79481	5.07028	5.44471	4.97608
ENSG00000173473	SMARCC1	4.19516	4.43326	3.85515	4.32149	4.2028	4.07216	3.97694	5.35807	5.22027	5.07833	4.78566	5.03219	4.81775	5.13724	5.2291	5.11409	5.03814	5.00302	4.85426	5.17708	5.19699
ENSG00000102606	ARHGEF7	4.19166	3.32541	4.40054	3.98923	4.08456	4.06787	4.14569	4.59923	4.14059	4.13541	3.94744	4.08526	3.57485	3.63118	4.59506	4.39568	4.31721	3.95236	4.05898	3.7039	3.48686
ENSG00000104967	NOVA2	4.19166	2.21842	3.94922	3.57057	3.85502	3.79952	3.58691	3.31197	2.55071	3.09885	2.32387	2.94904	2.09588	2.4836	3.25259	3.43013	3.44962	2.93316	2.91121	2.50645	2.02597
ENSG00000120279	MYCT1	4.19166	4.23681	5.31879	4.96634	4.15145	5.09236	5.04721	4.48914	4.63545	5.16589	5.17501	5.04991	4.64981	4.70539	4.84012	4.49069	4.59704	4.64875	4.95122	4.54387	5.11061
ENSG00000135870	RC3H1	4.19166	3.57537	4.38838	4.20622	4.54135	4.29404	4.33408	3.46125	3.50091	3.42422	3.51353	3.44723	3.31616	3.47572	3.49675	3.22941	3.48913	3.44339	3.59793	3.43107	3.65056
ENSG00000068654	POLR1A	4.18815	3.59624	3.2423	3.91574	2.9762	3.33567	3.28431	4.57371	4.69767	4.48414	4.52337	4.59412	4.33696	4.71211	4.40751	4.25897	4.61382	4.27467	4.14267	4.44128	4.39247
ENSG00000128245	YWHAH	4.18815	4.53585	4.24061	5.26157	3.914	4.2057	4.24769	4.47148	4.67412	5.10315	4.95957	5.00406	4.82261	4.89735	4.50082	4.55855	4.63453	4.50119	4.17589	4.65478	4.77378
ENSG00000135363	LMO2	4.18815	4.53405	4.55541	4.44605	4.30622	5.11817	4.5638	2.22643	2.04219	2.51052	2.7589	2.25243	2.74886	2.17461	2.08443	2.42646	2.11192	2.2675	2.67828	1.73032	2.02843
ENSG00000153317	ASAP1	4.18815	3.07586	4.28064	3.84397	5.00993	3.81667	3.75387	4.2721	4.24588	4.55944	4.43388	4.93897	4.16557	4.39089	4.18718	4.15031	4.58858	4.24511	4.21611	4.39486	4.33356
ENSG00000165458	INPPL1	4.18815	4.08018	3.88575	3.7818	3.88285	3.82177	3.64337	4.81788	4.43489	4.50911	4.18988	4.13176	4.50325	4.41582	4.91308	4.76532	4.94365	4.80433	4.9101	4.55005	4.35673
ENSG00000014216	CAPN1	4.18463	4.22346	3.81482	4.01962	4.03583	3.87512	4.01072	5.56186	5.33947	5.60662	5.05927	5.19336	5.33605	5.28888	5.5799	5.41855	5.45445	5.20337	5.36931	5.33832	5.21356
ENSG00000103415	HMOX2	4.18463	4.23459	3.24904	3.90899	3.16284	3.70509	3.44823	4.69307	4.56221	4.31353	4.20848	4.03052	4.38581	4.40053	4.84992	4.37378	4.37319	4.38143	3.99496	4.20487	4.34396
ENSG00000115216	NRBP1	4.18463	4.37607	4.01398	4.1212	4.05343	3.81837	3.91033	4.82098	4.32469	4.41674	4.3405	4.42278	4.30149	4.3457	4.64291	4.59034	4.36896	4.33979	4.04744	4.4417	4.09061
ENSG00000141510	TP53	4.18463	3.37859	3.18016	3.6325	3.23245	3.38017	3.24701	4.45959	4.06242	4.09023	3.90884	3.97594	3.94106	3.80287	4.54556	4.48647	4.69829	4.37854	4.6119	4.26384	3.9673
ENSG00000175216	CKAP5	4.18463	3.98448	3.83736	4.10121	3.81019	3.67908	3.77087	5.2996	5.37485	5.53048	5.2811	5.2888	5.35786	5.44856	5.14782	4.92862	5.49318	5.38562	5.00886	5.51782	5.2294
ENSG00000181826	RELL1	4.18463	5.54505	4.28393	4.73182	4.50345	4.4723	4.62011	3.51203	3.7513	3.97516	3.96418	4.00803	3.83766	3.72726	3.24356	3.37796	3.73463	3.47948	3.66965	3.75693	3.73725
ENSG00000185112	FAM43A	4.18463	5.62	4.56355	4.79247	5.34746	5.3712	5.41769	5.19788	5.06727	4.63617	4.86987	4.12551	4.96883	5.04068	5.22649	5.48312	5.17566	5.31443	5.14334	5.08969	5.41624
ENSG00000065882	TBC1D1	4.1811	4.26966	3.23552	4.68123	3.44998	3.71792	3.46689	3.93393	3.87153	4.15927	3.91065	4.24764	3.87344	3.77646	3.86282	3.87074	3.81767	3.99152	3.69723	3.77615	3.57103
ENSG00000103196	CRISPLD2	4.1811	4.45246	5.19682	3.78328	4.68372	4.41829	4.3828	-5.30495	-4.73654	-2.9568	-1.69952	-2.3991	-3.13851	-4.27735	-3.63199	-4.34466	-3.92742	-5.09633	-4.77593	-3.19161	-5.84809
ENSG00000111530	CAND1	4.1811	4.60613	4.69773	4.58291	4.28553	4.77474	4.78998	4.60584	4.83065	4.88587	5.16895	5.02884	5.1062	4.75783	4.62317	4.74192	4.6168	5.09509	4.95894	5.04775	5.24612
ENSG00000128989	ARPP19	4.1811	4.26858	5.45622	4.91136	4.94732	5.29251	5.40504	4.3826	5.04055	5.21467	5.28602	5.34012	5.06669	5.09354	4.54766	4.79062	4.32451	4.4264	4.80716	4.86631	5.43951
ENSG00000148411	NACC2	4.1811	4.18494	3.61011	3.29223	4.16122	4.05492	4.05764	4.17038	3.9632	3.6057	3.92242	3.61734	4.25076	3.91023	4.14557	4.19579	3.88537	3.77887	3.94735	4.2156	3.98132
ENSG00000166619	BLCAP	4.1811	3.86344	4.60618	4.52672	4.53635	4.70555	4.17436	3.67176	3.6166	3.51221	3.46608	3.65835	3.45178	3.5259	3.60943	3.61147	3.54644	3.11104	3.84446	3.58261	3.2981
ENSG00000197912	SPG7	4.1811	4.10952	3.77333	4.00956	3.66667	3.66968	3.80243	4.64895	4.29633	4.40952	4.08668	3.87268	4.34635	4.71881	4.63702	4.47232	4.86574	4.65354	4.39468	4.49989	4.53367
ENSG00000197943	PLCG2	4.1811	2.93823	4.22701	4.04938	4.49317	3.65259	3.53701	1.05612	0.935883	1.44496	1.48024	1.61883	0.870191	0.56243	1.1229	0.286315	1.1633	0.592174	0.995863	0.166948	-0.686198
ENSG00000198053	SIRPA	4.1811	4.22681	3.57835	3.96341	4.12839	3.38937	3.53921	3.13051	2.9373	3.03462	3.13376	3.59035	2.01189	2.9383	3.49675	3.28551	2.68161	2.47461	2.82601	2.45142	2.53993
ENSG00000032444	PNPLA6	4.17756	4.41379	3.51823	3.92246	3.76392	3.57814	3.60598	4.49757	4.25725	4.51473	4.07861	3.88754	4.18313	4.15766	4.65366	4.71814	4.93223	4.73543	4.76552	4.18368	4.12834
ENSG00000052841	TTC17	4.17756	4.60785	4.47431	4.6693	4.30622	4.54303	4.4323	3.55489	3.39788	3.30221	3.21107	2.95846	3.07283	3.28628	3.64021	3.58936	3.65117	3.70504	3.80733	3.36954	3.36963
ENSG00000100647	SUSD6	4.17756	4.73406	4.46276	4.40443	4.56116	4.01834	4.45351	2.95902	2.58358	2.70976	2.74674	2.88136	2.33461	2.33066	3.16789	2.97426	2.55329	2.57509	2.99286	2.28921	2.30876
ENSG00000110514	MADD	4.17756	3.28742	3.79653	3.8383	3.99999	3.71792	3.61437	3.13716	2.73106	3.09286	2.65424	2.76815	2.77071	2.63935	3.00043	3.07132	3.1803	2.94103	3.11613	2.75659	2.62684
ENSG00000129625	REEP5	4.17756	3.55774	4.6088	4.47649	4.17092	4.62317	4.64491	3.44927	3.53865	3.59726	3.77147	4.22442	3.86838	3.51056	3.36385	3.6396	3.08036	3.0189	3.46638	3.608	3.5498
ENSG00000015171	ZMYND11	4.17402	4.04012	4.34183	4.0457	3.91785	4.14862	4.01865	3.34107	3.3541	3.50206	3.49304	3.44723	3.47192	3.53059	3.53424	3.52913	3.37284	3.52938	3.33307	3.48203	3.64176
ENSG00000059758	CDK17	4.17402	4.47986	5.03266	4.44698	4.0948	4.66068	4.43111	5.1038	5.37224	5.45741	5.43056	5.21904	5.33631	5.28853	5.00864	4.64181	4.70165	5.04304	4.83862	5.21693	5.69562
ENSG00000007168	PAFAH1B1	4.17047	4.43712	4.80684	4.60896	4.53885	4.54612	4.66019	4.32331	4.33116	4.30058	4.55975	4.50056	4.48071	4.49414	4.29595	4.38741	4.07128	4.30242	4.15185	4.44791	4.55642
ENSG00000146830	GIGYF1	4.17047	3.87487	4.00206	3.58079	3.46584	3.76814	3.75197	3.36252	3.46411	3.29439	3.28864	3.13488	3.11492	3.28628	3.3898	3.76561	3.52885	3.49986	3.75935	3.51002	3.28993
ENSG00000151835	SACS	4.17047	4.19523	3.60487	3.79357	3.71612	4.02426	4.28628	5.12738	5.79815	5.86106	5.8345	5.60128	5.7566	5.66237	5.10254	5.01606	5.46473	5.75531	5.21856	6.02555	6.10021
ENSG00000156471	PTDSS1	4.17047	4.31128	3.87707	4.25918	4.15797	4.35163	4.21218	4.91543	4.96286	4.741	4.924	5.10499	5.01892	4.89599	4.5382	4.50048	4.49593	4.12457	4.40059	4.83945	4.70401
ENSG00000174718	KIAA1551	4.17047	3.95111	4.65522	4.48649	5.31864	4.83656	4.28628	3.67861	3.93659	4.17425	3.40029	3.38924	3.45081	2.9383	3.99775	3.99073	3.75638	4.38432	4.66532	3.41762	3.52565
ENSG00000244754	N4BP2L2	4.17047	4.4808	5.11615	4.66851	4.6261	4.88206	4.78534	3.13882	3.51612	3.47811	3.53019	3.49976	3.43037	3.32594	3.28938	3.15164	3.3952	3.81528	3.86037	3.38344	3.72443
ENSG00000069702	TGFBR3	4.1669	5.02385	5.07121	4.60479	4.5976	4.29649	5.04721	1.55054	1.05527	1.49583	2.038	2.35579	1.29746	1.41551	1.54005	1.64781	1.57915	1.76343	2.71957	1.40533	1.51824
ENSG00000090372	STRN4	4.1669	3.91419	3.6666	4.05795	4.0604	3.75753	3.64747	4.66803	4.39531	4.44466	4.21879	4.21855	4.42226	4.43033	4.75331	4.66874	4.58494	4.45744	4.63018	4.53105	4.30344
ENSG00000100994	PYGB	4.1669	4.06779	3.75923	4.30102	3.67124	3.87676	4.02023	4.80592	4.47923	4.6449	4.35726	4.52294	4.57418	4.49174	4.87435	4.88976	4.8461	4.69832	4.48082	4.78256	4.60044
ENSG00000116127	ALMS1	4.1669	3.45103	4.01793	3.84538	4.19331	3.95626	3.88454	2.90742	3.0798	2.90375	2.8919	3.04936	2.85493	2.89349	2.81792	2.55285	2.86899	2.92366	2.71957	3.14926	2.74362
ENSG00000132718	SYT11	4.1669	4.20546	4.539	4.38803	4.42722	4.54714	4.46283	4.09037	3.98387	3.88955	4.27353	4.0372	4.43746	4.25864	4.14002	4.16005	3.79473	3.76742	4.01642	3.99284	3.9583
ENSG00000147421	HMBOX1	4.1669	3.6134	4.49431	4.12237	3.96323	3.99744	3.75007	2.21704	2.29688	2.694	2.60567	2.70244	2.22358	2.2072	2.51562	2.3356	2.88488	2.56901	2.56473	2.18194	1.91347
ENSG00000157020	SEC13	4.1669	4.50583	3.82839	4.25493	3.72053	3.90107	4.13552	5.58516	5.34428	5.03794	4.89994	4.8342	5.65034	5.36241	5.31715	5.28003	5.48115	5.294	5.14172	5.72256	5.44228
ENSG00000169871	TRIM56	4.1669	3.35633	3.85072	3.41543	3.75104	4.13365	3.41978	2.5216	2.70806	2.7019	3.19474	3.07988	2.9469	3.13743	2.44764	2.73216	2.66791	2.96283	2.98199	2.77648	2.7747
ENSG00000205250	E2F4	4.1669	3.83152	3.67663	4.14552	3.91785	3.57411	3.50802	4.81995	4.76689	4.5627	4.39997	4.59563	4.67196	4.83426	4.60617	4.49069	4.52917	4.5519	4.30936	4.69121	4.54101
ENSG00000257093	KIAA1147	4.1669	3.96053	3.3899	3.57228	3.47631	3.51442	3.56543	4.29608	3.49324	3.38917	2.87896	2.67415	2.89669	3.35002	5.06571	4.58509	4.64272	5.33547	4.81091	3.7669	4.49821
ENSG00000117385	P3H1	4.16333	4.19979	3.51823	3.76993	3.74672	3.72339	3.60176	5.01178	4.69349	4.67882	4.36723	4.70734	4.73801	4.68818	5.15368	5.05313	5.10239	5.00265	4.98215	4.87832	4.74866
ENSG00000145246	ATP10D	4.16333	4.22346	4.36374	4.54859	3.72053	4.46362	4.52426	2.61986	2.12888	2.52172	2.98634	3.29578	3.29262	2.52884	2.58871	1.47126	2.28652	2.60906	2.74835	2.26501	2.10727
ENSG00000147649	MTDH	4.16333	4.39009	4.64248	4.38608	4.25848	4.75708	4.46051	5.11058	5.51447	5.26253	5.45662	5.56476	5.62636	5.38459	4.88309	4.92343	4.70669	4.89984	4.76974	5.24671	5.34753
ENSG00000178950	GAK	4.16333	4.21223	3.94508	4.19628	3.94072	3.57613	3.72121	4.30718	4.1233	4.02166	3.90245	3.72054	4.03174	4.10124	4.22828	4.05859	4.38022	4.13421	4.1356	3.97803	3.69301
ENSG00000198677	TTC37	4.16333	4.635	4.57433	4.48649	4.10158	4.56653	4.60229	4.5396	4.77561	4.85565	5.00327	4.74182	5.00154	5.00364	4.82334	4.75191	4.79341	5.10457	4.97059	5.03432	5.31443
ENSG00000049245	VAMP3	4.15975	4.05402	4.34183	4.53024	4.25544	4.48844	4.42038	4.2072	4.41371	4.59434	4.65071	4.72537	4.20793	4.3377	4.30837	4.37606	4.23439	4.47109	4.42352	4.23681	4.4835
ENSG00000096060	FKBP5	4.15975	4.02481	3.84628	3.55509	2.70947	2.16008	3.2711	3.45992	3.38136	3.33051	3.56525	3.24283	3.66093	3.65178	3.04267	3.38704	2.93151	2.83526	2.17721	3.46415	3.00054
ENSG00000114978	MOB1A	4.15975	4.57581	4.97893	4.7118	4.82563	4.87307	5.041	4.28863	4.59034	4.70853	4.85436	4.76615	4.76819	4.50967	4.41729	4.52947	4.34404	4.27218	4.59377	4.61409	5.22163
ENSG00000119402	FBXW2	4.15975	3.64212	4.32279	4.22373	4.25544	4.51809	4.36798	3.54742	3.69725	3.77346	3.98677	4.5102	3.76722	3.87563	3.68185	3.82582	3.54394	3.45552	3.81551	3.65316	3.71835
ENSG00000154917	RAB6B	4.15975	2.04203	3.20811	2.74968	3.86701	4.65593	3.86532	-1.05702	-1.12773	0.0117636	0.961108	1.12864	0.426931	-0.189884	-0.317672	-2.30513	-0.428191	-1.83759	-0.584306	-0.920012	-1.54066
ENSG00000072501	SMC1A	4.15616	3.68009	3.96159	4.05551	4.02517	3.7014	3.92221	4.50337	4.44784	4.49156	4.87779	4.82265	4.99625	5.19081	4.22108	4.13332	4.33105	4.43923	3.90067	4.86847	4.70401
ENSG00000087253	LPCAT2	4.15616	3.78683	4.67538	4.37927	4.75857	5.57537	5.22491	3.13882	2.60864	3.16178	3.77846	3.84756	3.21279	3.16182	3.14453	2.12023	3.1819	3.2606	3.89939	3.06227	3.79107
ENSG00000188636	RTL6	4.15616	3.75161	3.5676	4.32656	3.9854	4.14319	4.07599	3.21626	3.25555	3.40135	3.41061	3.58731	3.19212	3.33535	3.61044	3.53594	3.38266	3.32934	3.33687	3.43358	3.34716
ENSG00000132670	PTPRA	4.15257	3.66535	4.00604	4.31334	4.46715	3.97624	4.00754	3.47706	3.07724	3.72389	3.28163	3.42703	3.19443	3.31103	3.68757	3.5057	3.48392	3.32814	3.66135	3.47555	3.23885
ENSG00000144136	SLC20A1	4.15257	3.73758	4.37919	3.92246	3.73804	4.2366	4.11644	5.03423	5.0954	5.15802	4.94056	5.49693	5.41991	5.49909	4.55602	4.74604	4.83898	4.44477	4.83426	5.3015	5.21921
ENSG00000148120	C9orf3	4.15257	3.72816	3.62055	3.86085	3.00542	3.62366	3.6878	1.08393	1.21299	1.74555	2.16533	1.96548	1.80967	1.48481	1.56096	1.13287	1.88586	1.44726	1.70275	1.20463	0.997404
ENSG00000150753	CCT5	4.15257	5.02769	3.71122	4.48195	3.67124	3.55381	3.77649	6.22925	6.25001	6.26428	6.15338	6.08981	6.42429	6.31213	5.94156	5.81227	5.9943	5.87696	5.43075	6.14729	6.0262
ENSG00000167258	CDK12	4.15257	3.92935	4.32916	4.26342	4.62374	4.01091	3.92559	4.52319	4.40045	4.38887	4.30291	4.45639	4.36493	4.33904	4.41039	4.0652	4.14898	4.15465	4.17642	4.29267	4.10524
ENSG00000212232	SNORD17	4.15257	7.58948	4.99104	5.00229	5.45991	5.06392	4.08205	3.29124	3.53305	2.71562	2.99836	3.20379	3.79108	2.9506	3.68757	4.42316	3.54394	3.9097	3.97926	3.69974	3.99395
ENSG00000002549	LAP3	4.14896	5.07926	3.98601	4.64839	3.90239	4.42948	4.42754	3.38923	3.49131	3.65638	3.8701	3.7233	3.63734	3.563	3.4358	3.27413	3.17707	3.0527	4.11696	3.27576	3.3735
ENSG00000068971	PPP2R5B	4.14896	4.12755	3.88575	4.51076	4.36377	4.44058	4.01706	2.23885	1.61749	2.33877	2.18951	1.67701	2.15404	1.83118	2.50703	1.93869	2.21919	2.15566	2.37659	1.53864	1.50418
ENSG00000101152	DNAJC5	4.14896	4.46292	3.20117	4.02712	3.93693	3.97929	4.112	5.24098	4.96771	5.0024	5.17841	5.03886	5.36762	5.1179	5.22845	5.22793	4.9797	5.02354	4.93941	5.21207	5.13248
ENSG00000128512	DOCK4	4.14896	4.46953	4.26409	3.65848	3.34532	3.94851	4.39503	5.57784	5.45304	5.5774	4.73113	4.83292	4.43892	5.01957	5.75705	5.6533	5.89925	5.87286	5.93777	5.38204	5.62613
ENSG00000132155	RAF1	4.14896	4.43519	4.06836	4.44325	4.3917	4.11852	4.13698	4.43483	4.24017	4.43995	4.42564	4.39532	4.48637	4.41899	4.27901	4.2639	4.32524	4.16476	4.23759	4.51457	4.40671
ENSG00000137166	FOXP4	4.14896	1.79362	4.01002	4.04693	3.35102	3.72883	3.2948	2.34897	1.91594	2.28193	1.94523	3.09276	1.72268	1.96539	2.12431	2.42939	1.9171	1.49933	1.69981	1.44564	1.14966
ENSG00000167778	SPRYD3	4.14896	3.57537	3.31478	3.36504	3.07598	3.40758	3.47152	2.88388	2.776	2.86909	2.6928	3.07988	2.83136	2.90618	2.75035	3.0236	2.84888	2.6728	2.88682	2.85964	2.75257
ENSG00000140632	GLYR1	4.14534	3.86631	3.79192	4.08214	3.78092	3.64109	3.51027	4.3791	4.12082	4.18063	4.02421	4.18687	4.13341	4.2083	4.3468	4.3187	4.18391	3.96167	4.05437	4.19111	4.06988
ENSG00000160007	ARHGAP35	4.14534	3.75779	3.84628	3.73526	4.11839	4.14183	4.29545	4.263	3.88478	3.88695	4.18838	4.29485	4.19472	4.0758	4.34016	4.31712	4.14734	4.03773	3.99196	4.06632	3.81405
ENSG00000011454	RABGAP1	4.14172	3.78532	4.48292	4.33162	3.92551	4.25935	4.11792	3.3554	2.87669	2.9476	3.01198	3.26955	2.79375	2.77991	3.10094	3.26431	3.1803	3.11104	2.93519	2.70632	2.30471
ENSG00000138604	GLCE	4.14172	4.17109	4.90402	5.23214	4.32083	4.89906	4.45818	4.46555	4.65535	4.56703	4.97312	5.13124	4.73642	4.81901	5.02227	4.88656	4.61561	4.67115	5.06199	4.97416	5.43859
ENSG00000143418	CERS2	4.14172	4.08757	3.99405	4.23349	3.68485	4.00494	4.1601	4.04156	4.1853	3.95464	4.11456	4.36201	4.25242	4.2894	3.82269	3.83137	3.85646	3.45662	3.61834	3.97975	3.91712
ENSG00000162923	WDR26	4.14172	3.87202	4.94196	4.30514	6.62639	4.40928	4.48589	4.08436	4.12826	4.08947	4.07294	4.49734	3.86983	3.99497	4.18651	4.43779	3.85545	4.15803	4.41905	3.97803	4.06809
ENSG00000049656	CLPTM1L	4.13808	4.55286	3.46131	3.98154	3.64363	3.61976	3.90178	4.44291	4.54284	4.49781	4.58161	4.67629	4.78515	4.76531	4.3564	4.26882	4.2398	4.19073	4.1285	4.47251	4.48306
ENSG00000056586	RC3H2	4.13808	4.05779	4.36684	4.16604	4.57828	4.54406	4.72751	4.02999	3.97426	4.18204	4.31188	4.31698	4.06937	4.05804	4.27142	4.04909	3.96599	4.18411	4.32617	4.08292	4.23593
ENSG00000116237	ICMT	4.13808	4.21673	3.60487	4.16377	3.6575	3.82686	4.07142	4.70264	4.71095	4.96226	5.33357	5.44514	5.2172	5.10891	4.6859	4.4709	4.44661	4.28274	4.36572	4.93782	5.03165
ENSG00000123684	LPGAT1	4.13808	4.41673	4.18895	4.08694	4.17414	4.34928	4.42158	3.3611	3.58989	3.89301	4.0107	4.04385	3.85894	3.75056	3.58514	3.5629	3.31098	3.71883	3.81687	3.73744	4.11221
ENSG00000133961	NUMB	4.13808	3.47188	3.87707	3.86085	3.75964	3.694	3.29218	4.86522	4.15037	4.43581	3.87663	4.38488	4.08378	4.00511	4.68923	4.50466	4.40659	4.1533	4.21714	4.1807	3.85547
ENSG00000162618	ADGRL4	4.13808	3.28313	4.34498	3.91034	3.15634	4.16209	3.55238	4.74789	5.28887	4.93362	4.8146	5.31744	4.53506	5.143	5.10646	5.32127	4.60186	5.10492	5.26735	5.12606	5.92002
ENSG00000167491	GATAD2A	4.13808	3.6438	3.72095	4.15467	4.0777	3.68656	3.61437	5.13488	4.91415	4.95815	4.69728	5.15293	4.9152	5.0415	4.93807	4.80198	4.81844	4.49051	4.29236	4.84825	4.53108
ENSG00000172985	SH3RF3	4.13808	3.05841	3.23552	3.86922	3.11001	3.20374	3.37849	2.11627	2.22462	2.24996	1.91655	2.07339	1.63351	1.43565	2.29376	2.46413	2.28353	1.73113	1.71155	2.08319	2.07673
ENSG00000184787	UBE2G2	4.13808	3.59451	3.8057	3.81539	3.59159	3.64877	3.73089	4.08951	4.10203	4.01613	4.0971	4.33697	3.99774	4.24229	3.9222	3.88576	3.9224	3.69111	3.69501	4.05225	4.04643
ENSG00000198898	CAPZA2	4.13808	5.08727	5.36141	4.58207	4.33528	5.34957	5.0135	4.29161	4.76131	4.59805	5.22044	5.09115	5.0648	4.52149	4.16619	4.52605	3.96038	4.5999	5.00349	4.69365	5.09984
ENSG00000204394	VARS	4.13808	3.2128	3.05495	3.32301	3.14981	2.96628	3.11718	5.0244	4.9684	4.80107	4.55743	4.90164	4.64518	4.89508	4.74328	4.89613	4.91541	4.22657	3.68834	4.68911	4.17345
ENSG00000111321	LTBR	4.13444	4.03376	3.94922	3.84397	3.79772	3.4609	3.55892	4.25538	4.22982	4.08797	4.3745	4.05924	4.90923	3.97704	4.31145	4.18629	4.02004	4.21688	4.05668	4.67435	3.65534
ENSG00000119787	ATL2	4.13444	4.00153	4.79307	4.12819	4.34959	5.14149	4.98303	2.45394	2.78231	2.85676	3.18726	3.11818	3.2105	2.94182	2.12711	2.3604	2.39589	2.75899	2.61873	3.0016	3.27241
ENSG00000173530	TNFRSF10D	4.13444	5.20631	5.02286	4.77179	4.04992	4.83824	5.62298	6.35317	5.57974	5.29521	4.43262	4.20082	5.14166	5.01748	6.16012	5.72636	5.34565	5.51008	5.27602	5.765	5.59641
ENSG00000082898	XPO1	4.13079	4.69991	5.14896	4.55725	4.83787	4.83319	4.78162	4.76517	5.39917	5.21398	5.65925	5.6873	5.49496	5.27881	4.73226	4.98152	4.60306	5.05505	5.0304	5.22998	5.60796
ENSG00000148143	ZNF462	4.13079	2.49892	3.96159	3.5254	3.81432	3.62171	3.53701	2.6151	2.7633	2.5999	2.26253	2.5551	1.92827	2.54051	2.76844	2.22857	2.78682	2.76963	2.12109	1.95174	1.97846
ENSG00000159202	UBE2Z	4.13079	4.27183	4.15705	4.39963	3.99271	4.09903	4.37046	4.09379	4.13567	4.25768	4.25647	4.5086	4.26787	4.28871	4.27649	4.4436	4.17263	3.97245	4.22893	4.47291	4.34938
ENSG00000168918	INPP5D	4.13079	3.49244	3.52935	3.10417	4.11169	3.14251	2.88019	3.92531	3.54978	3.57592	2.94434	3.08418	2.81343	2.93299	4.05488	3.9143	3.96038	4.06535	3.70532	3.09643	3.04613
ENSG00000213853	EMP2	4.13079	4.03504	5.15615	5.45372	4.32373	5.02241	4.6612	1.94866	2.43938	3.03462	3.20218	3.44053	2.61033	2.62187	1.18348	1.35269	1.82952	1.98658	2.47803	2.27623	2.05036
ENSG00000115091	ACTR3	4.12713	5.46505	4.9769	4.65486	4.84395	4.71838	4.92769	5.49417	5.9403	5.83503	6.12918	6.07366	6.06724	5.9655	5.50203	5.67292	5.42386	5.4402	5.55631	5.93966	6.27649
ENSG00000124788	ATXN1	4.12713	4.09615	4.32279	4.17056	4.93218	4.77999	4.76569	2.39132	2.34027	2.52172	2.3669	2.49167	2.36159	2.25049	2.96322	2.7369	2.86299	2.68597	3.30622	2.62382	2.78926
ENSG00000125845	BMP2	4.12713	3.89467	4.10598	4.50809	4.45925	3.28729	4.67531	3.09507	3.09001	3.51445	4.31119	3.72881	3.8531	3.51884	3.1236	2.59525	2.56073	1.77051	2.42731	2.53476	2.17982
ENSG00000163697	APBB2	4.12713	3.90167	4.29048	4.20402	4.04641	3.95626	3.98829	5.26926	5.01534	4.82116	4.4897	4.28179	4.53506	4.53673	5.54832	5.19385	5.65739	5.49546	5.42653	5.15142	5.27823
ENSG00000204287	HLA-DRA	4.12713	4.7628	1.44672	3.82545	3.66667	2.59711	3.60598	-6.04192	-4.73654	-7.81478	-0.901708	-3.13606	-5.28535	-5.41485	-7.87991	-7.51459	-7.62786	-7.90368	-6.6504	-8.32089	-6.58505
ENSG00000073578	SDHA	4.12346	3.667	3.4379	3.684	3.29887	3.85535	3.78022	4.80383	4.37772	4.66575	4.38631	4.3549	4.55678	4.44841	4.68447	4.58048	4.79183	4.61227	4.55152	4.53105	4.26644
ENSG00000083857	FAT1	4.12346	5.03981	2.55405	3.17112	4.51111	4.03455	4.35552	0.954321	1.09635	1.44496	0.226481	-1.02059	-0.0647993	1.95497	2.24032	2.04956	3.01689	2.44615	1.24644	0.881232	2.23406
ENSG00000100241	SBF1	4.12346	4.29222	3.58369	4.18292	3.76392	4.01834	3.79137	4.85012	4.55486	4.61122	4.44396	3.99437	4.66072	4.65956	4.67922	4.70428	4.94649	4.81592	4.56736	4.5989	4.41659
ENSG00000146278	PNRC1	4.12346	3.98975	5.13992	4.45349	5.55562	4.64829	4.6336	2.79203	2.44734	2.66802	2.3266	2.1411	1.99343	1.66197	3.27933	3.51815	3.07344	3.04979	3.56837	2.36298	2.46389
ENSG00000178974	FBXO34	4.12346	3.9211	4.51403	5.01993	3.76392	4.12816	4.24498	2.32003	2.13875	2.22001	2.63016	2.57971	2.59467	2.20427	2.29376	2.26185	2.46357	2.39896	2.29894	2.19185	2.05519
ENSG00000198837	DENND4B	4.12346	2.85119	3.50139	3.04877	3.44998	2.96628	2.93818	3.40034	3.13997	3.45376	3.0782	3.34686	3.05259	3.44251	3.31546	3.30639	3.71254	3.3823	3.26797	3.22745	2.89809
ENSG00000012232	EXTL3	4.11978	4.25989	3.34656	3.67289	3.65289	3.57007	3.75956	4.48849	4.15767	4.46512	3.84274	3.71777	3.85384	3.79898	4.51428	4.51505	4.59403	4.61767	4.45005	4.19308	4.29632
ENSG00000164050	PLXNB1	4.11978	4.03376	3.22872	3.61104	2.5401	3.21413	3.45759	3.25194	2.70474	2.64362	2.18049	1.69964	2.60165	2.94006	3.55628	3.52228	3.50078	3.60163	3.3678	3.16845	3.33232
ENSG00000177463	NR2C2	4.11978	3.5841	3.84628	3.93977	4.05343	4.0807	3.59965	3.60734	3.35198	3.78745	3.48939	3.75606	3.2162	3.43377	3.5831	3.5209	3.99921	3.69111	3.56595	3.52028	3.48954
ENSG00000092847	AGO1	4.11609	3.51636	3.3899	3.78917	4.0777	4.07928	4.10903	4.17119	3.91379	4.005	3.9332	4.19485	3.85457	3.67314	4.23675	4.19579	4.18632	4.13009	3.97196	4.10668	3.83946
ENSG00000100979	PLTP	4.11609	2.32228	4.62185	4.70558	4.52631	4.4439	3.9035	2.78357	2.80106	2.49923	2.54138	2.70244	2.77535	2.23333	2.76123	2.75337	2.81404	2.78194	3.18408	2.56404	2.0161
ENSG00000109756	RAPGEF2	4.11609	4.04012	4.71974	4.47831	4.6701	4.07216	4.50746	4.12843	4.16854	4.23336	4.33373	4.23994	4.28315	4.07981	4.57516	4.18802	4.23903	4.60188	4.26523	4.26007	4.23433
ENSG00000125944	HNRNPR	4.11609	3.91557	4.4126	4.27606	3.47631	3.91706	3.90007	4.64604	4.87116	4.50065	4.78219	4.79927	4.76236	4.88321	4.19188	4.44723	4.34044	4.26405	4.10366	4.68104	5.04719
ENSG00000139182	CLSTN3	4.11609	4.84066	4.25742	4.27711	4.50089	3.7014	4.12234	3.1877	2.31874	2.54606	1.77597	1.76547	1.69029	1.93033	3.9222	3.89321	3.58463	3.3961	3.36223	1.76259	2.01362
ENSG00000146463	ZMYM4	4.11609	3.98184	4.32279	4.15695	4.21536	4.42725	4.07751	4.03712	4.11708	4.21208	4.29457	4.47455	4.17086	4.13166	4.2922	4.02409	3.91372	4.19665	4.17959	4.13623	4.0561
ENSG00000166974	MAPRE2	4.11609	3.20149	4.63735	4.35762	4.64942	4.2768	4.22045	4.8592	5.08332	4.84855	5.22337	5.48232	5.153	5.07399	4.63554	4.68294	4.92601	4.73543	4.59931	4.85855	4.66742
ENSG00000205356	TECPR1	4.11609	4.09981	3.54038	3.93047	3.50728	3.7874	3.78395	4.20878	3.77046	4.06135	3.62407	3.19186	3.47952	3.68371	4.29782	4.48928	4.48751	4.47813	4.64633	3.89555	4.05006
ENSG00000004455	AK2	4.11239	4.29754	3.778	4.43294	3.42857	3.53528	3.72703	4.68231	4.6398	4.75246	4.55975	4.48273	4.79089	4.59498	4.58998	4.14407	4.39207	4.31216	4.067	4.49349	4.34199
ENSG00000066933	MYO9A	4.11239	3.96989	4.297	4.24532	4.15471	4.43282	4.35927	2.79413	2.58719	3.02678	2.93006	2.752	2.56996	2.80915	2.94425	2.6288	3.16574	3.08429	3.18091	2.86584	2.86547
ENSG00000079691	CARMIL1	4.11239	3.79738	5.05591	5.39698	4.14161	4.56145	4.65206	1.52541	1.50758	2.95423	2.4342	2.23704	1.94484	0.946216	0.943453	1.18238	1.45695	2.12561	2.50358	0.810965	0.640558
ENSG00000099194	SCD	4.11239	3.25059	4.15346	4.11535	2.9688	3.30197	3.61437	5.368	5.55325	6.56628	4.8866	5.69788	5.89162	5.0852	4.7034	4.91508	5.54909	5.38878	6.19123	5.76781	5.0978
ENSG00000125089	SH3TC1	4.11239	5.30786	3.38379	4.55552	2.86103	3.55381	3.42933	4.86572	4.74526	4.32445	4.20181	3.96664	4.77283	4.38508	4.94246	5.12769	4.95498	4.68199	4.86711	4.70338	4.51232
ENSG00000131143	COX4I1	4.11239	5.10497	3.98196	4.47192	4.30329	4.48523	4.70313	4.99174	4.81843	4.70461	4.48665	4.33516	4.81362	4.75783	4.94405	4.9177	4.94838	5.11295	4.89505	5.00708	4.8817
ENSG00000138071	ACTR2	4.11239	3.98712	4.73902	4.04693	4.55129	4.4483	4.59064	4.69927	4.83824	4.8902	5.33357	5.6442	4.90218	5.14491	4.63406	5.06024	4.40177	4.44366	4.28305	4.73185	4.88374
ENSG00000163812	ZDHHC3	4.11239	3.80338	3.64631	4.22047	3.84293	3.92023	3.75197	3.7756	3.63415	3.7268	3.50633	3.89736	3.65171	3.55151	3.7251	3.64844	3.54394	3.27436	3.70826	3.60206	3.49221
ENSG00000171621	SPSB1	4.11239	4.05402	3.15884	4.14552	3.20123	3.52697	3.92896	3.05524	2.66092	2.39345	2.20144	1.89858	2.27689	2.44686	3.48367	3.33012	2.74173	3.0527	2.44851	3.17746	3.45158
ENSG00000085832	EPS15	4.10868	4.31233	4.38226	4.47192	4.34389	4.38879	4.47556	3.59652	3.43037	3.6057	3.69649	3.69823	3.64918	3.39186	3.59125	3.34417	3.49432	3.68363	3.52993	3.45348	3.64977
ENSG00000103479	RBL2	4.10868	4.16761	4.38838	4.35663	4.4191	4.49485	4.31231	2.81295	2.96528	3.27201	3.03049	2.98633	3.03335	2.78384	3.19623	3.29839	3.38406	3.6855	3.56433	3.21972	3.13776
ENSG00000105939	ZC3HAV1	4.10868	3.69145	4.15346	4.4159	4.93598	4.05058	4.07902	4.07313	4.27748	4.40105	4.17634	4.37964	3.99774	4.09255	4.05267	3.9122	4.24289	3.95236	3.93112	3.88093	3.87199
ENSG00000115486	GGCX	4.10868	3.81678	4.07596	3.55509	3.78092	3.76284	3.48989	3.2458	3.01968	3.11225	3.24318	3.52532	3.5579	3.24408	3.31792	3.28551	3.54018	3.2966	3.59159	3.33955	3.1423
ENSG00000121774	KHDRBS1	4.10868	3.23736	4.57164	3.50943	4.03583	4.21736	4.22045	4.49174	4.50901	4.19469	4.55162	4.86707	4.15552	4.51618	4.1892	4.71092	4.13576	4.00133	3.6199	4.3702	4.00772
ENSG00000175274	TP53I11	4.10868	2.75238	4.53073	3.68716	3.54757	3.99744	3.37108	4.16143	4.0056	4.32317	3.46979	3.70943	3.10513	3.01393	4.27142	4.35076	4.10048	3.70226	4.01701	3.2832	3.50991
ENSG00000196262	PPIA	4.10868	5.05622	3.66155	4.35067	3.85903	4.01686	4.2797	5.5432	5.35912	5.5396	5.543	5.31286	5.52923	5.49249	5.56394	5.487	5.76754	5.62416	5.49501	5.75149	5.7192
ENSG00000063244	U2AF2	4.10496	3.92798	3.82388	3.96341	3.57706	3.84368	3.61228	4.98806	4.96147	4.72122	4.86049	5.0455	4.98595	5.08957	4.67683	4.77515	4.64156	4.41345	4.38784	4.94252	4.66742
ENSG00000071073	MGAT4A	4.10496	4.15828	4.47719	4.01962	4.27056	4.66826	4.66019	3.49141	3.69391	4.24692	4.03592	4.48436	3.6073	3.85801	3.86534	4.00259	3.67192	3.61448	3.85575	3.91542	4.63794
ENSG00000116786	PLEKHM2	4.10496	3.25497	3.79653	3.84538	3.52252	3.49538	3.66373	3.80096	3.36254	3.39162	3.57331	3.89	3.41855	3.68896	3.68662	3.96267	3.56381	3.22625	3.11834	3.33866	2.82222
ENSG00000148484	RSU1	4.10496	4.20998	3.94092	4.05551	4.27956	3.54354	3.99151	4.20641	4.11333	4.16999	4.00391	3.97594	4.18545	4.09413	4.2947	4.027	4.06693	3.67893	3.69279	3.97631	3.86856
ENSG00000155363	MOV10	4.10496	3.37255	4.40658	4.05917	3.11672	3.2971	3.12013	3.66256	3.55532	3.53117	3.54782	3.77483	3.4566	3.29044	3.75988	3.67462	3.90693	3.63596	3.75297	3.45924	2.91811
ENSG00000183495	EP400	4.10496	2.12096	3.66155	3.19351	3.99635	3.27742	3.12013	3.27926	3.35622	3.01097	2.96199	3.71499	2.45322	3.27794	2.93947	3.26759	3.47346	2.76786	1.99946	2.90251	2.11192
ENSG00000255302	EID1	4.10496	5.05182	5.19682	4.80634	4.52379	4.98726	5.40322	3.98091	4.62847	4.02166	4.68458	4.16264	4.78745	4.5541	3.85606	4.56989	3.78418	4.1661	4.61072	4.48908	5.27849
ENSG00000023516	AKAP11	4.10123	3.85047	4.61925	4.28025	4.61902	4.53061	4.69028	2.89177	3.31331	3.46425	3.49425	3.55975	3.06148	3.43627	3.08226	3.21078	3.16736	3.43338	3.00722	3.1298	3.75961
ENSG00000084090	STARD7	4.10123	4.22122	3.6666	4.5063	4.34102	4.51599	4.48817	5.20106	5.0973	5.07186	5.34639	5.36511	5.52327	5.2136	5.00635	5.03014	5.08703	5.09544	5.08191	5.26536	5.3023
ENSG00000087087	SRRT	4.10123	3.67846	3.5996	3.67925	3.30476	3.2922	3.01944	4.57494	4.33974	4.02087	4.25647	4.20478	4.42176	4.68239	4.19322	4.22899	4.19192	4.18212	3.93488	4.27646	4.16844
ENSG00000106052	TAX1BP1	4.10123	4.55197	4.61665	4.75081	5.14243	4.84159	4.85074	3.78198	3.74162	3.70731	3.86636	4.04163	3.94518	3.70253	3.9222	3.81241	3.234	3.84744	3.95416	3.82917	3.92109
ENSG00000125827	TMX4	4.10123	3.41428	4.50561	4.32352	3.99635	4.26436	4.10755	2.58865	2.46705	2.74459	3.21107	3.43716	3.11003	3.05845	2.59278	2.49804	2.23477	2.61694	2.77936	2.96046	3.19248
ENSG00000127418	FGFRL1	4.10123	3.03057	3.89007	4.3164	3.69833	3.99594	4.02338	3.37523	3.51801	3.73356	3.47349	3.71777	3.1898	3.68266	3.37334	3.19191	3.59795	3.32092	3.05178	3.25133	2.98796
ENSG00000131435	PDLIM4	4.10123	4.67233	5.05399	5.41089	3.22626	3.86856	4.24634	3.75087	3.84013	4.15352	3.63731	3.74522	3.61853	3.79216	3.84247	4.00259	3.91178	3.40977	3.39991	3.75893	3.26722
ENSG00000161714	PLCD3	4.10123	2.74305	3.58901	4.03458	3.51238	4.01537	3.75766	1.58014	1.52273	1.87696	2.14075	2.62179	2.09341	1.62736	1.99199	2.21504	1.89374	1.65283	2.27343	1.98631	1.47564
ENSG00000204525	HLA-C	4.10123	5.52886	4.49997	6.23281	6.03362	4.65973	4.72945	2.19808	2.17754	4.26903	2.65207	2.52374	4.16144	2.32796	2.63677	2.83966	4.4446	2.73204	3.31491	3.83551	1.96056
ENSG00000109193	SULT1E1	4.09749	5.135	5.31879	4.69542	2.89265	4.87716	4.46979	1.3009	2.60509	0.86821	4.49274	4.47783	4.73126	3.29182	-1.05974	-2.30513	-6.0429	0.101944	-0.834479	2.7909	0.129194
ENSG00000135018	UBQLN1	4.09749	4.25879	4.46276	4.38803	4.88383	4.27804	4.20247	4.74571	4.84804	4.91037	4.94456	5.18937	5.03061	4.85498	4.61419	4.58378	4.52727	4.49159	4.33663	4.69261	4.60868
ENSG00000062485	CS	4.09375	3.71709	3.58901	3.98795	3.84698	3.87512	3.84763	5.0807	5.15129	5.17798	5.19082	5.50418	5.28735	5.18115	4.89054	4.83165	5.09984	4.73815	4.76552	5.16607	4.84244
ENSG00000065883	CDK13	4.09375	3.7485	3.76395	3.8803	3.94826	3.90428	3.94069	3.61332	3.75451	3.52785	3.35025	3.32882	3.40365	3.655	3.7186	3.53458	3.78735	3.80583	3.58442	3.59536	3.52652
ENSG00000116604	MEF2D	4.09375	3.42793	4.49997	4.28234	4.16122	3.91387	4.29675	3.0482	3.1102	2.71952	2.39835	2.69683	2.4141	2.53585	3.3543	3.33326	2.93151	3.19764	3.24896	2.90371	2.7585
ENSG00000142186	SCYL1	4.09375	3.80637	3.58901	4.0146	3.58192	3.71975	3.93064	4.43685	4.46558	4.36481	4.05084	4.18085	4.51947	4.45767	4.24259	4.08858	4.44929	4.11417	4.06585	4.24016	3.86169
ENSG00000157110	RBPMS	4.09375	3.31076	3.30187	3.60438	2.98356	3.22701	3.14061	1.6973	1.20362	1.52729	1.31977	2.02044	1.33146	1.40021	1.6573	1.28955	1.49367	0.813996	0.97653	1.28088	0.505943
ENSG00000175387	SMAD2	4.09375	4.47047	5.17575	4.90798	5.08371	5.03784	4.98384	4.05831	4.36832	4.33401	4.46886	4.43969	4.50744	4.18395	4.13306	4.17498	4.11739	4.32844	4.40556	4.36144	4.52369
ENSG00000095951	HIVEP1	4.08999	3.19466	3.2757	3.91169	3.98906	3.58816	3.63721	2.99792	3.23959	3.10631	2.82018	3.13488	2.92341	3.18729	3.02923	2.61083	3.19789	3.02187	2.97592	3.28783	2.97655
ENSG00000116251	RPL22	4.08999	4.97023	4.73902	4.5425	4.76499	5.02389	5.16974	4.09721	4.0029	4.09023	4.15961	3.89736	4.2945	3.96756	3.73618	3.9657	3.89912	4.27031	4.22535	4.26478	4.33356
ENSG00000186566	GPATCH8	4.08999	2.97322	3.95335	3.92111	3.99999	3.57411	3.39076	3.23343	3.15463	3.32413	3.00688	3.13903	2.95918	3.081	3.2029	3.13916	3.13949	3.21721	3.33782	3.13083	2.9234
ENSG00000125817	CENPB	4.08622	4.39108	3.37765	4.12237	3.58676	3.98233	4.08357	4.47674	4.44088	4.36295	4.74495	4.4811	4.93088	4.77621	4.33835	4.58969	4.25974	4.23171	4.22023	4.74065	4.64317
ENSG00000140262	TCF12	4.08622	3.81084	4.31317	4.14552	4.2028	4.14183	3.91713	4.32986	4.45279	4.45988	4.18838	4.56669	4.26622	4.32088	4.49322	4.44867	4.60965	4.56774	4.62321	4.54658	4.52978
ENSG00000168439	STIP1	4.08622	4.73406	3.39599	4.01208	3.3567	3.52071	3.29218	5.82498	5.84898	5.65116	5.52441	5.60128	5.83849	5.75094	5.43084	5.44487	5.71435	5.22447	5.06571	5.63285	5.38278
ENSG00000171863	RPS7	4.08622	5.44457	4.4126	4.46089	4.49832	4.71015	4.85518	5.085	5.1998	5.01712	5.0776	4.94135	5.23358	5.14185	4.92965	5.23172	5.20522	5.23667	5.17257	5.34122	5.29823
ENSG00000054523	KIF1B	4.08245	3.46812	3.68163	3.92914	4.11505	4.16879	3.95066	4.02372	3.938	4.03266	4.00476	4.61957	3.76021	3.96756	4.18853	4.01826	4.11739	3.90085	3.92041	3.8145	3.82257
ENSG00000059378	PARP12	4.08245	3.22402	3.53487	4.01208	3.43932	3.67156	3.55674	3.37382	3.31982	3.47235	3.20515	3.22344	3.35283	2.92233	3.92462	3.39155	3.65349	3.28676	3.24291	3.4576	3.15585
ENSG00000065809	FAM107B	4.08245	3.14359	4.83176	4.27501	5.08371	4.44169	4.23141	4.88265	4.77482	4.6718	5.09729	5.5778	5.05434	4.80746	4.6306	4.90774	4.29509	4.18146	4.35359	4.94252	4.6242
ENSG00000067208	EVI5	4.08245	3.63037	4.37919	4.40539	4.10833	4.52019	4.47901	2.55427	2.62978	3.15172	3.85413	3.89736	3.89633	3.34737	2.86576	2.7369	2.76553	3.0381	2.7877	3.15231	2.89001
ENSG00000067596	DHX8	4.08245	4.05024	3.65141	3.95819	3.44466	3.67908	3.4876	3.96418	3.78624	3.83402	3.67204	3.77749	3.79946	3.78727	4.05341	3.86533	4.00921	4.1037	3.89811	4.01366	3.9098
ENSG00000122863	CHST3	4.08245	3.90027	3.00006	3.9411	3.72493	4.09903	3.48532	2.46191	2.37407	2.14087	3.32728	3.49005	3.5197	3.64854	2.47213	2.10196	1.8005	2.15837	1.78562	2.98346	2.45295
ENSG00000159069	FBXW5	4.08245	4.56438	3.57298	4.11418	3.72493	3.91865	3.74434	4.67204	4.58313	4.59805	4.41286	4.0372	4.73325	4.74174	4.72765	4.59818	4.6532	4.55447	4.5621	4.66584	4.47091
ENSG00000177963	RIC8A	4.08245	4.23126	3.6412	4.22047	3.81019	3.76638	3.98667	4.8007	4.58223	4.71538	4.72494	4.72812	4.76741	4.81709	4.66046	4.48436	4.4836	4.30547	4.39332	4.6701	4.43523
ENSG00000185737	NRG3	4.08245	2.23626	3.99806	3.13225	2.98356	3.16945	2.8662	1.22174	0.889897	0.110028	0.925572	1.37349	0.652129	1.11809	2.18752	1.95098	1.21449	1.66428	0.87055	0.0584866	0.519984
ENSG00000029364	SLC39A9	4.07866	4.40889	4.20638	4.52848	4.38616	4.53787	4.67932	4.05568	3.95903	3.92879	4.19437	3.98748	4.07816	3.95278	3.88786	3.89746	3.57365	3.90408	4.07042	3.93266	4.20149
ENSG00000115415	STAT1	4.07866	3.55951	5.00505	4.89915	4.44333	4.8632	4.85252	3.93298	3.71054	3.49753	4.05084	4.36201	3.95203	3.35532	3.8862	3.68202	3.46819	3.50199	4.25975	3.39121	3.26096
ENSG00000127054	INTS11	4.07866	3.41428	3.49005	3.87754	3.17575	3.33567	3.32324	4.12508	4.20068	4.14485	3.83414	3.82972	3.87127	4.07017	4.29532	4.02409	4.25974	3.96089	3.88973	3.93266	3.86856
ENSG00000141985	SH3GL1	4.07866	3.75779	3.74976	3.872	3.5964	3.55789	3.62063	4.88611	4.78506	4.57941	4.22976	4.73087	4.51532	4.60669	4.85881	4.76241	4.54924	4.43978	4.3489	4.66584	4.48753
ENSG00000143970	ASXL2	4.07866	3.18551	3.778	3.85103	4.0429	3.74325	3.75387	3.56726	3.54608	3.67456	3.47349	3.80645	3.31722	3.5492	3.47489	3.37644	3.87646	3.53147	3.36873	3.41762	3.20557
ENSG00000163956	LRPAP1	4.07866	4.67479	3.65141	4.19739	3.60597	3.99292	4.07295	4.50915	3.91523	4.01533	3.9161	3.72881	4.1454	4.07419	4.50999	4.23403	4.23051	4.25461	4.25574	4.18566	4.02997
ENSG00000234741	GAS5	4.07866	4.60699	4.09105	4.00577	3.98172	4.40589	4.14424	3.84936	4.49564	3.98085	4.44898	4.31881	4.27934	4.37403	3.79295	4.06332	4.15391	4.31033	4.35499	4.26101	4.69437
ENSG00000113282	CLINT1	4.07486	4.21561	4.21329	4.41685	3.76392	3.73426	3.83691	4.35718	4.25611	4.61227	4.35793	4.54185	4.45347	4.47359	4.31269	4.15563	4.18872	3.96861	4.09248	4.25299	4.26435
ENSG00000138768	USO1	4.07486	4.58628	4.75805	4.61975	4.27956	4.70463	4.80747	4.14006	4.48601	4.56107	4.61713	4.47127	4.67569	4.33904	4.05856	4.0895	4.04942	4.45854	4.49787	4.26993	4.50969
ENSG00000156052	GNAQ	4.07486	3.59451	4.80684	4.28025	4.84192	4.61437	4.54855	3.58075	3.60063	3.71123	4.01916	4.26102	3.81906	3.88573	3.68376	3.43597	3.18351	3.51259	3.88066	3.69278	4.02505
ENSG00000177733	HNRNPA0	4.07486	3.17399	4.33551	3.54294	4.01802	4.11575	4.50971	3.79466	3.84164	3.47466	4.07212	4.18687	3.51416	4.12934	3.67611	4.46305	3.08724	3.02039	2.74121	3.75492	3.59776
ENSG00000196776	CD47	4.07486	4.12396	5.10505	4.46365	4.61192	4.64061	4.75149	2.1885	2.62978	3.14159	3.54197	3.75065	3.05768	2.71134	2.28122	2.43232	2.41243	2.47461	3.1326	2.68122	2.89271
ENSG00000065613	SLK	4.07106	4.86093	4.9357	5.17703	4.53134	4.72838	4.8684	3.99471	4.2493	4.57565	4.58674	4.52611	4.54686	4.5437	4.07465	4.02215	4.08079	4.41175	4.26474	4.4619	4.70746
ENSG00000108100	CCNY	4.07106	4.2986	4.57433	4.57185	4.34389	4.56957	4.42516	4.3529	4.26852	4.27102	4.23558	4.37788	4.10359	4.14395	4.43382	4.34378	4.20621	4.01406	4.41188	4.17821	4.27629
ENSG00000132128	LRRC41	4.07106	3.72816	3.66155	3.90764	3.4123	3.62949	3.55019	4.3854	4.19715	4.31289	4.10347	4.21855	4.35102	4.34437	4.47075	4.23988	4.46984	4.43031	4.36293	4.49509	4.10756
ENSG00000141068	KSR1	4.07106	4.00674	3.84183	3.57228	3.59159	3.44995	3.21425	3.255	3.28249	2.9476	3.18275	3.08418	3.18749	3.06655	2.90063	2.74868	3.41585	3.16845	2.96124	3.09959	2.67783
ENSG00000100258	LMF2	4.06724	3.59105	3.86396	4.03829	3.78092	3.62561	3.74051	3.97257	4.11083	3.9986	4.12947	4.13592	4.16321	4.27759	4.11903	4.12792	3.93581	3.7343	3.84779	4.10196	3.80762
ENSG00000101290	CDS2	4.06724	3.78077	3.6866	4.02213	4.44333	4.47447	4.48474	4.12759	3.70889	3.84209	3.78442	3.82201	3.90976	3.7354	4.2309	3.96368	3.72142	3.7234	3.89939	3.78076	3.64337
ENSG00000102181	CD99L2	4.06724	4.22122	4.02581	4.48831	3.97435	4.38765	4.43349	3.53236	3.16674	3.33051	3.13532	2.73567	2.88386	3.19765	3.87706	3.73037	3.58463	3.70596	3.44895	3.35991	3.28171
ENSG00000138095	LRPPRC	4.06724	4.01322	4.29048	4.07734	4.12839	4.05492	4.2797	4.68288	4.95938	4.73042	5.07436	5.221	5.16719	5.02207	4.53133	4.72292	4.57395	4.68292	4.52515	5.04174	5.11409
ENSG00000167193	CRK	4.06724	4.66659	4.12075	4.6645	3.90627	4.40815	4.34799	4.66975	4.82455	4.769	4.83294	4.88815	4.90465	4.90414	4.64389	4.69151	4.41892	4.43756	4.62553	4.67293	4.83894
ENSG00000196352	CD55	4.06724	4.39605	4.56625	5.72242	4.25848	3.42558	4.12528	4.25996	4.40147	5.70497	4.34521	5.09756	4.09496	4.22937	4.59709	4.13871	4.41756	4.64249	4.59654	3.76757	3.66011
ENSG00000013288	MAN2B2	4.06341	3.78834	3.84183	4.12003	4.27956	3.73966	4.15291	2.7449	2.10895	2.61671	2.48391	2.11608	2.1445	2.44189	2.93947	3.04479	2.68161	2.85704	3.02026	2.66281	2.42338
ENSG00000102572	STK24	4.06341	4.51317	3.5238	4.40539	3.48671	3.73606	3.70755	3.93584	3.83862	3.76123	3.64498	3.78545	3.70779	4.011	3.88039	3.61663	3.64302	3.85496	3.52827	3.70943	3.53519
ENSG00000133243	BTBD2	4.06341	3.49615	3.44379	3.73373	3.81019	3.93601	3.72315	3.86347	3.6254	3.64823	3.23304	3.10975	3.1898	3.31239	4.22436	4.11067	4.21016	4.19007	4.03348	3.65101	3.47879
ENSG00000140497	SCAMP2	4.06341	3.42793	3.86834	3.8954	3.85502	3.71975	3.58904	3.33385	3.1522	3.53117	3.46237	3.88507	3.37439	3.57894	3.1542	3.18672	3.39103	3.0942	3.29846	3.31437	2.99175
ENSG00000146433	TMEM181	4.06341	4.16877	4.89115	4.1083	3.92551	4.72747	4.61594	3.88339	4.00425	3.77627	4.06316	3.80906	3.77109	3.79801	3.93186	3.96873	3.64418	3.9508	3.96401	3.8531	4.32609
ENSG00000151779	NBAS	4.06341	4.68619	4.24061	4.20733	4.65404	4.41717	4.5917	4.36429	4.37564	4.59062	3.88498	3.62918	4.21819	3.86081	4.49648	4.2197	4.76419	4.91789	4.43905	4.62547	4.48976
ENSG00000169129	AFAP1L2	4.06341	3.58236	4.80456	4.68992	4.42452	5.04222	5.10047	-3.23456	-1.33055	0.96985	1.67686	1.58276	-1.55355	-1.71441	-0.868687	-1.07164	-1.0887	-0.870258	1.60542	-3.2765	-2.96056
ENSG00000099942	CRKL	4.05958	4.03376	3.67162	4.23565	4.54384	4.18604	3.98182	4.42739	4.33974	4.41913	4.47318	4.5713	4.56439	4.37468	4.45631	4.47871	4.41208	4.1218	4.22279	4.48505	4.38193
ENSG00000119318	RAD23B	4.05958	4.24674	4.20291	4.22916	4.21536	4.24675	3.99794	4.86472	4.96702	5.02619	5.1994	5.36423	5.13656	4.99941	4.79141	4.71933	4.64097	4.43867	4.36479	4.88658	4.85253
ENSG00000168961	LGALS9	4.05958	2.76779	3.32119	4.34768	3.13667	2.85452	3.38831	0.517779	0.060471	1.7758	1.26396	1.87889	0.54754	-0.0294191	1.10593	0.630073	0.526955	0.714705	1.26249	-0.260196	-1.18133
ENSG00000198625	MDM4	4.05958	3.3461	4.28393	3.8096	3.70725	3.89946	3.57621	2.48034	2.89718	3.07167	3.25754	3.26955	2.84614	3.06816	2.74305	2.62624	3.21055	3.23651	3.27985	2.89039	3.05941
ENSG00000213445	SIPA1	4.05958	4.34044	3.79192	3.7322	4.2091	3.43449	3.76145	4.25002	4.17335	4.17212	3.96242	3.99893	3.97035	3.99835	4.22567	4.3577	4.28615	4.06319	4.08629	4.16267	3.8754
ENSG00000170624	SGCD	4.05573	3.70593	4.32279	4.07372	4.24323	4.41267	4.34547	-4.81952	-3.88855	-3.17093	-1.15203	-0.423344	-3.04831	-2.69238	-5.07256	-5.19266	-7.62786	-6.31872	-5.428	-5.51354	-4.71058
ENSG00000170873	MTSS1	4.05573	2.87701	4.1642	4.28963	3.75964	4.16478	3.76899	2.83767	2.58358	2.99176	2.53903	2.752	2.1445	2.05601	3.48695	3.64087	3.56381	3.35312	3.47071	2.54252	2.86959
ENSG00000173281	PPP1R3B	4.05573	4.47141	4.61665	3.95819	4.29443	4.82559	5.04411	3.1651	2.4942	3.35702	3.61741	3.49329	3.56059	3.29733	3.56665	3.09552	3.76821	3.82211	3.87806	3.59685	3.92769
ENSG00000013563	DNASE1L1	4.05187	3.78532	3.44965	4.29586	3.72053	3.3309	3.86356	3.00521	2.98456	3.3061	3.30533	3.50619	3.63564	3.16786	3.32527	2.86588	2.82025	2.58516	2.56635	3.36954	2.62684
ENSG00000066777	ARFGEF1	4.05187	4.02609	4.19246	4.09766	4.36094	4.10741	4.23004	3.91082	3.92381	3.99136	4.01747	4.07664	3.88063	3.95714	4.04527	4.01728	3.88734	4.25651	4.19117	3.89434	4.07108
ENSG00000108021	FAM208B	4.05187	3.725	3.94922	4.33061	4.00723	4.04477	4.21494	3.98184	4.31603	4.07738	4.43956	4.62105	4.33382	4.26498	3.90104	3.82359	3.93771	4.04432	3.88779	4.24445	4.0912
ENSG00000113273	ARSB	4.05187	3.80935	3.49573	4.06403	3.80605	3.47393	3.28694	3.07616	2.35727	3.17461	3.04547	3.00007	3.02948	2.7858	3.30062	2.56357	2.98224	2.76609	2.95632	3.0536	2.7703
ENSG00000114554	PLXNA1	4.05187	3.20602	2.90935	3.28391	2.87693	3.12059	3.03827	4.28713	3.90226	3.8403	3.87197	3.9455	4.11949	4.19581	4.50622	3.99667	4.08337	4.10999	3.82432	4.17721	3.88493
ENSG00000119638	NEK9	4.05187	3.39456	4.15346	3.35315	3.98906	3.91387	3.73282	3.14378	2.58358	2.7617	2.62573	2.94431	2.29639	2.76008	3.06918	3.33326	3.106	2.86698	2.74264	2.7974	2.38169
ENSG00000101665	SMAD7	4.048	4.83409	4.89115	5.0168	4.2524	4.22509	4.28365	-0.192251	-0.400259	-1.93214	1.2118	0.58883	2.19154	2.46167	0.103079	-0.257197	-2.07327	0.30089	-0.100932	1.37085	0.200674
ENSG00000132669	RIN2	4.048	3.70112	3.67663	3.88993	3.48152	3.85036	4.13698	4.13924	3.69056	3.92035	3.07009	3.00916	2.96596	2.83403	4.62068	4.46734	4.53358	5.01909	5.08022	3.73879	4.06031
ENSG00000178982	EIF3K	4.048	4.94129	3.92837	4.45627	4.19013	4.27804	4.5821	4.58531	4.45871	4.39009	4.3105	4.26861	4.67113	4.47906	4.61669	4.46948	4.61858	4.42359	4.42397	4.60818	4.45638
ENSG00000269821	KCNQ1OT1	4.048	2.54259	3.72579	3.52009	3.5376	3.43671	3.59542	2.50112	2.84692	2.49014	2.31566	2.12447	2.20536	2.76804	2.17129	2.07225	3.55142	3.04688	3.07809	2.69103	2.33679
ENSG00000007384	RHBDF1	4.04413	2.95179	3.45549	3.73983	2.55005	3.23213	3.36114	3.49918	3.43037	4.01533	3.36491	3.26955	3.2937	3.44996	3.47047	3.6063	3.6558	3.68737	3.5166	3.70113	3.51166
ENSG00000105810	CDK6	4.04413	3.2128	3.84628	3.89267	4.48541	4.51494	4.32131	3.29719	4.07017	3.5608	4.04836	3.58123	3.19674	3.45982	3.63825	3.59067	3.04014	3.53355	3.1532	2.49209	3.49754
ENSG00000114745	GORASP1	4.04413	4.12276	4.38532	4.13051	3.83482	4.08212	3.80976	3.7046	3.46411	3.57592	3.61629	3.32882	3.55879	3.445	3.65488	3.57487	3.70249	3.69763	3.61131	3.61685	3.40221
ENSG00000173889	PHC3	4.04413	3.85192	4.25408	4.40251	4.74996	4.41942	4.34799	3.12884	3.13997	3.2627	3.23739	3.37173	3.02818	3.14663	2.87748	2.6415	3.14775	2.98582	3.20914	2.89403	3.11365
ENSG00000182179	UBA7	4.04413	3.7547	4.10598	4.06525	3.66667	3.99894	3.79691	1.67004	1.79015	2.68207	2.57159	2.15754	2.5137	1.28836	2.53266	2.21504	2.92	3.01742	3.56028	2.12722	1.60313
ENSG00000072310	SREBF1	4.04024	3.58932	4.14264	4.02587	3.65289	3.57814	3.9035	3.88537	3.39788	4.12663	2.89925	3.32519	3.81981	2.74804	4.08839	3.82471	4.0503	3.71425	3.92483	3.9648	3.21531
ENSG00000088247	KHSRP	4.04024	3.2128	3.83736	3.81827	3.83074	3.97012	3.51924	4.97094	4.9447	4.80153	4.84393	5.22393	4.82112	4.99814	4.57155	4.9715	4.75179	4.31216	4.34749	4.71201	4.40576
ENSG00000101126	ADNP	4.04024	2.80413	3.81482	3.25227	3.97066	3.53113	3.5719	3.1909	3.2373	2.98692	3.23594	4.02157	2.89811	3.21232	3.1236	3.38553	3.0187	3.03516	2.7297	3.07411	2.86822
ENSG00000105538	RASIP1	4.04024	4.42161	4.58502	4.62387	4.01083	4.47339	4.54197	4.82613	4.83748	4.72994	4.55569	4.42957	4.49014	4.7085	4.84822	4.70911	4.56227	4.46782	4.53799	4.56842	4.56575
ENSG00000136450	SRSF1	4.04024	4.55907	4.17486	4.0083	3.62492	4.11575	4.03749	5.02887	5.42257	5.07567	5.56712	5.48558	5.55171	5.4467	4.67059	4.97852	4.69772	4.81934	4.78718	5.48092	5.85556
ENSG00000049860	HEXB	4.03634	4.51499	4.67788	4.47558	4.17414	4.54817	4.41559	3.97628	3.91092	4.23676	4.08426	4.15242	4.28532	3.96842	4.11267	4.03952	3.87844	4.02521	4.27466	4.09035	4.19166
ENSG00000104518	GSDMD	4.03634	4.79551	3.75923	3.84255	3.41774	3.88815	3.95398	3.08822	2.97633	3.4964	3.4119	2.69683	3.2264	3.31647	3.20556	3.34106	3.75097	3.65904	3.71264	3.22069	3.39175
ENSG00000136436	CALCOCO2	4.03634	4.06529	4.55541	4.61312	4.32663	4.51389	4.23413	2.99426	2.98729	3.41223	3.52545	3.67272	3.18516	2.99539	2.98968	2.81745	3.02229	2.99643	3.16712	2.90733	2.71186
ENSG00000155380	SLC16A1	4.03634	3.73131	3.57835	3.71219	4.61902	4.19787	4.22731	5.0923	5.26148	4.88847	5.4258	5.40267	5.80863	5.31969	4.95159	4.77226	4.6966	4.92901	5.09989	5.5121	5.56903
ENSG00000164754	RAD21	4.03634	4.687	4.78149	4.49733	4.7478	4.80426	4.73523	4.65997	4.85778	4.92647	5.06459	5.13228	5.06069	4.82475	4.59049	4.65189	4.60546	4.83293	4.72736	4.95247	5.28416
ENSG00000166340	TPP1	4.03634	2.85408	4.30349	4.10948	4.19965	3.63916	3.70951	3.16021	3.06177	3.07928	2.89374	3.49653	2.4724	2.86963	3.5882	3.35655	3.27527	2.91889	3.31587	2.50645	2.51561
ENSG00000103855	CD276	4.03243	3.3826	2.08163	3.01649	2.71832	3.10113	2.73379	5.04045	4.3084	4.30383	3.82453	4.05486	4.11949	4.06856	5.66758	5.23884	4.49852	4.29015	4.75528	4.5726	4.3405
ENSG00000120896	SORBS3	4.03243	2.47283	3.63606	3.50943	3.43395	3.35222	2.92475	3.40172	3.65148	3.80589	3.4833	4.04163	3.53255	3.4275	3.46494	3.55218	3.46687	3.12215	3.40172	3.46497	2.68563
ENSG00000129566	TEP1	4.03243	3.97256	3.67162	3.69189	3.68936	3.43227	3.75197	3.35683	3.77046	3.44201	2.88637	2.35579	2.84908	3.25828	3.63431	3.48612	3.92816	3.89033	3.70826	3.05578	3.22926
ENSG00000142627	EPHA2	4.03243	4.25223	4.57164	4.8584	3.82666	3.95781	4.47441	5.56094	5.38835	5.11503	5.16857	5.11555	5.4596	5.43268	5.3649	5.23466	5.60561	5.35827	5.19836	5.44615	5.25586
ENSG00000220785	MTMR9LP	4.03243	3.6438	4.57969	3.93977	3.29295	3.72702	3.38095	0.984145	1.1942	1.77954	1.12046	0.682697	0.233724	0.355979	1.24679	1.9428	2.40694	1.74916	2.52036	0.0322551	0.95152
ENSG00000080845	DLGAP4	4.02851	2.04709	3.7545	3.50764	3.43395	2.85119	2.90777	3.25347	2.89136	2.88998	2.57159	3.79073	2.01451	2.81877	3.07355	3.17977	2.93914	2.21915	2.00663	2.10012	1.5765
ENSG00000099917	MED15	4.02851	3.16703	3.54587	3.69031	3.5376	3.12335	2.79414	4.09806	3.9825	4.09923	3.75739	4.16264	3.85603	4.03595	4.10984	3.97275	4.14321	3.74153	3.88779	3.8913	3.61911
ENSG00000118482	PHF3	4.02851	4.02224	4.727	4.48649	4.80708	4.73921	4.39868	3.49918	3.76569	3.92289	3.81193	3.82201	3.76799	3.51766	3.76619	3.69791	3.92625	4.22592	4.1031	3.75693	3.83245
ENSG00000130164	LDLR	4.02851	4.41281	4.64248	4.1363	3.31062	4.00045	4.98141	4.42874	4.37355	5.51263	4.50061	5.11239	4.9926	4.53789	3.71301	3.70155	4.60665	4.25335	4.59852	4.73388	3.9138
ENSG00000139990	DCAF5	4.02851	2.86272	3.81936	3.58926	3.52252	3.47176	3.30001	3.28226	2.75049	2.74841	2.6629	3.24668	2.54844	2.92589	2.89075	2.9662	2.99876	2.62282	2.58721	2.5332	2.12346
ENSG00000167468	GPX4	4.02851	3.78683	3.1004	3.67767	3.50728	3.78392	3.95232	5.22233	5.03263	4.89581	4.58958	4.21267	4.78783	4.91091	5.3045	5.13983	5.30527	5.19944	5.14578	4.85637	4.76054
ENSG00000169375	SIN3A	4.02851	3.55241	4.47719	4.02213	4.19965	3.93444	3.98506	3.32368	3.1102	3.42302	3.10228	3.45057	3.05514	3.16484	3.43127	3.20737	3.25707	3.27561	3.05524	3.20414	2.95346
ENSG00000196182	STK40	4.02851	3.71709	3.18016	3.72146	4.01083	3.38017	3.70362	3.12047	3.43037	3.82952	3.95363	4.23414	4.07753	3.77349	2.78631	2.87235	3.01329	2.77492	2.95878	3.32792	2.99426
ENSG00000197381	ADARB1	4.02851	3.79588	3.04724	3.83403	3.58676	3.57209	3.64951	2.58136	2.24303	2.27135	2.18951	2.20577	1.93658	2.20427	2.47434	2.26841	2.53579	2.06643	2.01138	1.97028	2.06001
ENSG00000066084	DIP2B	4.02458	3.89747	4.08352	4.1212	4.16446	3.97165	4.17436	3.94724	4.22867	3.97271	3.75739	3.92403	3.94587	3.86453	4.19255	3.97275	4.10727	3.98848	4.04802	4.01086	4.02997
ENSG00000101940	WDR13	4.02458	4.07027	3.12259	3.91977	3.52757	3.78217	3.8618	3.802	3.39994	3.79762	3.2984	3.07122	3.25436	3.31375	3.8645	3.50292	3.91565	4.01108	3.84446	3.47799	3.38505
ENSG00000135535	CD164	4.02458	4.39803	5.29618	4.85208	4.87198	4.9705	5.1388	4.39791	4.85853	4.43285	4.996	4.95199	4.93018	4.53439	4.46077	4.56323	4.03792	4.13284	4.60954	4.533	5.2219
ENSG00000179950	PUF60	4.02458	4.40298	3.86396	4.15923	3.32807	3.82517	4.06225	4.74735	4.55486	4.51417	4.62988	4.37437	4.69254	4.7085	4.54399	4.66439	4.50624	4.38374	4.22689	4.80855	4.68349
ENSG00000182473	EXOC7	4.02458	4.37104	3.94922	4.08334	3.83482	4.02573	3.81523	3.99288	3.91953	3.88088	3.68803	3.58123	3.79794	3.88115	4.10984	4.01923	3.91468	3.94455	4.00514	3.72862	3.66722
ENSG00000070214	SLC44A1	4.02063	4.05528	4.24061	3.97121	4.13501	4.42837	4.30066	3.9623	3.68384	3.83312	3.97291	3.90468	3.77573	4.32358	3.87205	3.98077	4.00013	4.18411	4.45617	3.92793	4.41659
ENSG00000102226	USP11	4.02063	3.00739	3.32119	3.58419	3.46057	3.62171	3.62272	2.78357	2.31874	2.20063	2.3074	2.56746	2.06338	2.60418	2.82312	2.64655	2.06388	2.12561	2.06956	2.25748	1.9657
ENSG00000105339	DENND3	4.02063	4.46007	4.69279	4.1024	4.27056	3.70877	3.86356	3.54492	3.29357	3.79116	3.44992	3.37876	3.34868	3.46105	3.49241	3.55083	4.00921	3.49239	3.54723	3.75158	3.27137
ENSG00000110237	ARHGEF17	4.02063	3.61681	2.7663	3.47694	3.3567	3.11228	3.49444	3.95385	2.99002	2.14666	2.05125	1.44221	2.06843	2.5147	4.42871	4.45732	3.83106	3.74692	3.97744	2.97085	2.49087
ENSG00000138834	MAPK8IP3	4.02063	3.77162	3.78729	3.52892	3.27507	3.51442	2.75292	3.98091	3.77679	3.58342	3.3977	3.00916	3.56684	3.77349	4.2322	4.29237	4.31061	4.51602	4.58582	3.85622	3.67037
ENSG00000164244	PRRC1	4.02063	3.54706	4.03754	4.27501	4.14817	3.9899	4.09561	3.94535	4.01232	3.96862	3.69438	3.72054	3.98978	3.84112	3.67707	3.59067	3.92529	3.76742	3.85045	3.91123	4.06869
ENSG00000185658	BRWD1	4.02063	4.04012	4.59828	3.8468	4.59038	4.63772	4.71391	2.93632	3.08236	3.19714	3.11653	2.75741	2.90377	2.96799	3.55002	3.17977	3.2586	3.85496	3.8748	2.96162	3.44424
ENSG00000107863	ARHGAP21	4.01668	3.87487	3.95748	4.68044	3.85903	4.01537	3.9899	4.7032	4.67582	5.20706	4.27423	4.46468	4.24742	4.75583	4.51856	4.1234	4.51201	4.05233	4.28207	4.30915	4.37664
ENSG00000161011	SQSTM1	4.01668	4.97488	3.85072	4.34668	4.19648	4.01686	4.18426	4.37558	4.15037	4.21829	4.32966	3.81684	4.38581	4.0376	4.3564	4.16445	4.66877	4.58341	4.80716	4.23106	3.83666
ENSG00000197892	KIF13B	4.01668	3.82564	3.86396	3.92781	3.5426	3.97165	3.79322	3.34682	3.09761	3.31643	3.12595	3.17581	3.35076	3.0256	3.49567	3.2428	3.65812	3.52416	3.4472	3.22069	2.8335
ENSG00000092201	SUPT16H	4.01272	4.04139	3.99405	4.29482	3.98172	4.16879	3.888	4.91155	5.01868	5.11835	5.08647	5.286	5.19169	5.19303	4.83326	4.85092	4.69941	4.83336	4.69889	5.17684	5.04749
ENSG00000108829	LRRC59	4.01272	4.41869	3.5622	4.1212	3.40135	3.58015	3.98344	5.78926	5.65384	5.56093	5.69952	5.96518	6.07118	5.93686	5.34695	5.3002	5.25879	4.99095	4.86251	5.74343	5.683
ENSG00000147274	RBMX	4.01272	4.33941	4.36063	4.05061	3.9595	4.50016	4.03124	4.51873	4.97599	4.80658	4.89765	4.95669	4.97691	4.99093	4.55132	4.69212	4.5298	4.92624	4.79996	4.91617	5.11177
ENSG00000162402	USP24	4.01272	3.78683	3.91147	3.98667	4.07426	3.98688	3.94069	3.88734	3.97564	4.44466	4.08265	4.09809	3.94037	3.91113	3.91977	3.77255	4.34763	4.27343	4.13178	3.92555	3.99584
ENSG00000116514	RNF19B	4.00874	4.72065	4.29048	4.7493	3.78514	3.93914	4.38157	3.44123	3.20949	2.9998	2.97073	3.36467	3.30977	2.88252	3.2135	2.98227	3.27074	2.9093	2.88164	3.24373	2.65574
ENSG00000117616	RSRP1	4.00874	4.35071	3.49005	3.69503	3.42857	3.43227	2.78302	3.24733	3.26908	2.95092	3.13376	2.7136	2.93727	3.38928	3.57284	3.35192	3.5339	3.74513	3.9242	2.90251	3.44332
ENSG00000131238	PPT1	4.00874	4.17803	3.98601	3.71683	4.22781	3.71975	4.10755	4.2431	4.12579	4.04514	4.32966	4.66196	4.42816	4.01351	4.25226	4.14942	3.7181	3.97705	3.90962	4.26431	4.04279
ENSG00000143147	GPR161	4.00874	4.45246	3.2423	3.86504	3.81019	4.29649	4.22182	3.54992	3.05657	3.3645	3.16305	2.8564	2.98611	3.28073	3.93347	3.91534	3.76284	3.90247	3.50653	3.50208	3.7365
ENSG00000164307	ERAP1	4.00874	4.23792	4.53349	4.83153	4.02873	4.28791	4.34042	2.95714	2.97358	3.68954	3.28304	3.3682	2.86512	2.59526	3.05746	3.15341	3.74228	3.63305	3.88131	2.86708	3.01548
ENSG00000196712	NF1	4.00874	3.68172	4.17486	4.19517	4.1317	4.07216	4.22457	3.20364	3.36044	3.22619	3.31497	3.47373	3.17232	3.04376	3.27806	3.09367	3.44024	3.61448	3.49639	3.12257	3.1457
ENSG00000198700	IPO9	4.00874	3.1577	3.67162	3.68874	3.53259	3.73786	3.68182	4.8215	4.696	4.71049	4.77222	5.04991	4.66947	4.76779	4.84652	4.82164	4.91396	4.54882	4.61229	4.75342	4.61196
ENSG00000054793	ATP9A	4.00476	3.47188	3.02384	3.71063	3.66209	4.13638	3.72896	3.39341	2.76649	3.14449	3.05043	3.06688	3.00993	2.97317	3.97379	3.98177	4.10981	4.23042	4.45005	3.60355	3.40505
ENSG00000123933	MXD4	4.00476	3.83884	3.30834	3.82402	3.85101	4.14997	4.0896	4.33566	3.70059	3.55536	3.52307	2.71915	3.87055	3.55497	4.48613	4.36001	4.21645	4.27592	4.62048	3.9532	3.73274
ENSG00000140199	SLC12A6	4.00476	3.77925	4.07596	4.34468	4.39997	3.94539	3.77087	2.78992	2.80106	3.19854	2.90291	3.22344	2.6496	2.72368	3.14592	3.0236	3.10091	3.13592	3.44104	2.58374	2.60888
ENSG00000168300	PCMTD1	4.00476	4.35378	5.90135	4.58291	5.33168	5.46987	5.2049	1.39271	1.9941	2.09661	2.24822	2.02044	1.79756	1.36388	2.03746	1.97927	1.60336	2.50889	2.91629	1.6054	2.44193
ENSG00000182208	MOB2	4.00476	4.17341	4.09105	4.05917	3.52757	4.0807	4.04683	2.48816	2.4071	2.41042	2.39055	2.03831	2.48189	2.45428	2.77919	2.5742	2.48978	2.3478	2.60148	2.37521	2.15079
ENSG00000186350	RXRA	4.00476	4.05024	3.34026	3.81971	4.71501	4.19656	4.08205	3.38085	3.26007	3.24118	3.54666	3.55975	3.59423	3.55266	3.61344	3.68079	3.43621	3.44117	3.5099	3.57051	3.34716
ENSG00000065717	TLE2	4.00076	3.06592	3.12259	3.37486	3.28106	3.73966	3.26044	2.28151	1.53772	1.90118	1.70228	1.91801	1.55295	1.48963	2.83862	2.38175	2.40968	2.58717	2.52868	1.99539	1.71416
ENSG00000115275	MOGS	4.00076	4.24564	3.52935	4.05673	3.46057	3.53942	3.61855	4.36853	4.44685	4.35357	4.36458	4.01707	4.63245	4.45336	4.3558	4.20095	4.39901	4.21494	4.44346	4.28806	4.17289
ENSG00000120008	WDR11	4.00076	4.46102	3.96159	4.23672	4.04641	4.25054	4.15866	3.91179	4.10203	4.17992	4.14114	3.90955	4.15789	3.99157	4.25868	4.11796	4.19749	4.32062	4.44961	4.10564	4.15332
ENSG00000125818	PSMF1	4.00076	3.1763	3.81482	3.90628	5.69217	3.8702	3.55674	4.04864	3.69892	4.05365	3.68909	4.27239	3.68085	3.71495	4.04749	3.91639	4.00921	3.29292	3.40895	3.6596	3.12288
ENSG00000140740	UQCRC2	4.00076	4.67151	4.1784	4.36454	4.12506	4.3842	4.31746	4.78543	4.62057	4.832	4.58731	4.59714	4.84117	4.57412	4.74374	4.51367	4.76419	4.89297	4.75811	4.72777	4.61073
ENSG00000153395	LPCAT1	4.00076	4.09737	3.63606	3.08753	3.77669	3.57209	2.91118	4.01743	3.80029	3.59726	3.79135	4.30227	3.80325	4.14089	3.74076	3.83137	3.53516	3.59267	3.50062	3.49729	3.45432
ENSG00000168209	DDIT4	4.00076	6.73866	6.35165	4.91001	3.54757	3.20113	5.32675	1.73287	1.42937	1.53173	1.10784	0.0338626	0.597293	0.874247	2.2558	2.15253	1.50399	1.70919	1.59911	1.53553	1.33182
ENSG00000185825	BCAP31	4.00076	4.80972	3.99806	4.43105	4.01802	3.89139	4.28891	5.07378	4.67327	4.89106	4.46577	4.87081	4.70921	4.931	5.08857	4.99692	4.7228	4.52285	4.58382	4.79659	4.80745
ENSG00000152102	FAM168B	3.99676	4.10102	3.91995	4.01334	4.15797	4.17943	4.53203	4.64604	4.66647	4.60754	4.70778	4.96839	4.6703	4.6681	4.63406	4.76879	4.39554	4.35577	4.50379	4.88689	4.99631
ENSG00000015676	NUDCD3	3.99274	4.13826	3.84628	4.35663	3.96695	4.05781	4.18708	4.3579	4.11208	4.40105	3.93141	4.02829	4.1808	4.43659	4.4524	4.28995	4.56042	4.4021	4.40195	4.35661	4.4691
ENSG00000113648	H2AFY	3.99274	4.09248	3.71609	3.86643	3.86303	3.32612	3.43171	4.55583	4.2089	4.35232	4.31943	4.48436	4.59533	4.48571	4.52974	4.4106	4.40728	4.3386	4.1356	4.49869	4.22311
ENSG00000125686	MED1	3.99274	3.23736	3.8057	3.74287	3.92168	3.68842	3.63308	3.7841	3.90659	3.88695	3.76243	4.18887	3.72308	3.76854	3.7186	3.80565	3.7181	3.58667	3.39536	3.76491	3.41354
ENSG00000134440	NARS	3.99274	4.24344	3.99806	4.37437	3.87495	3.92814	3.96386	4.67433	5.06662	5.03208	4.98612	4.96372	5.12933	4.98965	4.43835	4.55654	4.73709	4.62599	4.46486	4.97989	5.17303
[truncated: 11,109 more rows]
