# Supplementary material for: Transcriptional drifts associated with environmental changes in endothelial cells
Source: eLife. 2023 Mar 27;12:e81370. doi: 10.7554/eLife.81370 (PMC10168696; doi:10.7554/eLife.81370)
Supplement: Supplementary file 2. [file elife-81370-supp2.xlsx]

## Sheet: Sheet 1
											CULTURE							CORD
	diff.mean.xy	statistic.t	p.value	mean.x	mean.y	sd.x	sd.y	n.x	n.y	parameter.df	12	15	14	16	13	18	17	12	15	14	16	13	18	17
U3IP2	-3.05881	-15.6349	3.34108e-06	1.80682	4.86563	0.0343711	0.513603	2	7	6.18046	4.75169	5.17152	5.04057	4.1597	5.73819	4.45131	4.74643		1.83113					1.78252
CHTOP	-2.04341	-14.6705	2.59923e-07	5.07199	7.1154	0.129019	0.326612	4	7	8.46226	7.42186	7.23236	7.09357	6.66424	7.59863	6.9198	6.87736		5.21417	4.95718	4.9684		5.14822
ERG7	-3.74066	-13.8735	5.75125e-07	0.851651	4.59231	0.570993	0.358491	6	7	8.17206	4.02348	4.32911	5.18973	4.6153	4.66097	4.71802	4.60956	0.95653	0.745673	0.793281	-0.126461		1.13641	1.60447
SRSF9	-2.32689	-13.4687	3.92956e-06	4.3567	6.68359	0.332128	0.233447	5	7	6.76002	6.29345	6.83348	6.71196	6.45699	6.78706	6.72196	6.9802		4.76538	3.91378	4.5722		4.17898	4.35314
DDX21	-3.42862	-13.1753	4.43008e-08	1.67507	5.10369	0.42805	0.510172	6	7	10.9994	4.56018	5.32207	4.55915	5.56792	4.58135	5.52688	5.60826		1.08058	1.78111	1.65604	1.88885	1.34115	2.30269
RL1D1	-3.01633	-13.1227	0.00032061	3.01195	6.02829	0.337752	0.321959	3	7	3.67524	5.42856	6.08772	6.18969	5.81578	6.12625	6.44262	6.1074		3.39683		2.76493			2.8741
BCLF1	-2.4094	-12.2765	1.92788e-07	0.88937	3.29877	0.437342	0.279932	7	7	10.2097	3.25405	3.21184	3.32015	3.25061	2.80418	3.62774	3.6228	1.12702	0.996958	0.81544	1.70034	0.658655	0.446069	0.48111
TR150	-3.55641	-11.656	6.30459e-07	1.87375	5.43016	0.703105	0.396621	7	7	9.4674	5.47731	5.37108	5.23109	5.14636	6.0134	4.89916	5.87269	0.958036	1.57275	1.97551	3.08117	1.44214	1.64022	2.44643
MYO6	-3.34013	-11.5476	1.46102e-06	0.111159	3.45128	0.688519	0.334056	7	7	8.67648	3.24709	3.59737	3.18293	2.97306	3.62542	3.57075	3.96238	1.03957	-0.24256	0.745619	0.540255	-0.130488	-0.242907	-0.931373
APOL2	-3.02417	-11.3578	1.37876e-06	3.47468	6.49885	0.331918	0.550887	4	7	8.87845	6.49654	7.3001	6.64464	5.51612	6.85298	6.43147	6.25009		3.71749	3.45247	3.01315			3.71562
PTH2	-2.92864	-11.3403	2.4067e-07	2.2425	5.17114	0.395696	0.557022	7	7	10.8265	4.73691	5.53444	5.56497	4.0866	5.36817	5.52945	5.37746	2.03939	2.01306	2.01527	2.68704	1.95849	2.04999	2.9343
UT14A	-2.63877	-11.3226	1.60876e-06	0.49394	3.13271	0.23429	0.533042	4	7	8.74393	3.29464	2.97465	3.38299	2.11369	3.51984	3.72861	2.91454		0.308158	0.497513	0.346772	0.823317
SPB1	-4.29351	-11.3116	6.16854e-06	-0.532124	3.76138	0.705056	0.559061	5	7	7.40401	3.91414	3.76848	3.76496	3.1499	2.94468	4.46849	4.31903		-0.123657	-0.301541	-1.69181		-0.651281	0.107669
SON	-3.57925	-11.2285	7.81962e-05	0.47202	4.05127	0.547662	0.431735	4	7	5.18226	4.44657	3.97323	4.06913	3.17124	4.34899	4.35101	3.99872		-0.144472	0.926794	0.940075		0.165683
UTP4	-3.48244	-11.0609	6.58761e-07	-0.694198	2.78824	0.4656	0.624808	5	7	9.94209	2.04741	2.97127	2.58605	2.41295	2.31761	3.4078	3.7746		-0.300829	-1.3766	-0.21736		-0.817358	-0.758846
UTP11	-2.78732	-11.0311	3.27964e-05	0.408284	3.19561	0.412471	0.386256	4	7	6.00586	2.5699	3.57427	3.17766	2.82217	3.47947	3.56917	3.17659		0.275219		-0.078418		0.539624	0.896713
SRRM2	-3.88617	-11.0052	1.68305e-05	1.81609	5.70225	0.554053	0.579357	4	7	6.62659	5.97141	6.1268	6.33922	5.35721	4.60577	5.63926	5.87611		2.06961	0.985846	2.08162		2.12728
WDR36	-4.28228	-10.9323	4.01744e-05	-0.353697	3.92859	0.644815	0.588578	4	7	5.87121	2.98044	4.56865	4.55555	3.61569	3.57497	4.31853	3.88627		-0.561506		-1.01745		-0.355987	0.52015
TOIP2	-3.13477	-10.7595	7.13033e-07	0.667644	3.80242	0.397633	0.6401	6	7	10.1499	3.36176	4.17984	4.00134	2.57407	3.98187	4.50817	4.00987	0.395673		1.08476	0.720694	0.96768	0.822046	0.0150116
LEG1	-1.1041	-10.7331	2.81714e-06	6.94371	8.04781	0.2455	0.11749	7	7	8.61142	7.97992	7.8701	8.22114	8.08001	8.15893	7.99385	8.03073	7.0394	7.24747	6.74067	6.49925	7.01834	7.05069	7.01014
NAT10	-2.69327	-10.6862	5.38835e-05	-0.498117	2.19515	0.511428	0.280115	5	7	5.7227	2.07113	1.86883	2.58338	2.22342	1.8466	2.42367	2.34905	-0.500325	-0.33322		-1.26137	-0.55571		0.160039
HXK2	-4.21495	-10.6016	4.80586e-07	-1.39413	2.82082	0.70333	0.72757	6	7	10.8042	2.57963	4.09697	2.56016	3.48282	1.9971	2.75649	2.27256	-0.379978		-2.21225	-1.50632	-1.80021	-1.75556	-0.710452
DDX18	-2.97334	-10.5162	1.12704e-06	1.10539	4.07873	0.428352	0.550195	5	7	9.85681	3.34132	3.55492	3.89021	4.32982	4.00634	4.92225	4.50626		0.733184		0.705539	1.17638	1.15201	1.75985
PESC	-3.15308	-10.4428	0.000454287	1.29271	4.44579	0.5588	0.302841	4	7	4.03468	4.69549	4.47548	4.07612	4.32067	4.72009	4.77532	4.05733	1.96813	1.38225		1.21021	0.610249
UTP6	-2.91979	-10.2972	0.000482373	0.468623	3.38841	0.266959	0.5598	2	7	4.03073	3.53722	3.0222	3.57495	2.31712	4.03803	3.70724	3.52213					0.279855		0.657392
ACSL4	-3.07542	-10.2854	1.59652e-06	0.26919	3.34461	0.467658	0.565379	5	7	9.67883	3.62858	3.0316	3.72727	3.03695	2.33211	3.7733	3.88246			-0.263902	0.783995	-0.189788	0.484893	0.530751
MPP10	-3.07164	-10.1624	0.000174367	0.310573	3.38221	0.403146	0.510178	3	7	4.91565	3.9867	3.5481	3.76945	2.53293	3.69741	3.02692	3.11396	0.767501	0.159171				0.00504572
EPHA2	-4.27849	-10.028	0.00117736	1.20814	5.48663	0.825163	0.28752	4	7	3.42247	5.88313	5.59376	5.57584	5.14545	5.49113	5.6502	5.06689	1.97476	0.619192	1.85834	0.380274
RINT1	-2.73465	-9.80459	2.67878e-06	-0.854474	1.88017	0.338906	0.61948	5	7	9.56309	2.00123	0.607926	1.62349	2.47948	2.01732	2.215	2.21676		-0.637377		-1.36706	-0.866142	-0.926996	-0.474795
UTP20	-2.99645	-9.79261	0.000213017	-1.46717	1.52927	0.535339	0.392279	4	7	4.89307	1.27448	1.62163	1.08463	1.78317	1.05063	2.02458	1.8658		-2.08209		-0.781921		-1.43306	-1.57163
MMP14	-3.27178	-9.63199	5.54114e-05	2.17005	5.44182	0.0721033	0.888522	2	7	6.25982	4.80698	5.15115	6.87045	4.40791	4.79315	6.1388	5.92433	2.11906	2.22103
NOL11	-3.37833	-9.45357	8.63671e-05	0.544531	3.92286	0.71774	0.41561	5	7	5.91912	3.46146	3.92353	4.23217	3.33399	3.88583	4.50847	4.11456		0.158622	1.55708	-0.338495		0.480602	0.864846
CCHL	-3.98109	-9.43322	5.6356e-05	0.430577	4.41167	0.164089	1.09958	5	7	6.37067	4.79802	4.61182	4.65557	1.97336	5.13825	5.12061	4.58407		0.599286	0.393164	0.559486	0.183496	0.417453
SRPRA	-2.76714	-9.4119	1.35957e-06	1.75556	4.52269	0.477407	0.582378	6	7	10.9899	4.17429	4.78587	4.75461	3.38481	4.53792	5.10887	4.91248		2.3794	1.22525	2.09377	1.19242	1.70076	1.94175
NOP58	-3.41317	-9.34527	4.38482e-05	2.84895	6.26212	0.939217	0.227204	7	7	6.69984	6.02409	6.51144	5.96274	6.21023	6.19777	6.54396	6.38465	1.98912	3.83661	1.91877	3.34672	1.67828	3.53047	3.6427
GLYM	-2.4459	-9.32034	9.05678e-07	3.78067	6.22657	0.452657	0.526475	7	7	11.7362	5.79389	6.23503	5.56531	6.72345	5.75531	6.69375	6.81925	3.98914	3.96999	3.74092	4.16596	3.01654	4.24711	3.33502
WDR43	-2.87135	-9.30641	5.75077e-05	2.69415	5.56551	0.603264	0.396055	5	7	6.43545	5.25005	5.22043	5.22571	5.3367	6.04837	6.08551	5.79178		2.00183	2.22138		2.64265	3.3738	3.2311
NSDHL	-2.86442	-9.27945	6.05517e-06	1.34558	4.21	0.623781	0.461572	6	7	9.12043	4.24219	3.87143	4.37762	3.46961	4.16383	4.39326	4.95205	0.550286	1.00683	1.31212	1.6335		2.38845	1.18227
NUP53	-1.80203	-9.27763	2.33197e-05	3.73175	5.53378	0.146872	0.48362	5	7	7.46286	5.20024	6.2562	6.21877	5.2189	5.20063	5.31166	5.33007		3.77172	3.68495	3.96654		3.59141	3.64413
DCA13	-3.46274	-9.18012	0.0260553	1.20706	4.66981	0.47952	0.437232	2	7	1.51724	4.35056	4.37511	4.58012	4.74136	4.21492	5.48479	4.9418				0.867992		1.54614
IF4A3	-2.1597	-9.16369	1.20077e-06	4.25016	6.40986	0.481366	0.396361	7	7	11.5738	6.46121	6.14168	6.05615	5.85303	6.79873	6.71205	6.84615	3.58714	4.86893	4.38388	4.49048	3.62663	4.57058	4.2235
PXDN	-3.25329	-9.12003	7.17974e-05	-0.258089	2.9952	0.142634	0.931132	6	7	6.32732	2.84782	3.30392	3.39439	2.53097	1.30886	3.2415	4.33898	-0.321425	-0.474158	-0.32511	-0.0837481	-0.197854	-0.14624
PVR	-3.85157	-9.00793	0.00114144	3.29226	7.14383	0.624958	0.606969	3	7	3.74012	7.5071	7.87136	5.9235	7.32809	7.17449	6.99754	7.20474		2.91815	2.94489	4.01373
NOP2	-3.27566	-8.9747	0.00276062	1.5518	4.82746	0.566394	0.428926	3	7	3.04268	4.41168	4.98269	4.77109	4.78378	5.64455	4.34428	4.85414		1.96182	1.78806	0.905522
GNL3	-2.94346	-8.88386	3.04745e-05	-0.261007	2.68246	0.488753	0.59195	4	7	7.50171	1.90512	1.90302	3.18	2.62382	3.05128	3.39097	2.723		0.365058	-0.115225			-0.699634	-0.594226
TPRGL	-1.30009	-8.78549	0.000541952	2.09655	3.39664	0.0531696	0.32004	2	5	4.48563		3.19528	3.10241	3.25172		3.8849	3.54889			2.13414	2.05895
H15	-1.46978	-8.7246	6.69984e-06	7.56437	9.03415	0.384275	0.225815	7	7	9.70235	8.95028	8.9685	8.89253	8.67496	9.19589	9.27796	9.27896	7.12122	8.24102	7.31074	7.66433	7.79573	7.5754	7.24219
TDIF2	-4.33038	-8.67474	0.00727653	-0.850496	3.47989	0.825809	0.391315	3	7	2.39605	2.99974	3.41872	4.19027	3.2768	3.77926	3.43016	3.26426			-0.442462	-1.8009	-0.308128
AKA12	-4.87241	-8.61536	2.13607e-05	-1.7706	3.10181	0.492465	1.34704	4	7	8.23409	2.9885	5.12791	4.25919	3.2018	3.12553	1.90406	1.1057		-1.46648		-2.4997		-1.47692	-1.6393
HHIP	-2.65614	-8.59086	0.000142846	0.266375	2.92252	0.195667	0.677278	2	6	5.95166	3.54002	2.19202	2.7036	2.20113		3.80662	3.09171				0.128018		0.404733
TGFR2	-2.28409	-8.5754	6.27292e-05	0.189101	2.47319	0.121188	0.667239	2	7	6.91259	2.6554	2.94364	2.44314	1.61863	1.53708	3.30926	2.8052				0.274795			0.103408
IF2B3	-4.43428	-8.57346	1.22657e-05	0.432533	4.86681	0.567732	1.19218	5	7	9.0468	4.03884	5.48783	6.23599	3.08931	4.17957	4.77584	6.26031	0.557605	1.15495	0.136162	-0.349012	0.662955
PLOD2	-3.22989	-8.52982	6.93642e-06	3.67535	6.90524	0.854407	0.523132	7	7	9.94426	6.94263	6.96533	7.01327	7.49292	5.8189	6.88323	7.2204	3.87408	2.96722	3.90862	3.24688	2.87393	5.38355	3.47314
EBP2	-2.16821	-8.46138	0.000345135	3.01788	5.18609	0.337133	0.440951	3	7	5.09483	5.59694	5.27296	4.6958	4.90286	4.80016	5.12852	5.90541	3.31461		2.65129	3.08774
RL3	-1.70608	-8.41108	2.76597e-06	4.52547	6.23155	0.344356	0.411605	7	7	11.6374	5.90312	5.82574	6.4962	6.849	5.91097	6.61371	6.02211	4.804	5.15414	4.36084	4.34169	4.51563	4.1347	4.36731
MMRN1	-3.30537	-8.37605	5.16705e-06	0.849401	4.15477	0.859023	0.593431	7	7	10.6645	4.41442	4.99861	3.62973	4.02931	4.73985	3.35206	3.91939	-0.0261172	1.49229	1.52618	1.23693	-0.680729	1.36334	1.03392
CP51A	-2.37996	-8.28978	4.70213e-05	0.928868	3.30883	0.204924	0.709563	4	7	7.55737	3.49206	3.33996	3.91596	1.83711	3.22734	3.37686	3.97252	0.757238	1.15253		1.0531			0.752607
RL31	-1.72148	-8.25946	5.73695e-05	6.36555	8.08703	0.458588	0.242352	6	7	7.33034	8.16764	8.43939	7.87749	8.10951	8.32142	7.90633	7.78745	6.25486	6.71203		5.88885	6.93617	6.59567	5.80572
RS24	-2.14846	-8.20294	2.33708e-05	5.23062	7.37907	0.624687	0.299926	7	7	8.62664	7.08874	7.2224	7.87648	7.62495	7.14798	7.53019	7.16277	5.77178	5.18158	4.7615	4.7736	6.39315	4.85295	4.87976
S10AD	-2.607	-8.18527	0.000121639	3.11774	5.72475	0.728521	0.301487	6	7	6.45968	5.6773	6.03152	6.00247	5.73942	5.96505	5.34014	5.31733		4.39992	2.85831	3.57424	2.67942	2.60567	2.58889
RBM25	-3.07831	-8.1167	7.68972e-06	-0.836643	2.24167	0.545465	0.812238	6	7	10.49	2.40037	2.24243	0.982754	2.55557	3.66463	2.02749	1.81845	-1.14094	-0.301984	0.00123497	-1.32512	-1.11085		-1.1422
PTN1	-3.30973	-7.84102	2.89628e-05	1.91503	5.22475	0.717748	0.725243	5	7	8.83061	5.22312	5.4992	5.26	4.74167	3.91586	6.0927	5.84071		1.22311	1.49058	1.86934	3.09792	1.89417
NOG1	-2.18519	-7.8079	4.77007e-05	3.76784	5.95303	0.680752	0.291312	7	7	8.12616	5.46962	5.99028	5.88055	6.13848	5.70336	6.27818	6.21072	3.74621	3.88699	3.01576	3.60025	3.2688	3.70374	5.15313
CTGF	-3.52188	-7.80783	0.000127366	1.34351	4.86539	0.70142	0.750511	4	7	6.76218	5.90436	4.77131	5.03415	5.09622	3.39305	5.05889	4.79976		2.34085	0.733985	1.28109		1.01814
BOP1	-2.86833	-7.80321	3.47441e-05	1.22822	4.09655	0.635071	0.617397	5	7	8.60823	3.21501	3.84209	4.3672	4.33761	3.42189	4.83283	4.6592		1.4527	0.28401	2.03947		1.24959	1.11532
SPTC2	-2.71198	-7.79725	5.93361e-06	1.55669	4.26867	0.706474	0.589668	7	7	11.6283	4.35436	4.5953	5.235	3.34863	3.8354	4.21183	4.30019	0.469406	2.21629	1.72997	1.98413	1.94734	1.928	0.62172
TRUA	-1.07638	-7.77527	0.0113118	0.854977	1.93136	0.0589765	0.232413	3	3	2.25651		2.06355				2.06753	1.663	0.796522		0.914462				0.853948
GT251	-2.09718	-7.75762	6.09278e-06	2.94682	5.044	0.461559	0.54639	7	7	11.6739	4.51531	4.71011	5.57256	4.97206	4.3545	5.44986	5.73363	3.62891	3.00806	2.93996	3.3454	2.21372	2.61917	2.87255
COIA1	-2.89147	-7.72517	0.00972346	0.479481	3.37095	0.420216	0.602186	2	7	2.38113	4.24346	3.22311	3.55658	2.77638	2.50572	3.41652	3.87489		0.776619		0.182343
HEAT1	-3.42536	-7.6913	3.85522e-05	-0.547109	2.87825	0.585841	0.887563	4	7	8.61786	1.17628	2.99579	3.41631	2.98378	2.3022	3.76546	3.50792		-0.417453		-0.539344		0.0924584	-1.3241
RRP5	-2.97857	-7.68055	9.71558e-06	-0.98027	1.99831	0.62469	0.772972	6	7	10.9784	1.3761	2.42294	1.34465	1.68858	1.32164	3.33423	2.49999	-1.44424	-0.541452		-0.374683	-0.331417	-1.59076	-1.59907
IF2B2	-2.88033	-7.6617	1.25797e-05	1.36394	4.24427	0.545962	0.800971	6	7	10.5483	2.84939	3.74325	4.51035	4.50415	4.01369	4.74435	5.34475		2.13677	1.32871	1.38193	0.812752	0.729375	1.79413
SP100	-2.44566	-7.61567	7.77636e-06	2.48945	4.93511	0.657153	0.538557	7	7	11.5542	4.69875	4.29857	4.21132	5.17786	5.14811	5.49548	5.51565	1.58578	2.37766	1.93666	2.19175	3.14102	3.41748	2.77581
MK67I	-2.63714	-7.59194	0.00690848	3.27073	5.90787	0.557727	0.344684	3	7	2.68437	5.85917	6.22975	6.22748	5.79126	5.24823	6.13953	5.85967		3.71726	2.64557		3.44937
TBL3	-3.09863	-7.56994	2.73321e-05	0.382526	3.48116	0.663947	0.745468	5	7	9.37779	2.09469	3.32529	3.89462	3.64841	3.05336	4.31832	4.0334		1.46363	0.573586	0.05679		-0.135632	-0.0457458
PTPRF	-1.79352	-7.55134	0.000648306	0.337621	2.13114	0.145376	0.478768	2	5	4.99498		1.41984	2.13863	2.74895		2.28702	2.06127		0.234825	0.440418
IF4G3	-0.335033	-7.4889	0.0175881	1.80125	2.13628	0.0431997	0.0462238	2	2	1.99091				2.16897		2.1036				1.83179				1.7707
PAI1	-2.86656	-7.44425	9.74437e-05	3.02164	5.8882	0.565258	0.691955	4	7	7.56428	5.77962	5.48628	6.40586	6.39149	4.53795	6.3428	6.27338	3.07138	2.51046	3.79471				2.70999
SND1	-2.14562	-7.44058	2.95328e-05	3.82312	5.96874	0.663962	0.375823	7	7	9.48678	6.18413	6.32239	5.37803	6.3451	5.54422	6.04079	5.96654	3.00846	3.71509	3.37187	4.27046	3.22626	4.42794	4.74179
NSF	-2.54243	-7.42193	2.5705e-05	1.45924	4.00167	0.779155	0.462957	7	7	9.76703	3.77126	3.358	4.21569	3.47694	4.4894	4.44131	4.25908	0.476867	0.537796	2.54302	1.81353	1.06379	1.86695	1.91274
P4HA2	-2.68138	-7.37564	5.00075e-05	2.09086	4.77224	0.86412	0.422433	7	7	8.71286	5.31469	4.42694	4.90482	4.9656	4.02087	4.96265	4.81008	1.73771	1.67926	0.712075	2.67953	2.46306	3.42403	1.94037
PGAM5	-2.70532	-7.36413	0.000209954	3.04744	5.75276	0.578657	0.598931	4	7	6.56682	5.62617	5.63377	6.39977	4.82688	5.21857	6.26526	6.29887	3.74917			2.3583	3.17736	2.90493
SF3B2	-1.92618	-7.36033	4.40647e-05	1.48315	3.40932	0.533552	0.383761	6	7	8.95076	2.8297	3.20111	3.22058	3.34361	3.59126	3.6646	4.01439		0.803499	1.51304	1.15214	1.6784	2.37808	1.37371
SMCA4	-2.13968	-7.3177	7.37895e-05	-0.0641359	2.07555	0.406414	0.556261	4	7	8.17609	2.39684	1.66892	1.02724	2.30981	2.70489	2.23903	2.18211		-0.634795			-0.0641077	0.161781	0.280578
JAK1	-2.44297	-7.30962	3.61444e-05	-0.843517	1.59945	0.391762	0.753005	5	7	9.38699	1.11227	2.30752	2.32049	1.00011	0.697744	2.51733	1.24068	-0.182746	-1.21631	-0.927106	-0.873455	-1.01796
AGRL4	-2.79606	-7.20706	0.000188156	1.37532	4.17138	0.740148	0.5354	5	7	6.90572	3.95238	4.15979	3.6905	3.8811	3.89437	5.29137	4.33017		1.66429	2.2116	0.244347	1.12392	1.63243
IBP7	-2.72507	-7.16209	0.000724962	0.336358	3.06143	0.795782	0.356099	5	7	5.15575	3.43061	3.12233	3.01624	2.64818	3.61094	2.72921	2.87249	0.678812	1.41021	0.390942	-0.697344		-0.100826
TIE1	-2.38487	-7.1274	9.95759e-05	-0.023036	2.36184	0.295942	0.761165	3	7	7.99507	3.18697	2.13746	2.18548	0.890516	2.44814	2.64176	3.04253			0.08015	-0.356757	0.207499
ELAV1	-2.62194	-7.12253	0.000103026	4.00541	6.62735	0.787701	0.474019	6	7	7.94762	5.68981	6.88112	6.68131	6.64152	6.50945	6.75048	7.23776		4.63495	4.35407	3.72889	4.82908	2.66557	3.81993
RL8	-2.71835	-7.09711	0.000237559	4.50368	7.22204	0.984827	0.238871	7	7	6.70354	7.24061	6.86779	7.05217	7.61263	7.21899	7.39963	7.16243	3.42377	5.44377	3.58826	5.16377	4.73419	5.68804	3.48399
CLPB	-2.23389	-7.00163	4.81795e-05	0.764	2.99789	0.510785	0.589321	5	7	9.49819	2.27252	3.13481	2.2795	3.18682	2.76937	3.55176	3.79043	-0.08057		0.988739	1.26727	0.921588		0.722973
DKC1	-2.90444	-6.99037	9.23023e-05	0.617168	3.52161	0.730113	0.67981	5	7	8.35258	4.00587	3.67489	2.76465	2.77587	4.57716	3.07043	3.78237		1.01498	1.22455	-0.273293		-0.0748601	1.19446
PHIP	-2.02765	-6.92312	0.000230548	0.365272	2.39292	0.284089	0.594359	3	6	6.97339		2.7688	1.96807	2.83672	1.41184	2.92395	2.44814		0.503157		0.0385549		0.554103
RL24	-1.71318	-6.90893	0.000969282	6.58721	8.30039	0.522896	0.218227	5	7	5.00555	8.14045	8.38515	8.33318	8.55864	7.92841	8.51008	8.24681	6.88855	7.28191	6.58726	6.19906		5.97926
LAS1L	-2.40199	-6.85711	0.00034642	0.146158	2.54815	0.134401	0.909571	4	7	6.44844	1.38168	1.81599	3.58099	2.93746	1.63955	3.41977	3.06157	0.0442119		0.331481	0.159136		0.0498012
TM214	-2.89896	-6.83524	8.53787e-05	0.901372	3.80033	0.541263	0.863973	4	7	8.78446	4.31911	3.4551	4.92577	2.23407	3.4594	3.91812	4.29074		0.725045	0.486432	1.69742	0.696588
UBP2L	-2.8792	-6.82071	0.00020269	0.344365	3.22357	0.929074	0.490197	6	7	7.32334	2.95522	3.69606	3.42175	3.64881	2.47592	3.61035	2.75687		1.96912	-0.2614	0.927801	0.0769151	-0.378326	-0.267923
MA2A1	-2.54914	-6.78926	9.33286e-05	0.139149	2.68829	0.373891	0.861503	4	7	8.71384	2.26224	2.5817	3.4628	1.43253	1.99079	3.28663	3.80137	-0.16869			0.683175		0.00152802	0.040582
BMS1	-3.48922	-6.77832	2.03786e-05	-0.960195	2.52902	1.00371	0.920553	7	7	11.9113	1.41276	1.68154	2.79576	2.4716	2.04641	4.04172	3.25334	-1.61024	-1.69886	-2.03229	-0.182906	-1.58209	-0.180754	0.565775
EGLN	-0.856503	-6.70581	9.10133e-05	5.82345	6.67995	0.145119	0.299378	6	7	8.93473	6.86438	6.84366	6.85162	6.98979	6.1211	6.50918	6.57995		5.6485	6.06158	5.8548	5.80667	5.70182	5.86733
YBOX3	-3.38485	-6.68013	0.00047553	2.35417	5.73902	0.113217	1.32941	3	7	6.19947	4.00534	7.04652	5.38821	7.14102	7.07786	4.55789	4.95633		2.46205			2.23628	2.36418
ADAM9	-2.85721	-6.65856	0.000185696	1.02378	3.88099	0.927219	0.534683	6	7	7.73293	4.25342	4.09015	4.25189	2.98215	4.44083	3.36714	3.78138	1.68369	0.155289	1.84175	2.06283	0.171975	0.227133
DDX5	-2.0931	-6.64854	2.90658e-05	4.66051	6.75361	0.647111	0.524434	7	7	11.5062	5.77765	6.74042	6.42398	7.09557	6.81842	7.37059	7.04864	3.70116	5.83705	4.7553	4.70103	4.84448	4.29342	4.49115
RALA	-2.11293	-6.5875	0.000187448	5.31769	7.43062	0.271276	0.785574	5	7	7.84271	7.94646	7.80099	7.24293	5.72553	7.87927	7.71012	7.70905			5.19661	5.50654	5.69193	5.04056	5.15282
RL23	-2.2381	-6.57054	0.0004225	5.58277	7.82087	0.777021	0.32832	6	7	6.52017	7.45016	8.03219	7.65278	8.37874	7.48581	7.93431	7.81208		5.73021	5.13301	6.98816	5.73975	4.977	4.92849
TIM14	-1.49402	-6.49547	0.000350116	3.2326	4.72662	0.106719	0.574862	2	7	6.9298	5.19632	4.1643	4.31205	4.0481	5.52764	4.6975	5.14043				3.15714			3.30807
NEST	-2.83843	-6.47733	7.04512e-05	3.24779	6.08622	0.98551	0.610707	7	7	10.0159	5.39469	5.99402	6.15855	6.38337	5.25984	7.02673	6.38632	1.86213	4.49032	3.67836	4.07359	2.18528	2.79471	3.65013
SQSTM	-2.95437	-6.44342	0.000364229	1.10455	4.05892	0.270459	1.10254	2	7	6.94509	2.43365	4.63019	5.28333	5.42645	3.48375	3.86224	3.29281		1.29579		0.913306
RS11	-2.10042	-6.44226	0.000158764	5.89355	7.99397	0.783539	0.360793	7	7	8.43489	8.17393	8.30418	7.56873	8.27988	8.28149	7.90218	7.44739	5.69473	7.5455	5.20366	5.3119	6.00962	5.5979	5.89153
GRPE1	-1.72141	-6.41001	0.000210116	5.1096	6.83101	0.270139	0.657158	7	7	7.97147	6.01244	6.64897	6.98843	7.53668	5.92671	7.30321	7.40062	4.91444	4.94339	5.68208	5.19183	4.94529	5.07919	5.011
MRP1	-2.96181	-6.40771	0.000522686	-0.149266	2.81254	0.904928	0.590858	5	7	6.41074	2.4536	2.73773	3.72206	2.22269	2.18965	3.43157	2.93047		-1.17143	-0.651882	1.25454		-0.0806296	-0.0969254
UTP15	-3.57022	-6.39246	0.000545719	0.885006	4.45523	1.0961	0.708161	5	7	6.36367	3.55014	4.16377	5.00168	4.23689	4.33312	5.74203	4.15895	0.939886	-0.744342		0.937607	0.943401		2.34848
WDR12	-3.03107	-6.38555	0.00269622	2.00386	5.03494	1.05095	0.175909	5	7	4.16059	5.0886	5.11237	5.25175	4.80323	5.10221	5.10862	4.77777	1.43938	3.32613	0.837534	1.53465		2.88161
NRCAM	-1.72846	-6.36652	0.000638379	0.334684	2.06314	0.0438268	0.713605	2	7	6.15303	1.11142	1.44728	1.84666	2.78971	1.70825	2.95934	2.57934		0.303693	0.365674
C1QR1	-3.05975	-6.35452	8.30679e-05	2.17947	5.23922	0.684946	0.982921	5	7	9.99908	4.36131	6.6172	6.47698	5.10827	4.04475	4.85104	5.215		2.24976	2.24357	3.24858		1.59118	1.56427
AT1A1	-0.953519	-6.33525	0.000124691	6.56183	7.51535	0.351202	0.187697	7	7	9.16901	7.28198	7.55131	7.72632	7.5046	7.24376	7.67333	7.62617	6.34361	6.31002	6.62142	7.28997	6.39616	6.65359	6.31806
DOCK4	-0.799206	-6.32817	0.00326921	0.317768	1.11697	0.119602	0.24816	2	7	3.97156	1.13396	1.11745	0.66805	1.34412	1.17627	0.963598	1.41538		0.40234		0.233197
RL27A	-1.64818	-6.31623	0.000356205	6.75133	8.39951	0.65816	0.208488	7	7	7.19215	8.21949	8.25428	8.39173	8.77794	8.32155	8.58526	8.24634	7.08708	7.50246	7.09743	6.31454	7.28114	6.27689	5.69978
MANF	-1.7421	-6.27194	0.000230696	5.21811	6.96021	0.249096	0.673192	5	7	8.07557	7.59547	6.51412	7.05083	6.94403	7.82171	5.79227	7.00307		5.11163		4.9295	5.21871	5.22076	5.60997
IKIP	-1.64369	-6.21255	8.65077e-05	5.48354	7.12723	0.38303	0.585908	7	7	10.3364	7.54123	6.60035	7.58042	6.06446	7.55886	7.42638	7.11894	5.08461	5.38983	5.58377	5.99935	5.95566	5.32004	5.05155
AAAS	-3.10276	-6.18817	0.000111644	0.134328	3.23709	0.651584	1.1245	6	7	9.81414	2.65185	3.08061	3.74045	2.82767	1.40689	4.91152	4.04063	-0.218927	-0.831318	0.428576	0.886156	-0.163139		0.704619
ATPG	-0.709057	-6.16635	9.27988e-05	7.61539	8.32445	0.254893	0.166088	7	7	10.3168	8.45398	8.40661	8.15576	8.02879	8.44141	8.43247	8.35212	7.54254	7.9661	7.44049	7.8175	7.80943	7.48391	7.24778
SYG	-2.87724	-6.16314	0.00039989	0.12864	3.00588	1.17448	0.382378	7	7	7.25783	2.76545	3.16312	3.51251	3.44157	2.96867	2.52753	2.6623	-0.574904	0.0901754	2.56225	0.619599	-0.460992	-0.675539	-0.660109
HMOX1	-2.70888	-6.14831	0.000169671	2.55792	5.2668	0.519192	0.941861	4	7	8.99227	5.53619	5.88799	6.39532	4.17594	4.51482	6.1325	4.22482	3.01083		2.98609			1.99076	2.24398
HNRPC	-1.3721	-6.13339	5.08795e-05	7.15645	8.52855	0.412913	0.42406	7	7	11.9915	7.77331	8.3269	8.38305	8.55125	8.85685	8.73673	9.07179	6.8213	7.80375	7.05346	7.62123	6.93814	7.16695	6.69034
NDUF4	-2.9498	-6.1263	0.000603078	-0.0350368	2.91477	0.212516	1.24252	4	7	6.59548	1.47175	2.15389	4.04575	1.56695	4.71048	3.43493	3.01961		0.0110963		-0.346724		0.0759131	0.119567
MARCS	-2.51535	-6.10504	0.000129553	1.65053	4.16589	0.518335	0.901189	5	7	9.71796	5.36468	5.08959	3.54867	4.29048	4.52353	2.96838	3.3759		0.926868	1.54394	1.48052		2.07839	2.22296
P3C2A	-2.22736	-6.08231	0.000187486	-0.019476	2.20788	0.849042	0.394478	7	5	8.94861		2.4011	1.53489	2.37433		2.53099	2.19809	-1.07679	1.34027	-0.58708	0.131587	-0.526504	-0.239668	0.82186
COPA	-1.88451	-6.08217	0.000102336	3.3168	5.20131	0.685491	0.449573	7	7	10.3557	4.42442	5.24724	5.29188	5.2658	4.83272	5.75339	5.59375	2.61887	4.61867	3.14114	3.81434	2.81237	3.19497	3.01724
TMM33	-2.5805	-6.04963	7.5372e-05	3.81437	6.39488	0.688148	0.894482	7	7	11.2598	6.23447	7.11648	6.98726	4.62281	7.24472	6.19551	6.36289	4.54765	3.39456	4.77249	3.93429	2.85587	3.29578	3.89999
RS14	-1.86826	-6.03675	0.000280328	5.90355	7.7718	0.750378	0.327687	7	7	8.20814	7.52154	8.155	8.30355	7.74298	7.63285	7.4583	7.58841	5.27715	7.13735	4.84657	5.81051	6.47813	5.94777	5.82736
G45IP	-2.75448	-6.00966	0.000570403	0.98821	3.74269	0.421928	1.02315	5	6	6.89025	3.5306	2.87637	4.34619	2.32859		5.06837	4.30603		1.01468	1.02195	0.522796	1.64443	0.737185
LIMA1	-2.34614	-6.00951	6.5581e-05	2.17057	4.51671	0.775737	0.682014	7	7	11.8064	3.78634	4.76458	3.84468	5.46729	3.91503	4.64187	5.19721	1.463	1.54065	1.72156	3.56806	2.88015	1.96748	2.0531
PLOD3	-2.20344	-5.99075	6.30603e-05	3.31513	5.51857	0.689488	0.686716	7	7	11.9998	4.85291	5.2837	5.51152	6.09497	4.48539	6.18132	6.22016	3.0295	3.72229	2.95416	3.52877	2.08663	4.20038	3.68417
SAS10	-2.29769	-5.96294	0.0146511	0.65834	2.95603	0.42367	0.641175	2	7	2.55465	2.65454	2.83716	1.89732	2.87703	2.94442	3.70573	3.77598		0.95792		0.35876
RDH11	-1.88759	-5.88097	0.000687465	5.18239	7.06998	0.17933	0.822261	5	7	6.78059	7.68527	7.36206	7.56946	5.60136	7.79021	6.26591	7.21559	5.39788		4.95217	5.05379	5.28864	5.21945
MACF1	-1.99674	-5.87758	0.00071952	0.214273	2.21102	0.873508	0.211805	7	7	6.70311	2.35902	2.08882	2.10189	2.55648	2.12051	2.32288	1.92752	-1.41799	0.674105	0.726251	1.08315	-0.498619	0.30867	0.624347
AP1G1	-1.96665	-5.80165	0.000297682	1.04576	3.01241	0.806897	0.391507	7	7	8.67669	2.63399	2.80452	3.30444	2.67421	2.86069	3.72317	3.08588	0.529915	1.64718	1.79428	1.97216	0.104268	1.20124	0.0712849
RAB32	-1.92028	-5.8005	0.000172856	2.61251	4.53279	0.466816	0.679773	5	7	9.99977	4.35951	5.4945	4.90672	3.49851	5.11986	4.23724	4.11318			2.66944	2.32279	2.37935	2.28801	3.40297
DHCR7	-3.08053	-5.77597	0.00181053	1.38315	4.46369	0.440906	1.14487	2	7	5.29125	5.32576	4.75831	4.79816	2.02388	5.00464	4.12247	5.21258			1.69492	1.07139
FND3B	-2.37393	-5.76654	0.000385236	1.30232	3.67625	0.354492	0.983063	4	7	8.19288	4.07562	3.17545	4.30238	1.73929	3.6001	4.16467	4.67624		1.45162	1.20846	1.68954		0.859652
AGRIN	-1.94632	-5.76023	0.00134031	-0.709439	1.23688	0.6828	0.382726	5	7	5.802	0.895084	1.02244	1.79855	0.971483	1.73609	0.955505	1.279		0.48281	-1.25144	-0.858951	-0.928815	-0.9908
BUD31	-2.50225	-5.75933	0.000188328	1.13434	3.63659	0.646756	0.857752	5	7	9.92287	4.07643	2.65958	3.76101	2.85735	5.2346	3.3716	3.4956		1.83629		1.81531	0.898073	0.519313	0.60271
OSBL3	-1.24425	-5.72962	0.00134419	0.0763769	1.32062	0.099765	0.503083	2	6	5.84275	1.61343	0.87546	1.58767	0.678886		2.00813	1.16017	0.00583236						0.146921
EMC2	-2.93174	-5.72509	0.000270722	3.30156	6.2333	1.19707	0.634553	7	7	9.12519	6.37595	5.27049	5.77912	6.03376	6.14961	7.04749	6.97667	2.30502	3.88677	3.48523	5.13252	1.85189	2.28592	4.16356
DHX30	-2.96368	-5.71908	0.000315814	-1.30866	1.65502	0.573022	1.2234	6	7	8.77465	-0.959452	2.00561	2.25067	2.46192	1.45081	2.63867	1.7369		-0.688139	-1.29363	-1.50947	-1.80951	-1.96956	-0.581654
ACINU	-2.07698	-5.70284	0.000262843	1.78778	3.86476	0.730113	0.553705	6	7	9.26796	3.49613	4.03257	4.18767	4.21066	2.75157	4.23338	4.14134		1.61172	1.45231	2.35483	1.24691	1.08443	2.97648
NOP16	-1.85246	-5.68891	0.0011368	1.32388	3.17635	0.0604646	0.854068	2	7	6.2009	3.87003	2.15324	2.18905	2.5547	4.19368	3.7559	3.51782						1.28113	1.36664
RB12B	-2.13941	-5.68144	0.00032039	0.732634	2.87205	0.39303	0.84986	4	7	8.85184	3.84487	1.62367	1.99214	2.44004	3.4326	3.50035	3.27065		0.704847		0.1867		1.0231	1.01588
ICAM2	-1.33349	-5.671	0.00056085	6.9721	8.30559	0.510766	0.287537	6	7	7.61699	8.2175	8.08164	8.65572	8.33716	7.82776	8.5481	8.47122		7.38598	7.2651	7.48317	6.99071	6.25092	6.45672
AKAP8	-1.2971	-5.66484	0.000580725	1.47811	2.77521	0.236213	0.486632	3	7	7.55777	3.6918	2.53145	2.26341	2.50325	2.68506	3.15599	2.59551		1.28059		1.41396			1.73977
GRSF1	-2.82734	-5.66051	0.00189062	0.602777	3.43012	0.632365	0.834951	3	6	5.37326	2.11853	4.07138	3.13801	4.43041		3.77698	3.04542	0.824458			-0.110582			1.09446
LYRIC	-2.48062	-5.65998	0.00010604	1.83603	4.31666	0.833456	0.806187	7	7	11.9867	5.36652	3.97334	4.41966	2.94037	3.89036	4.58956	5.03678	0.735627	1.97783	0.830755	2.85831	1.65553	2.72808	2.06611
C1TM	-2.10333	-5.65901	0.000211392	1.19405	3.29739	0.511052	0.775482	5	7	9.98008	3.13518	3.29627	3.96375	4.09363	1.78587	3.7171	3.08993		1.68568		1.71867	0.539856	1.14393	0.882134
NUP98	-1.96195	-5.65891	0.000559274	0.0941179	2.05607	0.751918	0.426384	6	7	7.65166	1.59548	2.83074	1.77375	2.25912	1.67755	2.08301	2.17284	-0.554632	0.317108	0.203848	1.2735		-0.87637	0.201253
RL7A	-1.28155	-5.64779	0.000487631	7.10629	8.38785	0.555145	0.22856	7	7	7.97727	8.52028	8.68046	8.34167	8.52878	8.37977	8.30124	7.96274	6.50024	7.90782	7.01754	7.48343	7.58335	6.62881	6.62288
NUP93	-1.74363	-5.64662	0.000280115	2.83185	4.57548	0.618224	0.470707	6	7	9.29167	4.61388	4.99442	4.50365	4.28996	5.14523	3.73226	4.74895		3.35445	2.16591	3.13913	1.95206	3.00303	3.37651
CO6A6	-0.723768	-5.64653	0.0096955	7.31569	8.03945	0.0338591	0.25336	3	4	3.14191	8.13046	7.70471	8.01549		8.30715			7.33681	7.27663				7.33362
MUC18	-2.14343	-5.64634	0.000815633	4.60093	6.74436	0.968317	0.266665	7	7	6.90487	6.74659	6.60571	6.79399	7.08226	6.24386	6.93685	6.80127	2.5655	4.63158	4.41563	5.47806	4.80701	5.04677	5.26196
RRP1	-1.70716	-5.60975	0.000927977	1.0682	2.77536	0.198913	0.713996	2	7	6.72501	1.64847	2.6806	2.90165	2.69891	3.41913	3.81535	2.26343		1.20886	0.927551
POGZ	-2.28179	-5.60776	0.00145365	-0.0784337	2.20335	0.954857	0.30863	6	7	5.89616	2.15993	1.7765	2.16836	2.1675	1.95924	2.50369	2.68825		1.63478	-0.613857	0.416632	-0.901099	-0.339686	-0.667374
ITA2	-2.14831	-5.59653	0.000486669	4.85762	7.00593	0.934071	0.39872	7	7	8.11628	6.31013	7.05581	7.38537	6.79385	6.80768	7.41489	7.27376	6.20943	4.81085	3.71032	5.76543	3.73519	4.9278	4.84429
CDC5L	-1.70903	-5.58944	0.000299886	1.25065	2.95968	0.368676	0.704166	6	7	9.30885	2.41062	3.3771	3.14526	3.10447	1.65501	3.76785	3.25745		1.20206	1.15146	1.9309	0.813235	1.26956	1.1367
UTP18	-2.34067	-5.57308	0.000833706	1.99201	4.33268	0.241209	1.06441	4	7	7.0136	2.94089	3.92789	4.83874	4.7852	2.99751	5.6336	5.20496		2.12355	2.19285	1.65022		2.00143
ZC11A	-2.1915	-5.56074	0.00132069	0.527087	2.71858	0.0870653	1.03631	4	7	6.14727	3.27228	2.15599	3.56523	1.19163	4.26264	2.39768	2.18464	0.515183		0.409824		0.607586	0.575756
TRAP1	-1.93671	-5.53252	0.000258786	3.39387	5.33058	0.481342	0.791264	7	7	9.90579	4.93986	5.36442	4.91123	6.22983	3.97073	5.99481	5.90319	2.82627	3.12251	3.50342	4.11269	2.89533	3.43929	3.85759
RS7	-1.6925	-5.4943	0.00101807	6.17233	7.86483	0.789801	0.201154	7	7	6.77514	7.7184	7.73619	7.83039	8.2843	7.82784	7.93702	7.71969	6.83644	5.14598	6.26589	6.83697	7.10632	5.65074	5.36401
ACOX3	-2.3539	-5.47746	0.000687631	-0.696029	1.65788	0.372008	1.06363	6	7	7.64788	-0.327506	1.09553	2.96441	1.58683	2.49518	1.93953	1.85115	-0.587867	-1.0164	-0.84459	0.00846843		-0.876617	-0.859164
PTPRB	-2.46209	-5.47619	0.000350428	-0.104377	2.35771	1.0437	0.570677	7	7	9.2933	2.97898	2.26042	2.10364	2.01952	1.45837	2.61491	3.06814	-0.774319	0.716355	-0.190803	1.60721	-0.278893	-1.66787	-0.142326
ITAV	-1.62031	-5.47106	0.000215106	4.08911	5.70942	0.446831	0.643672	7	7	10.693	5.65024	5.59389	5.97334	4.58071	5.39708	6.14647	6.6242	4.44654	4.17684	3.74654	4.59448	3.33859	4.40153	3.91926
S12A4	-2.85641	-5.43064	0.0016031	0.16405	3.02046	0.0268039	1.39071	2	7	6.01555	5.85574	3.08992	2.85686	1.27399	2.81962	2.87701	2.3701		0.183003		0.145097
ZN326	-2.61689	-5.4283	0.005578	0.827915	3.4448	0.689963	0.71836	3	7	4.00204	3.20212	5.03094	3.10034	3.14209	3.52512	3.09674	3.01626		1.59592		0.260406		0.627417
ACSL3	-2.74109	-5.4154	0.000158831	2.4674	5.20849	0.913256	0.979484	7	7	11.9417	5.30101	4.68422	5.28332	3.43544	5.19871	6.14739	6.40932	2.99029	0.930065	2.44298	3.25565	1.59874	2.6001	3.45395
MYO1E	-2.32118	-5.40332	0.0011176	-0.00914331	2.31203	0.968747	0.443745	6	7	6.7775	1.74799	2.79467	2.84179	1.7626	2.47122	2.18095	2.38503	1.01771	0.879377	-1.66401	-0.281622	0.130203	-0.136521
YBOX1	-2.5791	-5.38824	0.000480061	2.93077	5.50987	0.612616	0.973132	4	7	8.7709	4.91769	6.00122	3.86314	5.64273	6.99735	5.30914	5.83782		2.25595		2.8324	3.74276	2.89198
CBPD	-2.75024	-5.37208	0.00129451	0.287034	3.03728	0.189462	1.32322	3	7	6.54285	4.63862	3.03984	3.68152	0.351281	3.39798	3.37451	2.77718	0.406739	0.0685976		0.385766
RS3	-1.31789	-5.3648	0.000255036	5.97709	7.29498	0.535038	0.368997	7	7	10.6546	6.97734	7.1647	7.52009	7.73153	6.71463	7.64232	7.31423	5.39127	7.02468	5.95298	6.02379	5.51472	5.79264	6.13954
RFTN1	-2.80944	-5.35875	0.0273195	-0.412972	2.39647	0.603611	0.805487	2	7	2.18228	3.54573	2.55901	1.86398	2.35033	1.13939	3.17923	2.13761		-0.83979		0.0138454
PIGT	-1.63102	-5.32279	0.000718933	0.386952	2.01797	0.280161	0.68856	3	7	7.96514	1.94929	2.51233	2.21798	0.604182	1.9576	2.13139	2.753			0.359833	0.679686			0.121336
RBP2	-2.56095	-5.31924	0.00169345	-1.14253	1.41842	0.957206	0.58294	5	7	6.114	1.48814	0.710326	1.45106	1.20873	0.842054	1.80868	2.41998		-1.5846	-1.83089	-1.02288		-1.74855	0.474296
MBD2	-1.46821	-5.30247	0.00196384	3.00124	4.46946	0.129413	0.640135	2	6	5.86074	4.54123	4.93928	4.9521	4.74399		4.39942	3.24073		2.90974			3.09275
RAD21	-1.82074	-5.29689	0.000497524	2.15095	3.97169	0.387981	0.750772	4	7	8.9911	4.48784	3.45782	3.7078	4.5106	2.59732	4.50059	4.53984		2.06808	1.80514	2.7068			2.02379
OCAD2	-2.85125	-5.2685	0.00157014	3.20719	6.05844	0.187334	1.41024	4	7	6.36415	6.37584	6.97614	7.18096	3.03952	6.5523	5.71916	6.56516	3.46543			3.01689		3.16709	3.17937
CD166	-2.86542	-5.26427	0.000253348	2.11374	4.97916	0.868595	1.14869	7	7	11.1708	5.28551	3.95758	4.49985	5.71887	3.20531	6.52509	5.6619	2.99847	2.32611	1.22193	3.53346	1.5016	1.61919	1.59544
ADAS	-2.49536	-5.26381	0.000279789	1.86568	4.36105	0.72969	0.975675	6	7	10.8443	3.92931	3.6022	5.13284	3.81704	3.14998	5.78585	5.11009	2.95125	1.54878	1.36069	1.99439		2.3888	0.950193
NU153	-2.38996	-5.23796	0.00139396	-0.403106	1.98685	0.165739	1.1667	2	7	6.67764	3.56449	2.16594	3.40001	0.375714	1.31645	1.21922	1.86614				-0.28591			-0.520301
SR140	-2.12001	-5.18012	0.00336394	0.396054	2.51606	0.859449	0.371933	5	7	5.08112	2.35496	2.03711	2.09504	2.70946	2.55748	2.8372	3.02118		0.810057	-0.446925	1.6095		0.386223	-0.378582
VPS45	-1.79973	-5.14767	0.000925023	0.731628	2.53136	0.750972	0.444622	6	7	7.86436	2.88687	2.91103	2.80946	1.74947	2.15278	2.79568	2.41422		1.36566	0.254756	1.13304	-0.577651	0.978005	1.23595
NOG2	-1.70919	-5.12643	0.00165641	0.695951	2.40514	0.366517	0.631105	3	6	6.5592	2.27942	1.66598	2.30557	2.32589		3.58595	2.26803	0.412747			1.10992		0.565192
IF2B1	-2.41007	-5.12216	0.000885513	2.05192	4.46199	1.00183	0.615448	6	7	8.05558	3.34252	5.14043	4.51222	4.09126	4.50887	4.53499	5.10361		3.18455	1.15715	1.43513	1.53392	3.4709	1.52987
A4	-2.47225	-5.11891	0.000263452	1.22362	3.69587	0.951724	0.852641	7	7	11.8578	3.98105	3.44615	5.25794	2.43997	3.90997	3.43675	3.39926	2.50585	1.16628	0.154953	1.35237	0.749035	2.41056	0.226326
LTOR2	-1.63142	-5.11386	0.00169806	3.92974	5.56116	0.620571	0.41624	5	7	6.53402	5.75967	5.02516	6.03202	5.24077	5.14168	5.98396	5.74487	4.41039	3.86457		4.63389	3.67207	3.0678
PININ	-2.94437	-5.10231	0.00213507	2.6173	5.56166	1.34305	0.476052	6	7	6.07617	5.96491	5.99683	5.64711	5.17517	6.03606	4.81682	5.29473		5.04471	1.98507	2.84419	2.8453	1.27787	1.70663
DREB	-2.38256	-5.09611	0.00145784	1.57348	3.95604	1.19203	0.330336	7	7	6.91614	3.52302	4.46405	3.95121	3.97976	3.55539	4.13171	4.08715	-0.254387	3.31752	1.01669	2.3006	1.97037	0.614209	2.04932
RER1	-2.36952	-5.08493	0.00187525	2.59813	4.96765	0.144907	1.21285	3	7	6.38509	5.44415	6.96713	4.95528	3.33164	3.64061	5.35647	5.07826			2.43675	2.71709			2.64057
SRP68	-1.7697	-5.08491	0.000312345	1.29669	3.06639	0.720037	0.573955	7	7	11.4318	3.22469	3.01888	4.02411	2.69453	2.85051	3.4308	2.22121	1.19245	2.66623	1.74224	0.513757	1.2017	1.04872	0.711705
PRP17	-2.5073	-5.08343	0.000368053	0.214993	2.72229	0.75821	1.0621	7	7	10.8547	2.14493	2.14826	2.6513	3.44016	0.975662	3.86402	3.8317	-0.108312	1.71127	-0.366907	0.732385	-0.0661234	-0.396581	-0.000784659
SSRD	-0.904827	-5.0827	0.000699787	7.42446	8.32929	0.421107	0.21097	7	7	8.83339	8.3974	8.23091	8.22773	8.193	8.06649	8.67795	8.51156	7.68551	7.88404	7.58684	7.83618	6.85648	7.09346	7.02874
HNRPM	-1.8611	-5.03364	0.000790181	4.1861	6.0472	0.880227	0.426746	7	7	8.67286	6.03495	5.99153	5.85806	5.52761	5.68552	6.56662	6.66613	2.52711	3.94707	4.85131	4.60448	4.30645	3.83801	5.22831
NLTP	-0.830262	-5.03302	0.00029429	2.86273	3.693	0.302049	0.31505	7	7	11.9788	3.46086	3.86474	3.34483	4.18525	3.37387	3.90835	3.71308	2.4396	2.92516	2.81516	3.36998	3.08924	2.68235	2.71764
PSMD4	-1.53535	-5.0301	0.00177321	2.36331	3.89865	0.139066	0.786333	4	7	6.63504	4.13475	3.72207	3.25401	5.56727	3.67493	3.42704	3.51051		2.45234	2.37827	2.16221			2.4604
DDX3X	-1.3514	-5.02364	0.000415528	4.56222	5.91362	0.582646	0.408754	7	7	10.7544	5.68651	5.83156	5.2121	6.27501	6.43994	6.11086	5.83938	4.23945	4.86405	4.19939	5.26045	4.57654	5.16209	3.63359
PHB2	-0.923145	-5.01915	0.000393881	6.78219	7.70534	0.393302	0.286551	7	7	10.9696	7.4352	7.40608	7.93223	7.47959	7.62255	8.09766	7.96404	6.25704	7.10148	6.35571	6.98778	6.53577	7.25831	6.97924
NONO	-1.81797	-5.01177	0.000412971	4.92721	6.74518	0.781709	0.556769	7	7	10.8416	6.99019	6.62746	6.62412	5.64826	6.78869	7.36364	7.17389	3.59077	5.13757	5.97232	5.03724	5.48218	4.2794	4.99101
RL13	-1.58559	-5.00133	0.000557018	6.4188	8.00439	0.717597	0.43431	7	7	9.87559	7.64208	8.31677	8.29117	8.60167	7.4946	8.11738	7.56706	6.86932	7.46923	6.67462	5.95101	5.63524	5.55074	6.78145
P4HA1	-2.21004	-4.97655	0.000336091	3.12787	5.33792	0.879736	0.778837	7	7	11.8262	5.92854	4.94925	4.53696	6.30646	4.2666	5.40068	5.97693	3.76789	2.71597	2.88561	3.87301	1.44661	3.30951	3.8965
FKBP8	-1.91207	-4.97566	0.00053904	2.44597	4.35805	0.730536	0.641167	6	7	10.1096	4.74172	4.8222	4.14119	3.5905	3.72052	4.12796	5.36223	1.7664	2.21307		3.54166	3.01645	1.65539	2.48287
AT11C	-2.11842	-4.9713	0.00440156	-0.181641	1.93678	0.744336	0.549127	4	7	4.91835	1.68958	1.78599	2.24977	0.928889	2.22402	2.01977	2.65941		-1.06788		-0.114099	-0.290466	0.745877
NU155	-2.74693	-4.95332	0.000893345	1.7059	4.45283	1.32271	0.635005	7	7	8.62622	3.45278	3.98465	4.61912	4.73542	4.09684	5.2408	5.04017	0.321063	1.46415	1.6725	4.50859	0.933725	1.52201	1.51925
IF2P	-2.59912	-4.94786	0.00112243	-0.243904	2.35522	0.429336	1.26847	4	7	8.00355	1.26961	2.90487	2.57838	4.44681	0.466665	2.7069	2.11326			-0.297306	-0.81374		0.192631	-0.0571991
SYK	-2.56287	-4.93397	0.000796084	1.54021	4.10307	1.21804	0.636434	7	7	9.0489	4.21838	4.27859	4.07367	5.19513	4.21836	3.59319	3.14418	-0.507399	2.77598	1.33396	0.524177	1.53468	2.67624	2.4438
EMC1	-2.22826	-4.89783	0.000427823	1.23532	3.46358	0.745915	0.944703	7	7	11.3873	2.96842	2.9494	4.26189	3.26532	1.97047	4.66941	4.16017	0.626141	1.68866	0.21889	2.11708	0.559034	1.83356	1.60388
SNP23	-2.63701	-4.89718	0.000369332	2.33968	4.9767	1.02692	0.987486	7	7	11.9816	5.27647	4.22654	6.51165	4.84458	3.41175	5.58954	4.97635	1.34272	1.53961	1.99283	2.74976	3.61613	3.72401	1.41274
FUS	-0.714521	-4.8894	0.000498979	6.85775	7.57227	0.31474	0.224566	7	7	10.8516	7.39566	7.40011	7.92025	7.39395	7.40602	7.71674	7.77314	6.66233	7.09981	6.85788	7.12543	6.46204	7.26308	6.53364
H4	-0.992012	-4.86581	0.00154951	9.02943	10.0214	0.509816	0.17618	7	7	7.41292	10.0058	10.0863	10.1983	9.99253	10.2519	9.85809	9.75712	8.58054	9.43769	9.61895	9.40776	9.20347	8.29998	8.65764
MRRP1	-1.95603	-4.86519	0.00090158	0.4127	2.36873	0.486289	0.847145	4	7	8.95766	2.75083	3.05929	1.57409	2.82346	0.794664	2.70809	2.8707		1.12567	0.0894282	0.116196	0.319507
FXR1	-3.13162	-4.86348	0.000668513	0.825493	3.95712	1.23862	1.05471	6	7	9.94513	2.73161	3.04653	3.17454	4.91888	3.59998	5.13788	5.09039		-0.476981	1.16385	1.54608	-0.0858003	0.0166323	2.78918
LUZP1	-2.23685	-4.86288	0.00183965	-0.171779	2.06507	0.704521	0.78262	4	7	6.98577	2.64938	2.86349	1.06784	3.04143	1.33558	1.65872	1.8391			0.742193	-0.00258638		-0.574702	-0.852022
FBLN3	-1.54919	-4.85609	0.000732786	5.34097	6.89016	0.728749	0.425845	7	7	9.66971	6.3056	6.89913	7.0033	7.417	6.32448	7.06906	7.21252	5.59079	5.77033	5.02589	5.81519	5.92407	5.42562	3.83487
GPX8	-2.71633	-4.84555	0.00113385	3.9728	6.68914	0.53461	1.34151	5	7	8.34581	7.31447	7.13062	7.26217	3.67218	6.99997	6.98104	7.46352	3.69397		4.25365	4.77866	3.4951		3.64264
RL27	-0.953968	-4.83187	0.00147469	7.41763	8.3716	0.489111	0.183378	7	7	7.65411	8.55476	8.16718	8.49198	8.43493	8.09853	8.54361	8.3102	6.36375	7.86029	7.49085	7.57005	7.40222	7.51925	7.71699
LONM	-1.1541	-4.81953	0.000445869	3.07155	4.22564	0.480035	0.413476	7	7	11.7422	4.27506	3.86643	4.3645	3.89238	3.79168	4.4344	4.95506	3.43384	2.4018	3.65634	2.96616	2.90103	2.61224	3.52943
PLOD1	-2.89011	-4.8186	0.000447035	3.05204	5.94215	1.20302	1.03485	7	7	11.7378	4.53107	6.14232	6.26017	6.64472	4.43551	6.57879	7.00247	2.49399	3.8168	1.44475	2.78307	1.94492	4.59996	4.28077
RL6	-1.80784	-4.80113	0.00144338	5.56832	7.37616	0.926913	0.36515	7	7	7.81849	7.70717	7.24241	7.10281	7.46737	7.70099	7.66783	6.74455	5.56592	7.26481	5.28095	5.42654	4.13742	5.41363	5.88897
GLCM	-2.03176	-4.79252	0.000648079	0.529412	2.56117	0.783762	0.735824	6	7	10.4421	1.55313	2.07584	2.36014	2.53626	2.39903	3.21936	3.78444	0.767466	1.02683		1.08584	1.16199	-0.112067	-0.75358
SAFB2	-2.37515	-4.78692	0.0015679	1.26224	3.63739	0.504228	1.06306	3	7	7.6382	5.72427	3.51831	2.55556	2.88073	4.25356	3.33847	3.19087		0.924173		1.02075		1.8418
ACAD9	-2.67854	-4.78607	0.000591526	0.937153	3.61569	1.20709	0.857552	7	7	10.8269	4.05849	3.04387	3.22716	2.37643	3.33406	4.48378	4.78603	-0.538876	2.39791	0.367905	2.54183	-0.160677	0.574295	1.37768
CCD47	-2.23886	-4.78245	0.000609268	2.39738	4.63624	0.703459	0.978144	6	7	10.7351	4.51065	4.38325	5.34795	3.91116	3.02457	5.7471	5.52902	1.37276	1.96318	2.47334	3.46481		2.41199	2.69821
RM37	-2.79447	-4.77745	0.00078256	0.327823	3.12229	0.76043	1.25914	5	7	9.84246	2.58222	2.33368	2.74409	1.84458	2.51473	4.95373	4.88301	0.879499	1.22542	-0.253861	-0.600077	0.388136
SC24A	-1.13821	-4.75316	0.00322309	0.521165	1.65938	0.243198	0.477043	5	5	5.94764		1.23836	1.10578	2.23683		1.77362	1.9423		0.700725	0.237411	0.394804		0.434852	0.838035
EF2	-1.33273	-4.70589	0.000984262	5.07574	6.40848	0.654226	0.365275	7	7	9.40948	6.12928	6.81838	6.3312	7.02708	6.17952	6.27457	6.0993	5.28645	4.56159	5.66079	4.62325	6.15656	4.87585	4.36569
UFO	-1.58885	-4.69327	0.00500575	0.255222	1.84407	0.0569303	0.823359	2	6	5.13917	1.61901	0.866916	2.51334	0.961747		2.83119	2.2722	0.295478					0.214967
GFPT1	-1.83167	-4.68847	0.00418221	-0.256858	1.57481	0.314495	0.84983	2	7	5.52042	1.29911	1.88954	1.44208	3.29116	1.46916	0.944564	0.688044				-0.479239			-0.0344761
FDFT	-2.70144	-4.67049	0.00413544	0.755647	3.45708	0.462146	1.26267	2	7	5.5823	1.14934	4.85869	4.25613	4.42284	3.31807	2.63552	3.559	1.08243					0.428861
RPF2	-1.4867	-4.66615	0.00230617	1.45114	2.93784	0.162415	0.786309	2	7	6.99045	2.02846	2.75853	2.86914	2.8025	2.14547	4.09403	3.86676				1.56598		1.33629
MFN1	-1.58506	-4.66167	0.000709618	0.426608	2.01167	0.525181	0.730396	7	7	10.8956	2.47162	1.36146	2.17553	0.755521	1.94949	2.52001	2.84804	0.67377	0.567892	-0.10617	1.27317	-0.256293	0.185872	0.648015
GBG12	-1.26647	-4.65382	0.00202007	6.9609	8.22737	0.68112	0.233412	7	7	7.39005	8.50365	8.22515	7.87701	8.13746	8.54762	8.09892	8.20178	7.39193	7.59431	7.12012	6.79709	6.97448	5.53873	7.30963
PYR1	-2.06269	-4.6486	0.000932782	-0.703097	1.35959	0.663637	0.872722	5	7	9.90736	0.559267	1.61232	1.40751	2.47231	-0.0706489	2.11858	1.41779		-0.401972	-1.7139	-1.00883		-0.0535323	-0.337249
TRIPB	-1.62284	-4.62716	0.00317641	-0.189665	1.43318	0.562342	0.554652	4	7	6.29055	0.925662	1.22509	1.31577	2.10124	1.1506	2.32958	0.984305				0.653644	-0.475282	-0.45388	-0.483143
MPRI	-2.27109	-4.62495	0.000586708	0.842843	3.11394	0.933157	0.90396	7	7	11.9879	3.34815	2.57656	3.21786	1.44272	3.11091	4.06641	4.03493	0.86554	-0.313974	1.16206	2.51682	-0.0857761	0.635657	1.11957
SEC63	-2.33467	-4.62099	0.000591419	2.53605	4.87072	0.926957	0.963096	7	7	11.9825	4.33985	5.15656	6.54083	3.35944	5.00556	4.61273	5.08006	0.82096	3.3149	3.61062	2.78399	1.93689	2.71158	2.57343
ZYX	-1.93891	-4.61442	0.00305296	2.3465	4.2854	0.962719	0.393173	6	7	6.42243	4.09755	4.74725	3.94396	4.89129	3.92174	4.35246	4.04357		3.87844	1.69083	2.19385	1.05762	2.71014	2.54811
HS105	-2.5598	-4.61353	0.000829774	0.270788	2.83059	0.809144	1.17947	6	7	10.5727	1.28885	2.75029	3.20119	5.01041	1.8068	2.98279	2.77381	-0.456625	0.536694	1.63806	-0.182982	0.542901	-0.453325
EHD4	-2.01542	-4.60368	0.00140212	1.89103	3.90645	0.56783	0.881663	4	7	8.70187	3.2941	5.01156	4.04884	5.23134	3.17107	3.3205	3.2677		1.25766	2.22755	2.49158	1.58732
CLPX	-1.73036	-4.59745	0.00260632	1.01581	2.74617	0.178795	0.957607	3	7	6.87925	3.49754	2.9221	2.91252	1.01318	2.1137	3.95952	2.80464		0.999165	0.845918	1.20234
GOGA3	-2.20253	-4.59245	0.00268173	-0.965927	1.2366	1.07954	0.500466	6	7	6.819	1.94891	1.05381	0.439206	1.06644	1.0526	1.36071	1.73455	-2.46969	-0.299075	0.264429	-0.204754	-1.11823	-1.96824
F120A	-2.21786	-4.58896	0.00119755	-0.653543	1.56432	1.12076	0.615616	7	7	9.31849	1.1736	2.57437	2.15397	1.37137	1.71182	1.07604	0.88908	-2.42469	0.699984	0.334628	-0.0991924	-0.302997	-1.20096	-1.58157
RTN4	-1.40358	-4.57862	0.000834325	5.21251	6.61609	0.66298	0.467193	7	7	10.7802	5.62693	6.96755	6.8954	6.46546	6.67033	6.86092	6.82602	5.69911	5.01902	5.90478	5.71335	4.6853	5.40202	4.06399
IF4G1	-2.68908	-4.57559	0.00135801	1.2361	3.92519	1.38403	0.708683	7	7	8.9439	2.89088	4.76124	3.96896	4.72906	3.87522	4.08062	3.17033	-0.492482	3.57501	1.42075	1.0877	1.75811	-0.353992	1.65762
RS6	-1.52926	-4.55068	0.001935	5.05751	6.58677	0.824672	0.332305	7	7	7.89841	6.79119	7.10165	6.52664	6.80828	6.37399	6.38449	6.12115	3.7481	5.82245	5.57306	4.5691	4.46605	5.21695	6.00686
SPTC1	-1.56645	-4.5427	0.00118752	3.93279	5.49924	0.790086	0.456189	7	7	9.60041	5.5861	4.78288	5.83852	4.98708	5.48689	6.00274	5.81045	3.3999	4.60023	3.76098	4.69868	2.5552	3.87545	4.63906
NUDC	-2.71257	-4.52601	0.00217832	1.20076	3.91333	0.609533	1.28354	3	7	7.63424	2.35232	4.29955	4.52852	5.51142	5.00716	3.51674	2.1776		1.32809		0.537618	1.73657
OPA1	-2.08915	-4.51209	0.000804649	0.764306	2.85346	0.762386	0.958869	7	7	11.42	2.94488	2.26985	3.49849	0.948094	3.28665	3.3354	3.69085	0.645583	0.0189361	1.01926	2.16295	-0.175047	0.877339	0.801122
CAPR1	-2.44654	-4.51164	0.00181924	3.75647	6.20301	1.31222	0.58009	7	7	8.25882	5.81543	5.88519	6.11756	7.03417	5.66886	7.02544	5.87442	3.71535	5.51818	2.34997	4.6781	1.80286	4.51809	3.71274
RL18A	-1.51373	-4.50562	0.00158037	5.88339	7.39712	0.797015	0.393537	7	7	8.76148	7.99255	7.65442	7.56448	7.50872	6.95821	7.18375	6.91769	5.91662	7.20238	6.48535	6.06242	5.49647	4.98117	5.03932
TOIP1	-2.03511	-4.49377	0.000856644	2.82561	4.86072	0.94866	0.731924	7	7	11.2743	5.17633	4.48155	5.1678	3.39277	4.89537	5.53524	5.37602	3.12992	2.11358	3.62098	3.63085	2.54381	1.1403	3.59983
RS18	-1.14488	-4.48727	0.00210353	6.87576	8.02064	0.626162	0.252177	7	7	7.89645	7.73272	8.19038	8.00993	8.38393	8.11337	8.05154	7.66258	6.30604	7.87576	6.4516	6.26816	7.56121	6.78162	6.88592
IF4A1	-2.71833	-4.47942	0.000772943	2.28023	4.99856	1.1925	1.07508	7	7	11.8733	3.8283	5.41224	4.66983	6.54299	3.77816	6.12808	4.63033	2.84892	3.81088	0.97695	1.14956	3.26285	2.88186	1.03061
G6PI	-1.84514	-4.477	0.00312687	2.04176	3.8869	0.640626	0.686148	4	7	6.76811	3.89479	4.46845	3.12435	5.01759	4.02218	3.41502	3.26592		1.86785	2.17514	2.83091	1.29315
SSFA2	-2.57546	-4.47608	0.0077739	0.209649	2.78511	1.0224	0.698688	4	7	4.64926	3.19529	2.36278	2.99551	1.50389	3.71707	2.95179	2.76941	0.699164			1.26311		-0.0158992	-1.10778
RS16	-1.91474	-4.46299	0.00201748	5.63585	7.55059	1.04321	0.447377	7	7	8.1347	7.4723	8.09467	7.58405	8.02209	6.97156	7.71755	6.9919	4.93166	7.36985	5.08084	4.87245	6.89005	5.37346	4.93267
PRKRA	-1.8792	-4.45338	0.00167421	-0.700681	1.17851	0.534324	0.864168	4	7	8.81908	0.388111	0.752796	0.60977	0.261486	2.1205	1.86565	2.25129			-1.06502	-1.16507		0.000660415	-0.573297
SF3A1	-1.80116	-4.44643	0.00162271	0.564603	2.36576	0.681573	0.705883	5	7	8.96782	1.30721	2.24855	1.66694	3.28755	2.38161	2.63664	3.03184		1.0401	0.0943352	0.0141137	0.144692	1.52977
NOP56	-2.9913	-4.44315	0.0152126	1.39729	4.3886	1.29436	0.490791	4	7	3.50138	4.35733	4.63778	4.60425	3.689	3.74229	4.7661	4.9234	0.152017	3.20178	1.29494	0.940434
RL35A	-1.43512	-4.4351	0.00289424	4.90555	6.34066	0.718399	0.361695	6	7	7.12835	6.09283	6.15824	6.35195	6.49034	7.07585	6.01107	6.20438	4.89011	5.40069		5.61611	3.56382	4.88516	5.07739
DHB4	-1.50866	-4.42509	0.000833879	3.91808	5.42674	0.620449	0.654748	7	7	11.9654	4.93398	4.9201	5.09355	5.05126	5.39966	5.89771	6.69091	3.34057	3.88069	3.80282	4.90443	3.03151	4.27781	4.1887
FA98A	-2.71086	-4.42264	0.00157975	1.0566	3.76746	0.692309	1.39962	5	7	9.19596	1.37174	4.44738	5.56775	3.79937	2.69768	4.84037	3.64791	0.942598	2.24788	0.443391	0.850107			0.799007
IF4G2	-1.69604	-4.41488	0.000898694	0.401265	2.0973	0.775775	0.656695	7	7	11.6815	0.765504	2.88137	1.99439	2.3078	2.30948	2.40252	2.02005	-1.05585	1.09646	1.18236	0.287354	0.351846	0.0440729	0.90261
RL4	-1.05806	-4.4111	0.00137546	6.84117	7.89923	0.544615	0.325785	7	7	9.8066	7.62505	8.20001	8.06035	8.18177	7.34835	8.1108	7.76827	6.09123	7.81427	7.04059	7.08572	6.51457	6.61572	6.72606
RM41	-2.91222	-4.39915	0.00406511	2.23593	5.14814	0.233153	1.72961	5	7	6.30304	7.14333	2.58233	5.63347	2.88657	6.29392	5.76886	5.72853		2.37531	2.10245	1.88845		2.4304	2.38302
COPD	-2.01967	-4.38439	0.00281611	1.41798	3.43765	1.15251	0.396364	7	7	7.39973	3.42591	3.75441	3.28345	4.01904	3.63974	2.93128	3.00974	0.0803932	2.8037	0.0894107	0.786192	1.50298	1.87364	2.78956
ACOT9	-1.98419	-4.36363	0.00257997	3.25767	5.24186	1.12177	0.434686	7	7	7.76213	5.11538	4.89201	4.75269	5.20644	5.04605	5.82631	5.85412	1.84301	5.00523	2.28025	4.38584	2.76205	3.1606	3.3667
DNMBP	-0.992655	-4.3564	0.016184	0.919984	1.91264	0.437972	0.140819	4	5	3.49878		2.11416	1.95979	1.7269		1.87969	1.88266			1.03103	1.49069		0.528966	0.629251
CRNL1	-2.26623	-4.35637	0.00109038	-0.153783	2.11245	0.835699	1.09359	7	7	11.2256	0.620083	1.65876	1.70328	1.58351	2.40945	4.06198	2.75007	-0.615632	1.07565	-0.467726	-1.38275	-0.556333	0.414052	0.456258
RRAS2	-2.28056	-4.35614	0.001444	0.448101	2.72866	0.769262	1.04407	5	7	9.95799	4.14668	1.44533	3.40954	3.62123	2.81341	1.76847	1.89595		-0.328447	1.47065	0.950193	0.379428		-0.231319
MAP1B	-2.97004	-4.3504	0.00142924	0.0922442	3.06228	1.53365	0.954214	7	7	10.04	2.32992	3.42865	2.84552	4.73227	2.02952	3.70163	2.36848	1.23439	0.124464	2.48795	-1.30675	0.861526	-1.69075	-1.06512
ERH	-0.781187	-4.34034	0.00195247	7.56043	8.34162	0.368854	0.260821	6	7	8.84959	8.46071	8.51762	8.167	8.00757	8.77725	8.17362	8.28755		7.97555	7.2167	7.67464	7.02266	7.62353	7.84952
RL7	-1.36037	-4.33983	0.000967295	5.44925	6.80962	0.571746	0.600758	7	7	11.9707	7.01419	7.10635	5.94461	6.03056	6.8035	7.48501	7.2831	5.16803	6.6082	5.35791	5.5418	5.55151	4.8354	5.0819
DNJC3	-2.26526	-4.32427	0.00253181	1.04597	3.31123	1.28049	0.53033	7	7	7.99952	2.58596	2.87479	3.53727	3.97396	3.05751	3.20196	3.94714	0.524908	1.9949	-0.177171	2.54035	-0.373049	2.56006	0.251804
CE170	-2.52167	-4.32198	0.00389712	-1.27363	1.24804	0.629022	1.11856	3	6	6.66222		1.01942	0.922347	2.77197	-0.570927	1.90269	1.44272			-0.880049	-1.99909	-0.941761
RRP12	-1.47735	-4.3032	0.011587	-0.238342	1.23901	0.0959814	0.760137	4	5	4.15882		0.654335	0.218155	1.822		1.92998	1.57058	-0.183541			-0.318175	-0.131095	-0.320555
CTND1	-1.76139	-4.30041	0.00154549	2.73144	4.49282	0.920017	0.572618	7	7	10.042	4.18436	4.47505	4.60554	4.41513	3.48695	5.1324	5.15032	2.19799	4.31119	2.09649	3.59706	1.76561	2.86284	2.28887
NBAS	-2.11161	-4.29314	0.0030856	0.111853	2.22346	1.2268	0.434084	7	7	7.47921	1.77067	1.65977	2.1396	2.37207	2.25664	2.40371	2.96177	-1.86978	0.595356	-1.00562	1.92196	0.121206	0.626671	0.393175
RM45	-2.77192	-4.28609	0.00285793	0.0154234	2.78735	0.577608	1.59328	6	7	7.76205	2.49137	1.21097	2.31699	2.84368	0.914513	5.23923	4.49468		0.91514	-0.556163	0.4422	-0.167617	-0.546913	0.00589385
ZO2	-2.13014	-4.24715	0.00196849	0.26834	2.39848	1.16096	0.642657	7	7	9.36146	2.15609	2.91541	1.25444	2.75661	2.97588	2.80104	1.92992	-1.24738	1.67223	0.945736	0.848411	-1.34513	0.108154	0.896357
SCRIB	-1.58427	-4.24138	0.00287186	1.00711	2.59137	0.56034	0.660272	6	5	7.95101		1.77567	3.23888	2.00841		3.10339	2.83052	0.761555	0.425079	1.66901	1.68412	1.01946	0.483424
RALY	-1.64123	-4.23841	0.00364216	5.73955	7.38078	0.977448	0.306938	7	7	7.1719	7.48412	7.78107	7.3132	7.00421	7.66411	6.97598	7.44277	5.79705	6.58423	3.78992	5.82515	6.72597	6.06925	5.38527
MTA3	-0.375972	-4.23169	0.0129013	1.82509	2.20106	0.0113572	0.197854	2	5	4.06507		1.9474	2.08795	2.17702		2.43183	2.36109		1.81705					1.83312
RCC1	-1.73742	-4.22909	0.0720697	1.12375	2.86117	0.511245	0.478074	2	6	1.64006		2.24597	2.75794	2.3958	3.07027	3.44426	3.25279			1.48525	0.762245
TECR	-2.42087	-4.22423	0.00126147	2.9015	5.32237	1.1631	0.97275	7	7	11.6361	6.51693	5.84406	4.61003	3.54472	5.51857	5.38134	5.84093	3.28704	1.0993	3.30366	3.76416	1.46227	3.20859	4.18548
RM22	-2.4181	-4.22182	0.00863576	1.70427	4.12237	0.493276	1.20199	2	7	4.91395	5.91928	2.127	4.30851	3.15945	4.52745	4.69881	4.11608				1.35547			2.05307
PR38A	-1.98761	-4.18249	0.0047031	1.90025	3.88787	0.184572	1.2253	3	7	6.59668	1.71567	4.99792	3.59698	2.86042	4.5497	4.7131	4.78128		2.08046		1.9087			1.7116
DDX1	-1.58343	-4.17335	0.00129396	3.18113	4.76456	0.69957	0.719927	7	7	11.9901	3.60089	4.93759	4.49321	5.3326	4.11315	5.43356	5.44095	2.6703	4.07544	3.00233	3.37977	2.02854	3.86805	3.24348
P5CS	-2.16531	-4.17268	0.00148128	1.65596	3.82127	0.836711	1.08853	7	7	11.2554	2.91936	3.9643	3.25661	4.53465	2.16809	5.22989	4.67599	1.06023	2.10326	1.33594	3.27658	1.07274	1.82683	0.916119
CD59	-0.715066	-4.14651	0.00412967	7.96167	8.67674	0.43582	0.135032	7	7	7.14144	8.71283	8.5102	8.62194	8.62711	8.94337	8.62021	8.70149	7.84821	8.29111	8.32149	8.45632	8.01641	7.33569	7.46244
PREP	-1.84386	-4.1398	0.00173163	1.96895	3.81282	0.965802	0.675194	7	7	10.7341	3.53135	3.41546	3.91333	4.04163	2.67656	4.41262	4.69876	2.4688	2.08164	1.24493	3.45262	0.416644	1.75674	2.36129
UPAR	-2.86919	-4.1391	0.00794272	1.19295	4.06214	0.897567	1.21812	3	7	5.30228	3.43082	5.26094	5.12017	5.22799	4.11847	3.15336	2.1232		0.419935	2.17734	0.981573
ATP5I	-2.13214	-4.13858	0.00163019	4.26357	6.39571	0.810964	1.09556	7	7	11.057	6.24274	6.49474	7.04024	6.13707	4.5282	6.15867	8.16832	4.07242	5.84897	3.91978	4.63578	4.16955	3.2473	3.95121
RL32	-2.03625	-4.13586	0.00751363	6.07676	8.11301	1.1798	0.26997	6	7	5.44974	8.22359	8.45173	8.20892	8.26854	8.0526	7.97764	7.60805	5.68289	7.73873	4.61047	5.86904	7.2196	5.3398
CLPT1	-1.79408	-4.11525	0.0150717	1.08057	2.87466	0.626667	0.643508	3	7	3.94739	2.26553	2.72797	3.7612	2.5946	2.07711	3.08044	3.61576			1.27953	0.378582		1.58361
WDR3	-2.5458	-4.11337	0.00401127	0.181337	2.72714	0.49345	1.54831	6	7	7.38186	-0.0947006	2.28616	3.92641	3.16957	1.69517	3.99065	4.11672	-0.423393	0.510691	0.867718	0.278596		0.185614	-0.331203
HNRPK	-0.694495	-4.11056	0.00341656	6.70504	7.39954	0.413485	0.169849	7	7	7.96876	7.20373	7.37838	7.17815	7.49081	7.37459	7.52584	7.64527	5.94126	7.24517	6.48565	6.9115	6.94955	6.69247	6.70969
ITA5	-1.28767	-4.10577	0.00148757	6.04566	7.33332	0.556396	0.615583	7	7	11.8794	6.50725	7.34328	7.8212	7.43789	6.47382	7.96662	7.7832	5.15223	6.13043	5.68606	6.84194	5.77277	6.42421	6.31194
TADBP	-1.52957	-4.10415	0.00152616	4.18128	5.71084	0.746566	0.644136	7	7	11.7478	6.3093	4.47091	5.57482	5.42493	6.3335	5.86486	5.99757	3.94202	5.3534	3.55738	3.84864	4.00513	3.45591	5.10646
RS3A	-1.47638	-4.09121	0.00370891	6.1167	7.59308	0.89021	0.3451	7	7	7.76355	7.77348	8.0017	7.70456	7.70134	7.69495	7.31922	6.95627	4.74361	7.56106	6.54325	5.71305	6.466	5.56476	6.22516
HXK1	-1.70909	-4.09036	0.00251741	4.47848	6.18758	0.968454	0.533098	7	7	9.33034	5.68696	5.98516	6.53212	6.04322	5.46879	6.72369	6.87309	4.11944	4.617	5.23449	5.0017	2.44598	5.08543	4.84533
NUP37	-2.10251	-4.08851	0.00453103	0.960481	3.06299	0.335753	1.30128	5	7	7.07832	4.50975	2.82583	1.21716	4.75076	3.65163	2.42086	2.06493		0.987739	1.42907	0.48058		0.943233	0.961785
GNPAT	-1.5221	-4.08566	0.00526218	-0.0306624	1.49144	0.146185	0.960042	3	7	6.60874	0.897477	0.225194	2.09224	0.423932	1.87146	2.33502	2.59477			0.063855	-0.199041			0.0431985
GOGA2	-2.41692	-4.04942	0.00225213	1.63123	4.04816	1.33326	0.846211	7	7	10.1591	4.59927	3.35407	4.97257	2.75908	3.44586	4.51381	4.69246	0.627387	0.436512	2.02647	3.5374	-0.0751228	2.08408	2.78191
PLXA2	-2.96111	-4.04017	0.0203514	-0.342041	2.61907	1.40966	0.531654	4	7	3.49596	3.0629	2.154	3.18775	2.89549	2.00327	3.00595	2.0241		-1.56589		1.36164		-1.43224	0.268326
AMRP	-2.02878	-4.03923	0.00294727	1.16278	3.19156	0.844463	0.876098	5	7	8.97727	3.21229	3.08074	3.88249	3.63424	3.95057	1.36332	3.21728	1.46588		1.32977	0.286655		2.33603	0.395581
DDX50	-1.25436	-4.03389	0.101499	0.922223	2.17658	0.405932	0.292947	2	6	1.36909	2.26311	2.1289	2.4751	2.47054		2.01013	1.71172		1.20926		0.635186
PLXD1	-2.22123	-4.03295	0.00199399	0.713878	2.9351	0.946	1.03892	6	7	10.9391	2.87191	2.75387	3.42402	2.45706	1.02153	3.95929	4.05806		0.795273	0.763139	2.42557	-0.386265	0.184845	0.500703
ECI2	-2.53969	-4.02618	0.0020287	2.38035	4.92005	1.09299	1.17965	6	7	10.9075	3.69902	4.60111	6.26684	5.63757	3.09625	5.92866	5.21087		2.82803	2.05639	4.14308	1.28867	1.25737	2.70857
MPPA	-2.42116	-4.01136	0.00173208	1.10266	3.52382	1.15289	1.10498	7	7	11.9784	1.9293	4.62735	2.21321	4.44123	3.1512	4.3492	3.95524	0.300011	1.98507	0.562681	2.48238	-0.845862	1.74105	1.49327
PHF14	-1.66246	-4.00444	0.0102703	3.09969	4.76215	0.00800445	1.01682	2	6	5.00186	5.42973	5.2323	5.43275		5.49514	3.11285	3.87011			3.10535	3.09403
RS20	-1.02432	-3.99587	0.00317834	6.20148	7.22581	0.523158	0.375076	6	7	8.93158	7.50721	6.8157	6.97021	7.78585	7.50519	7.13262	6.86386	6.36353	6.80813	5.92044	5.32695	6.5616	6.22823
BZW1	-2.5754	-3.99468	0.00958963	2.26034	4.83574	1.34524	0.61318	5	7	5.199	5.5034	5.16892	4.01958	5.20379	5.05232	4.97777	3.92441	1.47778		4.1954	0.922057	1.62059	3.0859
F213A	-0.604154	-3.99066	0.00179174	7.24794	7.85209	0.284245	0.282209	7	7	11.9994	7.54545	7.82311	8.37707	7.59629	7.71055	7.96784	7.94433	7.04869	7.20221	7.08907	7.63831	6.8509	7.34488	7.56149
RS28	-1.48109	-3.98867	0.00181188	6.69595	8.17703	0.716377	0.672291	7	7	11.9519	6.88393	8.26993	8.51999	8.4734	9.05171	8.09553	7.94474	5.99462	7.93623	7.29631	6.22876	6.13788	6.91491	6.3629
HNRPD	-1.48889	-3.9877	0.0023526	5.23503	6.72391	0.548121	0.821826	7	7	10.4562	5.94104	6.0554	6.10989	7.03557	6.36135	7.51045	8.0537	5.05527	4.70078	5.43152	5.50626	4.71936	6.25495	4.97707
STXB3	-1.97278	-3.97942	0.00539978	1.30297	3.27575	1.1092	0.533817	6	7	6.95393	2.86666	3.06584	3.48939	3.32428	2.42787	3.82406	3.93211		1.93563	-0.237646	2.72226	1.20996	0.297776	1.88983
C1TC	-2.00065	-3.97026	0.00541541	0.0789095	2.07956	0.285172	1.27873	4	7	6.98406	-0.0576704	2.17007	1.6755	4.3087	2.23991	2.30394	1.91648			-0.346291	0.248875		0.177262	0.235791
P3H3	-2.12611	-3.95273	0.00362333	1.17975	3.30585	0.705323	1.07454	4	7	8.63774	2.11635	2.7052	3.37474	4.84905	2.02976	3.83264	4.23322		1.66893		0.882576		1.84084	0.326644
AFAP1	-1.89741	-3.94436	0.00591282	0.146337	2.04374	0.432157	1.07903	5	6	6.79539	2.6675	2.94217	1.18494	3.23996		1.71716	0.510734	0.516255	-0.598688		0.272116		0.206835	0.335165
ALG5	-1.30509	-3.94184	0.0076099	2.94991	4.255	0.189138	0.741882	2	6	5.99947	4.91949	5.01965	4.16674		4.66582	3.46541	3.29287				2.81617			3.08365
RL37A	-0.394032	-3.93792	0.0056337	6.81937	7.2134	0.0510017	0.246944	2	7	6.99042	7.35928	7.46602	6.94645	7.49716	6.9736	7.29312	6.95815		6.85543			6.7833
CD9	-0.739429	-3.93364	0.00198601	7.32302	8.06245	0.353579	0.349751	7	7	11.9986	8.15665	7.78784	7.47155	8.50823	7.99462	8.35867	8.15958	6.94128	7.10459	6.97633	7.92329	7.29099	7.4707	7.55394
MPCP	-1.56971	-3.92999	0.00401528	6.32703	7.89674	0.963518	0.43402	7	7	8.33861	8.19235	7.7583	8.11762	7.00734	8.2737	7.836	8.09186	5.57923	5.4359	7.53611	7.53553	5.30323	6.12073	6.77846
NOP14	-2.15602	-3.92666	0.00590122	-0.547109	1.60891	0.260756	1.39704	3	7	6.87875	0.90653	1.30783	0.551289	3.1346	-0.454567	3.05833	2.75835	-0.420144		-0.374152	-0.847031
SF3B1	-1.95993	-3.91492	0.00276926	1.38222	3.34215	1.11464	0.715534	7	7	10.2272	2.04589	3.52162	3.52415	3.49774	2.75128	3.94234	4.11204	-0.0906041	2.42433	0.159158	2.3234	0.669799	1.71082	2.47865
CPNE2	-1.78121	-3.91172	0.00302929	0.0952021	1.87641	0.700269	0.87458	5	7	9.78275	0.913349	1.38865	1.48994	1.39737	1.74658	3.23426	2.96475	-0.206138	-0.279516	-0.345495	1.32904			-0.0218838
WDR75	-1.96782	-3.90685	0.00446861	2.19487	4.16269	0.414688	1.21447	4	7	8.02965	2.62449	4.23619	5.07478	4.20175	2.42114	5.47592	5.10458		2.07002		1.6697		2.60123	2.43855
SMD2	-1.77594	-3.90065	0.00501524	5.61343	7.38937	0.989642	0.555358	6	7	7.60198	7.85554	7.36066	7.11373	7.12357	8.23604	7.51457	6.52148	4.72332	7.37664		5.69075	5.10735	4.82782	5.9547
SC31A	-1.74261	-3.89712	0.00573434	2.43711	4.17972	1.13121	0.34639	7	7	7.11539	4.40044	4.21954	3.51713	4.64535	4.24015	4.15255	4.08285	0.977547	4.41791	2.15829	3.39851	1.99002	1.79831	2.31916
RS9	-0.524586	-3.89394	0.00398751	7.40266	7.92725	0.321677	0.153517	7	7	8.59831	7.68089	8.14999	7.79766	7.92149	8.04256	7.95247	7.94568	7.31896	7.80871	6.85776	7.37297	7.33742	7.34173	7.78109
HGS	-1.72052	-3.88037	0.00364448	0.344147	2.06467	0.737387	0.784177	5	7	9.10966	3.05334	1.78317	0.60527	2.36964	2.59501	2.27344	1.7728		1.11184	0.984823	0.278749		-0.694125	0.0394422
GAR1	-1.42106	-3.87973	0.00270925	4.65358	6.07464	0.796765	0.551613	7	7	10.6771	5.11125	6.49159	5.55959	6.337	6.00316	6.45742	6.56245	4.60124	3.58917	4.72496	5.13052	3.7113	4.95521	5.86265
RTCB	-1.064	-3.87576	0.00440194	4.57631	5.64031	0.663749	0.294948	7	7	8.28062	5.55654	6.27367	5.67475	5.59094	5.46494	5.54694	5.3744	3.8131	5.2604	5.05535	4.07928	3.82976	5.31686	4.67942
GALT1	-1.95004	-3.87535	0.00258787	3.5618	5.51183	0.843907	0.970323	6	7	10.991	6.87493	4.937	5.45199	3.90871	5.74651	5.27184	6.39184	4.18228		4.48971	4.00192	2.57271	3.62928	2.49488
SAFB1	-2.3405	-3.86267	0.00333846	1.50195	3.84245	0.94663	1.14695	5	7	9.68643	5.02307	2.20493	2.91488	2.91403	4.89463	4.16178	4.78382	1.70412		0.324937	2.67524	2.01994	0.785523
RS8	-0.864368	-3.85744	0.00267505	7.35816	8.22253	0.478935	0.349426	7	7	10.9773	7.98915	8.30513	8.42061	8.65306	7.63809	8.49883	8.05282	7.62702	8.11049	7.19584	7.01364	7.41608	7.53345	6.61058
NDUBA	-2.06903	-3.8573	0.00541823	4.39619	6.46522	1.33522	0.480841	7	7	7.5305	7.10186	5.94129	6.69443	5.97368	6.20188	6.31206	7.03132	2.3985	5.85202	4.68288	5.48984	5.19502	4.39297	2.76209
AT5F1	-1.61178	-3.85592	0.00229391	5.38108	6.99287	0.799591	0.764027	7	7	11.9752	7.20411	7.2294	7.40905	5.41022	7.68564	6.65681	7.35481	5.22158	6.11343	5.41352	5.97987	6.15922	3.97488	4.80508
ADA10	-1.86079	-3.85136	0.00259808	0.694261	2.55505	1.016	0.775747	7	7	11.2212	3.00773	2.34317	1.20983	1.89064	3.24532	2.93349	3.25515	1.07335	0.356291	1.02956	2.66998	-0.309927	-0.0172369	0.057812
RM49	-2.09266	-3.83807	0.00239793	3.40791	5.50056	1.06713	0.970677	7	7	11.8939	6.65977	4.24158	5.91802	4.91352	4.43065	6.45661	5.88378	2.42693	5.09138	3.65381	3.79751	4.18041	2.35287	2.35242
RT23	-2.19385	-3.83745	0.00370199	2.41	4.60385	0.666707	1.29056	5	7	9.36098	6.78024	3.65444	3.94215	3.38869	3.86127	5.97826	4.62193	3.5905	2.01115		2.03564		2.17282	2.23991
VIGLN	-1.90017	-3.83585	0.0023788	1.21946	3.11963	0.905552	0.94748	7	7	11.9755	2.03417	3.62348	2.41174	4.68296	2.5532	2.69782	3.83402	0.217175	1.68783	1.9783	1.69079	0.223709	0.40437	2.33405
SMCA5	-2.51642	-3.83495	0.00961886	-0.291339	2.22509	1.33582	0.718213	5	7	5.66147	1.65769	1.43191	1.76051	3.4011	2.93904	2.32158	2.06376		0.769664	-1.2461	1.50042		-1.02963	-1.45105
NU205	-2.19574	-3.83069	0.00480182	-0.482436	1.7133	1.39102	0.604103	7	7	8.18553	1.04411	1.72245	1.73282	1.24266	1.25363	2.30535	2.6921	-0.966629	-0.972944	-0.863746	1.78396	-2.56868	-0.530458	0.74145
UFL1	-1.62291	-3.82478	0.00420743	1.33824	2.96114	1.00392	0.502433	7	7	8.82822	2.29679	2.82083	3.02342	2.95686	2.46167	3.6932	3.47525	0.403893	2.1171	0.822846	2.31138	-0.212658	2.25417	1.67093
DJB12	-2.07623	-3.821	0.00408392	0.706926	2.78315	0.630002	1.17141	4	7	8.9997	5.10962	2.91851	2.00134	2.03287	3.41812	2.02338	1.97824	0.140401		0.294198	0.864933		1.52817
SFXN1	-2.08982	-3.81892	0.00273425	4.18412	6.27395	1.14777	0.882515	7	7	11.257	6.82458	6.26654	6.39743	4.36115	7.01796	6.43529	6.61468	3.35413	3.52271	2.68405	6.04223	3.93258	4.71392	5.03923
CKAP4	-0.986821	-3.81713	0.00337212	7.093	8.07982	0.581071	0.360831	7	7	10.0283	8.25463	8.15215	8.36643	7.34985	8.41324	7.94118	8.08128	6.57044	7.01221	7.59974	7.70073	6.10097	7.23253	7.4344
MIA3	-1.93252	-3.79935	0.00425411	0.796122	2.72864	1.19696	0.61508	7	7	8.96218	3.09738	2.52814	3.04323	1.4438	2.77515	2.93844	3.27436	-0.26896	-0.839299	0.989575	2.75232	1.26741	1.4266	0.245201
SYLC	-2.05303	-3.79233	0.00276942	0.700064	2.75309	1.1155	0.898427	7	7	11.4787	1.72834	2.95856	2.74489	4.27531	1.67815	3.26388	2.6225	-1.01365	2.04206	1.82933	-0.076625	1.43883	0.490472	0.190031
NEB2	-1.5395	-3.78005	0.00655863	0.289513	1.82902	0.443543	0.837883	3	7	7.18986	1.23764	1.09849	1.79971	2.16808	3.30554	0.91671	2.27696		0.163258	0.782496	-0.0772145
FAS	-1.97474	-3.77802	0.00689669	0.341586	2.31633	0.386118	1.32792	7	7	7.00737	0.651118	2.45305	1.96568	4.42708	0.9053	3.4178	2.39426	0.515988	-0.13411	-0.124072	0.59756	0.218702	0.922592	0.394447
RENT1	-2.1333	-3.77682	0.00266394	0.594878	2.72818	1.01644	1.09551	7	7	11.9333	1.14596	2.59385	2.6125	4.22878	1.58914	3.59665	3.33034	-0.313237	1.84247	0.872924	1.31312	-0.980791	0.117706	1.31196
RM09	-2.23998	-3.76716	0.00542231	2.65325	4.89323	0.530361	1.4426	5	7	8.05301	6.55068	3.97333	5.40647	3.26072	3.04265	6.16515	5.8536	2.57259	3.42048	1.92601	2.66194		2.68525
STRN3	-1.23159	-3.76522	0.0115586	0.528693	1.76028	0.256306	0.672939	4	5	5.34773		1.98746	2.40161	2.26849		1.33892	0.804951		0.607983	0.70795	0.149185	0.649653
CBX5	-2.21347	-3.76403	0.0183491	4.8956	7.10907	1.30198	0.217882	5	7	4.16052	7.36073	6.91524	7.17049	6.85654	7.42382	7.03905	6.99763		5.74392	3.78789	4.90117		3.47304	6.57198
PABP4	-2.25767	-3.75424	0.0141751	3.47605	5.73372	1.2815	0.482033	5	7	4.81656	5.3611	6.71671	5.37067	5.9615	5.55057	5.70848	5.46698		5.46683	1.95176	3.65524	3.00885		3.29756
FBRL	-2.13636	-3.75412	0.00396181	4.26717	6.40353	0.886763	1.07982	5	7	9.70349	4.53415	6.92237	6.17339	7.15042	5.50144	7.65944	6.88352		4.38389	3.97543	5.31059		4.72205	2.94391
DDX47	-1.6561	-3.74509	0.00964289	0.741634	2.39773	0.542783	0.825461	3	7	5.9735	0.702967	2.22225	2.68921	3.16836	2.26341	3.01781	2.72011		0.907576	0.13525		1.18208
CTNA1	-1.11984	-3.74413	0.00594756	5.35045	6.47029	0.73701	0.288105	7	7	7.79189	6.11322	6.73176	6.6829	6.3936	6.07205	6.52998	6.76848	5.03624	6.68189	5.48742	5.92631	4.65749	4.73371	4.93009
EMC8	-2.62203	-3.74267	0.00325108	0.471452	3.09348	1.15618	1.36972	6	7	11	1.50171	1.91576	4.46302	3.47667	1.62461	4.15357	4.51905		-0.58457	-0.166672	1.52254	-0.681283	2.11611	0.622582
RBM14	-2.60656	-3.74127	0.00606513	2.75678	5.36334	1.27123	1.06552	5	7	7.72495	6.49904	4.47572	3.46279	5.30922	6.24134	5.82818	5.72707		1.23271	2.49142	4.18042		3.93398	1.94539
ITB1	-1.29354	-3.73249	0.00815851	6.28761	7.58114	0.894721	0.200515	7	7	6.60118	7.63404	7.68525	7.4335	7.18839	7.72582	7.66791	7.7331	6.31091	6.52032	5.55044	7.19509	4.66755	7.03351	6.73544
RAC1	-0.636254	-3.72999	0.00881814	6.38935	7.0256	0.17672	0.326261	4	5	6.3357		6.92851	7.49218	6.6497		6.85948	7.19815	6.30497	6.54307	6.1807	6.52866
ATD3B	-1.58464	-3.72832	0.00975559	-0.102243	1.4824	0.00206242	1.12451	2	7	6.00014	0.884321	1.90531	2.75028	-0.532975	0.996483	2.46347	1.90991		-0.100784		-0.103701
PB1	-1.01657	-3.72579	0.00609496	0.229918	1.24649	0.200659	0.65358	3	7	7.79787	0.255642	0.825934	0.78323	1.66339	2.18271	1.46575	1.54874		0.0470862	0.198073	0.444595
MARE1	-2.05401	-3.7178	0.00883485	3.27523	5.32924	1.26816	0.510277	6	7	6.38165	5.68067	5.64113	4.89008	5.9992	5.09997	5.45849	4.53517	4.55359	4.96923	2.60868	3.42286		1.87313	2.2239
GALT7	-2.61265	-3.71649	0.0177076	-0.531151	2.0815	1.27401	0.786701	4	7	4.34658	2.05739	1.27726	2.78561	1.11785	1.59367	2.58458	3.15413		-1.35921	-1.5722	1.22592	-0.419116
NLE1	-0.832072	-3.70881	0.0173461	1.80024	2.63231	0.198139	0.429209	2	6	4.4147	1.77297	2.844	2.66825	2.90728		2.84667	2.75467				1.66013		1.94034
RDH14	-1.61193	-3.70862	0.0170649	-0.312259	1.29967	0.150807	0.94219	2	5	4.45568	1.41779	2.66798			1.50998	0.752113	0.150491				-0.205622	-0.418896
AT2C1	-2.38743	-3.70753	0.00760607	-0.159419	2.22801	0.718456	1.30315	3	7	6.98631	4.34767	1.70152	2.62314	0.0677329	2.39338	1.69803	2.76461			-0.280002	-0.809954			0.611699
PRP8	-2.25404	-3.70514	0.0067885	2.05881	4.31286	1.51852	0.53364	7	7	7.4597	3.62116	4.1482	4.47683	4.22056	3.77876	5.05231	4.89217	-0.303618	3.86818	1.41718	2.9728	0.629411	2.57623	3.25151
ETFD	-1.4868	-3.69653	0.00421494	2.24038	3.72718	0.605466	0.786906	5	7	9.88345	3.20274	3.50884	3.84977	3.34364	2.68494	4.91015	4.5902		2.47221	1.65937	3.16742		1.79544	2.10747
PLRG1	-1.86323	-3.69564	0.00764204	0.599959	2.46319	0.948282	0.667852	5	6	7.02933		1.99431	3.03985	2.13742	3.48007	1.73325	2.39422		0.234174	2.2301	0.604112		-0.0591044	-0.00948346
TMEM2	-1.96654	-3.69397	0.00597335	-0.178952	1.78759	0.950704	0.847655	5	7	8.0928	2.67743	1.68886	0.975871	0.396837	1.87213	2.57159	2.33043	-0.803402		-1.01776	-0.775088		0.699263	1.00223
BAX	-2.48326	-3.69204	0.00441875	1.94766	4.43092	0.833605	1.48117	5	7	9.65368	6.55893	4.70837	4.74383	1.89982	5.45132	3.4509	4.20329			1.21891	2.53249	1.28869	1.59084	3.10737
CH10	-1.23681	-3.68956	0.00870391	7.49844	8.73525	0.866769	0.187902	7	7	6.5627	8.94695	8.93748	8.56994	8.43844	8.73433	8.8287	8.69089	8.34971	8.35346	6.93959	7.48221	8.3583	6.40833	6.59748
CHIP	-2.55121	-3.68567	0.00360572	0.344957	2.89616	1.11054	1.38387	6	7	10.9711	1.81375	2.41854	3.68874	3.96359	0.471044	4.26197	3.65552		-0.791797	1.59488	-0.628324	1.72188	0.495959	-0.322864
DHX9	-1.97989	-3.68519	0.00362615	2.47961	4.45949	1.15103	0.834039	7	7	10.939	3.22855	5.0333	4.16816	5.91152	4.11323	4.42395	4.33773	1.53668	3.35888	1.37107	3.14712	0.912057	3.45118	3.58025
PLBL2	-1.67423	-3.68154	0.0165026	0.486257	2.16048	0.185542	0.973643	2	5	4.60736		3.41165	1.11084	2.95387		1.64924	1.67683		0.617454		0.355059
S39AE	-1.82498	-3.63854	0.00541328	3.25422	5.0792	0.580579	1.08219	4	7	8.99989	3.93452	4.31766	5.62573	5.63807	3.70409	6.53269	5.80164		3.04139	3.56347	2.54812			3.86389
MTDC	-2.68593	-3.63797	0.0117872	1.13402	3.81995	0.344447	1.74163	3	6	5.72529	1.54484	4.00617	2.58902	6.18795		5.38673	3.20499	1.32268		0.736454				1.34292
SMU1	-2.59634	-3.62615	0.00947423	0.79372	3.39006	1.62947	0.648682	6	6	6.54595		2.92724	3.07729	4.20952	2.53	3.64388	3.95244		4.01603	-0.280009	0.917326	0.0845902	0.0143594	0.0100225
4F2	-2.16306	-3.62442	0.00708446	4.41294	6.576	1.47202	0.571289	7	7	7.76736	6.41882	6.64815	7.26789	6.50233	5.4573	6.97189	6.76562	7.29087	3.74799	4.99311	4.86413	3.55385	3.49736	2.9433
LPPRC	-1.84854	-3.62276	0.00569998	3.59005	5.43858	1.20599	0.60672	7	7	8.85432	4.86544	5.71358	5.30087	5.91415	4.41205	6.02878	5.8352	1.94252	3.71148	3.75075	4.8583	1.95321	4.15656	4.7575
CPT1A	-2.04097	-3.61759	0.0035379	2.35316	4.39413	1.07523	1.03536	7	7	11.9829	5.09731	4.71872	4.38467	2.23922	5.27094	4.08483	4.96322	3.4731	3.52671	1.7221	3.37699	1.31469	1.989	1.06952
RAGP1	-2.25305	-3.6171	0.00490455	-0.0283769	2.22467	0.791007	1.35645	5	7	9.75604	2.32618	1.86748	1.27918	3.60691	-0.0799821	3.80176	2.77118		-0.693869	1.17883	-0.788502		0.05967	0.101985
SC65	-2.13739	-3.59912	0.0454421	2.17173	4.30912	0.647166	1.00142	2	7	2.63103	5.12543	3.97426	5.09884	5.2986	2.42237	4.06688	4.17745				2.62934			1.71411
HMOX2	-2.6327	-3.59008	0.00379969	2.82652	5.45922	1.45438	1.2842	7	7	11.8188	4.79977	4.50971	6.6136	4.48561	4.02149	6.66394	7.12045	1.3446	2.63587	3.33731	4.95746	1.38779	1.7428	4.37981
THOC4	-1.57641	-3.58949	0.00537742	4.39626	5.97267	0.704957	0.808925	5	7	9.47491	4.32347	6.5647	6.32481	6.14374	5.52369	6.36953	6.55873	4.09211	5.62885	4.22802	3.84468	4.18763
NICA	-1.63057	-3.58594	0.00394598	1.17619	2.80676	0.927583	0.766114	7	7	11.5863	2.82233	1.84361	2.90704	1.89428	2.73819	3.91447	3.52738	1.93579	0.200237	1.43978	2.6321	0.383441	1.35158	0.290401
YES	-1.44606	-3.58588	0.0109338	1.39147	2.83753	0.295534	0.912504	2	7	6.20019	1.93923	1.97114	3.27939	2.56737	2.15086	4.20127	3.75343		1.1825		1.60044
RS23	-0.692562	-3.57245	0.00746799	6.90263	7.59519	0.416325	0.246706	6	7	7.86879	7.61531	7.88045	7.53929	7.5986	7.90979	7.41209	7.21079		7.35076	6.58127	6.85591	7.48526	6.54561	6.59695
TWF1	-1.62627	-3.56966	0.00836715	0.201686	1.82795	0.605202	0.81945	5	5	7.36305		1.16784	1.27359	3.09975		1.39691	2.20167	0.794296	0.00691634	0.393596	-0.750922			0.564543
CELF1	-1.96057	-3.56927	0.0165887	0.363729	2.3243	0.294974	1.13626	2	5	4.90452		1.54296		0.758429	3.51721	2.82195	2.98094	0.155151					0.572307
PTBP1	-1.92915	-3.56715	0.00576276	3.0628	4.99195	0.885793	0.974085	5	7	9.27914	3.61601	4.89019	5.38847	5.35144	3.75577	5.80028	6.14151		4.56088	2.62088	3.09472	2.28853		2.749
TPD54	-1.63687	-3.56694	0.00582218	3.24947	4.88634	0.755676	0.821377	5	7	9.22161	4.7797	4.53971	5.20785	4.44812	6.49444	4.86536	3.86918		2.89294	3.57388	4.40748	2.88278		2.49026
NCBP1	-1.73718	-3.56079	0.00419476	0.239568	1.97675	0.808174	1.00645	7	7	11.4653	0.933175	2.85099	0.721731	2.95419	1.09519	2.51019	2.77179	-0.283738	1.3703	-0.545839	1.06336	-0.200451	-0.51761	0.790953
ATPO	-0.682446	-3.56041	0.00695139	7.57206	8.2545	0.462879	0.207173	7	7	8.31114	7.93281	8.28568	8.45384	8.03518	8.21137	8.41083	8.45181	7.60015	7.88361	7.72217	7.72087	6.53986	7.76114	7.77659
NCEH1	-1.77735	-3.55796	0.0043272	2.64144	4.41879	1.04679	0.806854	7	7	11.2694	3.45851	3.97272	5.68457	4.50916	3.60368	4.59084	5.11204	2.91473	0.807737	1.84555	4.06223	2.61372	3.22493	3.02119
ALG11	-1.46566	-3.5528	0.0135665	-0.234917	1.23074	0.218108	0.981852	5	6	5.5852		0.0374114	2.27641	0.711466	0.39877	2.30999	1.6504	-0.0341521	-0.524205	-0.217652	-0.377407	-0.0211693
S23IP	-2.26652	-3.55062	0.0109638	1.59259	3.8591	1.25344	0.807966	5	7	6.35355	4.87465	3.42436	3.54634	2.7902	5.03602	3.6582	3.68396	-0.0568654	2.63964	1.01025	3.02952			1.34039
AIFM1	-1.19966	-3.53778	0.00416244	4.44165	5.64132	0.668866	0.597951	7	7	11.8524	5.32789	5.43686	5.87415	4.50996	6.07414	6.13344	6.13277	3.93946	5.26397	4.63641	5.18357	3.38438	4.21985	4.46393
RL5	-1.02833	-3.52391	0.00666999	6.78083	7.80916	0.690337	0.345729	7	7	8.83162	7.69039	8.00177	8.05718	8.18604	7.1656	7.93442	7.62872	6.6926	8.05583	6.75864	6.76867	5.90035	6.19037	7.09934
SYDC	-1.95448	-3.52364	0.00758255	2.32324	4.27773	1.34816	0.579768	7	7	8.14585	4.08985	4.62935	3.43289	5.25432	4.15776	4.47329	3.90662	0.405501	3.01128	4.23339	2.06282	3.50885	1.10634	1.93451
ASNA	-1.42741	-3.51852	0.00711525	0.715718	2.14313	0.456013	0.971658	7	7	8.52078	0.982718	2.74728	1.97493	3.4345	0.757875	2.51077	2.59385	0.800429	1.57003	0.254783	0.549274	0.217605	0.858899	0.759001
PSMD3	-1.3531	-3.51828	0.00505303	2.25388	3.60698	0.568235	0.811586	6	7	10.6467	3.07483	4.12949	3.03844	4.96542	4.14358	3.13858	2.75851	2.39305	3.1854	1.44525	2.34621		2.04388	2.10947
PPIG	-1.4684	-3.51575	0.00498455	1.69822	3.16662	0.742222	0.760526	6	7	10.776	2.4011	2.36324	3.40341	2.69038	4.52837	3.42154	3.35831	0.773303	1.27355		2.136	1.24903	2.82541	1.93201
RAE1L	-2.12624	-3.5111	0.0229973	3.13665	5.26289	1.11026	0.640209	4	7	4.17299	5.06712	5.94138	4.72025	5.67017	4.21288	5.88881	5.33962		4.75965	2.68726	2.8442			2.2555
ADT3	-0.666257	-3.50991	0.00581684	6.97382	7.64008	0.245818	0.426297	6	7	9.79009	7.14923	7.46079	7.96804	7.20195	7.5011	7.90492	8.29455	7.00819		6.99818	7.35329	6.5798	6.94359	6.95989
EFTS	-2.07501	-3.50294	0.0060553	1.40365	3.47866	0.726585	1.3104	5	7	9.60691	4.30335	1.25004	3.19456	3.93584	2.42563	5.19045	4.05075	1.23701		0.565226	2.42464	0.98432	1.80705
RS13	-1.10426	-3.49292	0.0106659	6.76532	7.86958	0.811002	0.204697	7	7	6.76138	7.82416	7.63935	7.99225	8.14255	7.78919	8.07287	7.62671	7.03332	7.85917	6.46193	6.79067	5.23083	7.24475	6.73657
IMP3	-2.81475	-3.49107	0.0847974	0.61482	3.42957	0.9762	0.93163	2	5	1.80156		2.4929	4.78777	2.86917		3.96051	3.03747		1.3051		-0.0754579
OAT	-1.65614	-3.48584	0.00454538	4.7006	6.35675	0.926444	0.849578	7	7	11.9111	5.48667	6.56342	6.60096	7.45354	4.9457	6.78798	6.65895	4.82842	4.12998	3.22225	6.19573	4.86209	5.23651	4.42925
PRDBP	-1.21209	-3.4785	0.00522285	4.68169	5.89379	0.60318	0.65228	6	7	10.9114	5.86206	6.4511	6.8545	5.89233	6.01825	5.15163	5.02664	4.70843	5.24023	4.65209		4.22007	5.43719	3.83216
XXLT1	-2.59137	-3.47471	0.0178245	0.669772	3.26114	0.493621	1.4737	2	5	4.98869		3.67933	4.84825	1.05046		2.62724	4.10044		1.01882		0.32073
RM01	-1.5311	-3.47016	0.00760474	2.30197	3.83308	0.420009	1.02665	4	7	8.56066	5.87326	2.80282	3.76555	3.05141	3.32529	4.29528	3.71795		2.40646		2.32633		1.73287	2.74224
DHX15	-2.07324	-3.46183	0.00670422	2.14681	4.22004	1.19268	0.922536	6	7	9.38618	3.25547	3.73021	3.7501	5.06303	3.26112	5.19721	5.28316		1.99115	0.751352	3.05824	0.704488	3.01104	3.36459
RT05	-2.21757	-3.45337	0.00741509	1.43759	3.65516	1.08993	1.10604	5	7	8.85474	3.56782	3.4567	3.23438	2.27202	2.92225	5.65045	4.4825		2.37982		0.0210659	2.67957	0.95306	1.15442
NUP85	-1.55312	-3.45069	0.0127173	1.4298	2.98293	1.03856	0.399626	6	7	6.26554	2.39721	3.42758	2.83157	3.31642	2.54771	3.08995	3.27004	0.0940502	2.27295	1.72256	2.81144		0.518794	1.15903
ITPR3	-2.62455	-3.44962	0.00713177	0.0223521	2.6469	1.7786	0.942619	7	7	9.12406	1.76687	1.82019	4.07111	2.42812	1.88199	3.73295	2.82708	2.68611	-2.15449	-1.14202	1.98977	-0.590586	-1.127	0.49468
SLIRP	-1.11413	-3.44602	0.0154906	5.89897	7.0131	0.661936	0.343908	5	7	5.55353	7.02687	7.22927	6.42903	7.36409	6.68898	7.31776	7.0357		5.7778		6.25875	4.88881	6.66582	5.9037
RM44	-1.86117	-3.4447	0.00753437	2.14873	4.0099	0.561523	1.22134	4	7	8.84056	4.63989	2.0548	3.71557	3.30272	3.56366	5.62051	5.17214		2.62788		2.15763		1.35828	2.45113
COPB2	-0.86007	-3.43035	0.0119458	5.47348	6.33355	0.646557	0.148328	7	7	6.62982	6.28995	6.1571	6.35454	6.42599	6.14072	6.42018	6.54639	4.37566	6.25372	5.53861	5.66002	4.84418	5.72751	5.91467
MFN2	-2.10549	-3.42793	0.00599888	0.111028	2.21652	0.909789	1.34652	7	7	10.5334	2.8118	2.88548	3.57982	-0.130998	0.894027	3.19328	2.28221	-0.531749	1.25912	1.16951	0.777877	-0.635653	-0.706257	-0.555652
ATRX	-1.52507	-3.41482	0.00946405	-0.501285	1.02379	0.641524	0.822173	4	7	7.82677	1.20767	0.829432	-0.0171726	0.452784	0.675082	1.50422	2.51448		-0.53761	-1.3136	0.24967		-0.403596
TMX1	-1.14168	-3.41277	0.00771079	6.36006	7.50174	0.785901	0.407119	7	7	9.00392	7.40698	7.91237	7.93332	6.74349	7.32452	7.53832	7.6532	5.38449	5.77029	7.51654	7.26314	6.14118	6.51174	5.93302
SRPRB	-1.19869	-3.38881	0.00784954	5.6401	6.83879	0.82667	0.438683	7	7	9.13096	6.76993	6.91877	7.26642	5.9183	7.0126	6.85907	7.12643	5.67909	4.60107	4.59656	6.85576	5.53081	6.13383	6.08359
RL18	-1.11057	-3.38489	0.00613162	6.41384	7.52442	0.70268	0.509681	7	7	10.9447	7.96378	7.35464	7.89616	6.66488	7.63298	8.04934	7.10914	5.97698	7.86612	5.94557	5.96729	6.52753	5.9842	6.62921
RBM8A	-1.66605	-3.3838	0.0152192	3.14505	4.8111	1.1558	0.372021	6	7	5.88875	4.79162	4.83537	4.23466	4.69196	4.67372	4.97904	5.47131		4.00964	1.54013	4.24587	1.98153	4.03036	3.06278
RS19	-0.695662	-3.38333	0.00834571	7.4083	8.10396	0.486974	0.242485	7	7	8.80305	8.14981	8.35158	8.13864	8.19396	8.33887	7.85372	7.70113	6.88288	8.04944	7.40469	6.71985	7.79031	7.72562	7.2853
SMC1A	-1.86918	-3.3703	0.0115138	1.44261	3.31179	1.40045	0.438013	7	7	7.16275	3.61557	2.39352	3.27291	3.38227	3.41025	3.75663	3.35139	-1.4221	2.84814	2.12466	1.8708	0.874971	1.58896	2.21282
RL29	-1.5609	-3.36768	0.0213345	6.7509	8.3118	0.989446	0.364942	5	7	4.78502	8.60988	8.58706	8.33596	8.36584	8.63467	7.98582	7.66336		7.57639	6.41871	5.16738	7.4019	7.1901
MDN1	-1.57462	-3.35885	0.00738423	-0.567642	1.00698	0.61539	1.0041	5	7	9.87389	-0.395148	0.639914	1.50461	1.37837	-0.151496	2.26203	1.8106	-0.763848	-1.45195	0.193769	-0.586497			-0.229681
TSP1	-1.78551	-3.35061	0.0121147	4.55583	6.34134	1.35161	0.401193	7	7	7.04913	6.79126	6.35492	5.69432	6.56132	5.94916	6.32041	6.71798	6.77334	2.98436	5.30858	3.7447	3.89175	5.57018	3.61791
HSP74	-1.65367	-3.33519	0.00625475	0.704711	2.35838	0.828547	1.01706	7	7	11.5288	2.45318	2.32965	1.46435	4.37234	1.79554	2.69119	1.40245	-0.0941169	1.17797	2.04202	-0.244356	0.0755975	1.06374	0.912117
TIM9	-0.927176	-3.33226	0.00631561	6.56423	7.4914	0.572768	0.462459	7	7	11.4898	8.01958	7.69222	7.47196	6.93914	8.09733	7.10158	7.118	5.82837	7.4542	6.14263	6.13455	6.56411	7.03407	6.79165
SYFB	-2.18025	-3.32749	0.00895391	-0.185929	1.99432	0.786337	1.54496	7	7	8.9131	0.196279	3.85863	3.94161	2.58564	0.423143	1.96144	0.993536	-0.850924	-1.0479	1.07475	-0.684293	-0.492869	0.253132	0.446601
CTNB1	-1.13088	-3.32368	0.00682119	4.12113	5.252	0.728127	0.52935	7	7	10.9575	4.74415	5.18379	5.34412	4.8955	4.70451	6.04637	5.84559	3.47124	4.87841	4.37568	4.87773	2.99194	3.7571	4.49578
B4GA1	-0.490981	-3.32303	0.0128933	1.0385	1.52949	0.1271	0.326727	4	6	6.93225	1.6811		1.17995	1.48176	2.10476	1.34183	1.38751			1.02675	1.21969		0.929857	0.977725
GEMI5	-1.82779	-3.31207	0.0123924	-0.675492	1.1523	0.546246	1.21211	5	6	7.19955	-0.333252	0.477563	0.469095	2.9573		2.12976	1.21333		-1.16155	-0.308138	0.101112		-1.04192	-0.966968
SYIC	-2.19903	-3.30499	0.00810569	1.34166	3.54069	1.28801	1.07867	6	7	9.85164	1.67252	3.82733	3.09411	4.68313	3.05006	4.82738	3.63029	0.330386	3.69916	0.547229	1.08948		0.493725	1.88997
NXF1	-1.11806	-3.29408	0.0140284	1.50631	2.62437	0.494093	0.520435	4	5	6.71897		2.41774	1.84677	3.19416		2.94454	2.71864	1.93585	1.79464		1.46913		0.825604
LA	-2.14212	-3.29015	0.00697441	-0.188311	1.95381	1.05339	1.36295	7	7	11.283	0.507518	1.37859	1.16825	4.79076	2.13453	1.80996	1.88709	0.355112	-1.13456	-1.73687	-0.527601	-0.293122	1.20148	0.817388
DEK	-1.06648	-3.28789	0.0112544	2.00634	3.07283	0.367081	0.655105	4	6	7.89871	3.47454	2.99828	1.7849	3.38694		3.4748	3.31753		1.90897	2.51119	1.97125	1.63397
BASP1	-2.06628	-3.28718	0.00897779	1.23632	3.3026	1.02465	1.13842	5	7	9.32859	3.12149	2.33386	3.46909	2.9151	5.65464	2.2582	3.36582			0.805751	-0.00610413	1.54139	1.07119	2.76937
AAAT	-2.29733	-3.28196	0.0171178	3.90692	6.20424	1.12008	0.938981	4	5	5.9185		4.57348	6.32224	6.73463		6.90707	6.48379	5.46204		3.87062	2.8388	3.45621
LRC59	-1.47714	-3.28184	0.00659165	5.21943	6.69658	0.868909	0.814314	7	7	11.9498	5.81114	6.59695	7.55236	6.27047	5.67965	7.46594	7.49952	5.83376	6.06176	5.18587	6.0827	4.94498	4.76005	3.66689
DNMT1	-1.12449	-3.2803	0.0266668	0.515306	1.6398	0.146909	0.748723	4	5	4.38073		1.03794	1.30056	2.2673		2.60965	0.983537		0.690377		0.330773		0.520391	0.519682
ROA3	-0.888459	-3.27044	0.00674644	6.13577	7.02423	0.527473	0.488242	7	7	11.929	6.60652	6.59996	6.9104	7.18091	6.79758	7.05714	8.01712	5.46141	7.1153	5.76936	6.44742	6.09056	6.01511	6.05125
PLST	-2.33503	-3.26878	0.00672527	1.77608	4.11111	1.35558	1.31697	7	7	11.99	2.23417	5.26539	5.13058	5.86082	3.34198	3.61906	3.32579	2.85248	0.527226	4.00772	1.89569	2.05913	0.227061	0.863253
MAP1S	-1.00504	-3.26165	0.024973	-0.118046	0.886992	0.416075	0.472713	3	6	4.64133		0.966564	0.4999	1.38712	0.934779	0.18378	1.34981		0.360532		-0.393953	-0.320715
TOM20	-1.59852	-3.25973	0.0645513	6.28626	7.88478	0.810951	0.385802	3	7	2.39928	8.24372	7.94678	8.04777	7.29572	8.36414	7.79692	7.49837		7.01122				6.43705	5.41049
NOL10	-1.60691	-3.24796	0.0206236	0.975824	2.58274	0.604365	0.784284	3	5	5.35167		1.28069	2.72927	2.67585		3.40599	2.82189				0.278774		1.29524	1.35346
PRKDC	-1.87098	-3.24755	0.00706958	-0.955825	0.915151	1.02337	1.12965	7	7	11.8847	0.570043	-0.300007	-0.0199956	2.90208	0.317736	1.10054	1.83566	-2.20227	-0.0638413	-0.967294	-0.25909	-2.43951	-0.919273	0.160498
RL22	-0.933493	-3.24521	0.00914421	7.17255	8.10604	0.562387	0.458494	6	7	9.6971	8.27862	7.83741	7.25141	8.64977	8.13308	8.46982	8.12219	7.05158	7.406	6.43332	6.63551		7.74483	7.76405
RL23A	-0.693876	-3.24456	0.0136477	7.88499	8.57887	0.539441	0.170736	7	7	7.19017	8.43565	8.81001	8.61813	8.69729	8.32567	8.68577	8.47955	7.66054	8.52547	8.12199	7.95543	8.01696	6.80883	8.10572
ILF3	-1.64869	-3.24342	0.0121662	1.64241	3.29111	1.25076	0.494302	7	7	7.82959	2.62967	3.32386	3.18529	4.18045	3.14775	2.96546	3.60527	-0.759407	1.75414	2.37769	2.93799	0.808344	1.97387	2.40427
LDAH	-1.03395	-3.23689	0.0183377	1.48485	2.5188	0.246107	0.708696	2	7	5.86486	1.9748	2.79638	3.62091	2.80199	2.23069	1.42608	2.78077			1.31083				1.65887
SYEP	-2.2036	-3.23647	0.0114269	1.45591	3.65952	1.64705	0.729581	7	7	8.2673	3.08577	4.05245	3.2464	4.99242	3.26776	4.00989	2.96193	-1.77644	3.65408	2.41221	1.33216	1.57761	1.33976	1.65201
SFPQ	-1.71648	-3.22807	0.0161157	5.63561	7.35209	1.37938	0.276612	7	7	6.48179	7.75034	7.15446	7.27431	6.92249	7.59795	7.44782	7.31727	2.80058	5.50315	5.53352	6.35701	5.7156	6.41514	7.12432
DPM1	-1.14168	-3.22409	0.0104805	4.0898	5.23148	0.59616	0.616593	5	7	8.96044	5.36762	4.66767	5.68979	4.11254	5.37739	5.79565	5.60969	4.37159	4.69902		4.45387	3.30269	3.62183
CHERP	-1.96256	-3.22262	0.0108731	0.889341	2.8519	1.44678	0.709188	7	7	8.72597	2.3224	3.24567	1.59264	3.21852	3.58638	2.62504	3.37265	-0.490654	-0.0783452	0.304267	3.3049	-0.39434	2.15828	1.42128
AP1B1	-1.50197	-3.21492	0.00789646	1.47447	2.97644	0.969951	0.766189	7	7	11.3894	3.14847	2.15712	2.86493	3.91031	1.78586	3.52735	3.44106	-0.215105	2.38559	2.41708	1.8217	1.20088	2.00665	0.704491
BRX1	-2.59865	-3.21487	0.142182	0.65171	3.25036	1.06667	0.769039	2	7	1.31425	2.7722	3.50164	3.55676	2.58627	2.1746	4.3857	3.77535				-0.102542			1.40596
SC24B	-1.49411	-3.21259	0.0156245	1.33435	2.82846	0.552929	0.880771	5	5	6.72898		2.21994	4.03561	1.80837		2.76888	3.3095		2.04321	0.611541	1.36683		1.63875	1.01144
FKB10	-1.92107	-3.2072	0.00756156	2.51785	4.43892	1.15311	1.08713	7	7	11.9586	3.35777	5.72535	4.86157	5.82484	3.47179	3.33045	4.50066	0.790613	3.13837	3.18893	2.96362	2.64285	3.85307	1.04746
NIPS1	-1.39291	-3.18755	0.00973217	2.08124	3.47415	0.735208	0.777948	6	6	9.96824	4.64227	4.07407		2.66921	2.70776	3.22257	3.52902	3.26378	1.56273	1.51757	2.42536		1.35876	2.35924
GLCE	-2.14211	-3.17149	0.0151057	-1.02096	1.12115	1.26865	0.969617	5	7	7.19883	1.5914	1.00529	1.08562	0.575486	-0.142025	0.770276	2.96198	-1.80338		-2.08367	0.826442	-1.82316		-0.221026
COR1C	-2.26695	-3.1412	0.0138197	1.89314	4.1601	1.29736	1.13551	5	7	7.9819	2.73403	4.64965	4.47953	4.99448	2.33052	4.87213	5.06033		3.09994	0.859839	0.490117	1.64649		3.36933
PPAL	-1.1414	-3.13474	0.0237425	2.2447	3.3861	0.440909	0.612206	5	4	5.31931		3.6096	2.47886			3.82175	3.6342			2.64538	2.76765	1.83596	1.839	2.13552
CCPG1	-1.67277	-3.13309	0.0334753	-0.00499961	1.66777	0.755922	0.813673	3	7	4.13917	1.55313	1.46917	2.5076	0.21722	1.24614	2.22364	2.45747			-0.806603		0.0966494		0.694955
PUR2	-2.10123	-3.12977	0.0131836	-0.807287	1.29394	0.838976	1.36373	5	6	8.40574	-1.19727	1.05504	2.19068	2.76383		1.52511	1.42628	-1.28654		0.320443	-1.67799	-0.180786	-1.21156
SYQ	-2.0402	-3.1262	0.0130144	0.659062	2.69926	1.35858	0.909913	6	7	8.53283	1.86022	1.68381	2.54247	4.36665	2.48405	3.31431	2.6433		2.10924	0.616553	-1.70405	0.159523	1.72687	1.04623
PUR6	-2.19955	-3.12457	0.00968445	1.87238	4.07193	1.50375	1.09891	7	7	10.9864	3.04621	4.40784	2.91948	5.95622	3.65206	4.95161	3.5701	1.43316	0.808492	4.83556	1.34186	2.87353	0.510317	1.30375
PEX14	-2.12576	-3.11744	0.0204291	1.17961	3.30537	0.511686	1.5292	2	7	6.04973	6.43177	1.71919	3.68493	2.32366	2.99081	2.58176	3.40543			0.81779			1.54142
RBMX	-1.47443	-3.11574	0.0158916	4.36973	5.84417	0.345727	1.18331	5	7	7.36207	7.76133	6.89255	4.78984	4.87701	5.32437	4.85114	6.41291		4.66092	3.93419	4.27043	4.77798	4.20514
CAB45	-1.85448	-3.11332	0.0172455	3.01739	4.87187	1.51835	0.422253	7	7	6.92256	4.85583	5.42545	4.36607	4.94154	5.36487	4.37134	4.77799	1.44747	5.83823	1.79283	2.12656	2.65207	3.96977	3.29479
RM04	-2.0512	-3.11307	0.016158	1.58575	3.63694	0.905438	1.21965	6	5	7.28804		2.18788	3.27846	2.93665		5.0993	4.68241	0.815917	2.44796	0.770443	2.70128	2.01267	0.766208
SC16A	-1.53569	-3.11202	0.0139077	0.65997	2.19566	0.873886	0.79715	5	7	8.2297	2.53972	1.58726	3.12655	1.09496	3.16716	1.64603	2.20796		0.214581	-0.407216	1.54317		1.58266	0.366649
IL6RB	-1.9895	-3.1076	0.0227798	0.0192456	2.00875	0.791394	1.09844	3	6	5.62209	3.11693	1.18578	1.53526	0.532101		3.25159	2.43083		-0.698808	0.867766	-0.111221
AT2A2	-1.42667	-3.10581	0.0121959	3.8793	5.30596	1.06813	0.579765	7	7	9.253	5.02094	5.22249	5.54351	4.34254	5.11429	5.74862	6.14933	3.8396	2.69802	4.21556	4.77612	2.34848	3.91945	5.35784
RM24	-1.67898	-3.09846	0.0129975	1.75354	3.43252	0.56691	1.22188	4	7	8.85793	3.82906	2.46623	2.065	3.69811	2.18611	5.1315	4.65162		2.43499		1.48303	1.13444	1.9617
DC1L1	-1.93259	-3.09035	0.0306704	0.872067	2.80465	0.55843	1.283	2	7	4.5616	3.6691	3.83611	2.8835	2.23512	4.50592	1.3389	1.16392		0.477197		1.26694
SAP	-0.906494	-3.08498	0.0102826	3.2392	4.1457	0.46458	0.623349	7	7	11.0939	5.17701	3.97881	4.42434	3.76938	3.2285	3.931	4.51083	3.03013	3.0881	4.05072	2.88648	3.71198	2.78216	3.12486
VTI1B	-1.03353	-3.07207	0.0269625	0.21832	1.25185	0.0494436	0.819612	2	6	5.10673		1.46062	1.45994	-0.252982	2.21785	1.13003	1.49563				0.253282			0.183358
RMD3	-1.5299	-3.06206	0.0110737	1.67654	3.20644	0.890126	0.907214	6	7	10.7595	2.08935	2.99923	3.96736	2.58935	2.39254	4.33863	4.06859	0.913873	1.65079	1.46822	3.26288		1.94989	0.813578
DHC24	-1.51496	-3.05851	0.0874554	1.33938	2.85434	0.577337	0.742172	2	7	2.08959	1.58381	3.38892	3.91907	2.62248	2.85441	3.13202	2.47969			0.931145				1.74762
GGH	-1.78194	-3.05338	0.0158399	1.47432	3.25627	0.472341	1.3651	3	7	7.9575	5.1646	4.00665	0.966272	3.6871	3.63041	3.2685	2.07033				2.01225		1.12738	1.28334
NH2L1	-2.28781	-3.05264	0.0178546	4.30805	6.59586	1.12981	1.30305	4	7	7.21083	8.01821	6.78371	6.75927	5.79535	8.11137	6.36855	4.33459		3.51619	5.74001	4.67612		3.29988
PAIRB	-1.49216	-3.02613	0.0116828	3.21723	4.70939	0.762301	1.01194	6	7	10.8616	3.78325	6.08679	4.04472	5.92408	5.21078	4.17194	3.74418		4.35257	2.53722	2.34964	3.01187	3.23577	3.8163
CPNE3	-0.894203	-3.00867	0.011471	5.20787	6.10207	0.616726	0.487831	7	7	11.3958	5.4022	6.49356	6.35672	6.51118	5.46469	6.47391	6.01226	5.66079	6.08294	4.57258	5.43369	4.30833	5.04463	5.35215
RT18B	-1.64088	-3.00718	0.0335583	1.8073	3.44818	0.48739	1.11926	2	7	4.55883	4.83035	3.18004	1.68204	2.3726	3.61869	4.13554	4.31798		2.15193		1.46266
SC23B	-1.36584	-3.00718	0.0212419	0.347119	1.71296	0.497041	0.862353	3	6	6.58453	0.0227392	2.20726	2.02741	2.15377		2.27004	1.59654	0.345865	-0.149295					0.844786
FADS3	-1.79523	-3.0071	0.0295723	1.85933	3.65456	0.0520577	1.45956	2	6	5.03787	2.00859	3.08697	3.71233	2.71075		4.224	6.18473			1.89614	1.82252
ECSIT	-1.73525	-3.0051	0.0297478	1.33399	3.06924	0.73576	0.8746	3	5	5.02343		2.23806	3.48111	2.05658		4.05766	3.51279		1.28092		0.626197			2.09484
DNJA3	-1.92866	-2.99679	0.0196632	2.24878	4.17744	0.671307	1.42635	6	6	7.11148	3.27677	1.89021	3.92994	5.15063		5.6208	5.19632		1.56973	2.13157	2.1642	3.27173	1.57993	2.77555
MBOA7	-2.10804	-2.99577	0.014971	4.16742	6.27547	1.4274	1.04357	6	7	9.0483	6.89247	6.23887	6.82954	3.97393	6.68314	6.43876	6.87154	3.45204	3.02172	6.09977	5.89373	3.39742	3.13985
SPCS1	-1.18591	-2.9901	0.0306721	6.39109	7.57701	0.837986	0.343522	5	7	4.97017	7.01713	7.64479	7.93055	7.26324	7.47368	7.82766	7.88203	6.29188	5.10774	6.39233	7.39639		6.76713
NCPR	-1.81289	-2.98579	0.019744	1.95323	3.76612	1.53199	0.483323	7	7	7.18267	3.70103	3.44296	3.14437	3.35977	4.02631	4.29322	4.39518	1.00459	2.77352	-0.255402	4.16545	0.902736	1.85418	3.22756
GUAA	-0.982894	-2.982	0.0518003	0.640058	1.62295	0.494768	0.328898	3	4	3.30347			1.46248	2.09984		1.5679	1.36158		1.20038	0.263333	0.456461
PELP1	-1.52938	-2.97816	0.0182728	1.03244	2.56181	0.370542	1.23516	3	7	7.75817	0.348427	2.80898	3.28615	2.99903	1.3679	3.39509	3.72712		1.40453		1.02932			0.663463
NDUF3	-1.59036	-2.97743	0.0218959	3.63384	5.22419	0.617689	1.05207	3	7	6.64225	5.22973	4.9093	5.3177	3.17473	5.37214	6.09658	6.46917				2.93782		3.84688	4.1168
FLNC	-1.60996	-2.97558	0.0121995	1.56609	3.17605	1.12426	0.886134	7	7	11.379	2.52528	3.10597	3.68399	4.56375	1.91424	3.72122	2.71787	-0.348466	2.29578	2.31997	1.89042	0.56749	2.86179	1.37562
LCAP	-1.3647	-2.96739	0.0130926	1.87312	3.23782	0.819394	0.835009	6	7	10.759	3.5751	3.35391	4.51632	1.90508	2.48124	3.48427	3.34879	1.65574		2.12216	2.90978	0.56782	1.52193	2.46128
SC23A	-2.12537	-2.9668	0.0212127	1.55292	3.67829	1.82687	0.504977	7	7	6.91155	3.22265	3.46433	3.83934	4.55688	3.02896	3.91314	3.72271	-1.39719	4.36742	0.120278	2.53673	1.72613	2.1227	1.39434
CRTAP	-1.52938	-2.96188	0.0174534	3.43921	4.96859	0.710928	0.990893	4	7	8.26501	5.27589	5.42206	4.41647	6.03837	2.994	5.30021	5.33316		3.24127	2.97289	3.05059		4.49211
RL14	-1.15812	-2.95932	0.0174138	6.60085	7.75898	0.945027	0.423072	7	7	8.31216	8.44491	7.64696	7.11519	8.07843	7.57528	7.86469	7.58739	7.46442	7.71351	7.13922	6.55125	6.61781	5.39269	5.32709
YMEL1	-2.00398	-2.94729	0.0211905	0.728376	2.73236	0.445572	1.71997	5	7	7.0866	4.25594	2.39617	4.04788	-0.636849	1.87683	3.49597	3.69059		0.142987	0.467295	0.736338		1.02176	1.27349
CLIC1	-1.48767	-2.94385	0.0123364	4.2508	5.73847	0.913022	0.976747	7	7	11.9458	4.50408	6.4114	6.37817	7.12612	4.57204	5.52771	5.64976	2.64444	4.40663	5.61972	4.0922	4.2415	4.85859	3.8925
GLSK	-1.21835	-2.93955	0.0127911	3.95136	5.1697	0.699245	0.844712	7	7	11.5955	4.15305	5.83758	5.19567	6.1678	3.92912	5.68242	5.22229	3.43794	4.72977	3.84043	4.95294	2.94003	3.96715	3.79125
SEC62	-1.8454	-2.93429	0.0223682	3.62045	5.46585	0.273149	1.58353	2	7	6.86785	7.11728	5.02885	6.0236	3.04699	7.6328	4.46707	4.94438		3.81359	3.4273
RL7L	-1.84829	-2.93412	0.0399634	2.12891	3.97721	0.886505	0.971575	3	7	4.21661	2.29739	4.29408	4.24639	3.62984	3.35802	5.15325	4.86148	3.07836			1.32282		1.98555
AP2A1	-1.12418	-2.93397	0.0241404	3.05326	4.17744	0.99612	0.188201	7	7	6.42781	4.29387	4.1809	3.78992	4.18923	4.1297	4.3173	4.34114	1.33428	4.76667	2.87083	3.16596	3.07295	3.16758	2.99455
IF4E	-1.33165	-2.92977	0.015575	4.1949	5.52655	0.71234	0.857755	5	7	9.66478	5.87902	6.93943	4.60078	4.4191	5.89976	5.65509	5.29268		3.71927	5.29835	3.43576	4.28248		4.23864
SRC8	-1.6298	-2.92941	0.0177002	-0.170944	1.45886	1.15713	0.777579	6	7	8.55199	1.96411	2.17552	0.976765	2.25036	0.117865	1.06068	1.66671	-2.01493	0.141358	-0.824382	1.27867		0.64295	-0.249334
TRXR1	-2.29563	-2.92883	0.0183098	0.0891016	2.38473	0.738757	1.88053	5	7	8.29216	-0.213461	1.25175	3.16565	5.51363	0.993706	3.23002	2.75182	0.190123		0.738601	-0.887079		-0.419601	0.823462
REEP5	-0.887067	-2.92542	0.0215242	6.60561	7.49267	0.671459	0.342968	6	7	7.1868	7.86608	7.56444	7.36455	6.88766	7.89451	7.36238	7.5091		6.09515	6.23982	7.22985	6.96501	5.73481	7.369
TFAM	-1.63634	-2.9237	0.0134607	3.75866	5.395	0.910768	1.16756	7	7	11.3288	6.61012	5.27116	3.68729	4.43481	7.04038	5.09652	5.6247	2.76861	5.14796	3.04261	2.84762	4.54438	3.91329	4.04612
CD151	-2.13785	-2.92023	0.0142498	3.46165	5.59949	1.58641	1.11126	7	7	10.7456	6.43302	6.83478	5.67457	4.89684	6.5525	3.726	5.07873	2.23963	4.9423	5.43129	4.36817	3.47293	0.949421	2.82778
CO4A2	-2.51173	-2.91849	0.0139792	-0.608318	1.90342	1.43453	1.66851	6	7	10.9968	4.93963	1.26949	1.69451	-0.594153	1.74276	1.55799	2.71368	2.11443	-1.05896		-0.874768	-2.02526	-0.443963	-1.36139
RL10A	-1.0677	-2.91246	0.0232578	6.45162	7.51932	0.938346	0.245469	7	7	6.81737	7.52674	8.01975	7.53787	7.44759	7.31097	7.52224	7.27005	5.51294	7.79894	5.83394	6.30123	7.27048	7.06046	5.38334
RRS1	-1.91493	-2.90953	0.0266077	3.24512	5.16005	0.800934	1.2391	3	7	6.07625	4.44524	5.59013	6.17529	5.46277	2.72954	5.35355	6.36383				2.32033		3.69917	3.71586
EIF3G	-1.93387	-2.90624	0.0152381	0.0421873	1.97606	1.24747	1.13311	6	7	10.2857	1.08909	3.27282	1.49058	3.79599	1.26992	0.886928	2.02709	-1.13239	0.703359	1.48529	1.2799		-1.0623	-1.02073
NU188	-0.598661	-2.90552	0.0260738	1.09741	1.69607	0.126178	0.472101	3	6	6.21365	1.49608	1.78428		0.949229	1.69203	2.38888	1.86591				1.21452		0.963786	1.11391
ATD3A	-1.41227	-2.89949	0.0176971	0.600921	2.01319	0.534051	1.07777	4	7	8.95667	1.13668	2.65546	2.93216	1.66352	0.11602	2.83042	2.75809		1.08748	-0.0818858	0.440773	0.957315
SREC	-1.48423	-2.89653	0.0544556	0.407897	1.89213	0.77248	0.667566	3	7	3.37006	2.3269	1.58521	3.11753	1.57903	2.00358	1.55662	1.07603		0.466861	-0.392375	1.14921
RBMS2	-1.21697	-2.89467	0.0566008	2.29207	3.50904	0.639386	0.532306	3	7	3.26851	3.73681	4.282	3.70787	2.8692	3.48526	2.76271	3.7194		2.58248		1.55902	2.73471
WDR18	-2.11051	-2.89258	0.0300586	2.30502	4.41552	1.49256	0.779539	5	7	5.56964	4.78782	4.4381	4.18139	3.47102	5.9268	4.12753	3.97601		4.77271	1.41888	2.67201		1.29141	1.37008
TRIP6	-0.823406	-2.88176	0.0300441	0.962201	1.78561	0.108614	0.674136	2	6	5.63811	1.42689	1.15131	1.24447	2.76101		2.47786	1.6521		1.039		0.885399
MTX1	-2.35834	-2.87973	0.0145917	2.24535	4.60369	1.3306	1.71003	7	7	11.3166	5.99134	2.38234	5.55405	2.03093	6.29478	4.91333	5.05902	2.44318	2.78216	3.00666	4.21869	2.18518	0.601085	0.480486
ABCE1	-1.48337	-2.87971	0.0340863	0.15282	1.63619	0.436582	1.09099	2	7	5.06464	-0.456766	1.76551	2.00227	2.88095	1.1811	1.52658	2.55369	0.461531						-0.15589
RUXF	-0.817083	-2.86758	0.0345501	6.62091	7.43799	0.598802	0.257565	5	7	5.06808	7.41329	7.29746	7.60184	7.04954	7.88336	7.41456	7.40589		7.30951	6.25733	6.04443		6.265	7.22828
MTCH2	-1.77076	-2.86727	0.0178145	3.39385	5.1646	0.723095	1.39204	5	7	9.38124	4.63655	5.74138	6.73133	2.34895	5.39239	5.41846	5.88316	3.97421		2.56601	4.29976		2.93838	3.19087
AHNK2	-1.92533	-2.85043	0.0196075	-0.748753	1.17658	1.39104	0.967567	6	7	8.75255	0.357831	0.279455	2.14366	1.85202	0.0653874	2.40688	1.13084	-0.575056	-0.661339	-2.77975	1.41022		-1.56592	-0.32068
AP3B1	-1.33579	-2.84905	0.0188492	1.09821	2.434	0.77826	0.831145	5	7	9.13167	1.82778	2.61037	2.85509	3.8687	1.27805	2.56152	2.03647		1.23265	2.16385	0.573758		0.141604	1.37919
HSP13	-1.46691	-2.84286	0.0228263	0.347436	1.81435	0.593576	1.11588	6	6	7.61979	-0.276921	1.77813	1.85666	2.01043		2.87443	2.64334	0.483912		0.674568	-0.170511	1.31959	-0.138676	-0.0842642
NUCL	-1.15504	-2.83844	0.0272321	6.39439	7.54943	1.0555	0.21223	7	7	6.48436	7.39527	7.77264	7.25846	7.71701	7.80056	7.42382	7.47824	4.54645	6.24124	5.93127	6.80649	6.09677	7.48952	7.64898
COTL1	-1.41812	-2.83457	0.0342448	0.997043	2.41516	0.122502	1.20696	2	6	5.28857	3.83327		1.32373	2.36344	3.96081	1.63241	1.37732			1.08367				0.910421
IF6	-1.87465	-2.83233	0.0228599	3.41176	5.2864	0.585689	1.63289	6	7	7.72741	2.94782	5.63137	6.1914	6.41946	2.92048	6.36087	6.53344	2.49355	3.72955	4.10531	3.31294		3.78894	3.04027
LDHA	-0.948583	-2.83173	0.0174592	5.65482	6.6034	0.746421	0.477863	7	7	10.211	5.8255	6.83254	6.79344	7.36519	6.33598	6.448	6.62315	6.18007	4.15024	6.28298	5.61954	6.17579	5.33561	5.83948
LACTB	-1.82275	-2.83036	0.0164047	1.40448	3.22722	1.09479	1.22671	6	7	10.9675	3.01313	1.20275	2.91755	2.42348	4.1082	4.06672	4.85872	0.50655	1.29908	0.409328	0.716222		2.52181	2.97386
NCLN	-2.51287	-2.82683	0.0157332	2.38772	4.90058	1.81347	1.49759	7	7	11.5858	6.98529	4.79538	6.41377	2.3969	4.30591	4.46884	4.93799	0.433946	-0.41779	2.62165	4.70578	2.35622	3.27399	3.74023
ARFG1	-1.57625	-2.82593	0.0695358	1.56874	3.14499	0.878446	0.614226	3	7	2.88373	3.45265	3.11295	4.20224	3.09913	2.14606	2.93494	3.06694		1.07161	1.05158	2.58301
S61A1	-1.35928	-2.82377	0.0165885	5.57534	6.93462	0.815313	0.920056	6	7	10.9754	7.48624	7.30267	6.98895	4.94902	7.74949	6.96105	7.10494	6.26141	4.56486	6.80949	5.35857		5.12471	5.33301
RETST	-1.69093	-2.82213	0.0229927	-0.467218	1.22371	0.501189	1.47015	5	7	7.80153	0.73171	-1.3292	2.1185	0.946513	0.55833	2.53982	3.00029	-0.566086	-0.945043		0.386145		-0.614706	-0.5964
PROF1	-0.544119	-2.8199	0.019052	7.3186	7.86272	0.444058	0.251873	7	7	9.49857	7.75372	8.04838	7.93102	8.31516	7.61801	7.72415	7.64862	7.44926	7.11009	7.4873	7.49396	6.41685	7.79169	7.48107
FKBP4	-1.87538	-2.81778	0.0165701	0.150034	2.02542	1.05608	1.40905	7	7	11.124	0.625979	2.57967	0.301594	4.45889	1.52546	2.73157	1.95476	0.0288916	-0.86737	1.94254	-0.973359	1.14889	-0.235175	0.00581608
TPR	-1.25738	-2.81552	0.0219369	2.73399	3.99137	1.08051	0.478121	7	7	8.26288	4.28581	3.36981	3.58963	3.54911	4.41299	4.56975	4.16249	0.783379	2.11883	2.62881	4.11848	2.72519	3.21603	3.54722
BAZ1B	-1.45654	-2.81331	0.0249377	0.56031	2.01685	0.400534	1.29968	6	7	7.29582	1.36954	2.84599	2.28356	3.04981	-0.571512	3.10793	2.03262		1.02465	0.208938	1.02268	0.073551	0.580915	0.45113
ARMC1	-1.63306	-2.81017	0.0206008	1.91238	3.54544	0.617242	1.30277	4	7	8.8947	1.58503	3.69907	2.06597	3.33629	4.6909	4.79369	4.6471	1.62466		2.11291	2.66877			1.24317
CD99	-0.822762	-2.8091	0.0157844	6.29275	7.11551	0.554874	0.540939	7	7	11.9922	7.60063	7.33513	7.29484	6.1959	7.7235	6.65497	7.00361	5.46395	7.05184	6.45405	5.76659	6.73337	6.08097	6.49847
RALB	-0.896016	-2.80902	0.0183822	4.80591	5.70193	0.715413	0.447679	7	7	10.0742	5.97157	6.10527	5.51834	4.90743	6.08338	5.38648	5.94102	3.9547	4.69181	5.30763	5.70583	4.40942	5.53223	4.03976
MMP1	-3.12002	-2.79884	0.0336353	-0.783639	2.33638	1.41067	2.01382	3	7	5.59626	3.27414	1.64001	-1.56648	3.98357	4.45993	2.78545	1.77807	0.76796		-1.13003	-1.98884
RT07	-1.30497	-2.79421	0.0234355	2.53393	3.8389	0.391668	1.08114	3	7	7.98968	4.0905	3.80912	4.02594	2.80396	2.21182	5.53868	4.39227			2.20156	2.4345		2.96573
P3H1	-1.02324	-2.79075	0.0209467	3.73164	4.75488	0.744181	0.543091	6	7	9.0375	5.22578	4.69601	4.48573	5.72997	4.59624	4.14118	4.40927		4.21727	3.23392	2.80061	4.05698	4.78952	3.29153
NU107	-1.68457	-2.79022	0.0436887	1.13719	2.82177	1.31351	0.368932	5	7	4.45408	3.01321	2.11269	2.66933	3.01267	3.16884	3.09801	2.67762		1.78129	0.405153	2.52964		1.74205	-0.772172
VMP1	-1.37668	-2.78487	0.0253981	1.4614	2.83807	0.405701	1.23231	6	7	7.47	3.74152	1.45585	1.91003	1.8112	2.39748	4.00671	4.54372	1.56313	1.24688	1.85466	0.750499	1.59312		1.76008
RAB5A	-1.56216	-2.76854	0.0230685	3.04693	4.60909	1.17821	0.780482	6	7	8.47007	4.37761	4.20545	5.46937	4.90184	3.17834	4.79267	5.33838	2.65352	3.4579	2.1986	5.24566	2.11047	2.61543
IMA5	-1.64709	-2.76763	0.0410979	2.07898	3.72608	0.799719	0.993453	3	7	4.81784	4.28027	2.0762	3.37509	4.74327	2.82338	4.51944	4.26489				1.25115	2.84726		2.13855
ADT2	-0.825963	-2.7633	0.0176141	7.00465	7.83061	0.506958	0.606959	7	7	11.631	7.45764	7.66232	8.40063	7.65693	6.82197	8.3567	8.45811	6.92786	6.08143	7.37451	7.71512	6.8805	7.14029	6.91285
RL28	-1.17571	-2.75999	0.0263491	6.7466	7.92231	1.06277	0.375152	7	7	7.4724	7.75558	8.18091	8.10309	8.01226	8.46478	7.5203	7.41922	6.86854	7.86862	7.50072	6.25537	7.86425	5.43277	5.43595
AHSA1	-1.90534	-2.7538	0.0350472	-0.199934	1.70541	0.86959	1.2596	3	7	5.68243	2.35384	1.56617	-0.128314	3.41242	0.348097	2.68569	1.69995		-0.563759	0.792477	-0.828522
RL11	-0.860165	-2.74935	0.0287944	6.18098	7.04115	0.797098	0.223185	7	7	6.93503	6.82721	7.31976	7.19697	7.28421	6.78026	6.98177	6.89785	5.54936	6.95987	5.73877	6.306	4.94505	6.68434	7.08348
STML2	-1.18377	-2.74137	0.0182369	5.48735	6.67112	0.869135	0.741524	7	7	11.7096	5.54324	5.74612	6.88165	6.68175	7.22989	7.35526	7.25993	5.80477	6.72351	5.33088	6.44097	4.4514	4.95676	4.70318
MYO5A	-1.8017	-2.73758	0.0300542	0.588832	2.39053	1.48568	0.675929	6	7	6.75442	1.66913	2.94601	2.16863	3.5306	1.68409	2.18986	2.54539		0.677455	0.4255	3.09081	-1.50602	0.80869	0.0365568
DAF	-2.01013	-2.73273	0.0195044	2.46257	4.4727	1.57141	1.14812	7	7	10.9852	5.24623	3.82334	4.78833	4.33884	6.48322	3.46669	3.16225	5.27479	2.02555	2.01825	3.98201	1.71407	1.11278	1.1105
PSPC1	-1.06531	-2.7325	0.0193975	2.40354	3.46886	0.82862	0.614304	7	7	11.0653	3.61426	3.19771	3.43636	3.31544	2.3884	4.2303	4.09955	0.760011	3.10923	2.82453	3.1161	2.10008	2.19512	2.71974
DDX20	-1.35513	-2.72645	0.0499515	0.0932693	1.4484	0.134725	1.0977	3	5	4.19808		2.03544	0.692392	1.13914		3.04648	0.32853	0.128546	-0.0555848			0.206847
AOFA	-1.94023	-2.72416	0.0263227	1.48389	3.42412	1.52593	0.913433	6	7	7.92042	3.63151	1.785	2.95042	3.44155	3.3493	4.65022	4.16087	3.96154	0.255951	0.429189	2.67836	0.293515	1.2848
TBL2	-1.45535	-2.7201	0.0292138	2.2955	3.75085	1.18741	0.599083	6	7	7.13677	3.72689	3.8443	4.16738	2.63762	3.54649	3.75199	4.58124		2.08777	1.93349	4.48154	1.3542	2.65902	1.25698
CSTF3	-1.02629	-2.71505	0.0217461	1.12152	2.14781	0.537692	0.771651	5	7	9.99909	1.06406	1.89324	1.48811	2.45505	3.1885	2.97753	1.96819		1.7834	0.29079	1.06983		1.20665	1.25691
RASN	-0.70977	-2.7137	0.0237008	6.03216	6.74193	0.53006	0.388677	6	7	9.06603	6.54879	6.34267	7.39778	6.59245	6.37941	7.07847	6.85395	6.83941	5.6577	5.8483	6.10851		5.35943	6.37964
RAB6A	-1.27991	-2.70947	0.0207384	4.97801	6.25791	0.98903	0.707413	7	6	10.718	6.80189	5.00927		6.15761	6.74147	5.99934	6.83791	5.07309	4.3795	5.60571	6.90123	4.21715	4.30018	4.36918
WDFY1	-2.04585	-2.70702	0.0267306	1.83192	3.87777	1.61205	0.983037	6	7	8.01665	2.11116	4.78124	3.91637	4.95531	4.365	3.8135	3.20183		4.67465	1.33842	1.12734	0.566752	0.524183	2.76017
CYC	-1.52445	-2.70634	0.0236378	4.43708	5.96153	0.670183	1.30271	6	7	9.2222	5.09805	6.88311	6.16923	7.10899	3.44238	6.14706	6.88193	4.57591	4.47691		4.60153	3.12311	4.92189	4.92316
MIC13	-1.26855	-2.70333	0.0342509	2.8146	4.08315	0.088498	1.23044	2	7	6.20703	4.88665	3.13277	2.10156	3.26013	5.16096	4.93644	5.10353			2.87718	2.75202
PBIP1	-2.46649	-2.7024	0.0298861	0.954898	3.42139	0.720133	2.30491	7	7	7.16033	6.12034	1.14218	4.36647	-0.512905	4.69225	3.53852	4.60287	2.1885	0.0709116	0.683588	0.735761	0.785281	1.66228	0.557964
BAP31	-1.121	-2.70028	0.0299542	6.81559	7.93659	1.04813	0.32837	7	7	7.16658	8.07628	7.91296	8.19576	7.35172	8.34664	7.71509	7.95771	4.81632	6.20259	7.24932	7.72756	6.60244	7.3842	7.72668
NDUB3	-2.31839	-2.69615	0.0536103	5.0271	7.34549	1.58984	0.867516	4	7	4.04909	8.01818	7.16169	7.40846	5.49678	7.95084	7.65974	7.72275		7.03523		3.25864	5.35113		4.4634
RL12	-0.580415	-2.69215	0.0195926	6.9875	7.56791	0.401697	0.404979	7	7	11.9992	7.38569	7.79676	7.9652	7.82019	6.77076	7.75337	7.48341	6.93377	7.69315	6.52465	7.07149	7.27709	6.75021	6.66211
INP5K	-0.980601	-2.68964	0.0320303	3.26459	4.24519	0.699967	0.494488	5	7	6.78527	3.67294	3.7291	4.68484	4.31369	3.83071	4.67604	4.80899		2.52312	3.53923	3.98815	3.75996	2.51247
MATR3	-1.76901	-2.68406	0.025123	4.29323	6.06224	1.55081	0.797306	7	7	8.96474	4.81849	6.06492	5.24603	6.34482	6.10019	6.85447	7.00677	1.08129	4.95955	4.17892	5.07289	3.84091	5.70794	5.21112
ATP5L	-0.764823	-2.6685	0.0278179	7.24271	8.00753	0.60616	0.382564	6	7	8.20044	7.67322	7.90011	8.30497	7.87992	7.47998	8.24577	8.56879	7.08175		7.85943	7.94745	6.60489	6.53932	7.42344
MAP4	-1.93253	-2.6655	0.025749	1.66308	3.59561	1.7017	0.885308	7	7	9.02623	3.72152	4.91344	3.91657	4.0234	3.70532	2.47616	2.41287	-0.795214	4.09237	3.27445	1.53891	2.05973	0.0499077	1.4214
CLP1L	-1.74799	-2.66381	0.0223536	1.67405	3.42204	1.16218	1.19934	6	7	10.7972	2.94993	3.02766	3.86921	1.59856	2.96583	4.10953	5.43356	2.263	1.17112	0.419371	3.71867		1.32314	1.14901
DDB1	-1.1443	-2.66273	0.0302506	2.6474	3.79171	1.0696	0.385674	7	7	7.53426	3.20152	3.85373	3.58052	4.31803	4.15559	3.90979	3.52278	0.281232	3.28813	2.90517	3.40252	2.75269	2.84421	3.05788
AQR	-1.1526	-2.65748	0.0263312	-0.011041	1.14156	0.467744	0.966387	4	7	8.9272	0.354483	1.46012	0.562779	0.875416	0.0854499	2.8526	1.80005		-0.47083		0.0431562		0.615876	-0.232366
ANO6	-1.79917	-2.65633	0.0248071	-0.474298	1.32487	0.833334	1.49634	5	7	9.62091	1.4587	1.48397	3.09393	-1.81539	1.76332	1.60438	1.68516		-0.89029	1.01171	-0.902855		-0.854658	-0.735399
AT1B3	-1.01009	-2.65611	0.028837	5.34136	6.35144	0.810087	0.496714	6	7	8.04555	5.36959	6.67807	6.26637	6.50589	6.13661	6.67484	6.82874		4.34954	6.29638	6.28327	4.82661	4.86593	5.4264
ELYS	-1.28062	-2.65439	0.0227622	-0.656237	0.624387	0.731342	1.00267	6	7	10.7774	-0.206518	0.947808	0.36288	0.534361	-0.896053	1.90869	1.71953	-1.84092	-1.03572	-0.472029	-0.174486		0.271109	-0.685379
FACE1	-1.45154	-2.65346	0.0301448	2.50255	3.95409	1.00045	0.832757	5	7	7.68419	3.39621	4.54387	4.90529	2.45914	4.05994	3.79069	4.52352			2.45495	3.78585	1.05167	2.27377	2.94652
VPP3	-1.98613	-2.6526	0.0307249	-0.130149	1.85598	1.63266	0.902522	6	7	7.53168	2.09524	1.52766	3.25216	0.342186	1.58797	1.70808	2.47859	-0.871729		2.76872	0.793168	-0.926041	-0.899293	-1.64572
NSMA3	-2.52911	-2.65183	0.0290537	-0.764075	1.76503	1.7088	1.50966	5	7	8.03777	1.80112	2.09516	3.40836	-1.35341	1.44687	2.38007	2.57708	-0.544631		-0.62964	1.74714		-2.97227	-1.42097
RL38	-1.47062	-2.65161	0.114258	6.73089	8.20151	0.953837	0.174077	3	7	2.05737	8.38693	8.24546	8.08912	8.23337	8.40121	8.15226	7.90225		7.83083		6.23001	6.13184
CHD4	-1.26293	-2.64908	0.0281619	0.997203	2.26013	0.999927	0.651528	6	7	8.37673	1.38412	1.80738	1.90498	2.65759	1.99262	2.96146	3.11279		1.9586	0.391209	1.65898	-0.730266	1.48159	1.22311
MIMIT	-1.92073	-2.64656	0.021317	2.75911	4.67983	1.36703	1.3484	7	7	11.9977	6.48974	3.35483	3.97925	2.80461	4.91809	5.38536	5.82695	1.45581	4.70214	3.15935	4.46072	1.51706	1.92006	2.09861
PTCD3	-1.74917	-2.63796	0.0230826	1.08709	2.83625	1.08415	1.30629	6	7	10.9964	1.85494	2.54384	2.28878	1.47881	2.32958	4.67749	4.68032		1.78782	0.565388	2.55402	1.70922	-0.0835898	-0.0103307
SIN3A	-1.3638	-2.62942	0.0220884	-0.813301	0.550504	0.932995	1.00631	7	7	11.932	-0.0752981	-0.779815	0.102852	1.4529	-0.0604429	1.22215	1.99118	-1.70879	-0.887184	-1.81356	-0.297295	-1.52326	0.658466	-0.121488
SRP72	-1.399	-2.61231	0.0227231	1.14928	2.54828	0.984721	1.0188	7	7	11.9861	0.982064	2.20274	2.30623	3.86631	1.82851	3.58259	3.0695	0.532827	3.20949	0.454041	1.15918	1.31174	0.328488	1.04919
GCC2	-0.725885	-2.60706	0.0839325	0.988526	1.71441	0.437736	0.233688	3	4	2.85929			2.01854	1.51061		1.77552	1.55296		1.01406		0.538583			1.41294
RAB12	-1.41226	-2.59905	0.0265543	1.5874	2.99966	0.782975	1.09934	5	7	9.9903	5.2607	2.27561	3.35676	2.3786	3.06853	2.01534	2.64209			1.1709	2.50478	1.19096	2.33345	0.736881
DOCK6	-1.61047	-2.59496	0.0497309	-0.631525	0.97894	0.351544	1.31142	3	5	4.87561		1.42666	2.47899	-0.999024		1.50194	0.486138		-0.993844		-0.60888			-0.291851
GPTC8	-2.80363	-2.5915	0.0487743	0.824937	3.62856	0.667803	2.1765	2	5	4.99719	5.48957	1.21433	2.99677		6.28933		2.15282		0.352729					1.29714
CNBP	-0.892776	-2.59085	0.0412532	1.24011	2.13289	0.209474	0.762107	2	6	5.98588		2.12427	2.10488	2.61834	3.10402	0.824461	2.02138						1.09199	1.38823
RABL3	-1.22606	-2.58772	0.0405683	1.9055	3.13155	1.1002	0.399013	6	7	6.12608	2.70144	3.00706	3.24678	3.11875	2.7495	3.90038	3.19695	1.25016	3.43285	2.31461	2.68984	0.440175	1.30534
UBC9	-0.785215	-2.58511	0.032385	2.76376	3.54898	0.429885	0.567829	4	7	7.99196	2.64018	4.27361	3.64272	3.92828	3.83715	2.95932	3.5616		2.29577	2.51448			3.03297	3.21184
NOL9	-1.32426	-2.5808	0.0345692	0.940908	2.26517	0.505834	1.0936	4	6	7.44602	0.904932	0.874053	2.79346	3.0012		3.37464	2.64275		1.69947		0.685581		0.675483	0.703104
ARMX1	-1.3061	-2.5762	0.0335729	0.942675	2.24877	0.388079	1.23922	4	7	7.77801	2.81813	2.97062	3.71894	-0.00388509	1.96841	2.85164	1.41755		0.828094	0.510071	1.44192	0.990618
PGES2	-1.33214	-2.57262	0.0277658	0.760977	2.09312	0.734133	1.05943	5	7	9.99983	0.273577	1.92364	1.78238	2.39034	1.66133	3.13621	3.48435		-0.0585442	0.394832	1.26295		1.76025	0.44539
STT3B	-1.39427	-2.57215	0.027234	5.23685	6.63112	1.20378	0.779578	7	7	10.2799	7.17095	6.39917	7.1673	5.11974	6.23632	7.09307	7.23129	5.34462	3.59545	6.82553	6.61288	4.78423	4.08137	5.41389
PKCB1	-1.52016	-2.56643	0.028491	-0.401394	1.11876	0.759945	1.28351	5	7	9.79548	-0.15771	0.887838	1.50073	1.76137	-0.890704	2.86451	1.8653	0.497487	-0.819922		-1.23491	-0.758573		0.308949
TIM50	-1.36933	-2.56228	0.0411843	3.79784	5.16717	1.23325	0.47418	6	7	6.26365	5.06763	4.99601	5.73051	4.38339	4.90267	5.43836	5.65164	3.42473		4.25637	4.69659	1.56004	3.85291	4.99639
CNDP2	-1.53687	-2.55539	0.0269609	-0.042413	1.49446	1.23284	0.931398	7	6	10.8683	1.5295	0.668343	1.66686	3.20063		1.19743	0.703991	1.23554	-1.211	0.605325	-1.77077	1.35256	0.327986	-0.836528
CXA1	-2.2845	-2.55334	0.0268658	2.63493	4.91942	1.44422	1.78048	6	7	10.9818	6.8545	6.21947	3.09686	2.3422	6.75233	4.7256	4.44498		1.58595	3.66785	3.83724	1.02233	1.412	4.28418
GP180	-2.02589	-2.552	0.0417214	1.09035	3.11624	0.17275	2.0753	2	7	6.27241	5.62912	3.7189	2.72307	0.985806	6.0022	1.16105	1.59354						0.968198	1.2125
PDIP2	-1.3743	-2.54949	0.0255567	1.28944	2.66374	0.975972	1.03995	7	7	11.9519	1.97525	3.00778	2.99165	3.73703	0.647523	2.90712	3.37983	0.857787	1.68793	0.313384	1.13061	0.857414	0.880058	3.29888
XPO2	-2.18407	-2.54892	0.0298414	-0.605716	1.57835	1.35903	1.59803	5	7	9.57573	-1.41548	1.24144	2.16926	3.94656	1.36276	2.05785	1.68607			0.357621	-1.01822	-2.63218	-0.607617	0.871818
AIMP2	-1.39354	-2.54727	0.0458602	2.86284	4.25638	0.337536	1.29685	6	6	5.67433		3.64983	3.96727	6.30312	2.61166	5.18931	3.8171		3.3929	2.58955	3.17123	2.74262	2.58812	2.69262
RAP2C	-1.03767	-2.54724	0.0316032	1.69131	2.72898	0.504496	0.846317	4	7	8.89953	3.77064	1.83741	3.0684	1.91259	3.73591	1.94695	2.83093		1.74828		1.14894		2.35134	1.51666
CN37	-1.16615	-2.54638	0.0399486	0.860995	2.02715	0.235685	1.17913	5	7	6.65871	1.6869	1.79015	2.77852	-0.28503	3.20589	2.95952	2.05408	0.971398	0.63629		0.579901		1.02459	1.09279
PRC2C	-1.30825	-2.53815	0.0294713	-0.0363788	1.27187	0.716937	1.06775	5	7	9.9929	1.29593	-0.241799	0.669528	1.36347	3.17444	1.84663	0.79488	-0.103653	0.335895		-0.856407	0.965382		-0.523111
FSCN1	-1.32079	-2.53054	0.027434	1.51134	2.83213	1.09045	0.847263	7	7	11.3094	1.72992	3.44514	2.77901	4.35692	2.7149	2.41637	2.38263	1.12987	1.76679	2.15816	2.73545	-0.150308	0.410843	2.52859
RL19	-1.12259	-2.52382	0.0318454	5.53784	6.66043	1.03318	0.563429	7	7	9.27868	6.30264	7.28985	6.92979	7.01065	5.60688	6.91792	6.56528	4.9917	6.28933	7.0566	5.49291	6.00165	5.06705	3.8656
TFR1	-1.07073	-2.51813	0.0371455	5.93657	7.0073	0.921815	0.523687	6	7	7.66047	6.99719	7.16694	7.16355	7.02372	5.8861	7.50412	7.30947	6.03538		4.32654	7.11013	5.68409	6.35742	6.10585
PRP19	-1.27046	-2.51014	0.0371391	4.80407	6.07453	1.2476	0.486495	7	7	7.78344	5.35511	6.06047	6.12646	6.54576	5.49039	6.37	6.57355	3.72968	7.17772	5.40802	5.2742	4.244	3.83794	3.95695
MTX2	-1.159	-2.50623	0.0378031	5.14075	6.29975	1.00227	0.570121	6	7	7.66662	6.39244	5.94134	5.96397	5.60253	6.09245	7.18934	6.91616	5.39026	5.98636	5.15429	6.27638		3.55109	4.48613
CAN2	-1.16032	-2.50178	0.0286274	2.88014	4.04046	0.956325	0.76889	7	7	11.471	3.46902	3.40077	4.27477	5.08017	3.0644	4.88812	4.10598	2.18882	3.98929	2.65848	3.36019	1.16273	3.46429	3.33721
SNR40	-1.74341	-2.50154	0.0378716	1.97158	3.71498	1.27201	1.06527	5	7	7.71998	2.48922	2.7563	4.19975	2.79579	3.87901	5.30796	4.57684		3.12813		3.22801	0.204063	1.31467	1.983
SC22B	-0.960371	-2.50019	0.0329332	6.02668	6.98705	0.889443	0.491652	7	7	9.3535	6.62907	7.36453	7.45588	6.40598	6.39524	7.19204	7.46661	4.3869	6.09377	6.05674	7.1372	6.0111	5.65108	6.84996
RBP56	-0.765922	-2.49971	0.0379431	3.94097	4.70689	0.662196	0.381573	6	7	7.72928	4.31537	4.54451	5.3098	4.67132	4.32061	5.12831	4.65832		3.51389	3.59441	4.05358	3.08692	4.70833	4.68869
TCPH	-0.90973	-2.49414	0.0302244	3.64447	4.5542	0.555375	0.789201	7	7	10.7723	4.28963	4.19947	3.48326	5.95598	4.30835	5.1576	4.48514	3.36699	3.3402	4.02692	3.51341	3.10685	4.73111	3.42583
CISY	-1.10467	-2.49267	0.0357088	4.55664	5.6613	1.06214	0.49661	7	7	8.50364	5.42363	5.90769	4.72195	5.45883	6.01481	5.97936	6.12284	3.74274	4.38152	3.74811	5.24629	3.19866	5.61335	5.96579
ATPD	-0.354478	-2.48986	0.0307806	8.17346	8.52793	0.21246	0.311035	7	7	10.5981	8.90294	8.10065	8.35861	8.24614	8.90266	8.60773	8.5768	7.97561	8.32931	8.00701	8.37195	7.87217	8.35248	8.30565
VDAC3	-1.33979	-2.48287	0.0340012	5.76377	7.10355	1.25163	0.686789	7	7	9.31274	6.77795	6.12259	7.51079	6.60056	6.89615	7.86222	7.95463	5.399	4.08807	6.46168	7.5752	4.48301	5.56965	6.76978
MGST1	-1.07	-2.47295	0.0482542	5.35921	6.42922	0.00696216	1.1447	2	7	6.00155	6.31024	4.36519	7.59953	5.85858	6.11769	7.38363	7.36966			5.35429				5.36414
XRCC5	-1.66645	-2.46753	0.0296289	0.633383	2.29983	1.26992	1.25697	7	7	11.9987	1.24687	2.7959	1.95207	4.27289	0.366746	2.74745	2.71688	1.54212	-0.457665	0.831739	0.0468025	-1.24189	2.47636	1.23622
GORS1	-0.538627	-2.46382	0.0474383	2.77359	3.31221	0.339646	0.307836	4	5	6.22297	3.65266		3.01445	2.98935		3.32784	3.57678			2.28357	3.06832		2.87518	2.86727
DCTN4	-1.75401	-2.46323	0.0337176	0.723718	2.47773	1.06768	1.39766	5	7	9.89841	5.23189	2.65519	2.67947	2.2844	1.93651	1.93244	0.624197		0.024169	0.353559	0.137818	2.60498	0.498068
TMM70	-2.24513	-2.45696	0.0589712	2.92977	5.1749	1.22493	1.531	3	7	4.84986	5.65359	4.93229	4.05398	2.38598	6.01476	6.69299	6.49068	2.21388	2.23127		4.34415
ADRO	-1.40028	-2.45247	0.0496239	0.638103	2.03838	0.570344	1.043	3	5	5.99999		1.48194	2.07882	0.686577		3.45624	2.48833	1.10422	0.807963		0.0021265
RT25	-1.42531	-2.4521	0.0370957	2.12354	3.54885	0.797968	1.12387	5	6	8.83685	2.38465	3.36448	2.56491	3.19752		5.2321	4.54942		3.15178	1.22265	2.07549		2.66383	1.50394
SMC3	-1.09343	-2.45097	0.0409452	2.33319	3.42663	1.10259	0.421275	7	7	7.71523	4.09125	2.89954	3.21281	3.44439	3.2132	3.8918	3.23342	1.24849	4.42732	2.93104	1.76317	1.59004	1.70945	2.66284
STMN1	-1.12865	-2.4476	0.0380393	4.13073	5.25938	0.445568	1.06818	4	7	8.61306	3.30764	6.40817	5.43159	5.37011	4.4629	6.21276	5.62251		3.5813	4.27311		4.64297		4.02556
NSA2	-1.87728	-2.44672	0.0839117	0.753713	2.631	1.16248	0.983726	3	7	3.31201	2.95188	2.77517	1.73055	3.54883	0.88723	3.57243	2.95088		0.0592186		0.106168	2.09575
PSD11	-1.70955	-2.43302	0.0318668	1.77148	3.48103	1.22615	1.39733	7	7	11.8007	1.73193	5.3222	3.1953	5.45777	2.52954	3.17864	2.95184	1.47038	0.158673	1.15891	1.97963	4.04616	1.18702	2.39957
CPSF1	-1.19421	-2.42923	0.0318223	-0.237925	0.956283	0.896632	0.942201	7	7	11.9706	-0.545818	0.953553	1.1797	1.60779	-0.0329822	2.15719	1.37453	-1.79809	-0.589485	0.55619	0.917248	-0.379201	-0.557271	0.185139
GPX1	-1.32995	-2.42657	0.0326562	3.69527	5.02523	1.12241	0.918119	7	7	11.5462	6.02187	5.5822	5.61441	3.27411	4.49093	4.94661	5.24646	3.11678	2.3493	4.90206	4.96879	4.13138	4.1082	2.29041
VAMP5	-2.20536	-2.42569	0.051062	3.09968	5.30504	1.10793	1.70935	3	7	6.05978	7.49072	4.96981	3.33627	4.12214	7.8682	4.68618	4.66194			2.41846	4.37809	2.50249
ARVC	-1.24934	-2.42479	0.0498613	-0.262736	0.986608	0.130617	1.34851	3	7	6.25657	1.10616	1.00125	0.0301027	-1.19993	0.958002	1.96375	3.04693		-0.408073	-0.224975				-0.155159
PPIB	-0.573382	-2.4231	0.0398892	7.64209	8.21547	0.566941	0.265595	7	7	8.51256	8.03473	8.25504	8.36298	8.42427	7.70808	8.25322	8.46999	6.36627	7.93031	7.87723	7.91505	7.86467	7.71855	7.82256
PLPL6	-1.24443	-2.41631	0.0383597	0.971812	2.21625	1.20154	0.642639	7	7	9.17309	2.76068	2.04607	2.7207	0.926783	2.38331	2.03997	2.63622	-0.335181	1.19822	0.942127	2.46339	1.32479	2.06801	-0.858682
PPIL1	-1.59445	-2.40374	0.0536331	3.9818	5.57625	0.795539	1.17226	3	6	5.91247	7.15913	5.46636		4.49427	6.88418	4.84682	4.60672		4.79914		3.21002			3.93623
SF3B3	-1.38723	-2.40366	0.0430484	3.61448	5.0017	1.41244	0.580137	7	7	7.9684	4.09722	4.78857	4.834	5.17956	4.69418	5.69428	5.7241	1.69185	5.34733	3.59763	4.85413	1.80538	3.71991	4.28509
UB2G2	-0.517596	-2.39521	0.0564594	6.04552	6.56312	0.0929593	0.512741	3	6	5.61829	5.81541	6.93996	6.96327	6.74464		6.90389	6.01154			6.14974	5.97114			6.01569
RAB7A	-0.379438	-2.39269	0.0340181	7.41995	7.79939	0.288944	0.304218	7	7	11.9683	7.53898	7.85204	7.94931	7.90099	7.23654	8.07293	8.04494	7.48956	7.43889	7.59703	7.75368	6.82583	7.41599	7.4187
KDEL1	-0.761858	-2.39259	0.0657172	1.14382	1.90568	0.158269	0.682071	3	5	4.67483		1.58926	1.4723	3.05622		1.9959	1.41471				1.26178		0.963954	1.20573
JAGN1	-1.83738	-2.38806	0.0539898	2.52367	4.36105	0.0801788	2.03344	5	7	6.02611	2.05354	6.40974	4.89865	2.97717	7.45661	2.49408	4.23758			2.41374	2.46256	2.58379	2.58718	2.57108
RAB5C	-1.67033	-2.38015	0.0398372	4.87795	6.54827	1.61492	0.916208	7	7	9.49988	6.99567	4.58978	7.11542	6.32095	7.27376	6.74166	6.80066	2.96315	3.01349	6.67187	3.84608	5.52486	5.3579	6.76829
ADNP	-1.4721	-2.37383	0.0591707	-0.298105	1.174	1.04564	0.882382	4	7	5.48422	-0.0244564	1.05481	0.142771	1.51908	1.22172	2.40026	1.90379			-1.09677	1.23647	-0.75699		-0.575131
HECD1	-0.647341	-2.37324	0.0658621	0.343108	0.990449	0.147293	0.579524	3	5	4.79648		0.680599	0.744339	2.01026		0.618488	0.898557		0.241684	0.275582	0.512057
ATPA	-0.571601	-2.37296	0.0357378	7.58928	8.16088	0.486585	0.411584	7	7	11.6788	8.05507	7.73304	8.16186	8.2792	7.59154	8.66273	8.64271	7.75181	8.1449	7.48919	8.2259	6.88595	7.42193	7.20525
CAV2	-1.73089	-2.36583	0.06464	2.52839	4.25928	0.499844	1.43239	2	5	4.96542		5.10141	6.04242	2.23816		4.11654	3.79789				2.17495	2.88183
SYSC	-1.94014	-2.36461	0.045163	-0.240222	1.69992	1.46241	1.31086	5	7	8.12476	0.602166	3.42351	3.17525	2.49765	0.81806	1.19605	0.186741			2.04938	-1.83334	0.155605	-0.88884	-0.683915
COR1B	-1.63417	-2.35949	0.062918	0.0858624	1.72003	0.5629	1.44277	5	5	5.19018	2.00489	0.0910937	0.795551	3.89448			1.81415	0.261161	-0.672797			-0.321612	0.627208	0.535352
RNPS1	-1.11262	-2.3585	0.0477819	6.33041	7.44303	1.1723	0.428425	7	7	7.57463	6.66845	7.73463	7.64886	7.60288	7.00546	7.75886	7.68208	4.67188	7.4042	7.30435	6.67417	7.47041	5.72681	5.06106
DERL1	-0.869664	-2.35688	0.0384415	3.21303	4.08269	0.560661	0.76573	6	7	10.7883	3.30162	4.32274	5.05639	3.18094	3.42067	4.57362	4.72287	2.99044		2.78787	3.63856	2.86116	2.83986	4.16026
RT22	-1.51359	-2.35484	0.0394648	1.85891	3.3725	1.19641	1.10544	6	7	10.3683	3.40246	2.4905	2.79761	3.21151	2.03628	5.09533	4.57381	1.09406	2.86847	-0.0340812	2.85056		2.80785	1.56659
CUL4B	-1.28348	-2.34798	0.0393659	1.48125	2.76473	0.990342	0.97335	6	7	10.633	2.2127	2.60184	2.27075	3.76784	4.39331	2.52159	1.5851	1.08782	1.19923	3.48475	0.949777	1.24999	0.915922
SPF45	-1.2626	-2.34193	0.0442765	2.4265	3.6891	0.566764	1.21345	4	7	8.87011	4.37074	5.24357	4.68139	3.3936	2.17789	2.08732	3.86916		2.52313	2.19948	1.82301	3.16038
PR40A	-1.25006	-2.34072	0.0626509	1.95051	3.20058	1.28377	0.271514	6	7	5.38416	3.63499	2.76154	3.28373	3.07069	3.36632	3.10431	3.18247	1.93673	3.96506	2.41036	0.476941		0.647116	2.26688
P2RX4	-1.72721	-2.33951	0.0613388	2.08918	3.81639	0.87459	1.20434	3	5	5.54862	5.85665	3.59971	3.55877		3.42045		2.64636			2.96688	1.21774			2.08291
MYEF2	-1.05625	-2.33774	0.0639991	1.65889	2.71514	0.586851	0.790843	3	7	5.26219	1.84304	3.60457	2.87776	1.81047	2.24535	2.85306	3.77172				0.98694		1.919	2.07073
NEUR1	-0.82765	-2.32492	0.0807001	1.51849	2.34614	0.251961	0.616399	2	4	4		1.93322		3.09727		1.75993	2.59414						1.34033	1.69665
MGAT1	-0.985751	-2.32194	0.0678398	1.20572	2.19147	0.0161105	1.03965	3	6	5.0048	1.14843	1.82398	3.19369	1.09042		2.30368	3.58863					1.21969	1.20938	1.18809
EXOC5	-0.911845	-2.32037	0.0446789	-0.367522	0.544322	0.470658	0.90695	6	7	9.26505	-0.33963	0.56404	0.558148	2.30274	-0.399731	0.271243	0.853449	-0.532401	-0.192928	0.198302	-1.19615		-0.315533	-0.166422
EMD	-1.04271	-2.31779	0.0457982	4.55421	5.59692	0.545815	0.946223	4	7	8.95157	5.70491	4.62571	6.74148	4.30122	5.16689	6.00272	6.63551				4.72928	5.00852	4.7184	3.76065
TMX3	-1.25714	-2.31531	0.0558952	5.42957	6.68671	1.23356	0.537043	6	7	6.61117	6.88538	6.417	6.96825	5.56893	6.93434	7.08966	6.94339		3.68907	5.4702	6.90309	4.2958	5.7968	6.42245
SK2L2	-1.21043	-2.31464	0.051009	0.0978682	1.3083	0.411998	1.29486	5	7	7.59254	0.579113	1.56052	0.246805	3.19664	-0.584331	2.08042	2.07892		-0.107244	-0.137851	-0.0517924	-0.045404	0.831633
DDX42	-1.42946	-2.31235	0.0596866	1.15175	2.58121	1.44014	0.50537	6	7	6.055	1.77847	3.17981	2.36909	2.90109	2.5195	3.08806	2.23243		2.6498	3.10259	0.973973	-0.000877491	-0.505795	0.690807
GRP75	-0.510807	-2.30908	0.0399173	6.7487	7.25951	0.441315	0.384444	7	7	11.7786	6.736	7.37311	7.2419	7.53147	6.72413	7.61522	7.59474	6.28108	7.22379	6.21588	7.17542	6.36971	7.00305	6.972
FUMH	-0.809315	-2.30278	0.0399974	4.65369	5.46301	0.660556	0.654438	7	7	11.999	4.83305	5.11489	5.60144	6.05759	4.51291	5.8843	6.23685	3.97619	5.06934	3.64073	5.23484	4.66421	5.43627	4.55427
SERA	-1.80165	-2.29995	0.0586358	1.5602	3.36185	1.79934	0.719817	6	7	6.366	3.48897	3.93694	2.03504	3.95583	4.02933	3.03028	3.05652	2.59139	0.0796933	4.18287	0.779682	2.35964		-0.632087
MIC19	-1.19307	-2.29891	0.0446303	4.64633	5.8394	1.17435	0.711496	7	7	9.8818	6.64837	5.96004	5.35414	4.64771	6.67789	5.74111	5.84654	2.75408	6.05575	5.75769	5.46095	4.41116	3.9331	4.15156
RM11	-1.16327	-2.29879	0.055742	4.11158	5.27485	0.221765	1.27294	2	7	6.87684	5.98079	3.46035	6.73059	3.75727	4.86234	6.27407	5.85853			3.95477	4.26839
RL34	-1.802	-2.29686	0.0516727	3.82528	5.62728	1.42825	1.20531	5	7	7.76509	6.04475	6.41381	5.87654	5.5241	7.0179	3.21737	5.29647		5.76918	4.84492	2.31244		3.08981	3.11004
ROAA	-1.23372	-2.29684	0.0442073	4.76334	5.99706	0.729582	1.18263	6	7	10.1175	4.83007	5.07144	6.31338	6.47446	4.61091	6.94025	7.7389		5.02045	4.12234	3.59058	5.29824	5.25198	5.29646
K1C18	-2.18825	-2.29246	0.0444171	2.67104	4.85929	2.13131	1.35482	7	7	10.1684	6.64556	3.36723	3.27593	4.55382	4.92395	6.57858	4.67	6.19975	3.96813	1.83582	0.0202673	2.23106	3.77003	0.672248
CPNE1	-1.16536	-2.28843	0.0567431	3.25879	4.42416	1.30183	0.347192	7	7	6.84923	4.00048	4.04486	4.37379	4.34936	4.96293	4.5055	4.73216	1.68233	4.16056	2.35542	4.33098	4.03451	4.58438	1.66334
SAHH	-1.3306	-2.28713	0.0479967	3.90454	5.23514	1.36691	0.70767	7	7	9.00079	4.89051	5.93879	5.66162	5.6613	5.75509	4.72834	4.01031	5.15013	3.88183	5.17934	3.48226	5.15847	2.84844	1.63133
G3BP1	-1.79319	-2.28608	0.0437116	1.41193	3.20512	1.41019	1.40956	6	7	10.6946	2.45226	4.57126	2.8481	4.8908	0.684847	3.50225	3.48632		2.32467	3.43173	-0.0295255	2.08087	0.0383183	0.625503
EPN4	-0.920799	-2.28292	0.0434669	2.99431	3.91511	0.635174	0.817382	6	7	10.9251	4.41185	3.94777	2.43485	3.87121	4.92321	4.4335	3.38334		1.73158	3.07508	3.06624	3.37557	3.35038	3.36698
CUL3	-1.09944	-2.28108	0.0537392	0.613146	1.71259	1.0363	0.516334	6	5	7.58168		1.88872	1.66039	1.07869		2.46797	1.46716	0.0925676	0.777844	2.15634	-0.989294		0.954977	0.686436
HEXB	-1.45466	-2.28072	0.0416954	1.696	3.15066	1.15739	1.22802	7	7	11.9581	1.91699	3.45518	2.6139	4.58569	1.43985	3.45467	4.58832	2.20776	1.67179	0.873274	3.74861	0.071602	1.99718	1.30178
SCMC1	-1.08667	-2.27812	0.0435241	4.83421	5.92088	1.01303	0.752648	7	7	11.077	5.64911	5.27686	6.56056	4.6387	6.31336	6.39557	6.61203	4.33786	3.01423	5.8288	5.769	4.73988	4.52218	5.62755
USO1	-1.76011	-2.27644	0.0465698	0.880368	2.64048	1.5017	1.2465	6	7	9.80096	3.39409	1.81867	2.16033	2.24677	5.13666	1.50625	2.22058	0.564262	1.40395	3.60155	0.0543379	0.378475		-0.720369
STX12	-1.04827	-2.27528	0.042891	3.1622	4.21047	0.945978	0.76875	7	7	11.5182	3.78129	4.75974	4.91875	4.27784	2.68117	4.44273	4.61179	3.25723	3.08319	3.22823	4.18667	1.38284	2.82499	4.17228
PCBP1	-0.733331	-2.26788	0.0428309	5.38056	6.11389	0.571985	0.636192	7	7	11.8667	5.2215	6.44112	6.26039	6.79305	5.229	6.60544	6.24671	4.35377	5.33323	5.74707	5.37948	6.11439	5.02644	5.70953
EDC4	-1.82962	-2.26398	0.0526351	0.64372	2.47334	1.70972	1.07764	6	7	8.19329	0.766036	2.75185	2.76063	2.91871	1.19605	3.7007	3.21939		-0.73953	-0.91681	2.36658	-1.0738	1.98685	2.23903
ODP2	-1.2514	-2.26127	0.0431371	3.31705	4.56845	1.05331	1.01702	7	7	11.9853	3.81002	4.45398	5.05708	4.65501	2.79201	5.78523	5.42581	1.83831	2.73971	4.19196	4.94936	3.55382	3.42822	2.51797
F162A	-1.69519	-2.26031	0.0670069	4.02578	5.72097	1.24949	1.09779	4	7	5.67792	6.56626	4.39584	5.32086	4.13917	6.58894	6.32457	6.71118	3.28521	3.43951		5.8957	3.48271
RM19	-1.5205	-2.2578	0.0509958	2.03287	3.55337	0.91569	1.30957	5	6	8.80121	3.23747	1.78526	3.73803	2.5318		5.06481	4.96286		1.76936	1.53848	0.90746		2.96778	2.98128
CRIM1	-1.36376	-2.2568	0.0560978	1.13954	2.50331	0.890907	1.08035	4	7	7.50897	3.07806	1.71568	3.79888	1.59341	0.912277	3.14616	3.27867		0.494553	0.346201	2.24687		1.47055
FPRP	-1.9528	-2.24429	0.0581659	1.18863	3.14142	0.93398	1.80675	3	7	7.30029	5.87134	1.6197	2.02229	1.31261	5.39524	2.95212	2.81667	0.94911			2.21904			0.397729
HYOU1	-0.81735	-2.2417	0.0454356	5.12715	5.9445	0.744958	0.612887	7	7	11.5703	5.13385	5.64055	6.06962	6.6847	5.37914	5.97155	6.73211	3.78749	5.99453	4.67095	5.61021	4.85211	5.5425	5.43229
S10AB	-0.358705	-2.23753	0.0480968	7.92457	8.28327	0.235397	0.352832	7	7	10.4581	8.68371	8.55043	8.30213	8.29591	7.56711	8.32071	8.26289	8.40062	8.02496	7.79295	7.70312	7.86438	7.76403	7.92189
SNAG	-1.11084	-2.22937	0.0563523	0.318041	1.42888	0.609577	0.965552	4	6	7.99998	0.107772	0.602693	2.66045	2.04097		1.19597	1.96543		-0.291108		0.776777	0.9041	-0.117604
ALDOA	-1.12716	-2.22335	0.046569	3.49995	4.62711	1.01237	0.879891	7	7	11.7715	3.13615	4.74595	4.007	5.76597	4.34363	5.19176	5.19934	3.55065	1.68632	4.86447	3.23321	3.14612	3.63524	4.38365
S27A4	-1.29771	-2.21782	0.0727372	0.410074	1.70778	0.987577	0.830555	4	7	5.46839	2.2214	2.4682	1.98793	-0.0556905	1.90711	1.52731	1.89821			0.871968	1.04543	0.785282	-1.06238
U520	-1.17796	-2.21743	0.0521394	2.91948	4.09744	1.21998	0.69792	7	7	9.5473	2.94552	3.68864	4.15155	4.43047	3.78053	4.61524	5.07014	0.747654	4.56671	2.43122	3.23087	2.33716	3.58795	3.53478
ZCCHV	-1.32076	-2.21719	0.0578038	1.13384	2.4546	0.890371	0.990691	5	5	7.91051		3.54393	1.35539	3.2202		1.5026	2.65089		2.59786	0.960456	0.837194		0.180977	1.09274
GNAI3	-0.993729	-2.21699	0.0522722	3.2771	4.27083	0.886092	0.700271	6	7	9.51412	5.32158	3.24975	4.79168	4.41653	4.1834	4.36019	3.57265	3.07047		3.59772	4.2925	2.68631	4.06968	1.94591
VATA	-1.84309	-2.21437	0.0601709	1.32461	3.1677	2.07934	0.725099	7	7	7.43797	2.5412	4.14832	3.64277	3.97092	2.67204	2.46175	2.73689	1.5577	-0.651149	5.0383	0.844186	3.01267	-0.438247	-0.0911801
VDAC1	-1.19129	-2.21429	0.0482771	5.56462	6.75592	0.869908	1.12667	7	7	11.278	5.76086	5.85824	7.12305	6.69036	5.54985	7.75797	8.55107	5.89972	4.0341	5.39095	6.57687	5.06061	5.54432	6.44576
RL9	-1.40744	-2.21194	0.0471435	2.59207	3.9995	1.16866	1.21173	7	7	11.9843	2.47849	3.49399	3.96692	5.31727	2.5622	5.2679	4.90975	1.94539	3.61303	2.00343	3.17888	0.468513	3.45142	3.4838
SWP70	-1.83941	-2.2118	0.0611706	1.04827	2.88768	1.20759	1.40082	4	6	7.28108	2.15265	4.69448	2.02314	4.67492		2.08538	1.69549			2.85143	0.297382	0.467522	0.576741
RBBP5	-1.19182	-2.21025	0.0940513	0.294763	1.48659	0.426498	1.00873	5	4	3.86021			1.68993	0.00535395		2.14453	2.10654		0.275366	-0.220714	0.966571		0.20621	0.246383
RS21	-0.690725	-2.21009	0.0473086	7.00717	7.6979	0.572582	0.596563	7	7	11.9799	8.24585	7.90835	6.51749	8.21421	7.67879	7.91294	7.40768	7.1216	7.32979	6.25822	7.64658	7.55819	6.87666	6.25919
ZN638	-1.60388	-2.20757	0.206212	0.255883	1.85976	0.937813	0.785346	2	7	1.4313	3.1074	1.36517	1.52365	1.68494	0.705918	2.24914	2.38214				-0.407251			0.919017
DSRAD	-1.5829	-2.20735	0.0571905	0.016391	1.59929	1.51059	0.968213	6	7	8.28515	0.37949	3.25038	1.89702	2.35188	1.04788	1.03711	1.23124		2.66508	-1.32928	-0.233716	-0.980016	-0.885395	0.861674
RL10	-1.00859	-2.20481	0.0485678	4.77819	5.78679	0.937071	0.765987	7	7	11.5433	4.80406	6.14758	6.28988	6.2107	4.54182	6.2526	6.26087	3.78492	5.91725	4.20195	5.73463	3.93709	4.23552	5.63598
PPGB	-1.14663	-2.19682	0.0698318	1.01758	2.16421	0.848165	0.805052	4	7	6.07848	1.17597	2.8495	1.46984	2.87036	1.48157	2.14046	3.16174		2.13934	1.19624	0.261757	0.472963
ARL8B	-0.860561	-2.19092	0.0665751	4.26766	5.12822	0.755244	0.491132	5	6	6.65483	5.94365	4.70166	5.35862		5.15056	4.58408	5.03074	5.59145	4.19075	3.90773	3.83731			3.81105
CATB	-0.645182	-2.18662	0.0627938	6.65666	7.30184	0.737361	0.256357	7	7	7.42959	7.02291	7.64061	7.5542	7.38084	6.98305	7.14822	7.38306	7.46222	6.96773	5.66891	6.90016	5.55517	6.98591	7.05653
CKAP5	-1.15052	-2.18193	0.054703	0.0591251	1.20965	0.680267	1.18591	6	7	9.76412	-1.28644	1.99926	2.15548	1.98612	0.988651	1.4044	1.22007	0.697422	-0.0581692	1.04728	-0.518712	-0.133949		-0.679123
RL15	-0.874151	-2.1789	0.0616663	3.15698	4.03113	0.98692	0.390713	7	7	7.83567	4.56294	4.58962	3.93508	3.85695	3.6885	3.95092	3.63388	3.43874	5.07516	2.67611	2.61314	2.09388	3.56013	2.64167
TMTC3	-0.954941	-2.17373	0.058356	1.75446	2.70941	0.461806	1.02586	5	7	8.82228	3.18025	3.01594	3.6661	0.498571	3.12529	2.84181	2.63789	2.07578	2.07904		2.10597		1.36417	1.14736
PSD13	-1.1135	-2.17102	0.0565633	2.09855	3.21205	1.18193	0.666676	7	7	9.46697	2.60088	3.22321	3.03909	4.61162	3.07393	3.25592	2.67972	1.23157	3.94081	3.02698	1.05213	0.650547	2.3306	2.45722
RS2	-0.731534	-2.16222	0.0526929	6.78281	7.51434	0.702799	0.554365	7	7	11.3826	7.62898	7.53432	7.5573	8.09821	6.37533	7.94707	7.45919	7.08764	7.60924	5.53746	6.55086	6.56949	6.626	7.49897
PSMD8	-1.49815	-2.15899	0.0575804	0.538646	2.0368	0.906953	1.59626	7	7	9.50825	-0.866377	4.16805	1.86661	3.51189	1.79089	1.81879	1.96773	-0.208364	0.794855	0.93573	0.587336	2.15497	0.143305	-0.637311
ICT1	-2.16254	-2.15869	0.0982233	2.90247	5.06501	1.44182	1.47456	3	7	3.93156	6.79032	3.31348	3.96763	3.43861	5.33408	6.27222	6.33871				1.32375		3.23401	4.14964
GSLG1	-1.22813	-2.15807	0.0551004	2.40808	3.63621	1.25168	0.836852	7	7	10.4707	3.59849	3.66945	3.75915	2.09336	3.45869	3.94257	4.93178	0.630066	2.29066	3.16654	4.343	1.23953	2.10768	3.07907
ALG2	-1.41432	-2.15256	0.055633	2.41592	3.83024	0.941405	1.40996	6	7	10.4667	2.30852	2.46736	4.02937	5.08771	2.3997	5.28975	5.22929	2.10968	3.13041	1.44862	3.1379		1.24893	3.41998
SPRC	-1.05107	-2.14866	0.0777185	5.43274	6.48381	1.1589	0.328891	6	7	5.69157	6.95028	6.24916	6.02909	6.65992	6.32203	6.37523	6.801	3.20571	5.49554	6.51103	5.9993		5.95034	5.43454
DJC11	-1.47729	-2.14705	0.0614087	0.828027	2.30532	1.1824	1.16476	5	7	8.68505	1.49728	2.63458	2.55532	0.592303	1.68971	2.97883	4.18922		0.00788763	-0.174272	2.53295		0.179204	1.59436
DDX6	-1.17625	-2.14012	0.0555968	2.70694	3.8832	0.901922	1.0796	6	7	10.9985	2.44706	4.04738	4.03775	5.6093	2.59189	4.22756	4.22145	1.67347		3.21259	2.66571	1.57408	3.48656	3.62926
S12A7	-1.0197	-2.13097	0.0622903	0.341592	1.36129	0.507584	1.07329	4	7	8.89167	0.38508	3.02467	1.38363	0.341551	0.280858	2.14938	1.96384	0.744653	-0.336227		0.716964		0.240978
PLD1	-1.72845	-2.13082	0.0556706	0.691235	2.41968	1.68432	1.33002	7	7	11.3877	0.715683	3.07464	4.0255	1.20835	1.50766	2.43607	3.96988	0.87292	1.57879	0.452293	3.93657	-0.485831	-0.645535	-0.870563
SCAM1	-1.2811	-2.12963	0.0601931	2.49989	3.78099	0.736125	1.3321	5	7	9.59605	2.34683	4.5947	6.14327	2.31779	3.75112	3.36098	3.95224		1.74523	2.12279	3.70163		2.53261	2.39719
AT131	-1.55285	-2.12895	0.0567012	1.58659	3.13944	1.22243	1.40739	6	7	10.9918	3.59399	2.76389	5.11431	0.498661	3.82003	2.78	3.40517	2.944	-0.0226387	1.44589	3.0216		0.608693	1.52199
RAB18	-0.72096	-2.12525	0.0582509	6.41352	7.13448	0.745609	0.499634	7	7	10.4843	6.4228	7.31461	7.49175	7.37895	6.40118	7.54938	7.38268	6.27593	5.70125	7.30716	7.08993	6.99281	5.33174	6.19581
ITA6	-2.57282	-2.12482	0.0746599	1.15539	3.72821	2.77269	1.13746	6	7	6.43499	2.98206	3.3896	5.58485	2.20777	3.14883	4.15205	4.6323	6.5117	-1.34038	1.25823	0.0849346		-0.325884	0.743731
IPO5	-1.3827	-2.12434	0.0628932	2.09624	3.47894	0.780984	1.5348	7	7	8.91191	1.23874	3.61891	3.96221	4.71558	1.49006	5.19771	4.12936	1.4141	2.38759	3.47402	1.7259	1.21518	1.86597	2.59092
RABP1	-1.96121	-2.11652	0.0672393	4.93372	6.89493	2.26604	0.935656	7	7	7.98808	7.62334	7.92168	6.31307	7.08035	7.41508	6.74903	5.16197	3.30627	3.1242	8.25285	3.25292	8.08411	4.57914	3.93654
LAMA4	-1.1388	-2.11549	0.0645827	1.29504	2.43384	1.28071	0.623091	7	7	8.68973	2.06	1.61237	3.40817	1.93926	2.35932	2.86961	2.78812	1.56314	1.82763	1.04468	2.3654	-1.21759	2.62598	0.856047
ATP5J	-0.539485	-2.11522	0.0597471	7.63224	8.17172	0.566143	0.367195	7	7	10.289	8.74652	8.30349	8.27503	7.55676	8.3012	8.04835	7.97072	7.8962	8.16636	7.99905	7.63621	6.44423	7.74673	7.53689
FSTL1	-1.87818	-2.10976	0.0658033	1.22529	3.10346	1.54719	1.48199	5	7	8.52099	3.93406	5.0142	3.6174	4.07572	0.707577	2.51152	1.86378		3.19823	0.424691	2.32407	0.882023	-0.702561
RBM4	-1.69614	-2.10894	0.237132	1.87475	3.57089	1.06979	0.722676	2	7	1.27416	4.38247	3.47772	2.63098	4.16014	2.65739	4.19885	3.4887				1.1183	2.63121
PUR4	-1.15523	-2.1072	0.0732161	-0.603298	0.551934	0.484299	1.15509	3	6	6.97761	-0.705852	0.454619	-0.944578	1.61072		1.21168	1.68501			-1.14869	-0.223573			-0.43763
AP3D1	-1.08097	-2.10564	0.0578329	-0.0318691	1.0491	1.05017	0.861368	7	7	11.5577	-0.0188719	0.525342	1.25166	2.70608	0.599431	1.01452	1.26552	-2.28036	-0.207852	0.526992	0.878799	0.0538111	0.359805	0.44572
TIM13	-1.02203	-2.10527	0.132972	5.98707	7.00911	0.771969	0.50913	3	7	2.78293	6.91717	7.31385	5.98941	7.63585	6.98649	7.12273	7.09825		6.53779		6.31873	5.1047
SYYC	-0.968182	-2.10308	0.0638753	-0.309129	0.659053	0.528487	1.04524	5	7	9.28027	0.295637	-1.18838	0.61941	2.24464	0.451275	1.28316	0.907634	0.255248		-0.0469133	-0.99731		-0.729579	-0.0270902
SP16H	-1.15587	-2.10013	0.0658171	1.32415	2.48002	1.13109	0.792374	6	7	8.79446	1.75423	2.43205	1.48398	3.86924	2.99715	2.5519	2.27163		0.576371	-0.266562	1.08439	2.73491	1.37032	2.44547
EIF3D	-1.33025	-2.09393	0.0656031	1.51101	2.84126	1.28875	0.942053	6	7	9.04733	2.09312	2.48919	2.29182	4.72327	2.18705	3.42655	2.67783	1.03663	3.89159	0.511027	0.590038		0.987401	2.04937
GCN1	-0.983667	-2.09261	0.0653466	-0.0210368	0.96263	0.527988	1.07539	5	7	9.16702	-0.803948	0.918294	1.45078	2.23256	-0.0884546	1.86875	1.16043		0.411196		-0.469445	-0.668251	0.100584	0.520732
RT35	-1.29586	-2.09239	0.077128	1.18928	2.48514	0.303975	1.59861	5	7	6.59746	1.90661	0.720374	1.19841	2.3588	1.82151	4.65129	4.73901		1.03566	1.64791	0.823698		1.21011	1.22905
LRRF2	-1.20236	-2.09123	0.0851875	0.0726656	1.27503	0.959489	0.77621	4	6	5.55448	-0.0566131	2.21698	1.21128	1.61759		0.99549	1.66542		1.51126		-0.366366		-0.428513	-0.425717
PRP6	-1.34543	-2.08884	0.0760178	0.274343	1.61977	1.44837	0.675789	6	7	6.84161	1.11756	1.53782	0.616591	2.44716	1.30275	2.39259	1.92394		2.82868	-1.05515	-0.56101	-0.576583	1.08311	-0.072991
IMA3	-0.960558	-2.08881	0.0670078	1.03328	1.99384	0.510721	1.08443	6	7	8.7999	0.727717	1.56374	1.14158	3.73431	1.33519	2.76529	2.68903		0.892013	0.787863	1.54241	0.993385	0.299259	1.68474
MAOM	-0.874689	-2.0881	0.0635568	3.10112	3.97581	0.946311	0.576878	7	7	9.91832	3.63188	3.4319	3.85256	4.48918	3.24735	4.69249	4.4853	1.70336	4.35289	4.22545	3.11442	2.64662	2.48814	3.17696
STAU1	-0.736414	-2.08785	0.0841109	1.87618	2.6126	0.431695	0.611328	3	6	5.72085	2.48354	2.67601	1.99749	3.65651		2.82718	2.03486		1.8395	2.32505		1.464
GOGA5	-2.09786	-2.08612	0.0934731	1.35516	3.45301	0.687737	2.14089	5	5	4.81685	5.57405	3.52021	3.60196		4.63782		-0.0689815			0.964893	0.514842	2.20435	1.89199	1.1997
CIA30	-1.10653	-2.08477	0.0774889	0.838661	1.94519	0.192313	1.35741	2	7	6.67498	0.461989	1.35194	2.33372	2.08731	0.220844	3.65806	3.50248		0.702675		0.974646
KRR1	-1.26511	-2.08157	0.0801156	3.51666	4.78177	0.435338	1.38649	2	7	6.33178	2.94969	6.008	6.38458	4.02797	3.17079	5.52121	5.41014		3.20883					3.82449
RM53	-0.783197	-2.07516	0.126101	4.86349	5.64669	0.5816	0.455878	3	7	3.11982	5.16432	5.03634	5.38296	5.69811	6.10994	6.08527	6.0499		4.65473		5.52066		4.41509
RT29	-1.45254	-2.07434	0.0717502	0.635348	2.08789	1.11478	1.09953	5	5	7.99848		1.84286	0.784087	1.37701		3.31106	3.12443	1.79102	1.12973	0.416222	-1.15695			0.99672
ZMYNB	-2.40531	-2.06849	0.119299	3.45296	5.85827	1.13038	1.88852	2	5	3.41521	7.52166	4.72967	5.91773		7.80227	3.32002					2.65366		4.25226
ATX2L	-1.59155	-2.06649	0.174142	-0.365364	1.22618	0.907556	1.12664	2	7	2.00955	2.34815	1.13677	-0.75945	2.16874	0.25927	1.9444	1.48539			0.276375	-1.0071
T10B	-0.811273	-2.06506	0.0810717	1.39015	2.20142	0.114649	1.01703	2	7	6.46882	4.31855	1.66141	2.55736	1.91548	2.11266	1.45118	1.39331		1.30908			1.47122
AGK	-1.33252	-2.06433	0.0708664	3.1214	4.45393	0.721165	1.5481	7	7	8.48696	3.16723	3.76809	5.8994	2.28731	4.00063	5.63191	6.42292	3.33952	2.38403	2.88563	4.34631	2.58988	3.73908	2.56539
THIK	-1.43128	-2.05215	0.070562	3.47717	4.90845	1.61746	0.750686	7	5	8.94431		5.67415	5.46741	5.13947		3.91615	4.3451	4.68153	5.70564	4.59544	3.74216	2.20798	1.53243	1.87505
IF2B	-1.65906	-2.04902	0.0650896	0.702866	2.36193	1.34693	1.57243	6	7	10.998	2.30809	3.59275	1.96372	4.57472	-0.433471	2.72695	1.80074		-0.307712	-0.123816	0.739817	-0.193485	0.841738	3.26066
TTC17	-0.680731	-2.04569	0.19765	0.577669	1.2584	0.408695	0.404097	2	6	1.72139	0.879541	1.04951	0.976351	1.18517		1.95323	1.5066				0.288678		0.86666
PERQ2	-1.20279	-2.04469	0.205827	0.415919	1.6187	0.733438	0.680014	2	6	1.62845	2.20889	1.57773	2.57369	0.675054		1.30295	1.37391			0.934538	-0.102701
LETM1	-1.11699	-2.04288	0.0731833	3.20227	4.31926	0.614709	1.30953	7	7	8.52174	5.05326	3.52247	4.80159	1.81766	4.14016	5.31504	5.58466	2.55428	2.89948	2.70494	4.19961	3.19653	2.97811	3.88294
VDAC2	-0.884729	-2.04264	0.0775316	6.95125	7.83598	1.07793	0.388946	7	7	7.5363	7.89452	7.61275	7.98663	7.39106	7.38595	8.19528	8.38566	7.57202	6.60626	7.31547	7.8236	4.68857	7.03283	7.61999
STAG2	-1.63622	-2.04126	0.117299	-0.59727	1.03895	1.17594	1.04375	3	6	3.65886		0.0100443	1.08038	1.98596	-0.472761	1.81736	1.81271				-1.86302		0.461336	-0.390123
GRP78	-0.377151	-2.03902	0.0706426	8.32476	8.70191	0.237324	0.42798	7	7	9.37117	8.63437	8.87484	8.81757	8.97162	7.76625	8.87971	8.96901	7.84643	8.54765	8.29546	8.54181	8.26614	8.38178	8.39404
DX39B	-1.27844	-2.03805	0.0645815	2.43918	3.71762	1.24545	1.09693	7	7	11.8116	2.09975	3.83702	2.72739	4.99034	3.18112	4.88024	4.30748	2.6418	3.77194	3.49767	2.37525	3.27508	0.725534	0.786978
GP107	-1.19983	-2.03762	0.133235	1.35091	2.55074	0.91321	0.642239	3	6	3.03721		2.93373	2.67533	1.4861	2.07589	3.00047	3.13293				0.873437		2.40388	0.775426
SNUT1	-1.01643	-2.03466	0.0754327	-0.595841	0.420585	0.692445	0.952783	4	7	8.20238	1.05264	1.77791	-0.327484	0.291551	-0.57945	1.26511	-0.536182		-0.875569		-1.44076		-0.116839	0.0498062
TOM22	-0.908754	-2.03421	0.0797481	4.94943	5.85818	0.371436	1.12207	7	7	7.29934	4.69921	4.90707	6.33411	5.8565	4.75023	7.02005	7.44009	4.24951	4.88187	5.22035	5.26494	4.76413	4.96089	5.30428
SAC1	-1.18399	-2.03027	0.0652102	2.33742	3.52141	1.05241	1.12829	7	7	11.9423	3.36371	3.13177	5.32053	1.94846	2.65539	3.73046	4.49956	0.55261	1.65134	3.09337	3.50632	3.31351	2.06704	2.17778
PFKAM	-1.78267	-2.02905	0.0715222	-1.04201	0.740665	1.74228	1.36448	6	7	9.46022	-1.80372	0.739009	0.208007	2.26889	0.375276	1.93197	1.46522	-1.08553		2.34581	-2.69628	-1.58912	-1.68194	-1.54498
MINP1	-1.19961	-2.02852	0.0829403	1.35958	2.55919	1.51027	0.345518	7	5	6.8563		2.27415	2.22799	3.0305		2.46742	2.7959	0.478241	1.58059	0.603576	2.62612	4.0324	0.520818	-0.324698
ACOX1	-1.50259	-2.02626	0.0721758	2.08664	3.58923	1.71677	0.949776	7	7	9.35823	2.21058	3.96199	4.31177	4.12118	2.31107	4.5535	3.65451	5.58292	2.27391	2.11078	1.14944	0.0162054	1.65265	1.82054
IF5	-1.38492	-2.02586	0.0715998	-0.232687	1.15223	0.855416	1.55488	6	7	9.55566	-0.709147	1.41878	0.679966	3.72796	-0.541104	2.26594	1.22323	-0.526509		0.585327	-0.744162	1.08993	-0.919257	-0.881456
VAPA	-0.942675	-2.02042	0.0736427	3.27855	4.22122	1.0907	0.578109	7	7	9.12462	4.4255	3.10506	4.70287	4.02465	3.97128	4.64811	4.6711	1.73814	3.43307	4.47129	4.69774	2.79103	2.27923	3.53935
NOC2L	-1.48037	-2.01922	0.158315	0.368	1.84837	0.819159	1.18907	2	7	2.42026	0.600403	2.80071	0.145635	2.03372	3.38056	1.39793	2.57963				-0.211233			0.947233
VAMP7	-1.29532	-2.01368	0.0720786	0.909156	2.20448	0.84597	1.37643	5	7	9.87957	1.39431	1.41253	2.89468	2.29935	-0.0109784	3.50595	3.93548		0.726504	0.267799	2.38494	0.465729		0.700812
CCD58	-1.17811	-2.01312	0.103061	1.48721	2.66531	0.789644	0.970775	3	7	4.76383	1.92573	4.1676	2.47119	3.94585	2.04103	2.18182	1.92396				2.30469	1.42821	0.728716
MYOF	-0.345879	-2.01252	0.0675305	7.04118	7.38706	0.341065	0.300722	7	7	11.8147	7.43903	7.16302	7.74225	6.9918	7.12918	7.74527	7.49887	6.72369	7.30288	6.92097	7.52142	6.72586	7.35012	6.74333
PCBP2	-0.823906	-2.00668	0.0685846	4.09063	4.91454	0.697277	0.832975	7	7	11.6396	4.65666	5.23241	4.27499	5.74907	3.45051	5.43026	5.60788	4.14716	4.69352	4.69664	4.11655	4.0321	2.63184	4.31663
NUP43	-0.796033	-2.00541	0.129192	1.52291	2.31894	0.772315	0.205493	4	5	3.3414		2.46334	2.51949	2.41525		2.07367	2.12296		2.19792	2.01922	1.38526	0.48923
CNOT1	-1.27405	-2.00502	0.0733235	-0.182773	1.09128	1.02135	1.17451	6	6	9.81093		1.37573	0.554908	1.80577	-0.992201	2.32815	1.47531		1.12039	0.195972	-0.688146	0.256137	-0.0901579	-1.89083
CRYAA	-0.878332	-2.00246	0.0878877	7.40924	8.28758	1.13318	0.250286	7	7	6.58401	8.17633	8.65967	8.41077	8.30871	8.34427	8.2797	7.83357	7.97754	5.35851	8.62879	6.92949	8.56179	7.35649	7.0521
PLCE	-1.36331	-2.00216	0.192424	0.535241	1.89855	0.819209	0.946944	2	7	1.86399	1.86529	1.45083	1.68244	0.333494	1.89225	2.79868	3.26686				1.11451		-0.044027
AKAP2	-1.3862	-2.00022	0.0708424	0.25545	1.64165	1.17549	1.32285	6	7	10.9724	1.11045	1.57264	0.109879	3.67399	2.80995	2.05601	0.158659	-1.31055	-0.989511	1.79232	0.667598		0.645796	0.727049
DNJA1	-1.4899	-2.00015	0.0725642	2.68466	4.17456	1.65327	1.07275	7	7	10.2916	3.87843	4.80966	5.12179	5.16182	2.09353	4.38862	3.76805	1.93669	4.74621	3.91078	0.845522	4.16196	2.63267	0.558773
FMR1	-1.10954	-1.99702	0.160585	0.378839	1.48838	0.91497	0.421648	3	6	2.4363	1.68777		1.14834	1.21553	2.01177	0.998037	1.86882				1.3611		0.224663	-0.449248
XRP2	-1.52707	-1.99658	0.0691394	1.23213	2.7592	1.39093	1.46975	7	7	11.9637	4.64493	0.613989	2.91449	2.29907	4.64594	2.35601	1.83996	0.224944	-0.39939	1.56175	3.77285	1.68832	1.56766	0.208801
PRRC1	-0.959166	-1.98907	0.0801301	3.40212	4.36129	1.00964	0.662177	6	7	8.41358	3.49458	4.36311	4.5446	5.03395	3.54295	5.21181	4.338		2.86876	2.90896	5.09431	2.23174	3.97734	3.33161
SSRP1	-1.28681	-1.9875	0.0908547	1.87675	3.16356	1.26638	0.830135	5	7	6.42853	2.39764	2.62917	2.43737	4.77249	3.49785	3.33031	3.08009		3.31582	3.15409		0.580979	1.05632	1.27655
AP2B1	-0.969912	-1.98714	0.0880207	3.94251	4.91242	1.24663	0.336982	7	7	6.87218	4.81485	5.00518	4.37196	5.35055	4.62121	5.19824	5.02499	1.38671	5.22103	4.612	4.6851	3.76145	3.71636	4.21494
F177A	-0.949939	-1.98379	0.104114	3.75252	4.70246	0.634762	0.815433	3	7	4.99638	5.67767	5.35035	4.24869	4.95796	3.24922	5.05965	4.37367	3.41886			4.48453	3.35417
PSDE	-1.25917	-1.98194	0.0803156	1.23563	2.4948	0.723558	1.5172	7	7	8.59501	-0.124688	3.17531	3.01473	4.51985	1.41068	3.37642	2.09127	2.21381	1.61718	1.69362	0.983923	1.50868	0.312472	0.319709
NPL4	-1.61649	-1.9634	0.0745068	-1.09873	0.517767	1.71087	1.34827	7	7	11.3782	-0.814858	0.810288	-0.284814	2.53863	-1.21296	1.5358	1.05228	-1.8146	-1.85451	0.981015	-3.20253	-1.78525	-1.56887	1.55366
RCN3	-1.06533	-1.95648	0.0743944	3.39815	4.46348	0.959215	1.07488	7	7	11.8478	4.46165	4.87532	3.98913	5.33031	2.29089	4.89606	5.40097	2.39222	3.26312	2.38328	3.62729	2.84059	4.56488	4.71565
NDUS7	-0.981412	-1.95465	0.0825639	4.09081	5.07222	0.545223	1.11555	4	7	8.94026	5.55425	5.81428	6.04293	3.45252	3.57946	5.047	6.01509		3.48955	4.08168	4.81068		3.98132
PHB	-0.492405	-1.94017	0.0781207	6.73945	7.23186	0.537249	0.402797	7	7	11.1257	6.71381	6.71035	7.43275	7.18142	7.2379	7.66107	7.68569	6.39989	6.83968	6.38985	7.32534	5.91304	7.39295	6.91541
FA98B	-2.02305	-1.9365	0.0883593	-0.222626	1.80042	0.943197	2.52868	5	7	8.10381	2.16337	1.42349	4.29569	-1.61445	5.6831	-0.298681	0.950451		-0.41699	0.451848	-1.66403	0.770903		-0.254859
STT3A	-0.943223	-1.93516	0.0831865	6.4658	7.40903	1.12046	0.638427	7	7	9.52446	7.70188	7.47964	7.93402	6.0214	7.70966	7.36071	7.65588	6.03536	4.70663	7.49075	7.41809	5.59383	6.31989	7.69608
HNRPR	-0.904888	-1.93038	0.0836007	4.41537	5.32026	1.07413	0.619992	7	7	9.59852	4.40442	5.10834	5.29815	5.03505	6.0978	5.13908	6.15897	2.34677	5.80556	4.76464	4.53903	4.01221	4.38367	5.05571
NDUA6	-1.67321	-1.93035	0.0887856	2.96308	4.63629	1.20185	1.65272	4	7	8.19942	4.97822	2.3494	2.65973	4.12736	6.01021	6.56291	5.76622			2.48463	4.68797		1.92011	2.75962
UHRF2	-0.873032	-1.92937	0.110271	0.55887	1.4319	0.777707	0.566807	4	6	5.11598		2.33973	1.07223	1.16414	1.36002	1.85407	0.801227		1.41595		-0.472202		0.617183	0.674547
OCAD1	-1.68443	-1.92936	0.0857542	2.82087	4.5053	1.77529	1.28788	6	7	9.00186	3.22707	3.95307	4.43768	4.08755	3.49658	5.36446	6.97069	1.34524	1.71563		6.07347	2.16885	3.63399	1.98802
SC24C	-0.680759	-1.92935	0.0907836	1.9656	2.64636	0.33988	0.869465	7	7	7.79186	2.19208	2.94446	3.64284	2.96028	0.944238	3.14586	2.69475	1.7208	1.50213	2.49013	1.73603	1.96271	2.21806	2.12933
PSMD1	-1.13114	-1.92795	0.0793314	1.21191	2.34306	0.952842	1.22543	7	7	11.3131	1.10336	2.40668	2.95047	4.48445	0.802195	2.59156	2.06269	0.120578	2.58396	2.28475	0.649658	0.339455	1.51926	0.985731
CH60	-0.322718	-1.92612	0.0862262	7.64362	7.96633	0.203613	0.393762	7	7	8.99458	7.87708	7.96629	7.84175	8.21031	7.2065	8.37407	8.28834	7.83559	7.77473	7.21794	7.69433	7.71853	7.68235	7.58184
PPOX	-1.58592	-1.92199	0.125868	-0.239398	1.34652	0.127031	1.83777	3	5	4.06344	3.01683		-1.64621		1.06116	2.5916	1.70922				-0.357819		-0.255148	-0.105226
RM38	-1.56497	-1.92176	0.0839073	1.39769	2.96267	1.07266	1.74105	5	7	9.88435	0.470743	1.95334	2.86635	2.75747	2.21591	5.25903	5.21583		2.03803	0.249471	1.81059	2.60687		0.28351
JAM1	-0.891321	-1.91554	0.0816306	5.22868	6.12	0.989475	0.732481	7	7	11.0573	6.18546	5.56039	6.43217	4.82258	7.0993	6.23424	6.50589	4.26077	5.84429	6.04949	6.3107	5.14676	3.5919	5.39685
NCOA5	-1.37711	-1.91452	0.14664	2.9582	4.3353	1.10397	0.88203	3	7	3.16503	4.32271	5.12704	3.11975	3.65662	3.69701	5.49314	4.93084			2.09021	4.2007			2.58368
GBF1	-0.735027	-1.90996	0.0990044	1.02499	1.76001	0.345956	0.863122	5	6	6.79789	0.235687	1.2213	2.14964	2.44566		2.27986	2.22794		1.45733	0.749155	0.645558		1.28962	0.983276
PA2G4	-1.11301	-1.89905	0.0860894	3.46112	4.57413	1.30455	0.838243	7	7	10.2329	3.98777	5.85804	4.8206	5.28669	4.71036	3.79924	3.55621	2.80387	3.57809	3.78774	1.20774	3.36066	3.94643	5.5433
FND3A	-1.37184	-1.89793	0.0842476	0.162601	1.53444	1.20045	1.40566	6	7	10.9988	1.28358	1.27325	3.35039	-0.602244	0.282107	2.33325	2.82073		0.533642	-0.263306	1.91878	-0.23228	0.691105	-1.67233
CSDE1	-1.26739	-1.89633	0.08962	0.457576	1.72496	0.840199	1.55589	7	7	9.22511	0.663579	2.82015	-0.558458	3.9438	1.04151	2.90041	1.26374	0.391679	1.55168	1.46714	0.0218335	-0.88027	0.339057	0.311906
SHLB1	-0.873882	-1.89539	0.0846076	2.6825	3.55638	0.763001	0.899337	6	7	10.9998	4.6972	4.16773	2.41395	4.51234	3.32941	2.81288	2.96116		3.61806	2.65638	2.13151	3.6233	2.0657	2.00005
RM50	-0.911406	-1.88676	0.086119	1.70546	2.61687	0.840253	0.899828	6	7	10.8913	1.42445	2.69341	2.87317	2.80852	1.38531	3.62707	3.50612		1.5513	0.548794	1.5181	1.24739	2.75457	2.61261
GNA11	-0.843311	-1.88619	0.092518	4.745	5.58831	1.05768	0.529704	7	7	8.83168	5.74887	4.87361	6.30859	5.68631	5.05336	6.10822	5.3392	3.59006	5.76343	3.48451	6.27442	4.6575	4.27286	5.17222
HDAC2	-1.01912	-1.88456	0.0900826	3.62219	4.6413	1.06355	0.852863	6	7	9.60036	4.34407	3.61635	4.02639	5.41923	3.97971	5.82261	5.28077		4.59417	2.29354	4.7797	2.61908	4.26141	3.18522
AP1S2	-0.927855	-1.8738	0.125329	2.2846	3.21245	0.428006	0.858212	3	4	4.5664	4.16735	2.52773		2.44792	3.70682					2.50221	1.79151		2.56007
UB2L3	-0.424576	-1.87174	0.112572	2.17738	2.60196	0.0953255	0.530533	2	6	5.74594		1.79168	2.0674	2.95072	3.02551	2.88071	2.89573			2.10997			2.24479
FXRD1	-0.956249	-1.86903	0.115006	1.11037	2.06662	0.379924	1.06656	2	6	5.52683		0.704485	2.14344	1.17256	3.65853	1.96013	2.76058		1.37902		0.841724
COPE	-0.802403	-1.86563	0.0887666	5.19083	5.99324	0.679068	0.913102	7	7	11.0823	4.97389	5.9793	5.94236	6.1734	4.7691	7.34475	6.76985	4.8295	6.42149	5.304	5.25228	4.20279	4.91055	5.41522
VAS1	-0.958343	-1.85893	0.110636	3.3808	4.33914	0.830158	0.808953	4	7	6.22285	5.1413	3.14912	4.57142	3.80881	3.66687	5.29869	4.73778			3.68684	4.16561		2.21775	3.45301
PYGB	-1.02554	-1.85135	0.0950748	1.31691	2.34246	1.08944	0.873658	6	7	9.60056	2.10174	3.62562	1.80322	3.3334	1.61577	2.5832	1.33427	-0.00673155	0.679433	2.54255	0.838324		1.11533	2.73258
RM46	-1.12016	-1.84993	0.123783	2.24839	3.36856	1.27861	0.527065	5	7	4.981	3.58369	2.39322	3.46128	2.98494	4.00459	3.46936	3.68282		1.88758		1.61354	0.792098	2.81132	4.13742
SYAC	-1.63465	-1.84984	0.117877	0.897826	2.53248	2.10847	0.528752	6	7	5.54016	2.19715	1.91633	2.55052	3.3197	3.19121	2.26976	2.28268	-0.665591	0.732363	4.04544		2.89548	-0.704179	-0.916557
BACH	-1.79145	-1.84742	0.114884	2.84198	4.63343	1.93534	0.977783	5	5	5.91711		5.0769	5.60833	4.8392		4.63251	3.01022	2.06925	1.69748	6.2915	2.04351	2.10817
TOM40	-1.18199	-1.84484	0.0996182	4.06207	5.24406	0.842782	1.2769	4	7	8.61805	6.08984	3.76118	4.56021	4.02629	4.91512	6.08706	7.26869	3.70417			5.32415	3.58632		3.63362
GIPC1	-1.07087	-1.84358	0.134178	0.850678	1.92155	0.189897	1.27551	3	5	4.28929		3.42769	0.64877	1.63454		0.822439	3.07431				1.06986		0.735458	0.746719
YLPM1	-1.50281	-1.84348	0.255795	0.613145	2.11596	1.05523	0.86872	2	7	1.41593	2.88751	1.73536	1.67082	0.611166	2.04962	2.93566	2.92159				1.3593		-0.133012
LRC8A	-1.48892	-1.84162	0.0962252	0.952706	2.44163	1.08524	1.84331	7	7	9.71328	-0.787218	2.69996	4.61378	1.68069	1.37252	3.76235	3.74934	0.706962	1.2202	0.995589	2.87131	0.481165	1.16811	-0.774391
BASI	-0.407149	-1.83931	0.0921295	7.01497	7.42212	0.46063	0.36169	7	7	11.3608	7.61228	7.7362	7.59527	7.17	6.71147	7.63837	7.49127	7.29828	6.10368	6.70833	7.08095	7.22457	7.38241	7.30659
EZRI	-1.25093	-1.83099	0.0920724	1.72673	2.97766	1.3036	1.25219	7	7	11.9806	1.40123	2.62169	2.65001	5.17324	3.06971	3.92804	1.99972	3.24234	3.0452	-0.411286	1.58471	1.44319	2.44369	0.73927
CLPP	-1.19965	-1.8282	0.112752	2.61502	3.81467	0.814093	1.26516	6	5	6.60727		3.46247	3.05791	2.9817		3.53536	6.03592		2.28242	2.28061	2.7335	2.20821	1.98468	4.20071
LBR	-1.27798	-1.82204	0.096131	2.55978	3.83776	1.07793	1.44503	6	7	10.8379	2.86933	2.28976	3.32004	2.43185	5.39779	4.84822	5.70731	2.61965	2.59697	4.42633	2.73519		1.45715	1.52338
VAMP8	-1.3582	-1.82038	0.10616	4.14137	5.49956	1.59221	0.969072	6	7	8.00658	6.56718	4.82324	6.04155	4.25315	6.79826	4.91243	5.10113		4.76474	6.99273	4.19394	3.00237	2.89894	2.99548
SCPDL	-1.0745	-1.81917	0.0939325	3.02643	4.10093	1.12113	1.08866	7	7	11.9896	4.27715	3.21342	3.63935	2.32511	5.19315	4.95998	5.09833	3.57279	2.75284	1.38636	3.73968	1.70832	4.39171	3.63328
PIGU	-1.1813	-1.81866	0.100555	3.18614	4.36744	1.24686	0.988316	6	6	9.50465	5.44287	4.11189	5.55713		4.4678	3.23961	3.38532	5.15964	2.73988		1.61088	4.08231	2.62925	2.89486
TCPA	-0.592084	-1.81796	0.0992887	4.4517	5.04378	0.449701	0.735031	7	7	9.93977	4.23734	5.10977	4.70629	6.5405	4.57308	5.1402	4.99927	4.72264	4.3423	4.81445	4.53244	4.28547	4.89031	3.57426
SYMC	-1.53604	-1.81607	0.0945159	0.893035	2.42907	1.52985	1.63316	7	7	11.9491	-0.960113	3.21486	2.87945	3.85916	1.6802	3.22562	3.10432	-1.38534	2.66423	1.13841	0.467383	-0.406058	0.934373	2.83824
STX5	-0.954118	-1.81052	0.123487	1.49317	2.44729	0.382349	1.10802	2	6	5.6227	2.6049		2.65048	2.30512	1.12396	1.64118	4.35809		1.76353		1.22281
AGRL2	-0.499643	-1.80842	0.144674	0.597087	1.09673	0.0121685	0.617496	2	5	4.00776		0.859669	0.276176	1.23534		1.97707	1.1354	0.605692	0.588483
PARP1	-0.991214	-1.80448	0.102971	0.579945	1.57116	0.881623	1.01194	5	7	9.47615	-0.205399	0.850291	1.75059	3.05465	1.80313	1.87617	1.86868		1.50656	-0.402703	-0.240151		1.35599	0.680027
SYFA	-0.846331	-1.80404	0.145333	0.33298	1.17931	0.0260367	1.0482	2	5	4.01231		0.396915	0.445725	2.94512		0.836078	1.27272						0.314569	0.351391
SYPL1	-0.818843	-1.80019	0.107159	2.97809	3.79694	0.482074	1.08498	6	7	8.53857	2.73045	5.16537	4.22358	3.30478	2.18903	4.70963	4.2557	2.94029	2.94499		3.91024	2.8555	2.57177	2.64579
CTL1	-1.49983	-1.79961	0.117453	3.11498	4.61481	0.966727	1.63753	3	7	6.61084	6.94234	4.06076	4.05802	2.91213	6.92797	3.44088	3.9616	2.99744		4.1351	2.2124
DYLT1	-2.06859	-1.79861	0.112393	3.1713	5.23989	2.12766	1.70925	5	7	7.4784	6.34916	6.72507	4.31195	6.02658	6.88009	4.07212	2.31429	2.67596	6.81606		1.20352		2.51818	2.64279
RAB34	-1.03787	-1.79396	0.104578	1.21411	2.25198	0.923852	1.07146	5	7	9.52001	3.16919	1.76875	4.03131	0.981813	1.37447	2.58102	1.85729	1.37871	0.605169	2.74196	0.454664		0.890025
RHOB	-1.04328	-1.79253	0.108297	3.28113	4.32441	0.582433	1.37705	5	7	8.57496	4.69358	3.14181	4.05489	1.94233	5.45394	5.27685	5.70744		2.77052	2.71846	4.13616		3.50137	3.27914
ERGI1	-0.862833	-1.78938	0.105865	6.04939	6.91223	1.11588	0.618392	7	7	9.36768	7.07224	7.21255	7.42473	5.60335	7.34912	6.80314	6.92045	4.68587	5.79106	6.95787	7.11363	4.57602	5.98357	7.23772
GL8D1	-1.12291	-1.78639	0.129099	1.07405	2.19696	0.198697	1.50078	2	6	5.46414	3.64118	0.136111	1.88995	1.30735		2.00834	4.19885		0.933549	1.21455
EDEM3	-0.80316	-1.78425	0.108286	0.529333	1.33249	0.638673	0.852216	5	6	8.93668		1.51589	1.81392	1.2416	-0.326649	1.96482	1.78537		0.304817	0.524871	-0.41246		1.04816	1.18127
EXD2	-0.566313	-1.7837	0.117971	1.17414	1.74045	0.39457	0.556241	4	5	6.94886		1.19093	2.01307	1.10085		2.07175	2.32566			1.15723	0.622047		1.45195	1.46532
TBRG4	-1.22521	-1.77975	0.187153	0.908628	2.13383	0.744318	0.992249	2	5	2.59874		1.2096	1.51962	1.5193		3.28599	3.13466				0.382316	1.43494
NDUA9	-1.03866	-1.7755	0.102269	3.81848	4.85714	0.972874	1.20377	7	7	11.4941	4.73741	3.42246	4.64182	3.55552	4.80516	6.43728	6.40037	2.16268	3.8723	3.43591	4.64586	3.35862	4.08638	5.16762
AP2M1	-1.12388	-1.77236	0.114337	3.37582	4.4997	1.5508	0.6401	7	7	7.98672	4.74586	4.91053	3.45835	5.04219	3.74407	5.02296	4.57394	0.716098	5.10012	3.85005	5.1006	3.35078	2.30089	3.21223
AKP8L	-0.960932	-1.77097	0.144094	0.677958	1.63889	0.745071	0.810091	3	6	4.44224		2.20687	2.17465	2.16961	1.29242	0.146237	1.84355				-0.182289		1.1187	1.09746
DDX17	-0.710845	-1.76901	0.123608	5.18564	5.89649	1.04234	0.209295	7	7	6.48303	5.87862	6.17913	5.87911	5.89192	5.48844	5.94632	6.01189	3.76268	5.87672	5.68506	6.03118	5.8398	5.50629	3.59777
SYF1	-0.828022	-1.76822	0.152457	1.30434	2.13236	0.664663	0.600113	3	5	3.96112		1.72684	1.88192	1.54832		2.9798	2.52492		2.06589				0.841035	1.00609
SEC20	-1.33325	-1.76776	0.112889	3.44287	4.77612	0.704837	1.76418	4	7	8.49457	6.25369	5.81654	6.19344	1.64869	5.99571	3.95745	3.56732	2.91934		3.23045	3.13989	4.4818
ERF3A	-1.27609	-1.76368	0.150684	2.27162	3.5477	0.166705	1.6071	4	5	4.10733		2.67091	3.03773	6.40119		3.01957	2.60912	2.4741	2.13631	2.34245	2.1336
IMB1	-0.81996	-1.7535	0.115117	4.32828	5.14824	0.529854	1.11798	7	7	8.56593	3.51445	4.9612	5.40547	6.55672	3.88301	6.11881	5.59802	4.82884	4.45348	4.89658	4.52203	3.34719	4.04587	4.20399
AFG32	-1.73637	-1.7518	0.105976	-0.270442	1.46592	2.00016	1.69604	7	7	11.6877	2.27282	0.833852	3.6196	-1.86358	1.54995	1.75513	2.0937	-0.396892	-1.71597	-0.788079	3.69366	-2.37277	0.700952	-1.014
G3BP2	-1.56222	-1.75173	0.108002	1.58556	3.14778	1.36973	1.92124	7	7	10.8471	2.15516	5.22376	0.705596	4.72965	0.943965	5.02329	3.25302	2.78755	3.32357	0.0451433	0.206509	1.64115	0.427025	2.66795
IDH3A	-1.12916	-1.74806	0.129191	3.9199	5.04907	1.4927	0.566787	6	7	6.23283	4.63314	3.9763	5.41796	5.54425	5.01238	5.34533	5.41411		5.58755	1.60175	5.34082	4.31111	3.60295	3.07525
TMM43	-0.976725	-1.74408	0.108865	3.9079	4.88462	1.19162	0.88058	7	7	11.0478	4.24632	4.5401	5.42188	4.17624	3.90183	5.74416	6.16183	3.68421	3.04226	5.14363	4.79969	1.73321	4.36895	4.58333
TMX2	-0.953511	-1.73873	0.117131	3.60708	4.56059	0.939543	0.932372	5	7	8.72763	5.14174	4.75022	5.64358	3.17765	3.36905	4.72425	5.11761	3.16371	3.15541	5.28548	3.15838	3.2724
CREL1	-1.64871	-1.73312	0.108676	1.39457	3.04327	1.79457	1.76472	7	7	11.9966	4.0908	1.56132	3.30847	0.958944	6.23335	2.14959	3.00043	0.751357	-0.409198	3.28056	4.14872	-0.727908	1.41383	1.30461
PDCD5	-0.635098	-1.73035	0.144127	2.90635	3.54145	0.231155	0.734839	2	5	4.99991		3.6597	4.48237	3.95716		2.81287	2.79514		3.0698		2.7429
CN166	-1.23522	-1.72869	0.110012	1.33533	2.57055	1.43004	1.23651	7	7	11.7549	1.40288	2.81093	1.77688	3.67222	0.814439	3.80125	3.71528	0.725829	3.17571	0.585736	2.2021	-1.18327	2.21222	1.62899
DYHC1	-0.786282	-1.72407	0.113705	2.81614	3.60242	0.996534	0.680338	7	7	10.5949	2.67978	3.6584	4.13229	4.52297	2.81414	3.98065	3.42872	1.46796	4.26364	3.74919	2.80499	1.81096	2.5214	3.09483
PGAM1	-0.895854	-1.71906	0.121555	5.29958	6.19544	1.24746	0.58727	7	7	8.53502	6.413	6.89821	5.44253	6.96111	6.11825	5.80435	5.73062	5.50551	2.67916	6.14774	5.49422	5.77167	5.02721	6.47158
NAMPT	-1.19929	-1.71095	0.19326	0.179911	1.3792	1.11571	0.677038	3	6	2.76675		0.605517	1.57989	2.43963	1.02366	0.869736	1.75679			1.45924	-0.591255			-0.328251
LAMC1	-1.10437	-1.70385	0.132947	3.25356	4.35793	1.65507	0.448922	7	7	6.87811	4.87173	4.38221	4.63239	4.70331	4.4214	3.74359	3.75085	4.19967	3.65622	2.68869	3.64699	0.264453	5.63056	2.68834
NHP2	-0.399062	-1.70134	0.130269	2.30957	2.70863	0.145536	0.579394	3	7	7.41459	2.08416	3.27645	2.67932	3.20885	1.81943	2.67474	3.21744				2.14659	2.35554		2.42656
TBA1C	-1.54328	-1.70088	0.136707	5.74316	7.28643	1.38076	1.31652	4	5	6.40833		4.96811	7.55644	7.75512		8.17135	7.98116		4.19779		5.85175		7.53098	5.39211
TXD12	-1.17424	-1.69773	0.118894	4.95354	6.12777	1.51718	1.02315	7	7	10.5221	7.13608	6.58321	6.7028	6.69122	4.22524	5.25622	6.29964	3.29167	5.13945	6.38536	5.30151	3.42724	7.2628	3.86674
ACVL1	-0.670978	-1.69559	0.23736	1.83704	2.50802	0.471702	0.521591	2	6	1.91755	2.79214	2.01366	2.16606	2.01436		3.28355	2.77836		1.5035		2.17059
TIM8B	-0.989606	-1.68747	0.148864	4.8306	5.82021	0.746655	0.973909	3	6	5.31232	5.98109	6.43098		7.05798	6.03083	5.09931	4.32106		4.86975		4.06515		5.55692
ARMX3	-1.19554	-1.67466	0.138285	1.80186	2.99741	0.422985	1.71505	2	7	6.93952	3.62218	0.425953	2.80066	1.07957	3.39025	4.6803	4.98295			2.10096	1.50277
IF2A	-0.935339	-1.66346	0.124437	3.40817	4.34351	1.20065	0.8784	7	7	10.9926	3.5278	5.18704	3.8432	5.74431	4.7166	3.52844	3.85719	1.29346	3.41722	4.74508	2.49991	3.37666	4.49103	4.03385
FLII	-1.06506	-1.66285	0.128138	1.32085	2.38591	0.823331	1.44252	6	7	9.73923	0.711124	2.73552	2.41811	4.81409	0.564797	2.49508	2.96264	1.29974	1.83471	0.0417626	1.58526		0.780964	2.38265
UBE4A	-0.723393	-1.66239	0.165179	0.754117	1.47751	0.599418	0.646172	3	6	4.40457	0.618449	0.915866	1.2389	2.04542		2.19529	1.85114		1.32621		0.130681	0.805457
ERF1	-2.14748	-1.6595	0.164383	0.107744	2.25522	2.32181	1.51266	4	7	4.49941	-0.417751	3.67233	2.47241	4.07403	2.67763	2.05345	1.25447			3.21883	-1.7835	-1.54445		0.540096
CUL2	-0.4892	-1.65859	0.165404	0.59942	1.08862	0.118829	0.641439	3	5	4.44161		0.684529	0.777362	2.20993		1.03706	0.734216					0.671544	0.462269	0.664446
STIP1	-1.1952	-1.65541	0.123749	1.77706	2.97226	1.36389	1.33744	7	7	11.9954	2.04473	3.82095	3.80764	5.1341	2.79124	1.57977	1.62737	0.445821	-0.169152	3.30501	1.00554	2.20105	3.20828	2.44287
TRIO	-0.545277	-1.64541	0.138788	0.381018	0.926295	0.427946	0.619855	4	6	7.94052	-0.182724	1.21912	0.848655	1.15192		1.66367	0.857133			0.977937	0.395139		0.0197363	0.131261
FUBP1	-1.01224	-1.6447	0.129733	1.59333	2.60557	1.13657	1.06978	6	7	10.4536	2.27759	3.63747	2.21197	3.17573	4.02651	1.97781	0.931928		-0.189441	2.41195	2.39692	0.53261	2.42064	1.9873
SC24D	-1.10015	-1.64457	0.155562	1.20024	2.30038	1.11987	0.89658	4	6	5.50824		2.49678	2.72024	3.67804	1.09139	1.64642	2.16942		2.59211	0.791076			-0.0575178	1.47528
MK01	-1.06527	-1.64095	0.151236	2.67912	3.74438	1.29272	0.781321	5	7	6.08364	3.21841	4.1859	3.59387	5.18543	2.91077	3.9629	3.15341	1.84777		4.07561	2.08733	4.05122	1.33365
RRBP1	-1.09495	-1.64035	0.150019	5.90254	6.99749	1.74755	0.255119	7	7	6.25563	7.47646	7.18538	6.97498	6.72839	6.90889	6.89859	6.80975	2.10481	7.40695	5.90261	6.95118	6.35999	6.19879	6.39343
NUFP2	-0.674388	-1.637	0.157845	1.2754	1.94978	0.518454	0.693331	3	6	5.437	1.06624	2.40636		2.3289	1.38309	2.87379	1.64032			1.28047	0.754422		1.79129
PRAF2	-0.744894	-1.62941	0.152866	4.73452	5.47942	0.126339	1.20024	5	7	6.18535	4.92761	5.58846	5.56458	3.66879	7.69623	5.20405	5.7062	4.63079	4.66048	4.74424		4.94776		4.68934
RM28	-1.07306	-1.62429	0.141174	1.79975	2.87281	0.601392	1.55631	4	7	8.39849	3.39928	1.25945	3.8846	0.275927	3.33591	3.19272	4.76176		2.17285		1.35862		2.44569	1.22184
MAGT1	-1.11724	-1.61925	0.141321	4.78773	5.90497	0.789621	1.64589	7	7	8.62301	7.38514	5.90707	7.33363	3.21505	7.55127	5.37886	4.56373	4.31385	5.58542	4.25902	5.90442	4.13805	3.98691	5.32643
GALT2	-1.53043	-1.61923	0.145799	1.78393	3.31436	2.05028	1.16146	6	7	7.64682	2.45564	2.2055	3.55711	2.43014	2.95782	4.17998	5.4143	-0.099365	-1.03594	1.90011	4.14846		2.04498	3.74533
RL30	-0.514489	-1.61907	0.133101	7.10807	7.62255	0.512039	0.66682	7	7	11.2503	7.86614	8.22222	7.87456	7.95411	6.18688	7.71162	7.54235	6.65958	7.72431	6.90723	6.64966	6.65702	7.36243	7.79624
SOAT1	-1.00819	-1.61626	0.180082	2.15063	3.15882	0.573795	1.16055	2	6	4.07227	1.49485	2.93503	4.51757	2.52183		4.44318	3.04047			1.7449			2.55637
TMED5	-0.838972	-1.61539	0.139933	5.68093	6.5199	1.2101	0.651009	7	7	9.20461	6.52881	6.41099	7.0413	5.2511	7.20464	6.31215	6.8903	4.67186	3.89383	6.14411	6.61294	4.92511	6.21441	7.30423
PRS7	-0.833398	-1.61179	0.132984	2.74113	3.57453	0.963183	0.971479	7	7	11.9991	3.04152	4.30574	3.88997	5.24204	2.67786	3.34143	2.52314	2.7396	3.4733	4.17525	1.03891	2.56706	2.6421	2.5517
ZFPL1	-0.925339	-1.60927	0.204056	2.78989	3.71523	0.597293	1.03236	2	7	3.0636	3.13126	2.51715	4.1719	3.0686	3.19275	4.4114	5.51353		3.21224		2.36754
NDUB9	-0.427721	-1.60695	0.147169	6.39581	6.82353	0.652929	0.263833	7	7	7.90844	6.81922	6.4641	6.74292	6.56628	6.89286	7.0652	7.21411	6.24494	6.26538	6.72186	7.09917	5.10592	6.89748	6.4359
HNRH1	-0.792162	-1.60381	0.141893	4.8952	5.68737	1.143	0.633471	7	7	9.36812	5.27488	5.90971	4.60548	6.10324	5.34201	6.33072	6.24552	2.34739	5.46874	5.48499	5.35935	5.20874	4.90473	5.49248
CLCC1	-1.00244	-1.60288	0.175683	2.05749	3.05993	0.543552	1.20846	2	6	4.54325	4.55059	3.06852	2.35479		4.49667	1.82218	2.06683			2.44184	1.67315
GNA13	-0.899589	-1.59857	0.142931	3.07467	3.97426	1.30031	0.725238	7	7	9.40358	4.46705	3.98999	4.77184	3.17011	2.97718	4.72839	3.71527	3.84903	0.55634	2.38752	4.49334	3.33437	3.87977	3.02234
RU2A	-1.05482	-1.59824	0.141761	2.23329	3.28811	0.843229	1.43306	5	7	9.77969	0.252305	3.8966	2.71136	4.26321	3.83638	3.86208	4.19482		1.85992	2.63348	3.22222		2.45022	1.00059
ILF2	-0.974723	-1.59612	0.137058	0.916462	1.89118	1.05032	1.22774	7	7	11.7191	0.30519	3.33234	1.51555	2.91918	0.29781	2.18357	2.68467	-0.384014	0.531601	0.703505	1.1776	-0.119696	2.15512	2.35112
OLA1	-1.16081	-1.58764	0.175681	0.543265	1.70408	1.55977	0.579739	5	7	4.79723	1.74092	2.36837	0.83889	2.52639	1.54096	1.45671	1.4563		-0.619798	3.01727	-0.919186	0.386829	0.851208
PEX3	-0.932357	-1.58468	0.187981	0.69241	1.62477	0.0339288	1.31451	2	5	4.01329		0.528884	3.50486		0.722805	0.860376	2.50691						0.668419	0.716401
NEUA	-0.381857	-1.58309	0.169766	1.78025	2.16211	0.0718542	0.577586	2	6	5.41669	1.48558	2.30217		3.06728	1.65561	2.00151	2.46052		1.83106	1.72945
CAP1	-0.710746	-1.58186	0.142654	4.63199	5.34274	0.681761	0.973834	7	7	10.7422	5.40431	6.09055	5.21618	6.71745	5.74723	4.22756	3.99589	5.4064	3.77586	4.99927	3.90522	5.15457	5.09956	4.08306
AIMP1	-1.42657	-1.57643	0.143779	2.5182	3.94477	1.6054	1.6509	6	7	10.7868	1.87386	4.13264	5.14238	6.1228	1.62266	4.59891	4.12011		5.17056	2.54166	0.399065	3.21737	1.6868	2.09373
ANO10	-1.00451	-1.56987	0.179822	1.91536	2.91987	1.12708	0.801878	4	7	4.78627	2.4277	2.90253	3.6514	2.1012	1.9108	3.94942	3.49606			0.824129	2.83993	2.93447	1.0629
SC11A	-1.00156	-1.56831	0.15112	5.60523	6.60679	1.29629	0.945759	6	7	9.03591	7.08473	7.06056	7.14841	4.56815	7.27964	6.44235	6.6637	3.36445	5.71089	6.45241	6.4686		4.86453	6.7705
EIF3A	-1.28844	-1.56525	0.147324	2.38993	3.67836	1.81387	1.20538	7	7	10.4345	2.54552	5.03231	4.0766	5.32189	2.16076	3.58908	3.02239	-0.456262	4.79728	3.03588	1.54111	0.879692	3.70105	3.23071
U5S1	-0.801667	-1.56304	0.147269	3.72775	4.52941	1.11781	0.769356	7	7	10.6428	3.55716	3.95458	4.49148	5.1847	3.83302	5.47998	5.20497	1.58325	4.89264	3.25465	4.26473	3.32615	4.38416	4.38864
G3P	-0.579453	-1.5611	0.145623	6.48054	7.05999	0.616361	0.764551	7	7	11.483	6.13049	7.16431	7.18856	8.06032	5.93537	7.55257	7.38831	6.97946	6.75544	5.79961	6.6051	5.42871	7.00096	6.79448
ROA2	-0.455446	-1.5598	0.151671	7.33091	7.78636	0.673657	0.378144	7	7	9.4396	7.25632	7.90066	7.48369	8.09627	7.48662	8.00696	8.27399	5.8466	7.83953	7.4135	7.54608	7.3835	7.57437	7.71281
DNJB4	-0.938329	-1.5581	0.158454	2.71237	3.6507	0.861939	1.11292	4	7	7.86819	3.51065	4.66245	2.25695	5.23547	2.50755	3.13225	4.24955		3.76487	2.00885	2.00626	3.06949
PVRL2	-0.946817	-1.55599	0.179248	4.32755	5.27436	1.27621	0.558288	5	7	5.10469	4.51568	4.6109	6.05645	5.2129	5.29225	5.56681	5.66556		6.2117	3.72654	4.9664	3.78395		2.94916
ATX2	-0.405901	-1.55552	0.163782	1.34726	1.75317	0.244173	0.537871	3	6	6.9987	1.56296	1.60861	2.22966	2.58255		1.30621	1.229	1.36287	1.09566	1.58326
BAG2	-0.970307	-1.55218	0.158287	2.43957	3.40988	0.661299	1.51596	7	7	8.2037	2.40144	3.61782	5.47427	2.11064	5.50297	2.75568	2.00633	3.67818	1.80149	2.21375	3.00101	2.07999	2.25346	2.04914
RM39	-1.1199	-1.55209	0.159857	2.73285	3.85275	0.662704	1.76974	6	7	7.87093	1.97382	3.30671	3.28211	4.93326	1.63997	5.75225	6.08113	2.25815	3.62317	2.01886	3.25731		2.19117	3.04846
PNPH	-1.64435	-1.54642	0.154714	0.561248	2.2056	1.31506	2.42837	6	7	9.47686	-1.64712	3.11186	4.44741	5.32492	0.199953	2.65488	1.34726	-0.0104849		-1.75294	1.37072	0.985475	2.00562	0.769103
CERS2	-0.913552	-1.54495	0.173477	2.95884	3.87239	0.322439	1.37477	3	6	5.97976	2.20815	2.49582	4.47069	3.41328		5.26515	5.38128				3.32936		2.80528	2.74188
LRC8C	-1.02502	-1.54364	0.170567	2.6189	3.64392	1.05739	1.06298	4	7	6.39846	2.99347	2.88187	4.55244	3.41832	2.11552	4.85699	4.68884		1.25618		3.77554		2.98476	2.45913
MCTP1	-0.566715	-1.54225	0.190781	5.8932	6.45992	0.33194	0.748029	2	7	4.44684	6.10856	6.09554	6.13793	6.59424	6.30798	5.89228	8.08289			5.65849		6.12792
PIMT	-0.889524	-1.54071	0.156574	2.62625	3.51577	1.33798	0.736958	7	7	9.33371	3.90099	3.44102	2.88762	3.66885	4.35157	4.11903	2.24134	0.928535	2.20222	5.08477	2.01335	3.62023	2.18521	2.34942
CLIC4	-1.06363	-1.54032	0.165929	3.26983	4.33346	1.29363	0.997427	5	7	7.24713	3.19307	5.01644	4.05204	6.00033	3.29007	4.74413	4.03811		1.17434	2.86147	3.94292		4.12502	4.24539
H2AY	-0.655344	-1.53506	0.154778	5.24828	5.90362	0.945204	0.618378	7	7	10.3409	5.58904	5.77622	6.35015	5.2066	5.22124	6.79495	6.38716	3.79027	6.2937	4.56286	5.73812	4.52187	5.99864	5.83248
PA24A	-1.08328	-1.53282	0.163477	1.12752	2.2108	0.682422	1.71839	6	7	8.08271	-0.111824	5.0296	2.69162	2.91232	0.314284	2.44866	2.19094		1.74625	1.71764	1.56178	0.327169	1.16066	0.251629
CY1	-1.49328	-1.52667	0.161578	2.39739	3.89068	2.30789	1.17081	7	7	8.8965	2.80649	4.16369	5.41311	2.80902	2.90861	3.67025	5.46357	1.94329	-0.286058	3.52925	6.45172	2.95305	2.34677	-0.156261
SRSF3	-0.363669	-1.5261	0.155775	6.89308	7.25675	0.515398	0.363139	7	7	10.7793	6.91036	7.2127	6.77686	7.27073	7.81922	7.20466	7.60275	5.80532	7.09407	7.34067	6.93712	6.83008	7.2939	6.95044
ODPA	-0.660901	-1.52403	0.153605	4.90234	5.56324	0.775156	0.845881	7	7	11.9097	6.43783	4.75813	5.13598	5.41714	4.49196	5.97139	6.73023	4.60602	5.68195	5.18679	5.96618	4.36544	4.7891	3.72088
RT27	-1.06156	-1.51402	0.161032	1.16451	2.22607	1.01934	1.40948	5	7	9.97856	1.14441	2.253	1.46647	2.50918	0.248963	4.10076	3.85966		2.0992	0.156296	2.32134		1.03576	0.209931
DAD1	-0.465549	-1.51131	0.157447	6.89284	7.35839	0.520595	0.62707	7	7	11.6072	7.83992	6.96161	7.71926	6.16898	7.98533	7.30461	7.52903	6.69873	6.66742	6.28897	7.36929	6.33804	7.31877	7.56867
EIF3H	-0.78957	-1.51124	0.159203	1.67694	2.46651	0.910245	0.971674	6	7	10.8843	2.27589	3.22899	1.46084	3.97096	3.06723	1.54471	1.71692		2.82717	2.10144	0.228627	1.69154	2.12205	1.0908
PRDX4	-0.502317	-1.49764	0.162643	6.82812	7.33044	0.720753	0.517686	7	7	10.8894	6.73711	7.44442	7.89039	7.83547	6.53044	7.36214	7.5131	6.22204	7.48211	7.0887	7.54506	5.57288	7.20565	6.68042
APOD	-0.292236	-1.497	0.255842	7.55614	7.84837	0.325169	0.119666	3	5	2.33055		7.98595	7.74026	7.86864		7.93535	7.71167		7.6791		7.18742	7.8019
NU214	-0.845199	-1.49688	0.16786	0.551929	1.39713	1.13509	0.853549	6	7	9.21698	0.977154	0.589486	1.21432	0.941184	0.828263	2.69391	2.53557	-0.544329	2.67172		0.654762	-0.260292	0.278121	0.511593
AP1M1	-1.16224	-1.49518	0.170421	1.7168	2.87905	1.60889	1.09985	6	7	8.65114	1.38654	2.6987	2.63994	4.03275	1.90161	4.50454	2.98925	2.167	2.20971	0.0120942	3.19134	3.25277		-0.532097
INF2	-0.876834	-1.48709	0.167901	0.695487	1.57232	0.858937	1.18354	5	7	9.97522	2.36246	1.95746	2.28472	2.7296	-0.770699	1.37794	1.06477		1.18004	-0.069087	-0.179095		0.681068	1.86451
NU160	-0.822008	-1.48409	0.171796	1.73631	2.55832	0.92661	0.97233	5	7	9.03886	2.2617	2.15491	3.02463	3.26853	0.64525	3.34107	3.21212		2.3543	0.355944	2.78736		1.57291	1.61102
ROA1	-0.951886	-1.48387	0.189351	3.83867	4.79056	0.448724	1.50589	6	6	5.88098	3.35446	3.46305		6.9819	3.67914	5.46038	5.80442		3.96369	4.01676	3.4781	4.44647	3.95628	3.17073
CAN1	-0.38987	-1.48358	0.164118	4.02533	4.4152	0.459096	0.522149	7	7	11.8066	4.98824	3.73895	3.95694	4.21856	4.14721	4.88822	4.96829	3.81644	4.04611	3.54718	3.95248	4.69038	3.542	4.58275
ESYT1	-0.674367	-1.48262	0.168938	5.81964	6.49401	0.634026	1.02285	7	7	10.0176	5.57766	6.31878	7.17099	6.61808	4.78539	7.4053	7.58186	5.0367	5.93927	5.52473	6.63496	5.08889	6.49861	6.01435
GOLM1	-0.967665	-1.47987	0.169782	0.717015	1.68468	0.952669	1.31237	5	7	9.97498	0.326464	2.31194	3.63894	0.907763	0.13936	1.65053	2.81776		0.290225	-0.15156	2.20015		0.135066	1.11119
ANXA2	-0.343196	-1.47197	0.171878	8.63204	8.97524	0.323137	0.525461	7	7	9.97028	8.82261	8.92741	9.22407	9.25978	7.88121	9.38456	9.32703	8.81158	8.85244	8.82197	8.70208	8.65873	7.92248	8.65501
DCP1A	-0.467469	-1.4709	0.180413	0.633695	1.10116	0.426389	0.577336	4	6	7.81251		0.6314	0.433622	0.777516	1.62414	1.87193	1.26838		1.12686		0.749632		0.101911	0.556381
RAB10	-0.368511	-1.46734	0.169869	6.42181	6.79032	0.400716	0.530034	7	7	11.1698	7.19561	6.81591	6.56979	5.73108	7.34112	6.97299	6.90576	6.30853	5.65382	6.47868	6.90098	6.76162	6.50346	6.34559
SF01	-0.943709	-1.46347	0.194816	2.96059	3.9043	0.497123	1.43032	2	7	5.8605	3.5171	1.07245	4.48715	4.91039	3.66254	5.52701	4.15342		3.31211	2.60907
COPG1	-0.883928	-1.46337	0.169099	2.70686	3.59079	1.15184	1.10782	7	7	11.9818	2.99112	3.88011	4.59578	5.02725	1.64162	3.37514	3.62451	1.89362	5.1448	2.45915	2.22459	2.18536	3.12024	1.92029
CLCN7	-1.9783	-1.46094	0.343111	1.19495	3.17325	1.80254	1.20976	2	7	1.27044	4.70181	3.2111	2.55273	1.87396	4.60573	1.7021	3.56531				-0.0796394			2.46954
MMP2	-1.21395	-1.46008	0.182456	-1.38213	-0.168185	0.694075	1.92739	3	7	7.98665	1.0541	-3.25393	-2.05525	-0.180096	-0.317759	1.65075	1.92489		-0.597869		-1.63129	-1.91723
PSB2	-0.9935	-1.45707	0.228478	1.21437	2.20787	0.461637	1.31057	6	4	3.50244		1.82886		4.05576		1.98118	0.965669	1.05887		1.76994	1.18244	0.643576	1.75463	0.876736
RAB1A	-0.74576	-1.45478	0.172151	5.64731	6.39307	1.03937	0.871341	7	7	11.6453	6.57923	5.21159	6.92283	6.50353	6.65045	5.26698	7.61687	4.24966	4.19875	5.92116	6.64149	5.81478	6.76708	5.93825
SSRA	-0.941711	-1.44416	0.174566	3.98539	4.9271	1.15439	1.28213	7	7	11.8702	3.76019	3.69045	5.50589	4.77505	3.78338	6.01991	6.95483	2.43373	4.04433	4.67899	5.05365	2.44836	3.98843	5.25024
CALX	-0.343148	-1.44263	0.180769	7.29551	7.63866	0.543706	0.316909	7	7	9.65496	7.86612	7.2465	7.70036	7.15531	7.66781	7.87511	7.95939	7.24541	6.12024	7.4956	7.58362	7.32762	7.55503	7.74105
TXTP	-1.79211	-1.44003	0.212997	3.97797	5.77009	2.20429	1.52917	4	7	4.6992	6.59322	6.44743	6.34615	2.47217	6.65072	5.28773	6.59317		1.15464	4.68131	6.42785			3.64809
RANG	-1.0233	-1.43789	0.195301	5.54234	6.56564	1.3704	0.957134	5	7	6.72853	7.38333	6.79769	6.88889	7.02514	7.44138	5.32196	5.1011		4.75291	6.95274	4.12555	7.07506	4.80545
RAB35	-1.29792	-1.43763	0.198041	2.27346	3.57137	2.07668	0.821075	6	7	6.33491	3.91909	2.01149	4.10467	3.0248	3.5612	3.92067	4.45771	0.419257		0.404469	4.66947	0.43464	4.35543	3.35748
ZCHC8	-0.701759	-1.4368	0.24375	0.686898	1.38866	0.501982	0.821802	2	6	3.09142	0.637901	2.51894	2.24182	1.31017		0.551302	1.0718				0.331943		1.04185
MYCBP	-1.2441	-1.43662	0.189861	2.83555	4.07965	1.2504	1.58539	4	7	7.76641	6.04545	1.79373	2.9672	4.225	6.14957	3.95431	3.42232		4.02076	1.71087	1.80053		3.81005
CD032	-1.54815	-1.43507	0.298354	1.27188	2.82003	1.30431	1.48064	2	7	1.83057	1.91806	3.06086	5.45962	1.01826	2.11503	2.23812	3.9303			2.19417	0.349597
GPDM	-0.854495	-1.4338	0.177419	2.95854	3.81303	1.0576	1.16948	7	7	11.8807	3.58043	3.15026	3.33641	2.82583	2.85412	5.26402	5.68016	2.36207	3.57005	3.13687	4.39979	2.45735	1.1714	3.61224
SYMPK	-0.93028	-1.43359	0.193333	0.470352	1.40063	0.846135	1.17878	5	5	7.25724		-0.14233	0.709338	1.43807		2.87657	2.12151		-0.361517		0.403311	0.180114	0.235466	1.89438
HS90B	-0.914724	-1.43355	0.183051	5.93876	6.85348	1.45389	0.858047	7	7	9.72744	6.80449	7.51022	7.12264	7.6795	5.08509	7.10946	6.66299	6.81445	6.83246	7.61776	5.00253	6.91448	3.75492	4.63473
DCXR	-0.476492	-1.4311	0.193879	2.4367	2.91319	0.457228	0.616509	6	5	7.28313	2.25632			2.44287	3.80063	2.87282	3.19332		1.85569	3.16998	2.71895	2.42424	2.20185	2.2495
SPCS2	-0.860353	-1.43096	0.180562	2.11864	2.97899	1.29366	0.925688	7	7	10.868	1.9089	3.93916	4.05462	2.02409	2.15928	3.44038	3.3265	2.11868	0.0522864	3.7258	3.40683	1.9294	2.60142	0.996061
IPYR	-1.05974	-1.43	0.178236	2.12703	3.18677	1.3791	1.3937	7	7	11.9987	1.48554	4.81969	4.0193	4.76526	1.57308	2.68196	2.96253	3.62425	0.794227	3.61756	1.61614	3.40408	1.33425	0.49871
MIC60	-0.83263	-1.42993	0.178289	3.65518	4.48781	1.06847	1.10985	7	7	11.9827	4.55241	3.37127	5.14829	2.69444	4.53095	5.24875	5.86854	2.56532	4.02753	3.74118	5.5375	2.94162	2.57435	4.19875
TPIS	-0.33232	-1.42715	0.181128	6.64653	6.97885	0.367125	0.494742	7	7	11.0703	7.02744	7.19859	7.34424	7.5198	7.17748	6.22356	6.36086	6.88505	6.3236	6.24249	6.82945	6.87516	6.24027	7.12973
PSMD2	-0.85235	-1.42646	0.181545	1.71601	2.56836	0.932061	1.27692	7	7	10.9799	0.90967	3.11701	2.72496	4.98472	1.82834	2.37816	2.03563	1.01556	1.80942	1.84328	1.46598	0.23994	2.71236	2.9255
PCM1	-1.02081	-1.42468	0.209099	-0.253714	0.767091	1.21221	1.01106	4	7	5.43016	-0.189058	1.27182	1.50168	-0.451385	-0.23025	1.53602	1.93081	-1.31857		0.231705	1.23411		-1.1621
COF1	-0.31313	-1.42447	0.184759	7.59633	7.90946	0.494723	0.305777	7	7	10.0004	8.0947	7.33195	8.03271	8.04902	8.2719	7.79126	7.79469	7.70184	7.10931	8.22167	7.30857	8.21502	7.6239	6.99401
MA7D1	-0.714782	-1.4238	0.358771	0.940687	1.65547	0.676597	0.402439	2	7	1.21032	1.92378	1.695	0.884192	2.09516	1.93175	1.49946	1.55893		0.46226	1.41911
HNRH3	-0.490536	-1.41453	0.185131	4.94877	5.43931	0.601925	0.647393	6	7	10.9005	4.04367	5.60299	5.34002	5.64876	5.7307	5.68611	6.02289		5.59709	5.4077	5.46819	4.37228	4.54	4.30736
SRSF1	-0.389561	-1.41369	0.183114	6.59798	6.98755	0.540574	0.489212	7	7	11.8823	6.51882	7.4201	6.14828	7.38041	7.30376	6.90245	7.23898	6.93404	7.46638	6.67645	6.37655	5.6964	6.46583	6.57024
ERLEC	-0.714665	-1.41245	0.196354	3.82694	4.54161	1.24545	0.490859	7	7	7.82008	5.18439	4.19977	4.53869	3.97938	5.20629	4.53825	4.14449	2.17256	4.23886	3.2132	4.64984	5.93775	3.68208	2.89431
PGBM	-0.667754	-1.40686	0.187601	3.78298	4.45073	1.02566	0.724581	7	7	10.7947	3.81579	4.2562	5.28582	4.09791	3.50917	4.80336	5.38688	2.12567	4.75251	4.82037	4.5812	3.15609	3.9602	3.08481
RU17	-0.501786	-1.40486	0.198699	5.18324	5.68503	0.770086	0.448514	6	7	7.78201	5.34946	6.52493	5.27022	5.37424	5.55942	6.00741	5.7095		5.9932	4.85261	5.6834	4.91361	3.92692	5.7297
CALR	-0.194991	-1.40154	0.200162	7.65421	7.8492	0.344357	0.130046	7	7	7.67731	7.88142	7.85822	7.68437	8.00737	7.67716	7.85041	7.98546	7.20332	7.75096	7.88258	7.67767	7.14969	7.89648	8.01876
RAI14	-1.25087	-1.40009	0.194504	1.71584	2.96671	2.08719	1.10953	7	7	9.14028	2.13257	3.47206	1.70919	5.07983	3.22601	2.49509	2.65223	-1.43343	5.37674	1.07709	2.63915	2.15226	0.548366	1.65072
EIF3B	-1.06112	-1.39792	0.188072	1.93999	3.00111	1.30181	1.52924	7	7	11.7018	1.29669	3.77206	2.94463	5.13935	0.787839	4.02918	3.038	-0.272788	3.43872	3.10761	2.25591	2.61709	1.04674	1.38662
DDX46	-0.824154	-1.39242	0.197273	0.50848	1.33263	0.666536	1.29415	4	7	8.98926	0.118728	0.941368	-0.230824	2.80551	0.598894	2.14809	2.94668		0.429418	0.669574	-0.337906		1.27284
VAT1L	-1.45784	-1.39182	0.208315	1.64659	3.10443	2.69158	0.659767	7	7	6.71843	3.06111	3.91348	3.74851	3.52337	2.37261	2.89348	2.21848	2.91968	1.44371	6.20377	-1.25693	3.3376	-0.595112	-0.526589
SCFD2	-0.779035	-1.39082	0.195272	1.36885	2.14789	0.885269	1.04821	6	6	9.72754	0.193176	1.85941	2.25321	2.67303		2.98818	2.92033		1.75576	0.0537082	2.44844	0.618242	1.92413	1.41283
NU133	-0.859497	-1.38973	0.20467	1.95154	2.81104	1.35286	0.736336	6	7	7.46073	2.23918	2.72702	2.73231	3.80535	1.61	3.14268	3.42074		2.60453	1.04805	3.21716	-0.379648	2.55377	2.66539
NDUAA	-1.07859	-1.38851	0.199424	4.83763	5.91622	1.84591	0.903603	7	7	8.71935	6.69677	4.67055	6.13337	4.57334	6.61509	6.33681	6.38764	3.70183	6.32291	3.38092	6.35583	1.82518	5.96149	6.31527
PHF5A	-0.531907	-1.38701	0.197003	6.32394	6.85585	0.873201	0.478368	7	6	9.53456	7.29657	5.94599		7.06606	7.13383	6.83127	6.86135	5.81258	7.89549	5.67649	7.1305	5.93381	6.28213	5.53657
DBNL	-0.77754	-1.38674	0.190948	3.07455	3.85209	0.999837	1.09589	7	7	11.9004	5.65427	4.17692	3.76479	4.7338	3.09342	3.04743	2.49399	2.08021	4.96124	3.38695	2.61627	2.32626	3.61498	2.53594
TCPZ	-0.449141	-1.38441	0.194129	5.10275	5.55189	0.700225	0.496443	7	7	10.8152	5.21374	5.81517	5.491	6.55643	5.31819	5.34838	5.12034	3.57246	5.53295	5.11143	5.10495	5.43877	5.57522	5.38346
RAB8B	-1.00335	-1.38196	0.208562	3.88767	4.89102	1.60964	0.816773	6	7	7.1599	5.53508	5.47254	5.28366	3.99605	5.82575	3.90973	4.2143		1.67956	5.3407	4.05975	2.13857	4.77133	5.33607
TSPOA	-0.509543	-1.38059	0.200287	6.29638	6.80592	0.411106	0.846709	5	7	9.12337	6.29895	5.8742	7.59288	5.92725	6.50311	7.64198	7.80308	6.56258		5.81257	6.85366	6.08886		6.16423
TOR1A	-0.755632	-1.3755	0.199025	2.00606	2.76169	0.764038	1.13809	5	7	9.99282	0.708329	3.65909	3.8848	2.5662	1.88184	3.49207	3.13949			2.64225	1.83538	0.747583	2.36378	2.44129
KIF23	-0.53256	-1.3749	0.271783	1.32179	1.85435	0.264234	0.616674	3	3	2.71044				1.44707		2.56384	1.55215			1.54782	1.03129		1.38627
MMRN2	-1.11931	-1.3748	0.198089	1.95699	3.0763	1.79725	1.1874	7	7	10.3996	2.1456	3.58678	2.5081	4.62954	1.15848	3.70823	3.79736	0.228844	2.11153	0.395306	4.21752	-0.141104	3.4263	3.46052
PREB	-0.922689	-1.3738	0.206772	0.50848	1.43117	0.636093	1.63877	6	7	7.99812	0.696882	0.966236	4.00044	0.297935	-0.8659	2.26914	2.65346	-0.532519	0.946033	0.218295	1.31672		0.609642	0.492711
TOP1	-0.665596	-1.37363	0.274017	1.43912	2.10471	0.526556	0.820439	2	7	2.65548	1.64935	2.67349	1.87699	3.6446	2.03913	1.70368	1.14575		1.81145			1.06679
SRSF5	-1.41229	-1.37253	0.248146	3.68685	5.09914	1.51489	1.43409	3	7	3.65175	4.95137	5.39992	6.15387	6.40271	4.80712	2.13643	5.84257				2.1967	5.22533		3.63853
TCPQ	-0.643847	-1.36918	0.196063	4.09581	4.73966	0.86229	0.896862	7	7	11.9815	3.99438	5.5641	4.51035	6.39091	4.15744	4.12108	4.43936	4.21166	4.84998	5.26207	3.19159	3.96725	4.3626	2.82554
ITB3	-0.595673	-1.36411	0.226162	6.28469	6.88036	0.55893	0.778368	3	7	5.45101	7.04348	7.00684	7.46186	5.16539	6.93704	7.28452	7.26339		6.66682		6.54405		5.64319
HNRPL	-0.552653	-1.36347	0.200736	4.77611	5.32876	0.61198	0.880637	7	7	10.6992	3.48149	5.73814	5.15678	5.49065	5.36234	5.94667	6.12526	3.43543	4.83587	5.15006	4.8538	5.26886	4.92423	4.96452
MIRO2	-0.759728	-1.36344	0.20326	2.72281	3.48254	0.855159	1.07219	5	7	9.79391	2.96292	3.04627	5.32184	2.10015	3.07973	3.39756	4.46929		1.25005	3.19687	2.89369		2.85426	3.41919
RLBP1	-0.70406	-1.36018	0.207553	6.71897	7.42303	1.22557	0.611148	7	7	8.81023	7.67385	8.01611	6.78638	7.97493	7.36067	7.7341	6.41517	6.14768	7.78418	8.78871	7.06176	6.21923	5.47187	5.55935
ARF4	-0.79615	-1.35798	0.202777	2.69228	3.48843	1.07102	1.03332	6	7	10.5597	2.033	3.82671	3.98128	3.70197	2.02973	4.35216	4.49415	3.92697	1.58365	3.03211	3.56362	2.80247	1.24484
GOGA7	-1.11713	-1.35728	0.222385	1.64047	2.7576	0.242324	2.16411	7	7	6.15043	7.1498	2.3462	1.51282	0.424022	2.31959	3.62742	1.92333	1.9693	1.22526	1.69904	1.46203	1.82857	1.62743	1.67165
LIS1	-1.04031	-1.35695	0.209119	2.49221	3.53252	1.08552	1.58635	7	6	8.65689	2.11729		2.51348	6.42496	3.18213	2.75527	4.20196	3.09075	1.92469	3.22801	1.49311	3.943	0.882204	2.88368
RSF1	-0.521034	-1.35681	0.221102	0.135044	0.656078	0.751318	0.45544	5	6	6.34859		0.394842	0.374065	1.53257	0.546792	0.339049	0.749145		0.421581		1.01253	0.541951	-0.706715	-0.594131
CPSF2	-0.580401	-1.35455	0.204572	1.6237	2.2041	0.616483	0.951379	7	7	10.2835	0.386213	2.29089	1.80984	3.06455	1.94852	2.93814	2.99056	1.63235	2.18014	0.990433	0.754853	1.9183	2.45557	1.43426
TMED4	-0.862299	-1.35437	0.203993	3.4709	4.3332	1.16796	1.11626	6	7	10.5203	4.50946	4.37875	3.79909	2.39152	4.46004	4.65201	6.14151	2.99895		2.89347	4.5527	1.77094	3.66669	4.94263
NDKA	-0.338582	-1.35007	0.21977	6.53168	6.87026	0.479317	0.344412	5	7	6.87134	6.92996	7.14875	6.99634	7.07673	7.11542	6.1972	6.62743		7.065	6.44104	6.00386	6.98905	6.15945
TCPG	-0.703398	-1.34607	0.206807	5.07608	5.77948	1.15173	0.764839	7	7	10.4304	4.85489	6.61888	6.33817	6.5796	5.50473	5.74034	4.81977	4.17766	5.72016	6.75872	3.98503	6.28963	4.44228	4.1591
RPB1	-0.611559	-1.34471	0.211368	0.59463	1.20619	0.758705	0.801211	5	7	9.07272	0.359476	0.979446	0.393324	1.96668	0.607917	2.07038	2.0661		1.56851	-0.351655	0.043766		0.760656	0.951877
STAB1	-1.02698	-1.34161	0.209538	1.32157	2.34855	1.72677	1.05831	7	7	9.95019	2.75144	2.18676	2.3477	1.07034	0.970114	3.35892	3.75457	-1.18315	2.94764	0.683279	3.87015	0.240244	2.01704	0.675806
RT09	-1.53031	-1.34061	0.267177	1.70282	3.23313	1.74589	1.41733	3	7	3.20412	1.8635	2.74781	3.26016	3.31046	1.48182	5.59074	4.37745		3.01142	2.37661	-0.279568
TCPD	-0.575669	-1.33429	0.208568	3.83952	4.41519	0.692176	0.907681	7	7	11.2148	3.0474	5.00153	4.41922	5.94086	3.89904	4.53111	4.06717	4.22135	3.09295	5.15135	3.23716	3.8986	3.67465	3.60058
CNN2	-0.788076	-1.33209	0.221363	2.55599	3.34407	1.28575	0.722021	6	7	7.60523	3.76316	2.89134	2.25463	3.84183	2.66476	3.98683	4.0059		3.35709	3.47929	2.75058	0.668463	3.79931	1.28121
RT31	-1.05082	-1.32582	0.215761	2.17442	3.22524	1.51567	1.21322	6	6	9.54243	2.6381	3.61685	1.44269	2.99576		5.10186	3.55616		3.31993	0.0516023	3.51401	3.63029	1.04085	1.48983
PDLI4	-0.769173	-1.32509	0.214643	3.71595	4.48512	0.806893	1.20296	5	7	9.99236	3.8133	4.46857	4.47051	6.45531	2.52924	4.45092	5.20799	3.07029	4.08653	3.53287	4.92268			2.96737
MTA2	-0.73432	-1.32286	0.216444	2.82164	3.55596	1.27045	0.736823	7	7	9.62613	4.23141	3.81239	3.06399	4.46677	2.29438	3.69616	3.32662	0.145196	4.28197	3.02259	3.31243	3.08367	2.9974	2.90823
MA1A2	-0.160725	-1.32036	0.284241	2.49636	2.65708	0.187678	0.0784434	3	2	2.80086						2.60162	2.71255				2.69254		2.31853	2.47801
SF3B6	-0.55758	-1.31942	0.211649	5.06785	5.62543	0.790599	0.790604	7	7	12	4.73335	5.24491	4.63235	6.272	5.62798	6.21146	6.65599	4.24942	5.87871	5.32498	5.87869	3.78139	5.08377	5.27801
DJB11	-0.719793	-1.31616	0.219434	4.57609	5.29588	1.09066	0.840121	6	7	9.36128	5.16419	5.90008	5.03644	6.22593	3.95241	4.65609	6.13604		5.67826	2.73193	5.47894	4.57743	4.99683	3.99313
DHRS1	-0.718762	-1.31563	0.216584	0.900995	1.61976	0.773452	1.17956	6	7	10.3915	2.24059	1.9497	2.11298	-0.64557	2.64833	0.679644	2.35262	0.912287	0.673573	0.278169	0.0962029		2.24858	1.19716
SGT1	-0.964394	-1.31221	0.286526	2.58832	3.55272	1.16628	0.779168	3	7	2.80412	3.46498	4.12417	2.75558	4.33749	2.70992	4.53774	2.93913				2.72787		3.67855	1.35855
RPAB3	-0.863932	-1.31115	0.262712	2.22108	3.08502	0.95533	0.953738	3	7	3.83994	3.6274	2.635	1.5332	4.54807	3.57781	2.98894	2.6847			2.19264	1.28029		3.19032
STXB1	-1.22922	-1.30721	0.232786	2.03072	3.25994	2.39535	0.67229	7	7	6.93944	3.03725	4.35377	2.87143	3.36062	3.65454	3.35017	2.19183	2.83543	2.43186	6.12818	1.53962	2.85803	-0.76813	-0.809953
ABD12	-0.886203	-1.30572	0.220934	0.674547	1.56075	0.983914	1.36718	5	7	9.98282	1.89933	-0.730004	2.22218	0.430844	1.16215	3.02375	2.91699	-0.0200999		1.26173	0.624053		-0.477327	1.98438
UFSP2	-0.928569	-1.30293	0.225099	2.00272	2.93129	1.20022	1.24041	5	7	8.95623	2.14062	2.80818	3.92448	1.56645	1.5018	4.20718	4.37031		3.41738	1.24146	3.01522		0.54987	1.78967
VASP	-0.708449	-1.30196	0.231565	2.40277	3.11122	1.18901	0.650572	6	7	7.48462	3.05052	3.16388	2.76813	4.50149	2.47918	2.90044	2.9149		4.23526	2.81643	0.617275	2.49994	2.42928	1.81843
SPCS3	-0.278447	-1.29881	0.22762	7.17708	7.45552	0.511175	0.245822	7	7	8.63424	7.68428	7.38035	7.5827	7.11817	7.17948	7.76861	7.47506	7.72085	7.24834	7.55635	7.6544	7.02324	6.55933	6.47702
GTF2I	-0.713913	-1.29604	0.241501	0.335713	1.04963	1.27794	0.467615	6	7	6.14604	0.498239	1.16951	1.31108	1.2335	0.535176	1.80066	0.799219		1.12204	-1.38241	1.65338	-1.11506	1.17426	0.562077
COPB	-0.979311	-1.2957	0.226174	2.84159	3.8209	1.75088	0.966043	7	7	9.34325	2.63862	3.53013	4.62242	4.8278	2.43824	4.32637	4.36271	1.23549	3.81595	2.43487	3.89473	-0.106178	3.76071	4.85555
HEBP1	-0.522955	-1.29503	0.298335	1.54901	2.07196	0.219943	0.645479	2	3	2.5996				2.71406		2.07868	1.42315						1.39348	1.70453
RUXE	-1.30478	-1.29413	0.291763	4.57716	5.88194	1.59657	0.913367	3	5	2.80844		4.70055	5.482	5.85113		7.17835	6.19767		3.81915		3.50079		6.41153
RHOG	-1.07836	-1.29316	0.258895	4.27838	5.35673	1.50017	0.963985	4	7	4.45862	6.70026	4.75851	6.22433	4.01521	5.9138	4.62097	5.26404	2.79926		6.37006	3.95014			3.99404
CF120	-2.43446	-1.29217	0.418914	3.59808	6.03254	2.66282	0.144141	2	5	1.00235		5.88632	5.93618	5.98767		6.10875	6.24377				1.71519		5.48098
PFKAP	-0.955452	-1.29209	0.220961	2.53581	3.49126	1.45979	1.30255	7	7	11.8474	2.16296	4.19672	4.85271	4.65763	1.33285	3.53765	3.69831	3.21893	4.23856	3.41235	1.19291	-0.00420651	2.52661	3.16551
CDC27	-0.387118	-1.28995	0.265216	1.34383	1.73094	0.213351	0.547315	3	4	4.08713			1.66168	2.40061		1.79487	1.06662				1.56015		1.13358	1.33775
CHP1	-0.78997	-1.28984	0.226207	2.94775	3.73772	0.892262	1.22928	5	7	9.97508	2.2913	3.71061	6.0458	2.68995	4.08119	4.13219	3.21304	1.71772	4.10358	3.43376	2.82731		2.6564
G6PD	-0.932934	-1.27935	0.228359	1.49989	2.43282	1.07417	1.60267	7	7	10.4855	-0.600694	1.94143	2.95523	4.75538	2.48206	2.97078	2.52558	-0.510781	0.91688	2.17133	1.96393	1.82073	1.31873	2.8184
FAF2	-1.07544	-1.27929	0.227127	3.47803	4.55346	1.37532	1.65532	6	7	10.9968	3.13819	4.6455	4.94884	3.92536	2.13271	6.3063	6.77735	2.20552	2.88594	2.08085	5.63753		3.66545	4.39287
OFUT2	-0.603475	-1.2789	0.288094	1.13168	1.73515	0.725628	0.485538	3	5	3.10679		0.95032	1.70083	1.97833		1.79861	2.24768		0.672561	1.96823				0.754244
AR6P4	-0.857754	-1.27261	0.305562	4.29539	5.15314	0.738422	1.12766	2	7	2.5853	6.34122	5.9842	4.16407	4.58827	6.66249	4.12966	4.20208		4.81753		3.77324
ERP29	-0.539325	-1.27236	0.2371	6.46537	7.00469	1.01765	0.471262	7	7	8.46025	6.90712	7.50942	7.44043	7.30439	6.143	6.80681	6.92166	6.84118	6.9883	6.89099	5.64553	7.60055	6.72086	4.57016
LDHB	-0.428553	-1.27167	0.237804	7.04332	7.47187	0.812903	0.36629	7	7	8.33997	7.42881	7.91548	7.69577	7.86772	7.04481	7.31874	7.03175	7.6438	7.05592	7.90422	5.97528	7.84673	6.02299	6.85429
SNRPA	-0.807423	-1.27149	0.265405	2.78816	3.59558	1.13796	0.690707	4	6	4.49202		3.72465	2.42236	4.50499	3.34207	3.67652	3.90287		1.60055		2.05472		3.9624	3.53495
COX5B	-0.404693	-1.27084	0.227898	6.23406	6.63875	0.6063	0.585019	7	7	11.9847	6.0466	6.61069	6.72394	6.88692	5.75186	6.94473	7.50651	5.57907	7.087	5.92866	6.9486	5.94469	6.46955	5.68083
MPRD	-0.85078	-1.2696	0.235308	5.48471	6.33549	1.34629	1.0143	6	7	9.22845	7.37698	5.02191	7.36714	5.41168	7.00196	6.74569	5.42308	4.99724		6.33191	7.28323	4.85552	3.43419	6.00618
MOES	-0.877026	-1.26867	0.245416	5.02671	5.90374	1.76045	0.496049	7	7	6.94679	5.43855	6.2482	6.03476	6.76383	5.35009	5.86311	5.62763	1.43164	6.1202	4.25659	6.10023	4.9004	6.11257	6.26536
SAM50	-1.07806	-1.26789	0.231112	0.769994	1.84806	1.45078	1.61408	6	7	10.9584	-0.208383	2.06117	2.82843	0.00358373	1.07559	3.17423	4.00178	0.784744	-0.394067	-0.160528	2.62879		-0.672404	2.43343
SPG21	-0.286187	-1.2666	0.241117	2.52602	2.8122	0.182767	0.528611	3	7	7.95681	3.7797	2.99445	2.83886	2.36754	3.0281	2.41988	2.2569			2.64235	2.62034			2.31536
PNPT1	-0.473478	-1.26221	0.237419	2.10096	2.57443	0.437312	0.846915	5	7	9.35922	2.06482	3.35402	2.12271	2.92534	1.08283	3.30496	3.16637		2.40315	1.81725	2.54359		1.48901	2.25178
PRP4	-0.702987	-1.25813	0.24395	1.66325	2.36623	0.910196	0.855904	5	5	7.96993		1.3868	1.97019	3.52565		2.94679	2.00174	1.24592	2.93669	2.24273	0.669998		1.2209
BUB3	-0.808871	-1.25533	0.245186	3.98691	4.79578	1.38132	0.824785	6	7	7.9075	3.90363	5.18032	3.68675	5.99884	4.78666	5.43788	4.57636		6.37163	4.51802	3.96234	2.57994	3.73949	2.75002
TWF2	-0.495499	-1.25328	0.301972	0.925682	1.42118	0.621894	0.405408	3	6	2.88807		1.135	1.60069	1.60923	1.82198	1.62473	0.735457		1.24897		0.208731		1.31935
CCAR1	-0.593162	-1.25261	0.256002	2.27131	2.86447	1.09932	0.399703	6	7	6.13172	3.11284	2.76568	2.20988	2.4783	3.00971	3.16597	3.30891		3.30881	2.34914	3.58085	0.560869	2.09343	1.73474
ITA3	-1.01427	-1.24567	0.240395	0.766251	1.78052	1.80359	1.17812	7	7	10.3316	-0.702015	1.54804	1.81496	2.33793	2.04395	2.71832	2.70248	-0.635194	1.36116	-0.939551	3.53709	-0.837654	0.187002	2.6909
PSA2	-1.05923	-1.24527	0.258082	1.16945	2.22867	0.850426	1.64729	4	5	6.19273		2.37978	0.832242	4.92974		0.98793	2.01366			2.38095	0.400189	0.869671	1.02697
1C17	-0.607026	-1.2417	0.246269	4.95434	5.56136	0.707931	1.00218	7	6	8.84354	6.10175	4.33487		4.22957	6.02729	6.21391	6.46079	4.26394	4.18408	4.593	4.7919	6.1694	5.27665	5.40139
PIGS	-1.2485	-1.23747	0.316384	1.86339	3.11189	1.63594	0.938412	3	7	2.5867	3.20269	2.19431	3.29695	1.62908	3.22953	3.82131	4.40936		0.237606	1.84327	3.5093
SERPH	-0.4184	-1.23615	0.252154	6.51063	6.92903	0.329972	0.832498	7	7	7.83984	5.7822	7.19421	7.41937	7.59717	5.66796	7.34625	7.49608	6.2989	6.52634	6.77867	6.60818	5.87206	6.67773	6.81255
ZW10	-0.86163	-1.23521	0.245972	-0.190601	0.671029	0.864265	1.53635	5	7	9.6523	-1.2868	1.83854	2.53934	0.0811485	-1.27836	1.76197	1.04137			-1.50504	0.330773	-0.526672	0.0291225	0.718807
SRP09	-0.902651	-1.23459	0.247594	3.812	4.71465	1.06296	1.44134	6	6	9.19723		5.40655	4.04334	4.47598	7.23685	3.12386	4.00134		5.61341	2.78418	3.31036	3.01402	4.47572	3.67433
TCPE	-0.857794	-1.23016	0.244499	2.40688	3.26468	1.49636	1.07914	7	7	10.9123	3.07904	4.02616	1.99838	5.28101	2.54258	2.97048	2.9551	1.36142	2.02901	5.72084	2.41567	1.7159	1.73612	1.86924
GOGB1	-0.94919	-1.22733	0.261064	0.519955	1.46915	1.49138	1.03583	5	7	6.70104	2.2704	0.459683	1.83484	0.0362436	1.18	1.45075	3.05209		-0.561894	-0.470587	3.01821		-0.147552	0.761597
UBP14	-1.02824	-1.22303	0.251021	-0.622868	0.40537	1.94098	1.08646	7	7	9.42373	-2.01209	0.56249	0.975979	0.894285	0.473875	1.01126	0.93179	-1.04543	-1.38529	3.42081	-2.00651	-0.865152	-2.414	-0.0645011
GDIR2	-0.74976	-1.2172	0.251957	2.66392	3.41368	0.796603	1.32948	5	7	9.82438	2.359	4.8744	2.17988	4.28169	5.23293	2.33422	2.63366		3.97545	2.09487	2.26379	2.12149		2.86401
PARP4	-0.559911	-1.21641	0.273035	0.662361	1.22227	1.09713	0.212203	6	4	5.54777		1.42783	1.36726	1.11901		0.974985			2.34785	0.260793	-0.402049	0.676271	-0.417668	1.50897
ECSCR	-0.242391	-1.21501	0.291215	7.68555	7.92794	0.137954	0.348043	2	4	3.99746	8.10017	8.12987			8.07475	7.40697			7.7831		7.588
ERO1A	-0.778579	-1.20897	0.256473	3.3247	4.10328	1.49374	0.819717	7	7	9.31328	3.33446	4.00291	4.68343	5.12472	2.8507	3.94727	4.77948	4.77103	1.18888	3.21277	3.6716	1.50634	5.05763	3.86467
SC61B	-0.810909	-1.20709	0.265739	6.73237	7.54328	0.454973	1.6939	5	7	7.1636	8.73846	8.16965	8.06739	3.87135	8.80085	7.41443	7.74086		6.07278	7.33974	6.69968		6.67642	6.87325
HAX1	-0.364078	-1.20692	0.266715	1.79252	2.1566	0.153576	0.744605	2	7	6.98996	2.35116	2.3995	3.35397	1.64229	2.51988	1.02821	1.80118		1.90112		1.68393
CSTF1	-1.09307	-1.20667	0.275809	1.48494	2.578	1.50403	1.23703	4	6	5.6291	0.429486	2.18476	2.54683	3.8918		3.63225	2.78291		3.56732		1.40719	0.948834	0.0164137
RM02	-1.48114	-1.20488	0.395862	3.33462	4.81576	1.60346	1.16342	2	6	1.37331	4.66581	3.40306	3.93051		4.4908	6.29128	6.11311		4.46844		2.20081
ZNT1	-0.681476	-1.2035	0.256555	1.09632	1.7778	0.778005	1.18196	5	7	9.97906	1.21294	2.94965	3.11036	1.47325	-0.262284	2.51764	1.44304		-0.201807		1.9059	1.23536	1.26106	1.28111
WDR26	-0.553821	-1.20279	0.264792	0.882441	1.43626	0.829934	0.66748	5	6	7.68752		1.54422	1.15091	2.2581	0.373559	1.99349	1.2973	0.201009	1.71698		0.459627	1.84772	0.186868
RHOJ	-0.390427	-1.20202	0.355228	2.92219	3.31262	0.385542	0.432524	2	6	1.94653	2.86336	2.77859	3.87214	3.31843		3.36682	3.67638		2.64957		3.19481
OGT1	-0.775643	-1.20074	0.260689	1.19748	1.97312	0.919011	1.22073	5	6	8.94309	1.70479		1.3188	4.1982	0.569916	2.13684	1.91017		2.35128	0.255489	1.9977		0.631285	0.751622
SSBP	-0.312818	-1.19984	0.271466	7.24777	7.56059	0.673002	0.151258	7	7	6.60462	7.33245	7.60997	7.42965	7.52428	7.80186	7.59517	7.63073	6.81786	7.97188	7.59441	7.7084	5.96003	7.35628	7.32553
STIM1	-0.691166	-1.19964	0.256486	3.16366	3.85482	1.26085	0.85665	7	7	10.5664	4.91939	2.77158	4.38722	2.67938	4.51152	3.85709	3.8576	3.61375	1.4863	4.74318	4.53223	3.32805	1.80248	2.63962
VA0D1	-0.685211	-1.19616	0.255351	4.78048	5.46569	1.15684	0.979167	7	7	11.6811	4.95168	4.50717	5.70317	5.49084	4.34047	6.12329	7.14321	5.47825	5.66641	5.43421	5.85951	2.70918	4.38234	3.93345
ATLA2	-0.610804	-1.19385	0.264785	1.81553	2.42633	1.06673	0.71046	6	7	8.50085	2.755	0.995287	2.80448	2.02403	3.03503	2.86299	2.50751	0.229236	1.31712	1.50973	3.1415		1.84456	2.85101
GOGA4	-0.735365	-1.19191	0.27119	-0.319395	0.41597	0.567588	1.34188	4	6	7.18173	-1.62816	1.05653	-0.889244	1.26308		1.70758	0.986036			-1.1006	-0.195029		0.259026	-0.240977
TRA2A	-0.957206	-1.18674	0.282556	4.00995	4.96715	0.990962	1.39265	3	6	5.68342	4.72532	3.04738	3.99612	5.239		5.74774	7.04735		5.10298		3.75663	3.17023
HS2ST	-0.980221	-1.1837	0.272533	1.31654	2.29676	1.46325	1.13473	5	5	7.5332		2.25734	1.11144	1.23793		3.35064	3.52643		0.137831	1.60357	-0.126482	1.41499		3.55276
AP3M1	-0.830212	-1.18149	0.265593	1.06334	1.89356	1.32159	1.1027	6	6	9.68912		2.38066	1.91286	3.28711	-0.0803297	1.95437	1.90667	0.467716	3.19999	0.143293	0.531053		-0.138413	2.17642
XPO1	-0.678577	-1.17887	0.263446	0.854105	1.53268	0.987527	1.087	6	7	10.9428	-0.0551636	1.81818	1.63389	3.26231	0.456688	2.10409	1.50877	-0.564451	-0.147746	1.89667	1.61877		1.1747	1.14669
IMA4	-0.654525	-1.17754	0.267743	2.19244	2.84696	0.840334	1.07125	6	6	9.4634		2.30248	3.07192	4.40942	1.28105	2.53658	3.48032	1.78378	1.44237	3.09888	1.8242	3.41139	1.59401
PDE12	-0.400004	-1.16726	0.278101	0.102822	0.502826	0.482587	0.595217	5	5	7.67208		0.25334	-0.326654	1.28326		0.570805	0.733378		-0.162035	0.0882358	0.938882		-0.235857	-0.115118
MOT1	-0.62561	-1.16649	0.279526	4.71129	5.3369	0.525431	1.1453	4	6	7.42241	6.77719	5.7302		4.25755	5.59084	3.69444	5.97118				4.23672	5.26491	5.05478	4.28875
CRK	-0.55472	-1.16438	0.351265	1.31011	1.86483	0.178729	0.795599	2	3	2.28804				2.78012		1.47545	1.33892		1.43649		1.18373
SRS10	-1.47848	-1.16087	0.309632	2.5344	4.01287	0.183927	2.8404	4	5	4.04189			-0.387479	3.34562	7.27954	4.62151	5.20516		2.2995		2.49586		2.61012	2.73211
IF16	-0.622193	-1.15978	0.292412	1.98971	2.61191	1.09	0.592699	5	7	5.69854	3.22409	2.77614	1.543	2.53748	2.16186	2.91635	3.12443		2.59829	0.174204	1.8666		2.95992	2.34955
LMF2	-0.999149	-1.15877	0.290345	1.56811	2.56726	1.40504	1.32273	4	7	6.03424	2.90602	1.7962	3.19782	0.765364	1.38893	3.29269	4.62377		1.08306		2.81608	-0.198758		2.57204
TXND5	-0.284678	-1.1577	0.277168	7.4981	7.78278	0.293686	0.580531	7	7	8.88233	8.0631	7.80686	7.61425	8.28065	6.61461	7.76782	8.33217	6.9073	7.60128	7.54378	7.55361	7.52506	7.88678	7.46891
PSMD6	-0.983935	-1.15643	0.272391	0.884648	1.86858	1.75652	1.30345	7	6	10.8245	0.379279	3.68565	1.31861	3.25769		1.46147	1.1088	-0.979439	-0.193348	4.0708	1.27985	-0.809053	1.67928	1.14445
PRS8	-0.849835	-1.15189	0.273034	2.77199	3.62183	1.53554	1.20511	7	7	11.3584	3.74785	4.4194	4.40054	5.38785	2.69153	2.70656	1.99906	2.27234	5.45133	2.83208	1.27309	3.1705	0.849444	3.55518
PSB7	-0.727906	-1.14699	0.28039	0.366755	1.09466	0.714992	1.45035	5	7	9.1829	-0.0869078	1.59821	-0.994961	3.18512	2.42936	1.11033	0.421474		0.0381989	-0.110042	-0.340552		0.942511	1.30366
ACTBL	-0.789135	-1.14424	0.295082	8.58909	9.37823	0.456862	1.59396	4	6	6.15248	9.73456	6.21996	9.50639	10.3245		9.92733	10.5566		8.56589	9.00907	8.82113	7.96028
PA1B2	-0.627936	-1.1438	0.281057	2.46241	3.09034	1.23756	0.642652	7	5	9.38011		2.62579	3.4274	3.82199		3.33817	2.23836	2.10365	1.78819	3.742	0.848187	4.21099	3.05704	1.4868
PABP2	-0.854423	-1.13845	0.306167	3.00684	3.86126	1.29674	0.925898	4	6	5.03674	4.17064	3.41534	2.81021	3.1756		4.22237	5.37342		1.90278		2.19403		3.15047	4.78008
MPRIP	-0.708342	-1.13791	0.291536	1.68209	2.39044	0.805587	1.13514	5	5	7.21394	1.44131			4.02424	2.40129	1.22353	2.86181	1.02933	2.34583		0.61361		2.09162	2.33007
RAB43	-0.682803	-1.13775	0.286711	-0.00894188	0.673861	0.815552	1.16497	4	7	8.37884	0.624269	1.86114	-0.359279	-1.35213	1.51209	1.58258	0.848355		-1.19214	0.533724	0.530179			0.092467
UBXN4	-0.724398	-1.13239	0.279863	2.7782	3.50259	1.26202	1.12778	7	7	11.8514	3.51442	2.77781	3.42013	3.0588	1.85165	4.94095	4.95439	1.81088	2.83045	3.90365	4.61962	0.790087	2.79928	2.6934
ERLN1	-0.656455	-1.13132	0.280024	3.35672	4.01318	1.08668	1.08444	7	7	11.9999	2.7525	3.14749	4.68041	4.13703	2.89592	5.21585	5.26303	1.58225	3.85189	3.88588	4.28054	2.2224	3.20076	4.47333
SRS11	-0.838193	-1.12402	0.294816	0.960546	1.79874	1.02288	1.32931	4	6	7.70106	0.692331	0.722035	1.11658	3.89199		2.99308	1.37641				-0.573074	1.4932	1.42806	1.49399
IMA7	-0.343011	-1.12379	0.321782	2.10853	2.45154	0.558786	0.274799	4	5	4.15647		2.8869	2.45118	2.30014		2.46688	2.15261				1.2935	2.43029	2.20142	2.5089
OXA1L	-0.778497	-1.12356	0.293514	4.54633	5.32483	0.576686	1.66692	4	7	8.06871	4.55803	7.1761	7.56731	2.60784	4.88813	5.09673	5.37968		4.8914	4.0777	5.17881			4.03743
VATB2	-0.396374	-1.12163	0.297074	2.81648	3.21285	0.884007	0.304514	7	7	7.40415	2.93597	3.82599	3.14085	3.30094	3.17282	3.19891	2.91447	2.46247	2.65471	4.63697	2.63943	2.48621	1.7994	3.03614
SCFD1	-0.845415	-1.12055	0.286523	1.1456	1.99101	1.16837	1.61847	7	7	10.918	0.101571	1.73047	3.14065	3.06684	-0.562063	3.15148	3.30815	-1.37049	1.36027	0.993749	1.99339	1.45417	1.53358	2.05451
MOT4	-1.2513	-1.10919	0.370249	2.5386	3.7899	1.88865	0.765206	3	7	2.28753	4.49301	3.38117	3.97825	2.39965	4.49633	3.46366	4.31725	4.44399				2.50467	0.667153
NUP88	-0.837031	-1.10611	0.336989	1.71189	2.54892	1.44385	0.600236	4	7	3.60421	1.65746	2.66239	2.82278	3.14662	1.96994	2.30744	3.2758		2.14566		3.07298		-0.326297	1.95521
ABCF1	-0.796843	-1.10603	0.317986	0.774219	1.57106	0.933653	1.17085	3	6	5.1165	1.49726	0.343828	2.94858	3.03373		0.555042	1.04792			1.79581	-0.0348517		0.561696
IPO7	-0.901659	-1.10552	0.294434	0.870147	1.77181	1.36806	1.54498	7	6	10.1563		-0.0197322	1.12798	4.56208	1.33839	2.21981	1.4023	0.382018	-1.37761	2.13501	0.648959	2.74547	1.39361	0.163573
NACAM	-0.503702	-1.10425	0.291703	6.33769	6.8414	0.92063	0.780348	7	7	11.6863	7.32181	6.91253	7.04694	7.68942	6.43422	7.18399	5.30086	7.03603	6.74277	6.6347	6.82368	4.92785	7.10141	5.09742
PTX3	-0.964265	-1.09602	0.301159	3.3394	4.30367	0.979714	2.01851	5	7	9.12202	1.87516	3.95945	5.2698	7.22027	1.67688	5.74753	4.3766		2.53015	3.4342		2.27809	3.74128	4.7133
STRAP	-0.750791	-1.09521	0.305087	3.80558	4.55637	1.67208	0.702643	7	7	8.05495	4.15547	5.06013	4.39737	5.83213	4.2329	4.5492	3.66742	0.365025	4.44813	5.79657	3.91769	4.13808	3.55552	4.41806
PLS4	-0.619318	-1.09085	0.300935	1.641	2.26032	0.993043	0.973568	6	6	9.99608	2.40073	2.87482	2.70947	0.311248		2.45431	2.81131		1.28378	1.02022	1.26021	1.2999	1.32656	3.65532
5NT3A	-0.771664	-1.08636	0.336945	2.63674	3.4084	0.140859	1.57788	3	5	4.10552	4.85614	3.27979			4.89215	1.08049	2.93343		2.55068	2.79929		2.56024
COX41	-0.354986	-1.08415	0.300199	7.14487	7.49985	0.662515	0.558174	7	7	11.664	7.59246	7.95174	7.55823	6.31883	7.5779	7.49771	8.0021	6.57836	5.96851	7.25382	7.92727	7.33611	7.31646	7.63352
LAMB1	-0.496432	-1.08186	0.305041	3.77228	4.26871	1.03898	0.628036	7	7	9.86821	4.23603	4.792	4.64864	4.61211	3.01746	3.92468	4.65007	3.1814	5.26632	3.53753	4.53826	2.20063	4.46313	3.2187
CSTF2	-0.99435	-1.07943	0.320873	1.90367	2.89802	1.48978	1.43388	4	7	6.15445	1.64107	4.8923	4.42311	1.47676	1.84908	3.81161	2.19221		1.18082	4.13154	1.00997	1.29235
PSD12	-0.664637	-1.07757	0.30369	2.56001	3.22464	1.00017	1.28945	7	7	11.3009	2.91331	4.3978	3.59122	5.1217	1.1911	2.81701	2.54037	2.30271	3.1655	3.09242	1.11034	1.38897	3.04341	3.81669
ACLY	-0.915149	-1.07395	0.311667	1.83077	2.74592	2.02497	0.991195	7	7	8.71907	2.05956	3.56615	2.13065	4.44456	1.55439	2.91599	2.55013	0.825306	0.533393	5.26766	1.74358	3.98118	-0.188291	0.652559
EFGM	-0.882182	-1.07261	0.30855	1.91648	2.79866	1.14968	1.84754	7	7	10.0408	0.375543	4.34838	2.80557	4.254	0.0820278	4.33441	3.39071	2.83813	2.7604	0.127957	3.42068	1.08058	1.57703	1.6106
RS12	-0.286103	-1.07192	0.305165	7.28479	7.5709	0.46702	0.529687	7	7	11.8146	6.6132	7.89366	7.82609	8.19935	7.23424	7.82074	7.409	6.78607	8.07824	6.73555	7.30311	7.48911	7.50821	7.09325
OS9	-0.557045	-1.07118	0.313788	2.07708	2.63413	0.880457	0.832074	5	6	8.43286	2.8952	2.37086	2.1133	1.89517		4.18995	2.34026		1.42688	2.54752	3.4136		1.52522	1.47217
SRPK1	-0.709656	-1.06463	0.338456	1.56837	2.27802	0.429679	1.42723	5	5	4.71918		0.0113402		2.99542	1.85658	3.69695	2.82983		2.21192	1.33384		1.2323	1.25464	1.80913
PDIA1	-0.124177	-1.05592	0.31784	7.89144	8.01562	0.148093	0.27364	7	7	9.23705	7.60534	8.14468	8.15581	8.31175	7.68686	7.97245	8.23241	7.66313	8.01043	7.9847	7.85959	7.71624	8.00514	8.00085
IST1	-1.13671	-1.05408	0.351784	2.33533	3.47204	1.54123	1.49223	3	6	3.96574	5.30042	2.85057	4.38397	2.89174		1.11332	4.29221					2.30209	3.89292	0.810987
M2OM	-0.907735	-1.04971	0.320504	3.32889	4.23663	1.42026	1.5526	5	7	9.25008	3.78526	4.57945	4.52451	1.44487	3.55036	5.46534	6.30658	2.0849		3.46488	5.62939		2.23302	3.23225
ECE1	-0.795014	-1.04865	0.327036	5.39379	6.1888	1.89085	0.66936	7	7	7.48053	5.64203	6.04413	6.76951	5.88497	5.21264	6.7871	6.98125	1.53104	6.08911	5.73281	7.11626	4.63593	5.75358	6.8978
CBR1	-0.374391	-1.04683	0.335438	3.80708	4.18148	0.43765	0.669649	3	7	6.01011	4.66498	2.77689	3.91433	4.47076	4.28368	4.60286	4.55682				4.10045		3.30404	4.01676
PLCC	-0.619847	-1.04651	0.332777	1.99182	2.61167	0.44427	1.34494	4	6	6.48131	2.6681	2.35688	3.62482	0.0892434		3.21141	3.71954			2.05351	1.34571	2.2769	2.29114
DDX24	-0.538139	-1.04353	0.33382	0.870468	1.40861	1.3348	0.213603	7	4	6.52362				1.6602	1.18086	1.50019	1.29318	-0.015142	-0.0928312	-0.0737892	3.2356	-0.245303	1.47525	1.8095
COX5A	-0.166119	-1.04347	0.334879	8.15092	8.31704	0.366118	0.145009	6	7	6.33951	8.09104	8.30388	8.52332	8.25075	8.22773	8.37789	8.44468	7.79783	8.58073	8.48389	8.36264	7.91778	7.76265
BCS1	-0.684018	-1.04135	0.320479	0.71271	1.39673	0.999213	1.36214	6	7	10.7935	0.925541	-0.0642483	0.72138	-0.00389477	2.04723	3.46167	2.68942		-0.298015	0.698774	2.0192	-0.601634	1.19084	1.2671
AGRG3	-0.609739	-1.04033	0.36906	5.57377	6.18351	1.14607	0.174034	4	2	3.26227				6.30657			6.06045			7.21143	4.64046		4.95759	5.48559
EMC3	-0.835765	-1.03932	0.323504	2.06906	2.90482	1.04656	1.73007	5	7	9.84613	1.47519	3.51397	5.67831	1.14361	1.06373	3.7368	3.72214	1.73871		1.30573	1.61569		3.91195	1.77322
PRAF3	-0.218927	-1.03686	0.325719	7.6886	7.90753	0.487805	0.272252	7	7	9.40732	7.96896	7.90384	8.37542	7.51663	7.73837	7.7833	8.06616	7.09083	7.61757	6.98413	8.15495	7.88223	7.87247	8.21802
TNPO1	-0.779007	-1.03349	0.324508	2.48294	3.26195	1.65199	1.11716	7	7	10.5386	1.97401	3.44294	3.52217	4.55008	1.48549	3.82302	4.03595	0.200774	4.43764	2.14213	4.59353	1.48073	1.34824	3.17757
RAN	-0.239095	-1.03308	0.324001	7.07379	7.31289	0.49789	0.356444	7	7	10.8708	7.57901	6.69688	7.01656	7.73412	7.28175	7.36029	7.52163	7.33282	7.29283	7.73869	6.2916	7.3533	6.8865	6.62083
MTA1	-0.474362	-1.03081	0.330012	1.54296	2.01733	0.514423	1.08335	6	7	8.83798	3.82188	1.80455	1.84213	1.7973	0.278212	2.78328	1.79392		1.63143	1.31541	1.64415	0.687161	2.23635	1.74327
PRS4	-0.793063	-1.03035	0.326732	1.22763	2.02069	1.05331	1.689	6	7	10.1681	0.888549	1.49963	2.20995	4.81062	-0.58973	2.89133	2.43448	2.06892	0.620511	2.62208	-0.0300269	0.380323	1.70395
ARRS	-0.502841	-1.02844	0.347367	7.31301	7.81585	1.0077	0.501774	5	7	5.42877	7.92686	8.35676	7.32963	7.9772	8.28682	7.86577	6.96791	8.01794	6.45525	8.7162	6.48974	6.88592
SUN1	-0.85594	-1.02839	0.330913	1.85347	2.70941	1.96383	0.996264	7	7	8.89647	2.72065	2.35311	4.08462	0.941306	3.4806	2.36455	3.02105	2.12215	-0.738712	1.54142	5.04411	0.147349	1.31155	3.54644
SRSF6	-0.955258	-1.02392	0.334467	3.1569	4.11215	1.26526	1.81413	4	7	8.3955	6.79953	2.28797	2.70693	5.47311	4.81518	1.98782	4.71454		1.97427		3.07023		2.65335	4.92974
TERA	-0.226862	-1.02286	0.326769	7.07371	7.30057	0.436205	0.39251	7	7	11.8687	7.33184	7.30864	7.31698	7.57915	6.46618	7.66068	7.44051	6.15142	7.48759	6.96676	7.13233	7.23115	7.28682	7.25988
NOTC1	-0.45691	-1.02083	0.338097	1.17419	1.6311	0.646567	0.818989	4	7	7.76091	1.3593	0.169982	2.01572	2.79752	1.39252	2.12587	1.55678	0.700223	2.12485		1.01373			0.85796
DJC10	-0.579701	-1.02052	0.336542	2.57456	3.15426	1.37616	0.604076	7	7	8.22944	3.9012	2.66006	2.82991	3.06396	2.34188	3.37745	3.90536	0.500967	4.07566	1.36918	3.52375	1.63763	3.35897	3.55575
RS4X	-0.669725	-1.01994	0.330189	6.39534	7.06506	0.995646	1.42367	7	7	10.7362	4.88498	6.15754	7.82883	8.39318	5.79055	8.33435	8.066	7.03552	7.53252	4.83181	6.86563	5.48488	7.11038	5.90663
FAHD1	-0.80548	-1.01778	0.331333	2.35299	3.15847	1.17163	1.66818	6	7	10.6575	2.64588	0.999496	3.11397	3.0772	1.64602	5.00534	5.6214	1.48266	1.36558	1.08052	3.79667		3.24861	3.14392
FUBP2	-0.633445	-1.01585	0.335414	3.40575	4.03919	1.44747	0.791588	7	7	9.29422	4.01109	3.31453	2.75584	4.79152	4.70742	4.78559	3.90838	0.727449	4.11614	3.92788	4.53648	2.05952	4.50998	3.9628
GYS1	-0.595928	-1.01257	0.368302	0.945356	1.54128	0.841265	0.879317	3	7	4.01773	1.36269	1.03908	1.68259	2.86629	0.0541571	2.13887	1.6453	0.11635		1.79837			0.921353
CDKAL	-0.39047	-1.01159	0.344574	0.223901	0.614371	0.566196	0.642717	4	6	7.18624	0.41462	0.274861	0.560671	-0.17925		0.910018	1.7053			-0.281657	-0.250981		0.715487	0.712753
GDIR1	-0.421853	-1.01098	0.339036	5.23254	5.65439	0.857597	0.600636	6	7	8.79301	6.19738	5.50153	4.70946	6.41613	5.22665	6.05282	5.4768	4.42626		5.88204	4.44899	5.76239	4.53599	6.33958
CK5P3	-0.594712	-1.01095	0.334234	1.49371	2.08842	1.2737	0.894498	7	7	10.7604	2.58201	1.75234	0.644686	2.71514	1.28414	2.46763	3.17302	-0.282766	3.18997	1.59379	2.79009	2.01677	0.424021	0.724101
AP2S1	-0.3617	-1.00902	0.337208	4.8866	5.24831	0.813833	0.486999	7	7	9.80865	4.89461	5.07791	4.77351	5.77876	4.72739	5.76861	5.71734	4.01225	5.79146	5.05911	5.44024	4.16764	3.99119	5.74434
CD63	-0.175087	-1.00273	0.335842	7.59214	7.76722	0.317665	0.335429	7	7	11.9646	8.05873	7.84696	7.9319	7.06111	7.99296	7.79199	7.68692	7.24297	7.59788	7.14089	7.89	7.92966	7.49211	7.85144
MCAT	-0.903269	-0.997642	0.36056	2.3956	3.29887	0.28623	2.16166	2	6	5.46424	5.92189	1.46162	1.8318		6.00542	1.39756	3.17492		2.59799	2.1932
GDIB	-0.624264	-0.992009	0.340864	4.22509	4.84935	1.21664	1.1366	7	7	11.9448	3.29515	6.02648	4.7276	6.54309	4.90701	4.5963	3.84985	2.8427	4.02609	6.45063	3.23089	4.20418	5.08879	3.73235
TM9S4	-0.788262	-0.990087	0.342013	3.93776	4.72602	1.58522	1.38712	7	7	11.7923	5.37832	3.10284	4.83347	2.70241	4.88447	5.52902	6.65162	4.81528	2.33486	4.01464	6.40469	3.37273	4.81802	1.8041
STX4	-0.8209	-0.988855	0.350806	2.86084	3.68174	1.75064	1.11737	6	7	8.26202	2.62326	5.6912	3.85144	2.56157	2.87369	3.89805	4.27297	1.35528	0.491365		4.17589	3.3879	2.57941	5.1752
MYDGF	-0.203182	-0.982819	0.34788	7.49739	7.70058	0.30368	0.454918	7	7	10.4615	7.97146	7.71626	7.91352	7.95818	6.70719	7.67439	7.96302	6.99896	7.21892	7.53114	7.42998	7.77178	7.72932	7.80166
AHNK	-0.317743	-0.981402	0.345841	6.67034	6.98808	0.62424	0.586591	7	7	11.9539	6.41698	7.12753	7.32133	7.34107	5.92144	7.48315	7.30506	5.53394	7.12575	6.45183	7.0984	6.3189	6.81139	7.35215
ABCD3	-0.83111	-0.978594	0.350948	1.70651	2.53762	1.246	1.69574	5	7	9.96144	1.21914	2.98715	4.19619	0.644606	0.51484	4.10975	4.09168	3.33219		2.08515	1.56631		-0.13844	1.68736
PLAK	-1.31806	-0.975829	0.379821	1.72794	3.046	2.94992	0.766783	5	7	4.38859	3.66553	3.2053	2.77439	1.65725	2.67815	3.35414	3.98721	6.94624	1.10304		0.246255		0.446192	-0.102034
E41LA	-0.49161	-0.969805	0.385543	3.93338	4.42499	1.12496	0.164298	5	7	4.12218	4.30901	4.61854	4.14521	4.45024	4.60369	4.41408	4.43413	4.31383	4.3631	4.50182		4.55923		1.9289
SEC13	-0.43019	-0.967886	0.352267	5.1985	5.62869	0.855155	0.807184	7	7	11.9602	4.9459	5.20629	5.19246	6.43583	4.67035	6.28528	6.66471	4.08828	5.28789	4.164	6.19918	5.1196	6.2273	5.30323
MPPB	-0.575374	-0.967767	0.371109	2.90784	3.48321	1.19218	0.644451	5	6	5.90515	3.68761	4.24078	2.28531	3.49846		3.61947	3.56765	0.894668	3.16336		3.27796		4.08501	3.11819
STAU2	-0.613014	-0.966129	0.413729	1.73225	2.34527	0.671211	0.842223	2	4	2.64733		1.75992			3.06281	1.48488	3.07345	2.20687					1.25763
GBB4	-0.586386	-0.963272	0.354449	4.53676	5.12315	1.11676	1.16053	7	7	11.9823	3.21866	5.32907	4.91384	6.1517	4.02433	6.38221	5.84221	3.03975	5.19634	4.0159	5.74758	3.16768	5.14467	5.44539
ILVBL	-0.727305	-0.961863	0.361134	1.649	2.3763	1.53435	1.12055	6	7	9.04183	0.494791	2.42814	2.95189	2.13814	1.55203	3.1878	3.88133	3.91551	1.47438	-0.708024	2.01781		0.923849	2.27046
RB33B	-0.682818	-0.95866	0.358534	2.30933	2.99215	1.09919	1.53069	7	7	10.8882	4.20272	4.46407	4.24637	0.98737	3.78011	1.12528	2.13913	1.40584	1.51084	4.12615	3.28481	1.45606	2.81808	1.56355
KAP3	-0.59071	-0.946861	0.36992	2.83984	3.43055	1.25935	0.790177	6	5	8.47565		2.88963	4.75988	3.39982		3.32541	2.778	3.23486	1.93176	5.06895	1.49362		2.4318	2.87804
RT26	-0.990496	-0.945472	0.501562	3.17329	4.16378	1.43286	0.652525	2	6	1.14195	4.84741	3.73954		4.032	3.1469	4.47657	4.74029				2.1601			4.18647
ATLA3	-0.372658	-0.941569	0.374655	4.89095	5.26361	0.974965	0.382044	7	7	7.80015	4.7412	4.93894	5.44484	5.43226	5.08772	5.30129	5.89905	4.69777	4.96881	3.94297	6.37797	3.54508	4.95612	5.74796
PTBP2	-0.836339	-0.940402	0.443198	7.13034	7.96668	1.52626	0.268724	3	5	2.07473		8.34889	7.71049	7.70585		8.03139	8.03679		7.93096	5.37036		8.08971
NDUS2	-0.733122	-0.938227	0.366634	3.46919	4.20231	1.47457	1.44902	7	7	11.9963	2.65961	4.39728	4.19572	3.33879	2.69612	5.72415	6.40451	1.77048	3.13567	3.92444	5.6396	1.57733	3.52287	4.71392
LMAN2	-0.4611	-0.926971	0.372493	5.82442	6.28552	0.987424	0.870073	7	7	11.8129	5.63681	6.00112	7.10848	6.01378	4.94313	7.16744	7.12787	6.10285	3.87957	5.91623	7.21175	5.98687	5.7138	5.95986
MUTA	-0.676856	-0.92457	0.37432	0.207147	0.884003	1.51658	1.2048	7	7	11.4161	0.0850371	2.64651	0.304001	0.865693	-0.975313	1.46583	1.79626	0.7662	0.330592	-1.36839	3.01093	-0.940417	0.69751	-1.04639
UBA1	-0.381677	-0.922977	0.37475	2.31548	2.69715	0.838599	0.702703	7	7	11.6435	2.23473	2.23911	2.16127	4.14839	3.00053	2.61635	2.4797	2.02438	1.74827	4.07794	2.45869	1.57725	1.94469	2.37712
PDIA4	-0.321722	-0.922076	0.387981	6.96688	7.2886	0.893277	0.232867	7	7	6.81175	7.53518	7.0407	7.00704	7.54231	7.27446	7.1395	7.48103	4.95761	7.25177	7.16577	7.23794	7.25612	7.50794	7.39102
CP20A	-0.74267	-0.917104	0.39309	2.34674	3.08941	1.59852	1.00651	5	7	6.25204	3.37448	2.81541	4.22422	2.20305	4.51372	1.79896	2.69603		0.697898	2.02838	4.9697		1.62767	2.41007
UGDH	-0.614909	-0.913945	0.416196	0.819267	1.43418	0.341775	1.25581	2	4	3.71039		0.359786		3.13773		1.60788	0.631304	1.06094		0.577595
2AAA	-0.719082	-0.91254	0.38662	3.85536	4.57444	1.88852	0.883235	7	7	8.50493	4.22031	4.21818	4.71103	5.94848	5.14365	4.68341	3.096	2.25875	6.12618	6.01495	4.59831	4.21173	1.33397	2.4436
GPX4	-0.464274	-0.902824	0.400205	1.87993	2.3442	0.594262	0.938298	3	6	6.22481		3.71166	1.90771	2.83488	1.56533	1.22045	2.82517			2.43987	1.94345		1.25645
PSB5	-0.653041	-0.901901	0.404519	2.18057	2.83361	1.21558	1.0412	4	7	5.55457	3.06558	3.41225	2.1921	4.65948	2.92264	2.10078	1.48246				1.6802	0.866585	3.72416	2.45135
CDC37	-0.851107	-0.900778	0.389322	3.49802	4.34913	2.14666	1.28108	7	7	9.79267	3.71791	5.91047	5.30903	5.72433	3.89585	3.08318	2.80315	2.73354	0.259154	6.58989	2.74861	3.79829	5.82713	2.52955
IMPA3	-0.73278	-0.89607	0.390735	1.11207	1.84485	1.81694	1.17472	7	7	10.27	2.64792	1.84362	1.86468	-0.705988	2.67356	2.16169	2.42844	-1.29725	-1.26156	1.66877	1.9779	0.843564	3.49774	2.3553
ESYT2	-0.579234	-0.895856	0.392242	2.90708	3.48631	1.48155	0.855217	7	7	9.59895	3.19686	4.55725	4.38538	2.39258	2.47889	3.85434	3.53891	2.57426	3.07362	1.10406	5.84798	2.49577	3.26155	1.99232
HG2A	-0.746381	-0.885295	0.457922	6.57763	7.32402	0.950289	1.24725	2	6	2.32484	4.78071	7.77823	7.85318	7.8091		7.93377	7.7891	7.24959			5.90568
HTAI2	-0.617535	-0.883369	0.399678	3.8272	4.44474	1.15965	1.24023	5	7	9.1391	3.62479	3.70666	5.11596	3.7553	3.28558	6.81274	4.81213	5.72512			3.06133	3.65201	3.94126	2.7563
MCP	-0.251839	-0.882789	0.410265	4.46382	4.71566	0.460017	0.446488	4	7	6.20078	4.71941	4.22143	4.8704	4.73822	4.68105	4.23165	5.54747		4.48339	4.16034	5.10681			4.10475
TEBP	-0.492176	-0.873864	0.411513	6.19325	6.68543	1.43612	0.397586	7	7	6.91436	6.71207	7.08661	6.6872	7.19084	6.10908	6.76575	6.24644	7.08219	6.69412	7.32348	5.81034	7.73243	4.98067	3.7295
SCRB2	-0.568311	-0.873836	0.406123	3.77533	4.34364	1.55683	0.732876	7	7	8.53479	4.05723	3.93739	3.51121	3.87253	4.3168	5.27276	5.43758	4.32113	3.61989	3.61164	5.50715	0.553841	4.31045	4.50322
CYBP	-1.07928	-0.871537	0.464956	3.42583	4.50511	2.07129	0.85102	3	7	2.29585	4.6548	4.92192	4.67113	4.94033	4.9906	4.75787	2.59914	1.22797		5.34164		3.70789
KPYM	-0.332721	-0.87091	0.404762	6.11768	6.4504	0.87008	0.514422	7	7	9.73796	5.85984	6.48422	6.44619	7.37101	5.85764	6.49013	6.64374	7.44961	5.85725	7.01334	5.49455	6.11942	5.99446	4.8951
ADRM1	-0.676789	-0.870328	0.494437	2.38759	3.06438	0.973491	0.957087	2	7	1.60816	2.65775	4.25471	1.69877	4.4117	2.83168	2.93531	2.66077			3.07596	1.69923
PRPS1	-0.320639	-0.869948	0.417678	1.17321	1.49385	0.0196004	0.974463	2	7	6.01693	2.50064	1.04114	0.968922	0.959243	2.96921	0.211874	1.80593			1.15935		1.18707
SYWC	-0.803492	-0.861244	0.406211	1.2345	2.03799	1.84482	1.63992	7	7	11.8374	-0.2618	3.77287	2.88773	4.22533	1.03643	0.951851	1.65354	-0.961532	2.09363	4.40289	1.09149	2.26682	-0.254891	0.00309773
TMCC3	-0.900356	-0.85826	0.423608	-0.142304	0.758053	1.28288	1.96554	3	7	6.01803	-0.50515	3.31685	3.67163	-0.380929	0.262308	-1.44867	0.390324				0.946243	-1.55669		0.183533
CREL2	-0.523331	-0.855039	0.434386	2.08957	2.6129	1.08772	0.742824	4	7	4.64705	3.12335	3.62842	2.84033	1.80229	3.10652	1.76277	2.02664		1.16641		3.66544		1.74311	1.78332
RUS1	-0.259809	-0.854199	0.451072	1.92188	2.18169	0.460628	0.330033	3	5	3.26682	1.70164		2.33908		1.98267	2.49145	2.3936			1.60958	2.45089			1.70516
MESD	-0.61331	-0.853146	0.412726	5.05248	5.66579	1.58376	1.0532	7	7	10.4387	6.34077	6.11548	6.04952	6.00285	6.76122	3.86955	4.52112	2.94449	3.06294	6.35021	4.28932	5.99209	6.5338	6.19449
FAK1	-0.445631	-0.850762	0.426067	1.21696	1.66259	0.829416	0.783782	4	6	6.2963	0.96686	0.588205	1.56667	2.58893		2.38184	1.88304	0.975834	0.847861		2.43947		0.604678
MLEC	-0.646893	-0.847553	0.416446	4.48579	5.13268	1.71509	1.06598	7	7	10.0337	5.77638	4.23818	6.08787	3.36438	4.76589	5.3974	6.29866	4.09714	1.62384	6.25573	6.66085	3.33095	4.7614	4.67061
NRM	-0.456068	-0.847361	0.458518	3.17238	3.62845	0.0732787	1.07394	4	4	3.02793			3.2		5.21871	2.85693	3.23816	3.08434			3.16343		3.17861	3.26315
TOP2B	-0.390194	-0.846518	0.438137	0.716814	1.10701	0.987411	0.295554	5	5	4.71104		1.41026	0.722653	1.39873		1.03655	0.966842		2.262	-0.495545	0.621637		0.648932	0.547041
TCPB	-0.302317	-0.845142	0.41553	4.26639	4.5687	0.581827	0.746445	7	7	11.3251	4.29375	4.78477	3.77894	6.10363	4.12224	4.52933	4.36825	3.58209	4.5356	4.87618	4.19323	3.67896	5.07361	3.92504
EWS	-0.337996	-0.84507	0.421594	6.85576	7.19375	0.839504	0.545492	6	7	8.36126	7.03911	6.02759	7.51384	7.43367	7.26749	7.53457	7.54003		7.18779	6.65818	7.39137	7.02722	7.59779	5.2722
TIM44	-0.484409	-0.844614	0.424296	4.00174	4.48615	0.51636	1.42685	7	7	7.54505	2.98708	5.04621	5.41016	4.82999	1.98809	5.78225	5.35929	3.58282	4.44322	3.67396	4.49689	3.2119	4.11075	4.49267
AUP1	-0.66619	-0.843872	0.4211	2.62551	3.2917	1.0052	1.61068	4	7	8.79487	3.34619	3.72027	6.09508	0.650524	3.34217	3.33099	2.55665			3.24279	2.50664	3.497	1.2556
SMCA1	-0.384582	-0.843043	0.434586	1.35219	1.73677	0.339632	0.921015	3	5	5.45788	0.711717	1.05366	2.88078	2.47041		1.56728			1.405	0.989243		1.66232
FA5	-0.340823	-0.843021	0.425442	7.11754	7.45836	1.00941	0.35389	7	7	7.45303	7.91022	6.88713	7.14138	7.35414	7.61393	7.72599	7.57573	7.82462	6.01518	7.73011	7.42191	8.00989	7.44357	5.37748
DC1L2	-0.632322	-0.8428	0.415848	2.89071	3.52303	1.37611	1.43059	7	7	11.982	2.98588	4.39093	4.39137	4.81536	3.90805	3.58951	0.580082	2.20074	5.58739	3.75286	2.35561	1.42604	2.63128	2.28102
SYNE1	-0.463231	-0.842643	0.42492	0.454738	0.917969	0.800099	0.997593	4	7	7.6708	-0.445544	1.23257	1.61575	1.56068	-0.613073	1.51757	1.55784		0.48489		0.647011		-0.620284	1.30734
HSP7C	-0.249928	-0.841797	0.420444	6.8764	7.12633	0.391109	0.681227	7	7	9.56779	6.01644	7.45802	7.59903	7.6289	6.31323	7.67483	7.19384	6.7938	7.26426	7.27179	6.88665	7.08032	6.68741	6.15058
MGST3	-1.23382	-0.833075	0.434106	3.52145	4.75527	2.29897	2.28757	4	6	6.55415	3.41076	2.97007	5.45639	2.03785		7.16443	7.49213		1.82151	2.48834	6.90836			2.8676
TOM70	-0.549304	-0.83224	0.423161	3.59707	4.14638	1.41893	1.01789	7	7	10.8824	3.53985	4.5918	5.77186	2.51928	4.46693	3.7171	4.41783	1.43849	5.15519	4.37361	5.27621	3.49422	2.60998	2.83183
ARP10	-0.323268	-0.831522	0.450293	1.32012	1.64339	0.539236	0.520647	3	5	4.20527		1.03254	2.09591	2.10887		1.83804	1.14158		1.56712		0.701625			1.69161
RM32	-0.782617	-0.83056	0.512765	3.62694	4.40956	1.18486	1.14087	2	7	1.58147	5.97111	4.35359	5.36324	2.4747	3.66355	4.77895	4.26179		4.46476				2.78912
PLXB2	-1.02239	-0.828481	0.458629	0.330071	1.35247	2.35344	0.983695	4	7	3.61091	2.18969	1.13825	2.05462	0.120279	-0.10322	2.04602	2.02163	3.56016		0.0983326	-2.07292		-0.265283
DNJA2	-0.512403	-0.823198	0.432229	3.22518	3.73758	1.47664	0.729155	7	7	8.76177	4.72513	3.69499	2.46176	4.45108	3.58215	3.73837	3.50958	0.542258	4.20905	1.85628	3.53859	3.83432	3.92893	4.66682
SYNC	-0.897439	-0.82315	0.471224	0.872387	1.76983	1.70081	1.16034	3	6	2.97474		2.70412	1.55288	3.43028	0.138379	1.63614	1.15716	-0.987611		2.34833		1.25644
HNRL1	-0.402939	-0.822579	0.438818	2.88995	3.29289	0.941993	0.661337	5	7	6.75419	2.09123	3.26148	2.73113	3.62091	3.7614	3.65372	3.93035		3.7185		4.08834	2.3727	2.23423	2.03599
IDH3B	-0.536409	-0.820318	0.429568	2.03765	2.57406	1.03025	1.32469	6	7	10.9266	0.065614	3.1653	2.42235	3.51001	1.65352	3.72761	3.47399		2.84729	1.66149	2.70425	0.673037	3.21121	1.12862
PEAR1	-0.480893	-0.818278	0.464016	1.10981	1.5907	0.867318	0.753521	3	6	3.58994	2.05293	1.7524	2.27058	1.35466	1.92608		0.187579		0.211157		1.94196			1.17631
TRI27	-0.365363	-0.816818	0.4326	1.41096	1.77632	0.840755	0.758854	6	7	10.2542	1.83302	1.55115	1.89504	1.87746	0.9	3.25386	1.12374	1.73572	1.74676	1.91053	1.07942	-0.146432		2.13977
HM13	-0.878464	-0.809919	0.455577	3.88759	4.76606	1.89799	1.38954	4	7	4.88975	4.91516	3.74555	5.27592	4.65729	2.73327	4.796	7.2392	4.62207	2.46382	2.23186				6.23261
SCAM3	-0.501734	-0.809813	0.450078	5.6756	6.17733	1.4616	0.441291	6	7	5.78246	6.39343	5.77955	7.04656	5.76373	6.10113	6.15434	6.00258		3.8667	5.84991	6.94056	3.98099	6.08462	7.33081
TKT	-0.658942	-0.808697	0.436879	3.27683	3.93577	1.80297	1.18187	7	7	10.3527	2.71533	4.20301	3.13136	6.10348	4.66996	2.98931	3.73794	4.4712	2.979	5.7461	2.69373	4.49382	2.29476	0.259196
SGMR1	-0.512418	-0.807124	0.445919	1.10918	1.62159	0.70213	1.29271	3	7	7.06312	3.68018	-0.199018	1.09	0.488106	1.7083	2.314	2.26958			0.85765	0.567452			1.90242
EIF3L	-0.51119	-0.806337	0.441886	2.47071	2.9819	1.51636	0.71696	7	7	8.55497	2.63069	3.48401	2.27789	4.352	2.87689	2.81486	2.43694	-0.198185	3.32309	3.96462	2.58559	1.01482	3.6173	2.98771
FIS1	-0.396487	-0.805367	0.43801	6.68569	7.08218	0.874129	0.897279	6	7	10.7814	7.13821	6.48774	7.77746	7.53604	5.34465	7.90142	7.38971		7.20013	6.94256	6.70599	4.95426	7.3137	6.99748
DDX23	-0.549819	-0.804609	0.45799	3.18626	3.73607	1.18818	0.827069	4	6	4.94176	3.60177	5.0738	3.09675	4.06004	3.88562	2.69847		4.92389	2.5091		2.96836	2.34368
JAM3	-0.687584	-0.80232	0.447633	2.88237	3.56996	1.2818	1.50527	4	7	7.31877	5.39261	2.66837	3.11742	1.12601	5.36123	3.49361	3.83044	2.24512	2.68477		4.73775		1.86185
CARM1	-0.484684	-0.800453	0.46414	3.74218	4.22686	0.831923	0.903148	3	6	4.43553	5.04518		3.08124	4.83903	5.16515	3.83102	3.39953		4.69454				3.37481	3.15718
YTHD2	-0.744714	-0.799623	0.46098	3.67942	4.42413	0.493458	1.93084	2	5	4.89128		5.12484	1.16117	5.73397		5.84869	4.25198		3.33049				4.02834
GSTM3	-0.901319	-0.798169	0.447985	5.59307	6.49439	2.03504	1.76868	5	7	7.93986	7.62472	7.81509	7.39283	6.86142	7.7966	4.49304	3.47704		5.089	8.22965	2.60282	6.18075	5.86314
GSTO1	-1.08243	-0.797792	0.452852	1.76681	2.84924	2.02165	2.02374	4	5	6.57082		3.99856	4.20171	4.42603		-0.291929	1.91183		-0.665949			3.62317	0.886519	3.22349
TBK1	-0.39579	-0.79699	0.509039	1.16592	1.56171	0.583336	0.618372	2	5	2.00001		2.02942	2.26596	1.42462		1.40522	0.683344			1.5784	0.753442
TMED2	-0.587361	-0.794153	0.450213	6.10762	6.69498	1.81269	0.737068	7	7	7.93123	7.26673	5.72113	5.84478	6.23724	7.1657	7.13792	7.49134	7.1409	4.21703	5.67238	7.27292	3.15059	7.53708	7.76244
NKRF	-0.71673	-0.792836	0.500073	1.00557	1.7223	1.01585	1.34445	2	6	2.3485	0.756512		0.00917673	3.40169	3.21448	1.44504	1.50692		1.72389	0.287259
U2AF1	-0.351737	-0.7905	0.452628	3.954	4.30573	0.400286	1.09497	6	7	7.78958	3.34943	2.44211	4.0158	5.13173	4.61902	5.29726	5.28479		4.67417	3.84626	3.57747	3.60779	3.96931	4.04897
TP53B	-0.575748	-0.790309	0.458064	0.0699321	0.645681	1.67852	0.65428	6	7	6.29813	-0.111083	0.386046	0.206335	1.1825	0.089609	1.22479	1.54157		0.588356	-1.33605	2.65199	-2.14275	0.597739	0.0602996
DYSF	-0.685325	-0.786721	0.448032	1.0185	1.70382	1.36535	1.8568	7	7	11.0206	1.7325	2.46693	3.64629	-1.84638	0.675027	1.93123	3.32116	0.494093	-1.18485	2.9769	0.876305	0.341256	1.32347	2.30229
SEH1	-0.589881	-0.781483	0.450003	3.58525	4.17513	1.51523	1.30092	7	7	11.7314	3.44847	4.70687	4.61192	5.09369	1.50349	4.8094	5.05206	1.7586	6.35029	2.99898	3.81795	2.32358	3.38766	4.45969
SNP29	-0.43557	-0.777984	0.462483	2.46295	2.89852	0.266324	1.42432	3	7	6.8815	2.20247	2.44833	4.70528	2.92687	4.96693	1.25514	1.78465				2.75143	2.41099		2.22644
ADA15	-0.524179	-0.770992	0.468048	1.00534	1.52952	1.32901	0.873414	5	7	6.44009	0.870729	2.63127	2.03914	0.289716	0.818022	2.28133	1.77643		0.40809	-0.0420134	3.24139	0.242405	1.17684
TMED1	-0.448062	-0.770777	0.460644	2.55447	3.00254	0.629583	1.34556	5	7	8.97669	4.93582	1.4531	2.13743	1.5467	3.01251	3.9699	3.9623	2.36863			3.27698	2.36154	1.69973	3.06549
ORN	-0.420091	-0.769166	0.45802	3.02021	3.4403	0.881163	1.08729	6	7	10.981	5.24384	3.08548	3.44317	2.4347	4.29964	3.53362	2.04167	2.71848		4.77952	2.86796	2.84741	2.4249	2.48301
EBP	-0.428053	-0.765832	0.470029	1.9781	2.40615	0.200257	1.43057	2	7	6.66318	2.42531	3.42508	3.62819	0.357153	3.85893	0.560791	2.58761			1.83649		2.1197
MAN1	-0.95883	-0.765372	0.509723	0.455385	1.41422	2.04939	1.089	3	7	2.50113	1.9174	1.64092	2.2083	-0.851251	1.78102	0.952197	2.25093		-1.19674	-0.18582	2.74871
XRCC6	-0.463017	-0.76535	0.460281	2.45711	2.92013	0.937377	1.29741	7	7	10.9227	0.594641	3.14082	2.27633	4.82829	2.72086	3.37951	3.50045	1.36896	2.73942	3.97224	2.24355	1.40054	2.29399	3.18107
TM168	-0.566441	-0.76255	0.511516	1.61666	2.1831	0.777604	0.865079	2	3	2.48507			3.18199			1.68736	1.67994				1.06681			2.16651
EIF3F	-0.414035	-0.760283	0.462992	3.0859	3.49994	1.1582	0.857058	7	7	11.0552	2.61652	4.33902	3.55873	4.89701	2.80313	2.80599	3.47915	1.85128	5.07005	2.68092	2.82051	1.86276	3.97616	3.33963
SRRT	-0.350538	-0.759252	0.466235	0.581192	0.93173	0.56796	1.05629	6	7	9.44125	0.582452	0.93184	-0.578471	2.23643	-0.145512	1.96855	1.52682		0.95379	0.154245	0.345347	0.103932	0.367471	1.56237
STAT1	-0.44334	-0.75783	0.469455	1.03436	1.4777	1.1962	0.720272	6	5	8.32696		0.345021	1.57855	2.0366		1.29117	2.13715	0.722922		2.96091	-0.496827	0.762355	1.8028	0.453989
RBM39	-0.270664	-0.756486	0.46489	2.94875	3.21941	0.5773	0.750218	7	7	11.261	2.11667	3.98798	4.02425	3.4503	2.30423	3.39249	3.25999	2.55537	4.02898	2.91494	2.79948	3.39575	2.43599	2.51075
AATM	-0.369511	-0.750841	0.467324	6.3629	6.73241	0.879824	0.959816	7	7	11.9103	5.29564	7.21026	6.81151	7.413	5.44555	7.42511	7.52583	5.85039	7.707	5.15432	7.30207	6.14111	5.94226	6.44315
CAV1	-0.230012	-0.748292	0.468798	5.93721	6.16722	0.598851	0.550239	7	7	11.915	5.46448	6.3451	6.583	5.84762	5.62421	6.30011	7.006	4.87006	6.1284	6.25906	6.47176	5.42621	5.8982	6.50677
RSSA	-0.420434	-0.747493	0.469177	6.749	7.16943	1.06966	1.03458	7	7	11.9867	5.85032	6.68041	7.73629	8.29994	5.83871	8.01998	7.76041	5.57471	8.07426	5.58776	7.38817	5.74434	7.34457	7.52921
PCAT1	-0.514854	-0.745377	0.473251	1.85145	2.3663	1.16274	1.2291	6	6	9.96935		1.45425	3.80302	0.771533	1.69969	3.51898	2.95032	2.58521	0.676348		3.62708	0.898703	1.06604	2.25529
DUS3	-1.01499	-0.744943	0.53867	0.820917	1.83591	1.63271	1.61795	2	5	1.86783	1.05572			2.55428	4.28919	0.156375	1.12398				-0.333586	1.97542
CRYAB	-0.43402	-0.742924	0.481263	5.67268	6.1067	1.47671	0.456504	7	7	7.1364	6.24444	6.60979	6.01301	6.13311	6.50341	6.03435	5.20881	6.23313	4.11067	8.13429	4.04987	6.76687	5.26175	5.15219
MYPT1	-0.847565	-0.742526	0.489034	-0.139828	0.707737	1.14549	2.36166	7	5	5.35645			-0.327766	4.43592	-0.085837	-1.80787	1.32424	1.03645	-1.07198	0.507101	1.40434	-0.861371	-1.64023	-0.353096
BZW2	-0.366184	-0.741281	0.488488	0.583149	0.949333	0.361537	1.03538	2	6	5.58831		-0.29976	-0.146838	1.12267	2.39618	0.986301	1.63745			0.838794			0.327503
TXNL1	-0.797969	-0.741207	0.491356	0.991994	1.78996	2.2603	0.980125	5	7	5.08546	2.08078	1.417	1.38587	3.01868	2.81784	1.69332	0.116259	-0.492948	-0.550379	3.20641		3.70255		-0.905662
PKN2	-0.411231	-0.740584	0.489308	0.0587885	0.470019	0.421539	1.11603	3	5	5.50581	0.497539	1.57175		-1.3396	0.448733	1.17167				-0.408041		0.411567		0.17284
LAMP1	-0.0941864	-0.740435	0.473309	7.55097	7.64516	0.243752	0.232058	7	7	11.9711	7.98216	7.43601	7.48143	7.34365	7.8393	7.70871	7.72484	7.47853	7.55823	7.24934	7.82997	7.32617	7.5036	7.91096
PURA2	-0.619795	-0.739827	0.478398	1.53626	2.15606	1.30827	1.46872	5	6	8.93219		1.72388	2.43902	4.70127	0.771266	2.54817	0.752728		-0.455947	1.51277	1.35886		3.10214	2.16349
RCN1	-0.347804	-0.739622	0.473771	6.51174	6.85954	0.86287	0.896308	7	7	11.9827	5.41544	6.77746	6.99989	7.73422	5.96468	7.28502	7.84008	6.04229	6.05746	5.45974	7.06533	5.88794	7.80427	7.26513
IR3IP	-0.188281	-0.73719	0.47953	6.83784	7.02612	0.382153	0.515952	7	6	9.12624	7.62032	6.37556	7.25002	6.39768		7.29805	7.2151	6.70496	6.04439	7.0109	7.12649	6.84705	6.9882	7.14292
OFUT1	-0.449815	-0.73516	0.481336	3.68697	4.13678	1.2387	0.843715	6	6	8.81766	4.13278	3.46337	4.9335	5.37893		3.43043	3.4817	1.81026	4.77851	3.9586	2.49394		4.59073	4.48977
HNRPF	-0.429473	-0.734018	0.484149	5.50836	5.93783	1.43572	0.578879	7	7	7.9006	4.83811	6.02091	6.0063	6.54563	5.55663	6.38393	6.2133	2.80106	5.88999	5.20492	5.85448	4.86866	6.95528	6.98413
GNS	-0.448378	-0.73388	0.480181	2.77293	3.22131	0.98676	1.18537	7	6	9.8174	0.965258	3.69587	3.41738	3.43027		3.32595	4.49312	2.12698	3.87345	2.50544	3.50799	1.12782	3.69753	2.57132
VPP2	-0.561404	-0.733093	0.486706	0.969824	1.53123	1.03826	1.42617	6	5	7.19135		1.63731	1.75448	-0.880073		2.35656	2.78787	0.849303	0.0730759	2.51342	1.96718	0.079449		0.336519
UK114	-0.736694	-0.731758	0.483217	3.62926	4.36595	1.70783	1.73534	5	7	8.8621	5.88354	5.88071	2.02563	3.66261	6.26386	2.39373	4.45157	3.12539	2.50941	6.58969	2.46028		3.46152
PGK1	-0.352699	-0.73043	0.479391	4.49452	4.84722	0.961753	0.840919	7	7	11.79	4.47115	5.631	3.54928	6.03948	5.20965	4.63525	4.39476	4.93128	3.10713	5.69492	4.51711	5.4487	4.28754	3.475
RACK1	-0.288964	-0.727946	0.480837	7.25401	7.54297	0.789015	0.69317	7	7	11.8042	7.19687	7.83855	7.8223	8.35297	6.18133	7.83753	7.57128	6.09296	8.1963	7.25872	7.4834	6.27173	7.6529	7.82207
EFR3A	-0.404248	-0.72672	0.483464	1.21885	1.6231	1.22914	0.809462	7	7	10.3805	1.13111	0.899604	1.32893	1.25429	1.16814	2.8731	2.70653	0.0436186	-0.263492	1.48421	1.80794	2.03106	0.314664	3.11398
TMED3	-0.44617	-0.719465	0.498916	4.04919	4.49536	1.44849	0.494198	6	7	5.99778	4.68299	4.39962	4.66056	3.4547	4.84103	4.49592	4.9327	6.24277	3.72026	2.0396	3.43198		5.08629	3.77423
TBB2A	-0.430299	-0.717168	0.503047	4.48778	4.91808	1.44061	0.314205	6	7	5.40856	5.30262	4.6195	4.80551	4.51976	5.34697	4.9205	4.91168	4.77705	2.74831	5.02802	2.84068	5.06157		6.47104
TES	-0.551386	-0.715501	0.494607	-0.482641	0.068745	1.35512	1.16602	5	6	8.0171		-0.0211617	-0.804115	2.02834	-0.873582	-0.764302	0.847291	-0.168839	-1.47289	1.50602	-1.99038		-0.28711
OSBL8	-0.458306	-0.713548	0.491024	1.81918	2.27748	1.40855	0.950654	7	7	10.5268	2.27872	1.36499	3.3594	1.03698	1.6443	3.25014	3.00785	1.5798	-0.22817	2.11112	3.33952	0.15871	2.55311	3.22016
TAM41	-0.584191	-0.71312	0.534833	1.4834	2.06759	0.89436	1.27551	2	6	2.57859	1.22496	-0.0226188	3.00578	1.98091		3.07684	3.13968	2.11581		0.850993
ZMY11	-0.71854	-0.71167	0.530903	2.06207	2.78061	1.05976	1.51304	2	5	2.82585			1.58263	2.63422	5.35801	2.54968	1.7785		1.31271		2.81143
6PGD	-0.606566	-0.706911	0.497486	2.14521	2.75178	2.01486	1.04599	7	7	9.01503	1.59382	3.08747	2.41055	4.54486	2.8085	3.2863	1.53093	0.623561	0.396512	5.59071	1.43174	4.1245	0.516856	2.3326
LSM2	-0.412534	-0.705436	0.495264	1.89559	2.30812	0.998522	1.10935	6	7	10.9565	0.955546	3.58439	1.58553	3.683	1.24079	2.19793	2.90967	1.16599	2.52983	2.63424	0.185587		2.3515	2.50639
QOR	-0.358725	-0.704532	0.498053	3.15367	3.51239	0.79201	1.00888	7	6	9.4745	2.1373	2.64895	3.41723	3.64616		4.66706	4.55766	4.41065	3.17557	3.46505	2.59047	2.85896	3.62833	1.94665
ESTD	-0.435029	-0.7033	0.500021	0.687878	1.12291	0.852649	1.25246	6	6	8.81515	-0.436926	2.49732	0.742121	2.75786		0.331646	0.845429	1.68581	-0.312806		0.352944	1.79602	0.281786	0.323521
WASH7	-0.260892	-0.700485	0.552417	1.17544	1.43633	0.63533	0.129098	3	4	2.12443			1.50703	1.48757		1.50753	1.24319		1.63347	0.450136				1.44271
BGAL	-0.432346	-0.69423	0.503299	4.16978	4.60213	1.37883	0.835149	7	6	10.0303		4.72241	3.37836	5.40277	3.79497	4.9745	5.33975	3.20079	6.0491	3.06657	3.7524	2.47385	5.39172	5.25406
ROA0	-0.286419	-0.692291	0.512429	3.52695	3.81336	0.938032	0.35013	6	5	6.58168		3.96469	3.3113	4.18711		3.60764	3.99608		4.85196	2.02247	3.37153	3.18972	3.77168	3.95431
PSMD9	-0.617517	-0.685664	0.585221	1.97556	2.59308	1.1547	0.849797	2	5	1.46306		3.10286	1.79908	3.10972		3.40001	1.55372		2.79206					1.15906
SYRC	-0.457009	-0.682799	0.508094	2.60977	3.06678	1.13705	1.35758	7	7	11.6417	2.04647	3.77638	3.57373	4.48421	0.508696	3.89791	3.18009	1.4522	4.58723	3.64179	2.34204	2.61485	1.58339	2.04694
CPSF7	-0.207583	-0.679056	0.514902	8.05504	8.26263	0.633424	0.431327	6	7	8.62845	8.53262	8.33063	7.78748	8.50779	8.91348	8.02695	7.73944	8.45626		8.65257	7.76544	8.64361	7.73469	7.0777
API5	-0.640141	-0.677506	0.534255	1.97405	2.61419	2.09751	0.253305	5	5	4.11665		2.91495	2.60903	2.65112		2.68194	2.21392		0.298428	5.59504	1.83355		0.948389	1.19486
HDAC1	-0.48755	-0.677308	0.515908	2.01183	2.49938	1.4271	0.945329	6	5	8.65294		2.35345	1.65864	1.63355		3.86205	2.9892	1.56968	3.46223	0.933146	4.15163		0.963437	0.990835
TXLNA	-0.342803	-0.672277	0.520799	1.94469	2.2875	0.73361	0.937155	4	7	7.80868	2.96489	1.58402	1.26016	3.95898	1.779	2.55049	1.91493	1.94266			1.08632	2.87868		1.87111
MARC2	-0.514184	-0.672153	0.526641	2.34814	2.86233	1.24067	1.09648	4	6	5.96696	3.09143	1.37368	4.35487		1.79347	3.38823	3.17227			2.05217	4.15999		1.8121	1.36831
RM51	-0.367681	-0.670083	0.535342	2.91686	3.28454	0.731753	0.708274	4	3	4.54296				2.4878		3.84276	3.52308		2.44163		2.14617		3.46768	3.61197
FUBP3	-0.349149	-0.670029	0.516683	1.87418	2.22333	0.880642	0.997993	6	7	10.9796	2.12611	3.72059	3.18851	1.51858	0.737857	2.32883	1.94284		2.6333	1.60906	1.78503	2.93412	1.85835	0.425235
NDUA3	-0.375486	-0.668764	0.526263	3.25804	3.63352	0.253191	1.44724	4	7	6.62196	4.74901	2.79806	2.84421	1.21523	4.97126	3.68675	5.17013		3.47192		2.89092		3.33987	3.32945
ARC1A	-0.483807	-0.668159	0.519701	1.23788	1.72169	0.917973	1.63921	6	7	9.64445	-0.207621	2.74031	0.490799	3.95512	-0.104108	2.48329	2.69401	0.509628	1.72605	2.34141	2.09731		0.42191	0.330963
EMC7	-0.484978	-0.665857	0.527855	1.4294	1.91438	0.912675	1.3994	6	5	6.66801		0.131467	2.29746	0.780215		3.25512	3.10765	2.33264	0.913837	0.31263	2.67817		1.43568	0.903471
NUP62	-0.354227	-0.662917	0.521368	3.89861	4.25284	0.802405	1.11693	6	7	10.7318	2.71411	4.01216	2.82799	5.16135	4.47394	5.32906	5.25123	2.70363	3.45722	4.14094	5.04012		3.70641	4.34332
B2L13	-0.322575	-0.660203	0.526636	0.0830099	0.405585	0.851183	0.810426	5	7	8.48543	1.061	-0.200588	-0.0431162	0.73495	-0.944893	1.09232	1.13942	0.058294	-0.725777	1.51217	-0.322957		-0.106684
TM9S3	-0.493645	-0.657509	0.524586	4.4827	4.97634	1.61932	1.15044	7	7	10.8271	5.63457	4.44118	5.19556	2.59586	5.70626	5.38751	5.87346	4.94254	3.60257	3.64767	7.01986	1.92025	5.45957	4.78642
WDR33	-0.269012	-0.657136	0.539597	1.96367	2.23268	0.0577754	0.997742	2	6	5.09852	2.87734	1.49541		2.3295	3.86229	1.5123	1.31925		2.00452	1.92282
DPM3	-0.594977	-0.652821	0.530521	4.70098	5.29596	0.939432	2.06641	4	7	8.81805	7.27552	6.22093	6.22496	2.50186	7.68158	3.02696	4.13993			3.57931	5.12526	4.35462		5.74476
TPSN	-0.458204	-0.651284	0.534011	5.57216	6.03036	0.978276	1.23866	4	6	7.61821	7.24064	5.8729	7.11461	3.86172	6.43516	5.65715		4.74398	4.73465		6.1853	6.6247
GPI8	-0.463179	-0.649283	0.529672	0.26008	0.723259	1.25407	1.31433	6	7	10.8399	-0.0807096	-0.148043	0.506357	-0.410973	0.00545951	2.82002	2.3707	-1.24207	-1.27838	0.523847	1.47756		0.553687	1.52584
PRP31	-0.348244	-0.648301	0.538836	1.02343	1.37167	0.587585	1.00556	4	5	6.55179		0.278359	0.30091	1.83058		2.36277	2.08574		0.99413		0.203185		1.42312	1.47327
FKB15	-0.36295	-0.647153	0.539328	-0.422942	-0.0599924	0.866264	0.872714	4	6	6.6159	-1.17902		-0.383424	1.23667	-0.392514	-0.342864	0.70119		0.830387			-0.566268	-0.829941	-1.12595
KAP0	-0.485852	-0.644282	0.531544	1.64427	2.13012	1.44516	1.37556	7	7	11.9709	0.370714	3.66095	1.19936	3.53377	2.21659	3.19262	0.736864	-0.159598	2.99949	1.73837	2.20585	3.44919	1.59601	-0.319405
HPCL1	-0.312932	-0.643021	0.534389	3.81054	4.12347	0.669803	1.0651	6	7	10.2066	4.171	3.60772	4.2096	5.07668	2.01638	4.92988	4.85304		3.69372	2.90346	4.81471	3.56387	3.55512	4.33237
XPP3	-0.474235	-0.641882	0.540808	1.1806	1.65483	1.34748	0.955809	5	5	7.21204		2.60301	2.52884	1.47962		1.38107	0.281626	1.43395	2.39304	1.53733	-1.13433	1.67301
SMC5	-0.248972	-0.639755	0.556962	1.10708	1.35605	0.54927	0.504408	3	5	4.02125		1.27277	2.14791	1.14291		0.780025	1.43666		0.594568		1.03977			1.6869
FXR2	-0.299829	-0.637452	0.565702	2.31303	2.61286	0.473821	0.808635	2	6	3.26818	3.62398	1.20342		2.70555	2.43325	3.0813	2.62963				1.97798			2.64807
PRS6B	-0.468458	-0.635126	0.539688	2.96106	3.42952	1.41913	1.20773	6	7	9.94197	1.84082	4.43331	3.85959	5.28313	3.01634	3.33544	2.23801	2.24124	3.21512	4.51363	1.30756	4.69042	1.7984
HEP2	-0.826113	-0.634041	0.628377	6.56734	7.39345	1.77495	0.494809	2	2	1.1545	7.74333				7.04357						5.31226	7.82241
EXOG	-0.190331	-0.632955	0.559894	2.30321	2.49354	0.0604963	0.665553	2	5	4.15985		2.56331	2.82908	1.38025		2.56085	3.1342			2.26043	2.34598
RPE65	-0.500304	-0.629972	0.553223	0.853251	1.35355	1.3147	1.09158	4	6	5.67232	0.754953	0.620895	2.32652	-0.0425272		2.79112	1.67037	0.632428	0.58009	2.67186	-0.471369
BAK	-0.241817	-0.627348	0.553912	1.58174	1.82356	0.201172	0.900297	3	6	5.90134	0.808206	1.72826	2.73339		1.00744	1.62433	3.03975	1.42463	1.51213		1.80848
MIC25	-1.04958	-0.627143	0.555128	2.32637	3.37595	2.06728	2.8737	3	6	5.62961	6.86063	2.03973	2.02409		6.99267	0.00407444	2.33451	4.71156					1.21622	1.05133
AMPL	-0.444081	-0.626261	0.545593	1.90944	2.35352	0.950603	1.61744	7	7	9.70316	2.50811	3.04686	1.49013	4.32261	-0.782272	2.80796	3.08124	0.762012	3.17391	2.52597	2.76904	0.869533	1.35629	1.90932
NDUV1	-0.422277	-0.625849	0.543686	4.66909	5.09136	1.39352	1.11575	7	7	11.4522	4.64387	4.31901	4.73028	4.75029	3.87442	6.75699	6.56467	3.51958	6.73308	4.11529	6.51819	3.27044	4.43507	4.09195
PRS10	-0.506796	-0.623594	0.54467	2.10825	2.61504	1.44623	1.59117	7	7	11.8922	1.42447	1.14787	1.56846	5.67826	2.09019	3.50373	2.89232	1.74195	3.6395	4.16592	0.192204	0.647874	2.28726	2.08302
S10AA	-0.425762	-0.622477	0.553131	2.62761	3.05337	1.73249	0.522757	7	7	7.08356	2.57497	2.28958	3.28259	3.49513	2.68348	3.53005	3.51777	1.11676	5.62715	1.08487	3.37577	0.877459	2.86505	3.44619
HNRPQ	-0.596471	-0.609545	0.560445	2.84218	3.43865	0.837577	2.44978	7	7	7.38383	-0.129724	3.99009	4.71232	6.01252	0.0580765	4.56447	4.86281	1.16749	3.39462	2.44723	3.0406	3.48884	2.81768	3.53882
CO8A1	-0.343359	-0.609344	0.564966	4.31922	4.66258	0.332752	1.31873	4	6	5.9108	4.82268	2.61093	3.53935	5.82413		5.84627	5.33214	4.64436		3.89948		4.51785	4.2152
ARPC2	-0.22801	-0.609271	0.554908	6.36825	6.59626	0.806903	0.573818	7	7	10.8326	6.8912	7.22691	5.51845	6.79769	7.00703	6.45024	6.28228	5.1317	7.36263	6.50628	6.84908	5.45928	6.34233	6.92641
CRBB2	-0.772636	-0.607045	0.560878	4.39797	5.1706	3.12435	1.25628	7	7	7.89072	5.24056	6.41315	4.72598	6.30682	5.24139	5.59505	2.67125	7.64337	2.78747	8.63478	1.75903	6.60118	2.3505	1.00941
ABHDA	-0.392994	-0.606232	0.557039	3.28605	3.67905	0.961775	1.36472	6	7	10.6692	2.8301	4.08111	2.41323	5.0114	1.71194	4.47189	5.23368		3.8242	2.62637	4.87405	3.46141	2.4672	2.46309
TTC19	-0.135021	-0.604837	0.572726	6.86768	7.0027	0.468611	0.108766	5	2	4.80161		7.07961	6.9258					6.84159	7.12701	7.02656	7.26675		6.07651
ACE	-0.363355	-0.602965	0.558768	2.25592	2.61927	0.980123	1.19216	6	7	10.9917	2.89401	2.68745	1.32884	0.922499	2.48648	3.88652	4.1291		3.28144	2.52099	3.10169	0.864256	1.27042	2.49671
KINH	-0.414667	-0.601014	0.56142	2.38266	2.79733	1.56423	0.94093	7	7	9.83936	3.79291	3.6532	1.88818	3.86734	2.54852	1.91932	1.91182	-0.908856	4.04943	3.01768	2.84987	2.07939	2.88001	2.71111
YIF1B	-0.363287	-0.600563	0.564755	2.27843	2.64172	0.518938	1.39035	3	7	7.99906	2.83621	0.303649	3.66352	1.27837	2.74874	3.41118	4.25034				2.85695		1.85395	2.1244
MCFD2	-0.0560127	-0.597847	0.56191	7.76629	7.8223	0.14875	0.19829	7	7	11.1288	7.90857	7.77864	7.80785	7.98996	7.43871	7.78681	8.04555	7.81853	8.0586	7.65783	7.75888	7.71743	7.76066	7.59208
ERP44	-0.125571	-0.595689	0.562489	5.89784	6.02341	0.382316	0.406067	7	7	11.9567	5.37576	6.44371	6.09129	5.97982	6.37113	5.59375	6.3084	5.19919	6.00485	5.56005	6.1095	6.31317	6.06142	6.03669
ERLN2	-0.133302	-0.593882	0.564934	6.10499	6.23829	0.487621	0.338965	7	7	10.701	6.19936	6.31349	5.74444	6.31094	6.07809	6.87058	6.15114	6.24344	6.59506	5.71611	6.37264	5.19237	6.18637	6.42894
TTC13	-0.354794	-0.593603	0.569238	0.805855	1.16065	0.702175	1.18485	4	6	7.96948	-0.131794	0.965863	2.73772	-0.21189		2.04421	1.55979	1.51861		1.28086	0.0703336	0.353622
EIF3E	-0.50637	-0.592602	0.56924	2.87731	3.38368	2.0645	0.921331	7	7	8.29873	2.48637	4.22122	3.36433	4.9132	2.65401	3.50007	2.5466	-1.209	5.31798	2.67369	2.78857	2.69516	3.39511	4.4797
LMNA	-0.0749055	-0.591332	0.566021	8.50619	8.58109	0.266402	0.20335	7	7	11.2198	8.72444	8.42016	8.42407	8.40142	8.95498	8.5226	8.61998	7.98599	8.72272	8.38113	8.75583	8.54214	8.48071	8.6748
ENOA	-0.101945	-0.590658	0.566131	7.23868	7.34062	0.353441	0.289145	7	7	11.5467	7.22947	7.42866	7.20924	7.92718	7.03022	7.37052	7.18906	7.5268	7.29505	7.73781	6.97233	7.29131	7.19026	6.65718
LMNB1	-0.13901	-0.58905	0.572907	7.57184	7.71085	0.585782	0.216094	7	7	7.60334	7.86055	7.54988	7.51802	7.39182	7.85568	7.91355	7.88645	6.33688	7.88036	7.56559	7.85656	7.42769	7.86083	8.07496
PICAL	-0.329677	-0.586008	0.577646	1.14302	1.4727	0.877166	0.863045	4	6	6.49791	1.70483	2.3419	0.324692	2.47545		1.25385	0.73547		2.35598	1.1858	0.668025	0.362285
PWP1	-0.581881	-0.582581	0.587663	0.956717	1.5386	1.2809	1.34267	3	4	4.58069		-0.471572		2.31924		2.18704	2.11969				-0.509193		1.86008	1.51926
SPRY7	-0.611757	-0.581415	0.594864	2.05554	2.6673	1.99869	0.806487	4	6	3.66074	3.11513		2.85718	1.08411	3.11395	3.22094	2.61249	1.30001	0.591707	1.32026	5.0102
OTUB1	-0.554198	-0.581295	0.572738	3.27997	3.83417	2.03208	1.49441	7	7	11.0212	6.90025	4.1708	2.99579	3.95572	3.65074	2.621	2.54486	2.88771	2.71924	6.94447	2.31169	5.13866	1.48076	1.47726
NUP54	-0.365924	-0.577847	0.602121	3.26992	3.63585	1.25126	0.259188	4	7	3.14797	3.62735	3.22271	3.98451	3.6121	3.74702	3.40757	3.84965		4.74587	3.8493	2.05427			2.43025
FKB11	-0.382034	-0.577374	0.577877	2.8931	3.27513	0.716685	1.53153	5	7	8.97718	2.36893	2.57328	2.79315	2.0522	2.29453	4.76885	6.07498		2.43181	2.12437	3.57443		3.73139	2.6035
RLA0	-0.371682	-0.576459	0.575324	5.95442	6.3261	1.08792	1.31397	7	7	11.5963	4.77511	5.48131	6.7916	7.98649	4.73945	7.14156	7.36717	6.78764	7.46434	4.71209	6.77724	4.644	5.61949	5.6761
ATP5H	-0.256512	-0.575232	0.576558	7.09874	7.35525	0.942394	0.709826	7	7	11.1503	6.45086	6.96935	7.92931	7.51814	6.51803	7.92308	8.17796	7.45661	7.64916	7.48396	7.74063	5.0717	6.80982	7.47926
PECA1	-0.368424	-0.572642	0.587312	6.93194	7.30037	1.69417	0.165291	7	7	6.11422	7.48387	7.2577	7.39489	6.9944	7.44831	7.28413	7.23927	3.33414	7.75176	7.80115	8.10355	6.2503	7.5886	7.69411
DNM1L	-0.378661	-0.570474	0.582088	1.73924	2.1179	1.54987	0.82584	7	7	9.15293	1.7129	1.96227	2.10858	3.54714	0.993562	2.78039	1.72045	2.51732	-0.169989	3.96067	0.117999	3.07746	0.844618	1.82659
ENY2	-0.3968	-0.568193	0.617794	2.21356	2.61036	0.775076	1.06017	2	6	2.44597	1.41695	2.49788		3.01581	1.33005	3.72771	3.67378						2.76163	1.6655
NXP20	-0.362123	-0.567593	0.650254	1.64478	2.0069	0.835986	0.536686	2	5	1.34773		1.18747	2.0666	2.581		1.84449	2.35494				1.05365		2.23591
RET3	-0.166853	-0.567237	0.587919	8.16436	8.33121	0.743214	0.230874	7	7	7.14731	8.26241	8.74323	8.25651	8.47739	8.07861	8.39411	8.10625	8.56781	8.11085	9.25327	7.77415	8.78605	7.20858	7.44982
SPT5H	-0.30034	-0.564039	0.585156	0.698022	0.998362	1.09533	0.748812	7	5	9.99916		-0.203173	1.02246	0.967914		1.78696	1.41764	-0.206219	1.80535	-0.293402	0.159134	-0.0375251	0.950706	2.50811
SELN	-0.533606	-0.561834	0.652849	4.73168	5.26529	1.24284	0.882184	2	6	1.35644	5.5399	4.67236	6.73636		4.19444	4.95033	5.49831				5.6105			3.85286
AT2B4	-0.409351	-0.559588	0.586396	2.55735	2.9667	1.48896	1.23647	7	7	11.6082	1.52536	3.23746	4.93457	2.16896	1.69514	3.39335	3.81205	0.857243	1.05312	1.8784	5.08494	2.39589	3.56329	3.06855
RUVB2	-0.174337	-0.552725	0.592319	5.55774	5.73208	0.451148	0.702044	7	7	10.2336	4.69778	5.49803	5.4316	6.96357	5.5931	6.18591	5.75455	5.41799	6.13021	5.5962	4.98631	5.6394	5.04786	6.08623
DPYL1	-0.660126	-0.551495	0.593222	1.94849	2.60861	2.67441	1.6961	7	7	10.1544	-0.481863	4.0091	4.16961	3.70818	1.73635	3.377	1.74191	1.85714	1.31827	6.30553	1.13642	4.67752	-0.870845	-0.78461
GBB2	-0.547606	-0.545953	0.597296	4.98139	5.529	1.36259	2.27724	7	7	9.80819	3.00795	4.04344	5.07774	7.8694	3.03367	7.78288	7.88791	6.45758	5.68108	3.64202	6.64577	3.04653	4.65744	4.73931
NDUS8	-0.351226	-0.541876	0.600019	6.52424	6.87547	1.47279	0.878469	7	7	9.78958	6.91151	5.13531	7.04566	6.58384	6.98407	7.71095	7.75693	4.51813	7.9152	6.33587	7.61822	4.4623	7.44547	7.3745
RS15A	-0.318833	-0.539412	0.600554	5.7517	6.07054	1.04779	1.07924	6	7	10.7916	5.30176	5.18064	5.18716	7.59817	5.22333	6.85819	7.1445		7.15547	4.75995	5.69477	4.5913	6.81053	5.4982
GSTK1	-0.327306	-0.537524	0.600791	3.92548	4.25279	1.0939	1.18271	7	7	11.9276	2.18292	5.45881	4.78032	4.82764	3.10536	4.30996	5.10451	2.07361	4.57492	3.02316	5.37944	3.93763	4.55812	3.93149
LAP2	-0.424074	-0.535948	0.61706	0.372866	0.79694	0.409902	1.70893	4	5	4.56453		2.97449	-1.25574	-0.585487		1.3146	1.53683			0.470243	-0.231836		0.615936	0.637119
UN45A	-0.362317	-0.534203	0.618362	-0.175609	0.186708	0.298636	1.46676	3	5	4.52858		1.59147	-1.19903	1.19362		-1.58559	0.933072		-0.0877045	-0.508332		0.0692078
STING	-0.392984	-0.532674	0.604206	2.3445	2.73748	1.27058	1.48176	7	7	11.7271	2.21223	2.18239	4.74159	0.0234333	3.03703	3.42651	3.5392	1.50003	3.19268	4.29867	2.00384	1.41809	0.729824	3.26836
RED	-0.269673	-0.529889	0.621773	3.16476	3.43444	0.700894	0.755987	3	6	4.40703	3.26651	2.25772	3.13206	4.52833		3.66789	3.7541		2.75282				2.76743	3.97404
RADI	-0.283789	-0.529084	0.610886	1.75475	2.03854	0.823545	0.934513	6	5	8.12898		2.02032	1.32266	3.61683		1.87444	1.35845		2.24812	2.23437	1.2545	0.927999	0.951634	2.91187
VPS29	-0.451887	-0.528473	0.630244	2.99269	3.44458	1.29173	1.1067	3	7	3.34589	2.33837	5.73972	3.19767	3.08363	3.60883	3.49699	2.64683				2.27977	4.48378	2.21453
XRN2	-0.299448	-0.527638	0.608316	1.48439	1.78384	0.888891	1.15446	6	7	10.9082	0.206444	1.18957	2.84556	2.43303	0.428295	2.93657	2.44744		0.834935	0.114804	2.20802	2.35697	2.06908	1.32256
RPB2	-0.398768	-0.521539	0.630319	1.10461	1.50338	1.42999	0.716767	4	7	3.88321	0.361421	1.84087	1.08167	2.47395	0.998164	1.88924	1.87834		3.07012	-0.360339	0.85612		0.852543
CSN1	-0.348849	-0.519952	0.616797	0.828031	1.17688	1.41729	0.898606	6	7	8.22548	1.26712	2.08752	1.15401	2.35641	-0.096372	1.28409	0.18538	-0.351038	1.54656	3.28808	0.854951	-0.310361		-0.0600025
SRP54	-0.225764	-0.516469	0.620392	0.866152	1.09192	0.362843	1.08811	6	7	7.50615	-0.329116	1.16212	1.57223	1.36741	-0.379371	1.63851	2.61163	1.39467	0.368185	1.11614	0.933493		0.650761	0.733665
2ABA	-0.299281	-0.515498	0.623952	2.51359	2.81287	0.118497	1.51995	2	7	6.24104	2.49462	4.38452	0.962967	3.01371	4.81678	3.131	0.886513	2.59738				2.4298
KCRB	-0.421898	-0.510019	0.621132	4.37648	4.79838	1.86386	1.1472	7	7	9.97548	3.94559	6.6132	5.1966	5.65191	4.04363	4.89179	3.24593	5.76462	3.90349	7.29042	2.91937	4.75181	4.44579	1.55987
ARL1	-0.205492	-0.509474	0.630651	2.0415	2.247	0.290088	0.82047	3	5	5.37385		2.71026	3.28664	1.32265		2.39098	1.52445			2.32901	2.04659			1.74891
TBL1R	-0.426272	-0.509082	0.624276	1.0461	1.47237	1.49501	1.33373	5	7	8.09624	-0.0865369	0.660773	1.81206	3.52733	-0.00587476	2.24085	2.158	0.227299	3.46646		0.6738		-0.439584	1.30252
TMF1	-0.282989	-0.507289	0.62755	2.87418	3.15717	0.307431	1.35924	2	7	6.99537	5.40327	1.70171	4.29081	3.73509	2.67239	2.02033	2.2766				2.65679	3.09157
AT1B1	-0.492102	-0.506616	0.689105	5.49978	5.99189	1.30862	0.781619	2	7	1.21215	7.40169	4.77401	6.22065	5.63805	5.98469	6.04988	5.87425	6.42512		4.57445
ERGI3	-0.541901	-0.506423	0.638347	2.80219	3.34409	0.99665	2.13038	2	7	4.13938	2.44919	2.54638	4.18661	0.921479	7.65804	2.64621	3.00075				3.50693		2.09746
GULP1	-0.373402	-0.505525	0.629778	1.24982	1.62323	0.272392	1.90945	3	7	6.5391	4.58815	0.245018	0.672042	0.277177	4.13164	0.194717	1.25383		1.19427	1.54571	1.00949
TIF1B	-0.269303	-0.502698	0.62529	4.08307	4.35237	1.15877	0.816195	7	7	10.7776	3.82797	4.82927	3.76075	5.55547	3.14533	4.80321	4.5446	2.05599	5.56288	3.47639	4.66272	3.48651	4.74677	4.59021
GNAI2	-0.189855	-0.500305	0.626064	7.13195	7.32181	0.661532	0.755249	7	7	11.7953	6.99272	7.12216	7.72666	7.61763	5.84814	7.92846	8.01687	7.34432	7.07175	7.63183	7.6051	6.11706	6.34632	7.80727
PIEZ1	-0.440955	-0.500243	0.627039	0.433841	0.874795	1.91583	1.32991	7	7	10.6928	-0.412774	1.77175	2.22171	-1.33499	1.15625	0.689742	2.03188	-1.5743	-2.15907	0.798707	2.48655	-0.121815	2.99916	0.60765
ERAP2	-0.421734	-0.495682	0.632877	1.20862	1.63035	1.45042	1.34866	5	6	8.36608	0.655861	3.42713		2.42904	-0.219523	1.10054	2.38908		1.10683		3.58924	-0.292465	1.12096	0.518539
SELT	-0.485921	-0.495664	0.643289	2.65345	3.13938	0.797311	1.79335	2	5	4.51749		3.16793	5.98102	1.7084		3.34314	1.49639				2.08967			3.21724
ZRAB2	-0.314534	-0.494064	0.634617	3.34138	3.65592	0.739815	1.26916	4	6	7.95257	4.82968	4.60505		1.92772	4.86127	2.68906	3.02273		4.15049			3.7741	2.84088	2.60006
NIBL1	-0.690854	-0.493322	0.641925	1.18949	1.88035	2.92236	1.3311	5	7	5.19729	1.1054	2.0342	3.38695	3.86717	0.0915536	1.30262	1.37454	5.91318	-1.43584	2.00602	-0.126131	-0.409759
NDUA8	-0.210697	-0.487175	0.636005	6.5082	6.7189	0.781802	0.77216	6	7	10.6514	7.49995	5.64765	6.25485	5.90263	7.52037	7.09763	7.10922	6.46985	7.38211	7.03784	6.82285	6.16848		5.16807
PRDX1	-0.0551294	-0.480267	0.644733	7.75049	7.80562	0.101917	0.286092	7	7	7.49873	7.71526	7.99857	7.8876	7.9277	8.21341	7.41262	7.48417	7.72053	7.85576	7.76815	7.54483	7.78206	7.74952	7.83257
MVP	-0.216015	-0.477853	0.641404	5.22422	5.44023	0.88132	0.808538	7	7	11.9119	4.36489	5.7196	6.17272	6.65328	5.07904	5.39159	4.70053	4.17595	6.9021	4.75918	5.62238	4.62153	5.30493	5.18346
PYRG1	-0.33047	-0.472169	0.690453	1.13391	1.46438	0.861798	0.769767	2	5	1.6969	1.55939		0.145809	1.68229		2.15342	1.781				0.52453		1.7433
STRN	-0.233978	-0.470247	0.650734	1.10086	1.33484	0.614915	0.958246	4	6	7.99841	0.193682	0.401151	0.987683	2.49644		1.68845	2.24164		1.41052	0.185153	1.31362			1.49416
COCA1	-0.8003	-0.469015	0.654279	-0.721659	0.0786412	3.88819	1.65635	6	7	6.54449	1.52318	-1.73386	-0.131037	0.0953395	-2.40824	1.93094	1.27416	6.76401	-1.70034	-2.65274	-4.23792	-2.23703	-0.265947
GSTP1	-0.227913	-0.467713	0.648902	5.88017	6.10809	0.787346	1.02091	7	7	11.2722	4.8199	5.85932	5.85934	7.32232	4.91149	7.01567	6.96857	4.56093	5.27102	6.81377	6.37159	5.55272	6.44144	6.14975
PSMD7	-0.472914	-0.465841	0.654885	0.15737	0.630284	0.848377	2.54842	7	7	7.31376	-0.494923	-1.3587	-0.111727	4.88311	1.0388	-2.47565	2.93107	-0.734304	-0.24977	1.05052	-0.0347574	-0.908654	0.9544	1.02416
MYO1C	-0.260278	-0.463256	0.653503	5.91322	6.1735	1.28726	0.743404	7	7	9.6016	5.04811	6.68685	6.21386	6.68314	5.18962	6.62733	6.76555	3.52267	7.30396	5.92756	7.1762	5.15178	6.13193	6.17843
TTYH3	-0.544417	-0.462302	0.670556	3.36659	3.911	0.530266	2.23267	2	4	3.57844	7.14693			2.13344		3.54244	2.82121				2.99163		3.74154
FBLI1	-0.279299	-0.459906	0.654541	4.96369	5.24299	0.999925	1.18961	6	7	10.9997	3.508	6.7519	5.77538	6.57898	4.8763	4.29887	4.91146	3.82777	6.4586	3.91457	5.57208		5.01002	4.99909
AL1B1	-0.459489	-0.458672	0.657361	1.76734	2.22683	2.0387	1.47511	6	7	8.9863	1.60923	2.00347	2.95553	0.513363	0.618424	4.52431	3.36351	2.83655	-0.00466459	1.85026	0.460776	0.188073	5.27307
STAG1	-0.246626	-0.458309	0.673708	2.35793	2.60456	1.0341	0.333418	4	5	3.50158		2.64923	2.53952	2.34299		3.1519	2.33914		2.88312		1.23203		1.79684	3.51974
ROCK2	-0.198014	-0.457893	0.660314	-0.270045	-0.0720306	0.311149	1.0833	5	7	7.31954	-0.225502	0.906214	-1.24073	1.87953	-0.721127	-0.60382	-0.498771		-0.782414	-0.297814	-0.186687		-0.121305	0.0379969
HACD3	-0.293713	-0.456274	0.656557	5.14135	5.43506	1.29933	1.10109	7	7	11.6855	5.57928	4.6313	6.17704	3.42389	5.45702	6.07722	6.6997	4.90603	4.39644	4.21079	6.26073	3.21599	6.46184	6.53762
FA49B	-0.405224	-0.454861	0.672923	1.22125	1.62648	1.26242	1.14547	3	5	3.97854		2.35694	2.44496	-0.140603		2.40583	1.06526			2.54669	0.033067		1.084
AGO2	-0.201008	-0.454782	0.661387	2.01362	2.21463	0.522324	0.873431	4	6	7.97724	0.91933	3.15087	1.37108	2.56858		2.81659	2.4613		2.70549		1.84011		1.45836	2.05052
WASF2	-0.410007	-0.452674	0.666562	1.59973	2.00973	0.873526	1.77428	4	5	6.05049			0.61468	3.12505	4.5977	0.998102	0.713138		1.61708		0.392487		1.94619	2.44316
FNTA	-0.388093	-0.450217	0.667823	0.978797	1.36689	0.92936	1.68868	5	5	6.21946	3.03485	0.728612		2.76521		1.44016	-1.13438		1.57959	0.761401	-0.141914	2.2189	0.476014
ATG9A	-0.189719	-0.448696	0.668607	1.61442	1.80414	0.649381	0.605623	4	5	6.32914		1.81665	1.06571	1.34157		2.42555	2.3712			1.06632	1.68793		1.20107	2.50235
S27A3	-0.273316	-0.448425	0.680571	1.37975	1.65306	0.321446	1.17586	4	4	3.4459		1.14197	2.72223	2.51153			0.236505			1.39309	1.74957		0.964971	1.41136
FINC	-0.219094	-0.447506	0.664317	5.2187	5.4378	1.11591	0.65775	7	7	9.7201	5.88299	5.52521	5.58242	5.62085	4.01477	5.4433	5.99503	7.44576	4.93569	5.6582	4.54456	4.96419	5.06609	3.91642
PGRC1	-0.203886	-0.446184	0.664989	2.65878	2.86266	0.634051	1.02939	7	7	9.97988	3.94131	3.27989	2.37277	1.44564	1.70341	3.33511	3.96051	2.53787	1.69106	3.84561	2.70812	2.47975	2.58105	2.76797
ADHX	-0.456086	-0.441101	0.670813	2.22478	2.68087	2.20688	1.34226	6	7	8.00301	3.06045	1.98603	0.672289	4.8483	3.70212	2.11789	2.37901	2.27132	0.555585	6.28446	1.37466	2.6764		0.186274
ABCBA	-0.102296	-0.437197	0.684656	5.4059	5.5082	0.175844	0.396417	2	4	3.97773	5.26293		6.00553		5.63923	5.12509		5.53024			5.28156
MARE2	-0.306092	-0.436488	0.674155	1.53564	1.84173	1.50329	0.897677	6	7	7.90785	0.599293	1.76621	2.85099	3.09286	1.00791	1.80315	1.77168	0.364757	1.74869	3.98774	0.0176495		0.662688	2.43229
RPN1	-0.152127	-0.435485	0.671313	6.99322	7.14534	0.576702	0.722235	7	7	11.4397	6.51767	7.04563	7.80402	6.93199	6.03128	7.71944	7.96736	7.65366	7.01148	6.54635	7.56791	6.01216	7.24067	6.92029
TSN18	-0.828132	-0.433353	0.714434	5.28844	6.11658	2.35094	1.63255	2	3	1.66051				6.97724		7.13871	4.23378		3.62608		6.95081
KPCA	-0.248817	-0.433189	0.673424	1.03922	1.28804	1.02138	1.04515	6	7	10.7718	0.0860316	2.29313	1.51043	0.630928	-0.0100616	2.06494	2.44089	2.21242	0.163615		0.330241	0.551739	0.506638	2.4707
EXOSX	-0.203552	-0.432504	0.682909	0.976825	1.18038	0.983044	0.375654	5	5	5.14381		0.533596	1.49022	1.37148		1.29191	1.21468		2.00416	0.283108	0.219152		0.276474	2.10123
TBB6	-0.249181	-0.432417	0.675648	5.55667	5.80585	0.697607	1.35565	7	7	8.96942	3.57219	5.27692	6.14167	7.17387	4.66529	7.07015	6.74085	5.26417	5.20086	5.40053	5.05042	4.94425	6.83672	6.19973
NPM	-0.194749	-0.431686	0.67408	6.98048	7.17523	0.732812	0.942152	7	7	11.3146	5.71629	6.53312	6.64337	8.0697	7.0879	7.97036	8.2059	6.96142	7.72363	5.93196	7.28005	5.99637	7.52231	7.44765
SMHD1	-0.229638	-0.43084	0.684437	0.745426	0.975063	1.1227	0.47326	5	7	5.02585	0.865791	0.732616	0.978304	0.900694	0.223363	1.4825	1.64218		1.25938	-0.321505	0.552259		-0.170625	2.40762
PSME3	-0.355156	-0.429038	0.684186	1.04974	1.4049	0.747219	1.69349	5	5	5.5006		1.9647	1.31477	3.8062		0.763942	-0.825123		0.875893		-0.169913	1.71727	1.35597	1.46949
HNRLL	-0.239803	-0.425566	0.68715	1.0785	1.3183	0.693175	0.887013	3	5	5.30169		0.905681	0.306952	1.92795		0.934625	2.5163			1.51233	0.27906			1.44411
F1142	-0.271955	-0.425084	0.683015	0.792349	1.0643	1.19468	0.93111	5	7	7.30704	1.39714	-0.220331	-0.312711	1.43354	1.55042	1.59323	2.00884		-0.574618	1.4613	2.31647		0.982923	-0.224332
TINAL	-0.315122	-0.424705	0.679475	1.08481	1.39993	1.33504	1.33205	6	7	10.6883	-0.911785	0.924735	1.34791	2.98488	0.666341	2.23854	2.54888	3.36107	0.7914	0.356237	0.872104		1.68778	-0.559742
NPC2	-0.292064	-0.423304	0.681221	3.79404	4.08611	0.884202	1.49593	5	7	9.79121	2.27777	5.99692	3.67771	5.36613	2.05591	4.71626	4.51203	4.20128	4.01326		4.46004		4.05186	2.24377
HPRT	-0.448644	-0.421211	0.690451	2.58067	3.02931	2.22252	1.01295	5	7	5.19875	2.3046	3.82833	2.43175	4.26336	4.19268	2.13202	2.05243			6.14221	1.5555	3.34318	0.932897	0.929542
RTN3	-0.10689	-0.420008	0.683412	6.06939	6.17628	0.351527	0.574289	7	7	9.94264	6.7061	6.01126	5.91058	5.10603	6.73345	6.55466	6.2119	5.50985	5.74508	5.94986	6.35583	6.46925	6.13665	6.31923
QSOX2	-0.416773	-0.419853	0.694615	1.19777	1.61454	1.38518	1.55584	3	7	4.32587	-0.277742	0.947033	3.23234	1.34745	-0.134828	2.66225	3.5253				1.46727		-0.302356	2.4284
RN213	-0.462583	-0.41514	0.725167	0.0177522	0.480335	1.37801	1.20864	2	5	1.67056		-1.50583	0.789317	1.4571		1.37987	0.281223		-0.956651					0.992156
RM03	-0.319195	-0.414974	0.688246	1.7893	2.1085	1.00404	1.54189	4	7	8.6654	1.28347	1.48727	2.70096	1.19686	0.00461386	4.27083	3.8155		0.401204		1.70572		2.46359	2.5867
SERC1	-0.42811	-0.412313	0.69531	2.9234	3.35151	0.749121	2.18747	2	6	5.64399	5.95991	3.05799		1.48529	6.19962	1.75906	1.64718				3.45311		2.39369
TCP4	-0.230873	-0.412113	0.687953	5.11885	5.34973	1.16939	0.910735	7	7	11.321	6.08931	5.42866	3.57468	5.42829	6.24962	4.86106	5.81646	3.78015	5.74956	4.39859	5.71547	3.74783	6.86618	5.57418
NPTN	-0.17513	-0.408955	0.69007	5.16018	5.33531	0.878783	0.715162	7	7	11.5243	4.78519	5.68809	6.25473	4.19566	4.93364	5.76177	5.72812	3.58432	4.60046	5.6906	5.99813	6.00324	4.85787	5.38666
THIL	-0.0945228	-0.408665	0.693686	6.38377	6.47829	0.568336	0.226894	7	7	7.86519	6.48468	6.51927	6.06415	6.69149	6.30959	6.70946	6.56941	5.72573	7.17299	6.37592	6.84795	6.7813	5.99956	5.78295
COA6	-0.251684	-0.406868	0.695779	2.7922	3.04388	0.58616	1.33437	4	6	7.2948	5.02797	3.6697	0.97656		3.21796	2.60352	2.76758		2.59783	3.35814	2.05703	3.15579
AASS	-0.294637	-0.4033	0.732428	1.0099	1.30454	0.903819	0.791464	2	5	1.66831	0.0226269			1.73079	1.11456	1.60611	2.04861				1.649		0.370805
NPC1	-0.215814	-0.399227	0.69972	2.28739	2.5032	0.590916	1.30246	7	7	8.36963	0.740834	1.956	3.12333	1.26072	2.69242	4.59834	3.1508	3.0591	1.48518	2.26974	2.12816	1.91098	2.07024	3.08833
ZNT7	-0.243608	-0.397978	0.711188	6.24423	6.48784	1.13903	0.593614	4	7	3.95585	6.15881	6.23623	7.16937	5.90053	5.81472	7.00465	7.13057		4.67912	6.12512	7.15729			7.0154
HUWE1	-0.259729	-0.396077	0.699675	0.132189	0.391918	1.01617	1.40623	7	7	10.9236	-1.03548	-0.44173	0.582887	2.13228	-1.48947	1.70131	1.29363	-1.54851	1.36935	0.335062	0.829884	-0.929578	0.401459	0.467657
LTOR1	-0.201998	-0.394018	0.700689	5.76223	5.96423	1.03969	0.87109	7	7	11.643	4.37479	6.33001	7.0067	5.45286	5.68879	6.45141	6.44507	6.56039	6.45686	6.45877	6.42364	4.86109	5.7178	3.8571
ARMC8	-0.301719	-0.391877	0.723517	0.85265	1.15437	1.22642	0.676127	3	5	2.75022		0.218016	1.38263	0.963997		2.08312	1.12409		0.66864		-0.271364			2.16068
CSK22	-0.174042	-0.391007	0.709307	1.32767	1.50171	0.707154	0.604606	4	5	5.99666		1.97306	0.703551	2.20991		1.19124	1.43081		1.1419		0.409409		1.79893	1.96044
TS101	-0.316453	-0.390802	0.712981	1.71368	2.03013	1.7357	0.610098	5	7	4.7127	1.30185	2.18674	2.49671	2.12615	1.06077	2.64812	2.39057	0.993038		4.76737	0.425823		1.21734	1.16482
VINEX	-0.215124	-0.390379	0.724839	2.39636	2.61148	0.684295	0.543295	3	2	2.71522				2.99565		2.22731			1.87259	2.14588	3.1706
PSA4	-0.35593	-0.388581	0.70452	2.04858	2.40451	1.59127	1.82781	7	7	11.7767	0.62075	3.38433	2.84904	5.07051	-0.391327	3.22445	2.07378	0.250824	3.10342	3.20142	3.63519	-0.520872	1.99173	2.67832
SPTN2	-0.389734	-0.387299	0.719794	0.750362	1.1401	1.90728	0.849884	4	7	3.69561	1.86453	2.53814	0.805245	0.43155	0.110407	0.816363	1.41444	1.00748		3.34729	-0.799557	-0.55376
SDHB	-0.172917	-0.386621	0.70724	4.74653	4.91944	0.612385	1.01254	7	7	9.87145	3.92576	3.89626	5.58833	4.1751	4.6	6.35473	5.89593	3.71598	4.66904	4.77297	5.55001	4.26442	5.21148	5.04179
K2C1	-0.39026	-0.386611	0.705961	4.62917	5.01943	1.74176	2.02461	7	7	11.7382	8.40176	5.24701	5.107	5.08674	6.1254	2.53484	2.63328	7.55202	4.90423	4.70519	4.06617	5.4927	3.8732	1.8107
SNX3	-0.539441	-0.38579	0.728295	3.56955	4.10899	2.24708	1.27765	3	6	2.67091	5.92669	4.43645		3.41651	5.09494	3.29315	2.48622		2.72311	6.11692	1.86862
GORS2	-0.251152	-0.38065	0.71056	6.16826	6.41942	1.38574	1.06162	7	7	11.2385	5.02601	6.13541	6.66787	7.47246	5.01342	7.26093	7.35982	5.67709	7.4901	6.81179	7.32307	3.38855	6.39741	6.08984
SQRD	-0.259091	-0.379492	0.718444	6.46766	6.72675	1.39896	0.723135	5	7	5.53805	5.61199	6.91387	7.13769	6.9751	5.78691	7.42071	7.24096		4.45487	5.63634	7.91922		7.0956	7.23224
SF3A2	-0.147955	-0.378397	0.7202	1.57709	1.72505	0.285519	0.813953	4	5	5.16226		1.92072	0.337691	2.35462		1.74853	2.26367		1.47596		1.21885		1.82234	1.79123
ARHG1	-0.349024	-0.375443	0.717092	0.859366	1.20839	1.45843	1.48124	5	5	7.99807		0.0536233	0.236396	3.69365		0.670542	1.38773		-0.702422	2.69545		2.09481	-0.0214011	0.23039
ODO2	-0.127476	-0.37427	0.714985	6.34873	6.4762	0.570735	0.697362	7	7	11.5484	6.30611	6.46498	7.19754	6.74032	5.05009	6.59809	6.97629	7.18081	6.53941	6.27312	6.42499	6.48496	6.28039	5.25742
CATD	-0.318176	-0.37141	0.721437	3.65965	3.97783	2.18355	0.607702	7	7	6.92393	4.36816	4.60137	3.99885	4.05138	4.22623	2.7135	3.8853	8.19421	4.29502	3.37626	2.93508	3.12671	1.556	2.13425
MDHC	-0.427891	-0.371073	0.71974	3.18515	3.61304	2.4129	1.58597	6	7	8.42588	1.98475	5.65884	3.92727	5.29911	4.19311	1.6224	2.60581	4.03095	-0.717191	5.8678	1.87605	5.21834	2.83496
UBR4	-0.20356	-0.368672	0.720723	0.137808	0.341367	1.2873	0.690584	7	7	9.18933	-0.162888	0.53686	0.334517	1.73217	-0.420812	0.233109	0.136613	-1.42246	-0.11854	-0.587595	0.144605	-0.675699	2.38121	1.24312
CSN2	-0.378383	-0.366242	0.721933	2.69581	3.07419	2.22352	1.34371	7	5	9.8439		4.2268	3.21939	4.45013		2.18728	1.28735	3.29367	3.12928	6.77999	-0.0470338	3.31372	1.02525	1.37577
RAB3A	-0.349826	-0.36542	0.721371	3.43306	3.78289	1.94904	1.61758	7	7	11.6059	4.97118	5.05482	4.37335	3.47101	4.98798	3.0345	0.587382	4.24065	2.79761	6.26181	2.7534	5.12678	2.50823	0.342959
HMGB2	-0.126584	-0.364587	0.724012	6.05024	6.17682	0.386646	0.818181	6	7	8.81566	6.83792	6.01653	5.73836	4.6572	7.14042	6.45442	6.39292		5.34212	6.38142	5.96698	6.3034	6.0056	6.30192
TRAM1	-0.25937	-0.363205	0.727209	4.27403	4.5334	0.966653	1.17549	4	5	6.97519		3.58511	4.97151	3.00612		5.43435	5.6699			3.02246	5.12338		4.94126	4.00901
THRB	-0.149712	-0.359575	0.726223	6.17405	6.32376	0.909376	0.621704	7	7	10.6031	5.87932	5.76533	6.1812	6.8883	5.5665	7.02384	6.96184	7.71624	5.61518	6.76524	5.42833	5.62625	5.31734	6.74977
ENOB	-0.153297	-0.358096	0.726496	7.25991	7.4132	0.790046	0.81157	7	7	11.9913	7.43124	8.43187	7.10181	7.93563	7.52	7.6346	5.83728	8.02117	6.90381	7.86133	7.07317	8.15891	6.8228	5.97816
MAGD2	-0.184862	-0.355542	0.735678	1.10216	1.28702	0.668663	0.921482	3	7	5.39031	-0.182211	1.90978	1.73474	0.320672	1.04843	2.27746	1.9003			1.39877			0.336503	1.57121
TALDO	-0.337139	-0.355428	0.729717	1.67246	2.0096	1.26081	2.01808	5	7	9.91017	-0.873915	2.92149	3.45364	4.18865	3.38121	-0.503252	1.49938		0.156274	1.61411	0.736409		2.80821	3.0473
DDAH1	-0.359323	-0.352896	0.74111	0.348295	0.707618	1.43304	1.5702	3	7	4.21562	0.084864	3.01979	0.0551919	2.6185	0.199922	-1.44711	0.422179		-0.104624		1.95307	-0.80356
LMAN1	-0.150918	-0.352411	0.731322	6.01178	6.1627	0.652846	0.926036	7	7	10.7827	5.7638	6.97413	6.93973	5.20868	4.74985	6.50172	7.00098	5.78305	4.79752	6.29498	6.9473	6.26945	6.05896	5.93121
CBX3	-0.185956	-0.352024	0.743488	6.53579	6.72175	0.768611	0.758202	3	7	3.79595	7.40229	5.4093	6.85809	7.05132	5.917	7.30083	7.11339				5.64848		6.99593	6.96297
MED1	-0.231547	-0.35115	0.746408	1.28363	1.51518	0.346197	1.28192	5	4	3.35173		2.5403	2.68423	0.188716		0.647468		1.79776	1.34006		0.950341		1.35562	0.974384
PSMD5	-0.273431	-0.34678	0.735972	2.12755	2.40098	1.65729	1.07083	7	5	9.9598		1.96269	1.74601	4.30627		2.04858	1.94135	1.28164	5.14798	3.50488	1.07339	1.22498	0.450793	2.20919
GNAS1	-0.161328	-0.343075	0.740285	6.2032	6.36452	1.14534	0.485875	7	7	8.0918	7.02316	5.66437	6.42695	5.80891	6.69711	6.30941	6.62176	4.57747	5.14228	5.48701	7.10932	6.364	7.45547	7.28682
QCR7	-0.0787396	-0.34292	0.737975	7.61873	7.69747	0.370442	0.481492	7	7	11.2601	8.34787	6.97041	7.23433	7.50009	7.99697	7.90193	7.9307	7.70734	7.94195	7.85667	7.69394	7.88666	7.32726	6.91729
TFG	-0.152603	-0.341708	0.742713	5.85804	6.01065	1.13851	0.316042	7	7	6.91923	5.66253	5.92318	6.60099	5.89499	5.7295	6.12071	6.14264	4.48525	5.5459	7.334	6.95369	5.61244	4.50056	6.57447
TMED9	-0.115579	-0.340675	0.742489	7.67741	7.79299	0.316624	0.839915	7	7	7.67154	8.26266	8.00299	8.18093	5.91209	8.07879	7.88504	8.22845	7.78431	7.38839	7.71063	7.87079	7.10455	7.92994	7.95328
WDR1	-0.236341	-0.340251	0.739584	4.06664	4.30298	1.24827	1.34877	7	7	11.9288	2.48164	5.34294	5.72007	5.93986	3.30208	3.76287	3.5714	4.6622	3.93209	6.46956	3.63108	3.21386	4.00136	2.55633
CMC2	-0.289384	-0.339383	0.740715	1.54778	1.83717	1.42462	1.64972	6	7	10.9949	1.26227	0.943618	3.25872	-0.356961	0.55782	3.08144	4.11327	0.982009		1.77044	3.67627	-0.331497	0.669671	2.51982
TM9S2	-0.267936	-0.335565	0.743317	3.40731	3.67525	1.66231	1.30366	7	7	11.3549	3.61085	1.94664	3.81818	3.36974	2.43566	4.79849	5.74717	2.90372	1.12326	2.78665	6.08795	2.79713	5.1418	3.01065
ECHB	-0.0679072	-0.334509	0.743839	7.32163	7.38954	0.400164	0.358257	7	7	11.8561	7.38006	6.90425	7.22979	7.6448	7.01408	7.73962	7.81416	7.55425	7.90758	7.13362	7.45208	6.77615	6.90548	7.52226
CYB5B	-0.287877	-0.33368	0.744401	5.92801	6.21588	1.56339	1.66312	7	7	11.9544	4.38105	4.86342	6.58689	7.43803	4.31298	7.83573	8.09308	4.15483	4.25053	5.40424	7.76209	5.1744	6.97903	7.77092
ETFB	-0.22815	-0.333678	0.744852	3.33498	3.56313	1.45172	1.07937	7	7	11.081	3.0014	2.9789	2.91652	3.92057	2.24632	4.57376	5.30443	4.78625	4.83977	1.59633	4.29046	3.95476	2.10433	1.77294
WBP11	-0.169582	-0.332789	0.760066	1.47254	1.64212	1.00459	0.171688	4	4	3.1751			1.60072	1.89021		1.58242	1.49514		2.49675		0.113552		1.44533	1.83452
KDSR	-0.256676	-0.330055	0.74865	4.06624	4.32292	0.99188	1.80267	7	7	9.32796	5.64645	3.72662	6.7016	1.23169	3.13137	5.09074	4.73197	3.9094	2.89328	6.08692	3.96344	3.43054	4.048	4.13212
SGTA	-0.465052	-0.328961	0.753955	3.90359	4.36864	2.35361	2.07261	4	7	5.68927	6.66838	4.37109	4.27411	4.53526	7.00656	2.54415	1.18094	3.28657	2.19193	7.36973			2.76612
KTHY	-0.173515	-0.324732	0.759127	1.82239	1.9959	0.700082	0.781476	3	5	4.77415	2.48779	1.03313		1.69365		1.71775	3.04719		2.63075		1.413		1.42342
EIF3I	-0.22035	-0.323951	0.751689	3.54201	3.76236	1.16791	1.36919	7	7	11.7089	3.90323	3.3737	1.75462	6.2975	3.35398	4.29799	3.35553	1.86227	5.51397	3.87708	2.78097	3.42291	3.0617	4.27519
IQGA1	-0.192992	-0.323897	0.751754	3.89549	4.08849	1.01434	1.20678	7	7	11.6552	3.01487	4.55073	4.12278	6.2781	2.49612	4.22007	3.93672	4.33354	4.85645	3.72455	4.11263	1.73192	4.40053	4.10884
RM23	-0.23608	-0.312715	0.76361	2.3739	2.60998	0.396642	1.85442	2	7	6.99866	1.19579	0.516534	3.85603	1.96405	1.09713	5.15354	4.48681			2.09343		2.65437
EF1A2	-0.343704	-0.311825	0.766965	3.8527	4.1964	0.355797	2.6526	3	6	5.34898	7.18745		3.39923	1.08445	7.58807	3.782	2.13721	4.2562		3.71788			3.58402
ARI1A	-0.125101	-0.31081	0.765011	0.456808	0.581909	0.539465	0.668023	4	5	6.98799		-0.0162071		1.27307	-0.191343	0.676744	1.16729			-0.133129	1.01636		0.797178	0.146823
AMPN	-0.263122	-0.310226	0.763774	4.20596	4.46909	2.02497	0.967042	7	7	8.60144	5.0136	4.7421	5.93296	2.79205	4.537	3.9686	4.29731	0.885666	4.91476	6.11782	5.80828	2.75166	2.96744	5.99613
NNTM	-0.203946	-0.310222	0.761734	4.00762	4.21156	1.19105	1.26759	7	7	11.9538	4.67578	3.43319	4.53082	1.69263	4.67762	5.06445	5.40645	4.76063	2.11495	5.2785	5.11527	2.78254	4.09938	3.90205
WLS	-0.18595	-0.309866	0.762454	2.81294	2.99889	0.996983	1.1667	6	7	10.9987	2.16203	4.24455	4.15656	2.54937	2.34424	1.38258	4.15293		2.47039	1.70887	3.60456	1.87926	2.94655	4.26803
CDIPT	-0.297928	-0.307648	0.773915	0.465053	0.76298	1.80247	0.868044	4	6	3.94286	1.13896	-0.52753	1.01792		1.1855	1.80052	-0.037476		-0.622116	-0.351189	3.16133			-0.327811
FAM3C	-0.235102	-0.307382	0.766129	5.09378	5.32889	1.34898	1.24393	5	7	8.29462	4.79702	6.07722	5.35822	2.9925	5.02138	6.45143	6.60444	6.66542		4.26961	6.46604		4.03888	4.02897
1433T	-0.120758	-0.307084	0.765373	7.16672	7.28748	0.903096	0.516615	7	7	9.54704	7.55228	7.56027	7.06194	7.6254	7.83224	7.06517	6.31507	7.66273	7.40109	8.27553	7.03975	7.80915	5.70472	6.27408
SRPX2	-0.256351	-0.302267	0.780591	0.751738	1.00809	1.28221	0.92532	3	5	3.28482	0.72581		2.51718	1.03367		0.00578335	0.757999	2.22698	0.122738	-0.094507
TPC2A	-0.18189	-0.302074	0.798319	1.02805	1.20994	0.757713	0.47593	2	3	1.54188				1.5474		1.41684	0.665579		0.492267					1.56384
PP1R7	-0.229011	-0.299666	0.769886	1.92461	2.15362	1.23448	1.60134	7	7	11.2702	2.45882	3.55683	2.15975	2.73881	4.11072	0.237904	-0.187513	2.18975	2.25595	3.83263	1.83126	2.62028	0.325877	0.416501
BLMH	-0.201388	-0.29687	0.780978	2.30851	2.50989	0.931491	0.826955	3	4	4.10666		1.79959		3.70372		2.31772	2.21855	2.90587	1.2352				2.78445
SAP18	-0.174215	-0.296655	0.773133	5.61171	5.78592	0.943111	1.08117	5	7	9.47078	5.30818	5.68479	3.76265	5.80294	6.51296	6.25326	7.17667		5.7847	3.97174	5.98413		6.38337	5.93458
PSA1	-0.326065	-0.296009	0.775607	3.87538	4.20144	1.16452	2.43397	6	6	7.1751	4.90313	5.94794	4.12928	4.86397	5.92391		-0.559583	3.74708		4.06474	3.46342	1.92046	4.83031	5.22624
ARHG2	-0.170159	-0.293187	0.778267	1.22929	1.39945	0.849419	0.884476	4	5	6.68774		0.98719	0.833984	2.83515		0.683954	1.65695		0.421817		0.85698		1.23695	2.4014
ZNF22	-0.250817	-0.292604	0.792356	2.69999	2.95081	0.4998	1.39805	3	3	2.50301			4.49445			1.76984	2.58812			2.95463			3.02119	2.12415
CT2NL	-0.197456	-0.288888	0.789911	1.76575	1.96321	0.613312	1.01261	3	3	3.29332		3.13189	1.41063			1.3471			1.15951	1.75184		2.3859
CO5A1	-0.253164	-0.288823	0.780136	1.39471	1.64787	2.14958	0.870343	7	7	7.91574	2.0578	0.82753	2.0317	1.69825	0.101045	2.43814	2.38062	5.73081	0.0970986	1.00049	0.514563	0.191769	2.64775	-0.419531
BAF	-0.0878138	-0.286619	0.77939	7.2717	7.35951	0.530974	0.612486	7	7	11.7633	7.13381	6.4161	7.02548	7.45286	7.25413	8.24076	7.99345	7.12049	6.84555	6.86313	7.71298	6.63461	7.7593	7.96584
HCD2	-0.169574	-0.277061	0.786498	5.25691	5.42648	1.08422	1.20277	7	7	11.8731	4.88238	5.41234	4.61407	6.42824	3.46034	6.3407	6.84728	4.81521	6.41861	4.79818	7.06212	4.72464	5.02785	3.95172
GDS1	-0.486043	-0.276625	0.805742	1.14421	1.63025	2.96459	0.972469	3	6	2.21842		2.65385	2.63241	2.18846	1.04799	0.523606	0.735204			4.33196	-1.53017	0.630837
BAG6	-0.151329	-0.271529	0.791451	1.66114	1.81247	0.755556	1.2281	6	7	10.1045	1.01998	0.984163	1.49205	3.30706	0.298825	3.56279	2.02242		1.20357	2.03492	0.614863	2.19751	1.27001	2.64596
SNF5	-0.205413	-0.268031	0.79465	0.940978	1.14639	1.27519	1.35454	5	7	9.10362	0.145263	0.82168	-0.412079	2.45626	-0.141584	2.59819	2.55701		1.02178	2.91914	1.11277		-0.357608	0.00880906
ESAM	-0.185364	-0.266353	0.79467	3.16297	3.34833	1.42728	1.16325	7	7	11.5307	2.81826	2.26998	4.12453	1.51752	4.24481	4.65389	3.80935	1.83689	3.37414	3.5592	5.05521	0.736851	3.71302	3.86547
EDC3	-0.0983068	-0.262952	0.802214	1.56494	1.66325	0.305044	0.763241	4	5	5.46626		0.752723	1.40399	2.70774		2.1352	1.31658		1.20373		1.90902		1.45073	1.69629
FABP5	-0.285962	-0.261188	0.809053	4.47813	4.7641	2.12373	0.705687	4	7	3.38377	5.31872	4.61832	4.36097	4.56193	5.56431	5.36586	3.55858	6.9185	2.39652	5.55927		3.03824
MEST	-0.30604	-0.256154	0.806062	1.07437	1.38041	1.29488	2.33675	5	5	6.24489	0.108606		1.30116	-1.77628		3.85005	3.41854	0.989549	1.68171		-0.937192		1.05215	2.58565
PUR9	-0.217547	-0.253877	0.807272	1.94943	2.16698	1.94428	0.854209	6	7	6.6399	2.26858	2.95444	1.05012	2.12112	3.53936	1.69214	1.54309	2.41266	0.730707	4.78275	0.778232	3.41846	-0.426228
PSA6	-0.244723	-0.249395	0.808168	4.29718	4.5419	1.89695	1.59436	6	7	9.87201	2.80925	6.18685	5.47888	6.56128	4.55104	3.57596	2.63006	5.38437	4.99264	5.54171	2.66982	5.95838	1.23617
THOC3	-0.198023	-0.248819	0.811996	2.3045	2.50253	0.729314	1.58179	4	5	5.85688		4.55889	0.829468	0.976822		3.08106	3.06638		2.56519		1.22172	2.80881		2.62229
STX18	-0.101323	-0.246367	0.821847	1.77949	1.88082	0.645889	0.387837	3	5	2.8913		1.70068	2.48834	1.49519		2.01892	1.70095				1.04315		2.04506	2.25026
CDS2	-0.259845	-0.246338	0.812748	3.30296	3.56281	1.64209	1.75211	4	7	6.74563	5.60464	4.45267	2.88156	1.13298	5.79509	2.54242	2.5303		1.61876		2.93598		3.10087	5.55625
PFD2	-0.253529	-0.245083	0.813717	3.92172	4.17525	1.50815	1.58349	4	5	6.71044		3.06228	5.69433	6.08533		3.2934	2.74091	4.70196	4.50207		1.66784			4.815
RECQ1	-0.184156	-0.24031	0.814816	1.01598	1.20014	1.10155	1.70217	7	7	10.2756	-0.908579	1.2756	0.757377	3.84576	-0.723422	1.57795	2.5763	-0.756592	2.39598	0.975358	2.13445	0.0493441	1.09571	1.21763
K2C7	-0.87622	-0.239005	0.847573	4.07072	4.94694	5.05037	2.19337	2	7	1.11015	7.85384	3.18878	3.98647	2.77149	7.13827	6.69503	2.99469	7.64187			0.499566
WDR5	-0.105141	-0.238271	0.819148	2.64424	2.74938	0.703789	0.704429	4	7	6.3736	2.98258	2.99616	2.00081	3.06573	3.75309	2.78996	1.65735		3.53685	1.84899	2.75686	2.43427
ARP2	-0.0959722	-0.237698	0.816129	5.39592	5.49189	0.767664	0.742851	7	7	11.9871	4.97179	6.06912	5.06978	6.36801	4.26499	5.85505	5.8445	4.24622	5.756	5.6777	5.65031	4.40404	6.31943	5.71773
TM87B	-0.283282	-0.236442	0.824219	2.69792	2.9812	1.69049	1.83848	3	7	4.18317	5.52558	4.99301	3.23629	0.818946	2.88372	0.768991	2.64186			1.57436	4.64208			1.87731
CNPY4	-0.0837407	-0.234936	0.823488	0.4717	0.555441	0.221593	0.743915	3	5	5.04967	0.719565	0.346418		0.186658		-0.217882	1.74245				0.21635		0.585216	0.613535
IF4H	-0.150767	-0.232311	0.821518	4.75414	4.90491	0.740033	1.51966	6	7	8.95658	3.85959	4.5592	2.81131	6.17648	3.92123	7.03558	5.97096		4.06186	5.98255	4.91208	4.86598	4.7915	3.91085
HLAH	-0.137838	-0.231798	0.823875	4.89723	5.03507	0.868864	0.900269	5	4	6.45046	4.38913	6.36732				4.73558	4.64824		4.30403	4.37476	6.41779		4.71443	4.67515
B4GT1	-0.190105	-0.231261	0.823041	0.948178	1.13828	1.21385	1.46658	6	5	7.82931		-0.183982	1.30789	-0.174126		1.35456	3.38708	1.68623	-0.698517		1.69548	0.30451	0.164512	2.53685
HDGR2	-0.164514	-0.225582	0.827974	5.44363	5.60815	0.966351	1.22147	4	5	6.99692	6.78943		5.29181	4.88581	6.9405		4.13318	4.49094	6.78667		5.33193		5.16498
UGPA	-0.140432	-0.223819	0.827428	1.1327	1.27313	0.847158	1.32324	5	7	9.94807	0.946821	1.16013	0.0177283	3.87812	-0.0890067	1.68219	1.31596	-0.234386		1.33071	2.09242	1.33639	1.13839
EEA1	-0.159433	-0.217734	0.83345	1.2339	1.39334	1.82561	0.648369	7	7	7.4899	1.45285	1.93354	0.711213	1.79671	2.30666	0.815169	0.73722	-0.622409	3.09457	2.15323	3.10429	-1.59681	1.85718	0.64728
LYPA1	-0.129555	-0.216398	0.832651	2.43352	2.56307	1.01942	1.13868	6	7	10.9636	1.99747	2.59725	0.980796	4.60262	2.23142	2.21698	3.31497	1.70593	3.64696	3.65881	2.55445		1.51348	1.52148
MA1A1	-0.0729477	-0.215843	0.838368	1.98983	2.06278	0.455344	0.432622	4	3	4.59115			1.58113			2.41838	2.18882			2.52268	2.10188		1.42492	1.90983
AP3S1	-0.232739	-0.212952	0.835301	1.68218	1.91492	1.90426	2.03242	6	7	10.8839	2.84551	4.38939	3.87303	-0.805676	1.22585	-0.506919	2.38328		5.00909	1.04639	-0.691136	2.37222	1.03343	1.32311
GLGB	-0.381993	-0.211041	0.843084	0.991007	1.373	3.34961	1.81633	4	7	4.03585	2.32116	4.16721	0.474369	2.88175	0.97128	-0.464127	-0.74064	-1.52214		5.16964	-1.90278	2.21931
WDR11	-0.0921746	-0.210136	0.853328	2.37713	2.4693	0.408468	0.466871	2	2	1.96531				2.79943			2.13917		2.08829	2.66596
TGON2	-0.21543	-0.208042	0.838998	1.87169	2.08712	1.7051	2.02833	6	7	10.9997	2.89731	2.25386	2.74139	-2.15609	4.38322	2.59544	1.89469		-0.328334	2.59447	1.93968	0.0516064	2.91942	4.05326
ARF6	-0.099517	-0.207996	0.839963	1.72118	1.8207	0.651487	0.929623	5	6	8.80664	1.56121	2.71205	2.03139	0.552516		2.95976	1.10725	2.38304	1.03868	1.92634	1.02279	2.23504
HNRDL	-0.10534	-0.207909	0.839464	6.67733	6.78267	0.969278	0.837189	6	7	10.0235	5.81963	6.73098	6.26058	7.20197	5.88761	7.80316	7.77477		6.84348	4.8598	6.75308	6.60907	7.44999	7.54858
MGST2	-0.0398367	-0.205776	0.840792	5.1072	5.14704	0.295846	0.418115	7	7	10.8038	5.23595	5.52314	5.47256	4.28222	5.21674	5.00648	5.2922	4.85577	4.88503	5.40506	5.53517	4.90611	4.8592	5.30408
RAC2	-0.111042	-0.20464	0.842415	2.5238	2.63485	0.789148	1.00961	5	6	8.98329	2.78996	3.92193	2.99566		3.23987	1.53169	1.32996	3.45104		2.3574	1.46878	2.19803	3.14377
FKBP9	-0.131255	-0.204636	0.842863	2.07219	2.20345	1.35842	0.852638	6	7	8.1706	3.71912	1.56467	1.10982	1.956	1.97022	2.32651	2.77778		2.19687	-0.458203	2.65559	1.89223	3.53744	2.6092
TIA1	-0.0433274	-0.202827	0.848036	2.64334	2.68667	0.183024	0.371304	3	4	4.54338		3.03735		2.96462		2.46112	2.28357		2.50593				2.8511	2.57298
TCTP	-0.142142	-0.200364	0.84681	6.4922	6.63434	0.950229	1.32813	6	5	7.10603		7.25067	7.22689	7.56832		6.81921	4.30663	7.10873	6.10765	7.17509		7.29121	4.79465	6.47588
DOCK9	-0.167633	-0.198842	0.846019	-0.00972838	0.157905	1.67591	1.3627	7	6	10.9839	-1.71376	0.814553	-1.43467	0.83399		1.43033	1.01698	-1.77296	0.159137	-1.03415	1.36404	-1.7668	0.229497	2.75313
EOGT	-0.122277	-0.194048	0.852583	2.11651	2.23878	1.03155	0.957781	4	7	5.9605	3.29581	3.17105	2.01192	2.99199	1.19468	0.900519	2.10553		1.97051	3.01611	2.75896	0.720451
UFD1	-0.132568	-0.190188	0.854609	2.75685	2.88942	0.859814	1.22686	4	5	6.93429		2.53115	2.23738	5.07189		2.39579	2.2109			2.96845	1.58894	3.6544	2.81563
5NTD	-0.103342	-0.187092	0.855625	5.45065	5.55399	1.28423	0.697459	7	7	9.25614	4.48457	6.06203	5.68379	6.35885	5.10633	5.02149	6.16088	2.89833	5.64093	5.14906	6.61033	5.47935	5.54789	6.82864
PCYXL	-0.22476	-0.185808	0.857065	2.83499	3.05975	1.66202	2.32563	4	7	8.2837	6.255	2.1973	2.15339	0.233862	6.34002	1.835	2.40366		2.04584		5.3276		1.99104	1.97547
ODR4	-0.102146	-0.184506	0.85674	2.25767	2.35982	1.09494	0.972905	7	7	11.8362	1.08825	1.97104	3.46196	2.45963	1.1938	3.11027	3.23376	2.3965	2.18442	2.78306	4.22752	0.918639	2.13311	1.16044
BL1S4	-0.127632	-0.183589	0.865272	4.73851	4.86615	0.608439	1.0391	3	3	3.22719	5.42414	3.66725	5.50705							4.0632			4.90834	5.24399
FMNL3	-0.19064	-0.183473	0.880849	1.33987	1.53051	1.40952	0.719494	2	6	1.17947		1.57002	2.54432	2.05306	1.30564	0.453297	1.25669	2.33654			0.343186
PPIA	-0.0220359	-0.176502	0.862863	7.72448	7.74652	0.242965	0.223779	7	7	11.9197	7.56955	7.97139	7.88876	8.03773	7.43675	7.69856	7.62288	7.7004	7.6207	8.12083	7.5297	7.96194	7.71557	7.42225
AL1A1	-0.11608	-0.175536	0.863804	4.55326	4.66934	1.05366	1.39675	7	7	11.1583	3.66878	5.19465	3.44902	7.18014	4.06706	3.50227	5.62348	2.29925	4.88067	5.20393	5.48002	4.35366	4.84659	4.8087
OSTF1	-0.07035	-0.173843	0.8674	1.58364	1.65399	0.420767	0.772987	4	5	6.35026		0.586017	1.30062	2.67117		1.79174	1.9204		1.53346	1.82537	1.01256			1.96318
TBC15	-0.124552	-0.172456	0.878785	2.07647	2.20102	0.847819	0.986551	2	6	2.02395		3.15858	3.68776	1.95578	1.67875	1.37626	1.349		2.67597				1.47697
H10	-0.0995416	-0.169618	0.868619	5.52102	5.62056	1.30661	0.83879	7	7	10.2274	6.11266	6.85328	6.2006	4.47932	5.72295	5.0542	4.9209	3.84944	6.78185	3.47096	6.0089	6.11322	6.45103	5.97171
PEF1	-0.123669	-0.168715	0.869209	4.87071	4.99438	1.60465	1.08912	7	7	10.5603	3.71289	3.99764	3.8184	5.85127	5.59111	5.9357	6.05365	3.65631	4.7253	4.21362	6.43152	2.58134	7.26216	5.22475
TIAR	-0.0998783	-0.166252	0.875307	1.71067	1.81055	1.08422	0.685031	4	7	4.41005	0.68857	1.93248	1.30168	2.08132	2.7149	1.56751	2.38737		1.51373		0.441622		1.81013	3.0772
UCHL1	-0.14271	-0.160338	0.878875	5.95888	6.10159	1.87604	0.786145	5	7	5.01376	5.56652	7.46572	6.67751	5.78529	6.28526	5.84364	5.0872	6.83358	4.91302	7.97128	3.23904	6.83748
S10AG	-0.127458	-0.154526	0.884273	2.55477	2.68223	1.81736	0.372069	5	7	4.24056	2.92177	2.51304	2.33998	2.59239	3.42201	2.51148	2.47495	5.57876	2.92906	1.27123	1.3506	1.64421
RINI	-0.12034	-0.153025	0.880994	2.52149	2.64183	1.59149	1.34023	7	7	11.6623	1.76179	3.16792	2.87403	5.33969	1.90584	1.43976	2.00379	3.27039	2.82943	2.07338	3.80785	-0.86677	3.055	3.48117
SPF27	-0.100977	-0.15096	0.883542	3.46271	3.56368	0.899077	1.31048	4	7	8.4665	1.94271	2.68422	4.27905	4.32936	2.06217	5.256	4.39229		4.72582		2.75054		3.4793	2.89517
TMX4	-0.121153	-0.149353	0.884379	1.8825	2.00365	0.984529	1.80254	5	7	9.55767	0.933892	1.95794	4.09302	-0.953531	1.14389	2.94703	3.90333		3.5286	1.36845	1.3199	1.13699		2.05856
CATC	-0.0870843	-0.149002	0.88467	4.00158	4.08866	1.15695	0.910743	6	7	9.49081	3.53003	3.74906	5.01431	4.88867	2.46512	4.26348	4.70997	6.08328	2.64263	4.00123	4.23532		3.54201	3.50499
RBM10	-0.0834808	-0.148945	0.89455	1.414	1.49748	0.6425	0.656467	2	4	2.12355			1.27905	0.701298		2.22446	1.7851		0.959681		1.86831
ITB5	-0.114734	-0.147004	0.886498	-0.259322	-0.144588	1.28779	1.29028	5	6	8.64933	-1.07823		-1.68174	-1.10512	0.649411	1.00254	1.3456	-0.848406			1.00415	-0.75354	1.13885	-1.83766
D19L1	-0.147571	-0.138378	0.895974	2.01881	2.16639	1.91888	1.23176	4	7	4.45558	1.21372	2.82067	2.82435	0.000917102	2.03559	2.52108	3.74837		-0.391052	2.24246	4.29494			1.92891
CUL4A	-0.0697822	-0.136352	0.897453	1.59908	1.66886	0.21509	1.11017	3	5	4.48107		0.183303	2.27307	3.09744		1.10595	1.68455		1.83907	1.42371	1.53447
SF3A3	-0.10745	-0.134503	0.895247	1.69401	1.80146	1.43839	1.54868	7	7	11.9351	0.560461	1.24789	1.13368	3.43571	-0.395668	3.2051	3.42307	-0.407717	2.5339	1.90939	1.88084	-0.153348	2.78953	3.30549
AAK1	-0.10371	-0.134483	0.895692	1.49836	1.60207	1.11423	1.55718	5	7	9.98722	1.10705	4.19579	-0.33598	2.56358	1.51584	2.16854	-0.000307073		2.60977	2.10205	2.07441	0.805501		-0.0999148
NTF2	-0.138831	-0.133138	0.897619	1.52813	1.66696	1.40217	1.86298	5	5	7.43088		-0.940894	1.71263	4.31155		1.82883	1.4227	2.45028			-0.334694	0.756744	3.24533	1.52301
EF1D	-0.0712134	-0.130373	0.898708	6.70645	6.77767	1.19201	0.817114	7	7	10.6189	7.16074	7.25283	6.91776	7.59202	7.0653	6.30297	5.15204	4.84563	7.63771	6.92719	7.1436	5.17906	7.65259	7.55939
P5I11	-0.0790229	-0.127922	0.901967	4.01293	4.09196	0.259693	1.58552	3	7	6.69596	6.23408	3.06877	3.10602	3.05142	6.23981	2.46918	4.47442			4.25711	4.0416		3.7401
HDGF	-0.0882503	-0.124947	0.903077	1.89345	1.9817	0.922797	1.51654	5	7	9.85892	1.41813	3.09767	2.2001	4.30687	1.62641	-0.59285	1.81554		3.44621	1.65411	0.970383	1.62885		1.76768
LEMD2	-0.106227	-0.122798	0.904907	4.11303	4.21926	1.08413	2.01567	7	7	9.20334	6.54678	4.78372	5.34956	0.310328	4.6336	3.01376	4.89707	3.69081	3.3726	3.5976	6.36743	4.67717	3.47557	3.61004
HNRPU	-0.0472706	-0.122772	0.90432	6.25572	6.30299	0.717335	0.723293	7	7	11.9992	5.66947	6.74165	6.12638	6.92338	5.05992	6.58833	7.01182	5.06426	6.34935	6.14387	6.48587	5.68086	6.86704	7.19882
RAB5B	-0.070567	-0.121486	0.905861	2.40236	2.47293	1.3311	0.711137	7	6	9.4092	1.48919	2.35365	2.1094	2.28259		3.24863	3.35413	2.22164	0.744522	0.734851	3.08609	2.20419	3.93172	3.89354
PURA	-0.0953276	-0.120175	0.908168	2.43578	2.53111	2.08475	0.241665	7	7	6.16122	2.40339	2.74417	2.66438	2.85099	2.53907	2.15979	2.35597	0.855896	4.54125	6.12691	0.684223	2.08638	1.15944	1.59638
PTSS1	-0.115603	-0.116103	0.911664	2.87658	2.99218	0.766517	1.99444	3	5	5.54032		1.68642	4.30925	0.105383		4.47273	4.38712			3.10865	3.50024			2.02084
THTM	-0.105405	-0.116098	0.909671	2.4208	2.52621	1.80953	1.46254	7	6	10.9785	-0.335388	2.60594	2.6455	3.15302		3.44219	3.64599	1.74037	4.58093	1.28237	5.26391	1.64962	0.311019	2.11742
PAPS2	-0.131586	-0.113622	0.922633	1.65797	1.78956	1.46928	1.35376	2	7	1.52895	1.51192	0.163019	0.571763	4.26068	1.4316	2.44705	2.14088		2.69691		0.619037
K22E	-0.124612	-0.0962109	0.925219	3.40598	3.53059	1.77776	2.83823	6	7	10.1883	7.66494	3.70179	3.28974	3.36838	6.28305	-0.635459	1.04168	5.90761	1.01295	1.95534	3.13688	4.62559	3.79748
ASAP1	-0.0393961	-0.0952689	0.930478	3.74165	3.78105	0.269108	0.63591	2	3	2.81288				4.46873		3.66015	3.21427			3.55136				3.93194
ANXA4	-0.0252745	-0.0938675	0.926937	7.19191	7.21719	0.582514	0.410088	7	7	10.7746	7.41543	7.20416	7.62392	7.36734	6.41432	7.50751	6.98763	7.99779	6.99136	6.86912	7.48132	6.16887	7.48801	7.34693
LGUL	-0.0434226	-0.0926684	0.928496	2.79617	2.83959	0.45505	1.15321	7	7	7.82422	1.08819	3.066	2.95306	4.19407	1.67194	2.78114	4.12272	3.48154	2.52499	2.23165	3.12923	2.32408	2.89177	2.9899
PIPNB	-0.0741622	-0.0873636	0.932893	0.801101	0.875264	1.61701	1.08905	5	6	6.81638		2.34365	2.10296	0.105498	0.622727	0.362186	-0.28544	-0.32853	-0.753012	3.36337	0.549645	1.17403
SG196	-0.0341132	-0.0846117	0.935492	2.20672	2.24084	0.49741	0.693153	3	6	5.6418		1.34696	2.38266	1.41854	2.93202	2.82254	2.54231				1.63266		2.50964	2.47788
SUCB1	-0.0750192	-0.0833339	0.935058	2.59341	2.66843	1.89713	1.44005	7	7	11.1909	4.37967	2.15444	2.73875	2.26778	-0.0333666	3.81096	3.36077	0.361021	4.02217	2.891	5.59359	0.374725	1.94603	2.96535
RDH13	-0.0681254	-0.08304	0.935459	2.31467	2.3828	1.17027	1.67152	5	7	9.99798	2.68625	-0.418516	1.26733	1.53322	3.5039	4.14771	3.95969	2.88467	0.330356		2.68382		3.3536	2.32091
RAVR1	-0.0312816	-0.0810555	0.938175	1.54629	1.57757	0.44553	0.643333	3	5	5.68531		0.918138	0.947182	1.58441		2.22921	2.20891		1.04846				1.68286	1.90755
VATF	-0.044546	-0.0800831	0.937848	4.81924	4.86379	1.106	0.859518	6	7	9.41424	4.03425	5.89329	5.14018	6.09819	4.03534	4.48937	4.3559	4.81073		4.58394	3.40917	6.81812	4.55347	4.74003
ANM1	-0.0504633	-0.0769336	0.939962	4.23544	4.28591	1.29793	1.152	7	7	11.8332	3.3481	3.37236	4.26988	6.16054	2.93777	5.05014	4.86257	1.72029	5.08213	4.14311	4.82919	3.96035	5.84767	4.06536
CHD3	-0.0419084	-0.0765595	0.94542	0.593885	0.635794	0.626216	0.719619	2	5	2.18318		0.556894	0.0220683	-0.0895257		1.62508	1.06445		1.03669		0.151084
NDUB5	-0.107273	-0.0754136	0.941801	4.07389	4.18116	1.94211	2.54611	4	6	7.72686	7.37951	2.42739	1.77556		7.41662	2.67889	3.40899		2.09695	5.92073	5.55099			2.72689
LMNB2	-0.0302612	-0.072318	0.944123	7.22616	7.25642	1.02267	0.424047	7	7	8.00393	7.56255	7.03151	6.40636	7.2386	7.51581	7.46812	7.57197	5.08633	7.93528	7.44114	7.77051	6.77567	7.69035	7.88382
MOGS	-0.053039	-0.0719093	0.944013	3.48873	3.54177	1.61162	1.10039	7	7	10.5956	3.11207	2.6828	4.83571	2.18601	2.92186	4.02454	5.02939	2.37028	2.04853	3.43841	5.40016	1.35445	5.04248	4.7668
GLYG	-0.111597	-0.0683687	0.949509	5.93388	6.04548	2.48725	1.90083	3	6	3.22852		7.55156	3.74794	7.34703	7.33679	6.80832	3.48123		7.10015		3.07781	7.62368
TRA2B	-0.0718078	-0.0675306	0.947327	5.92243	5.99424	1.75209	2.20113	7	7	11.4253	3.49442	3.90025	6.63016	7.91656	3.73834	8.00075	8.27919	7.12557	7.27141	3.24677	7.38614	4.38047	7.33712	4.70955
QCR2	-0.0185535	-0.0666939	0.94796	7.36077	7.37933	0.47036	0.566112	7	7	11.6103	6.99146	7.64693	7.95283	7.35413	6.30323	7.74424	7.66246	6.951	8.06695	7.47476	7.70643	7.40095	6.63881	7.28652
KAD1	-0.0589238	-0.0621677	0.951807	3.29381	3.35273	2.23842	1.1305	7	7	8.87384	2.82117	4.8178	3.11542	4.09281	4.25458	2.92133	1.44599	2.77133	1.93493	6.25385	1.69907	6.54658	0.849992	3.00088
CDC23	-0.0217065	-0.0614353	0.959374	4.21568	4.23738	0.165882	0.471336	2	2	1.24398						4.57067	3.9041		4.09838				4.33297
TFPI1	-0.0229184	-0.0585409	0.95476	2.41164	2.43456	0.499093	0.738892	4	6	7.96669	3.12958	2.34034	2.93075	3.09843		1.53596	1.57232			2.09421	3.15584		2.16983	2.22669
NMT1	-0.0336373	-0.057378	0.955653	1.97043	2.00406	0.703666	1.14863	4	6	7.99251		1.68002	0.590669	4.03842	2.37128	1.67796	1.66603			1.97109	0.986667		2.33077	2.59317
RM17	-0.0528278	-0.0563289	0.961222	2.67196	2.72479	1.17114	1.16462	2	7	1.62331	2.48175	0.928474	2.14838	2.30319	2.85314	4.39689	3.96167						1.84384	3.50008
CB047	-0.0273437	-0.0483111	0.96621	1.96038	1.98772	0.684097	0.777475	2	7	1.83266	2.29334	0.963147	1.42741	1.91063	1.42731	3.02561	2.86663				2.44411	1.47665
CALD1	-0.0152141	-0.0460692	0.964355	5.18917	5.20438	0.32829	0.79856	6	7	8.21604	6.17362	5.66116	4.38597	5.70384	5.5497	3.9374	5.01901		5.20557	5.15455	5.60918	4.65968	5.44338	5.06265
VAT1	-0.0257947	-0.0431486	0.966326	4.81671	4.8425	1.23465	0.988573	7	7	11.4523	3.57634	5.61543	4.78464	6.01903	3.43817	5.23002	5.23389	3.09205	5.27351	6.27054	3.71578	6.14193	3.9803	5.24285
CTBP2	-0.0233462	-0.0403314	0.969153	4.09436	4.11771	1.16216	0.674295	5	7	5.92649	4.46263	3.75374	3.35511	5.11988	3.30486	4.2487	4.57902		3.23695	3.01752	5.84654	3.72657	4.64423
TBB8	-0.014368	-0.0377154	0.972059	8.44907	8.46344	0.214379	0.741537	6	4	3.33741		7.78149	7.86517			9.16349	9.0436	8.12798	8.52839	8.66574	8.24968		8.62649	8.49614
ANXA7	-0.016602	-0.0370998	0.971264	6.71271	6.72931	1.07341	0.499545	7	7	8.4825	7.05784	7.07326	7.27783	6.04528	7.07006	6.31242	6.2685	6.26579	7.01559	4.45571	7.22019	7.4309	7.47884	7.12195
DJC13	-0.0272349	-0.0353879	0.972417	1.00066	1.02789	1.40202	1.3671	7	6	10.7787	-1.72051	1.58814	1.19621	1.92845		1.51199	1.66307	-1.82377	2.24961	0.952762	1.44614	0.415967	1.59839	2.1655
GNAQ	-0.0109984	-0.0342921	0.97335	5.67265	5.68365	0.73633	0.421751	7	7	9.55429	6.15835	5.26321	6.29073	5.33791	5.62638	5.28953	5.81943	5.9896	5.55531	5.91089	6.87543	5.71581	4.50212	5.1594
NFL	-0.0428965	-0.0342306	0.974102	2.06639	2.10928	1.68522	1.93457	3	6	4.68956	4.88859		2.59533	0.132089	3.62751	1.25377	0.158417		0.980857	4.00779		1.21052
ARP3	-0.0164645	-0.0336003	0.97375	6.46855	6.48501	0.943103	0.889564	7	7	11.9592	5.09909	6.16512	6.27115	7.61613	5.85658	7.17299	7.21402	5.48099	7.9491	6.14902	7.58031	5.71001	5.96317	6.44725
CD81	-0.013274	-0.0323701	0.974773	7.57514	7.58842	0.737513	0.736695	7	6	10.7001	6.24342	7.28606	8.20655	7.70459		8.02584	8.06405	7.76415	8.31273	8.15878	8.1466	6.90479	6.33502	7.40392
LAP2A	-0.019673	-0.0298925	0.976688	2.33225	2.35192	1.09237	1.28053	6	7	10.9991	2.00392	0.675157	1.13301	2.51534	2.16151	4.05214	3.9224		3.04097	0.851128	3.15594	1.29255	2.11146	3.54146
UGGG1	-0.0109141	-0.0266951	0.979142	4.87065	4.88157	0.751733	0.777796	7	7	11.9861	3.92848	4.42812	5.14708	5.45778	3.91474	5.5946	5.70017	3.86308	5.97646	4.52116	5.69495	4.37917	5.06024	4.59952
PDC6I	-0.011904	-0.0261596	0.97956	3.72962	3.74152	0.859776	0.842795	7	7	11.9952	3.39858	5.04939	3.34885	4.72121	3.74654	3.19508	2.73102	2.84247	3.8157	4.66554	4.69455	2.97023	2.78509	4.33375
PSB6	-0.0257813	-0.0245251	0.980839	2.7755	2.80128	2.03576	1.89503	7	7	11.9389	2.32789	4.04768	-0.498609	4.96469	4.58679	2.10506	2.07544	2.08009	0.085805	2.99292	1.42098	6.49611	3.91845	2.43412
RFIP5	-0.0157777	-0.0236927	0.981822	1.37202	1.3878	1.29192	0.740439	5	5	6.37191		1.45391	0.759164	0.660402		2.49773	1.56781		1.86694	-0.740058	2.57248		1.11002	2.05074
ACSL1	-0.0346338	-0.0232622	0.982305	0.703738	0.738372	3.10363	1.42518	5	7	5.21677	0.164134	-1.42981	3.22142	0.398342	0.372899	1.59218	0.849433	6.11985		-0.92591	-1.26193		-0.920275	0.50695
RT36	-0.0252745	-0.023145	0.982386	3.84871	3.87398	2.2649	0.912502	5	5	5.26522	5.24175	3.32089	3.36022			4.37341	3.07363	4.98813	7.32763		2.3355	2.35618	2.2361
AL7A1	-0.0179701	-0.0230618	0.982096	3.12862	3.14659	1.81909	0.970131	7	7	9.15757	4.58669	2.89685	3.26303	2.39817	1.68415	4.03996	3.15731	3.11879	2.93964	3.97967	6.3772	0.308013	2.61939	2.55767
ACADV	-0.00928587	-0.0208766	0.983815	5.30108	5.31037	1.05795	0.51543	7	7	8.69643	5.10481	5.63072	5.29466	5.99301	4.42946	5.04218	5.67772	7.30717	5.58024	4.68758	5.78748	4.0792	5.01861	4.64728
TNR5	-0.0165824	-0.0202315	0.984943	1.59611	1.61269	1.21683	1.117	3	7	3.55103	1.74832	2.9696	2.25675	1.05489	2.30291	-0.483598	1.43999			0.242198	2.59843			1.94771
TAP1	-0.0120888	-0.018825	0.985405	1.52616	1.53824	0.66078	1.50844	5	7	8.71352	2.09441	1.32423	3.39414	-1.40509	2.20575	0.968449	2.18582		1.01283	1.31777	1.18846		1.43765	2.67408
HS90A	-0.00369114	-0.00877623	0.993191	6.5691	6.57279	0.990863	0.506382	7	7	8.93396	6.66846	6.82903	6.65575	7.22597	5.67102	6.79561	6.1637	7.37151	6.80533	7.90705	5.92396	7.06824	5.80594	5.10168
LKHA4	-0.00639404	-0.0059701	0.995386	1.70802	1.71441	1.80834	1.5701	5	5	7.84549		3.1127	3.1461	1.68915		1.29238	-0.668275		-0.494195	1.33559	1.99716		4.49341	1.20813
DYN1	-0.00550712	-0.00568599	0.995931	1.85912	1.86463	1.63167	0.595294	3	7	2.23227	1.31716	2.30082	3.01562	1.69408	1.50246	1.50457	1.71768		1.03976	3.7381		0.799504
VKGC	-0.00282683	-0.00386449	0.996982	1.9085	1.91132	1.47469	1.25332	7	7	11.696	2.60789	1.68843	3.03899	-0.598689	1.43502	2.861	2.34663	0.473126	0.650644	2.03996	4.15003	0.73034	1.69505	3.62033
ITM2B	-0.00289555	-0.00210259	0.998391	2.35999	2.36289	2.00291	1.8906	4	4	5.98013	4.58897			0.159389		1.67633	3.02685		-0.320036	2.07327	4.27315			3.41358
PDCD6	0.000264962	0.000485565	0.999621	4.07912	4.07886	0.95982	1.07847	7	7	11.8406	2.51961	4.12498	4.7775	4.59491	2.59493	4.98278	4.95729	3.0653	5.87048	3.37582	4.82216	3.68763	3.8594	3.87308
RO60	0.00329487	0.00299221	0.997739	-0.220207	-0.223502	1.21564	1.96594	6	4	4.54708		-0.0363929	-2.34019	2.3565			-0.873917	-0.617799	0.745831	0.613556	-2.06268	-1.02741	1.02726
THTR	0.00344387	0.00536535	0.99582	4.16447	4.16102	1.37218	0.926334	7	6	10.5108	3.73844	5.56216	4.33337	3.00418		3.53921	4.78879	3.12223	4.39341	4.97957	5.81468	2.1955	3.13047	5.51543
PLIN3	0.0034144	0.00539033	0.995867	2.52988	2.52647	0.219655	1.65902	6	7	6.24479	0.269583	2.13798	4.06762	3.9969	0.372387	3.91741	2.92341	2.68382		2.52829	2.17605	2.48698	2.8262	2.47795
VP13C	0.00406004	0.00672928	0.994743	-0.0914744	-0.0955344	1.06196	1.19179	7	7	11.8438	-1.62009	-0.340586	1.27958	0.493897	-1.66195	1.09289	0.087526	-1.00759	1.43899	0.801045	0.517989	-1.02216	-0.0331839	-1.33541
IPO9	0.00491246	0.00770322	0.994777	0.789962	0.78505	0.819642	0.594872	2	5	1.4497		0.22183	0.392467	1.74134		0.906594	0.66302				0.210388			1.36954
E41L2	0.0161534	0.0116908	0.991261	2.22079	2.20464	2.60027	1.23759	4	7	3.79513	0.372926	3.5088	2.3034	3.26103	0.729327	3.11443	2.14254		0.588986	3.35352	-0.37694	5.31759
PSB1	0.0129118	0.0130237	0.989903	3.78777	3.77486	1.41169	2.04674	7	6	8.70311	1.65465	2.65825	3.1687	7.14053		5.3163	2.71071	2.00406	3.72816	5.61268	3.74992	1.9026	4.72691	4.79004
RAB14	0.00895552	0.0158574	0.987613	6.36231	6.35335	1.12072	0.988241	7	7	11.815	5.0107	6.80093	6.4798	6.92563	4.91903	7.42003	6.91737	5.25147	6.55996	7.20156	6.9516	4.40308	7.49075	6.67774
PSME2	0.0197736	0.0185536	0.985607	1.62069	1.60092	2.04178	1.48495	6	5	8.88646		2.32136	-0.372678	3.56912		0.871386	1.61541	0.0764661	-0.36851	1.52605	3.83004		4.40446	0.25565
ENPL	0.00454002	0.0186046	0.98555	7.98333	7.97879	0.309327	0.56671	7	7	9.28369	7.36106	8.0698	8.34367	8.44665	7.00191	8.26069	8.36776	7.44708	8.14132	8.0317	8.19508	7.71897	8.36347	7.98571
PP1G	0.0250307	0.0191576	0.987666	5.08287	5.05784	1.82019	0.550905	2	6	1.0618	4.87716		4.42551	6.0912	4.95889	4.99578	4.99849			6.36994	3.7958
SYCC	0.0142062	0.0208371	0.983963	0.593294	0.579087	0.765623	1.3733	3	7	6.92762	-0.0920735	0.425508	0.442302	2.99227	0.221516	1.49376	-1.42967		1.47689	0.126625			0.176364
LRRF1	0.0177147	0.025044	0.98054	0.888059	0.870344	0.919072	1.63023	7	7	9.46406	-0.206994	1.40185	1.12858	3.80712	1.01977	0.438761	-1.49669	0.82738	1.64813	-0.480655	1.81044	0.241001	1.88077	0.289348
NOLC1	0.0338853	0.0253221	0.980446	4.17369	4.13981	1.35522	2.87218	3	7	7.65531	6.88186	4.73359	5.79427	2.36219	7.55235	1.86056	-0.206164		5.72934	3.54283		3.24891
GLNA	0.0232071	0.0292931	0.97728	6.27475	6.25154	1.62248	1.14992	6	7	8.86323	5.14281	7.58576	6.9171	7.0187	4.38625	6.79788	5.91229	6.6009	6.56973	8.37562	4.8758	7.30478	3.92165
FA10	0.0165757	0.0295901	0.978478	6.53972	6.52315	0.417149	0.900491	4	3	2.64984	7.09702			5.48529	6.98714			6.69433	5.91739			6.74669	6.80049
PAIP1	0.0289527	0.031232	0.975897	3.30187	3.27292	1.26712	1.6405	5	5	7.51993	1.9207			3.62325	5.9416	2.82865	2.05039	2.15069	5.2375	3.7458	3.13432		2.24105
TBB5	0.0121427	0.0328381	0.974505	8.16901	8.15687	0.463661	0.861481	7	7	9.20699	7.0308	7.71538	8.60866	8.84599	7.07428	8.9163	8.90668	8.02801	8.34814	8.37347	8.16212	7.20491	8.55872	8.50771
CDC42	0.0229886	0.0337943	0.973782	6.55329	6.5303	1.38623	0.998637	6	7	8.9602	4.81045	5.52802	6.4495	7.15745	7.08591	7.33011	7.35066		5.14512	4.94474	7.17878	6.13235	8.46697	7.45176
VP26A	0.0343171	0.0346239	0.973746	1.95107	1.91675	1.72828	1.189	4	6	4.89921	0.795974	3.81629	1.02441	2.84269		1.17847	1.84269		0.360833	1.97173		4.34828	1.12344
HCFC1	0.0214087	0.0356521	0.972622	1.70948	1.68807	1.36819	0.583252	6	7	6.54661	1.30149	1.92952	2.0175	2.26661	1.43207	2.20801	0.661306		2.19737	3.11367	1.47702	2.10314	2.23735	-0.871653
MK03	0.0383148	0.0359811	0.974046	2.79499	2.75668	1.75561	0.799505	3	6	2.42585	2.07921	1.75215	3.18063	3.77928		3.36166	2.38715			4.78501	2.13469			1.46528
CGAT2	0.027418	0.0372456	0.975604	1.33266	1.30524	1.00018	0.408546	2	4	1.17109		0.800806	1.16229			1.71917	1.53869	0.625425						2.03989
PSIP1	0.0391789	0.0377312	0.972141	2.21053	2.17135	2.045	0.478498	4	7	3.18909	2.82664	2.24223	2.32294	1.96478	1.88078	2.57969	1.38235		5.18201		0.573982	1.81421		1.2719
SE1L1	0.0399948	0.0411079	0.968379	1.9339	1.8939	2.18493	1.02786	6	7	6.8708	1.60791	0.739885	1.92874	1.7975	0.76803	2.89492	3.52034	0.380643	1.54009	-1.00147	5.33578		2.7653	2.58304
SKIV2	0.0293686	0.0416004	0.969125	1.89005	1.86068	1.36398	0.364882	4	4	3.42719		2.03095	2.29021	1.61579		1.50577		2.26784	1.40366		0.332502			3.5562
NDUA7	0.0417586	0.0426832	0.966785	3.89423	3.85247	1.32833	2.15441	6	7	10.1148	6.43207	2.59623	0.563214	1.95461	5.50278	4.85389	5.06448		5.08937	2.38938	5.09692	2.20294	4.79527	3.79148
RAP2B	0.0256405	0.0429023	0.966486	5.9547	5.92906	1.09474	1.14097	7	7	11.9795	4.4179	6.32947	6.99881	5.56153	4.42609	6.91373	6.8559	5.0508	4.5864	4.81393	6.93444	7.18726	6.56575	6.54433
TPM4	0.0260192	0.0457892	0.964375	6.94733	6.92131	1.08474	0.942065	6	7	10.0532	6.60375	7.7856	7.04702	7.7856	7.38924	5.05701	6.78093	5.09177	7.37061	6.16773	7.59042		7.79971	7.66372
RM21	0.03446	0.047818	0.962936	3.73044	3.69598	0.724615	1.64818	4	7	8.74452	2.46761	2.21682	3.13911	3.88497	2.29139	6.28824	5.58373		3.20424		4.54423		4.13195	3.04135
SDHA	0.0224276	0.0479107	0.962576	6.26604	6.24362	0.885683	0.865718	7	7	11.9938	5.30874	5.46088	6.13186	6.62404	5.52871	7.34391	7.30718	5.19716	7.20561	5.56452	7.41303	5.41653	6.60223	6.46323
PDIA6	0.0152411	0.0504896	0.961076	7.75937	7.74413	0.255881	0.756561	7	7	7.35495	6.95969	7.44067	8.21155	8.53915	6.5804	8.1106	8.36683	7.35396	8.03418	7.57542	7.83112	7.61137	8.04343	7.86612
PTRF	0.021244	0.053827	0.958012	7.24379	7.22254	0.824151	0.641197	7	7	11.3159	6.58883	7.46793	6.38206	7.91267	6.75556	7.94736	7.50339	6.32769	8.33206	6.34876	7.54612	6.52844	7.77648	7.84695
SNG2	0.0453658	0.0589134	0.954417	3.7199	3.67454	1.35863	1.25161	5	7	8.28881	2.27464	4.06409	4.36868	3.03399	6.00669	3.06011	2.91354	2.89983		2.36057	5.24833		5.1213	2.96946
RLA2	0.0161426	0.0599843	0.953183	7.27228	7.25614	0.459149	0.544187	7	7	11.6695	6.76612	7.35608	7.02439	8.00301	6.44817	7.71846	7.47675	6.97949	7.70573	7.17978	7.53217	6.40406	7.50501	7.59974
HSDL2	0.0569896	0.0684223	0.946781	2.35181	2.29482	1.58031	1.39376	6	7	10.1353	0.990196	1.53951	1.46376	4.15666	0.839767	3.64384	3.43	0.835038	2.74884	0.591101	3.3988		4.70931	1.82777
K2C5	0.0886316	0.0701136	0.945522	4.21594	4.12731	2.36123	2.00313	6	6	9.74117	7.64165	2.43992		3.752	5.13412	2.3115	3.48465	8.91683		3.87366	2.59112	3.67178	2.71613	3.5261
ERGI2	0.0580695	0.0713123	0.944741	2.6552	2.59714	1.03213	1.66653	4	7	8.81491	4.41168	0.386644	1.93986	1.03988	4.9584	2.61827	2.82522	2.6579			3.5491		1.2082	3.20563
AKAP9	0.0145988	0.0719887	0.948127	7.42611	7.41151	0.224469	0.28224	2	5	2.42249	7.22082	7.84393	7.52202	7.33794		7.13283			7.58483	7.26739
AN32B	0.0536183	0.0755611	0.943067	4.96081	4.9072	0.964077	0.984172	3	5	4.41916		5.7874	5.8423	4.51143	4.92577	3.46907					3.94962	5.06322	5.8696
TARA	0.0779564	0.0791049	0.938255	0.893981	0.816024	1.88123	1.80533	7	7	11.9797	1.73906	0.583099	0.734712	2.97674	2.24133	-2.53517	-0.0275933	-0.962612	2.50781	0.396354	3.88079	-0.615595	-0.790447	1.84156
FERM2	0.0600315	0.0801583	0.937467	1.39713	1.3371	1.51058	1.28228	7	7	11.6916	-1.00416	1.99064	1.17137	3.14937	0.707748	1.56251	1.78222	-0.343	1.38195	-0.939922	2.54225	2.01687	1.92964	3.19213
SPB9	0.0859407	0.0821035	0.937714	2.35657	2.27063	1.81221	1.38651	4	7	5.05959	2.00425	3.24939	1.14898	4.85692	2.29964	0.9182	1.41702		2.56749	2.03191	4.61525		0.211623
TOR4A	0.0314643	0.0826935	0.936926	2.30746	2.27599	0.438648	0.634972	3	5	5.69188		2.93771	2.70142	1.42231		1.81439	2.50413	2.73		2.33807	1.85431
SYAM	0.049818	0.0834517	0.935915	0.709699	0.659881	0.912257	0.943349	4	6	6.74517	0.12576	-0.805995	0.560168	0.856574		1.33202	1.89076		0.072071		2.06123	0.418287		0.287204
PABP1	0.029666	0.0864162	0.933647	7.37095	7.34129	0.203653	0.881226	6	7	6.73961	7.5255	7.59485	5.36153	7.81677	7.598	7.8506	7.64177		7.27212	7.24607	7.27321	7.40057	7.26292	7.77084
ARFG2	0.0721059	0.0889115	0.931932	2.52632	2.45421	1.58531	0.880498	5	5	6.25341			2.27907	1.89039	3.89846	2.55871	1.64442		4.97238	1.14952	3.23537		1.4249	1.84942
ATPF2	0.0559017	0.0889495	0.93298	3.10864	3.05274	0.569821	1.12035	4	4	4.45476			1.85534	2.55591		3.32988	4.46983		3.07523		2.36582		3.25191	3.74162
NFS1	0.0393439	0.0900471	0.930924	2.52707	2.48773	0.687081	0.714273	4	7	6.59236	2.6355	3.86904	2.24574	2.57606	2.20541	1.50086	2.38149		3.53065		2.35207	2.24542		1.98015
YIF1A	0.147586	0.091769	0.933515	5.91337	5.76579	0.865759	2.57584	2	3	2.58669				2.79329		7.16179	7.34227				6.52556			5.30119
CPSF5	0.0667885	0.091784	0.929015	3.15315	3.08636	1.1629	1.23312	6	5	8.42431		2.52099	2.15621	5.23468		2.57402	2.94588		4.76527	1.49943	2.13969	3.36478	3.58872	3.56099
IDHC	0.0961301	0.0937468	0.927016	2.4416	2.34547	2.20576	1.57957	7	7	10.8724	3.31101	4.2396	2.53908	3.87226	0.0744759	1.55043	0.831454	4.24061	1.11926	5.78807	-0.0374071	3.9866	1.38596	0.608124
MYO1D	0.0569705	0.0962473	0.926339	1.69063	1.63366	1.16881	0.734842	5	7	6.24565	1.51008	2.56659	0.937961	2.10565	2.42653	1.12979	0.759007	-0.362165	2.0866		2.17361		1.98471	2.5704
MTCH1	0.0549951	0.0972918	0.924435	2.77396	2.71896	0.845355	1.11183	5	7	9.90759	3.40229	3.09112	3.91292	0.802894	1.60469	2.81946	3.39936		1.3305	2.76866	3.46812		3.08672	3.21579
STK38	0.0704429	0.0975994	0.92869	3.68548	3.61504	0.93672	0.675942	3	2	2.85766				4.093			3.13708		4.2086	2.60404				4.2438
SH3G1	0.0692856	0.0986064	0.924902	3.77494	3.70565	1.43727	0.75096	5	7	5.57085	3.01374	4.62269	4.42986	4.41865	3.15037	3.38662	2.91764		4.44308	5.48865	1.9258		2.69661	4.32055
GIMA1	0.0785632	0.100824	0.922545	4.43293	4.35437	1.74522	0.834741	6	7	6.93106	3.74353	4.68715	4.58422	2.78518	5.02452	4.45118	5.2048		2.31993	3.78312	6.41486	3.00314	4.55691	6.51963
CALRL	0.0619436	0.101374	0.921262	5.33103	5.26909	1.17269	1.00459	6	7	9.97843	4.38844	5.83705	5.75924	3.96881	4.53456	5.58063	6.8149		5.97663	6.90055	4.98117	3.49766	5.82088	4.80931
TRIPC	0.0582796	0.101818	0.922604	0.217558	0.159278	0.6987	0.908027	3	5	5.35681		-0.675552	-0.546008	0.365756		1.59152	0.0606726				-0.528956		0.325825	0.855805
LASP1	0.067167	0.102253	0.92035	5.2381	5.17093	1.37449	1.06355	7	7	11.2889	6.5523	5.48603	4.58423	3.99414	6.48766	5.0636	4.02856	4.11125	6.09402	6.51788	3.68465	6.50555	3.57013	6.18323
DEST	0.103188	0.102339	0.920194	5.32971	5.22652	1.97467	1.79372	7	7	11.8908	6.68442	6.85845	5.4622	4.96194	6.91659	2.49875	3.20332	6.46424	6.14394	7.3709	3.91078	7.23973	2.20097	3.97742
CRBB1	0.0570222	0.103696	0.920766	7.70482	7.6478	1.09729	0.656542	5	7	6.04381	7.45824	8.04065	8.18898	8.06723	6.30988	7.98183	7.48777	8.05139	6.80582	8.95006	6.3344	8.38243
STRN4	0.0905823	0.103978	0.923305	2.89756	2.80698	0.836329	1.2794	2	4	3.23362	3.76761		2.13219	3.98535			1.34277					2.30619		3.48894
NUCB2	0.0404498	0.104328	0.919471	6.04402	6.00357	0.947069	0.394117	7	7	8.0176	6.2298	5.34161	5.85445	5.82928	5.89576	6.40126	6.47283	4.6139	6.51474	4.78042	6.62427	6.23242	6.56098	6.9814
AINX	0.116737	0.108179	0.917189	2.8275	2.71076	2.11066	1.281	5	6	6.35364	3.46076	0.728043		3.16664	2.73904	4.35436	1.81573			6.60108	1.86506	1.9958	1.87333	1.80223
SF3B5	0.078684	0.108238	0.917499	2.35372	2.27504	0.464414	1.71903	6	6	5.726		1.28763	1.08266	4.72865	1.89228	4.09103	0.56796		2.92746	2.18909	2.91517	1.84733	1.97545	2.26782
ACL6A	0.0941594	0.109883	0.915792	3.17399	3.07983	1.95208	0.833257	6	7	6.55058	2.85676	2.65068	2.3933	3.69994	1.928	4.00964	4.0205		6.42045	2.99559	4.30228	2.34963	2.13757	0.838414
KDM1A	0.0811477	0.110717	0.927462	2.74256	2.66141	0.990725	0.481776	2	5	1.19545		1.9124		2.81533	2.49045	3.14712	2.94174		3.44311		2.04201
PML	0.0412786	0.112094	0.913321	3.17939	3.13811	0.879112	0.420025	7	7	8.60365	2.49391	3.51095	3.5783	2.97231	2.95166	2.88948	3.57019	1.43127	3.69945	3.50961	4.11365	2.76183	3.16778	3.57217
SRSF7	0.057659	0.113219	0.912521	7.70139	7.64373	0.558323	1.22628	7	7	8.38508	7.71969	8.21325	4.89523	8.17305	8.2452	8.0213	8.2384	7.86522	8.03883	6.45397	7.79657	7.96876	7.99181	7.79458
GAPR1	0.321981	0.114431	0.923224	3.88146	3.55948	1.62526	3.63222	2	2	1.385	6.12784					0.991111					2.73223		5.03069
NCKP1	0.0784119	0.118174	0.90843	1.41512	1.3367	1.5251	0.804986	7	6	9.34905		2.02802	1.64262	2.14543	-0.0417239	1.01565	1.23024	-1.03351	3.60151	1.8607	1.93729	0.13939	1.02265	2.37779
MYRIP	0.0536061	0.118375	0.916575	2.16762	2.11401	0.0164881	0.784099	2	3	2.00265				2.61706		2.51443	1.21055		2.17928		2.15596
RT16	0.140869	0.119747	0.909549	4.0253	3.88443	1.56935	1.83783	3	6	4.78355	3.77141	1.76193	4.64833	1.65995		5.79542	5.66952				2.21527	4.85472		5.00589
RN170	0.27149	0.120072	0.916479	5.18512	4.91363	1.84307	2.61303	2	2	1.79759			3.06593		6.76132					6.48837	3.88187
IMDH1	0.208597	0.121734	0.908874	2.08786	1.87927	3.16205	1.74821	4	7	4.07734	1.68437	4.58387	2.39032	2.45811	0.175142	2.61793	-0.754883			6.55165		2.11167	-0.141421	-0.170455
EPS15	0.120057	0.122046	0.904972	-0.461611	-0.581668	2.02535	1.63453	7	7	11.4878	-1.09593	0.199666	-2.10089	2.12851	-2.4475	-1.36205	0.606526	-2.08875	3.03183	-0.826997	0.983036	-2.3603	0.316314	-2.2864
RCN2	0.0976914	0.123403	0.90384	1.24159	1.1439	1.53114	1.42916	7	7	11.9434	-0.768914	0.976451	2.06154	2.53419	-0.677501	1.16437	2.71718	0.0626042	-0.296931	1.16917	0.837845	0.187002	3.41577	3.31569
DNJC5	0.0651835	0.125005	0.906995	3.0433	2.97811	0.757578	0.634812	3	5	3.71084		3.34993	2.9839	1.92177		3.06504	3.56992	2.64593			3.91689	2.56707
DCTN1	0.0819614	0.12553	0.902505	1.65427	1.57231	1.44369	0.948624	7	7	10.367	1.05877	1.32998	0.781038	3.53352	1.75464	1.71756	0.830635	-0.648706	1.93066	2.22088	3.14087	-0.0294332	2.04313	2.92247
LYN	0.0774547	0.127938	0.905611	2.48103	2.40358	0.916883	0.719567	3	6	3.29644		2.89642	2.95685	1.09004	2.93171	2.30135	2.24508		1.74304	3.50745		2.1926
FA65A	0.0915954	0.130009	0.912225	4.06329	3.97169	0.902022	0.518294	2	3	1.45345		4.32671				4.21143	3.37693		4.70111	3.42546
GFAP	0.144473	0.132055	0.89798	3.64765	3.50318	2.61281	1.24565	7	7	8.59347	2.61408	5.35046	3.33096	3.66317	2.98356	4.82146	1.75854	4.90847	2.50867	7.45275	0.635264	6.40968	1.55151	2.0672
GANAB	0.0589007	0.132977	0.896463	5.38283	5.32393	0.887834	0.764929	7	7	11.7431	4.71252	4.86931	5.01348	6.29473	4.45638	5.55547	6.36562	4.277	5.51069	4.37032	5.97011	4.89035	6.53174	6.12962
DNSL1	0.136419	0.136523	0.896215	2.99299	2.85657	2.38195	0.608311	6	7	5.56018	2.35841	3.65538	2.44291	3.78603	2.54931	2.79553	2.40843		0.499556	1.27702	5.36978	0.759449	4.63752	5.41462
SCOT1	0.10214	0.137059	0.893365	3.15436	3.05222	1.53938	1.232	7	7	11.4502	4.29636	3.46789	1.14683	4.0752	1.53863	3.14886	3.6918	0.754737	5.44056	3.34742	4.19335	3.26844	3.35769	1.71835
AP1S1	0.156685	0.154546	0.888296	3.87847	3.72178	1.63824	0.965879	3	7	2.6209	3.16439	5.30677	4.47843	2.29503	3.41476	3.88494	3.50816				2.82418		3.0454	5.76583
GXLT1	0.180829	0.159469	0.877289	2.69859	2.51776	1.47334	2.11161	4	6	7.92515		0.774002	2.2657	1.6915	6.70336	2.00716	1.66482			2.15746	1.28184		2.60616	4.74888
TMEDA	0.0536417	0.160569	0.875796	7.28853	7.23489	0.43611	0.768789	7	7	9.49918	7.35199	7.48826	5.58729	7.14646	7.42069	7.73691	7.91265	7.65409	6.95124	6.90078	7.65306	6.66447	7.47666	7.71944
LGAT1	0.0967264	0.161439	0.878738	1.5196	1.42287	0.293379	1.29897	4	5	4.50196		-0.328469	2.18561	0.456429		2.04321	2.75759			1.5047	1.15668		1.54284	1.8742
PTPA	0.092982	0.173995	0.869526	2.64162	2.54864	0.181055	1.16014	2	5	4.43615	1.50084	3.99124	3.03644	2.9954			1.21928			2.5136		2.76965
MSH2	0.172573	0.175373	0.87198	1.23755	1.06497	0.775285	1.4154	2	3	2.9929				2.17904		1.54356	-0.527679				0.689338		1.78576
CCDC6	0.230785	0.180384	0.883978	2.98612	2.75534	1.76011	0.726238	2	6	1.116	1.86799	2.73947	2.89241	3.99732		2.81317	2.22165		4.2307		1.74154
BPNT1	0.261688	0.182232	0.860196	2.68747	2.42579	2.01615	2.50509	4	6	7.55283	0.891771	5.27866	2.3018	0.872852	5.63749		-0.427863	1.34334	1.01325	5.42743		2.96587
MA1B1	0.177533	0.184961	0.878316	1.1143	0.936763	1.27512	0.570065	2	3	1.27295			0.553855			0.664524	1.59191						0.212647	2.01594
CHD2	0.225579	0.186747	0.856803	0.216114	-0.00946541	2.13926	1.649	5	5	7.51312		-1.53497	-1.28009	-0.770683		1.65016	1.88826		-1.12405	-1.25946	1.1322		-1.25158	3.58346
IF4A2	0.145907	0.191111	0.854648	4.66185	4.51595	1.51954	0.920668	5	7	6.09343	4.4649	5.53685	4.66224	5.53007	4.75782	3.08591	3.57383	5.57993	3.72065	5.50044		6.05296		2.45531
GPX3	0.335572	0.191975	0.860233	5.48985	5.15428	2.73708	1.97686	3	7	2.94514	7.0263	4.7498	6.29267	5.95487	6.72936	3.87875	1.44821			7.28072	2.33916	6.84968
RBBP7	0.142618	0.192318	0.852969	3.17483	3.03221	1.40922	1.03405	5	7	6.98008	1.79518	2.90085	1.57151	4.41463	3.42087	3.79847	3.324		2.21427	1.41008	5.05898		3.5585	3.63233
TSN14	0.173646	0.197233	0.849283	6.68102	6.50737	0.864247	1.77676	3	6	6.95706	7.63652	7.24557	7.57318		7.61788	5.79317	3.17792			7.5407	5.81228			6.69008
CSN4	0.196126	0.198119	0.846833	2.12471	1.92859	2.1628	1.36764	7	6	10.2318	-0.135292	2.48983	2.70531	3.68926		1.93033	0.892084	2.39192	3.49948	6.06371	0.887768	1.16186	1.53317	-0.664935
RRAS	0.122768	0.198255	0.847163	4.6736	4.55083	1.44391	0.774185	7	7	9.18644	3.77138	4.82425	3.60496	5.01006	4.03031	5.75041	4.86448	1.51844	4.96557	4.7634	5.91896	4.93933	5.15877	5.45074
GOLI4	0.254517	0.201349	0.871348	3.47063	3.21611	1.74885	0.693019	2	7	1.09138	3.32677	3.07523	4.02785	1.87635	2.96184	3.6009	3.64385			2.23401	4.70726
PDIA3	0.0313416	0.206256	0.841415	7.90875	7.87741	0.171854	0.363453	7	7	8.55517	7.55177	7.94936	7.91898	8.27736	7.25351	7.96247	8.2284	7.58874	8.09324	7.8084	7.96631	7.86241	8.02231	8.01982
TAF6	0.132165	0.210175	0.847943	1.42727	1.29511	0.563551	0.997869	5	3	2.78767			0.251724			2.24019	1.39341		1.24888	1.19195	0.716366		1.83894	2.14023
PROF2	0.209447	0.218033	0.83476	5.62939	5.41995	1.93227	1.11014	5	7	5.89024	5.29939	5.33753	4.92024	6.90484	6.89899	3.99413	4.58451	6.43234	2.85543	7.43712	4.42383	6.99826
CLAP2	0.226411	0.21841	0.835841	0.91221	0.685799	1.05773	1.67532	3	4	4.94224		-1.25746		-0.0854018		2.4702	1.61586		2.02867	0.78284		-0.0748801
NSE2	0.354535	0.225589	0.837611	3.40117	3.04664	0.917296	2.47944	2	3	2.67963				1.61228	5.90965	1.618				4.0498	2.75255
RPR1B	0.204654	0.226825	0.833066	2.18493	1.98028	1.73016	0.62789	4	6	3.53359	1.79738	1.86793	1.28462	3.16656		1.96877	1.7964	2.10746	3.62367	3.23315	-0.224551
KAD3	0.15728	0.228046	0.824959	3.28754	3.13026	1.43328	0.965927	6	7	8.56856	3.46779	2.95451	1.3647	3.2552	2.88558	3.36941	4.61465		4.47769	0.892644	4.62509	3.0174	2.56627	4.14617
SCO2	0.115682	0.230185	0.828214	3.56751	3.45183	0.166943	1.09232	2	5	4.42051	4.67976	4.5806	2.95372			2.43482	2.61025				3.68556			3.44947
RBM12	0.147689	0.232204	0.825375	1.2431	1.09541	0.976412	0.800989	5	3	5.12086	0.520801			0.755058		2.01037		1.0674		-0.303141	2.33372		1.51969	1.59782
ODPB	0.131009	0.233017	0.819694	6.19409	6.06308	1.01497	1.08746	7	7	11.9433	5.8253	4.85328	6.17312	6.61627	4.48935	7.23005	7.25418	6.66519	7.34087	5.63751	7.21775	6.52443	5.34722	4.62567
APMAP	0.098361	0.233086	0.82071	6.31652	6.21816	0.976707	0.540925	7	7	9.36417	5.47645	5.93886	6.64904	6.13061	5.72829	6.72273	6.88116	6.55077	6.07493	6.12202	7.40028	4.36556	6.95216	6.74996
SMD1	0.173225	0.238928	0.831772	4.02849	3.85526	1.22885	0.394915	3	7	2.17954	3.93822	3.30232	3.91788	4.09963	4.34571	3.3273	4.05576		3.51501		5.43079		3.13966
H1X	0.321308	0.239163	0.834909	4.71889	4.39758	1.62121	1.85343	2	7	1.84345	6.21917	4.03885	3.69652	3.07604	7.7125	2.75339	3.28661		5.86526			3.57252
ARL8A	0.240454	0.239539	0.842404	2.97015	2.72969	1.32188	0.968383	2	7	1.32499	2.38673	2.65672	4.321	1.58172	3.7361	1.98225	2.44332			3.90486	2.03543
PSA3	0.170048	0.240162	0.814261	4.68658	4.51653	1.34246	1.30659	7	7	11.9912	3.33322	5.53438	4.19065	6.66389	5.05023	3.87285	2.97048	5.0938	3.89225	5.33473	2.95759	7.07117	4.72853	3.72796
DGLB	0.165576	0.240211	0.82199	0.829613	0.664038	0.828909	0.859235	3	3	3.99485		0.169825				1.65619	0.166093				-0.126938		1.27881	1.33697
PAXI	0.106359	0.242103	0.814321	2.74262	2.63626	0.73042	0.721379	6	5	8.68375		3.80675	2.73212	2.50713		2.20731	1.928		3.43006	2.98736	2.00249	3.6843	2.00569	2.34581
SC11C	0.128483	0.245722	0.816012	2.42531	2.29683	0.681539	0.769976	3	5	4.82217		1.96662	2.18417	1.23781		3.03474	3.06082			2.12111	1.94885			3.20598
RM10	0.175622	0.247451	0.811692	4.28554	4.10991	0.964854	1.16399	4	5	6.96812	5.40967	4.44247		2.21852		4.30497	4.17395			5.66027	3.40186		4.06722	4.0128
UXS1	0.0885052	0.247576	0.817012	1.77428	1.68577	0.3362	0.653979	2	6	3.87917	1.36684	0.678616	2.15685	1.37236		2.17103	2.36896				2.01201			1.53655
TPM1	0.25651	0.248903	0.807707	6.37853	6.12202	2.0429	1.80581	7	7	11.8219	7.03713	7.70759	7.03576	7.46174	6.48437	3.13707	3.9905	3.63778	3.46083	7.53381	7.47223	7.61736	8.60285	6.32487
EXOS8	0.20262	0.251826	0.824415	1.58402	1.3814	0.93644	0.91417	2	4	2.02667		2.53194		1.63913		0.426917	0.927628		2.24619		0.921861
CALB2	0.390766	0.25629	0.807333	3.26727	2.87651	3.15634	1.41184	5	6	5.3266	1.40287	4.11372	1.74457	4.46868		3.86524	1.66396	3.63745	0.619573	7.73561	-0.101548	4.44528
RNBP6	0.173623	0.259845	0.801044	0.599721	0.426097	1.09827	1.10966	5	6	8.67689	0.242738	-0.163661	-0.965937	0.734149		2.3592	0.350097		1.65616	1.7832	-0.783838		0.0549226	0.288163
MGP	0.196014	0.260386	0.801144	6.6509	6.45488	0.91179	1.46732	4	6	7.99769	6.87741	6.49083	3.57198	7.43103		6.80984	7.54823	8.00329			6.18169	6.37508	6.04354
ALG1	0.171797	0.261839	0.800455	1.08312	0.911318	0.678941	1.39207	3	7	7.5402	0.498917	-0.398717	0.94523	-0.702591	0.657171	3.30024	2.07898	0.781682	0.607083		1.86058
PCP	0.277001	0.263921	0.797108	3.21841	2.94141	2.34258	1.49109	7	7	10.1763	1.88091	3.96635	1.80866	4.64255	0.669805	3.41324	4.20834	0.100074	4.94767	1.02106	5.07334	1.11091	5.39502	4.88079
VPS35	0.130699	0.264143	0.796519	2.37783	2.24713	0.780924	1.05071	7	7	11.079	2.22494	1.96018	2.82406	3.73019	0.252394	2.37254	2.36563	3.02608	3.15694	3.36344	1.93992	1.85717	1.38613	1.91517
PALMD	0.23662	0.267436	0.794278	2.03909	1.80248	1.56258	1.61372	7	6	10.5745		2.75069	1.05021	3.86485	-0.875334	2.1596	1.86483	-0.214487	4.45776	1.08907	3.55087	1.39126	2.23456	1.76462
PTN11	0.163691	0.268964	0.796574	1.66191	1.49822	0.622169	1.16966	4	5	6.28204		3.1749	0.249117	1.50561		1.99006	0.571437		1.54761	2.5723	1.29959	1.22816
PP4C	0.225522	0.268992	0.796719	2.08179	1.85627	1.64857	0.892622	5	5	6.15975		2.72252	1.11273	2.9196		1.42111	1.10538		5.02744	1.39187		1.35988	1.21305	1.4167
MYH14	0.116987	0.269103	0.794358	5.69772	5.58073	0.911688	0.594326	6	7	8.37949	5.9546	6.46019	5.05973	6.1555	5.28388	5.02124	5.12999	7.32718	5.90413	4.89573	5.06253	5.9058		5.09094
YTDC2	0.0751505	0.269542	0.805205	1.32089	1.24574	0.287587	0.426504	2	5	2.96065		0.750805	1.03427	1.89744		1.19648	1.34971		1.52425		1.11754
GCDH	0.15113	0.270529	0.798666	2.79108	2.63995	0.999236	0.612224	4	6	4.51962	1.74037	2.40807	2.45882	3.24634		2.56806	3.41802		4.12408	2.79897	2.52029			1.72096
THOC2	0.188219	0.275951	0.790595	1.02127	0.833048	0.9295	1.11632	4	5	6.96375		1.15075	-1.13167	1.58542		1.11104	1.4497		-0.253591		0.919524		1.64332	1.77581
DYLT3	0.729104	0.276894	0.822581	5.00328	4.27417	1.64657	3.57526	5	2	1.17477				6.80226			1.74608		3.20841	5.4228	6.94065		6.05189	3.39264
QCR1	0.0720745	0.279135	0.784901	6.89198	6.8199	0.492665	0.473261	7	7	11.9807	6.24408	6.61604	7.11808	6.98395	6.18578	7.29283	7.29857	6.56006	7.43691	6.91578	7.28916	6.00747	6.82082	7.21364
DCTN2	0.276606	0.280064	0.78531	3.45534	3.17873	2.25313	1.32348	7	7	9.69992	1.84431	4.23871	2.87655	5.38553	1.64327	3.50683	2.75592	1.2058	6.87341	1.26171	3.86032	1.53155	3.77772	5.67684
QCR6	0.106437	0.282291	0.78254	7.54044	7.43401	0.721478	0.68892	7	7	11.9745	6.53661	7.47331	7.90388	7.19594	6.60516	8.25551	8.06763	7.87203	6.47277	8.13615	7.9892	6.51894	7.79871	7.9953
RAB2B	0.249716	0.284494	0.787749	1.40586	1.15615	0.968002	1.52715	5	4	4.86178		1.90815	-0.230012			0.00548966	2.94096	2.36499		-0.066618	1.0883	1.49427	2.14838
CYTB	0.0744948	0.286198	0.783723	7.49793	7.42344	0.509041	0.333897	5	7	6.43141	7.30112	7.17515	7.48912	8.0387	7.50613	7.4773	6.97653	7.92931	7.99564	6.74139	7.49952	7.32379
CNOT7	0.245136	0.287151	0.781591	2.26271	2.01757	1.20408	1.48124	5	5	7.67963		3.8116	2.96995	1.44668		1.91935	-0.0597185		4.28395	2.41457	1.62169		1.26621	1.72712
K1C10	0.295104	0.288678	0.77807	3.81965	3.52455	1.65078	2.14244	7	7	11.2676	7.25394	2.41274	1.90446	4.13737	5.36303	1.61518	1.9851	5.40953	1.27112	3.02406	3.50184	4.14947	6.26672	3.11482
BT3L4	0.0661302	0.289722	0.798155	5.00306	4.93693	0.0505879	0.390463	2	3	2.09932				5.35418		4.87626	4.58036	5.03884					4.96729
BCAT2	0.275744	0.291516	0.777953	3.3076	3.03186	2.00668	1.25107	6	7	8.13423	2.0765	1.83596	2.64451	4.64123	1.73975	3.84985	4.43519		4.49367	0.0558355	4.94025	1.55144	4.4617	4.3427
RT24	0.454125	0.295648	0.787986	2.63029	2.17616	2.43617	1.63328	3	7	2.80999	1.31136	4.29086	0.403006	0.484413	1.46701	3.66564	3.61085					0.777725	1.72329	5.38985
PSME1	0.181201	0.300254	0.770251	2.89393	2.71273	1.17161	0.97364	6	7	9.80764	1.21364	3.67847	1.9368	4.00505	3.08881	2.65538	2.41099		1.87217	5.04107	2.56495	2.18127	3.39499	2.30916
DNJC9	0.159161	0.301378	0.777455	1.96847	1.80931	0.119803	1.1656	2	5	4.20235	0.50968	1.63831		1.30686		3.66685	1.92483	1.88376		2.05318
AT5SL	0.331283	0.303271	0.786304	0.951741	0.620458	1.22447	1.63146	2	6	2.36785	0.00196173	1.42036	0.494484	-0.705512		3.45854	-0.947094					1.81757	0.0859133
CPSF6	0.218754	0.303824	0.771883	3.88475	3.66599	0.314998	1.67713	2	6	5.79005	3.4387	5.87869	1.90094	5.2647	3.70259		1.81033		4.10748	3.66201
UBC12	0.593284	0.30528	0.785576	3.35302	2.75974	3.24785	1.35082	3	7	2.30332	4.04649	4.70479	2.23776	3.55682	1.37994	1.22957	2.16278	2.07186	0.941145	7.04605
HMGCL	0.214618	0.30637	0.767277	2.89028	2.67566	1.71864	0.642339	7	6	7.86434		2.25334	2.44669	3.5277	2.15306	2.21156	3.46162	1.90994	4.12621	3.40253	5.24288	0.0633666	3.58079	1.90624
PCKGM	0.331225	0.306392	0.767134	2.66097	2.32974	2.62979	0.95053	7	5	7.99438		1.77904	2.36196	3.77965		1.24206	2.48599	-1.02538	5.37473	3.10268	5.45153	-0.666232	2.51696	3.87248
ADPGK	0.162262	0.306746	0.76432	4.11255	3.95028	0.954258	1.02378	7	7	11.9411	2.72579	3.50424	4.7925	3.71016	2.79906	5.19167	4.92858	4.87754	3.06466	3.74015	4.87262	2.65604	4.66806	4.90876
RPAB1	0.208206	0.307785	0.766126	4.42338	4.21518	0.801673	1.33477	4	6	7.98056	5.75477	3.22758	2.46321	4.93382	5.42039		3.49129		5.47282	4.0023	3.63382		4.5846
EPHB4	0.225379	0.308402	0.764172	1.26206	1.03668	1.41069	1.19027	6	7	9.89385	0.594226	0.735914	1.47834	0.470161	-0.898121	2.32276	2.5535	-0.954662	2.77417	0.7422	2.8136	1.19556	1.00149
ANAG	0.26824	0.30953	0.77789	2.70128	2.43304	1.3076	0.601778	3	2	2.88939		2.85856	2.00752						2.32689		1.62172			4.15524
GLOD4	0.255573	0.312143	0.766071	2.66025	2.40467	1.65742	0.777738	5	5	5.68008		2.45273	2.95454	2.0351	3.27847		1.30253		1.12681	1.69722		1.83392	5.1894	3.45389
IVD	0.271267	0.312614	0.762055	1.08185	0.810585	2.07512	0.982162	7	7	8.55975	0.493747	0.894545	-0.129957	0.580213	0.0575885	0.927249	2.85071	0.151119	1.92579	0.0547488	4.77107	0.308786	-1.73907	2.10052
CAND1	0.226497	0.313032	0.760078	2.61523	2.38873	1.53786	1.14007	7	7	11.0651	0.893286	3.48623	3.01579	3.60881	0.971766	2.85613	1.88909	3.35593	0.499492	4.69828	1.34234	4.22648	1.91569	2.26838
PARK7	0.101931	0.313114	0.762145	5.22548	5.12355	0.793944	0.333895	7	7	8.058	5.02324	4.90801	5.59317	5.25662	5.03384	5.44134	4.60866	5.73238	5.5568	6.45721	4.2352	4.92028	4.32615	5.35037
K2013	0.104591	0.31349	0.764702	2.10697	2.00238	0.363671	0.579768	3	5	5.89563		1.26847	2.06431	1.56737		2.56283	2.54893	2.07352		1.76118	2.48621
SPB6	0.19924	0.315377	0.766185	1.90134	1.7021	0.85375	0.967933	3	6	4.63161		1.59638	2.16329	3.39673	0.773095	0.920937	1.36216		1.9678		2.71992		1.0163
CYB5	0.197272	0.3166	0.757285	6.7686	6.57133	1.29572	1.01924	7	7	11.3694	7.16787	7.14585	6.94062	7.14426	4.3688	6.95318	6.27874	4.41704	7.69963	6.78557	7.75952	5.67994	7.95642	7.08211
MA2A2	0.333866	0.316802	0.762128	0.330762	-0.00310453	1.49556	1.48521	4	4	5.99971	0.111898		-0.516316			-1.57341	1.96541				2.57081	-0.313429	-0.511143	-0.423194
LYAG	0.333769	0.321158	0.754755	2.25617	1.9224	2.20671	1.3864	7	5	9.9197		0.524143	0.855702	3.22525		1.44923	3.55769	0.536898	4.21968	1.48168	4.86556	-1.06148	4.14499	1.60587
MAON	0.191732	0.323524	0.775172	1.92983	1.7381	1.00864	0.190552	3	3	2.14258				1.94799		1.69033	1.57598		1.25745		3.0896			1.44246
PGH2	0.469331	0.326642	0.76268	2.55231	2.08298	2.76822	0.862407	4	5	3.46828		3.30786	2.34585	2.13107		1.64959	0.980525	6.53077		2.34681	0.642248		0.689419
ANXA1	0.0781824	0.328605	0.749214	8.00671	7.92852	0.331985	0.534821	7	7	10.0261	7.09263	8.03355	8.17393	8.41317	7.2402	8.26606	8.28012	8.4658	8.11321	7.80858	8.02517	7.39527	8.13169	8.10722
USE1	0.284033	0.332412	0.747214	3.36983	3.0858	0.924417	1.97848	5	7	8.97107	2.97143	0.91093	3.40367	1.3005	6.99686	3.27915	2.73802		4.85471	2.6178	2.56758		3.37489	3.43416
RB22A	0.297081	0.34071	0.745867	-0.741787	-1.03887	0.350252	2.07759	3	6	5.53983		-0.956418	-2.20187	-2.95444	1.76405	-3.02532	1.14078			-0.364532	-1.05665		-0.804179
CLH1	0.138444	0.341545	0.738816	6.45594	6.3175	0.828242	0.681292	7	7	11.5696	5.71908	5.86208	6.01372	7.04873	5.54144	7.077	6.96042	5.67811	7.34525	5.82381	6.8221	5.30507	7.17885	7.0384
AT8B1	0.248423	0.344803	0.737443	1.21031	0.961884	0.960076	1.53074	5	7	9.91685	-1.02057	2.04021	1.06529	1.00735	-1.01487	1.5174	3.13837	1.0701			0.458825	1.5073	0.316526	2.69878
MRP4	0.46233	0.345557	0.748341	1.25969	0.797358	2.53212	1.14456	4	7	3.71609	-0.706169	0.567011	1.99899	1.60202	-0.791834	1.63255	1.27893			-1.21129	4.19805	-0.454864	2.50686
K1C9	0.535884	0.347179	0.735033	3.76646	3.23058	2.40127	3.30325	7	7	10.9571	7.52986	5.4677	4.13638	1.93419	5.12268	0.552281	-2.12905	7.47425	4.94169	5.01857	2.40356	4.52242	1.31098	0.693758
ARAP3	0.27995	0.347219	0.739505	0.792532	0.512583	1.52791	0.855934	5	4	6.43371			-0.533873	0.175138		1.07935	1.32972			0.101865	0.786212	0.564671	-0.792163	3.30208
GMPPB	0.420151	0.348129	0.739635	4.09059	3.67044	1.22002	2.19136	3	5	5.99856		5.89317	5.2822	4.41122		0.810679	1.95494		3.30717	5.49628	3.46833
TPP2	0.343191	0.34815	0.742779	2.05654	1.71335	0.626748	2.11324	5	5	4.69828		2.75288	0.776824	4.20723	2.19169		-1.36189	2.58484		1.0721		2.54218	1.83353	2.25006
PEBP1	0.159369	0.348845	0.734376	2.39916	2.23979	1.02389	0.642359	7	7	10.0896	1.67936	3.23346	2.30165	3.02267	1.88828	1.72733	1.82579	0.748778	1.29613	2.40939	3.23155	3.57549	2.72656	2.80623
THEM6	0.313322	0.351222	0.736061	3.79641	3.48309	2.01025	0.925283	6	7	6.79411	2.69601	3.63863	4.33645	2.81715	4.1891	2.17131	4.53299		2.51145	3.08871	6.41174	1.54902	3.05266	6.16491
SCAR3	0.632897	0.352097	0.755495	5.22366	4.59076	0.900524	3.03423	5	3	2.21389	6.41598			1.08818	6.26813				5.38936		5.95933	5.19806	5.85604	3.7155
CS025	0.410417	0.353863	0.776096	2.96259	2.55218	1.57189	0.740846	2	5	1.18327		3.2467	3.34424	1.77996		2.5372	1.85278		4.07409		1.8511
ALDOC	0.323722	0.354696	0.733119	4.26594	3.94222	2.02882	1.01425	6	7	7.10011	2.80193	4.65038	4.03904	5.25656	4.61221	3.76	2.47542	4.59601	3.59699	6.86691	1.89575	6.27388	2.36611
NDUS1	0.15535	0.354885	0.728901	6.08404	5.92869	0.860652	0.775009	7	7	11.8705	5.93464	4.82953	6.03429	5.28139	5.62756	6.91517	6.87825	4.93329	7.1473	5.6042	7.10675	5.27698	6.2703	6.24946
CMC1	0.356876	0.3577	0.733835	2.23746	1.88059	2.04592	1.05248	5	7	5.52355	0.975133	1.12301	2.98193	0.620506	1.78394	2.29106	3.38852			3.25307	4.63484	-0.878393	1.76363	2.41417
EIF3J	0.825326	0.360367	0.744524	5.98839	5.16306	2.38749	3.09525	2	4	2.7416		4.85125		7.49131	7.4099		0.8998				4.30018	7.6766
HYEP	0.239289	0.361423	0.729469	4.00919	3.7699	1.52044	0.609382	6	7	6.371	4.20903	3.70246	3.64282	3.38021	3.36404	3.1661	4.92463		4.19404	4.70867	5.3941	1.12984	3.74831	4.88016
CAPZB	0.0693565	0.362682	0.725001	7.77313	7.70377	0.444933	0.24088	7	7	9.23894	7.56764	8.05623	7.43097	8.01176	7.719	7.55817	7.58265	6.79939	8.1313	7.75897	7.84951	7.91262	7.96975	7.99037
TM245	0.480229	0.364162	0.72918	5.0757	4.59547	2.21305	1.89801	4	7	5.56071	6.60405	4.81464	5.36948	1.94595	7.00136	2.81567	3.61713		1.90475	6.37317	6.78687			5.238
CC50A	0.223096	0.364243	0.724788	3.52709	3.304	1.0803	0.996069	5	7	8.29401	3.45308	2.70558	2.29229	2.19777	3.29468	4.64613	4.53847		2.60879	2.18478	4.15887		3.95589	4.72714
AT11A	0.359896	0.364905	0.739061	0.690265	0.330369	1.53026	1.15983	3	7	3.0445	0.634099	0.997955	-0.416287	-1.91135	1.63205	0.676706	0.699412			-0.953422	2.07372		0.950496
NUP58	0.180452	0.366641	0.726553	2.66571	2.48526	0.520181	0.871899	3	5	5.95919		2.65222	0.945548	2.85167		3.01697	2.95989		2.45533		3.25813		2.28367
NDUAC	0.308652	0.368697	0.719643	4.4481	4.13945	1.53045	1.47411	6	7	10.5528	4.67365	2.56473	4.06242	1.74453	4.84488	5.32638	5.75957		4.43785	2.35602	5.30373	2.8729	5.59503	6.1231
SYIM	0.25328	0.369103	0.718496	2.70383	2.45055	1.31427	1.25253	7	7	11.9723	1.06375	2.67656	1.43052	3.24518	1.08456	3.5882	4.06504	3.55089	2.50916	1.90552	4.7563	0.547698	3.02672	2.6305
RAB2A	0.140599	0.369752	0.7207	7.49919	7.35859	0.419267	0.914524	7	7	8.41545	6.41111	7.72501	8.19706	7.53451	5.76915	7.76709	8.10623	7.50718	7.45425	7.43541	7.9387	6.99027	7.04486	8.12367
TPPC4	0.274557	0.373412	0.721682	2.07749	1.80293	1.0467	1.0329	4	4	5.99894	3.32401			1.4471		1.42209	1.01853			1.16947	1.68344		1.87435	3.58271
DEGS1	0.213228	0.373774	0.728055	4.96462	4.7514	0.815206	0.720824	3	5	3.88869		3.7972	5.21581	4.21993		4.98978	5.53427			4.60287	4.3929			5.8981
CD109	0.28149	0.373892	0.715927	1.41236	1.13087	1.3157	1.38458	7	6	10.4956	-0.745088	0.88269	3.55973	0.978541		0.867097	1.24227	2.91406	1.80789	1.22727	2.44623	-0.912242	0.371277	2.03205
ARL3	0.531002	0.375202	0.727204	3.71276	3.18176	2.64942	1.21997	4	6	3.86177	1.63887	3.92787	4.71251	3.24257		3.74399	1.82474	4.22765		7.20743	1.18732	2.22864
PODXL	0.13229	0.375862	0.715017	6.5678	6.43551	0.68307	0.568156	6	7	9.81274	6.3936	7.23042	6.88232	5.79764	6.86952	5.85902	6.01607		6.42329	5.87598	5.74637	6.71871	7.33861	7.30385
PUF60	0.273798	0.376617	0.713804	2.43203	2.15823	1.08967	1.5213	6	7	10.7225	-0.175332	3.6454	2.06499	4.23732	0.804528	2.41057	2.12015		2.34942	4.33045	1.99145	2.09884	2.77067	1.05134
SNAA	0.178524	0.377955	0.712986	5.09327	4.91475	0.697745	1.03678	7	7	10.5099	3.60259	5.36097	5.53757	5.42632	3.22276	5.66465	5.58837	4.39702	4.66984	4.19008	5.2866	5.31439	6.07286	5.72209
TX1B3	0.171265	0.385482	0.717799	4.52542	4.35416	0.801128	0.47079	4	6	4.40044	3.57435	4.30719	4.08508	4.83771		4.70634	4.61426		5.08684	4.99637	3.35519	4.66328
TB182	0.225789	0.386333	0.712199	0.7276	0.501811	1.15791	0.716898	5	7	6.18136	0.441824	0.00565823	-0.488518	1.3412	1.51844	0.53024	0.163835		-0.255432		2.65097	0.458924	0.838741	-0.0552026
GDIA	0.461909	0.389375	0.708443	2.83622	2.37431	2.62196	1.14343	6	5	7.08155		3.19672	1.28108	3.88835		2.13552	1.36988	1.26355	0.775769	6.13221	1.82617	6.23592	0.783687
GLRX3	0.415274	0.392433	0.703087	1.48406	1.06879	1.72037	1.93884	6	6	9.8604	-2.28403	2.44953	2.38662	2.83076		0.825503	0.204322	2.52353		4.09876	-0.99645	1.14015	1.43364	0.704723
SDF2	0.180806	0.398751	0.703191	5.91816	5.73735	0.891654	0.571078	5	7	6.32539	6.27481	5.54889	4.93918	6.48949	5.1207	5.90319	5.88519		7.09329	5.40188	4.7399		6.10874	6.24697
RAB21	0.309465	0.400053	0.698504	3.45144	3.14197	0.932757	1.82174	7	7	8.9436	0.566217	3.07419	4.83175	3.75417	0.673653	4.50957	4.58426	3.21403	1.91446	3.97391	3.76138	2.57997	4.23828	4.47804
DAPK3	0.230614	0.400174	0.710236	5.24198	5.01137	0.831773	0.780342	3	6	3.84945	6.27959	4.15335	4.32213	5.13132		4.77626	5.40555		5.6801		5.76311			4.28273
SYDM	0.28504	0.404723	0.695215	0.751882	0.466842	1.23018	1.10407	6	5	8.92001		0.802956	0.195796	-1.24964		0.856944	1.72816		-0.233921	0.492287	2.38674	-0.766175	1.99197	0.640388
MYADM	0.214663	0.40665	0.698579	2.91651	2.70185	0.479844	1.00476	3	5	5.91081		1.62019	4.23725	2.24006		2.3202	3.09152				2.70595	3.46563		2.57794
SUMF2	0.322594	0.413869	0.686964	2.35823	2.03564	1.47296	1.33629	7	6	10.945		2.76943	1.289	3.39235	0.0295284	1.43188	3.30163	-0.128841	4.62425	2.55885	3.13943	1.56546	2.83127	1.91718
SURF4	0.250156	0.41529	0.68716	6.1151	5.86495	0.746724	1.37454	6	7	9.49261	3.98645	6.44954	7.05497	6.00758	3.85545	7.00714	6.69351	4.95515	5.65432	6.11062	6.66887		6.23281	7.06885
ARSB	0.417099	0.416275	0.725175	3.09163	2.67453	1.23692	0.846717	2	3	1.64224				3.62323		2.40492	1.99545						3.96627	2.217
AGFG1	0.579891	0.418706	0.742437	2.47706	1.89717	1.91212	0.734876	2	6	1.10036	2.41703	2.10875	1.40869	1.66974		2.91283	0.866007		1.12499			3.82914
CRBA2	0.241639	0.425231	0.679536	7.27955	7.03791	1.07629	0.953367	6	7	10.1581	7.52314	7.23147	7.68183	7.6864	7.4229	5.01681	6.70284	7.93223	6.46074	8.43834	5.80726	8.25084		6.78791
PFKAL	0.252048	0.425717	0.680224	1.3454	1.09335	0.729124	1.38639	7	7	9.08318	-0.563593	0.685326	1.27738	3.03251	-0.69963	1.7296	2.19188	0.878523	1.94292	1.03217	2.27075	0.387905	0.852564	2.05297
SNX17	0.344731	0.429626	0.712184	1.40765	1.06292	0.963452	0.947948	2	5	1.85487		0.101731	0.116239	2.10178		1.89587	1.09899				0.726389	2.08892
IDE	0.275087	0.437711	0.679053	1.20533	0.930241	0.564827	1.30729	6	5	5.23987		1.99158	2.27864	1.21838		-0.127962	-0.709438	1.82606	0.239483	1.0241		1.68484	1.14777	1.30972
HS74L	0.68718	0.439096	0.699171	3.22753	2.54035	2.63039	1.00002	3	7	2.25257	2.19404	4.37507	2.25931	2.59284	3.2213	1.36334	1.77657		0.473838	5.71427		3.49449
NSF1C	0.350178	0.439871	0.671168	2.31517	1.96499	1.39734	1.30489	5	7	8.37012	1.27723	3.21799	2.92943	2.91705	2.74056	0.80021	-0.127541		3.34596	-0.0172961	3.37972		2.16359	2.70386
MXRA7	0.363611	0.443109	0.67106	5.17196	4.80835	0.767199	1.69205	3	6	6.9989	6.81471		3.63811	2.28103	6.00879	5.75065	4.35682				5.26465		4.36263	5.88861
CNN3	0.398501	0.446447	0.663936	0.772497	0.373997	1.74944	1.46872	7	6	10.9995	0.104088	-1.83415	-0.247966	2.4454		0.326902	1.44971	1.06113	1.13189	2.1597	0.132727	-1.16067	-1.40154	3.48425
MED15	0.430264	0.446837	0.692926	2.89036	2.46009	1.60123	0.602293	3	5	2.34552		3.00503	3.00848	2.51567		2.1941	1.5772		4.66937		1.56464			2.43707
CSN5	0.35473	0.45148	0.659769	0.468826	0.114096	1.5395	1.39689	7	7	11.8884	-0.599614	0.633579	1.24417	1.86239	-2.19276	0.700738	-0.84983	-1.64576	-0.540221	2.41333	0.554433	2.57353	-0.0120209	-0.0615032
PHOS	0.271708	0.45267	0.671779	4.50517	4.23346	0.218346	1.297	2	5	4.4966		4.2787	3.10665	6.42293		3.52196	3.83707			4.65956	4.35078
ARPC5	0.262007	0.454847	0.658446	4.63211	4.3701	1.26253	0.853644	7	7	10.5376	3.56946	5.34809	4.34053	5.35851	3.06646	4.2496	4.65805	4.98899	5.74587	5.47147	5.72019	2.50502	3.29826	4.69494
HP1B3	0.435601	0.45885	0.65613	3.71729	3.28169	2.13414	1.32441	7	7	10.0245	4.80576	3.52578	2.03482	2.40966	5.00587	1.6175	3.57243	2.94762	4.54985	1.69533	5.16221	0.455422	6.62921	4.58138
WDR82	0.386031	0.464805	0.666798	1.90043	1.5144	1.18494	1.05295	3	5	3.90567		2.65908	-0.139912	2.08052		1.66735	1.30497		3.26132	1.09721		1.34277
CPT2	0.517955	0.465679	0.65209	0.0451147	-0.47284	2.02192	1.80706	7	5	9.36174		0.241842	-3.15693	-0.997951		-0.215479	1.76431	0.0682948	-1.97646	-2.11944	2.86189	1.91753	-1.66328	1.22727
LRRC1	0.353643	0.465744	0.658251	0.993098	0.639455	1.06989	1.24221	6	4	5.84344			-1.13841	1.02816		1.75384	0.914235	0.911334	3.10067	0.139923	0.833391		0.422216	0.551049
PCY1A	0.308437	0.467344	0.652773	1.12257	0.814135	0.991817	1.16538	6	5	7.96469		-0.77912	0.411022	2.42489		0.830054	1.18383	0.792171		0.493772	0.0705404	0.651951	2.30915	2.41784
DHB11	0.438114	0.468051	0.651355	3.11589	2.67778	2.23306	1.0708	7	7	8.62073	2.11382	3.64693	2.65541	0.642989	3.31904	2.65416	3.71208	-1.28157	2.42279	3.75756	5.74476	2.72166	3.92983	4.51618
CROCC	0.19731	0.468119	0.67626	5.29219	5.09488	0.680739	0.263763	3	3	2.58728	5.12213			4.81854	5.34395						4.82869		4.97414	6.07374
DIAP1	0.275809	0.470955	0.651271	1.79757	1.52176	0.501239	1.46614	7	7	7.38366	0.775494	3.15657	2.5977	3.13793	-0.668355	1.08605	0.566917	1.43839	1.13781	2.10748	1.34469	2.3613	1.82711	2.3662
AT11B	0.594648	0.472845	0.672607	2.83325	2.2386	2.01836	0.819072	3	3	2.64134			3.08679			1.45214	2.17687			5.09035	1.20183			2.20755
LIMS1	0.365825	0.47476	0.644468	2.25934	1.89352	1.37744	1.39378	6	7	10.7362	3.52916	3.63575	0.36421	2.42757	2.04397	0.414704	0.839255		0.460325	2.81624	3.59421	0.564762	3.01693	3.10359
PLD3	0.368956	0.484054	0.642608	3.5922	3.22324	1.42693	1.10285	5	7	7.26042	1.77904	4.77799	4.43046	2.60656	2.30641	3.11527	3.54696	5.42071	4.34992	3.84611	1.91791	2.42634
ANXA6	0.0854173	0.48455	0.637551	7.43615	7.35074	0.273685	0.377655	7	7	10.9397	7.05096	7.44969	7.81797	7.53404	6.71247	7.64378	7.24624	7.28653	7.44471	7.47752	7.39094	6.96412	7.81561	7.67364
THUM1	0.399433	0.485461	0.660198	4.9046	4.50517	1.64023	0.114853	4	3	3.03916				4.44904		4.42917	4.63729			3.4297	4.45358	4.48234	7.25279
SNX9	0.211154	0.486462	0.637745	3.27643	3.06527	0.700121	0.795375	5	7	9.43106	1.53705	2.87552	3.16829	4.22273	3.25884	3.22573	3.16876		2.89835	2.44557	3.79353		4.17944	3.06524
HYAL2	0.206114	0.489601	0.642398	1.61902	1.4129	0.47382	0.715514	3	5	5.79384		0.394578	1.04589	1.78715		1.58309	2.25381			1.30967	2.1645		1.38288
NDUC2	0.37011	0.490617	0.635469	7.15338	6.78327	0.838042	1.65968	4	7	8.97515	7.97279	6.48777	7.1248	3.22416	8.07594	7.15955	7.43789			7.63552	7.41243		5.90737	7.6582
PBDC1	0.582101	0.495401	0.651001	1.01523	0.43313	0.48357	2.28272	3	4	3.35175			-0.139628	2.70823		1.66514	-2.50123	1.23853			0.460362	1.3468
GAPD1	0.472646	0.496437	0.653616	1.06338	0.590735	0.0534098	1.90316	3	4	3.0063		-0.659825		1.76176		-1.36043	2.62144	1.00538				1.07423		1.11053
PCAT2	0.373059	0.496614	0.628614	4.44094	4.06788	1.50237	1.30116	7	7	11.7602	4.35342	3.7918	4.3221	1.32264	4.77654	4.55087	5.35782	1.26565	4.4798	5.24175	6.0021	4.77532	4.36806	4.95392
CO5A2	0.829965	0.496876	0.649164	2.85151	2.02155	3.22148	1.17027	4	7	3.45968	3.26058	0.94299	3.69544	1.57532	0.772557	1.2635	2.64045	7.16638			-0.447624		3.09049	1.59681
MIC27	0.974375	0.499372	0.657124	2.74298	1.7686	3.1693	1.65958	3	6	2.5667	1.57994		0.461813	-0.640633	3.19207	2.26127	3.75714		0.842764	6.40165	0.984513
ARHGF	0.147415	0.504865	0.674779	2.5111	2.36369	0.35857	0.204796	2	2	1.58967				2.5085		2.21887			2.76465		2.25755
CHM4B	0.448327	0.505757	0.629135	3.23429	2.78596	0.785378	1.99363	5	6	6.74338	6.64755	1.11605	3.08765	2.03117		1.92564	1.90769	2.67136			3.14978	2.79772	4.60246	2.95012
UCHL5	0.9747	0.509532	0.696431	3.8706	2.8959	2.66943	0.76048	2	6	1.05468	2.99269	3.98562	3.11008	1.95928	3.24006	2.08768			1.98303	5.75817
LTOR3	0.174127	0.511361	0.629613	5.93447	5.76035	0.158468	0.821089	7	6	5.31985	4.23593	5.52615	6.08318	5.98092		6.59268	6.14322	5.9502	6.07357	5.99626	5.59989	5.99747	5.89185	6.03208
NOS3	0.49244	0.513761	0.621854	3.66718	3.17474	2.37145	0.898467	7	7	7.68772	1.70612	2.86556	3.72228	3.85631	2.35293	4.1857	3.53429	-1.12889	5.24533	2.38024	5.75622	4.03732	4.69721	4.68285
CBX1	0.425667	0.514714	0.62215	6.14817	5.72251	0.468081	2.06791	3	7	7.21118	8.46337	5.1107	3.0159	6.19155	8.16294	5.437	3.67609		6.18859		5.6612			6.59474
RS5	0.327731	0.5159	0.616514	5.05512	4.72739	1.3877	0.948251	7	7	10.6002	3.5718	4.64396	3.50569	5.36495	4.56579	5.43877	6.00078	4.31689	6.50773	4.98257	3.96824	2.94581	6.35648	6.30812
RRAGC	0.930102	0.519685	0.683335	3.6702	2.7401	2.42161	1.04129	2	4	1.19006			3.61972	3.65534		1.96653	1.7188				1.95786			5.38254
URP2	0.400218	0.519799	0.613845	1.44955	1.04933	1.67825	1.15465	7	7	10.6405	-0.183985	1.39112	1.9916	2.28346	1.36246	-0.884477	1.38512	3.0345	-0.596385	3.86864	-0.0228078	1.2141	2.34778	0.301007
ITPR2	0.354513	0.522023	0.613894	3.03301	2.6785	1.36107	1.03301	6	7	9.27258	2.802	2.34363	3.34137	0.953657	2.12061	2.93353	4.25471		3.01099	3.00701	5.13787	0.875245	3.37495	2.79202
NUMA1	0.424193	0.522912	0.617328	2.91976	2.49556	2.06705	0.577714	7	7	6.93167	2.12741	1.925	1.75784	2.51603	3.27906	2.89776	2.96584	-1.13333	2.15182	3.52169	5.19429	2.5605	3.68419	4.45912
DBLOH	0.346416	0.527713	0.611861	4.13064	3.78423	1.59896	0.67807	7	7	8.09041	3.26393	4.34314	2.86303	4.79547	3.78338	3.33549	4.10515	4.79916	5.17728	1.91436	5.61516	3.61949	5.67065	2.1184
SDF2L	0.240364	0.528315	0.62059	2.78689	2.54653	0.610284	0.761511	3	7	4.84114	2.58746	2.81224	2.29478	4.03097	1.75864	2.5151	1.82652		2.79186		2.17414		3.39468
EPIPL	0.548261	0.532362	0.617155	4.07209	3.52383	2.15293	0.633078	5	3	5.02716				3.92655		2.79412	3.85082	7.87021	2.7845		3.06409		2.92586	3.71579
DC1I2	0.343034	0.533448	0.605826	2.77505	2.43202	0.812519	1.45753	6	7	9.6217	1.45031	3.4044	2.57549	5.14759	0.782065	1.83637	1.82791	1.87037	4.06426	2.87437	2.12287		2.4285	3.28996
SHPS1	0.30734	0.534802	0.618792	2.19461	1.88727	0.760842	0.741076	3	4	4.38027	2.99687		1.55745	1.5395		1.45526				2.82629	1.34998	2.40757
B2MG	0.293803	0.53853	0.605349	6.39872	6.10492	1.34709	0.518478	7	7	7.73948	6.37167	5.08803	6.14753	6.78433	6.2856	6.02646	6.03084	7.70057	8.28169	6.13978	4.68618	6.43138	4.80866	6.74282
FLNB	0.109441	0.541059	0.598873	7.49267	7.38323	0.332546	0.419296	7	7	11.4083	7.22739	7.60895	7.5315	7.83358	6.52536	7.45613	7.49968	7.05483	8.08793	7.26824	7.66218	7.30607	7.5314	7.53802
MICU2	0.448875	0.541249	0.617623	2.97838	2.5295	0.675809	1.5446	5	4	3.92028			2.14415	0.504021		3.72486	3.74498		4.07608	2.48194	2.36579		2.99235	2.97571
AP180	0.89405	0.543669	0.602425	2.02227	1.12822	2.24422	2.91289	5	5	7.51144		4.12421	1.68259	1.48114		2.08469	-3.73152	1.42363	0.390352	5.94666	1.55563	0.795094
DLRB1	0.582384	0.544894	0.639724	4.30066	3.71827	1.24969	1.3444	2	5	2.03133		2.64099	4.66804	5.60048		2.63492	3.04695		5.18432		3.417
NDUS4	0.264527	0.54763	0.594251	6.49987	6.23534	0.826312	0.974937	7	7	11.686	6.5897	5.75101	6.56441	4.26409	6.37865	7.07871	7.0208	7.31621	7.13588	6.21936	6.87984	6.77663	6.31161	4.85953
TRUB2	0.65477	0.550888	0.67887	3.38361	2.72884	1.6776	0.105156	2	2	1.00786		2.65448	2.80319								2.19736		4.56985
PYGL	0.519848	0.55296	0.605361	2.73252	2.21268	1.25905	1.46031	3	6	4.73793	3.17288	4.13359	2.43271	2.22459		1.41657	-0.104287	3.52204		3.39498	1.28055
C1QBP	0.378488	0.554347	0.590053	5.6609	5.28241	1.1209	1.41659	7	7	11.3974	4.21928	4.59753	4.87321	5.79538	3.36754	6.99118	7.13279	3.98086	6.36044	5.38637	6.92408	4.3709	6.11476	6.4889
KCRU	1.14466	0.557882	0.64183	5.42924	4.28458	2.4518	1.55192	2	2	1.69047			3.18721	5.38195				7.16292		3.69556
TASOR	0.25658	0.561983	0.598831	0.743955	0.487375	0.245512	0.944223	2	5	4.90583		-0.59971	0.608526	-0.333082		1.60535	1.15579				0.917558			0.570352
GBB1	0.204168	0.562483	0.58442	6.96463	6.76046	0.620459	0.733004	7	7	11.6813	5.73849	6.58294	7.0458	7.45089	5.8311	7.51193	7.16208	7.27228	7.75335	7.69523	6.10905	6.61364	6.57805	6.73081
RUVB1	0.248554	0.563339	0.583734	5.3331	5.08455	0.772698	0.875008	7	7	11.8191	3.72447	5.13467	5.45564	6.48552	4.31508	5.20847	5.26798	5.1776	6.74538	5.78547	5.31346	5.12743	4.26298	4.91939
FHL2	0.331833	0.564593	0.589028	5.7442	5.41237	1.28861	0.693396	6	7	7.4095	6.47398	5.80118	4.78647	5.61525	5.7883	4.55629	4.86512		7.93487	5.40622	5.54129	5.80426	5.85955	3.91904
VIME	0.128438	0.56542	0.583013	8.94787	8.81943	0.360439	0.480915	7	7	11.1239	8.56783	8.8796	8.47105	9.18284	8.03977	9.33225	9.26267	8.26384	9.40512	9.03651	9.13805	8.87905	8.79252	9.11997
FRYL	0.596482	0.565847	0.624349	1.8059	1.20941	1.78656	0.486232	3	5	2.17957		1.06866	1.79087	0.477417		1.42411	1.28601		1.87672		-0.0150221			3.55599
RPN2	0.338073	0.566459	0.582729	7.00618	6.66811	0.90502	1.29394	7	7	10.7368	4.99851	6.04294	7.46645	7.11529	5.08355	7.82569	8.14431	7.44295	6.42079	6.98617	7.92865	5.26274	7.51383	7.48812
DHX36	0.697813	0.571327	0.653034	3.09596	2.39815	1.62962	0.80983	2	4	1.25582			3.01338	3.01336		2.2591	1.30675		4.24828		1.94364
NOC3L	0.548423	0.571397	0.651491	2.21432	1.6659	1.27395	0.811402	2	6	1.28403	3.18644	1.34251	1.52133	1.88141		0.987884	1.07583			3.11514	1.3135
THIM	0.381677	0.583935	0.571804	2.35431	1.97263	1.44856	0.944613	7	7	10.3214	1.59955	1.7008	0.944979	1.82339	1.21609	2.97362	3.54997	3.45823	2.05656	0.441372	3.71308	0.330818	3.47825	3.00183
CHM2A	0.670052	0.586347	0.585034	3.48353	2.81348	1.0136	1.96309	3	4	4.63361	5.57305		2.86207	1.42805			1.39075				3.31249		4.57177	2.56634
SEM4C	0.6737	0.58767	0.599006	3.77894	3.10524	1.03528	1.52805	2	3	2.92701	4.31137		3.61747				1.38689				3.04689			4.511
PSA	0.605708	0.588229	0.57122	4.00856	3.40285	2.11916	1.47746	6	7	8.76622	1.73426	4.42719	5.08549	5.14304	3.07094	2.5675	1.79152	4.34247	4.41102	7.17336	3.72202	3.86705		0.535428
MCCB	0.440629	0.588551	0.569733	2.11925	1.67863	1.47143	1.18218	6	7	9.61147	0.418933	1.07439	1.2254	0.937631	1.44199	3.63832	3.01372	0.952627	4.26583	0.83092	3.64374	1.76954	1.25288
ENPP4	0.217254	0.590154	0.579308	2.25509	2.03783	0.76152	0.312553	5	5	5.31045		1.60295	2.22101	1.88633		2.06078	2.41809		1.694	2.90103	3.22232		1.50702	1.95106
RB3GP	0.469301	0.590438	0.58614	1.08842	0.61912	1.12623	1.11972	3	6	4.06799		-0.772374	0.860515	2.26634	0.897771	-0.537664	1.00013		0.572489	0.312576	2.38019
ANXA5	0.13264	0.590566	0.566126	7.63022	7.49758	0.456873	0.379968	7	7	11.6142	7.37569	7.34374	7.66098	7.97497	6.78431	7.71498	7.62839	7.84231	7.88619	7.27037	7.67634	6.82506	7.6816	8.22968
MCU	0.508519	0.590851	0.566743	4.14729	3.63877	1.51494	1.58352	6	7	10.8329	2.55991	2.30191	3.04872	2.49865	3.36347	5.30313	6.39562	2.85218	2.89836	2.68944	6.19907		5.09555	5.14915
NDUA4	0.586119	0.591543	0.569209	6.41435	5.82823	0.982003	2.27698	4	7	8.69847	7.82999	3.76745	3.27038	3.18024	7.433	7.54444	7.77216			6.85138	7.38428	6.33195		5.0898
ECHA	0.172136	0.593968	0.5638	7.07361	6.90147	0.500574	0.58081	7	7	11.7442	6.35316	6.90187	7.27766	7.21938	5.86171	7.33275	7.36377	7.36622	7.66776	6.9612	7.4635	6.14666	7.03491	6.87501
GIMA4	0.705748	0.597582	0.647704	2.01483	1.30908	1.6204	0.640029	2	5	1.12761		1.06581	1.09047	0.479627		1.88471	2.02479						3.16063	0.869033
ERD21	0.541363	0.59842	0.584569	2.51408	1.97271	0.505826	1.71244	3	4	3.66423			-0.0115531	1.11677		3.17607	3.60958				3.0265		2.01512	2.50061
LMA2L	0.630964	0.600752	0.58998	3.34661	2.71565	1.63004	1.14219	3	6	3.0295	1.00599		4.2639	1.94277	2.63258	3.02281	3.42583				4.90721		1.65503	3.47759
DSG3	0.0798168	0.601819	0.573539	7.92438	7.84456	0.000691592	0.324864	2	6	5.00014	8.07737	7.23842	7.89047		8.16529	7.82465	7.87117	7.92389		7.92487
SRGN	1.07448	0.605478	0.634873	5.87429	4.79981	2.36128	1.59047	2	7	1.27249	6.76269	4.16087	5.53679	5.26561	6.21614	3.2621	2.39446			7.54396			4.20461
SUN2	0.522935	0.607273	0.556776	4.60251	4.07957	1.90711	1.24644	7	7	10.335	3.3215	3.45064	5.24239	2.21551	3.65731	5.02267	5.64701	1.8333	3.85517	5.49595	6.46449	2.43579	5.64848	6.48438
PLRKT	0.511899	0.617911	0.555456	6.20754	5.69564	0.637997	2.08069	6	7	7.28332	7.19687	6.43108	6.95625	6.74568	7.1729	2.40122	2.96548	6.4308	6.37169		4.91095	6.50412	6.48494	6.54274
ASH2L	0.456111	0.623813	0.554283	1.87614	1.42003	1.67171	0.586653	6	5	6.41197		1.09964	0.553137	1.65767		1.9818	1.8079		4.97852	0.425025	2.40772	1.56336	0.702746	1.17946
CADH5	0.577081	0.624815	0.548369	3.40627	2.82919	2.20805	1.04681	7	7	8.56742	3.52462	1.9729	3.27782	1.89907	1.38266	3.96706	3.78021	-1.43506	4.42466	4.06493	4.87997	3.87105	3.24317	4.79519
SPRE	0.459665	0.624988	0.603896	2.24365	1.78398	0.896651	0.745485	2	4	1.74136			2.74169	1.97313		1.0423	1.3788		1.60962		2.87767
K2C4	0.947647	0.626659	0.636798	6.79625	5.8486	2.09486	0.745364	2	6	1.08579	7.27049	5.65779		5.89495	5.55272	5.08556	5.63013	8.27754		5.31496
THOC1	0.0847127	0.629151	0.583219	5.46438	5.37967	0.220451	0.0621287	3	2	2.43579						5.4236	5.33574	5.25301		5.69291		5.44723
PGM1	0.987676	0.634582	0.5508	4.03872	3.05104	2.60839	2.24736	4	7	5.58269	3.20469	6.0668	2.80568	3.3523	5.23397	1.25382	-0.559943	2.45531		7.37264	1.54224	4.7847
SPHM	0.515842	0.636111	0.540365	2.3763	1.86045	1.34931	1.43331	5	7	9.10371	1.86175	1.08349	0.825882	2.63591	0.114277	1.99898	4.5029		3.76831	1.57685	3.74382	0.71998		2.07253
SMRC2	0.504979	0.63682	0.538276	2.16291	1.65793	1.76819	1.1292	7	7	10.1961	0.632883	2.18257	2.57028	2.82859	-0.34633	1.77973	1.95779	0.952329	4.04517	4.00776	2.64951	-0.526608	0.817039	3.19517
SAHH2	0.509456	0.64004	0.60131	2.61978	2.11032	0.996375	0.907283	2	6	1.60465	2.56906	0.639783	1.64704	3.31429		2.39075	2.10103			3.32432	1.91524
FA26E	0.466549	0.644504	0.537929	1.95809	1.49154	0.796049	1.54391	5	6	7.7173	2.98839	-0.264426		-0.446917	1.58651	1.98732	3.09834		2.6681	1.18393	2.95511		1.52429	1.45899
ERMP1	0.79947	0.646522	0.536711	1.10175	0.302276	2.67499	1.53478	6	7	7.7083	1.87459	-1.25554	-0.360116	-1.45932	2.32442	-0.378219	1.37011	3.88317	-1.84535		4.25542	-1.60142	-0.0562912	1.97495
GCP60	0.566271	0.646958	0.53097	0.982597	0.416326	1.75421	1.39967	7	6	10.9644	0.822965	-1.1259		2.84585	-0.73507	0.425854	0.264264	-0.622366	3.66523	1.79837	1.80158	-1.51781	1.61157	0.141605
MBD3	0.350081	0.647297	0.544719	3.61078	3.26069	0.898599	0.602104	4	4	5.24189	4.15605			2.98762		3.04375	2.85536		3.26455		2.49828		4.31776	4.36251
DEOC	0.111335	0.647912	0.566124	3.95784	3.84651	0.164327	0.219269	2	3	2.8061		3.96526	3.98079	3.59347									3.84164	4.07404
SGPL1	0.315175	0.648677	0.538814	1.16299	0.847816	0.552657	0.93538	5	5	6.48935		-0.140976	1.04596	-0.119362		1.69236	1.76109	1.1744		1.87286	1.45793		0.415798	0.893955
ATPB	0.198396	0.649562	0.537815	8.16908	7.97068	0.180887	0.787588	7	7	6.63124	7.00016	7.96735	8.33548	8.36648	6.7573	8.69311	8.67487	8.03166	8.4425	7.93417	8.34147	8.04282	8.18051	8.21041
CLIC6	0.566624	0.650723	0.534449	3.42537	2.85874	1.52464	1.21787	6	4	7.57943		4.55088	1.97611	2.94368		1.9643		3.65904	2.11866	5.69911	2.02637	4.68938	2.35965
JCAD	0.27415	0.651161	0.54198	0.181656	-0.092494	0.86999	0.35972	5	5	5.32885		-0.286713	-0.515541	-0.227094		0.27527	0.291609	-0.334649	-0.537928	1.51669	0.609543	-0.345373
CYTC	0.711622	0.653074	0.542555	2.98588	2.27426	1.20914	1.67332	3	4	4.99773				1.9686	4.685	1.59532	0.848109		2.08711		2.50996		4.36056
TBB4A	1.16785	0.657306	0.621013	5.32634	4.15849	2.44952	1.04719	2	7	1.10666	5.8879	3.33738	3.154	3.97654	4.06051	5.29316	3.39997			7.05842		3.59427
CO4A1	0.626823	0.65843	0.524044	3.46854	2.84171	1.97114	1.4517	7	6	10.8044	5.33079	1.83424	1.48858	1.80246		3.2768	3.31741	1.55465	5.26241	1.13308	3.89387	4.78042	5.92733	1.72798
CYFP1	0.539235	0.660434	0.523814	1.37913	0.839896	1.55823	1.35418	6	7	10.0568	0.568949	1.01582	0.0318911	2.51971	-1.61299	1.71355	1.64232		1.8514	1.04163	2.76276	-1.59191	2.16393	2.04697
IF4B	0.316178	0.661088	0.553729	1.0718	0.755618	0.106728	0.944554	2	4	3.14901				1.39378	0.390108	-0.405043	1.64363						0.996328	1.14726
TIE2	0.579861	0.665554	0.521354	3.18429	2.60443	1.09846	1.9763	6	7	9.6069	-0.0251425	3.49935	5.71776	3.02924	0.246035	2.6271	3.13665		3.8641	3.67711	4.80152	2.07419	2.53074	2.15805
ITCH	0.166098	0.669793	0.598834	1.86267	1.69657	0.324595	0.209942	2	5	1.35319		1.76016	1.99053	1.67903		1.64434	1.4088		2.09219		1.63315
LPCT4	0.599026	0.673015	0.520161	1.50266	0.903633	1.01091	1.87802	5	6	7.88925		-0.205565	3.37371	-1.35357	-0.416016	1.30047	2.72278	0.404553		1.80268	2.70712	2.09275		0.506191
LC7L3	0.476829	0.675674	0.545089	2.35542	1.87859	1.07974	0.810217	3	6	3.18372	2.11703	0.79633		2.53714	2.53975	2.37212	0.909192				1.10902		2.95192	3.00532
ACTZ	0.535028	0.679973	0.515196	4.97486	4.43983	1.27074	1.39361	7	5	8.22736		3.14427	2.84704	6.10284		5.1881	4.9169	3.92085	4.87373	5.75768	5.51197	2.68449	5.75351	6.32176
NDUS3	0.534187	0.683109	0.508358	5.31474	4.78055	1.26056	1.64061	7	7	11.2534	3.03908	3.53711	5.18488	5.28918	2.92595	6.75109	6.73655	4.47228	7.1899	4.08676	5.82514	3.81026	6.44275	5.37605
ARPC3	0.396533	0.68336	0.508945	7.0736	6.67707	0.873303	1.26267	7	7	10.6713	4.95152	7.17503	7.45629	7.69343	4.74069	7.44664	7.27587	7.0563	7.82204	7.41643	7.51744	6.89052	7.5845	5.22795
SYTC	0.407669	0.684818	0.522765	1.77742	1.36975	0.496934	1.27135	2	7	5.20412	0.14137	1.22088	1.64196	3.57708	-0.36211	1.5772	1.79184			1.42603				2.1288
[truncated: 2,347 more rows]
