# Supplementary material for: Transcriptional drifts associated with environmental changes in endothelial cells
Source: eLife. 2023 Mar 27;12:e81370. doi: 10.7554/eLife.81370 (PMC10168696; doi:10.7554/eLife.81370)
Supplement: Supplementary file 3. [file elife-81370-supp3.xlsx]

## Sheet: CvE
	statistic.t	parameter.df	p.value	conf.int1	conf.int2	estimate.mean.of.x	estimate.mean.of.y	modules.all	modules.CEL	modules.flow
ELN	19.2063	12.1943	1.74444e-10	8.61625	10.8169	10.7146	0.99801	brown	blue	greenyellow
COL23A1	11.512	7.68247	4.07295e-06	5.54494	8.34803	5.34984	-1.59665	yellow	blue	white
PPP1R12B	35.4202	11.9552	1.78169e-13	3.77508	4.27017	5.31624	1.29362	brown	blue	green
CXCL2	20.7643	10.8685	4.29752e-10	5.35535	6.62739	6.53112	0.539752	purple	blue	plum
TPX2	-21.6815	11.631	9.11249e-11	-5.51937	-4.50813	0.426424	5.44018	blue	turquoise	brown
SORBS1	18.6213	8.14707	5.75756e-08	4.91591	6.30057	5.2903	-0.317939	brown	blue	blue
ACTA2	25.2602	13.7003	6.90989e-13	7.06785	8.38239	6.98965	-0.735464	brown	blue	pink
TGFB3	26.742	9.78999	1.76472e-10	3.92423	4.63987	3.77232	-0.509731	brown	blue	turquoise
DUSP1	16.7883	13.967	1.17831e-10	3.97379	5.13814	8.53174	3.97578	brown	blue	green
PTGIS	14.2051	9.55328	9.66152e-08	6.01073	8.26407	7.7334	0.595994	brown	blue	skyblue
ZFP36	20.7954	13.22	1.73852e-11	6.63078	8.16531	8.07694	0.678892	brown	blue	steelblue
BHLHE40	16.4615	12.8735	5.01466e-10	4.48767	5.84507	7.60939	2.44302	brown	blue	blue
KLF4	13.2413	9.22579	2.59928e-07	6.01237	8.47887	6.81688	-0.428734	yellow	blue	greenyellow
HMGA1	-17.5063	13.8175	7.96217e-11	-5.07683	-3.9674	2.82911	7.35122	turquoise	turquoise	brown
CSRNP1	17.6821	8.54944	4.9661e-08	3.53119	4.57689	6.48493	2.43089	brown	blue	steelblue
ITPR1	27.4588	13.9245	1.58771e-13	3.1682	3.70536	5.31589	1.8791	brown	blue	green
FBLN2	17.1414	11.5613	1.40918e-09	7.04134	9.10195	7.92002	-0.151624	yellow	blue	greenyellow
COL1A2	15.4482	13.4772	5.8595e-10	6.78533	8.98248	8.78534	0.901439	brown	blue	skyblue3
FOS	26.886	13.9938	1.9059e-13	9.25963	10.8651	9.14534	-0.91703	brown	blue	red
JUNB	32.5436	13.6228	2.59061e-14	5.82653	6.651	8.01425	1.77548	brown	blue	midnightblue
SYNPO2	26.3983	9.41589	3.78392e-10	8.83559	10.4797	6.12986	-3.52779	brown	blue	green
SOCS3	28.5619	12.5537	8.44233e-13	5.2925	6.16204	8.87401	3.14674	brown	blue	magenta
ARID5A	21.4978	7.96785	2.43014e-08	3.07199	3.81081	5.26062	1.81923	brown	blue	green
VEPH1	-23.764	9.20222	1.41989e-09	-6.25091	-5.16759	-1.30026	4.40899	turquoise	turquoise	royalblue
CEBPD	16.2651	8.47726	1.0937e-07	4.274	5.67015	5.14839	0.17631	yellow	blue	green
MMP28	19.6124	10.0089	2.56636e-09	5.43257	6.82497	5.55254	-0.576233	brown	blue	blue
TSPAN6	4.47779	7.68619	0.00227793	0.652053	2.05733	3.98882	2.63413	greenyellow	magenta	turquoise
DPM1	-3.05217	11.8132	0.0102085	-1.07855	-0.179153	1.64379	2.27264	cyan	yellow	purple
SCYL3	2.18396	8.20422	0.059661	-0.016205	0.647666	0.715051	0.39932	magenta	grey	green
C1orf112	-8.00327	12.3019	3.18979e-06	-2.54813	-1.45994	-0.614377	1.38966	blue	turquoise	brown
FGR	9.16893	10.829	1.9615e-06	5.65304	9.2334	2.72547	-4.71776	brown	blue	pink
CFH	7.302	10.3796	2.11886e-05	2.02172	3.78478	6.88833	3.98508	brown	blue	sienna3
FUCA2	-7.00204	10.1648	3.40859e-05	-1.35975	-0.704365	2.36782	3.39988	cyan	yellow	brown
GCLC	1.77808	8.61277	0.11061	-0.135296	1.09818	2.22109	1.73965	greenyellow	orange	greenyellow
NFYA	-2.0118	13.9425	0.0639795	-0.749235	0.0241152	2.22593	2.58849	pink	turquoise	red
STPG1	4.49146	13.1555	0.000589475	0.450765	1.28434	1.1909	0.323352	tan	blue	greenyellow
NIPAL3	9.87155	13.2989	1.7177e-07	1.55348	2.42138	3.78396	1.79653	yellow	blue	green
LAS1L	-5.01996	11.1279	0.000376548	-1.09027	-0.426275	2.31358	3.07185	green	turquoise	brown
ENPP4	4.36082	13.6499	0.000690546	0.829369	2.44241	3.25596	1.62007	greenyellow	magenta	yellow
SEMA3F	4.70928	13.4915	0.000369848	0.548827	1.47284	5.85718	4.84635	yellow	blue	white
ANKIB1	0.111483	10.4424	0.913347	-0.15724	0.173904	3.29217	3.28383	black	yellow	red
CYP51A1	-2.14645	9.25886	0.0595502	-1.78293	0.0430036	-1.33887	-0.468906	blue	turquoise	plum
KRIT1	1.72525	13.9542	0.10655	-0.0845795	0.779103	2.67407	2.32681	darkgreen	pink	black
RAD52	0.971686	9.42922	0.355472	-0.27289	0.688875	1.16394	0.955947	grey	purple	green
BAD	-1.36906	13.9256	0.192658	-0.750745	0.165915	1.59484	1.88725	black	turquoise	tan
LAP3	2.71023	12.689	0.0181649	0.110831	0.992545	4.27721	3.72552	yellow	blue	blue
CD99	1.44091	13.7813	0.171944	-0.142814	0.724878	5.46589	5.17486	salmon	brown	blue
MAD1L1	-2.27235	12.4969	0.0414466	-1.04143	-0.024176	2.18736	2.72016	green	turquoise	blue
LASP1	-2.4541	8.32597	0.038558	-0.758901	-0.0261865	5.41269	5.80523	blue	turquoise	mediumpurple2
SNX11	-2.92084	13.9303	0.0112202	-0.576644	-0.0882098	1.38609	1.71852	turquoise	turquoise	lightpink4
M6PR	-4.19091	10.2164	0.00177065	-0.877533	-0.269466	3.09634	3.66984	turquoise	turquoise	grey60
KLHL13	7.94022	9.96659	1.28302e-05	1.58563	2.82344	4.28194	2.07741	yellow	blue	floralwhite
CYP26B1	-1.79046	13.9733	0.0950618	-3.11566	0.280805	-1.61264	-0.195214	black	turquoise	darkseagreen4
ICA1	7.69173	9.86054	1.79885e-05	0.787168	1.43095	2.8257	1.71664	yellow	grey60	tan
DBNDD1	-6.04914	10.897	8.65389e-05	-3.29126	-1.53367	-0.382017	2.03045	black	turquoise	saddlebrown
ALS2	-4.69988	13.6822	0.0003626	-0.7071	-0.263295	2.95735	3.44255	blue	turquoise	turquoise
CASP10	7.51734	13.9994	2.80486e-06	0.845357	1.52031	4.22234	3.03951	brown	blue	blue
CFLAR	9.7038	13.8362	1.49847e-07	0.810796	1.27156	5.99231	4.95114	brown	blue	green
TFPI	3.98723	8.01048	0.00401022	0.491577	1.83937	7.22244	6.05697	darkgreen	magenta	tan
NDUFAF7	-1.63675	11.2841	0.129244	-0.548246	0.0797817	1.17003	1.40426	green	yellow	skyblue2
RBM5	3.5963	11.9653	0.00368698	0.143612	0.585462	4.25804	3.89351	red	purple	tan
SLC7A2	-4.56397	9.74076	0.00110818	-4.59812	-1.57398	0.989304	4.07535	blue	turquoise	floralwhite
ARF5	-0.0398557	13.0736	0.96881	-0.44808	0.431838	3.14216	3.15028	black	green	midnightblue
SARM1	9.49345	11.5747	8.33406e-07	1.30709	2.08992	1.33798	-0.36053	yellow	blue	blue
POLDIP2	-17.4729	10.853	2.71805e-09	-1.19182	-0.924759	3.58609	4.64438	green	turquoise	purple
PLXND1	1.93256	12.0742	0.0770878	-0.0649499	1.09058	6.80231	6.28949	salmon	greenyellow	blue
AK2	-5.42572	8.4412	0.000521787	-1.08295	-0.441068	3.85671	4.61872	green	turquoise	magenta
FKBP4	-11.4701	8.47525	1.88002e-06	-1.61916	-1.08147	3.1371	4.48742	turquoise	turquoise	turquoise
KDM1A	-6.2587	13.599	2.39094e-05	-1.02242	-0.499449	4.35058	5.11151	green	green	darkgrey
RBM6	3.45895	8.65403	0.00761008	0.160167	0.776506	4.31343	3.84509	purple	purple	green
CAMKK1	9.61779	11.2215	9.3151e-07	1.8726	2.98054	2.63508	0.208508	brown	blue	black
RECQL	-3.71906	10.1891	0.00385591	-1.25848	-0.316973	2.80488	3.5926	cyan	yellow	turquoise
VPS50	0.929828	13.6029	0.368668	-0.160512	0.405012	2.0479	1.92565	grey60	pink	greenyellow
ARHGAP33	-0.982776	11.3941	0.346126	-0.871912	0.332053	-0.236612	0.0333182	green	salmon	brown
NDUFAB1	-10.199	9.06113	2.88231e-06	-1.52671	-0.972869	2.32427	3.57406	blue	turquoise	magenta
PDK4	6.9563	13.8247	7.16746e-06	1.76821	3.34733	2.20101	-0.356756	salmon	blue	tan
SLC25A13	-4.36439	11.0563	0.00111464	-0.894333	-0.294945	1.95034	2.54498	turquoise	yellow	cyan
ST7	-1.22354	10.3593	0.248227	-0.481947	0.139233	1.79042	1.96178	pink	yellow	magenta
CDC27	-2.41566	11.2132	0.0338806	-1.17163	-0.0558366	4.05824	4.67197	midnightblue	tan	brown
HCCS	-3.77467	10.26	0.00347285	-1.50938	-0.391284	0.834585	1.78492	pink	tan	turquoise
DVL2	-2.87136	8.91148	0.0186189	-0.624521	-0.0736462	2.41117	2.76025	lightcyan	turquoise	yellow
UPF1	-3.14514	8.05781	0.0135744	-0.767307	-0.118585	4.07841	4.52136	turquoise	red	turquoise
SKAP2	0.147278	8.87316	0.886204	-0.429645	0.489346	2.45433	2.42448	pink	lightcyan	black
SLC25A5	-9.81927	12.5671	2.96259e-07	-1.65383	-1.05562	3.6766	5.03132	turquoise	yellow	brown
MCUB	-4.3972	9.00364	0.0017257	-1.58565	-0.508416	1.41625	2.46329	turquoise	turquoise	cyan
HOXA11	0.215446	7.37883	0.835255	-0.534248	0.64259	1.14902	1.09485	magenta	midnightblue	darkseagreen4
POLR2J	-4.00148	9.20631	0.00296487	-1.39685	-0.390083	0.673975	1.56744	cyan	yellow	saddlebrown
DHX33	-3.5321	13.761	0.00339708	-1.20892	-0.29451	1.94152	2.69323	turquoise	turquoise	royalblue
THSD7A	0.891419	13.6477	0.388151	-0.537648	1.29925	2.68435	2.30354	lightyellow	black	paleturquoise
LIG3	0.358342	13.9659	0.725446	-0.192577	0.269813	3.02336	2.98474	red	grey	turquoise
RPAP3	-5.00487	12.8947	0.000246854	-1.28893	-0.511236	1.29674	2.19683	pink	yellow	turquoise
ACSM3	2.08299	9.61029	0.0649933	-0.0528705	1.45169	3.62661	2.9272	brown	blue	salmon
REXO5	3.59228	8.6298	0.00623117	0.20313	0.906473	0.891442	0.33664	purple	blue	salmon
CIAPIN1	-9.40566	9.5332	3.93966e-06	-1.4827	-0.911698	2.37669	3.57389	blue	turquoise	brown
SPPL2B	3.48397	11.2824	0.00492854	0.277071	1.21989	2.90218	2.1537	darkorange	purple	lightyellow
FAM214B	-1.35603	8.06253	0.211844	-0.900922	0.233142	3.02413	3.35802	blue	turquoise	brown
COPZ2	8.03065	13.3437	1.80451e-06	0.917614	1.5906	1.57423	0.320123	purple	blue	plum2
PRKAR2B	-5.58079	7.5279	0.000646477	-5.21616	-2.14216	-1.06116	2.618	turquoise	turquoise	darkorange2
MSL3	-3.8958	13.1513	0.00180324	-1.06795	-0.306601	2.48258	3.16986	turquoise	turquoise	salmon
CREBBP	5.07574	11.2487	0.000333326	0.55444	1.3994	4.56845	3.59153	tan	greenyellow	green
GCFC2	-1.64346	12.4491	0.125289	-0.821755	0.113486	1.46148	1.81561	green	tan	blue
WDR54	-3.78088	13.9886	0.00202858	-0.939142	-0.259267	1.57828	2.17749	green	turquoise	lightcyan
CROT	3.40836	11.3017	0.00562872	0.296232	1.36642	0.806821	-0.024507	magenta	brown	black
KMT2E	6.46131	13.7363	1.63673e-05	0.833715	1.66446	4.84822	3.59913	yellow	blue	black
RHBDD2	7.19276	13.0252	6.94597e-06	0.573368	1.06551	3.16198	2.34254	yellow	brown	lightcoral
SOX8	4.01084	12.4887	0.00159964	0.780617	2.61989	0.426983	-1.27327	yellow	blue	darkgrey
IBTK	-1.42728	9.43271	0.185753	-0.508949	0.113484	3.2214	3.41913	green	yellow	blue
ZNF195	-5.08	8.56099	0.000773701	-1.3405	-0.509981	1.10424	2.02948	turquoise	turquoise	darkolivegreen
MYCBP2	5.56964	12.0897	0.0001186	0.318457	0.72716	4.58923	4.06643	brown	brown	yellow
FBXL3	2.3885	9.49602	0.0392936	0.0350554	1.126	2.78103	2.2005	greenyellow	pink	skyblue
PDK2	6.43328	13.4973	1.86219e-05	1.01317	2.03193	1.90008	0.377529	salmon	brown	tan
ITGA3	5.6717	11.8797	0.0001077	0.545481	1.22725	5.05605	4.16968	yellow	brown	greenyellow
ZFX	1.00405	13.4342	0.333096	-0.22042	0.605567	3.21934	3.02677	grey	orange	darkslateblue
LAMP2	-0.517343	7.51023	0.619803	-0.738026	0.470067	4.28691	4.42089	grey60	lightcyan	ivory
GDE1	-1.14889	9.23608	0.279485	-0.78544	0.25498	3.04292	3.30815	pink	yellow	yellow
OSBPL7	-1.3495	8.97814	0.210219	-0.851987	0.215443	2.21586	2.53414	green	red	darkmagenta
TMEM98	2.55046	12.8539	0.0243438	0.0912801	1.11001	3.68744	3.0868	royalblue	brown	paleturquoise
MAP3K14	5.2001	12.0925	0.000216391	0.71127	1.73564	2.2287	1.00525	purple	blue	floralwhite
TMEM132A	-1.73874	11.9256	0.107803	-1.273	0.143434	3.08381	3.64859	black	green	paleturquoise
AP2B1	0.45373	13.0852	0.657457	-0.312222	0.478377	5.37044	5.28736	tan	salmon	blue
ZNF263	1.43107	13.1261	0.175787	-0.114106	0.56321	2.78898	2.56442	red	black	red
CX3CL1	8.84864	10.2369	4.09908e-06	3.44397	5.75244	1.45027	-3.14794	yellow	blue	plum2
SPATA20	2.54272	13.9869	0.0234593	0.069523	0.819383	3.67187	3.22741	red	black	honeydew1
TNFRSF12A	-4.81688	12.9332	0.00034139	-2.23292	-0.849659	2.35736	3.89865	green	turquoise	royalblue
RALA	-11.1876	12.4964	7.10977e-08	-3.11401	-2.10253	1.72945	4.33772	turquoise	turquoise	salmon
BAIAP2L1	-0.155644	12.4423	0.87881	-0.594016	0.514516	-0.554569	-0.514819	red	grey	pink
KDM7A	11.0152	8.8507	1.82658e-06	1.72291	2.61635	3.64262	1.47298	brown	blue	yellow
ETV1	-4.15168	8.40535	0.0028747	-4.1779	-1.21012	-1.92586	0.768148	turquoise	turquoise	lightcyan
AGK	-5.03696	8.28928	0.00090278	-0.773382	-0.289649	2.21428	2.74579	green	turquoise	brown
PHTF2	-2.00996	9.94732	0.0723301	-1.13641	0.0589108	1.64341	2.18216	midnightblue	tan	royalblue
FARP2	-3.76544	10.5065	0.00338359	-0.503976	-0.130798	2.96496	3.28235	green	turquoise	blue
GGCT	-4.00587	12.4903	0.00161396	-1.20256	-0.357639	0.54353	1.32363	turquoise	turquoise	brown
DBF4	-9.06493	12.8492	6.07403e-07	-4.3309	-2.66228	-1.41321	2.08338	midnightblue	yellow	magenta
IFRD1	-0.734651	11.5848	0.47716	-0.510748	0.253937	2.62565	2.75406	green	yellow	green
COX10	-2.82571	13.5313	0.0138505	-0.734393	-0.0994337	1.00059	1.41751	blue	turquoise	purple
GTF2IRD1	2.63802	10.662	0.023623	0.0863866	0.977293	1.61213	1.08029	magenta	purple	yellow
PAF1	-1.66753	9.72267	0.127242	-0.531741	0.077528	3.03757	3.26468	lightcyan	red	turquoise
VPS41	3.04798	12.926	0.00938936	0.113814	0.668952	3.78565	3.39427	salmon	cyan	lightyellow
ARHGAP44	8.65255	14	5.43411e-07	2.19611	3.64368	2.18617	-0.733725	brown	blue	ivory
ELAC2	-11.9725	9.40428	5.27815e-07	-1.39192	-0.951938	3.20302	4.37494	lightcyan	turquoise	darkolivegreen
ARSD	4.0862	12.1444	0.00147326	0.523117	1.71486	2.38593	1.26694	salmon	cyan	blue
PNPLA4	-0.332244	13.9981	0.744628	-0.705551	0.516282	0.138081	0.232716	black	yellow	honeydew1
ADIPOR2	-0.915019	13.8135	0.375879	-0.343613	0.138284	3.19603	3.29869	pink	salmon	turquoise
MARK4	2.60255	13.6464	0.0212173	0.0659321	0.692417	2.79053	2.41135	magenta	purple	darkorange
CCDC124	-7.24323	13.0913	6.26729e-06	-1.25297	-0.677571	1.56659	2.53185	pink	turquoise	purple
PAFAH1B1	1.45458	11.1906	0.173254	-0.0574694	0.282838	4.52218	4.4095	darkgreen	pink	blue
KIAA0100	-5.30165	10.0559	0.00034031	-0.807978	-0.330054	5.11463	5.68365	turquoise	turquoise	green
TRAPPC6A	4.55453	12.7873	0.000563424	0.788961	2.21739	0.36886	-1.13432	salmon	cyan	tan
CD79B	4.37789	13.5722	0.000677284	0.633962	1.85884	0.384326	-0.862075	brown	blue	pink
ST7L	1.34944	10.2372	0.206281	-0.0874299	0.358117	1.32236	1.18702	red	blue	green
RPUSD1	-9.8878	10.8199	9.45231e-07	-2.0499	-1.30221	1.62732	3.30338	turquoise	turquoise	turquoise
RHBDF1	-0.2092	9.93565	0.838519	-0.486316	0.402901	3.41471	3.45641	darkturquoise	red	magenta
LUC7L	1.92666	10.5109	0.0814739	-0.0446608	0.64452	3.32612	3.02619	purple	purple	turquoise
BAIAP3	-2.45134	8.96298	0.0367802	-2.85772	-0.113799	-3.35632	-1.87057	turquoise	turquoise	salmon
TSR3	-3.23429	12.7918	0.00664526	-1.18815	-0.23558	1.74449	2.45636	black	red	darkgrey
PIGQ	-0.925637	9.75941	0.376956	-0.578035	0.239529	2.40131	2.57056	turquoise	red	darkred
CRAMP1	1.71786	8.61575	0.121448	-0.115589	0.825049	1.59206	1.23733	magenta	purple	yellow
TEAD3	6.12794	10.4113	9.40138e-05	1.9617	4.18461	1.00723	-2.06592	yellow	blue	yellow
SELE	9.77317	13.7557	1.4452e-07	3.51885	5.50179	2.44483	-2.06549	brown	blue	red
DNAJC11	-6.43391	8.3057	0.00017142	-1.62703	-0.772487	2.02266	3.22242	turquoise	turquoise	turquoise
MYLIP	14.7775	8.79212	1.64506e-07	2.58102	3.51805	3.69939	0.649855	yellow	blue	midnightblue
E2F2	-1.66947	7.69247	0.135083	-4.41095	0.721242	-0.710567	1.13429	green	lightgreen	brown
PSMB1	-4.35212	11.2687	0.00108852	-1.3155	-0.433533	3.46978	4.34429	blue	turquoise	brown
JARID2	2.57216	13.1939	0.0229804	0.0994422	1.13319	2.18747	1.57115	salmon	brown	orange
CDKL5	8.77665	11.8706	1.55591e-06	1.27957	2.12603	2.09461	0.391807	yellow	grey60	yellow
NADK	3.8703	9.8786	0.00317917	0.173264	0.645299	4.03204	3.62275	yellow	brown	greenyellow
CYTH3	4.12373	13.2968	0.00114534	0.343813	1.09685	1.99366	1.27333	salmon	blue	skyblue
SYPL1	0.41424	13.2553	0.685324	-0.55052	0.812356	3.02836	2.89744	greenyellow	pink	pink
CYB561	0.898505	12.5687	0.385806	-0.203317	0.491134	3.58882	3.44491	red	grey	salmon
SPAG9	6.31727	9.15071	0.000128526	0.467279	0.986594	5.08281	4.35588	brown	blue	pink
AASS	4.17716	11.9389	0.00129691	0.571319	1.81863	3.29663	2.10166	purple	cyan	paleturquoise
SS18L2	-3.01712	8.28473	0.0159756	-1.39549	-0.190514	-0.234981	0.558022	cyan	yellow	thistle2
MPND	0.896169	13.1234	0.386307	-0.278745	0.674585	-0.450432	-0.648352	magenta	black	tan
MGST1	-6.94931	10.816	2.64587e-05	-5.30053	-2.74656	-1.61326	2.41029	turquoise	turquoise	brown
CRY1	1.38755	7.46005	0.205312	-0.211117	0.829228	2.70077	2.39171	greenyellow	grey	turquoise
NFIX	6.39558	13.9263	1.7086e-05	1.33711	2.68742	4.1826	2.17034	yellow	blue	skyblue1
ST3GAL1	8.58599	10.6692	4.08252e-06	0.529734	0.89681	5.07068	4.35741	brown	blue	bisque4
MMP25	5.87839	12.3773	6.61837e-05	2.79779	6.0756	0.543235	-3.89346	brown	brown	blue
IL32	-0.130124	12.2676	0.898578	-0.839631	0.744778	1.70754	1.75497	black	green	blue
PKD1	5.2305	7.81681	0.000853472	0.65116	1.6856	4.39624	3.22787	purple	brown	blue
MED24	-2.43013	10.7124	0.033947	-0.671357	-0.0321197	3.65052	4.00225	green	turquoise	brown
RHOBTB2	0.806081	12.8375	0.434875	-0.14764	0.323032	2.31198	2.22429	grey	greenyellow	yellow
HEATR5B	8.33143	10.8343	4.89733e-06	0.3607	0.62036	3.52669	3.03616	purple	brown	grey60
SEC62	3.51653	9.92311	0.00563639	0.321846	1.43824	4.26188	3.38184	greenyellow	magenta	turquoise
RPS20	0.498152	13.9392	0.626144	-0.391019	0.627481	5.40516	5.28693	red	lightyellow	blue
CSDE1	2.09323	9.40195	0.0645322	-0.0160333	0.451122	6.78644	6.5689	red	blue	lightgreen
UBE3C	-10.0191	13.799	1.03846e-07	-1.05142	-0.680224	4.12587	4.99169	lightcyan	turquoise	turquoise
REV3L	3.56071	13.0682	0.00345795	0.235515	0.961216	3.46658	2.86822	greenyellow	blue	yellow
FAM76A	0.986329	10.2397	0.346704	-0.283952	0.737595	0.761361	0.534539	grey	pink	greenyellow
POMT2	-4.60141	10.462	0.000869402	-1.14126	-0.399583	1.7265	2.49692	turquoise	red	turquoise
VTA1	-2.31587	10.8559	0.0411645	-1.22133	-0.0300761	2.22924	2.85494	cyan	yellow	plum1
BAZ1B	-8.16991	13.9086	1.12067e-06	-0.757757	-0.442475	4.23429	4.83441	blue	turquoise	darkturquoise
RANBP9	2.88593	10.5765	0.0153708	0.108129	0.817651	3.29757	2.83468	greenyellow	blue	yellow
SPRTN	-3.37675	8.30222	0.00917745	-1.02823	-0.196871	1.05208	1.66462	pink	yellow	purple
METTL13	-3.57048	8.72145	0.00633253	-1.07844	-0.239407	2.20277	2.8617	turquoise	turquoise	grey60
DYRK4	-1.44731	12.8914	0.171689	-0.786265	0.15573	1.50614	1.8214	blue	turquoise	cyan
ZNF207	-3.17949	8.72094	0.0116472	-0.756129	-0.12567	4.69106	5.13196	green	tan	blue
UQCRC1	-8.43232	13.016	1.24021e-06	-1.56019	-0.923857	3.39277	4.63479	blue	turquoise	purple
STARD3NL	-8.16484	8.01655	3.72467e-05	-1.6884	-0.944932	2.22345	3.54011	turquoise	yellow	royalblue
CD9	-2.14971	12.8642	0.0511963	-1.36312	0.00410149	5.58258	6.26209	midnightblue	yellow	darkolivegreen
NCAPD2	-26.6011	13.1073	8.57727e-13	-2.46499	-2.09496	2.65625	4.93623	blue	turquoise	brown
IFFO1	0.721655	10.9796	0.485591	-0.287525	0.567955	2.15949	2.01927	black	black	blue
PHF7	2.39696	12.6653	0.0327221	0.044237	0.874716	-0.47636	-0.935836	red	grey60	lightcyan
SEMA3G	-3.43577	11.0165	0.00555436	-6.4242	-1.40784	-4.43905	-0.523029	turquoise	green	blue
NISCH	1.9743	13.999	0.0684143	-0.0437342	1.05657	4.75009	4.24367	darkorange	black	blue
STAB1	1.80195	12.0429	0.0966221	-0.0961278	1.01748	7.14493	6.68426	red	black	blue
FUZ	2.36291	10.8414	0.0379306	0.0297797	0.860978	0.979494	0.534115	royalblue	purple	yellow
IDS	6.54612	12.2433	2.49224e-05	0.90341	1.80185	3.42162	2.06899	yellow	brown	lightcyan
PRSS3	-7.31658	13.9621	3.87179e-06	-5.31083	-2.90254	-4.91827	-0.811587	turquoise	green	pink
ZNF200	-3.58027	8.35847	0.00668614	-1.0224	-0.224953	0.37966	1.00333	turquoise	turquoise	blue
LRRC23	0.793701	8.90393	0.448004	-0.765047	1.58997	-1.13798	-1.55044	black	black	skyblue1
HFE	6.34477	13.6996	2.00621e-05	0.798097	1.61576	0.932166	-0.274762	brown	blue	cyan
SCMH1	3.03732	12.7475	0.00971621	0.0921388	0.549294	2.95823	2.63752	brown	blue	yellow
FYN	-2.08473	9.7076	0.0645186	-0.716805	0.0252985	3.48258	3.82833	black	green	salmon
HIVEP2	14.9839	13.8968	5.71265e-10	2.85295	3.8069	4.62972	1.29979	yellow	blue	yellow
ELOA	-8.21118	12.4483	2.25121e-06	-1.08146	-0.629314	3.09372	3.9491	turquoise	turquoise	red
LYPLA2	-7.51471	12.3834	5.88868e-06	-1.6442	-0.907027	2.6828	3.95841	lightcyan	green	steelblue
CLCN6	0.0692792	10.6459	0.946051	-0.383809	0.408652	1.93763	1.92521	black	midnightblue	orange
MRC2	3.26991	13.9881	0.00559237	0.442057	2.1278	4.29545	3.01052	salmon	cyan	tan
TSPAN9	11.3699	12.2046	7.45894e-08	1.72603	2.54248	5.37143	3.23717	yellow	blue	blue
BTBD7	6.07875	12.9216	4.01542e-05	0.550119	1.15731	4.09694	3.24323	tan	blue	green
APBA3	-0.295749	9.88249	0.773542	-0.493479	0.377992	1.57406	1.6318	black	red	yellow
MKS1	0.524046	11.7752	0.609969	-0.177667	0.289884	0.8332	0.777092	green	green	blue
ABHD5	-0.202768	10.2775	0.843274	-0.555215	0.46228	2.22722	2.27369	green	lightcyan	plum1
ANOS1	2.21404	8.22908	0.0568044	-0.0494273	2.75682	2.55746	1.20376	brown	blue	yellow4
AKAP8L	0.586921	13.0517	0.567271	-0.242193	0.422977	2.71533	2.62494	black	black	green
MBTD1	6.52704	9.31498	9.23596e-05	0.74186	1.52268	2.06486	0.932589	salmon	brown	tan
UTP18	-6.34473	13.8524	1.90571e-05	-1.38798	-0.686139	1.67435	2.71141	blue	turquoise	brown
RNF216	2.31037	10.9208	0.0414312	0.0118676	0.498554	3.89796	3.64275	red	purple	red
TTC19	6.5491	13.962	1.31026e-05	0.489004	0.96545	3.45263	2.72541	brown	blue	pink
PTBP1	-10.2937	12.6059	1.69335e-07	-1.41598	-0.923436	4.88152	6.05123	blue	turquoise	brown
DPF1	-2.18057	12.5733	0.0488586	-3.36666	-0.00985523	-3.79815	-2.1099	turquoise	turquoise	palevioletred3
LARS2	-9.63077	11.0985	1.00249e-06	-1.2295	-0.772469	1.8955	2.89649	blue	turquoise	brown
PIK3C2A	0.624395	13.842	0.542523	-0.355503	0.647058	5.12638	4.98061	purple	pink	greenyellow
PLAUR	-4.39618	8.46646	0.00200462	-2.64055	-0.834865	2.51498	4.25269	blue	turquoise	purple
ANLN	-14.2914	11.0626	1.77392e-08	-5.98637	-4.38951	0.165748	5.35369	blue	turquoise	brown
WIZ	-0.0942381	12.9065	0.926367	-0.329039	0.301552	3.31786	3.3316	magenta	midnightblue	yellow
RABGAP1	10.3902	13.9939	5.82574e-08	0.914848	1.39081	4.1348	2.98197	yellow	blue	yellow
DCN	8.71865	11.9193	1.61867e-06	4.67777	7.79779	7.69422	1.45644	brown	blue	blue
QPCTL	-5.16834	9.48391	0.000497845	-1.51472	-0.597399	0.590415	1.64648	turquoise	turquoise	turquoise
PPP5C	-8.92769	11.5585	1.58394e-06	-1.3182	-0.79924	3.12051	4.17923	blue	turquoise	white
CEP68	4.91706	12.3702	0.000325315	0.659189	1.702	3.66815	2.48756	yellow	brown	blue
MAP4K3	4.07054	8.89035	0.00286987	0.23598	0.828875	2.35801	1.82558	magenta	magenta	yellow
TMEM159	4.32513	13.1523	0.000802819	0.433399	1.29641	2.23088	1.36598	salmon	brown	darkred
BRCA1	-11.6894	12.7405	3.52343e-08	-3.24356	-2.22989	0.188806	2.92553	blue	turquoise	brown
ERCC1	-3.87752	13.7464	0.00172812	-0.582798	-0.167219	3.08712	3.46212	green	turquoise	salmon
MBTPS2	0.42646	12.7701	0.676874	-0.542145	0.808222	1.59511	1.46207	tan	darkred	brown
PRICKLE3	0.775223	13.4213	0.451651	-0.235586	0.500602	0.0813381	-0.0511696	magenta	salmon	lightcyan1
EXTL3	-1.86217	12.2387	0.0867541	-0.7951	0.0614493	3.80403	4.17086	turquoise	green	salmon
ELOVL5	-2.47945	13.9895	0.0265082	-0.672379	-0.0486378	4.02822	4.38873	cyan	yellow	brown
CALCOCO1	8.99439	9.97683	4.22946e-06	1.53317	2.54334	5.1058	3.06754	orange	brown	darkorange
UBR7	-3.1921	8.78708	0.0113082	-0.850889	-0.143546	2.34164	2.83886	blue	yellow	greenyellow
MAP4K5	-1.41274	9.26013	0.190449	-0.672206	0.154013	3.13467	3.39376	pink	yellow	turquoise
EHD3	4.24339	13.9764	0.000821512	0.472299	1.438	2.2324	1.27725	salmon	brown	midnightblue
PSMC4	-6.88866	9.1772	6.50633e-05	-1.59535	-0.808329	3.27484	4.47668	green	turquoise	magenta
MAN2B2	12.0309	12.1199	4.24017e-08	1.28909	1.85849	4.0222	2.44841	yellow	brown	mediumpurple3
CLDN11	-10.2846	10.9032	6.01291e-07	-6.41601	-4.15194	-0.260541	5.02343	blue	turquoise	skyblue3
SLC25A39	0.245166	7.16845	0.813199	-1.19929	1.47821	4.29904	4.15958	darkred	lightgreen	darkorange
MVP	-0.208883	13.9488	0.837559	-0.601928	0.495122	4.60927	4.66267	green	green	brown
NUB1	3.75582	7.97062	0.00561489	0.105917	0.443413	3.19728	2.92262	salmon	blue	darkorange
PGM3	-5.05233	10.1722	0.000472012	-1.2112	-0.47102	2.78286	3.62397	cyan	yellow	red
RWDD2A	1.56607	13.9396	0.139745	-0.113564	0.727275	0.24088	-0.0659755	lightyellow	black	red
CLK1	4.00123	11.4969	0.00190976	0.425414	1.45359	4.05279	3.11329	purple	brown	green
POLR3B	-4.33254	13.8853	0.000701518	-1.42049	-0.47929	1.26464	2.21454	blue	turquoise	darkolivegreen
ANGEL1	11.413	13.3126	2.98768e-08	1.04259	1.52802	3.19759	1.91229	yellow	brown	black
RNF14	-1.02751	7.65199	0.335563	-0.955855	0.36983	2.75044	3.04345	darkred	lightgreen	turquoise
DNASE1L1	3.87166	13.9997	0.00169375	0.286813	0.999265	3.82921	3.18617	tan	blue	greenyellow
DDX11	-4.32665	7.73984	0.00272701	-2.59902	-0.784875	0.0171444	1.70909	green	turquoise	lightsteelblue1
HEBP1	-0.470997	13.9839	0.644906	-0.903009	0.577847	0.961982	1.12456	tan	salmon	green
GPRC5A	-0.0594355	12.4328	0.95355	-1.24639	1.17995	3.16794	3.20116	red	grey	greenyellow
MAMLD1	4.8196	13.9928	0.000272746	1.08946	2.83678	1.71585	-0.247269	yellow	blue	lightgreen
TACC3	-7.92204	10.4591	9.77292e-06	-3.65262	-2.05641	1.13233	3.98685	blue	turquoise	brown
UFL1	2.09001	11.1878	0.0602228	-0.0178925	0.720329	2.6823	2.33108	brown	pink	blue
POLA2	-10.7255	12.4424	1.19709e-07	-2.45301	-1.62737	0.734135	2.77433	blue	turquoise	purple
ZC3H3	2.50541	13.6596	0.0255621	0.0555231	0.726863	1.82231	1.43111	tan	greenyellow	salmon
CAPN1	-10.615	13.8545	4.90671e-08	-1.58327	-1.05057	4.09093	5.40785	blue	turquoise	brown
MDH1	-8.23644	9.59312	1.18282e-05	-1.60116	-0.916217	2.5752	3.83389	blue	turquoise	darkolivegreen
SLC30A9	-0.181953	8.60001	0.859836	-0.407355	0.347101	3.19177	3.2219	darkgrey	lightcyan	lightcyan
MTMR11	8.08133	9.32887	1.64627e-05	1.40247	2.48478	2.18853	0.244908	brown	brown	pink
COX15	-3.32486	12.4197	0.00579888	-0.506946	-0.10647	2.65708	2.96379	green	turquoise	pink
CCDC88C	2.54679	13.6806	0.0235872	0.0775348	0.916499	3.48702	2.99001	salmon	purple	blue
YAF2	5.29179	13.9341	0.000115666	0.402998	0.952721	1.1562	0.478336	greenyellow	blue	green
ZMYND11	7.55418	8.82475	3.88572e-05	0.421369	0.783173	4.03811	3.43583	yellow	blue	black
BID	-6.08276	9.89288	0.000123796	-2.39094	-1.10755	1.1553	2.90454	turquoise	turquoise	magenta
MATR3	1.89829	13.9229	0.0785852	-0.0569639	0.930365	0.375226	-0.061474	red	midnightblue	turquoise
XYLT2	-2.17325	11.7973	0.0508734	-0.685247	0.00152918	2.63691	2.97877	green	red	midnightblue
NUDCD3	-1.1344	13.7267	0.276049	-0.394565	0.121907	4.13473	4.27106	red	red	blue
GLT8D1	1.17647	8.41092	0.27163	-0.109619	0.341968	3.06151	2.94534	grey60	lightcyan	bisque4
ATP2C1	-0.0390412	13.7828	0.969417	-0.25133	0.242357	3.76427	3.76876	pink	pink	turquoise
SLC38A5	-4.13778	10.7239	0.00174096	-6.3712	-1.93762	-3.30327	0.851141	turquoise	turquoise	orangered4
RALBP1	-0.64481	9.63026	0.534108	-0.40691	0.224992	3.69192	3.78288	black	green	grey
RUFY3	5.795	13.8772	4.80853e-05	0.513249	1.11719	2.73078	1.91556	orange	brown	skyblue2
CNTN1	3.95759	13.2846	0.00157386	1.52726	5.18146	1.33237	-2.02199	brown	blue	blue
WWTR1	7.90596	10.0151	1.294e-05	1.03519	1.84743	6.55891	5.1176	yellow	blue	darkseagreen4
AGPS	-6.92087	8.51071	9.06485e-05	-1.50558	-0.75888	2.74353	3.87576	cyan	yellow	yellowgreen
CXorf56	-1.6793	10.0676	0.123811	-0.536504	0.0751175	1.40573	1.63642	green	turquoise	orangered3
TTC27	-7.19657	10.6316	2.11686e-05	-0.886268	-0.469778	1.81467	2.49269	green	turquoise	brown
ZNF582	6.83143	13.3246	1.05868e-05	0.746798	1.43509	-0.189923	-1.28087	yellow	blue	skyblue
VSIG2	-1.00713	10.193	0.33718	-1.40205	0.527598	-0.862504	-0.425278	green	turquoise	yellowgreen
PHLDB1	-0.429655	9.15698	0.67738	-0.67973	0.462263	4.74879	4.85753	green	red	magenta
PRDM11	9.2235	11.9353	8.87679e-07	1.48474	2.40388	2.99805	1.05374	yellow	blue	green
CD74	11.1576	9.15035	1.24205e-06	5.18438	7.81295	5.25759	-1.24107	brown	blue	grey60
ZRANB1	4.44771	10.7323	0.00104307	0.393893	1.17032	2.41274	1.63064	magenta	brown	yellow
NCDN	-2.24434	10.2728	0.0479721	-0.725306	-0.00393007	2.09084	2.45546	turquoise	red	turquoise
ADGRA2	17.767	13.6779	7.67579e-11	3.0112	3.8401	6.87956	3.4539	yellow	blue	black
ZFP64	-4.67623	13.6508	0.000381246	-1.57584	-0.5832	0.81392	1.89344	turquoise	green	yellowgreen
MNAT1	-6.79084	9.70759	5.54278e-05	-1.02619	-0.517587	1.17936	1.95125	blue	turquoise	steelblue
SAMD4A	4.49315	8.78612	0.00159714	0.474712	1.44464	4.58009	3.62041	brown	blue	red
MRE11	0.720172	13.991	0.483278	-0.264519	0.531935	2.06198	1.92827	green	pink	cyan
SERPINB1	6.78748	8.39581	0.000111442	1.18045	2.38035	4.05036	2.26996	brown	blue	cyan
SPAST	1.22774	12.4214	0.242303	-0.1234	0.444754	2.57583	2.41515	magenta	lightcyan	black
NRXN3	0.615968	13.6863	0.548024	-0.940351	1.69581	-4.06703	-4.44476	black	green	skyblue3
OSBPL5	6.49543	13.9995	1.4127e-05	0.612442	1.21629	3.17336	2.25899	yellow	brown	black
AQR	-2.66961	13.694	0.0185923	-0.600099	-0.0647956	3.77339	4.10583	green	tan	brown
FHL1	8.69562	11.4491	2.21435e-06	1.26287	2.11337	4.85484	3.16672	brown	blue	salmon4
NLRP2	-1.63213	13.6171	0.125552	-3.29974	0.452161	-1.34649	0.0772972	turquoise	turquoise	plum
SLC45A4	3.72884	13.7894	0.00229988	0.725507	2.69681	0.697872	-1.01328	royalblue	brown	mediumpurple2
RNF10	0.434046	7.55581	0.676381	-0.666254	0.971339	5.13799	4.98545	darkred	lightgreen	purple
ZNF839	1.11151	12.5008	0.287271	-0.15412	0.478053	0.639814	0.477848	black	black	blue
ZDHHC6	-4.50094	10.4908	0.00101259	-0.72097	-0.245531	2.61281	3.09606	green	yellow	turquoise
GRAMD1B	12.6425	13.7956	5.66363e-09	2.58553	3.6438	3.76481	0.650147	yellow	blue	yellow
RNH1	-1.77304	10.5329	0.105095	-0.536075	0.0591634	4.65535	4.89381	green	turquoise	darkgreen
NDUFS1	-5.08561	12.5564	0.000232799	-0.940024	-0.378077	4.0678	4.72685	green	turquoise	turquoise
RB1CC1	2.22825	8.84398	0.0533542	-0.00518746	0.583042	3.79085	3.50192	grey60	magenta	darkorange
ERP44	3.20367	12.8255	0.00702472	0.207904	1.0726	3.77433	3.13408	greenyellow	magenta	lightgreen
ALAS1	-6.09122	13.7697	2.99112e-05	-1.12808	-0.539856	2.74563	3.5796	turquoise	turquoise	turquoise
BIRC3	4.94246	13.6484	0.000233189	1.75674	4.46184	1.85843	-1.25086	brown	blue	turquoise
AKAP11	6.49572	13.9172	1.45283e-05	0.743355	1.47684	4.33211	3.22201	darkgreen	blue	yellow
GLRX2	-2.43726	11.6217	0.0319092	-1.16232	-0.0629813	0.688792	1.30144	midnightblue	yellow	grey60
SNAPC1	-2.54388	12.7385	0.0247877	-1.91743	-0.154328	0.494616	1.5305	cyan	yellow	turquoise
DERA	-5.97848	9.2006	0.000190353	-1.58878	-0.718599	1.52533	2.67902	blue	turquoise	blue
STRAP	-8.35162	13.5324	1.05132e-06	-1.28734	-0.759883	3.31328	4.3369	cyan	yellow	brown
ABCC2	1.86064	9.93392	0.0926153	-0.0980512	1.08551	-0.999624	-1.49335	skyblue	purple	orange
PLEKHO1	1.70043	13.7201	0.111595	-0.138302	1.18707	3.61193	3.08754	black	black	yellowgreen
GCLM	-8.11894	13.9253	1.1956e-06	-2.90047	-1.68778	1.13275	3.42687	turquoise	turquoise	orangered4
UBR2	4.85852	7.88055	0.00131336	0.475259	1.33831	4.15361	3.24682	brown	orange	black
EHD2	0.486424	13.7499	0.634328	-0.416989	0.661069	5.33015	5.20811	tan	greenyellow	pink
DEPDC1	-8.69062	9.40093	8.54255e-06	-7.47079	-4.40065	-3.65131	2.28441	blue	turquoise	brown
CCDC28A	3.05996	12.0343	0.00987058	0.205156	1.21862	0.597585	-0.114306	salmon	grey60	black
HSF2	-2.05452	12.3885	0.0616487	-0.478678	0.0132232	0.640107	0.872834	turquoise	turquoise	yellow
PHF20	5.08608	12.9156	0.000213051	0.245778	0.609166	3.34302	2.91555	salmon	brown	black
NR1H3	9.63293	13.7116	1.76933e-07	1.78249	2.80618	1.56245	-0.731882	brown	blue	navajowhite2
TYMP	3.22766	9.36829	0.00983925	0.482942	2.70152	1.72155	0.129317	purple	blue	plum1
NCAPH2	-6.40433	10.86	5.35519e-05	-1.18639	-0.57879	1.89806	2.78065	green	turquoise	brown
TOMM34	-9.80866	13.8237	1.32488e-07	-2.16397	-1.38665	1.79955	3.57486	blue	turquoise	brown
SEC63	1.9077	11.9967	0.0806489	-0.0934148	1.40773	2.94363	2.28647	tan	greenyellow	steelblue
KPNA6	-5.7001	10.4778	0.000166206	-0.864959	-0.380938	4.50243	5.12537	green	yellow	turquoise
VIM	-1.13202	13.722	0.277021	-0.370393	0.114797	8.54385	8.67165	magenta	grey	blue
FAS	5.22021	12.177	0.000204594	0.783442	1.90284	1.21364	-0.129502	yellow	brown	pink
RNASET2	7.05533	12.4103	1.10728e-05	2.02416	3.8234	1.46105	-1.46273	yellow	brown	skyblue3
CD44	0.605157	13.1531	0.555372	-1.07328	1.90992	1.73418	1.31586	grey	green	skyblue3
AGPAT4	6.46249	12.659	2.41032e-05	0.774489	1.55554	2.84558	1.68056	yellow	brown	green
BTN3A1	13.1842	10.6965	5.93391e-08	1.63169	2.28838	2.54935	0.589323	brown	brown	black
MIPEP	-12.6637	11.4998	4.1842e-08	-1.18264	-0.833995	0.318502	1.32682	turquoise	turquoise	darkorange2
PRKCH	2.85603	12.0142	0.014445	0.0830494	0.617141	4.77549	4.4254	greenyellow	brown	green
IFNGR1	5.67641	8.30344	0.000407737	0.927893	2.18414	3.89933	2.34331	yellow	blue	blue
B4GALT7	-1.70267	13.6969	0.111203	-0.573909	0.0665362	2.37197	2.62566	lightcyan	green	red
VRK2	-9.40974	13.4906	2.68109e-07	-1.41708	-0.88947	1.07967	2.23294	turquoise	turquoise	brown
TNFRSF1B	8.48637	11.8955	2.17222e-06	1.01111	1.71057	5.1503	3.78946	brown	blue	blue
VEZT	-1.46026	8.34898	0.180801	-0.552295	0.122118	3.84349	4.05858	midnightblue	yellow	turquoise
POU2F2	-0.0957427	11.6415	0.925353	-1.51523	1.38809	-1.88775	-1.82418	black	green	lightcyan
BRD9	-3.45713	8.59784	0.00770717	-1.04734	-0.215246	2.68073	3.31202	green	red	brown
SNX1	4.08599	13.5511	0.00118533	0.410866	1.32475	4.12076	3.25295	tan	greenyellow	black
TBPL1	-2.12356	10.2045	0.0591238	-1.18024	0.0267625	0.901379	1.47812	cyan	yellow	turquoise
ARNTL2	-5.29742	10.5487	0.000291676	-2.79151	-1.14668	1.77586	3.74495	blue	turquoise	brown
BCLAF1	0.327697	11.1157	0.74923	-0.466762	0.630309	4.24859	4.16681	red	pink	green
SLC39A9	2.81097	8.55946	0.021348	0.0557087	0.534173	4.33054	4.0356	red	magenta	darkgreen
ANK1	3.06709	9.48681	0.012629	0.920418	5.94399	-0.0931362	-3.52534	darkred	orange	pink
TFB1M	-8.57608	11.9076	1.93456e-06	-2.07093	-1.23126	-0.976499	0.674596	turquoise	turquoise	turquoise
RABEP1	-5.86729	11.2224	9.98238e-05	-0.550873	-0.25085	3.40637	3.80723	pink	turquoise	indianred4
HMGB3	-11.9775	9.05495	7.409e-07	-2.60908	-1.78075	0.683017	2.87793	blue	turquoise	brown
NUP160	3.16395	13.1192	0.00739455	0.272278	1.44112	3.84576	2.98907	brown	blue	darkturquoise
BAK1	-7.8591	9.57566	1.77773e-05	-2.1267	-1.18276	-0.390406	1.26432	turquoise	turquoise	brown
IKZF2	5.86894	9.43586	0.000197947	1.90522	4.26802	0.796611	-2.29001	brown	blue	blue
GRN	6.15119	13.9487	2.55468e-05	0.805887	1.66919	6.21354	4.976	salmon	brown	lightyellow
FAM13B	7.71112	12.4418	4.37977e-06	1.06728	1.90335	2.58505	1.09973	greenyellow	blue	sienna3
ARHGAP31	6.58985	12.4138	2.18386e-05	0.424941	0.842431	5.51289	4.8792	yellow	blue	greenyellow
CENPQ	-1.51613	13.9141	0.151873	-1.42895	0.245783	-0.973576	-0.381994	midnightblue	yellow	blue
SARS	-4.44845	12.1762	0.000767651	-1.01339	-0.347771	4.45733	5.13791	green	turquoise	grey60
RANBP3	-1.44419	8.50774	0.184482	-0.592642	0.133284	2.89727	3.12695	pink	red	turquoise
ARID4A	5.91194	11.8364	7.5293e-05	0.728634	1.58123	2.43723	1.2823	tan	blue	salmon4
PNPLA6	-2.12653	12.5937	0.0538456	-0.713967	0.00680882	3.93353	4.28711	black	green	green
IFT88	1.24334	8.49378	0.246964	-0.307748	1.04392	1.01015	0.642062	grey60	pink	cyan
ALG1	-5.39052	9.53279	0.000360107	-1.42023	-0.585595	1.04622	2.04914	turquoise	turquoise	grey60
ZCCHC8	0.119508	12.9551	0.906706	-0.25721	0.287322	2.18866	2.17361	red	magenta	grey60
ABCF2	-9.41973	8.48574	8.85825e-06	-1.56973	-0.957227	1.59548	2.85896	black	turquoise	grey60
CHPF2	-1.97342	10.2226	0.0760823	-0.76239	0.0451007	4.04378	4.40242	turquoise	red	red
FUT8	-0.886916	13.899	0.390213	-0.727941	0.302232	3.33011	3.54296	green	tan	pink
UBA6	-2.29962	9.0857	0.0467684	-1.092	-0.00975223	3.52492	4.0758	midnightblue	yellow	orangered3
GAB2	7.65317	13.9505	2.33639e-06	0.709584	1.26242	4.99517	4.00917	purple	brown	darkgreen
ATP6V0A1	5.54547	11.2433	0.000160632	0.543052	1.25469	3.31318	2.4143	brown	greenyellow	brown
PIAS1	2.73032	12.3313	0.0178744	0.131463	1.1551	3.2032	2.55992	darkgreen	blue	greenyellow
SLC4A7	-9.47881	12.0079	6.33243e-07	-2.68135	-1.67912	2.44671	4.62694	lightcyan	turquoise	red
APBA2	-3.00869	13.7065	0.00957592	-3.20247	-0.533714	-1.09281	0.775277	turquoise	green	salmon
MAP2K3	1.22182	10.5875	0.248282	-0.498299	1.72867	2.66133	2.04615	tan	blue	purple
TMSB10	-5.55271	13.7268	7.65379e-05	-1.58493	-0.700506	6.9422	8.08492	green	turquoise	brown
ASTE1	0.131307	12.8013	0.897573	-0.436725	0.493154	0.212828	0.184614	grey	tan	purple
RNF19A	-1.08295	13.094	0.298369	-0.886705	0.294271	2.89276	3.18897	turquoise	green	salmon
PEX3	-1.26925	13.925	0.225156	-0.61642	0.158227	1.09432	1.32342	midnightblue	tan	turquoise
GABARAPL2	3.84261	7.43574	0.00566239	0.47263	1.93958	3.35616	2.15005	darkred	orange	red
SH3YL1	7.30377	13.1311	5.63549e-06	0.71995	1.32388	1.84495	0.823034	salmon	brown	yellow
FAM136A	-13.9723	13.0094	3.27334e-09	-2.26737	-1.66015	1.16182	3.12558	blue	turquoise	yellow4
VCL	-0.861803	10.2293	0.408544	-0.359327	0.158451	6.30695	6.40739	red	grey	brown
DEPDC1B	-7.08535	7.71544	0.000123414	-6.35578	-3.21934	-3.43069	1.35687	blue	turquoise	brown
DAPK2	0.26107	13.9895	0.797843	-1.39968	1.78763	-2.02783	-2.2218	black	green	red
NSMAF	-9.91099	11.5235	5.5254e-07	-1.23092	-0.785578	2.42582	3.43407	green	turquoise	purple
ADSS	-1.62026	13.6011	0.128121	-0.668065	0.0939729	3.95383	4.24088	midnightblue	yellow	antiquewhite4
TIMP2	5.93689	11.9511	6.96638e-05	0.789676	1.70599	5.37197	4.12414	tan	brown	tan
RFC1	-3.74753	13.4336	0.00231234	-0.64626	-0.1746	3.23738	3.64781	midnightblue	yellow	yellow
TBC1D23	0.108638	11.8331	0.91531	-0.408519	0.451325	2.74896	2.72756	darkgrey	pink	grey
CUL3	-3.95708	13.743	0.00148069	-0.936765	-0.277475	2.76168	3.3688	pink	tan	turquoise
TUBG2	5.53579	11.9972	0.000128771	0.641067	1.47326	1.48578	0.428613	brown	brown	darkorange
RPL26L1	-6.14242	8.17285	0.000253273	-2.12358	-0.96741	-1.22124	0.324259	turquoise	turquoise	cyan
FLT4	-1.7995	13.9158	0.0936539	-1.86468	0.163764	1.83022	2.68068	black	green	coral2
NSUN2	-11.491	13.6716	2.08749e-08	-1.51723	-1.03903	3.0941	4.37222	blue	turquoise	magenta
FBXO42	3.43647	11.6028	0.00516022	0.140527	0.632539	2.78977	2.40324	salmon	brown	yellow
MFAP3	2.72801	10.5428	0.0203444	0.101253	0.970771	3.30312	2.76711	greenyellow	magenta	yellow
MRI1	-1.39023	11.577	0.190608	-0.97365	0.217007	1.29123	1.66955	black	red	blue
METTL1	-3.9598	8.46296	0.0037345	-1.57638	-0.423019	0.00328412	1.00298	blue	turquoise	magenta
AGA	3.64228	10.3956	0.00424245	0.261964	1.07664	1.3651	0.695797	yellow	blue	brown
PI4K2B	-2.65274	12.8252	0.0200967	-1.64813	-0.16747	0.0672949	0.975096	pink	yellow	plum
BOD1L1	6.79744	11.3765	2.50268e-05	0.597653	1.16662	4.1927	3.31056	yellow	brown	yellow
MAT2B	-1.02926	7.62411	0.334899	-0.49493	0.191275	3.33052	3.48235	pink	yellow	turquoise
TLL1	-1.05147	9.30569	0.319578	-3.16627	1.14998	-2.49701	-1.48886	magenta	yellow	green
EDC4	-6.35699	10.3793	7.00711e-05	-0.869408	-0.419775	3.32584	3.97043	green	red	royalblue
TRIO	0.30709	11.9457	0.764062	-0.241331	0.320474	5.34538	5.30581	red	black	yellow
VCAN	9.85456	13.366	1.67827e-07	5.3637	8.36502	6.28499	-0.579373	yellow	blue	white
CLEC16A	1.06222	10.6699	0.311588	-0.184481	0.526139	2.69211	2.52128	magenta	midnightblue	thistle1
MSR1	3.1681	11.5526	0.00845586	0.955845	5.22487	-0.310595	-3.40095	yellow	brown	thistle1
ZFYVE16	1.68035	10.8501	0.121416	-0.112831	0.835998	3.23516	2.87358	greenyellow	pink	yellow
RIPOR1	1.88352	13.6947	0.0810415	-0.0638738	0.969237	4.16755	3.71487	tan	greenyellow	darkmagenta
RAI14	-4.84662	12.3432	0.000369637	-0.892787	-0.340199	5.32764	5.94413	blue	turquoise	steelblue
PNKP	-0.76387	9.333	0.463818	-0.6724	0.331549	2.38577	2.5562	darkturquoise	red	turquoise
PHLPP2	-2.53778	12.6866	0.0251373	-0.955031	-0.0755272	1.37663	1.89191	blue	turquoise	brown
SPDL1	-9.43882	9.85161	3.00557e-06	-3.78788	-2.33868	0.0788015	3.14208	blue	yellow	purple
STAU2	1.64192	9.71907	0.13252	-0.0919408	0.59939	3.02527	2.77155	greenyellow	magenta	green
PQLC2	-5.7741	13.9957	4.82241e-05	-0.973494	-0.446152	0.315929	1.02575	turquoise	turquoise	turquoise
CTNS	1.12993	7.51601	0.293273	-0.200069	0.576158	1.90788	1.71984	magenta	black	yellow
PHF23	-6.96697	12.9507	1.00159e-05	-1.23361	-0.649465	2.29768	3.23921	turquoise	turquoise	turquoise
INPP4A	-0.131112	13.067	0.897684	-0.271455	0.240376	2.94258	2.95812	green	green	cyan
PSMA4	-7.55727	9.74469	2.23556e-05	-1.81078	-0.983881	3.00068	4.39801	blue	yellow	brown
LSG1	-8.36433	13.0247	1.35071e-06	-0.954284	-0.562579	3.14968	3.90811	blue	turquoise	turquoise
PARP3	0.851735	12.0265	0.411001	-0.236863	0.541028	1.22312	1.07103	red	darkgrey	darkred
THAP3	-4.59063	10.4294	0.000891519	-1.46949	-0.51273	0.225496	1.21661	turquoise	turquoise	turquoise
TDP1	-14.8952	13.9745	5.72445e-10	-2.37323	-1.77571	0.687555	2.76202	blue	turquoise	turquoise
AIFM2	-9.92855	11.0556	7.6229e-07	-2.68708	-1.71239	-1.76985	0.429887	turquoise	turquoise	darkorange2
SPATA7	4.2094	11.8981	0.0012339	0.407712	1.28439	0.768895	-0.0771554	salmon	grey60	black
MED17	-6.21266	12.0058	4.49039e-05	-1.21702	-0.585058	-0.368418	0.532623	blue	turquoise	thistle2
RETSAT	-1.47271	10.6386	0.169788	-0.64628	0.129408	2.66825	2.92669	black	green	black
CAPG	-1.94787	8.71533	0.0843027	-1.99798	0.154106	1.64773	2.56967	turquoise	turquoise	lightcyan1
AP2S1	-9.85889	11.5204	5.84957e-07	-2.01878	-1.28521	2.61024	4.26224	turquoise	turquoise	brown
DCUN1D1	1.2899	8.55069	0.230876	-0.354619	1.27824	2.44332	1.98151	darkred	orange	turquoise
JADE2	3.15426	10.6394	0.00953428	0.212309	1.20628	3.16149	2.45219	tan	blue	green
TRIT1	-3.80115	13.2472	0.00213384	-0.589025	-0.162632	1.59668	1.97251	green	turquoise	orange
CUL7	-0.223934	13.1963	0.826238	-0.390956	0.317418	3.24484	3.28161	black	black	red
CTNNA1	0.175713	12.2324	0.863395	-0.291997	0.343343	6.59668	6.57101	red	red	skyblue
PHKA2	4.60522	9.94422	0.000986633	0.402278	1.15753	2.61249	1.83259	brown	greenyellow	red
CNTLN	3.61626	12.7618	0.00322152	0.257986	1.02725	2.08799	1.44537	brown	magenta	blue
HSPA5	-2.20757	13.7346	0.0448134	-0.785976	-0.0106245	6.20754	6.60584	grey	grey	brown
GEMIN8	-0.263269	13.1445	0.796425	-0.451923	0.353644	0.854635	0.903774	black	green	paleturquoise
OFD1	6.7388	12.3778	1.77685e-05	0.529747	1.03347	1.67826	0.896656	purple	brown	blue
PREX2	-0.0705849	7.78805	0.945507	-0.582233	0.547808	4.83767	4.85488	red	pink	paleturquoise
WDR37	1.72662	9.56469	0.116322	-0.0625116	0.481391	2.91789	2.70845	purple	brown	blue
YTHDC2	1.74661	13.6206	0.103204	-0.0629065	0.607115	3.37497	3.10287	purple	blue	blue
CTPS2	2.49772	10.8052	0.0299741	0.0370029	0.596281	2.12736	1.81071	lightgreen	black	blue
ATP6V1H	-4.04408	9.89305	0.00239771	-0.945808	-0.273196	1.97865	2.58815	black	turquoise	yellow
POLR2B	-9.07254	9.26967	6.53406e-06	-1.34084	-0.807529	4.20272	5.2769	green	yellow	turquoise
FAM214A	3.95564	8.72921	0.00353328	0.396246	1.46668	2.00176	1.0703	greenyellow	blue	darkgreen
ARAP2	4.13604	9.11914	0.00246588	1.21094	4.12184	0.463295	-2.2031	white	blue	turquoise
TPR	3.87649	13.9454	0.00168901	0.162933	0.566863	5.91134	5.54644	red	blue	pink
KIAA0556	4.6228	13.9652	0.000397475	0.423123	1.15589	2.59202	1.80252	royalblue	purple	blue
DTNBP1	2.38473	13.5448	0.0323203	0.0606189	1.17937	0.437673	-0.182319	tan	greenyellow	lightyellow
ANO2	14.2216	12.4479	4.56466e-09	3.22867	4.39147	5.20607	1.396	brown	brown	blue
C12orf4	-5.05326	13.6605	0.000189991	-1.34808	-0.543395	1.41292	2.35866	midnightblue	yellow	darkturquoise
SCML1	-0.851923	13.685	0.408919	-0.768405	0.332187	0.463201	0.681311	pink	yellow	orangered4
WWC3	5.5887	13.6771	7.28264e-05	0.489429	1.10124	4.51675	3.72142	yellow	brown	yellow
MAP4	0.347184	12.6671	0.734153	-0.24172	0.333994	6.15515	6.10901	red	salmon	brown
GOPC	1.372	12.484	0.194216	-0.134719	0.59826	2.43773	2.20596	greenyellow	pink	yellow
USP28	-6.34717	11.3463	4.75024e-05	-1.00136	-0.487122	1.90637	2.65062	turquoise	turquoise	orange
TSPAN17	-4.69444	9.91511	0.000868501	-1.27912	-0.455063	2.33805	3.20515	turquoise	turquoise	blue
NOP16	-11.2837	13.4189	3.16558e-08	-2.60381	-1.76921	-0.0613601	2.12515	turquoise	turquoise	magenta
CC2D2A	8.17817	13.345	1.46976e-06	0.540368	0.926968	2.43507	1.70141	lightgreen	blue	blue
RRM2B	-2.36532	11.7829	0.0360586	-1.1131	-0.0445491	2.23339	2.81221	black	yellow	green
ZNF800	1.5434	13.6298	0.145628	-0.14961	0.910603	2.35716	1.97667	greenyellow	darkred	turquoise
SNX29	5.82249	13.0461	5.86629e-05	0.700116	1.52567	2.57478	1.46188	salmon	brown	cyan
MRPS10	-7.30353	10.2049	2.32032e-05	-1.67912	-0.895727	1.417	2.70443	blue	yellow	blue
RSF1	7.44176	9.31879	3.25155e-05	0.640655	1.1961	4.08056	3.16219	yellow	blue	lightyellow
VPS13D	13.5908	11.0925	2.91979e-08	1.00497	1.39291	5.14322	3.94428	purple	brown	black
CELF2	-1.76785	13.8746	0.0990601	-1.20165	0.116271	2.47049	3.01318	pink	yellow	turquoise
FAM120A	-3.06883	13.3103	0.00875906	-0.910525	-0.159229	4.39043	4.92531	turquoise	salmon	brown
R3HDM1	-1.57058	11.2122	0.144054	-1.54316	0.256204	1.77246	2.41594	pink	tan	brown
KITLG	-0.17306	13.0107	0.865268	-0.75151	0.640029	1.81825	1.87399	greenyellow	pink	orangered4
ERCC8	-2.48284	8.91936	0.035052	-1.10086	-0.0504414	0.269258	0.844909	blue	yellow	mediumorchid
ADAMTS6	-7.35007	10.1485	2.26328e-05	-2.2349	-1.19669	1.61685	3.33264	green	turquoise	turquoise
H6PD	9.17488	13.3614	3.89798e-07	1.1255	1.81629	4.92567	3.45478	brown	brown	midnightblue
VAMP3	-1.17472	11.2337	0.264408	-0.613157	0.185704	4.17487	4.3886	grey60	tan	blue
PER3	2.85904	9.11881	0.0185682	0.341189	2.90299	0.912821	-0.70927	brown	blue	skyblue3
LTBP1	6.69267	13.8035	1.09864e-05	1.78442	3.4708	6.35753	3.72992	brown	blue	floralwhite
RCN1	-3.96682	12.4738	0.00173866	-1.05952	-0.310293	2.58385	3.26876	black	green	blue
RFC2	-18.1826	13.9998	3.89671e-11	-1.77214	-1.39817	1.04301	2.62816	blue	turquoise	magenta
ARID1B	5.13876	11.7232	0.00026443	0.471926	1.16986	4.32573	3.50483	yellow	greenyellow	black
CLPTM1L	-5.54373	9.06285	0.00035051	-1.01913	-0.428885	3.90808	4.63209	blue	turquoise	turquoise
NEDD4L	4.91895	9.7904	0.000644777	0.637334	1.69846	3.28892	2.12102	white	blue	red
PPP1R3F	6.05495	13.7361	3.21338e-05	0.849	1.78298	0.0137646	-1.30223	magenta	brown	yellow
HEXB	2.11594	9.96628	0.0605267	-0.013823	0.530497	4.32356	4.06522	greenyellow	pink	black
PTCD2	-0.949836	13.678	0.358678	-0.449064	0.173823	0.990176	1.1278	green	turquoise	cyan
JKAMP	-1.34354	8.49334	0.213887	-1.14421	0.296383	2.03916	2.46307	darkgrey	yellow	turquoise
DKK3	7.24403	11.0616	1.6067e-05	2.10543	3.94142	6.96267	3.93924	brown	brown	sienna3
NFE2L3	-5.79682	10.0332	0.000171489	-2.08913	-0.929406	2.12147	3.63073	turquoise	turquoise	darkgrey
MCUR1	-2.80414	13.9975	0.0140672	-0.814606	-0.108525	1.50029	1.96185	cyan	tan	darkturquoise
LIMA1	0.869461	11.6291	0.402185	-0.28367	0.658193	5.35788	5.17061	red	blue	grey60
LETMD1	8.90046	13.991	3.89343e-07	0.596424	0.975158	2.64377	1.85798	purple	brown	black
SLC4A8	-4.6138	13.2701	0.000460484	-2.88504	-1.04748	-2.51699	-0.550733	turquoise	turquoise	lightcyan1
MAPK9	-2.36181	13.0951	0.0343309	-0.556814	-0.0250085	2.33268	2.62359	pink	yellow	red
BCAR1	-6.82323	10.0525	4.48965e-05	-1.33222	-0.676676	5.33619	6.34064	green	turquoise	bisque4
FAM160A2	6.86815	12.3464	1.49034e-05	0.635694	1.22374	2.93496	2.00525	lightgreen	brown	pink
HERPUD1	6.01404	13.0179	4.32039e-05	0.487171	1.03327	3.55992	2.7997	yellow	blue	sienna3
HOMER3	-4.54099	13.6957	0.000487181	-1.93605	-0.692124	1.72117	3.03525	black	green	darkgreen
POLQ	-11.148	10.6782	3.23937e-07	-5.62295	-3.76302	-2.37305	2.31994	blue	turquoise	brown
PIK3CB	1.53974	13.5363	0.146669	-0.182748	1.10236	1.95697	1.49716	tan	greenyellow	magenta
CYBA	-1.20001	11.0818	0.25516	-1.21903	0.358279	2.40391	2.83428	blue	turquoise	lightcyan
THOC3	-5.39711	13.8514	9.76522e-05	-2.29366	-0.988166	-0.688077	0.952838	blue	turquoise	orange
HEBP2	-3.84878	8.67115	0.00419649	-1.06967	-0.274834	2.89905	3.5713	blue	yellow	brown
MPHOSPH9	-6.16504	12.2668	4.39196e-05	-1.47692	-0.706964	1.7568	2.84874	green	turquoise	brown
PLEKHA5	3.01017	9.31153	0.0141691	0.194234	1.34541	1.88806	1.11824	salmon	brown	midnightblue
SIKE1	1.42617	9.70775	0.185175	-0.157956	0.713435	2.82095	2.54322	grey60	pink	yellow
RRP12	0.940277	8.9608	0.37173	-0.446265	1.08041	3.63241	3.31534	red	blue	darkolivegreen
FNIP2	15.4959	11.8992	2.98766e-09	2.25644	2.99561	4.61805	1.99203	yellow	blue	black
MSMO1	-4.59426	13.995	0.000417369	-2.41895	-0.879191	1.47091	3.11997	midnightblue	yellow	turquoise
TTC17	8.62591	13.4408	7.61363e-07	0.810257	1.34933	4.37945	3.29965	brown	grey60	darkorange
FOXN3	11.8146	10.1842	2.85144e-07	1.23934	1.81372	4.23036	2.70383	yellow	blue	yellow
AKR7A2	-6.61416	13.6729	1.30715e-05	-0.953836	-0.485915	2.1499	2.86978	blue	turquoise	blue
MRTO4	-13.1739	8.85004	4.07533e-07	-2.51278	-1.77466	1.66632	3.81004	blue	turquoise	magenta
NNAT	-2.92897	11.3916	0.0132627	-1.90461	-0.274185	-0.594696	0.4947	black	turquoise	violet
USE1	3.32735	14	0.00498355	0.17887	0.827693	0.623131	0.11985	tan	brown	red
LAMA3	7.9622	9.93011	1.28054e-05	2.04455	3.6356	3.75328	0.913204	purple	blue	navajowhite2
AP5M1	-0.100176	8.18602	0.922615	-0.585671	0.53672	2.33126	2.35574	grey60	lightcyan	brown
ANAPC4	-0.351586	13.3867	0.730621	-0.409747	0.294757	1.76922	1.82672	midnightblue	tan	greenyellow
TRAPPC3	-4.48068	9.61303	0.00129916	-0.82156	-0.273851	2.89663	3.44433	blue	turquoise	turquoise
THRAP3	-9.42543	9.17485	5.09571e-06	-0.602342	-0.369718	4.85818	5.34421	green	turquoise	yellow
PHPT1	-2.242	10.1773	0.0483958	-1.16406	-0.00498326	2.11647	2.701	turquoise	green	lightgreen
LY75	-1.15807	10.1324	0.273403	-1.07122	0.337661	-1.37439	-1.00761	turquoise	turquoise	blue
ARID4B	9.13673	9.91566	3.83733e-06	0.788112	1.29725	3.68786	2.64518	yellow	brown	darkred
OPN3	-1.66813	13.9187	0.117621	-1.51184	0.189405	-1.86524	-1.20403	black	turquoise	red
SDCCAG8	0.289756	13.3785	0.776445	-0.167089	0.219025	2.42186	2.39589	red	grey	orangered4
HHAT	10.3019	13.865	7.06101e-08	1.77582	2.71075	0.995188	-1.2481	yellow	blue	lightgreen
KIF1B	-0.427371	13.9767	0.67562	-0.342583	0.228756	3.95338	4.01029	pink	salmon	darkorange2
FOXC1	12.0995	13.7884	9.95883e-09	2.40756	3.44681	5.26841	2.34123	yellow	blue	ivory
TBC1D22A	1.03368	13.6377	0.319268	-0.206369	0.588505	2.79884	2.60777	lightyellow	black	blue
SYNE2	12.6653	12.0928	2.43242e-08	2.08301	2.94771	6.11289	3.59753	purple	blue	black
ATP9A	2.66372	13.9894	0.0185352	0.11332	1.05038	3.77884	3.19699	salmon	black	blue
FAM168A	14.6865	13.7929	8.21673e-10	1.00188	1.34511	4.07725	2.90376	yellow	brown	yellow
RELT	-1.25756	8.27251	0.242889	-1.23948	0.361429	0.843984	1.28301	turquoise	turquoise	royalblue
GALC	5.47872	12.1132	0.000136342	0.667348	1.54709	3.02737	1.92015	yellow	blue	lightcoral
NOP58	-5.55513	11.4698	0.000147165	-1.62811	-0.707375	2.45539	3.62313	midnightblue	yellow	magenta
SZRD1	-4.4967	11.5489	0.000803209	-0.630311	-0.217654	3.67351	4.09749	black	turquoise	blue
CUL1	-5.65228	10.504	0.000176293	-0.923488	-0.403694	2.94092	3.60451	cyan	yellow	turquoise
FAM114A2	1.98204	10.4942	0.0742673	-0.0448351	0.81106	2.82713	2.44402	purple	blue	midnightblue
CYFIP2	1.29903	12.7222	0.216984	-0.386895	1.54741	2.65363	2.07337	salmon	cyan	cyan
TAB2	0.856387	11.06	0.409955	-0.429036	0.976142	3.34171	3.06816	greenyellow	darkred	turquoise
GINM1	7.09813	12.7661	8.92123e-06	1.0078	1.89203	3.44556	1.99564	greenyellow	blue	black
EIF2AK2	3.22136	11.6655	0.00758515	0.323052	1.68674	4.28987	3.28498	darkgreen	magenta	cyan
USP36	0.297016	12.4385	0.771356	-0.381363	0.502294	3.07874	3.01828	grey	midnightblue	yellow
KMT2C	9.05174	12.488	7.68226e-07	0.798952	1.30263	5.0982	4.0474	purple	blue	yellow
CCDC85A	-2.61795	11.5162	0.0231347	-1.72245	-0.153699	-0.320517	0.617558	black	turquoise	orange
PUM2	3.43493	13.7344	0.00412479	0.299414	1.29976	4.27551	3.47592	tan	greenyellow	yellow
MRPL43	-6.86968	11.8401	1.84706e-05	-0.834615	-0.432219	2.093	2.72641	turquoise	turquoise	turquoise
HPF1	-3.26954	13.3612	0.00590157	-1.13155	-0.232631	0.234864	0.916956	pink	yellow	blue
ZFR	-1.66587	9.67451	0.127735	-0.451123	0.0661483	4.34559	4.53808	midnightblue	tan	green
ZNF280C	-0.967322	12.5461	0.351661	-0.812087	0.311045	0.593943	0.844464	green	tan	grey
TRAF1	9.35506	12.2951	6.04945e-07	1.9556	3.13899	1.46378	-1.08351	brown	blue	lightpink4
RC3H2	1.10228	8.81887	0.29951	-0.15457	0.446572	4.27643	4.13043	grey60	pink	red
TRAF3IP2	0.918984	13.0616	0.374764	-0.21973	0.545328	1.30233	1.13953	magenta	green	greenyellow
DCBLD2	-10.3122	13.0384	1.22488e-07	-2.53926	-1.65983	2.35717	4.45671	turquoise	turquoise	turquoise
SOAT1	-3.05101	13.3631	0.0090325	-1.13939	-0.196251	2.16541	2.83323	cyan	yellow	pink
PKP2	-0.222295	12.1345	0.827782	-1.39123	1.13334	-0.642175	-0.513231	greenyellow	grey	orangered3
GDI2	-3.40575	7.50444	0.0102158	-1.23984	-0.231821	5.30573	6.04157	green	yellow	blue
PRDM1	-0.187109	12.7371	0.854523	-1.83175	1.54031	-1.4169	-1.27118	black	green	lightcyan
ATG5	-1.65589	9.24095	0.131245	-0.548482	0.0838074	2.54999	2.78233	midnightblue	yellow	yellowgreen
TMCC3	3.67885	13.797	0.0025351	0.440892	1.67782	4.85172	3.79236	brown	brown	blue
PITHD1	0.357371	7.59505	0.73054	-0.780756	1.06399	2.9676	2.82598	darkred	lightgreen	maroon
MTA3	2.31933	9.92645	0.0430014	0.00959917	0.49097	2.44851	2.19823	magenta	purple	yellow
USP13	-3.8685	13.3876	0.00184134	-0.67768	-0.19292	1.77129	2.20659	blue	turquoise	brown
ATP11B	1.81789	13.9999	0.0905379	-0.0960461	1.1643	4.51031	3.97618	brown	magenta	sienna3
LAMC2	-2.69664	13.6659	0.0176677	-3.90155	-0.440296	-1.07576	1.09517	lightcyan	turquoise	violet
CDK14	-4.49775	13.9842	0.00050271	-1.36384	-0.483045	1.37677	2.30021	turquoise	turquoise	pink
SEC61A1	-7.66255	11.7294	6.68977e-06	-0.981844	-0.546228	5.66433	6.42836	blue	turquoise	brown
PPP1R12A	5.09368	12.9145	0.000210297	0.325011	0.80431	4.58283	4.01817	purple	blue	turquoise
CROCC	4.22716	13.1491	0.00096455	0.634629	1.95823	2.87057	1.57414	orange	brown	blue
POLR3E	-2.79038	8.73521	0.0216393	-0.768765	-0.0786112	2.89945	3.32314	green	turquoise	turquoise
ATP2B4	4.89121	13.6253	0.00025743	0.543351	1.39592	6.1968	5.22717	yellow	brown	cyan
RIOK2	-4.76403	13.9439	0.000305658	-1.08375	-0.410691	1.31917	2.06639	cyan	yellow	turquoise
YIPF1	-0.629748	8.72003	0.545004	-0.430607	0.243785	1.41821	1.51163	green	turquoise	red
NDC1	-6.02712	11.0577	8.40022e-05	-2.90191	-1.35014	1.73948	3.86551	midnightblue	yellow	magenta
FLYWCH1	2.66944	10.3767	0.0228315	0.095547	1.03248	3.28512	2.72111	royalblue	purple	pink
UNKL	-2.01821	7.16248	0.0824285	-0.851686	0.065373	1.78786	2.18102	turquoise	red	salmon
TBXAS1	2.75768	9.76281	0.020639	0.342985	3.27966	0.144586	-1.66674	red	brown	brown
PARP12	3.32995	11.2653	0.00650641	0.132142	0.643052	3.64606	3.25846	red	brown	brown
ALDH18A1	0.281454	13.4475	0.782647	-0.238034	0.309624	4.46586	4.43006	red	red	red
TARBP1	3.93551	12.5982	0.00180868	0.298831	1.03146	2.84235	2.1772	lightgreen	brown	brown
GATB	-5.78274	9.78543	0.000192508	-1.27242	-0.563078	0.926054	1.8438	turquoise	turquoise	ivory
MXD1	3.98682	9.25101	0.003003	0.721824	2.59745	2.75592	1.09629	brown	blue	turquoise
CDK17	-6.58092	11.7578	2.87957e-05	-1.05548	-0.529519	4.47348	5.26598	green	yellow	red
DNAJC25	-0.71162	12.358	0.489916	-0.70891	0.359	-0.555543	-0.380588	pink	yellow	turquoise
SLC2A3	9.80838	11.7548	5.23183e-07	3.00196	4.72165	5.57894	1.71713	yellow	brown	black
CTDP1	-0.0182026	12.0365	0.985775	-0.396533	0.38996	2.40305	2.40634	black	red	red
YBX3	5.35005	9.68452	0.000360805	0.659893	1.60902	6.68481	5.55035	yellow	brown	white
STYK1	-6.48139	7.95556	0.00019655	-2.36201	-1.12144	-0.495603	1.24612	blue	turquoise	yellowgreen
WNK1	3.42822	8.41082	0.00832677	0.387965	1.942	6.1656	5.00062	yellow	blue	greenyellow
CCAR1	-4.92003	13.2641	0.000264011	-0.714961	-0.279276	3.48999	3.98711	blue	turquoise	darkmagenta
OGFR	0.657321	11.5199	0.52389	-0.267015	0.496206	3.20953	3.09494	lightyellow	black	black
PIGV	2.48739	12.4772	0.0278998	0.0551185	0.807737	0.837312	0.405884	salmon	brown	green
PTPRU	1.40056	10.78	0.189466	-0.316675	1.41734	0.205423	-0.344909	lightyellow	black	darkgreen
SNRNP40	-8.41248	9.50402	1.04825e-05	-1.56733	-0.907246	2.78402	4.0213	green	turquoise	brown
QSER1	0.346699	13.8837	0.734016	-0.565452	0.783303	2.95658	2.84766	tan	darkred	darkorange2
MPC1	0.771857	9.5565	0.45886	-0.306276	0.627828	0.814486	0.65371	grey60	darkgreen	cyan
ACAA1	0.809467	8.40678	0.440554	-0.27408	0.574446	1.79423	1.64405	magenta	midnightblue	black
BCAT1	-2.18222	7.98368	0.0607205	-1.17145	0.0325173	5.57755	6.14702	midnightblue	yellow	brown
HDAC7	4.35829	8.1984	0.00228136	0.312155	1.00742	5.69429	5.0345	purple	brown	midnightblue
SPAG4	0.223934	11.4617	0.82675	-0.672595	0.825795	-0.193649	-0.270249	grey	green	red
NCKAP1	-0.531505	13.9905	0.603406	-0.508534	0.306557	5.10587	5.20685	grey60	tan	green
MRPS35	-5.76278	9.87459	0.000190983	-1.58704	-0.700898	1.7405	2.88447	cyan	yellow	darkmagenta
SFSWAP	-1.92638	9.04181	0.0860205	-0.578569	0.0461782	2.99559	3.26178	darkturquoise	red	yellow
TNK2	-2.82139	13.9971	0.0135978	-1.69617	-0.231073	1.20956	2.17318	black	green	blue
MON2	5.54724	12.1402	0.000121082	0.425612	0.975053	3.57083	2.87049	brown	blue	red
GPBP1	4.184	9.0813	0.00231581	0.297557	0.995977	3.89801	3.25124	darkgreen	magenta	green
DGAT2	3.1663	8.87152	0.0116405	0.569717	3.44279	-0.194607	-2.20086	brown	blue	magenta
ZNF112	-1.91536	9.98546	0.0844963	-0.643081	0.0486068	-0.157612	0.139624	black	turquoise	blue
CS	-8.5245	13.3947	8.94157e-07	-1.74965	-1.04382	3.73561	5.13234	blue	turquoise	brown
ELMO2	2.08485	13.7679	0.0562022	-0.00582035	0.389018	2.77757	2.58597	magenta	brown	greenyellow
WAPL	-1.79351	10.0061	0.103119	-0.66294	0.0716193	3.55171	3.84737	cyan	yellow	turquoise
VMP1	7.14907	9.4575	4.16034e-05	0.820524	1.57205	6.45137	5.25508	purple	blue	turquoise
APPBP2	2.17176	8.72829	0.0588667	-0.0204801	0.899667	3.5669	3.1273	darkgreen	magenta	greenyellow
POLD1	-12.6588	8.41177	9.09924e-07	-2.51243	-1.74367	1.26165	3.3897	blue	turquoise	royalblue
EIF4B	3.94324	13.4212	0.00158779	0.282958	0.963895	5.95058	5.32716	lightgreen	cyan	black
BICRA	1.8133	13.9658	0.0913284	-0.132868	1.58433	0.767094	0.041363	tan	greenyellow	yellow
SPHK2	-6.51886	11.1117	4.11444e-05	-1.68921	-0.837239	0.139594	1.40282	black	red	darkred
RPL18	-0.814873	13.7093	0.429074	-0.516997	0.232722	6.43506	6.5772	red	royalblue	blue
CA11	3.921	13.9923	0.00153843	0.653467	2.23178	-0.0427404	-1.48536	salmon	brown	yellow
ISOC2	-1.49044	13.7616	0.15867	-0.701017	0.126736	2.34354	2.63068	blue	red	lightgreen
U2AF2	-11.5458	10.8731	1.92899e-07	-1.24776	-0.847725	3.88616	4.9339	turquoise	turquoise	turquoise
EPN1	1.75424	9.10051	0.112914	-0.059253	0.471639	4.46139	4.2552	magenta	midnightblue	sienna3
MED29	6.16717	8.27397	0.00023425	0.344237	0.751661	2.82279	2.27484	yellow	blue	navajowhite2
AHRR	-5.27064	13.2173	0.000143232	-4.34122	-1.82002	-3.36399	-0.283367	turquoise	green	lightcyan1
ZNF275	1.05709	13.9066	0.30849	-0.130976	0.385239	1.91994	1.79281	magenta	green	darkgreen
MTMR1	-5.54452	13.9988	7.2276e-05	-0.986707	-0.436257	1.79992	2.5114	turquoise	turquoise	saddlebrown
GPC1	-1.31893	9.97485	0.216669	-1.43139	0.367131	0.564919	1.09705	black	green	cyan
ADCK1	5.22795	11.6365	0.000234456	0.479529	1.16893	-0.00324921	-0.82748	yellow	brown	greenyellow
HAGH	0.478609	9.51239	0.643026	-0.670696	1.03442	2.49204	2.31018	darkred	lightgreen	yellow
RNF4	-9.69855	10.0998	1.94922e-06	-1.37601	-0.862441	2.96043	4.07966	blue	turquoise	steelblue
CASP8	2.0693	11.1518	0.0625081	-0.0268702	0.89539	1.24285	0.808587	red	grey	purple
LIMCH1	8.77944	8.99475	1.04947e-05	1.71931	2.91301	3.95392	1.63776	yellow	brown	blue
INTS13	-9.9103	12.7199	2.40892e-07	-1.82649	-1.17149	1.71554	3.21453	blue	turquoise	darkmagenta
TM7SF3	-3.79581	12.2034	0.00247679	-0.750688	-0.203812	3.12781	3.60506	blue	turquoise	cyan
SPA17	-2.92759	9.46768	0.0159645	-2.16643	-0.285776	-2.71897	-1.49286	pink	yellow	blue
ST3GAL6	-2.50913	11.4589	0.0282689	-1.4272	-0.0968353	0.789656	1.55167	black	yellow	orange
CDON	11.3904	11.9722	8.82276e-08	2.97022	4.37576	3.94229	0.269304	brown	blue	greenyellow
TAF2	-3.19835	11.2486	0.00825728	-0.859673	-0.159917	2.93121	3.44101	midnightblue	yellow	turquoise
HIPK2	-2.32583	13.6894	0.0359406	-0.893733	-0.0352424	3.8303	4.29479	pink	salmon	green
TNPO3	-9.55141	12.3685	4.59554e-07	-0.932277	-0.586878	3.63905	4.39863	green	turquoise	magenta
RFXANK	-4.24386	10.9108	0.001405	-1.09123	-0.345406	1.58114	2.29946	turquoise	green	blue
TMEM161A	0.271714	12.6651	0.79022	-0.224948	0.289474	1.85029	1.81803	green	red	tan
LPAR2	2.32979	9.2186	0.0441203	0.0455764	2.75684	-0.555897	-1.95711	brown	brown	brown
CTSA	-2.17808	12.3865	0.0493908	-0.489819	-0.000764188	3.54254	3.78784	black	turquoise	yellow
SUGP2	-2.02295	9.09441	0.0734433	-0.718322	0.0395322	3.45746	3.79685	darkturquoise	red	turquoise
SLC12A2	-7.89192	13.3465	2.1893e-06	-1.82245	-1.04073	1.46585	2.89744	turquoise	turquoise	orange
SNX24	1.24528	13.9417	0.233554	-0.129119	0.48629	0.405337	0.226751	grey	grey	cyan
CNN2	-6.08771	11.0847	7.62197e-05	-1.47811	-0.693652	3.8545	4.94038	turquoise	turquoise	blue
ABCA7	2.12499	12.0985	0.0548628	-0.0243536	2.02016	0.873549	-0.124356	salmon	cyan	black
SNCAIP	3.39627	13.9975	0.00434595	0.423802	1.87648	2.56114	1.411	magenta	brown	yellow
DDX20	-8.18024	8.29834	3.00345e-05	-1.91958	-1.07943	1.15288	2.65238	cyan	yellow	turquoise
BTBD1	-2.34956	12.0586	0.0366474	-0.552722	-0.0209902	3.72666	4.01352	midnightblue	yellow	pink
FAR2	-3.08418	7.96382	0.0151043	-1.3629	-0.196233	2.44884	3.22841	turquoise	yellow	darkgreen
SBNO2	10.0157	8.66433	4.69266e-06	1.38041	2.19208	5.56738	3.78113	brown	blue	turquoise
PMS1	-0.390778	12.715	0.70243	-0.543044	0.377001	1.53041	1.61343	darkgrey	yellow	turquoise
HMG20B	-1.48322	13.9991	0.160177	-0.660664	0.120474	2.74802	3.01812	black	red	blue
CALCRL	6.57635	10.6766	4.59845e-05	1.45342	2.92385	7.74228	5.55364	brown	blue	white
TAF11	-1.91811	12.4492	0.0783217	-0.555272	0.0342292	1.93933	2.19985	turquoise	yellow	skyblue
ANKS1A	4.55859	9.67678	0.00113628	0.294246	0.861928	3.35492	2.77683	yellow	brown	black
AP3D1	-7.33012	10.4367	1.98733e-05	-1.20006	-0.642987	4.48613	5.40765	turquoise	turquoise	yellowgreen
ZNF76	7.60966	12.654	4.53752e-06	0.775965	1.39362	2.78544	1.70065	brown	brown	blue
SLC9A3R2	4.364	12.5186	0.000836173	0.610181	1.81592	4.68431	3.47126	tan	blue	greenyellow
NTHL1	1.28906	13.9437	0.218352	-0.182771	0.7329	1.60939	1.33433	black	black	greenyellow
UHRF1BP1	3.73151	10.3932	0.00365058	0.216728	0.851075	3.12608	2.59218	brown	blue	navajowhite2
GNAI3	-2.72662	8.82127	0.0237735	-0.872476	-0.0798908	4.40042	4.87661	green	yellow	brown
IPO5	-4.76096	13.9654	0.000306149	-1.04736	-0.396678	5.18997	5.91199	green	turquoise	darkturquoise
OAT	-2.54245	10.217	0.0287976	-1.00954	-0.0679597	3.68193	4.22068	blue	yellow	blue
WDR3	-6.92798	11.2691	2.20154e-05	-1.33887	-0.694692	2.8217	3.83848	green	turquoise	grey60
PKN2	-0.251481	11.6344	0.805829	-0.429058	0.34054	3.29757	3.34183	grey60	pink	turquoise
WDR18	-8.20226	10.6079	6.50316e-06	-1.72182	-0.990658	1.55964	2.91588	turquoise	turquoise	orange
TRAM2	1.77648	13.1438	0.0987931	-0.0668773	0.689727	5.43056	5.11913	brown	blue	green
NTN1	18.1809	13.8672	4.54887e-11	4.62013	5.85725	2.85018	-2.38851	brown	blue	pink
MCM10	-11.5489	8.06576	2.68363e-06	-6.51761	-4.35059	-2.40941	3.02469	blue	turquoise	brown
DGKA	2.9041	11.068	0.0142563	0.101724	0.736624	3.21409	2.79492	red	brown	pink
ANKRD44	5.97958	11.602	7.37741e-05	1.2834	2.76368	1.73673	-0.286814	purple	brown	turquoise
KARS	-8.37903	8.24895	2.60116e-05	-1.52139	-0.867405	4.17435	5.36875	green	turquoise	brown
ADAT1	-1.24005	9.58023	0.24447	-0.525187	0.151061	1.83779	2.02485	turquoise	turquoise	salmon4
PDIA5	-1.0852	10.3372	0.302494	-0.879241	0.301585	2.62393	2.91276	black	green	firebrick4
TBC1D22B	-0.965863	9.65635	0.357678	-0.604409	0.240095	1.39025	1.5724	black	turquoise	green
NDUFB4	-2.37942	7.83982	0.045202	-1.25745	-0.0174634	1.87322	2.51067	pink	yellow	brown
SPEN	3.97595	13.9149	0.00139514	0.452984	1.51544	4.63803	3.65382	yellow	greenyellow	turquoise
MYLK	10.8581	13.681	4.18764e-08	3.08187	4.60323	5.06901	1.22646	brown	blue	lightcyan
ZC3H15	-6.81799	13.644	9.55483e-06	-1.24151	-0.646219	2.91576	3.85963	midnightblue	yellow	darkturquoise
MAP2K4	0.293935	9.21749	0.775319	-0.384055	0.49924	2.4076	2.35001	darkgrey	lightcyan	brown
TMEM206	-7.46765	9.61137	2.66767e-05	-2.94293	-1.5846	-0.56573	1.69803	turquoise	turquoise	yellow
SLK	2.01453	12.7862	0.065483	-0.0232085	0.648633	4.69061	4.3779	brown	blue	pink
CYB5R4	0.766639	11.5269	0.45871	-0.345087	0.717143	1.04289	0.85686	pink	pink	steelblue
COL17A1	-0.94234	11.9429	0.364691	-1.61838	0.641498	-1.7259	-1.23745	black	green	pink
SEC61A2	-1.44474	13.6105	0.171158	-0.807973	0.158619	-0.441808	-0.117132	black	turquoise	turquoise
TLE2	8.81982	12.0907	1.29317e-06	1.2828	2.1236	3.52299	1.81979	salmon	brown	darkgreen
ASB1	-4.26762	8.35904	0.00247157	-3.42746	-1.0344	-0.724196	1.50674	turquoise	green	steelblue
FAM107B	-2.38762	11.8724	0.0344868	-1.10525	-0.0498821	4.31967	4.89723	blue	yellow	salmon
ME1	-6.51459	10.7071	4.92608e-05	-2.73328	-1.34933	-1.04588	0.995429	turquoise	turquoise	turquoise
TBC1D1	-0.790248	8.37036	0.451189	-0.578385	0.281454	3.81105	3.95952	grey	turquoise	indianred4
CDK13	5.32947	12.7814	0.000144851	0.213293	0.504947	3.88809	3.52897	brown	brown	red
MTHFD2	-6.64454	7.58315	0.000205481	-2.69889	-1.29828	1.90568	3.90426	midnightblue	turquoise	turquoise
SLC9A7	-1.46	13.5265	0.167124	-0.701267	0.134328	2.21701	2.50048	turquoise	turquoise	darkslateblue
FOXJ2	6.35783	13.9968	1.77686e-05	0.783538	1.58134	3.31438	2.13194	yellow	blue	black
YBX1	-5.08648	8.81895	0.000699804	-1.33769	-0.512332	4.95609	5.8811	green	turquoise	darkmagenta
PDE4A	3.78988	10.789	0.00309867	0.554674	2.10017	1.92456	0.59714	tan	blue	green
PPP2R5A	2.73178	13.9991	0.0162153	0.101125	0.840141	3.24261	2.77197	salmon	blue	blue
ELAVL1	-8.12128	13.9217	1.19371e-06	-1.28138	-0.745746	2.86861	3.88218	pink	turquoise	royalblue
TIE1	-0.957078	12.0461	0.357343	-0.680802	0.265116	6.45855	6.66639	black	green	blue
DIP2B	0.886997	13.1656	0.390996	-0.0981697	0.235231	4.01149	3.94296	red	lightcyan	green
SMARCD1	-8.35687	11.7136	2.82542e-06	-1.04744	-0.613278	3.40439	4.23475	blue	turquoise	blue
KDM4A	0.770164	13.7819	0.454203	-0.234502	0.496665	1.86076	1.72968	magenta	black	maroon
NFYC	4.67885	13.9968	0.000355334	0.226524	0.60999	2.51949	2.10124	yellow	blue	grey60
ASPM	-13.2386	12.5776	9.38058e-09	-5.7626	-4.14094	-0.485239	4.46653	blue	turquoise	brown
ELOVL1	-2.00208	9.04639	0.0761342	-0.8807	0.0533713	4.10655	4.52022	green	yellow	greenyellow
ZNRD1	-1.61572	8.7487	0.14158	-1.019	0.172038	0.789989	1.21347	turquoise	turquoise	violet
ZBTB11	-0.301957	13.8838	0.76716	-0.383066	0.288582	2.65675	2.70399	grey	yellow	grey60
ATXN3	16.4985	13.1378	3.64541e-10	1.36866	1.7806	3.21688	1.64225	yellow	brown	black
GOLGA5	0.240205	11.7728	0.814303	-0.25012	0.311953	3.14834	3.11742	pink	darkturquoise	red
LRRC40	-4.51178	13.9851	0.000489324	-1.52932	-0.54374	1.35818	2.39471	cyan	yellow	brown
ISOC1	-5.88613	9.26548	0.000207977	-2.43495	-1.0872	-0.383578	1.3775	cyan	yellow	magenta
EML1	-3.00821	13.2181	0.00991931	-0.852896	-0.140602	2.81261	3.30936	blue	turquoise	blue
TRMT11	0.932163	12.3938	0.369056	-0.284495	0.712575	0.66295	0.44891	red	pink	turquoise
THUMPD1	2.7524	13.8625	0.0156854	0.0710317	0.574622	3.48498	3.16215	red	magenta	brown
MSANTD3	-14.1012	8.79041	2.45102e-07	-2.43613	-1.76045	0.918425	3.01672	turquoise	turquoise	turquoise
KIF26A	9.22209	13.674	3.05077e-07	1.51885	2.44211	5.21368	3.2332	lightgreen	brown	blue
ATG2B	8.6084	11.8928	1.87692e-06	0.511946	0.859381	3.87277	3.18711	purple	blue	yellow
ARFGEF1	1.19483	8.22992	0.265447	-0.108423	0.343961	4.066	3.94823	red	lightcyan	green
ZFAT	-0.0366038	13.8563	0.971323	-0.277478	0.268175	1.07551	1.08016	black	green	turquoise
MTFR1	-9.47597	12.0966	5.99081e-07	-1.87821	-1.17647	0.903666	2.43101	turquoise	turquoise	brown
FECH	0.547097	7.20023	0.60085	-1.26634	2.03431	2.32739	1.94341	darkred	lightgreen	brown
MYO9A	17.1361	13.7981	1.07972e-10	1.23623	1.59052	4.19068	2.7773	purple	blue	midnightblue
DDX3Y	0.399667	13.9669	0.695447	-4.08434	5.95463	0.573806	-0.361335	skyblue	darkgrey	lightsteelblue1
PFKP	-6.50203	10.1469	6.43014e-05	-1.92425	-0.94346	4.71135	6.14521	green	turquoise	salmon
IDI1	-3.77262	12.0947	0.00262393	-1.37424	-0.368577	1.59669	2.46809	midnightblue	yellow	turquoise
SP100	5.58463	9.97311	0.000234899	0.305043	0.710281	4.43257	3.92491	brown	blue	white
KLF6	3.89055	12.5017	0.00199355	0.421186	1.48267	5.89519	4.94326	yellow	blue	thistle1
PLPP1	11.7494	13.6749	1.5769e-08	2.14391	3.10402	2.8505	0.226538	tan	blue	green
NEO1	19.0719	11.6876	3.62445e-10	5.23381	6.58841	0.519012	-5.3921	yellow	blue	green
TRAM1	1.35854	12.6563	0.198014	-0.223703	0.976138	4.58924	4.21302	greenyellow	pink	red
PHKA1	-7.60389	11.4234	8.44605e-06	-1.90412	-1.05224	0.334224	1.8124	turquoise	turquoise	turquoise
TNFRSF1A	5.26776	13.7073	0.00012757	0.456813	1.0864	5.47672	4.70511	brown	blue	lightgreen
CACNB1	-1.87054	10.9697	0.088308	-0.898451	0.0730688	0.117635	0.530326	blue	turquoise	turquoise
EVI5	3.40153	12.6333	0.00490854	0.317845	1.43334	4.12156	3.24597	brown	blue	plum1
STOML1	0.69975	13.9681	0.495573	-0.262563	0.516772	1.29989	1.17278	green	red	turquoise
PKM	-11.2375	10.8853	2.50914e-07	-2.51869	-1.69277	6.00414	8.10986	blue	turquoise	pink
DHX29	-5.34671	13.7044	0.000110848	-1.1599	-0.49479	2.74553	3.57287	midnightblue	yellow	darkturquoise
DNTTIP2	-2.06266	13.3506	0.0591617	-0.893456	0.0194815	2.9767	3.41369	midnightblue	yellow	turquoise
METTL22	-4.01735	10.4378	0.00224766	-1.34822	-0.389744	0.763319	1.6323	lightcyan	red	red
TP53BP1	3.74934	11.291	0.0030739	0.222355	0.84973	4.25693	3.72089	orange	cyan	yellow
TRO	8.09357	13.966	1.21567e-06	1.23976	2.13401	3.05187	1.36498	yellow	blue	darkgreen
RRP15	-3.96139	13.5299	0.00151088	-1.2539	-0.371173	1.35414	2.16668	midnightblue	tan	magenta
RHOA	-2.0875	10.6972	0.0616076	-0.37651	0.0106141	6.21483	6.39778	grey	yellow	pink
DHX8	-0.753588	12.7123	0.464826	-0.314633	0.152174	3.77787	3.8591	green	green	skyblue2
PRKCZ	6.4519	9.47513	9.35943e-05	1.64457	3.39979	1.90242	-0.61976	white	blue	greenyellow
IARS2	-6.29633	11.3287	5.14326e-05	-0.92391	-0.446538	3.43345	4.11868	cyan	yellow	darkorange2
SYT1	-1.87715	12.1755	0.0846598	-2.68635	0.197667	-3.88087	-2.63653	black	green	orange
NAV3	-13.7284	11.8619	1.21956e-08	-6.34183	-4.60261	-1.82535	3.64687	blue	turquoise	brown
IDH3G	-5.7416	10.8288	0.000138059	-0.920363	-0.409563	2.18496	2.84992	turquoise	turquoise	cyan
ROGDI	0.229647	13.1605	0.821897	-0.513107	0.635337	0.692384	0.631269	black	green	lightgreen
PDZD4	13.9742	13.7128	1.6871e-09	4.11337	5.60843	1.51362	-3.34728	brown	blue	skyblue
ROCK1	3.13344	12.1973	0.00848345	0.127481	0.705988	4.25277	3.83603	yellow	blue	turquoise
CBFB	-6.80033	10.4333	3.84355e-05	-1.66091	-0.844579	2.28957	3.54231	cyan	yellow	magenta
PDK3	3.65562	13.9501	0.00260977	0.335576	1.28912	1.39203	0.579679	purple	blue	blue
HYAL2	6.2361	7.85714	0.000268734	0.782576	1.70557	7.39068	6.14661	brown	blue	pink
HDAC4	6.75213	9.99953	5.0301e-05	0.772324	1.5331	2.82975	1.67704	yellow	brown	midnightblue
RASSF1	0.685786	9.04718	0.510038	-0.359136	0.67197	2.35269	2.19627	grey	grey	turquoise
FGFR3	10.0917	10.5434	9.5534e-07	3.63223	5.6723	3.81496	-0.837305	brown	blue	pink
IFI35	9.35193	10.9167	1.52332e-06	1.67022	2.69963	2.09455	-0.0903779	brown	blue	blue
HEATR6	-1.39216	10.5402	0.192549	-0.56035	0.127555	1.60019	1.81659	green	turquoise	lightcyan
COASY	-7.45813	13.6608	3.55495e-06	-1.17484	-0.649093	2.56308	3.47505	turquoise	turquoise	green
PLEKHH3	6.23103	11.0838	6.21824e-05	0.865941	1.81045	2.33967	1.00147	orange	brown	yellow
MEF2A	7.44358	11.8256	8.49494e-06	1.10927	2.02953	4.78669	3.21729	yellow	blue	greenyellow
OTUD5	3.01923	13.7044	0.00938076	0.0841704	0.499971	3.27611	2.98404	salmon	purple	paleturquoise
TFE3	1.57824	9.22175	0.148155	-0.107125	0.60759	3.4218	3.17157	tan	greenyellow	turquoise
TBC1D25	-0.0916971	8.83158	0.928985	-0.322174	0.297143	1.47666	1.48918	magenta	grey	yellow
ACSL4	-4.93531	10.6619	0.000489068	-1.38048	-0.526656	3.57635	4.52992	midnightblue	yellow	turquoise
INPP5A	2.95375	9.73647	0.0148444	0.0830366	0.600724	2.63849	2.29661	salmon	brown	blue
GPKOW	-0.49616	13.4406	0.627797	-0.464746	0.290674	1.81416	1.90119	lightcyan	red	turquoise
GRIPAP1	2.90608	13.3524	0.0119805	0.139182	0.937277	2.95328	2.41505	royalblue	purple	yellow
FTSJ1	-7.6493	11.022	9.86078e-06	-1.50031	-0.829967	2.44445	3.60959	blue	turquoise	magenta
PRR11	-21.0042	11.1003	2.74115e-10	-5.95153	-4.82366	-1.58849	3.79911	blue	turquoise	brown
ATP11A	2.68855	11.8831	0.0198685	0.134514	1.2911	4.94379	4.23098	yellow	blue	tan
POLR1A	-6.61378	8.56104	0.000122907	-1.33974	-0.652839	3.54139	4.53768	green	turquoise	darkolivegreen
LAPTM4A	6.00274	9.84876	0.000140082	0.74365	1.62452	4.95655	3.77247	greenyellow	blue	sienna3
TTC7A	3.15711	10.5447	0.00958686	0.177555	1.00948	2.69071	2.09719	brown	blue	greenyellow
IP6K2	-1.35029	10.7626	0.204632	-0.481254	0.115893	2.86829	3.05097	turquoise	green	yellow
SRBD1	-2.40403	10.2342	0.0365343	-0.605325	-0.0239209	1.62083	1.93545	green	tan	skyblue3
KIF2A	-3.62265	7.6683	0.00725861	-0.999453	-0.218369	2.6365	3.24541	turquoise	turquoise	orange
RASGRP2	7.0727	13.9955	5.58095e-06	2.62971	4.91887	0.822816	-2.95147	yellow	brown	yellow
PSME4	-2.25588	11.4698	0.0444906	-1.52589	-0.0225973	3.90948	4.68372	green	lightgreen	brown
IFT80	2.13445	10.5191	0.0572559	-0.0214758	1.18386	0.437821	-0.143372	grey60	pink	blue
SIRT2	-1.38279	13.7892	0.188713	-0.29572	0.0640808	3.23039	3.34621	black	turquoise	darkorange
ERLEC1	4.64963	10.8947	0.000723705	0.343682	0.962911	3.53431	2.88102	brown	blue	darkgrey
PPP2R5B	12.5281	12.9049	1.35062e-08	1.88714	2.67432	4.33872	2.05799	brown	brown	green
MAST4	5.31803	13.7953	0.000114095	0.66429	1.56437	5.2538	4.13947	brown	brown	salmon
ADGRF5	2.86893	13.7274	0.0125811	0.566968	3.95043	2.39601	0.137313	yellow	black	mediumpurple3
NUP133	-4.93821	9.70293	0.000643765	-0.931219	-0.350495	3.12918	3.77004	green	yellow	brown
NUCKS1	-2.62696	9.69278	0.0259163	-0.841031	-0.0672881	5.61783	6.07199	green	yellow	brown
VPS35	-5.32152	7.70947	0.000801526	-0.920162	-0.361227	3.88777	4.52847	cyan	turquoise	cyan
DNAJA2	-2.21261	10.8757	0.0492611	-0.754527	-0.0014607	3.52975	3.90775	green	yellow	turquoise
BCL3	9.88507	12.7723	2.39402e-07	1.53191	2.39076	3.31955	1.35822	yellow	blue	lightgreen
KCNAB2	11.3734	13.8403	2.09056e-08	2.17857	3.19255	1.51324	-1.17233	yellow	brown	tan
GAL	-13.7071	10.3446	5.76241e-08	-6.19794	-4.4714	-5.60476	-0.270087	turquoise	turquoise	brown
FUNDC1	-0.323346	8.68256	0.754084	-0.738673	0.554815	0.374927	0.466855	pink	darkgreen	yellow
RORA	6.81553	10.7699	3.2172e-05	1.01632	1.98957	3.09488	1.59193	greenyellow	magenta	red
TGFBR3	16.2691	13.5573	2.76709e-10	2.69017	3.51007	4.69571	1.59559	yellow	blue	black
HES2	-6.04071	13.9964	3.03841e-05	-6.23807	-2.96898	-3.7999	0.803618	turquoise	green	brown
ATP1B3	-7.07426	10.2189	3.03622e-05	-2.05306	-1.07172	2.76189	4.32428	pink	turquoise	turquoise
NEDD4	2.32806	12.076	0.0380804	0.0285984	0.854584	4.1072	3.6656	brown	magenta	yellow
PIGB	-0.036577	11.621	0.971443	-0.579712	0.560638	0.214564	0.224101	grey60	tan	brown
MAPK6	-7.48051	10.8012	1.36477e-05	-1.37572	-0.74912	2.30697	3.36939	blue	yellow	brown
GNB5	7.39101	13.9785	3.43032e-06	0.699738	1.272	2.25072	1.26486	yellow	blue	blue
RAB27A	3.17993	11.5835	0.00824978	0.415154	2.24539	2.66457	1.33429	tan	blue	greenyellow
HDHD5	-2.21748	12.0337	0.0465897	-0.844027	-0.00755546	2.09668	2.52247	turquoise	turquoise	red
UFD1	-3.73797	10.1257	0.00377695	-0.744867	-0.189088	3.05183	3.5188	turquoise	turquoise	darkolivegreen
LRP6	11.9393	7.93994	2.37355e-06	1.23906	1.83323	5.12355	3.58741	brown	blue	coral1
PHRF1	-1.96173	7.70379	0.0868179	-0.741437	0.0622816	3.26213	3.60171	turquoise	red	bisque4
NUCB2	3.30594	12.9793	0.0056934	0.23795	1.13584	3.84242	3.15552	yellow	magenta	brown
PFN2	-8.10816	12.0972	3.10739e-06	-1.99311	-1.14941	1.72919	3.30045	pink	turquoise	blue
SLC44A1	0.859685	10.6463	0.408904	-0.193715	0.440384	4.04998	3.92664	magenta	lightcyan	green
TMEM260	5.92796	9.62279	0.000169673	0.383671	0.849752	1.72077	1.10406	magenta	brown	green
SMG6	3.82505	12.1355	0.00237033	0.271219	0.987082	3.34553	2.71638	salmon	brown	blue
EXOC5	-4.64536	8.40463	0.00145149	-1.1045	-0.375784	3.04857	3.78871	cyan	yellow	lightcyan
CLTCL1	-0.356117	13.9969	0.727063	-0.604593	0.432414	0.227816	0.313906	turquoise	green	blue
FSTL3	-1.1406	12.8764	0.274807	-1.10125	0.340696	2.09	2.47028	green	turquoise	greenyellow
DGCR2	5.82985	13.1737	5.57393e-05	0.373376	0.812085	4.26143	3.6687	yellow	brown	plum2
RNF126	-8.49357	13.6297	8.22496e-07	-1.7041	-1.01558	2.0838	3.44364	blue	turquoise	thistle2
MNT	6.04839	10.9066	8.63093e-05	0.767416	1.64689	2.47521	1.26805	tan	brown	blue
ZXDC	7.96588	9.73582	1.43675e-05	0.683492	1.21706	2.99294	2.04267	brown	brown	saddlebrown
JMJD6	-1.19892	9.24042	0.260399	-0.655903	0.200315	2.0493	2.27709	lightcyan	turquoise	turquoise
POLB	-1.49985	10.0867	0.164285	-0.454887	0.08861	0.896079	1.07922	black	turquoise	green
ST6GALNAC1	7.3357	7.65592	0.00010127	3.09908	5.97357	3.72582	-0.810507	brown	blue	pink
WIPI1	-1.73153	12.6593	0.107635	-1.33602	0.14902	1.21063	1.80414	black	turquoise	darkseagreen4
GBA2	-4.51555	13.8487	0.000497507	-1.21152	-0.430701	3.94403	4.76514	green	green	salmon
NDST1	-4.02285	12.796	0.00149309	-1.69214	-0.508451	4.20969	5.30999	turquoise	green	lightcyan
AP3M2	-0.671805	10.2547	0.516557	-0.439043	0.235099	2.07853	2.1805	green	turquoise	coral1
PABPC1	1.38648	13.727	0.187707	-0.265414	1.23087	6.95772	6.47499	tan	salmon	lightgreen
TESK2	3.09019	8.87932	0.0131331	0.234744	1.52736	0.280445	-0.600606	salmon	brown	lightyellow
CFAP20	-2.92585	11.6921	0.0130138	-0.627146	-0.0908816	2.39577	2.75478	green	turquoise	thistle2
CSNK2A2	-3.68417	12.4226	0.00295671	-0.921572	-0.23824	3.74815	4.32806	pink	turquoise	darkgreen
PTPN21	3.40266	7.66748	0.00993463	0.134888	0.715756	2.14389	1.71857	magenta	brown	red
EIF2B3	-7.72674	8.04982	5.4173e-05	-2.30635	-1.24701	0.94271	2.71939	blue	turquoise	magenta
TCOF1	-7.9002	9.71474	1.56202e-05	-1.52439	-0.851601	2.94936	4.13736	blue	turquoise	purple
CDC42	-2.46791	7.14542	0.0422862	-1.1675	-0.0273572	4.99887	5.5963	green	yellow	brown
OSBPL3	-7.7037	9.36258	2.38992e-05	-4.51328	-2.47365	-1.03365	2.45982	turquoise	turquoise	green
RAD18	-7.22012	12.9628	6.85629e-06	-2.03579	-1.09787	0.809586	2.37642	blue	yellow	brown
ATP2B1	6.39545	10.3382	6.7804e-05	0.881999	1.81878	4.1077	2.75731	brown	blue	brown
NCK2	0.266428	13.4439	0.793952	-0.261519	0.335379	2.53121	2.49428	black	green	mediumpurple3
MAP4K4	-12.1036	8.9744	7.34232e-07	-2.26886	-1.55405	5.10001	7.01146	turquoise	turquoise	brown
MGAT4A	1.98548	13.9494	0.0671111	-0.0276548	0.713835	4.24621	3.90312	yellow	pink	pink
RPL31	1.70463	13.558	0.111059	-0.118635	1.024	5.79597	5.34329	red	lightyellow	black
WDR1	-6.59355	9.00402	9.98104e-05	-0.809185	-0.3958	6.13417	6.73666	green	turquoise	salmon
SNX13	4.46259	11.7114	0.000822795	0.354613	1.03488	3.2972	2.60246	darkgreen	magenta	darkorange
ARHGAP10	-0.442215	11.6657	0.666421	-0.376395	0.249722	2.19437	2.25771	green	grey	turquoise
RPS6KA2	9.33021	13.2485	3.4319e-07	1.25154	2.00388	6.13511	4.5074	yellow	brown	midnightblue
ING3	-1.59357	7.43426	0.15256	-1.74378	0.329786	0.779556	1.48655	grey60	lightcyan	green
VASH1	-0.572013	12.3258	0.577597	-0.959552	0.559563	4.20927	4.40927	lightyellow	green	midnightblue
LMCD1	18.0905	12.8799	1.54806e-10	3.30591	4.20354	5.017	1.26227	brown	blue	skyblue
BUD23	-3.44541	9.20628	0.00708475	-0.759925	-0.158782	2.44212	2.90148	green	turquoise	magenta
SEL1L	3.47732	9.46597	0.00645581	0.148685	0.690624	4.97644	4.55678	yellow	magenta	lightsteelblue1
TRIP13	-14.9342	8.61298	1.86898e-07	-6.19667	-4.55659	-1.72187	3.65476	blue	turquoise	brown
ATP6AP1	4.52377	11.5982	0.000759007	0.215822	0.619876	4.64927	4.23142	tan	brown	darkred
TCF3	-10.1879	12.347	2.28465e-07	-1.43648	-0.93161	3.55551	4.73956	turquoise	turquoise	royalblue
TRIB2	17.0035	13.7315	1.28759e-10	2.76255	3.56175	4.2439	1.08175	yellow	blue	yellow
DAZAP1	-5.9369	8.18653	0.000317356	-1.50784	-0.66659	3.61972	4.70694	lightcyan	turquoise	magenta
MBD3	-4.72082	9.51594	0.000933962	-1.43723	-0.511219	3.10111	4.07534	lightcyan	turquoise	turquoise
HLTF	0.29382	8.37397	0.776047	-0.308052	0.398819	2.47993	2.43454	green	lightcyan	steelblue
FAM50A	-7.24864	10.691	1.92493e-05	-1.60511	-0.855368	2.22663	3.45687	turquoise	turquoise	turquoise
FAM3A	1.92649	12.9764	0.0762298	-0.0316332	0.551889	2.01025	1.75012	royalblue	purple	midnightblue
CPSF1	-2.05556	7.98208	0.0739467	-0.758071	0.0436773	3.98973	4.34693	turquoise	turquoise	orange
CYBRD1	8.97664	13.6686	4.21359e-07	2.02778	3.30479	5.0799	2.41362	yellow	blue	sienna3
PDCD2	-8.05757	13.3765	1.70985e-06	-1.42281	-0.822516	2.51419	3.63686	midnightblue	yellow	turquoise
RDH11	-2.57675	7.74033	0.033679	-1.17371	-0.0616577	3.13518	3.75286	midnightblue	yellow	turquoise
PRKACA	-1.66191	13.6194	0.119366	-0.646793	0.0828812	3.13307	3.41503	pink	salmon	brown
ADGRL1	9.33783	11.44	1.08195e-06	1.97311	3.18268	4.33094	1.75305	yellow	blue	darkorange
ACTN1	7.26444	9.75368	3.10011e-05	0.701149	1.32463	7.71753	6.70464	brown	blue	green
ZFYVE26	-0.00443819	12.3205	0.99653	-0.236622	0.235657	3.40281	3.40329	darkturquoise	midnightblue	green
RPS6KA6	4.69734	13.8381	0.000353588	0.625315	1.67829	-0.463628	-1.61543	greenyellow	blue	yellow
EPN2	3.25215	11.7107	0.00713602	0.144306	0.735073	3.12677	2.68708	tan	brown	red
PTPN18	0.824775	13.0193	0.424354	-0.345946	0.773317	1.99016	1.77648	lightgreen	salmon	blue
LIMS2	8.45064	12.5829	1.53596e-06	2.63947	4.46075	5.74117	2.19106	yellow	blue	white
SPEG	19.2718	13.9252	1.94516e-11	4.47575	5.59736	4.19295	-0.843604	brown	blue	honeydew1
LNX1	3.98395	13.9995	0.00135824	1.00294	3.34216	-0.56048	-2.73303	yellow	brown	blue
ALDH3A2	2.42703	13.4292	0.0299662	0.0403295	0.675026	2.83051	2.47284	red	blue	black
TFRC	-8.96255	9.32236	6.96605e-06	-3.77473	-2.25964	2.71217	5.72936	turquoise	turquoise	magenta
SREBF1	2.27019	13.6492	0.0399639	0.0266876	0.98124	3.96869	3.46473	red	purple	blue
AFF4	1.56765	10.0535	0.14787	-0.110504	0.636342	5.01169	4.74878	darkgreen	darkred	turquoise
UBE2D1	-1.13041	13.9901	0.277313	-0.805559	0.249519	0.842615	1.12063	pink	tan	brown
MPP5	-1.25035	10.3681	0.238655	-0.602753	0.168097	2.32792	2.54525	grey60	yellow	magenta
RHOBTB1	-0.0937986	9.68659	0.927181	-0.591192	0.543629	2.52281	2.54659	black	green	blue
SMC1A	-4.69323	13.5246	0.000378525	-1.01247	-0.375895	4.0028	4.69698	green	turquoise	darkturquoise
HSD17B10	-3.91327	10.2407	0.00276985	-1.13193	-0.312252	2.34869	3.07078	green	turquoise	brown
MARK2	0.085731	10.3795	0.933312	-0.283268	0.306055	2.69985	2.68845	magenta	salmon	turquoise
HMMR	-9.88895	9.62595	2.36325e-06	-6.71525	-4.23494	-2.63929	2.8358	blue	turquoise	brown
CHFR	-0.501343	10.9335	0.62607	-0.577067	0.363079	2.85845	2.96544	blue	red	blue
P4HA2	-3.0741	12.9848	0.00888903	-1.22593	-0.213929	2.47134	3.19127	turquoise	turquoise	mediumorchid
NFATC3	3.18343	10.6244	0.00907445	0.1721	0.95414	3.40144	2.83832	brown	blue	greenyellow
TRNT1	-0.492489	12.4317	0.630956	-0.325015	0.204797	1.53054	1.59065	pink	tan	green
ACADVL	-2.11857	8.92214	0.0634484	-0.772164	0.0258231	5.13404	5.50721	green	red	green
STK10	-2.73781	9.7521	0.0213675	-1.68533	-0.170094	2.30119	3.2289	turquoise	turquoise	salmon
FBXW11	3.4225	12.584	0.00474205	0.0895358	0.398868	3.86491	3.6207	red	blue	turquoise
ACAP1	4.72564	13.7159	0.000343342	1.36798	3.64979	0.622502	-1.88639	purple	brown	red
CRMP1	3.72934	11.5	0.00308805	0.48928	1.88049	0.957101	-0.227782	red	brown	purple
EVC	1.60084	12.7867	0.133818	-0.109108	0.72937	2.54363	2.2335	lightyellow	black	blue
DERL2	-2.47093	7.7979	0.0393954	-0.998477	-0.0322184	1.91478	2.43012	cyan	yellow	turquoise
NDE1	-3.4437	11.6595	0.00505859	-0.529246	-0.118248	2.52661	2.85035	blue	turquoise	pink
MRVI1	11.4706	10.2039	3.71243e-07	5.64589	8.35893	3.49013	-3.51228	brown	brown	blue
TMEM38A	6.22924	12.9457	3.12994e-05	1.09025	2.24875	0.643892	-1.02561	tan	blue	greenyellow
AP1M1	-6.8478	10.7221	3.15467e-05	-1.66588	-0.853535	3.21788	4.47759	blue	turquoise	purple
PVR	-6.59258	13.2261	1.59413e-05	-2.33129	-1.182	3.96071	5.71736	green	turquoise	turquoise
XRCC1	-0.891409	7.94318	0.398906	-0.318233	0.140952	2.05314	2.14178	black	turquoise	blue
SCARB1	-10.8468	13.1948	6.02628e-08	-2.36354	-1.5794	1.58535	3.55682	turquoise	turquoise	black
MCM2	-21.1536	9.11817	4.62341e-09	-4.2998	-3.47049	0.610757	4.4959	blue	turquoise	brown
MOV10L1	3.33581	12.8752	0.00542984	0.335984	1.57447	2.27003	1.31481	red	cyan	red
PANX2	-3.13521	8.81215	0.0123338	-2.85373	-0.457085	-3.32731	-1.6719	black	turquoise	lightpink4
SELENOO	-2.91052	11.7131	0.0133633	-0.870067	-0.123933	1.45653	1.95353	black	green	red
ALPK1	12.6249	14	4.86224e-09	1.92956	2.71934	2.41879	0.0943357	brown	blue	blue
LLGL2	5.84337	13.8433	4.46548e-05	0.889705	1.92331	2.08291	0.676403	brown	blue	pink
PDE8A	1.35925	13.098	0.197012	-0.103012	0.453288	3.27722	3.10208	lightgreen	grey	black
CLCN4	-1.71396	13.4051	0.109551	-1.04343	0.118647	2.43357	2.89596	green	tan	saddlebrown
NLE1	-6.22644	7.54995	0.000319727	-1.72528	-0.785613	1.52606	2.78151	blue	turquoise	yellowgreen
SDHA	-7.87064	11.9949	4.45292e-06	-1.06258	-0.601811	3.69564	4.52784	blue	turquoise	lavenderblush3
SMARCE1	-0.766609	8.09654	0.465077	-0.771205	0.385779	0.968835	1.16155	pink	yellow	blue
GSDMB	4.5587	10.326	0.000961843	0.447881	1.29717	0.693725	-0.178798	brown	brown	green
KDM5A	4.78668	13.7065	0.000307055	0.260304	0.684495	4.56429	4.09189	purple	brown	red
PPP2R3A	0.123668	13.5578	0.903393	-0.499003	0.55987	1.75603	1.72559	black	green	midnightblue
FERMT2	-1.21418	11.8401	0.248341	-0.547663	0.156078	4.60501	4.8008	green	yellow	turquoise
PTGS2	11.1392	13.7478	2.90543e-08	3.82344	5.65078	7.65935	2.92224	brown	blue	yellow4
IGF2BP2	-4.54588	7.98384	0.00189434	-1.2631	-0.412706	3.59582	4.43372	blue	turquoise	steelblue
MAP3K13	6.40083	12.9464	2.38603e-05	0.63462	1.28167	2.0915	1.13336	brown	blue	bisque4
ST6GAL1	10.5479	8.60532	3.25923e-06	1.17112	1.81633	6.56282	5.06909	yellow	blue	darkseagreen4
FRY	9.31796	13.7596	2.56337e-07	1.2954	2.07171	5.26633	3.58278	brown	blue	green
PICALM	2.3667	11.8996	0.0357767	0.0460727	1.12738	5.63945	5.05272	brown	blue	turquoise
NSF	-1.77195	13.9844	0.0981809	-0.466384	0.0444197	2.24085	2.45183	turquoise	yellow	pink
CLASP1	6.81735	9.72346	5.32642e-05	0.421659	0.833462	4.50626	3.8787	brown	brown	red
MRPS34	-10.7865	10.0853	7.35513e-07	-1.97545	-1.29969	1.47321	3.11079	turquoise	turquoise	turquoise
NOTCH3	10.9599	12.6625	7.92527e-08	3.84635	5.74138	4.7743	-0.0195718	yellow	brown	coral1
CLNS1A	-2.0092	10.6824	0.0704607	-0.402159	0.019048	3.50361	3.69516	green	yellow	blue
TEAD2	-2.5351	11.5978	0.0267602	-0.995412	-0.073329	3.33978	3.87415	turquoise	green	brown
EED	-4.69945	13.9585	0.000344232	-1.53434	-0.572518	0.234771	1.2882	cyan	yellow	darkturquoise
TSG101	3.02642	7.63593	0.0173187	0.134108	1.02363	3.15348	2.57461	greenyellow	blue	lightyellow
NCBP3	4.6795	13.4975	0.000390319	0.139361	0.376736	3.68186	3.42381	purple	purple	skyblue
ATP2A3	7.07897	10.8126	2.24347e-05	3.84633	7.328	4.23587	-1.3513	brown	blue	greenyellow
CA12	6.14647	12.7692	3.79346e-05	1.24747	2.6035	0.430512	-1.49497	purple	blue	purple
MGLL	-9.88486	10.0521	1.69729e-06	-2.51276	-1.58886	2.37773	4.42854	blue	turquoise	yellowgreen
NTN4	-3.1049	12.0945	0.00903042	-2.3236	-0.408236	2.2203	3.58622	black	turquoise	red
BCS1L	-7.98613	12.2741	3.31003e-06	-1.74374	-0.997663	1.55474	2.92544	green	turquoise	magenta
NUAK1	9.30606	12.8237	4.59133e-07	1.54688	2.48393	5.53207	3.51666	yellow	brown	midnightblue
DPP8	1.2685	9.02494	0.236361	-0.196376	0.698244	3.31592	3.06498	darkgreen	pink	blue
SLC24A1	6.67591	13.242	1.39115e-05	0.702526	1.3729	2.54413	1.50642	purple	brown	cyan
ZNF532	6.45597	13.1792	2.01113e-05	0.490015	0.981875	3.70589	2.96995	yellow	brown	salmon
SCARF1	0.406112	9.78849	0.693396	-0.335104	0.483952	4.57123	4.49681	red	black	brown
LMAN1	-2.21697	11.5385	0.0475396	-0.66622	-0.00430301	4.67708	5.01234	midnightblue	yellow	darkgrey
HACD3	-5.43763	8.93955	0.000421967	-1.16119	-0.478389	3.81126	4.63105	midnightblue	yellow	turquoise
IPCEF1	5.86356	10.045	0.000155885	3.1247	6.95119	0.582959	-4.45499	yellow	blue	green
ZZEF1	1.51233	8.43861	0.166959	-0.108361	0.532377	4.49083	4.27882	red	greenyellow	green
ENO1	-11.7099	7.81747	3.12145e-06	-2.78898	-1.86813	6.27695	8.60551	green	turquoise	royalblue
MYDGF	-9.07771	12.2948	8.38631e-07	-1.35597	-0.832173	2.84332	3.93739	turquoise	turquoise	royalblue
ANO8	4.27643	11.3264	0.0012236	0.554037	1.72068	1.31317	0.175812	salmon	brown	darkred
TUBE1	1.76103	13.9975	0.100053	-0.0686535	0.698681	1.58328	1.26827	red	blue	grey60
ARHGEF10L	4.08604	12.9706	0.00129215	0.661255	2.14568	1.99291	0.589447	lightgreen	brown	blue
ACTR6	0.758248	12.2741	0.462614	-0.400686	0.830058	0.797811	0.583125	grey60	pink	brown
TIPIN	-11.6013	13.4774	2.15314e-08	-2.64727	-1.81862	-1.03765	1.19529	blue	turquoise	purple
SRI	-4.43875	13.0538	0.000661798	-1.06191	-0.366825	2.69368	3.40804	turquoise	turquoise	brown
EIF4G3	-2.08198	13.6798	0.0566269	-0.312138	0.00498131	4.12774	4.28131	pink	turquoise	green
NUP37	-6.52008	8.32062	0.000154808	-2.00038	-0.960255	0.844147	2.32447	blue	yellow	brown
SEMA3A	0.795641	13.9651	0.439556	-0.695453	1.51542	-2.33187	-2.74186	grey	green	brown
GTSE1	-18.3414	13.4457	6.63897e-11	-5.48315	-4.33105	-2.03022	2.87688	blue	turquoise	brown
TTC38	-3.12452	7.95394	0.0142341	-0.963682	-0.144776	1.63172	2.18595	turquoise	red	lavenderblush3
ACAT1	-7.22505	8.2549	7.704e-05	-1.66427	-0.862212	1.88403	3.14727	cyan	yellow	pink
GRAMD4	6.31087	13.7068	2.1163e-05	0.820609	1.66812	2.69358	1.44922	salmon	brown	black
CELSR1	12.4949	13.7461	6.85433e-09	2.84692	4.02929	5.19615	1.75804	yellow	blue	green
ZNF638	7.99075	12.0497	3.70515e-06	0.355356	0.621625	4.69505	4.20656	purple	brown	green
SLC25A40	0.0758573	12.7642	0.940709	-0.50385	0.54045	0.963928	0.945628	grey60	tan	red
TIMM21	-11.1939	11.2145	1.98126e-07	-1.6872	-1.13381	0.530917	1.94143	blue	turquoise	brown
RASAL2	3.31973	10.9463	0.0068782	0.210478	1.04013	3.4307	2.8054	skyblue	cyan	orange
VPS9D1	3.52181	12.2239	0.00409834	0.334316	1.41332	2.04767	1.17385	salmon	purple	darkred
ZNF37A	1.24307	13.0883	0.235649	-0.160666	0.596823	2.30585	2.08777	greenyellow	pink	grey60
MARK3	-2.43114	7.33756	0.0437832	-0.603347	-0.0111718	3.71923	4.02648	green	turquoise	turquoise
SLC25A3	-5.23238	10.1637	0.000363127	-1.24215	-0.501332	5.63311	6.50485	green	turquoise	blue
FNDC3B	3.37532	12.521	0.00521841	0.116254	0.5342	5.94233	5.61711	brown	blue	red
FOSL2	12.8445	9.60568	2.2931e-07	2.01215	2.86247	7.07992	4.64261	brown	blue	turquoise
FRYL	7.21231	13.9657	4.5415e-06	0.503321	0.929514	4.75934	4.04292	purple	brown	grey
TMEM131	2.39754	13.9117	0.0311146	0.0455359	0.822724	3.45452	3.02039	tan	greenyellow	pink
FSCN1	-6.38813	13.9131	1.73755e-05	-1.63357	-0.812	4.61594	5.83872	black	green	blue
ACTB	-2.98267	12.2961	0.011162	-1.04951	-0.164817	8.75262	9.35979	green	salmon	blue
MOCOS	7.93024	12.7539	2.78451e-06	1.29836	2.27326	0.0927722	-1.69304	yellow	blue	plum1
PLD1	1.20414	13.9594	0.248555	-0.188334	0.670217	3.92937	3.68843	lightyellow	black	brown
WDR62	-14.7288	13.5548	9.98442e-10	-5.15602	-3.84173	-2.21441	2.28447	blue	turquoise	purple
DLG1	0.353296	13.9832	0.729136	-0.251868	0.351195	3.58777	3.53811	pink	tan	coral2
RAB7A	-0.190269	13.6877	0.851891	-0.752453	0.630069	4.31826	4.37945	tan	salmon	turquoise
BCAP29	-2.44448	9.52045	0.0357148	-1.26952	-0.0544412	2.74822	3.4102	pink	yellow	turquoise
SEC31B	3.14315	13.4133	0.00751865	0.262226	1.40365	1.47384	0.640901	darkorange	purple	yellow
SART3	-3.17517	11.704	0.00822347	-0.689905	-0.127454	3.12274	3.53142	lightcyan	turquoise	turquoise
EXOSC7	-3.21806	13.9979	0.00619497	-0.85532	-0.171171	1.46839	1.98164	blue	turquoise	lavenderblush3
KIFAP3	5.59193	9.94771	0.000234712	0.422972	0.983982	2.40013	1.69665	greenyellow	blue	black
MKRN2	-1.99655	10.1101	0.0735005	-0.547301	0.029599	2.40999	2.66884	turquoise	yellow	blue
MCM6	-11.6562	13.9522	1.4076e-08	-2.36534	-1.62995	1.87478	3.87243	blue	turquoise	brown
REXO2	-4.28018	7.73353	0.00290496	-1.86176	-0.552957	2.57569	3.78305	midnightblue	yellow	turquoise
RBM7	0.388443	10.8109	0.705228	-0.48202	0.688087	1.41172	1.30868	greenyellow	pink	turquoise
RBMS2	7.49616	13.6105	3.43464e-06	0.944768	1.70494	5.67475	4.34989	brown	blue	green
BAZ2A	2.59896	12.7114	0.0223799	0.0787821	0.865649	4.7254	4.25319	tan	greenyellow	yellow
PTPN23	0.123782	12.9881	0.903383	-0.483845	0.542654	2.99103	2.96163	tan	midnightblue	darkorange2
MLH1	-4.38083	10.8571	0.00113199	-0.59318	-0.196032	2.67257	3.06718	green	turquoise	purple
UNG	-8.32907	12.2865	2.11463e-06	-1.29965	-0.761785	2.10092	3.13164	blue	yellow	black
KLHL20	6.66477	11.4867	2.86518e-05	0.789013	1.56114	3.47785	2.30277	yellow	blue	midnightblue
RGS11	7.66529	10.6878	1.15972e-05	1.92945	3.49159	3.10726	0.396741	brown	brown	cyan
SLC46A1	0.598958	13.6612	0.559003	-0.458066	0.811892	-0.53339	-0.710303	tan	blue	turquoise
PLXNA2	0.503355	8.4061	0.627639	-0.334139	0.522757	6.67783	6.58352	red	midnightblue	darkgrey
SPAG5	-15.6441	7.7909	3.65343e-07	-4.83182	-3.58528	-0.279448	3.9291	blue	turquoise	brown
ANKRD13A	2.1512	7.76674	0.0646702	-0.021321	0.570888	3.16709	2.8923	darkred	lightgreen	yellow
TPD52	2.68969	11.9912	0.0196921	0.281873	2.68721	1.82858	0.344043	yellow	blue	blue
ACACB	11.725	10.148	3.1696e-07	2.74363	4.0279	3.04614	-0.339624	brown	blue	blue
TRAF4	-5.90907	11.9435	7.29045e-05	-1.35885	-0.626442	2.04214	3.03479	turquoise	green	turquoise
PAG1	9.69284	11.3394	7.92188e-07	4.66292	7.38982	1.08375	-4.94262	yellow	blue	greenyellow
GPATCH1	2.57313	11.8947	0.0245498	0.0659817	0.799862	0.894109	0.461187	brown	blue	brown
NT5C2	2.34954	12.3727	0.0361592	0.0277568	0.70506	2.3703	2.00389	tan	blue	thistle2
MCAM	-6.60397	10.9824	3.87276e-05	-1.75474	-0.877341	7.15924	8.47528	green	turquoise	palevioletred3
MBNL3	1.24421	7.40182	0.251377	-0.891157	2.917	1.33471	0.321789	darkred	lightgreen	brown
XAB2	-0.187087	12.3991	0.854619	-0.328117	0.276053	3.06381	3.08984	darkturquoise	red	skyblue2
ARHGEF1	0.434537	7.74821	0.675746	-0.235518	0.344128	3.92367	3.86936	lightgreen	purple	salmon
STXBP2	-0.295411	10.9908	0.773186	-1.0241	0.781745	0.838816	0.959991	black	green	magenta
MAP2K7	0.096771	8.6301	0.925118	-0.425294	0.463048	1.85982	1.84095	magenta	salmon	turquoise
DGKD	5.05708	9.58752	0.000562723	0.553604	1.43485	2.74523	1.751	brown	brown	blue
CTTNBP2	3.23488	11.939	0.00719771	0.580848	2.98175	-0.366844	-2.14814	yellow	blue	mediumpurple3
RARB	-2.65718	12.9766	0.0197653	-0.820794	-0.0845694	2.73028	3.18296	black	turquoise	yellow
TOP2B	-2.12846	10.8573	0.0570515	-0.244036	0.00428373	4.42613	4.54601	blue	yellow	brown
TM9SF3	0.561803	13.973	0.58315	-0.443227	0.757755	5.2951	5.13784	darkgreen	pink	turquoise
NFKB2	7.8768	10.675	9.09314e-06	1.07835	1.91902	3.7444	2.24572	yellow	blue	turquoise
UBE2T	-8.89006	7.32314	3.51636e-05	-5.34132	-3.11265	-2.02055	2.20643	blue	yellow	brown
DNAJC10	-1.22517	13.5528	0.241379	-0.488289	0.133948	4.9847	5.16187	midnightblue	yellow	antiquewhite4
GTF3C1	-2.01423	9.86981	0.0720407	-0.590267	0.0302893	4.42609	4.70608	darkturquoise	red	turquoise
IL4R	5.62329	12.6741	9.12146e-05	0.683837	1.54071	4.76912	3.65685	brown	brown	blue
USP33	1.72055	11.9021	0.111198	-0.0818452	0.693771	3.42537	3.11941	darkgreen	pink	black
SNRPA	-15.5276	13.1518	7.68527e-10	-1.93735	-1.46459	1.62865	3.32962	turquoise	turquoise	purple
EXOSC5	-5.05895	9.15913	0.000646186	-1.55452	-0.595609	0.143793	1.21886	blue	turquoise	turquoise
DYNC1I2	-4.95688	12.9152	0.000267346	-0.740268	-0.290657	3.32445	3.83991	blue	turquoise	brown
LRCH4	-1.11597	10.0934	0.290297	-0.725922	0.241018	0.712723	0.955175	black	green	turquoise
FAM76B	1.71206	8.2444	0.124124	-0.12496	0.86003	1.3761	1.00857	greenyellow	pink	yellow
SIRT6	-1.81039	12.1677	0.0949844	-0.732242	0.0670726	1.05999	1.39258	turquoise	red	brown
POLD3	-4.60402	11.5481	0.000669919	-0.974074	-0.346433	1.52753	2.18778	blue	yellow	turquoise
CAPZB	-0.401988	12.475	0.694495	-0.557155	0.38297	3.94887	4.03597	tan	salmon	blue
GPR137B	4.25234	12.3479	0.00105462	0.321627	0.993241	1.02287	0.365432	magenta	brown	darkred
JADE1	-1.85528	12.4295	0.0874183	-0.986284	0.0772234	2.81205	3.26658	green	yellow	grey60
SLC25A43	-4.87202	13.062	0.00030081	-1.01205	-0.390449	1.27493	1.97618	cyan	yellow	blue
UBE2A	-2.77289	13.5274	0.015351	-0.833302	-0.105087	2.17553	2.64473	pink	yellow	brown
FGFR1	2.27502	11.0031	0.0439124	0.0115999	0.700585	5.36381	5.00772	lightgreen	brown	cyan
FBLN1	6.03113	8.64061	0.000229757	1.77895	3.9363	0.43724	-2.42039	yellow	blue	blue
MAP2	0.153501	10.7646	0.880843	-0.774457	0.890247	1.34802	1.29013	grey	yellow	blue
PIAS2	7.11766	9.19781	4.97473e-05	0.372309	0.717563	2.50057	1.95563	brown	blue	red
AMPH	-1.87768	9.50086	0.0914191	-4.62703	0.411343	-0.819292	1.28855	pink	turquoise	saddlebrown
ARAF	1.80032	12.3962	0.0961765	-0.0532336	0.570166	3.35057	3.0921	yellow	greenyellow	grey60
MCCC1	-0.593002	9.1998	0.567469	-0.492858	0.287593	1.68178	1.78442	blue	turquoise	sienna3
LAMP3	-1.15277	8.37335	0.280848	-3.71351	1.22538	-2.52225	-1.27818	black	turquoise	turquoise
FAP	4.55296	13.7648	0.000470419	2.20969	6.15769	-0.561651	-4.74534	yellow	brown	skyblue3
ACER3	-2.34347	13.903	0.0345035	-1.10875	-0.048718	2.3453	2.92403	turquoise	tan	brown
UBE2K	-0.760259	13.8333	0.459862	-0.903854	0.431167	2.6917	2.92804	pink	tan	magenta
PIK3C3	10.537	13.4224	7.25318e-08	0.748583	1.13316	3.49699	2.55611	yellow	grey60	black
N4BP2	3.60574	13.9638	0.00287652	0.278137	1.09528	2.05173	1.36502	darkgreen	blue	darkmagenta
TIGAR	-12.589	10.7062	9.37425e-08	-2.59458	-1.82014	-0.0319523	2.17541	turquoise	turquoise	darkturquoise
TULP3	0.521468	13.9737	0.610206	-0.200368	0.329069	2.71738	2.65303	skyblue	darkgrey	lightcyan
SYNJ2	-7.60421	8.19983	5.50363e-05	-1.56978	-0.841609	3.7976	5.00329	turquoise	turquoise	greenyellow
PPP2R5C	3.1726	9.28805	0.0108838	0.110483	0.650609	3.94649	3.56595	brown	magenta	black
PMS2P1	0.204078	12.019	0.841707	-0.412682	0.497996	-0.376906	-0.419563	grey	grey	blue
GNB1	-3.41078	13.7799	0.00430768	-0.756611	-0.171877	5.60591	6.07016	turquoise	salmon	thistle1
HOXA9	-4.65838	11.8646	0.000569215	-1.47116	-0.532719	1.20542	2.20736	pink	turquoise	turquoise
EDN1	4.65381	13.6907	0.000394544	0.565878	1.53716	7.07317	6.02165	red	blue	red
MLLT10	1.53367	13.6866	0.147898	-0.0798012	0.477337	2.88852	2.68976	greenyellow	darkred	turquoise
ITM2A	4.75338	13.9714	0.000310189	1.2253	3.24088	1.43671	-0.796382	yellow	blue	violet
NRDC	-3.05312	12.1442	0.00990383	-0.561704	-0.0942257	3.87439	4.20236	turquoise	turquoise	darkmagenta
VDAC3	-10.096	9.44518	2.28049e-06	-1.95038	-1.24052	2.81442	4.40988	blue	turquoise	darkturquoise
PCM1	4.83736	13.9861	0.000264162	0.240946	0.624866	5.16716	4.73425	purple	blue	pink
TNRC6C	6.87948	10.479	3.40046e-05	0.990794	1.93141	3.43256	1.97145	brown	greenyellow	midnightblue
CBFA2T2	6.82117	10.3053	3.97998e-05	0.915254	1.79799	2.33058	0.973954	tan	brown	darkred
ITCH	-0.0274731	7.46116	0.978803	-0.316553	0.309191	4.23577	4.23945	red	pink	red
TP53INP2	2.24615	13.9944	0.0413602	0.0224833	0.974772	2.16959	1.67096	magenta	brown	blue
SDF4	0.927526	10.7261	0.374054	-0.245758	0.601833	5.07915	4.90111	salmon	black	saddlebrown
TOLLIP	-0.146377	8.32224	0.887108	-0.472958	0.41614	2.54691	2.57532	magenta	midnightblue	yellow
UBE2D4	1.65555	13.886	0.120228	-0.0861973	0.667606	0.9213	0.630595	tan	grey	brown
RUNX1T1	5.45404	13.8093	8.91729e-05	1.10876	2.54906	4.53039	2.70147	brown	blue	ivory
THOC1	-4.79808	12.8809	0.000357042	-0.865743	-0.327825	1.77389	2.37068	blue	turquoise	darkolivegreen
FKBP7	3.47907	12.0443	0.00453061	0.248342	1.07972	1.67239	1.00836	salmon	grey60	paleturquoise
OSBPL6	0.323776	13.4852	0.751075	-1.10435	1.4954	-1.55464	-1.75017	black	green	brown
XRCC5	-9.14787	7.99078	1.65605e-05	-1.25189	-0.747727	5.5541	6.55391	green	yellow	brown
LXN	-1.96625	12.2633	0.0723195	-1.08844	0.0545244	2.44975	2.96671	blue	turquoise	salmon
MKNK1	1.86033	10.8	0.0902647	-0.052492	0.617546	1.95229	1.66976	grey	grey	blue
TNS1	13.703	13.4869	2.66845e-09	2.33339	3.20305	7.25423	4.48601	brown	blue	pink
REXO1	0.500513	9.473	0.628136	-0.410711	0.646378	2.60657	2.48873	magenta	midnightblue	turquoise
SAR1A	-0.115948	11.4479	0.909703	-0.295889	0.26614	4.53258	4.54746	red	pink	darkgrey
CDC14A	-2.49813	10.2982	0.0309253	-1.13847	-0.0672588	0.498737	1.1016	blue	turquoise	salmon
RAPGEF3	1.73832	8.49063	0.118173	-0.145837	1.07667	3.41416	2.94874	red	purple	turquoise
SENP1	-0.231759	13.8719	0.820109	-0.351099	0.282675	2.43503	2.46924	green	tan	turquoise
CIC	4.58547	9.05779	0.00129576	0.396217	1.16631	4.54389	3.76263	salmon	purple	yellow
LIPE	-1.56912	9.90195	0.147992	-0.926484	0.161394	-0.585192	-0.202647	turquoise	red	coral2
FDFT1	-7.12325	13.7497	5.69312e-06	-1.54516	-0.829064	2.8967	4.08381	blue	turquoise	green
PAFAH1B3	-3.71952	13.9571	0.00229825	-1.10772	-0.297306	0.909025	1.61154	black	green	sienna3
OPHN1	12.7445	13.4021	7.14575e-09	1.99879	2.81176	3.32723	0.921951	yellow	blue	tan
KIF22	-15.9588	8.70697	9.53115e-08	-2.69722	-2.02447	1.27069	3.63154	blue	turquoise	brown
CARMIL1	8.9305	13.5593	4.76348e-07	1.9558	3.19713	4.53988	1.96342	yellow	blue	yellow
PGM1	1.62597	13.9575	0.126315	-0.121704	0.883636	2.14146	1.76049	magenta	black	orange
DDX1	-4.17673	13.22	0.0010485	-1.18824	-0.378982	3.4523	4.23591	pink	tan	turquoise
DNM2	-2.31014	11.0307	0.0412275	-0.515815	-0.0125685	4.50528	4.76947	blue	turquoise	brown
EPB41L2	-2.59009	13.9989	0.0213868	-0.875778	-0.0823613	2.98401	3.46308	blue	turquoise	brown
STX7	6.78528	12.9428	1.32066e-05	0.662442	1.28173	3.84789	2.87581	greenyellow	blue	yellow
RABL2B	-1.88407	12.7336	0.082588	-0.869412	0.0603151	-0.0794903	0.325058	turquoise	green	red
KEAP1	-2.46391	12.2106	0.0295165	-0.589989	-0.0367914	3.30925	3.62264	turquoise	turquoise	green
SLC35C2	4.73084	12.5578	0.000431253	0.23474	0.631932	3.0106	2.57727	purple	brown	darkred
CRYBG3	6.32305	13.1139	2.54226e-05	0.447701	0.911779	3.72594	3.0462	brown	magenta	green
RFX3	5.77505	12.8081	6.82345e-05	0.638174	1.40286	1.41487	0.394346	tan	brown	darkorange
RIF1	-2.23056	13.9192	0.0426877	-0.751617	-0.0145306	3.96321	4.34629	midnightblue	yellow	turquoise
RAB21	3.30453	12.8964	0.00575341	0.233244	1.11613	3.4699	2.79522	darkgreen	magenta	turquoise
SMARCA2	9.33561	12.107	6.98554e-07	0.729254	1.17271	4.76918	3.8182	yellow	blue	green
SESN1	-2.3186	9.36621	0.0445245	-1.23618	-0.0189073	0.532668	1.16021	black	green	cyan
MID2	-0.429663	12.4033	0.67481	-0.396992	0.265815	2.07338	2.13897	black	yellow	yellow
SRCAP	0.512459	11.1835	0.618299	-0.540985	0.870216	0.704399	0.539784	tan	midnightblue	turquoise
PUM3	-8.57161	11.7256	2.16639e-06	-1.91467	-1.13696	2.26999	3.79581	green	turquoise	magenta
CNOT4	1.13168	10.1181	0.283878	-0.256404	0.787389	2.20355	1.93805	greenyellow	darkred	turquoise
PSEN1	8.44962	9.62945	9.28365e-06	0.636427	1.09553	3.90339	3.03741	yellow	blue	lightgreen
CPOX	1.25235	12.0037	0.234292	-0.213499	0.790746	2.46181	2.17318	magenta	grey	green
CLDND1	1.76231	11.0625	0.105587	-0.10065	0.912159	3.6872	3.28145	darkgreen	pink	red
MOK	1.7987	11.2888	0.09883	-0.101952	1.02946	0.0501993	-0.413553	brown	brown	brown
HSP90AA1	-9.55351	8.27356	9.46323e-06	-1.69814	-1.04081	5.54602	6.91549	blue	turquoise	darkturquoise
RBL1	-6.80411	10.9111	3.05969e-05	-2.64455	-1.35084	0.441752	2.43944	blue	yellow	brown
DLGAP4	1.66901	13.9534	0.117388	-0.152476	1.22074	3.29843	2.7643	tan	greenyellow	cyan
IGSF9B	9.14357	13.1754	4.52994e-07	4.01212	6.49015	2.53748	-2.71366	brown	blue	greenyellow
CROCCP3	3.31973	9.29157	0.00856123	0.413346	2.15547	0.592744	-0.691664	red	purple	yellow
NDC80	-14.0184	9.80224	8.29363e-08	-5.4216	-3.93099	-2.04035	2.63595	blue	turquoise	brown
AP4E1	-1.00689	12.0012	0.333857	-0.490156	0.180311	1.31361	1.46853	pink	yellow	turquoise
RSBN1	4.96504	13.2498	0.00024427	0.422935	1.07229	2.25942	1.5118	tan	blue	yellow
MAGI3	-0.396478	13.2733	0.698053	-0.285906	0.197081	2.00035	2.04476	blue	yellow	blue
TCF7	2.46585	8.15441	0.0384207	0.0729061	2.07459	0.716068	-0.357681	lightgreen	brown	blue
OSTM1	7.21971	12.2531	9.41419e-06	1.00186	1.86509	2.89282	1.45935	greenyellow	blue	yellow
PCNP	0.493947	13.2002	0.629461	-0.345257	0.550342	3.09151	2.98897	greenyellow	pink	darkmagenta
EXD2	-2.74819	13.4531	0.016171	-0.560277	-0.0680396	2.26347	2.57763	turquoise	turquoise	blue
ARG2	-6.8567	11.8826	1.84668e-05	-3.71256	-1.92059	-1.40484	1.41173	turquoise	turquoise	turquoise
MEF2C	2.96297	12.9468	0.0110361	0.186656	1.19305	3.44507	2.75521	greenyellow	blue	coral2
UBA5	0.033133	13.8917	0.97404	-0.485436	0.500658	2.08014	2.07253	grey60	tan	white
STK17B	0.983362	7.36819	0.356611	-0.656308	1.60714	2.15774	1.68232	brown	lightgreen	blue
ZNF510	1.65503	9.69005	0.129895	-0.105906	0.707393	1.52733	1.22658	tan	magenta	darkorange
ZNF506	6.11875	8.72085	0.000199522	1.37855	3.0084	2.16103	-0.032447	brown	blue	violet
JMJD4	-4.19939	7.80374	0.00316962	-1.70858	-0.493848	-0.087172	1.01404	black	green	red
DUSP12	-6.24931	9.82624	0.000102659	-1.2628	-0.597816	0.773994	1.7043	turquoise	turquoise	royalblue
AACS	-4.55177	12.1001	0.000650388	-1.38416	-0.48856	1.39707	2.33343	turquoise	green	midnightblue
KIAA0141	7.78615	12.2414	4.37998e-06	0.663635	1.1778	4.52379	3.60307	purple	brown	black
CADPS2	3.83436	11.3272	0.002632	0.286581	1.05258	3.85979	3.19021	brown	blue	black
HSPB11	-3.27893	11.5701	0.00689692	-1.18912	-0.237336	-0.0911662	0.622064	cyan	yellow	brown
PHLPP1	2.79256	13.7671	0.0145761	0.132562	1.01644	1.73421	1.15971	tan	blue	yellow
ATP8B1	-0.651039	13.5723	0.525891	-0.902731	0.483263	3.41715	3.62688	black	green	blue
SMARCD3	6.18426	13.7284	2.59274e-05	0.968114	1.9991	1.92707	0.443465	brown	brown	skyblue
WDR70	-0.521304	13.9657	0.610323	-0.30605	0.186387	2.27394	2.33377	green	green	blue
MPP4	-7.22168	13.1676	6.25944e-06	-6.3707	-3.43971	-4.54478	0.360423	turquoise	turquoise	lightcyan
STRADB	-0.0855769	7.2503	0.934118	-2.2237	2.06732	0.326537	0.404728	darkred	lightgreen	salmon4
BZW1	-6.30219	11.8207	4.21187e-05	-1.49084	-0.723871	4.13626	5.24361	green	yellow	brown
ME2	-8.24392	12.6896	1.89466e-06	-1.68497	-0.983846	2.19676	3.53117	turquoise	yellow	brown4
C5orf22	-1.71151	9.4064	0.119689	-1.35522	0.18343	1.2983	1.8842	grey60	tan	blue
CCNT2	-0.493782	8.85064	0.633482	-0.59608	0.382931	2.56799	2.67457	pink	lightcyan	turquoise
FAM135A	2.35999	7.68836	0.0471954	0.0123941	1.54291	1.81152	1.03387	greenyellow	pink	yellow
EPB41L3	4.96541	12.7074	0.000276363	0.381841	0.972457	6.12189	5.44475	brown	blue	plum1
COBLL1	0.714245	12.1962	0.488521	-0.577653	1.14257	3.70755	3.42509	brown	blue	green
DLG3	4.9164	13.9788	0.000228233	0.645159	1.64391	0.528666	-0.61587	brown	brown	brown
SERTAD4	5.20085	10.7671	0.000315286	1.31939	3.26434	2.31183	0.0199715	greenyellow	blue	darkgreen
TRAF5	3.61423	13.8208	0.00287155	0.245946	0.96606	1.67078	1.06478	royalblue	cyan	paleturquoise
MRPL22	-10.9774	7.08617	1.05462e-05	-2.85001	-1.84184	0.501562	2.84749	turquoise	turquoise	purple
GEMIN5	-8.65019	13.6283	6.65548e-07	-1.43425	-0.863154	2.52401	3.67272	green	turquoise	magenta
NFE2L1	3.11301	11.109	0.0097642	0.12784	0.742363	6.02868	5.59358	yellow	brown	darkseagreen4
GSK3B	-1.42733	8.93777	0.187473	-0.294417	0.0667662	3.69884	3.81266	pink	turquoise	green
ITGB5	-0.662268	11.89	0.52043	-0.79388	0.424057	3.76377	3.94868	green	red	blue
ERC1	5.7551	12.8681	6.92342e-05	0.610702	1.34597	4.34142	3.36308	tan	blue	blue
XPO1	-2.99969	13.7774	0.00969997	-1.06165	-0.175642	4.62302	5.24167	midnightblue	yellow	darkturquoise
RNF13	6.40198	10.1965	7.15589e-05	1.02791	2.121	3.23088	1.65642	darkgreen	blue	black
PALB2	-4.23809	9.48956	0.00193572	-1.58531	-0.487532	0.753232	1.78965	cyan	yellow	yellow
DOPEY1	7.30957	13.7047	4.36179e-06	0.780767	1.43109	3.03146	1.92553	brown	blue	yellow
LYRM2	-2.64861	13.9901	0.0190899	-0.710298	-0.0746342	1.65952	2.05199	cyan	yellow	darkolivegreen
BCKDHB	1.07769	11.9658	0.302419	-0.146798	0.433966	0.585473	0.44189	black	green	lightcyan
KAT6A	13.5784	12.8088	5.59729e-09	0.871417	1.20177	4.93253	3.89594	brown	blue	darkorange
ZCCHC6	6.04985	13.8522	3.12669e-05	0.486278	1.02127	3.4945	2.74072	purple	brown	purple
ULK2	5.02603	13.9898	0.000185766	0.353435	0.879689	2.36245	1.74589	lightgreen	brown	blue
TNPO1	-10.4888	8.79331	2.88275e-06	-1.89229	-1.21888	4.4667	6.02229	blue	turquoise	royalblue
PLOD1	-9.97129	13.7758	1.11768e-07	-1.39236	-0.898789	4.63217	5.77775	turquoise	turquoise	salmon
ITGAE	-1.99792	11.2311	0.0705248	-0.771639	0.0363514	0.410393	0.778037	turquoise	turquoise	yellow4
DIS3	-2.70815	9.77737	0.0224222	-1.07429	-0.10282	3.12415	3.71271	cyan	yellow	royalblue
PIBF1	4.3124	11.1119	0.00120208	0.399555	1.23048	2.23293	1.41791	greenyellow	magenta	darkgreen
TDRD3	6.41953	7.76516	0.000232772	0.810228	1.72616	2.44634	1.17815	brown	magenta	pink
NUFIP1	-5.57628	13.1535	8.59636e-05	-1.30019	-0.574685	-0.32789	0.609547	turquoise	turquoise	turquoise
PDS5B	1.20325	13.9917	0.248846	-0.171309	0.609104	2.8941	2.6752	greenyellow	darkred	green
OXCT1	-7.49854	9.90908	2.17475e-05	-1.5517	-0.840108	2.06699	3.2629	blue	yellow	brown
RRAGB	8.58018	13.8583	6.47229e-07	1.22569	2.04373	1.5367	-0.098006	yellow	grey60	tan
CYLD	7.44571	13.0812	4.68767e-06	0.740979	1.34619	3.29824	2.25466	yellow	blue	yellow
SLC27A5	-1.63091	8.84059	0.137954	-0.807349	0.131989	-0.352098	-0.0144182	green	turquoise	turquoise
ZNF324	0.895354	10.0437	0.391551	-0.229115	0.537254	1.36518	1.21111	grey	grey	yellow
ZNF671	3.18999	13.905	0.00659795	0.232413	1.18812	0.976491	0.266223	purple	blue	blue
ZNF416	-4.64351	12.7482	0.0004839	-1.11124	-0.404591	-0.644686	0.113231	turquoise	turquoise	blue
ZNF586	1.88448	13.9457	0.0805149	-0.0475879	0.73454	1.27172	0.928244	red	blue	brown
ZNF446	3.28132	9.35797	0.00902605	0.243671	1.30544	0.253126	-0.521429	magenta	purple	lightyellow
ZNF264	4.89174	12.8131	0.000306955	0.447735	1.15789	3.25536	2.45255	purple	blue	darkseagreen4
RPS5	-1.76493	8.985	0.11145	-0.928859	0.114804	5.82414	6.23117	green	yellow	blue
FAT1	6.66364	12.9871	1.56276e-05	2.164	4.2406	4.05486	0.852558	brown	brown	brown
YTHDC1	5.12443	9.60815	0.00050805	0.198986	0.50817	3.61703	3.26345	brown	blue	turquoise
CHMP2B	2.73667	12.2811	0.0177192	0.139971	1.2199	2.20051	1.52058	greenyellow	magenta	lightyellow
SMAP2	1.3268	8.20994	0.220288	-0.364783	1.36377	2.55952	2.06002	brown	lightgreen	bisque4
PPIE	-2.5223	9.88369	0.0305174	-0.530642	-0.0324368	2.0417	2.32324	lightcyan	turquoise	turquoise
ZMPSTE24	-1.78876	13.8506	0.0955392	-0.877907	0.0799011	3.00493	3.40393	pink	yellow	turquoise
STARD7	-8.86625	10.8262	2.71721e-06	-1.26533	-0.761259	4.26137	5.27467	blue	turquoise	green
NOA1	-1.36257	10.2993	0.202068	-0.485299	0.116086	2.00694	2.19155	black	green	black
REST	-1.07631	13.1805	0.301096	-0.321496	0.10748	3.83353	3.94054	green	yellow	yellow4
SSH1	9.90354	11.2411	6.82729e-07	1.12911	1.77223	5.08983	3.63916	yellow	blue	black
GSTP1	-6.32013	12.8266	2.82707e-05	-1.72476	-0.845109	4.834	6.11894	blue	turquoise	brown
APLP2	-1.04044	8.49982	0.326825	-0.67503	0.25233	6.6817	6.89305	turquoise	green	thistle1
FAM234B	4.66669	11.3558	0.000630445	0.367308	1.01834	2.01931	1.32648	yellow	blue	salmon4
WBP11	-4.00699	13.21	0.00144768	-1.11835	-0.335675	3.19597	3.92298	blue	yellow	brown
EIF3I	-6.27388	10.6447	7.00189e-05	-1.09881	-0.526346	4.52907	5.34165	green	turquoise	pink
COL16A1	17.1997	9.26321	2.41604e-08	4.91579	6.3973	3.34195	-2.3146	brown	blue	black
TXLNA	-3.29803	7.90926	0.011066	-0.566693	-0.0997669	4.71545	5.04868	green	turquoise	green
NCOA1	12.4975	8.29011	1.14873e-06	1.53501	2.22451	3.94905	2.06929	brown	blue	navajowhite2
AGBL5	-0.245242	13.007	0.810096	-0.434392	0.345819	2.27164	2.31593	black	green	lightyellow
EFR3B	4.75623	13.8388	0.000316584	0.713813	1.88866	0.171004	-1.13024	salmon	brown	greenyellow
KIF3C	-4.74738	10.9188	0.000614637	-1.05194	-0.385095	2.26534	2.98386	black	green	red
RAB10	-3.29374	11.2799	0.00693186	-0.684396	-0.137102	3.818	4.22875	cyan	tan	brown
GCKR	-5.84765	13.8736	4.39373e-05	-5.60599	-2.59535	-5.1422	-1.04153	blue	turquoise	pink
HADHA	-2.22132	13.9696	0.0433703	-0.633314	-0.0110364	4.98143	5.30361	green	royalblue	blue
MAPRE3	2.73019	13.9846	0.0162781	0.182414	1.5197	-0.182601	-1.03366	tan	blue	green
CAD	-5.12298	11.1634	0.000316779	-1.4627	-0.584661	3.66083	4.68451	green	turquoise	darkturquoise
CD59	0.818206	11.0689	0.430501	-0.322273	0.704119	7.58997	7.39905	red	blue	grey60
CD82	4.49586	13.4091	0.000558268	0.855217	2.428	1.72088	0.0792713	salmon	cyan	cyan
BCORL1	1.84776	12.5771	0.0882829	-0.0969988	1.21714	1.33051	0.770443	tan	greenyellow	lightyellow
ATRX	4.99011	11.5999	0.000348322	0.45317	1.1604	4.59434	3.78755	greenyellow	brown	yellow
AK6	-2.52087	11.043	0.0283578	-1.99844	-0.135858	-0.488823	0.578327	cyan	yellow	turquoise
MYNN	1.23381	11.6438	0.241598	-0.218521	0.784689	1.28008	0.996995	greenyellow	pink	turquoise
MECOM	4.11946	12.92	0.00122345	0.206184	0.66152	5.24743	4.81358	purple	brown	tan
SCAMP1	2.29593	9.4579	0.0459779	0.0122577	1.10555	3.15656	2.59766	greenyellow	pink	turquoise
PREP	-0.758863	13.8184	0.460683	-0.357667	0.170886	2.39293	2.48632	pink	salmon	blue
HACE1	4.12127	9.01806	0.00258194	0.247264	0.848597	1.60973	1.0618	greenyellow	grey60	yellow
SEH1L	-2.95592	13.6475	0.010663	-1.04706	-0.165269	2.01427	2.62043	midnightblue	yellow	turquoise
WDR47	-1.82649	10.952	0.0951322	-0.605716	0.0564828	2.21804	2.49265	cyan	yellow	red
WDFY1	-6.89024	13.2755	9.86011e-06	-0.830753	-0.43479	3.89063	4.5234	blue	yellow	magenta
SLC25A24	-5.09464	10.2314	0.000435346	-1.49451	-0.586961	2.41386	3.45459	cyan	yellow	darkgrey
MAP3K4	3.70915	10.1844	0.00392319	0.133099	0.53114	3.04082	2.7087	purple	brown	pink
ZNF213	-0.25627	11.6029	0.802229	-0.722471	0.570921	0.545765	0.62154	magenta	salmon	blue
AKR1B1	-9.97311	13.6433	1.21495e-07	-2.90922	-1.87732	0.953624	3.34689	turquoise	turquoise	green
CPNE3	0.419271	11.0311	0.683067	-0.363664	0.534891	3.7325	3.64688	darkgreen	pink	blue
RRN3	-1.81294	11.5119	0.0959782	-0.518208	0.0487084	2.37106	2.60581	pink	turquoise	turquoise
CTTN	-3.60875	11.8524	0.00365671	-0.88435	-0.217923	5.17996	5.7311	green	red	steelblue
MTIF2	-7.18704	8.8138	5.73971e-05	-1.09401	-0.568909	1.76533	2.59679	green	yellow	brown
DDHD2	-0.977868	12.1839	0.347157	-0.301012	0.114303	3.28336	3.37671	green	yellow	blue
TTC39A	5.33849	9.70667	0.000363833	1.30673	3.19217	0.162288	-2.08717	yellow	brown	cyan
EPS15	8.87973	12.8036	7.86053e-07	0.565703	0.930217	4.30022	3.55226	purple	blue	cyan
ORC1	-12.9263	8.8285	4.89573e-07	-5.36621	-3.7637	-2.46698	2.09798	blue	turquoise	brown
MGST2	0.665712	13.5916	0.516735	-0.420116	0.79675	2.42286	2.23454	grey	yellow	blue
CHERP	-1.17717	13.9203	0.258864	-1.34477	0.392036	1.49829	1.97466	tan	salmon	royalblue
ATG16L1	-1.00575	13.8628	0.331771	-0.27244	0.0986075	2.78331	2.87022	green	red	turquoise
USP40	-0.739345	11.1145	0.475023	-0.364901	0.18122	2.54732	2.63917	green	red	cyan
POMGNT1	2.31153	12.0004	0.039366	0.0115209	0.389762	3.92388	3.72323	red	brown	turquoise
RAD54L	-10.0775	9.45529	2.29811e-06	-4.45422	-2.83083	-2.83003	0.812488	blue	turquoise	brown
MAST2	-1.36922	11.4601	0.197166	-0.771713	0.178004	3.01966	3.31652	turquoise	red	turquoise
DNAJA1	-2.71484	9.57182	0.0225725	-0.834445	-0.0796504	4.87713	5.33418	cyan	yellow	grey60
B4GALT1	5.19069	13.2758	0.00016248	0.834449	2.01995	5.37627	3.94908	yellow	blue	lightgreen
CHMP5	1.8159	11.1771	0.0962805	-0.0748727	0.788877	3.30644	2.94943	brown	blue	turquoise
NFX1	1.53114	9.18061	0.159436	-0.0971766	0.508056	2.83793	2.63249	skyblue	darkred	skyblue
DIMT1	-3.80286	13.3421	0.00210153	-1.2719	-0.351859	1.8093	2.62118	midnightblue	yellow	darkturquoise
IPO11	-6.43213	8.37321	0.000165793	-1.61311	-0.766543	2.29508	3.48491	pink	yellow	orangered4
EIF2AK1	-1.01632	7.2481	0.342198	-1.21965	0.482837	3.80382	4.17223	darkred	lightgreen	salmon
SEPHS1	-5.34369	12.4784	0.00015347	-0.849822	-0.359021	2.58958	3.194	turquoise	turquoise	turquoise
MRPL28	-6.11094	11.8594	5.52098e-05	-1.80836	-0.856848	2.00277	3.33538	turquoise	turquoise	turquoise
ITPKC	4.98319	13.435	0.000226859	0.682285	1.72059	3.28693	2.0855	yellow	brown	red
RBM22	1.95973	10.592	0.0768594	-0.0206277	0.341909	3.39161	3.23097	brown	blue	pink
TMED2	-3.49982	9.21584	0.00648485	-1.24618	-0.269794	4.60836	5.36635	cyan	yellow	magenta
ERO1B	9.6583	11.2974	8.46258e-07	1.07668	1.70959	0.937638	-0.455498	greenyellow	blue	green
ZFAND6	1.34477	8.79365	0.212353	-0.217181	0.848319	2.7448	2.42923	grey60	magenta	lightcyan
TXLNG	-2.40358	10.1613	0.0367231	-0.776595	-0.0302499	1.46121	1.86463	midnightblue	yellow	darkslateblue
LAT2	2.87088	8.65393	0.0191914	0.297278	2.57215	0.180934	-1.25378	brown	blue	green
HUWE1	-0.370591	9.90927	0.718741	-0.318546	0.227791	6.17192	6.21729	red	midnightblue	turquoise
ZW10	-8.84893	10.0156	4.76552e-06	-1.52548	-0.91189	1.80935	3.02804	blue	yellow	brown
ALG9	-1.95297	13.8439	0.071341	-0.500977	0.023715	-0.235907	0.00272443	pink	tan	turquoise
NOX4	-3.08959	13.9998	0.00799618	-1.95051	-0.352065	0.977536	2.12882	turquoise	green	salmon
ACOX3	0.362221	13.2104	0.722915	-0.33727	0.473415	2.11679	2.04872	green	black	midnightblue
MTMR2	-2.7081	13.6879	0.0172588	-0.848157	-0.0975569	3.32664	3.7995	pink	tan	green
PPP1R15A	14.4456	9.10568	1.38335e-07	2.46865	3.38346	6.45444	3.52838	brown	blue	thistle2
HSD17B14	3.61451	13.7077	0.00290495	0.538003	2.116	0.16003	-1.16697	salmon	cyan	yellow
TRIP6	-9.47963	13.7744	2.06583e-07	-1.6847	-1.06224	2.16332	3.53679	turquoise	turquoise	turquoise
FTL	-0.601834	9.64996	0.561157	-0.736451	0.424431	6.22502	6.38104	darkred	green	black
SRRT	-5.12651	11.0369	0.000326619	-1.11242	-0.444328	3.59001	4.36838	lightcyan	turquoise	turquoise
BAX	-13.9205	13.9927	1.37056e-09	-2.64164	-1.93627	1.70556	3.99452	turquoise	turquoise	green
NLK	2.98435	10.4843	0.0130471	0.0888413	0.599742	3.11771	2.77342	greenyellow	blue	yellow
PIGS	-1.14063	12.6196	0.275209	-0.23814	0.073896	3.49755	3.57967	green	turquoise	mediumorchid
ATXN7L3	-3.16863	13.1183	0.00732852	-0.605886	-0.114903	3.65397	4.01436	turquoise	turquoise	red
PGS1	4.2572	13.7423	0.000829228	0.404105	1.22762	3.14177	2.32591	orange	cyan	yellow
PSMC5	-5.50593	13.3319	9.23337e-05	-1.03176	-0.451314	2.77014	3.51168	pink	turquoise	magenta
UIMC1	-1.696	10.5015	0.119285	-0.652469	0.0864099	2.83489	3.11792	lightcyan	turquoise	red
MMP2	9.88315	12.5225	2.83917e-07	2.14562	3.35204	8.20345	5.45462	yellow	brown	mediumpurple3
LPCAT2	4.53077	11.2959	0.000801409	0.641507	1.8461	4.52549	3.28169	greenyellow	blue	red
OGFOD1	-9.64226	13.9767	1.48505e-07	-1.38304	-0.879657	2.43641	3.56776	midnightblue	turquoise	royalblue
SH3BP2	6.28634	8.09238	0.000225135	0.58134	1.25283	4.94861	4.03152	brown	brown	pink
NOP14	-8.89254	10.3971	3.51432e-06	-1.3815	-0.830189	2.49146	3.5973	turquoise	turquoise	magenta
ADD1	6.03768	10.4088	0.000106448	0.388793	0.839783	6.18561	5.57132	brown	blue	black
L2HGDH	-3.69776	10.529	0.00378101	-1.66982	-0.419432	-1.60241	-0.557786	pink	turquoise	brown
TXNDC16	5.20845	8.88092	0.000582211	1.04801	2.66317	1.08255	-0.773047	greenyellow	magenta	tan
NID2	0.0768369	9.87919	0.940287	-1.47844	1.58386	0.713073	0.66036	black	green	blue
GMCL1	1.27766	12.6961	0.224238	-0.160609	0.622789	1.33898	1.10789	greenyellow	pink	yellow
SF3B2	-4.3972	9.28397	0.00160286	-0.812163	-0.26208	4.70049	5.23762	green	red	purple
KLHL42	0.3649	14	0.720639	-0.232953	0.32847	2.33364	2.28588	pink	yellow	turquoise
GNAS	1.65687	11.1275	0.125442	-0.0683687	0.487112	6.44752	6.23815	tan	greenyellow	paleturquoise
DNM1L	-6.44456	12.5716	2.55977e-05	-1.33569	-0.663264	3.14208	4.14155	midnightblue	yellow	magenta
PTHLH	3.24411	13.5166	0.0061199	0.85384	4.21883	1.0507	-1.48563	yellow	blue	greenyellow
ERGIC2	-0.255625	10.1682	0.803337	-0.627815	0.498328	2.47627	2.54101	darkgrey	pink	darkolivegreen
AURKA	-11.4384	7.54613	4.91567e-06	-6.3622	-4.20859	-1.73111	3.55429	blue	turquoise	brown
PIR	-1.1617	10.7341	0.270538	-1.32043	0.409905	2.96493	3.42019	blue	yellow	black
AAMDC	1.54321	13.4816	0.145921	-0.129876	0.787725	0.979422	0.650497	magenta	grey	brown
RFX2	7.51129	13.9849	2.84856e-06	1.53903	2.76939	2.76623	0.61202	brown	brown	darkgrey
METTL2A	-3.99453	13.5928	0.00140522	-0.892247	-0.267687	0.778376	1.35834	midnightblue	yellow	turquoise
ALG6	-0.336959	13.1906	0.741449	-0.727456	0.530898	0.685883	0.784162	grey60	yellow	brown
CNOT3	-2.14676	11.5448	0.0538179	-1.40988	0.0135355	1.77074	2.46892	pink	salmon	saddlebrown
PTPN4	2.85085	12.5362	0.0140598	0.136007	1.00049	2.02859	1.46035	salmon	black	salmon4
DDX18	-2.65811	12.8441	0.0198729	-0.878624	-0.0902232	3.4398	3.92423	midnightblue	yellow	saddlebrown
KHSRP	-7.86509	13.7308	1.89271e-06	-1.37131	-0.782805	3.79034	4.86739	pink	turquoise	brown
GNA11	-4.65443	8.31654	0.0014747	-0.772773	-0.262991	3.96565	4.48353	pink	turquoise	steelblue
ASAP3	10.4737	11.284	3.72676e-07	2.04511	3.12912	4.50686	1.91974	brown	brown	black
EDEM2	0.0947873	13.5688	0.925869	-0.356882	0.389782	3.2007	3.18425	grey	green	black
DNMT3B	-7.28255	7.43692	0.000122885	-2.16418	-1.11272	-1.00609	0.632361	turquoise	turquoise	blue
FER1L4	2.25977	12.6732	0.0421369	0.040207	1.89872	-0.106222	-1.07568	darkorange	purple	mediumpurple3
PDRG1	-7.5025	12.6072	5.38439e-06	-1.8651	-1.02907	-0.312683	1.1344	turquoise	turquoise	turquoise
EPB41L1	7.08444	12.3499	1.09073e-05	1.64036	3.0909	3.69922	1.33359	yellow	blue	lightgreen
DOCK9	5.1732	13.3672	0.000163932	0.522348	1.26788	6.37388	5.47876	brown	brown	darkgreen
ANKRD10	7.47095	11.7815	8.3718e-06	0.819171	1.49565	3.52285	2.36544	purple	brown	midnightblue
TGDS	-1.76784	13.979	0.0988976	-1.00283	0.096684	0.218291	0.671366	midnightblue	tan	steelblue
C3orf18	0.821556	13.1735	0.425949	-0.471288	1.05095	0.0232907	-0.266538	grey	brown	darkgreen
COQ9	-4.6746	8.90125	0.00119597	-1.00994	-0.350483	1.95723	2.63744	blue	turquoise	blue
KIF9	4.49927	12.1011	0.000712714	0.374174	1.07558	1.1118	0.386919	brown	brown	brown
ARHGAP28	3.00912	12.0808	0.0108084	0.263373	1.6419	3.46727	2.51463	yellow	brown	thistle1
CRLS1	-4.80406	13.8258	0.000290274	-0.809103	-0.30923	1.97029	2.52945	cyan	yellow	darkgrey
PPP1R13B	3.6838	13.4744	0.00260404	0.290094	1.10579	3.02642	2.32848	yellow	brown	honeydew1
ATRN	13.5366	12.8292	5.69947e-09	0.696624	0.961632	4.4351	3.60597	yellow	brown	mediumpurple3
SMOX	-1.10693	10.3714	0.293337	-1.91523	0.639757	0.30915	0.946885	turquoise	green	brown
FKBP1A	2.38618	13.4257	0.0323783	0.0626523	1.22196	5.49037	4.84806	tan	greenyellow	blue
NSFL1C	-4.07417	13.4578	0.00122898	-0.583836	-0.180132	3.19443	3.57641	lightcyan	turquoise	magenta
SLC4A11	-6.20506	12.3821	3.96295e-05	-5.03038	-2.42238	-3.72333	0.00305577	turquoise	green	green
C20orf194	2.78787	9.53399	0.0200342	0.0896872	0.828081	2.92649	2.46761	royalblue	cyan	lightcyan
ZNF343	-0.554707	12.1378	0.589171	-0.422777	0.251018	1.25127	1.33715	lightcyan	red	turquoise
EBF4	9.79017	11.1727	8.06103e-07	2.75638	4.35129	1.65584	-1.898	yellow	brown	yellow
CPXM1	5.15818	8.99431	0.000597747	1.00619	2.57837	0.644383	-1.1479	salmon	brown	mediumpurple3
MAVS	-3.47423	13.368	0.00395905	-0.97702	-0.22911	4.28215	4.88521	turquoise	green	tan
LZTS3	-0.489605	9.31099	0.635742	-1.53562	0.986889	-1.04933	-0.774959	black	green	yellow
XRN2	-3.653	8.59957	0.00571605	-0.700311	-0.162309	4.18961	4.62092	green	yellow	brown4
KIZ	10.2029	13.3647	1.11109e-07	1.05752	1.62366	1.17737	-0.163219	brown	brown	blue
DYNLL1	-2.65958	13.9429	0.0187279	-0.917017	-0.098085	3.76791	4.27547	cyan	salmon	brown
SNX5	-7.97085	13.5329	1.78833e-06	-1.57489	-0.905347	2.96298	4.20311	midnightblue	yellow	grey60
RPL6	-2.27592	13.1722	0.040179	-0.630911	-0.016852	5.3982	5.72208	red	royalblue	blue
MAPKAPK5	-0.76103	10.1372	0.463974	-0.389053	0.19068	2.48077	2.57996	green	red	turquoise
P2RX7	4.53719	9.65602	0.00117989	0.701645	2.06873	0.635816	-0.749372	brown	blue	cyan
ESF1	-1.58772	11.6824	0.13903	-0.771997	0.122288	1.69455	2.0194	midnightblue	tan	turquoise
RBBP9	0.713563	8.94034	0.493702	-0.266932	0.512561	2.28999	2.16717	darkgrey	pink	yellow
ANAPC5	-4.89446	12.6251	0.000318824	-0.385018	-0.148719	4.69967	4.96654	red	turquoise	darkgrey
SLC23A2	5.70677	11.008	0.000136436	0.493297	1.11261	3.82522	3.02227	yellow	brown	salmon4
SLC8B1	3.24456	13.1055	0.00633524	0.209008	1.03991	3.40953	2.78507	brown	blue	white
TMEM230	-0.266705	7.35174	0.797024	-0.863648	0.687047	2.81416	2.90246	grey60	lightcyan	red
DZANK1	0.499071	13.8612	0.625556	-0.413591	0.664132	-1.26313	-1.3884	black	black	magenta
KDM2B	-5.35537	7.9739	0.000688894	-0.988682	-0.393276	1.80884	2.49982	turquoise	turquoise	bisque4
TASP1	5.64992	10.1566	0.000200537	0.671622	1.54328	1.27634	0.168891	purple	blue	turquoise
OAS1	5.82251	13.9904	4.43807e-05	1.96877	4.26531	1.95989	-1.15715	yellow	blue	greenyellow
GCN1	-5.3951	8.72849	0.000483771	-1.12648	-0.458667	4.78441	5.57698	green	red	darkgrey
RPLP0	-2.35666	10.7176	0.0385996	-1.20428	-0.0391997	6.58983	7.21157	green	darkturquoise	blue
PXN	-0.293107	10.5575	0.775121	-0.581261	0.445257	5.51812	5.58613	tan	midnightblue	brown
KIF16B	7.44311	13.6267	3.69021e-06	0.695708	1.261	2.04181	1.06346	yellow	blue	skyblue3
TRMT6	-4.34048	13.6652	0.000715984	-1.57133	-0.530398	0.607384	1.65825	midnightblue	yellow	turquoise
PEBP1	-5.03942	12.5787	0.000250659	-1.08742	-0.433279	3.99014	4.75049	green	turquoise	cyan
BRAP	1.47462	11.76	0.166577	-0.0406691	0.209808	2.42406	2.33949	black	green	turquoise
ERP29	-0.439028	10.8959	0.66922	-0.514183	0.343334	3.7119	3.79732	grey	grey	green
FUS	-1.18853	13.5755	0.255001	-1.65314	0.476477	3.66387	4.2522	pink	salmon	magenta
IGBP1	2.8059	13.9513	0.0140544	0.151648	1.13697	3.04812	2.40381	salmon	lightyellow	tan
FXYD5	0.570278	13.5704	0.57781	-0.497983	0.857258	4.76323	4.58359	brown	greenyellow	pink
ZNF302	4.25385	12.4544	0.00103222	0.305333	0.941263	1.34095	0.717657	magenta	grey60	greenyellow
GRAMD1A	6.32561	13.8235	1.98621e-05	0.736081	1.49268	4.64681	3.53243	salmon	brown	paleturquoise
HEPH	10.102	8.64315	4.46073e-06	2.46892	3.90537	3.53758	0.350428	white	blue	skyblue3
CDIP1	2.96357	9.21494	0.0154722	0.116483	0.856709	3.83721	3.35062	yellow	blue	yellow
CMTM1	-1.58849	13.7808	0.134848	-1.02184	0.153011	-1.65275	-1.21834	black	turquoise	turquoise
GANAB	0.532995	12.385	0.60347	-0.157067	0.259263	6.12961	6.07851	red	purple	lightcyan
GMIP	0.354594	12.4352	0.728835	-0.689325	0.958552	1.88792	1.75331	black	green	bisque4
RBM41	0.308477	10.7746	0.763602	-0.304134	0.402987	0.911176	0.86175	magenta	tan	green
BIRC5	-17.5779	7.36707	2.77245e-07	-6.51729	-4.98541	-1.75272	3.99863	blue	turquoise	brown
MLF2	-8.29287	9.46438	1.21464e-05	-0.906946	-0.520465	3.54145	4.25515	turquoise	turquoise	turquoise
OTUB2	-1.20679	13.6591	0.247998	-1.03155	0.289809	-1.50846	-1.13759	black	green	turquoise
DDX24	3.02797	9.33887	0.0137145	0.0983883	0.667206	5.41675	5.03395	purple	blue	grey60
ZBTB25	5.13516	13.3682	0.000175366	0.368221	0.900472	1.35845	0.724102	brown	brown	yellow
NECAP1	-1.47643	13.1542	0.163363	-0.367228	0.0688499	2.23084	2.38002	green	yellow	turquoise
ARHGAP4	7.75034	13.5604	2.42101e-06	1.23003	2.17526	3.64597	1.94333	brown	brown	lightgreen
DHX32	-3.99964	12.268	0.00168961	-0.904583	-0.267585	1.83503	2.42111	turquoise	turquoise	yellow
RCOR1	-5.47862	13.0755	0.000103757	-0.870566	-0.378367	2.28314	2.90761	pink	turquoise	royalblue
GPATCH2L	11.2	12.1443	9.26287e-08	0.505359	0.749072	3.83353	3.20631	purple	brown	midnightblue
LTBP4	14.0722	10.423	4.08917e-08	4.13323	5.67823	7.06171	2.15598	yellow	brown	sienna3
BLVRB	0.0128027	7.41817	0.990123	-1.29953	1.31385	1.97326	1.9661	darkred	lightgreen	blue
SLC9A1	-4.5854	13.7367	0.000444763	-1.16312	-0.420882	2.85254	3.64454	pink	turquoise	lightcyan1
SPTLC1	-0.343782	8.05439	0.739812	-0.570038	0.421974	3.433	3.50703	darkgrey	pink	turquoise
PAPOLA	-1.54115	13.8514	0.145811	-0.852807	0.14008	4.41174	4.76811	grey60	tan	darkturquoise
CCNK	2.78857	11.5394	0.0169297	0.116225	0.963974	0.409299	-0.130801	magenta	blue	brown
PCBP4	-3.8244	11.263	0.00270555	-1.16181	-0.314558	2.11901	2.85719	green	red	plum2
YPEL3	6.94933	11.1491	2.26173e-05	1.67732	3.22857	3.02182	0.568873	yellow	brown	darkred
MRPS33	-1.11029	8.20996	0.298333	-1.12726	0.392348	0.750621	1.11808	darkgrey	yellow	brown
NDUFB2	-4.16508	12.8218	0.00114167	-1.27918	-0.404593	2.30489	3.14677	blue	turquoise	ivory
NUDC	-9.48225	8.09261	1.16577e-05	-1.57648	-0.960688	2.72626	3.99484	turquoise	turquoise	magenta
MAEA	-1.99237	12.2333	0.0691284	-0.606386	0.026465	3.10408	3.39404	turquoise	red	turquoise
ICAM1	13.6035	13.9863	1.86338e-09	4.58084	6.29586	5.90641	0.468062	yellow	blue	yellow
STRN4	-4.00725	10.9552	0.00207709	-0.704723	-0.204876	3.96786	4.42266	turquoise	red	green
IRAK3	7.04674	13.2494	7.85416e-06	1.47752	2.7804	4.6731	2.54414	brown	blue	black
MUL1	-0.643374	13.9686	0.530403	-0.38772	0.208814	2.39104	2.4805	black	red	floralwhite
TFAP4	-6.11616	10.1307	0.000107226	-1.17576	-0.548651	0.0376484	0.899856	turquoise	turquoise	pink
PDCD7	-0.89991	13.5779	0.383851	-0.260491	0.106823	1.97853	2.05536	black	turquoise	black
SPG21	-0.922833	13.0381	0.372857	-0.268307	0.10766	2.89465	2.97497	black	turquoise	black
DNAJB11	-3.80683	11.2383	0.00280102	-1.02812	-0.276041	2.32988	2.98196	pink	yellow	lightsteelblue1
RAB11FIP3	1.03381	10.7865	0.323846	-0.195382	0.539927	3.45245	3.28018	magenta	black	midnightblue
GNPTG	7.08199	13.6392	6.34568e-06	0.761459	1.4254	3.12158	2.02815	yellow	brown	yellow
ZNF268	3.78826	8.23935	0.00504431	0.219038	0.891871	2.21259	1.65714	brown	blue	blue
GOLGA3	1.32425	11.1482	0.211928	-0.13483	0.543795	5.3556	5.15112	red	black	red
PABPC4	-3.95391	10.4705	0.00248189	-0.640826	-0.180686	4.53819	4.94895	blue	turquoise	brown
CERS4	3.797	13.9268	0.00197941	0.587026	2.11283	0.506974	-0.842951	yellow	blue	blue
MCOLN1	0.265572	12.027	0.795066	-0.716253	0.915151	0.73696	0.637511	tan	salmon	turquoise
USP48	-2.65124	13.786	0.01918	-0.71873	-0.0753784	3.75211	4.14917	turquoise	turquoise	darkgrey
EFNB1	-9.18812	11.2313	1.46511e-06	-3.87748	-2.38184	-0.07068	3.05898	turquoise	turquoise	cyan
PDPR	3.48852	11.5211	0.00474344	0.241108	1.05329	3.37062	2.72342	greenyellow	blue	sienna3
AARS	-3.11246	7.83788	0.0147619	-0.873111	-0.12841	4.15177	4.65253	green	turquoise	green
GLG1	6.80048	13.1127	1.20659e-05	0.421939	0.814334	6.04228	5.42414	lightgreen	brown	black
KIF4A	-10.4569	7.40263	1.0717e-05	-5.92773	-3.76079	-1.72829	3.11598	blue	turquoise	brown
TNRC6A	-0.669608	9.80917	0.518558	-0.433353	0.233482	3.90479	4.00472	green	salmon	salmon
PLEKHG2	3.08546	8.69154	0.0135719	0.262083	1.73209	4.38913	3.39204	darkorange	purple	lightpink4
NAT14	-1.86495	11.0942	0.0888393	-1.38374	0.113649	0.428315	1.06336	black	green	red
PITPNM2	-2.10965	12.9377	0.054942	-1.12873	0.0136821	1.21267	1.77019	turquoise	turquoise	cyan
EXOC1	2.1512	9.18353	0.0593243	-0.011787	0.499021	3.06944	2.82583	red	magenta	blue
RBM27	-0.0611685	11.1505	0.952308	-0.659231	0.623523	1.41147	1.42933	grey60	pink	turquoise
OSBPL8	1.13811	9.64844	0.282547	-0.212921	0.653081	3.42172	3.20164	greenyellow	pink	pink
DTX2	2.55299	11.7165	0.0257297	0.0696031	0.895316	-0.0444427	-0.526902	magenta	purple	turquoise
PUS7	-13.5185	12.7927	5.99188e-09	-1.36862	-0.990925	2.07119	3.25096	blue	turquoise	darkorange2
NRCAM	-14.5053	11.158	1.37054e-08	-7.75024	-5.71117	-1.94164	4.78906	turquoise	turquoise	brown
LAMB1	4.94752	11.9251	0.00034411	0.367176	0.945788	7.68334	7.02686	lightgreen	brown	blue
DLD	-4.49527	12.3139	0.000687699	-0.867885	-0.302305	2.72205	3.30715	pink	yellow	darkorange2
WDR7	5.35698	13.4071	0.000117333	0.339071	0.79502	2.59085	2.02381	yellow	blue	green
TXNL1	-2.23212	9.38411	0.0513445	-1.0633	0.00379702	2.51312	3.04287	grey60	yellow	cyan
CMTM6	-3.98066	7.49208	0.00463406	-1.27639	-0.332969	3.23585	4.04053	cyan	yellow	steelblue
ITGA6	-10.518	12.4796	1.45266e-07	-3.88723	-2.5578	1.65473	4.87724	turquoise	turquoise	cyan
RAPGEF4	15.0058	13.083	1.26293e-09	2.84701	3.80391	3.85021	0.524755	yellow	blue	lightgreen
MAP3K20	-0.786455	13.9996	0.44471	-0.452513	0.209694	3.23988	3.36129	green	yellow	brown
FH	-10.294	12.4007	1.95887e-07	-2.63607	-1.71783	1.99774	4.17469	blue	turquoise	magenta
SEL1L3	-2.21831	12.3418	0.0459949	-0.889133	-0.0093502	3.74424	4.19348	black	turquoise	salmon4
CDV3	-2.27195	12.5163	0.0414468	-0.785276	-0.0182247	5.39812	5.79987	midnightblue	yellow	darkmagenta
ALKBH5	-3.40411	12.4225	0.00499431	-0.53322	-0.117982	3.76637	4.09197	turquoise	turquoise	darkgrey
NLRP1	4.52916	12.1199	0.000673815	0.510431	1.45479	5.09633	4.11372	purple	brown	black
PITPNM3	4.75316	12.6345	0.000407799	1.25848	3.36702	1.5657	-0.747045	purple	blue	skyblue
SPAG7	0.8592	13.9837	0.404719	-0.146221	0.341633	2.65675	2.55904	black	black	turquoise
ORC6	-11.0909	8.10909	3.50342e-06	-7.45203	-4.89156	-4.33305	1.83875	turquoise	turquoise	purple
ZC3HC1	-9.51005	9.43987	3.84584e-06	-1.29832	-0.802194	1.28812	2.33837	lightcyan	turquoise	magenta
RGS17	-2.40604	12.6803	0.0321546	-3.73098	-0.19595	-4.53591	-2.57245	black	green	darkorange2
ANGPT2	-8.53958	11.8749	2.0611e-06	-4.0067	-2.37623	1.26992	4.46139	turquoise	turquoise	red
TMEM101	1.18481	12.5767	0.258	-0.23453	0.799902	2.52395	2.24127	red	red	lightcyan
CD200	8.71452	13.1547	7.93649e-07	1.72312	2.85727	2.49634	0.206147	yellow	blue	mediumpurple3
CCDC80	13.2183	8.35318	6.85973e-07	2.70106	3.83256	5.40793	2.14112	brown	blue	mediumorchid
PSME1	2.95624	12.7372	0.0113495	0.162152	1.04937	3.52233	2.91657	brown	blue	black
PPP2R3C	-0.447513	8.60876	0.665552	-0.772424	0.518762	1.43993	1.56676	grey60	lightcyan	lightyellow
HAUS4	0.154411	11.0943	0.880059	-0.374812	0.431433	1.26332	1.23501	green	darkturquoise	lavenderblush3
JPH4	13.0916	8.80426	4.51566e-07	5.41055	7.68026	1.39691	-5.14849	yellow	blue	greenyellow
SLC7A8	6.28175	8.08339	0.000227321	1.28627	2.77418	1.41107	-0.619158	brown	blue	lightgreen
OSGEP	-1.31741	13.3639	0.209843	-0.374894	0.090381	2.22503	2.36728	red	turquoise	brown
SLC22A17	20.0153	13.2632	2.68849e-11	3.13525	3.89224	3.49564	-0.0181052	yellow	blue	saddlebrown
RNF31	-1.53407	12.5393	0.149849	-0.596146	0.102143	1.85696	2.10396	green	turquoise	tan
SCFD1	-1.38747	10.6161	0.193731	-0.77152	0.176522	2.23173	2.52923	cyan	yellow	magenta
G2E3	-4.15621	13.6672	0.00101827	-1.60309	-0.510096	0.953528	2.01012	cyan	yellow	brown
HECTD1	1.691	13.3377	0.114059	-0.0383975	0.318373	5.55343	5.41344	red	lightyellow	green
HNRNPC	-6.40272	8.65068	0.00014859	-1.23783	-0.588554	5.1924	6.10559	green	yellow	darkturquoise
SUPT16H	-12.8199	12.4827	1.49061e-08	-1.19246	-0.847279	4.04413	5.064	green	turquoise	purple
TOX4	-0.415053	13.7591	0.684502	-0.249404	0.168639	3.57315	3.61353	red	darkgrey	salmon
GEMIN2	-4.77251	13.0816	0.000358176	-1.40372	-0.529268	-0.234586	0.731906	midnightblue	yellow	magenta
TINF2	0.426822	8.3794	0.680264	-0.207869	0.303212	3.40117	3.3535	red	darkturquoise	darkgreen
SEMA6A	8.29424	13.9017	9.42633e-07	1.91338	3.24926	2.16903	-0.412286	yellow	blue	pink
TRPM7	0.859127	12.9732	0.405866	-0.280191	0.650047	3.45048	3.26555	red	pink	green
TYRO3	-7.5844	9.98504	1.889e-05	-2.28896	-1.24929	0.331185	2.10031	turquoise	turquoise	black
WDR76	-10.652	12.0185	1.77747e-07	-2.98778	-1.9732	0.207458	2.68795	blue	turquoise	brown
SNAP23	-5.48226	9.73742	0.000294874	-1.45699	-0.612718	3.08241	4.11726	cyan	turquoise	palevioletred3
PHGDH	-5.75444	13.9778	5.01625e-05	-2.64279	-1.2075	0.266996	2.19215	blue	green	royalblue
COL9A3	11.9291	13.5905	1.39414e-08	5.61858	8.09036	2.8856	-3.96887	yellow	blue	pink
EZR	-2.71572	11.9747	0.0187864	-0.76513	-0.0838422	3.9857	4.41019	blue	turquoise	darkmagenta
MYL6	-3.07719	13.7201	0.00836054	-0.94642	-0.168109	6.77262	7.32988	green	turquoise	brown
AGO1	-0.545895	11.0184	0.596017	-0.343039	0.206671	3.90992	3.9781	green	green	black
CLSPN	-15.0024	13.8426	5.92868e-10	-5.34879	-4.00948	-1.71207	2.96706	blue	turquoise	brown
RFFL	4.44905	12.9793	0.000658257	0.429833	1.24156	1.97194	1.13625	brown	brown	navajowhite2
UNC13D	1.71811	11.9555	0.111539	-0.182997	1.54526	1.64183	0.960697	red	blue	pink
MFSD11	3.40909	11.801	0.00530012	0.21001	0.95774	2.03057	1.44669	greenyellow	magenta	saddlebrown
DPYSL2	0.0334672	9.21183	0.974016	-0.44064	0.453921	5.67108	5.66444	red	green	lightcyan
TGFB2	8.54897	9.56186	8.79046e-06	2.7353	4.68005	4.41853	0.710859	brown	blue	turquoise
GPATCH2	2.33099	13.9184	0.0353129	0.0283059	0.68493	1.73678	1.38016	grey	brown	red
NUP50	-12.6726	13.9739	4.73229e-09	-1.50977	-1.07263	2.63078	3.92198	blue	turquoise	purple
CDC45	-20.8855	10.6477	5.5262e-10	-3.23161	-2.61317	0.142461	3.06485	blue	turquoise	brown
COMT	0.328365	13.9859	0.7475	-0.292595	0.398371	3.89605	3.84316	turquoise	red	red
ADA2	3.50449	9.16098	0.00649608	0.723378	3.338	2.07429	0.0435944	brown	brown	plum
ECHDC1	-2.01954	11.1877	0.068041	-0.876191	0.0367746	1.66727	2.08698	pink	yellow	pink
LRRFIP2	-10.4545	10.1813	9.10153e-07	-0.853539	-0.554227	3.19289	3.89677	green	turquoise	orangered4
SEC22C	-1.97901	9.64153	0.0770634	-0.547884	0.0338211	3.31039	3.56743	green	yellow	violet
XYLB	-1.6761	13.9747	0.115937	-1.11121	0.136398	-0.391169	0.0962377	blue	turquoise	brown
HDAC6	8.53117	13.5481	8.1614e-07	0.769906	1.2892	3.62789	2.59834	purple	brown	black
CDC6	-15.3891	12.3628	1.96578e-09	-6.2453	-4.70059	-1.92049	3.55245	blue	turquoise	brown
UPRT	1.05789	12.9494	0.309441	-0.162043	0.47278	0.800414	0.645046	magenta	yellow	darkred
CDC23	-5.83206	9.59106	0.00019487	-1.02271	-0.454906	2.42507	3.16388	blue	yellow	brown
AAAS	-9.47011	12.4707	4.72423e-07	-1.48169	-0.929301	2.34831	3.5538	green	turquoise	brown
CBX5	-3.19928	13.9966	0.00643145	-1.0448	-0.206148	4.66003	5.2855	green	turquoise	brown
SUCO	3.25999	12.4048	0.0065618	0.228909	1.14155	3.19396	2.50873	greenyellow	magenta	turquoise
MSH2	-3.30825	13.9736	0.00518815	-1.17516	-0.250634	2.37509	3.08798	midnightblue	yellow	brown
MAP3K1	9.74243	13.4022	1.87784e-07	1.26534	1.9836	4.05348	2.42901	yellow	blue	green
DHPS	-1.41954	12.9347	0.179389	-0.522666	0.108288	2.25383	2.46102	lightcyan	red	green
HOOK2	1.10256	8.97124	0.298915	-0.327919	0.950905	1.03799	0.7265	lightyellow	black	yellow
ARCN1	-3.88728	11.774	0.002235	-0.89842	-0.252151	4.96278	5.53807	midnightblue	yellow	steelblue
TMEM38B	-1.76614	12.5104	0.101744	-0.854308	0.0874583	-0.154533	0.228891	turquoise	turquoise	grey60
PSMD5	-2.61949	11.0986	0.023695	-0.783049	-0.068404	2.9152	3.34092	midnightblue	tan	brown4
PTGS1	8.02021	9.26747	1.82324e-05	2.65188	4.72286	7.23982	3.55245	brown	blue	white
NUP188	-5.4909	13.0207	0.000103147	-1.36651	-0.594919	3.62325	4.60396	green	turquoise	brown
CRAT	0.891562	13.7929	0.387917	-0.153869	0.372272	2.88866	2.77946	lightyellow	black	blue
SH2D3C	-1.95104	8.47541	0.0848209	-1.07477	0.0844244	3.08035	3.57552	black	green	cyan
NANS	-5.37107	8.10362	0.000640554	-1.47336	-0.589614	1.71885	2.75034	turquoise	turquoise	grey
TBC1D2	1.89094	11.1336	0.0849257	-0.121662	1.62123	1.77724	1.02745	yellow	blue	greenyellow
CWF19L1	-3.27127	8.15186	0.0110463	-0.772489	-0.134909	1.95526	2.40896	green	turquoise	brown
SEMA4G	-4.33338	13.132	0.000793327	-2.48766	-0.833578	-2.08757	-0.426953	black	green	mediumpurple3
BTAF1	2.94805	10.0217	0.0145512	0.100769	0.723786	3.73679	3.32451	red	magenta	turquoise
IKZF5	0.620795	12.6575	0.545751	-0.526379	0.949241	0.842993	0.631562	tan	darkred	turquoise
CRTAC1	11.7738	13.9596	1.23148e-08	5.95444	8.60793	7.43955	0.15837	brown	blue	green
BAMBI	5.28534	11.9241	0.00019705	1.23797	2.97661	2.18115	0.0738572	brown	blue	turquoise
WAC	0.761032	8.94235	0.466231	-0.28876	0.581115	4.6506	4.50442	grey60	magenta	yellow
CREM	2.04943	8.09842	0.0741472	-0.0517368	0.894249	1.71057	1.28932	greenyellow	magenta	turquoise
NUBP2	-3.00995	11.4164	0.0114234	-1.25842	-0.198089	2.34222	3.07048	lightcyan	turquoise	red
HIVEP1	4.06367	13.3361	0.00127627	0.303795	0.989696	3.6192	2.97245	purple	blue	red
FKBP5	-0.360643	9.16387	0.72654	-0.747167	0.541208	3.27608	3.37906	grey	grey	lightgreen
SRPK1	-5.47494	11.2699	0.000177423	-1.30525	-0.558276	3.50245	4.43421	midnightblue	yellow	grey60
BRPF3	4.58888	13.8469	0.000433079	0.315436	0.870132	3.49466	2.90188	tan	greenyellow	green
MRPS18A	-3.94528	10.1917	0.00265211	-0.981367	-0.274121	0.474317	1.10206	black	turquoise	pink
TMEM14A	0.0613642	13.6952	0.951956	-0.563691	0.596825	0.137835	0.121268	black	green	lightgreen
EFHC1	5.39272	11.2901	0.000200169	0.455254	1.07982	1.89136	1.12382	purple	brown	black
HSP90AB1	-6.77062	8.24234	0.000123667	-1.23159	-0.608176	7.41406	8.33394	green	turquoise	brown
CDC5L	-2.48254	7.54477	0.0396782	-0.695956	-0.0219924	3.34778	3.70676	green	yellow	darkturquoise
ITPR3	-3.31236	12.4149	0.00593974	-1.55542	-0.323842	4.15129	5.09092	turquoise	turquoise	pink
ZNF184	-2.80924	9.19568	0.019992	-0.606657	-0.0664145	0.600471	0.937006	turquoise	turquoise	mediumorchid
DSP	3.99829	9.24199	0.00295632	1.45808	5.22319	3.34542	0.00478145	white	blue	lightsteelblue1
SIRT1	3.4307	11.5296	0.00526024	0.271192	1.22701	1.9904	1.2413	greenyellow	blue	green
HNRNPH3	0.356044	12.755	0.727628	-0.826757	1.15228	2.6705	2.50774	tan	darkred	magenta
IFT74	4.27884	9.65719	0.00174782	0.344225	1.09983	0.941626	0.219599	greenyellow	blue	cyan
JAK2	4.06997	13.9653	0.00115305	0.375394	1.21224	2.15974	1.36592	darkgreen	blue	grey60
ABL1	-0.998028	12.6704	0.336945	-0.396424	0.146344	4.54491	4.66995	turquoise	red	bisque4
ACOT7	-7.56197	11.3496	9.25508e-06	-1.86059	-1.02411	1.09616	2.53851	turquoise	turquoise	brown4
SH3GLB1	1.38303	9.79984	0.197351	-0.160586	0.682373	5.10746	4.84657	darkgreen	pink	plum2
CDC7	-5.46141	9.59701	0.000319339	-3.07691	-1.28653	-0.560528	1.6212	midnightblue	yellow	purple
SYDE2	7.1942	13.4463	5.7922e-06	1.0873	2.01609	1.10889	-0.442805	brown	blue	red
PCSK5	4.71196	12.2433	0.000477331	0.569106	1.54411	2.06912	1.01252	yellow	brown	violet
SCD	-6.99316	13.9544	6.42914e-06	-2.5474	-1.35131	3.53991	5.48927	blue	turquoise	grey60
TMED1	-1.00401	13.9779	0.332439	-0.898768	0.325672	-0.365168	-0.0786197	black	green	red
ABLIM1	10.4972	11.5561	2.95524e-07	2.02627	3.09348	7.27872	4.71884	yellow	blue	blue
ERMP1	7.23542	12.6027	7.86273e-06	0.795362	1.47562	2.8175	1.68201	magenta	brown	green
RAB18	-0.953638	9.84569	0.363093	-0.752929	0.302267	3.05166	3.27699	grey60	pink	saddlebrown
NRP1	-9.38626	13.9534	2.09203e-07	-3.07996	-1.93391	3.12461	5.63154	turquoise	turquoise	lightcyan
PRTFDC1	-7.29748	12.986	6.06318e-06	-1.41369	-0.767802	-0.484177	0.606568	turquoise	turquoise	brown
PALMD	6.53648	13.4722	1.59192e-05	0.993496	1.96923	5.79934	4.31798	brown	blue	mediumorchid
TSPAN15	-2.13085	10.3718	0.057973	-2.53079	0.0503513	0.0159059	1.25612	black	green	lightcyan
WASHC2A	-1.33679	8.955	0.214258	-0.528404	0.136054	1.53307	1.72925	black	red	green
MAST3	2.09954	7.67417	0.0704512	-0.0911434	1.80261	0.708712	-0.147021	darkred	lightgreen	blue
MZF1	3.96043	8.62126	0.003596	0.2823	1.04629	2.62316	1.95886	purple	purple	turquoise
OCEL1	1.83888	8.45527	0.10122	-0.159988	1.48019	-0.424834	-1.08494	tan	blue	darkred
MYO9B	1.00555	8.88051	0.341245	-0.222614	0.577574	4.69692	4.51944	darkorange	black	darkgrey
KCNK6	-1.03923	12.1866	0.318876	-0.857334	0.302964	1.54472	1.8219	magenta	grey	green
PSMD8	-7.06963	8.76641	6.68641e-05	-2.17297	-1.1162	3.37892	5.0235	blue	yellow	purple
FBXL19	-2.94654	13.5484	0.0109316	-1.2936	-0.201733	2.51413	3.26179	turquoise	red	turquoise
HSD3B7	10.5593	13.4075	7.14466e-08	2.04166	3.08791	0.814882	-1.74991	yellow	brown	orange
SETD1A	0.912012	12.6963	0.378754	-0.326806	0.80231	2.43232	2.19457	tan	greenyellow	turquoise
BCL7C	-0.629247	13.5692	0.539637	-0.452341	0.247601	2.20187	2.30424	black	green	blue
CIRBP	5.86587	13.1785	5.24169e-05	0.85511	1.85003	5.23432	3.88175	lightgreen	brown	midnightblue
CBARP	-5.22383	8.35617	0.000694541	-3.52618	-1.37747	-2.03811	0.413717	black	turquoise	red
HNRNPM	-2.43545	13.1147	0.029877	-0.857158	-0.0516836	4.13564	4.59006	blue	salmon	brown
NDUFB7	-3.54774	13.9784	0.0032223	-1.11715	-0.275251	2.52368	3.21988	blue	turquoise	palevioletred3
TECR	-2.00234	12.263	0.0678683	-0.639474	0.0262321	1.61257	1.91919	turquoise	turquoise	grey60
TIMM13	-7.4155	12.712	5.79358e-06	-2.00741	-1.10003	1.93367	3.48739	turquoise	turquoise	turquoise
CDC34	-2.33486	9.52648	0.0429022	-1.62734	-0.0325666	2.85262	3.68257	turquoise	turquoise	palevioletred3
MTAP	-8.23214	8.87535	1.91561e-05	-2.47463	-1.40597	1.78372	3.72402	midnightblue	turquoise	magenta
CEP170B	-3.15585	8.13592	0.0131935	-0.998741	-0.156815	3.52733	4.1051	turquoise	red	brown
POLR2E	-12.9095	12.2094	1.76111e-08	-1.64629	-1.1716	3.42642	4.83537	blue	turquoise	lightpink4
POLRMT	-1.88391	9.78441	0.0895992	-0.755872	0.0643968	2.48012	2.82585	lightcyan	red	turquoise
RASSF7	-1.81038	10.1413	0.0999211	-1.05667	0.108318	0.697317	1.17149	black	turquoise	darkgreen
GADD45B	9.56259	13.3658	2.3944e-07	2.76903	4.37955	5.35263	1.77833	brown	blue	red
PALM	4.38971	13.5683	0.000662754	0.579877	1.69441	3.98245	2.8453	salmon	blue	pink
MKNK2	8.12556	11.8677	3.44603e-06	1.05781	1.83426	5.71349	4.26745	yellow	brown	pink
ARVCF	0.196574	13.8478	0.847017	-0.840598	1.01004	2.78232	2.6976	lightyellow	black	darkgreen
TRMT2A	-3.52277	10.9936	0.00477923	-0.93691	-0.216329	2.07026	2.64688	turquoise	red	turquoise
RANBP1	-16.1118	11.5361	2.89007e-09	-2.54745	-1.93814	2.29228	4.53508	blue	turquoise	magenta
ZDHHC8	-2.01046	9.56818	0.0733993	-1.11372	0.0606024	3.1056	3.63216	pink	red	red
KLHL22	4.96156	13.3853	0.000238511	0.480474	1.21777	1.99363	1.14451	royalblue	cyan	tan
MED15	-2.62813	9.44347	0.0264027	-0.842125	-0.0660104	3.49692	3.95099	pink	red	orangered3
SERPIND1	-3.89277	12.4857	0.00198997	-4.61655	-1.31236	-4.04828	-1.08383	blue	turquoise	purple
SNAP29	1.46517	13.9247	0.165087	-0.117106	0.621231	2.32744	2.07538	tan	darkred	black
CRKL	-3.89846	8.49965	0.00405017	-0.580329	-0.151708	4.08329	4.44931	green	turquoise	turquoise
LZTR1	-0.934263	10.7679	0.370646	-0.585532	0.237215	1.81453	1.98869	magenta	red	yellow
MMP11	1.13829	13.5125	0.27478	-0.539163	1.74992	0.305293	-0.300087	lightyellow	black	blue
CECR2	4.0749	11.2915	0.00174102	1.16622	3.88712	1.21109	-1.31558	yellow	blue	skyblue
SMARCB1	-7.27334	13.781	4.46299e-06	-1.14228	-0.621416	2.90815	3.79	turquoise	turquoise	ivory
BCL2L13	-0.723499	12.5119	0.482681	-0.36165	0.18073	3.27905	3.36951	turquoise	green	turquoise
CABIN1	1.95883	8.36098	0.0842532	-0.0482446	0.621055	4.00987	3.72346	orange	black	yellow
TBC1D10A	4.63907	10.96	0.000724652	0.513448	1.44127	1.18757	0.210213	yellow	brown	greenyellow
SF3A1	0.140683	13.9964	0.890125	-0.483454	0.551327	4.18905	4.15511	tan	salmon	brown
GGT5	-2.73958	13.9389	0.0160192	-1.37182	-0.166775	1.9444	2.71369	blue	turquoise	lightgreen
RNF215	2.53818	12.6398	0.0251771	0.0987236	1.25016	2.22764	1.5532	royalblue	black	darkred
SEC14L2	-2.87512	13.925	0.0122828	-1.18603	-0.17226	1.34131	2.02045	blue	turquoise	brown
SPECC1L	-3.1938	9.99083	0.00960291	-0.634122	-0.1129	2.22823	2.60175	pink	turquoise	turquoise
PPIL2	-1.19721	10.9548	0.256489	-0.595007	0.175892	2.48153	2.69108	blue	red	plum2
YPEL1	5.25164	10.2534	0.000342992	1.17969	2.90834	0.163632	-1.88038	salmon	cyan	midnightblue
SNRPD3	-9.36264	13.2422	3.30918e-07	-1.46755	-0.918098	3.02523	4.21806	blue	turquoise	purple
PES1	-8.74381	9.13261	9.82039e-06	-1.77536	-1.04683	3.26054	4.67163	blue	turquoise	brown4
MAPK1	-3.72993	11.6637	0.00301297	-0.914151	-0.238612	4.69736	5.27375	blue	yellow	brown
PPM1F	-4.01328	13.6686	0.00134114	-1.15455	-0.349122	4.79501	5.54685	blue	green	cyan
SLC35E4	-3.51486	7.4768	0.00880742	-1.58297	-0.319467	1.22931	2.18053	turquoise	turquoise	pink
CRYBB2P1	0.0519677	10.0812	0.95957	-0.296025	0.310179	0.641377	0.6343	lightcyan	red	turquoise
MFNG	-8.02947	11.9012	3.81916e-06	-0.796205	-0.456082	4.50989	5.13604	blue	turquoise	black
CARD10	3.94898	13.6818	0.00151638	0.396196	1.34269	3.9725	3.10305	salmon	cyan	black
LRP5L	1.24203	13.0043	0.236159	-0.248657	0.921316	-0.786558	-1.12289	red	black	green
SLC25A1	-7.72154	13.2231	2.95682e-06	-1.00438	-0.565816	2.66364	3.44874	blue	turquoise	blue
GRK3	2.82043	9.77414	0.018534	0.155943	1.34699	0.53086	-0.220606	brown	blue	blue
GGA1	-1.00006	8.89584	0.343704	-0.470515	0.182391	3.03718	3.18125	green	red	orange
HIRA	-2.13245	9.0963	0.0614574	-0.811511	0.0232988	0.31403	0.708136	black	turquoise	turquoise
LGALS1	-10.0383	10.2925	1.2203e-06	-4.06547	-2.59317	4.17817	7.50748	blue	turquoise	brown
HPS4	1.4626	13.011	0.167309	-0.0931322	0.483669	2.48831	2.29304	darkturquoise	black	yellow
PIK3IP1	8.62551	10.9085	3.35843e-06	2.25352	3.79971	3.07797	0.0513525	orange	brown	tan
SRRD	-2.13366	7.30768	0.0686454	-0.844666	0.0397842	1.31028	1.71272	pink	turquoise	turquoise
PATZ1	1.85674	11.8943	0.0882756	-0.0394907	0.491792	2.46424	2.23809	lightyellow	black	red
TRIOBP	8.42038	12.6972	1.49913e-06	0.885245	1.49825	5.49034	4.29859	brown	brown	black
TFIP11	-3.00671	13.5658	0.00970669	-0.740582	-0.122828	2.49643	2.92814	lightcyan	turquoise	turquoise
GCAT	-3.07795	13.0333	0.00879014	-0.979726	-0.171739	0.986489	1.56222	lightcyan	green	red
ANKRD54	-12.1062	12.5477	2.74467e-08	-1.62762	-1.13315	1.29472	2.6751	turquoise	turquoise	turquoise
EIF3L	0.89626	8.68401	0.39428	-0.233349	0.53678	4.56838	4.41666	grey60	darkturquoise	tan
SNU13	-4.80488	9.48074	0.000835048	-0.933448	-0.338981	3.67447	4.31069	green	yellow	turquoise
MICALL1	-3.24473	7.46449	0.0129596	-1.14203	-0.18617	3.39922	4.06332	turquoise	red	turquoise
CCDC134	-2.48742	11.0365	0.0301094	-1.09947	-0.0673918	-0.463592	0.11984	blue	turquoise	royalblue
DEPDC5	1.84647	12.8961	0.0878938	-0.0352525	0.447666	1.05819	0.851987	magenta	black	darkgreen
PICK1	4.38908	13.0937	0.000720203	0.481943	1.41494	1.55649	0.608054	brown	brown	turquoise
TTC28	9.87435	11.0824	7.89611e-07	1.14949	1.80815	4.50616	3.02734	yellow	brown	black
CENPM	-7.74591	7.3273	8.81436e-05	-6.82381	-3.65396	-4.04281	1.19608	blue	turquoise	brown
TPTEP1	1.3436	13.3832	0.201416	-0.484781	2.09207	-0.204422	-1.00807	grey	blue	plum1
KDELR3	-2.27976	11.2615	0.0430351	-1.0721	-0.0203649	2.3646	2.91083	cyan	tan	darkgrey
DDX17	9.50656	8.59056	7.56722e-06	0.590211	0.962358	7.35677	6.58049	purple	blue	yellow
TCF20	0.879647	9.65286	0.400419	-0.127986	0.293622	3.61682	3.534	red	grey	midnightblue
HSCB	-2.30281	8.73242	0.0476298	-0.994024	-0.00652554	-0.550205	-0.0499298	black	yellow	green
CBY1	1.92418	13.9984	0.0749042	-0.0329485	0.607666	0.896382	0.609024	magenta	cyan	tan
TOMM22	-7.26675	10.1571	2.48665e-05	-1.53436	-0.815384	2.84715	4.02202	blue	turquoise	darkturquoise
XBP1	2.47417	10.1512	0.0325433	0.032174	0.603338	4.60931	4.29155	red	blue	darkgrey
RTCB	-4.69117	12.052	0.000516149	-1.35033	-0.494096	3.7163	4.63851	blue	turquoise	lavenderblush3
JOSD1	-1.29069	9.04398	0.228827	-0.564141	0.154061	4.22161	4.42665	green	yellow	cyan
FBXO7	1.07969	7.49556	0.313794	-0.502866	1.36906	4.6273	4.1942	darkred	lightgreen	yellow
GTPBP1	6.31217	9.31267	0.000119822	0.451667	0.952233	4.12039	3.41844	purple	brown	blue
POLDIP3	-2.05814	12.4043	0.061224	-0.492292	0.0131328	3.41408	3.65366	turquoise	turquoise	grey60
RAB36	-0.524981	12.9396	0.608474	-0.896801	0.546289	-0.405447	-0.23019	green	red	brown
TIMP3	3.37948	12.6792	0.00509417	0.676272	3.09031	2.68915	0.805859	greenyellow	blue	red
PPP6R2	-0.997881	11.4784	0.338909	-0.489192	0.18292	3.59446	3.74759	darkturquoise	red	paleturquoise
SBF1	-2.5545	11.5562	0.0258963	-0.889325	-0.068701	4.10133	4.58034	lightcyan	red	red
SUN2	4.70623	9.35442	0.000999616	0.355872	1.00739	4.71308	4.03145	salmon	brown	skyblue
CYB5R3	2.7137	13.9995	0.0168001	0.121906	1.04108	5.57514	4.99365	tan	greenyellow	lightsteelblue1
DNAL4	2.84877	13.3202	0.0134152	0.140893	1.01636	1.4445	0.865871	royalblue	cyan	blue
LMF2	-1.18325	9.51172	0.265438	-0.447799	0.138572	3.91869	4.07331	green	red	blue
RHBDD3	-1.91242	8.80762	0.088831	-0.97633	0.0834118	1.33982	1.78628	lightcyan	red	turquoise
PACSIN2	2.10768	12.0998	0.0565802	-0.0111088	0.688349	3.88946	3.55084	royalblue	brown	brown
TTLL1	3.38151	10.9938	0.00613089	0.203419	0.962083	0.343268	-0.239483	salmon	cyan	mediumpurple3
AP1B1	-10.8535	13.9945	3.36949e-08	-1.68747	-1.13057	3.75109	5.16011	blue	turquoise	blue
HMGXB4	-3.943	13.8365	0.00150329	-0.804399	-0.237197	1.91668	2.43747	blue	turquoise	brown
TOM1	2.79967	13.9306	0.014244	0.143419	1.08472	2.53105	1.91698	royalblue	cyan	skyblue1
NEFH	-4.27515	7.83496	0.00283803	-3.85938	-1.14831	-3.21792	-0.714077	turquoise	turquoise	maroon
CHKB	-1.18307	7.90209	0.271151	-1.27034	0.410081	-1.16555	-0.735421	green	red	yellow
HMOX1	-6.91368	9.04527	6.79092e-05	-4.75681	-2.41273	0.269532	3.8543	turquoise	turquoise	brown4
MCAT	-7.80277	12.0305	4.77432e-06	-0.917418	-0.516992	0.709327	1.42653	turquoise	turquoise	turquoise
THOC5	-7.8793	10.8682	8.12505e-06	-1.42197	-0.800291	2.79447	3.9056	green	turquoise	lightpink4
MCM5	-17.7092	9.19471	2.0358e-08	-3.14092	-2.4314	2.08388	4.87004	blue	turquoise	brown
ARSA	-2.97369	11.4742	0.0121411	-1.41224	-0.214354	1.07458	1.88787	black	green	darkseagreen4
TSPO	-3.507	13.6388	0.00361332	-1.45192	-0.348247	4.10732	5.00741	blue	turquoise	blue
TTLL12	-12.8843	13.8349	4.29849e-09	-2.48055	-1.77188	1.79618	3.9224	blue	turquoise	violet
CBX7	11.2112	12.6699	6.06322e-08	3.00653	4.44653	2.35609	-1.37044	yellow	blue	tan
PDGFB	-3.54961	13.9997	0.00320351	-1.91999	-0.473666	2.81765	4.01448	turquoise	green	darkgreen
RPL3	3.38674	11.9196	0.00544883	0.138313	0.638333	7.24427	6.85595	lightgreen	brown	blue
ZMAT5	-2.59679	12.2984	0.0229754	-1.09104	-0.0969477	-0.320115	0.27388	black	turquoise	red
RBFOX2	1.023	13.9769	0.323687	-0.138335	0.390568	5.17778	5.05166	red	royalblue	blue
SYNGR1	7.57382	12.713	4.63682e-06	1.73967	3.13265	1.86845	-0.567705	yellow	blue	saddlebrown
TAB1	0.180198	11.3327	0.860179	-0.26258	0.309592	2.09843	2.07493	black	black	lightyellow
ASCC2	-0.511649	7.3993	0.62381	-0.919689	0.589548	2.91206	3.07713	darkred	lightgreen	brown
MTMR3	9.98766	13.4293	1.37285e-07	1.44975	2.24672	1.40204	-0.446199	magenta	brown	navajowhite2
MIEF1	-6.28427	7.78978	0.000264601	-1.23962	-0.571791	2.35739	3.2631	turquoise	turquoise	royalblue
APOL1	8.05268	7.75139	4.97981e-05	2.14953	3.88823	4.02444	1.00556	yellow	blue	black
MYH9	2.16511	11.7106	0.0517798	-0.00393653	0.869895	8.94041	8.50743	purple	brown	blue
SAMM50	-6.63991	13.5794	1.29802e-05	-1.15211	-0.588295	2.1126	2.9828	turquoise	turquoise	blue
TXN2	-5.97497	12.2329	5.96508e-05	-0.738009	-0.344205	2.73871	3.27982	turquoise	turquoise	darkorange
FOXRED2	-3.87169	11.6408	0.00234602	-1.89604	-0.527499	0.258018	1.46979	pink	turquoise	darkorange
EIF3D	-4.44212	11.7423	0.00084689	-0.822363	-0.280232	5.1354	5.6867	green	turquoise	blue
TNRC6B	7.57582	9.42079	2.64744e-05	0.801181	1.47678	4.96638	3.8274	purple	blue	greenyellow
SGSM3	-0.667637	9.68491	0.519956	-1.07772	0.582461	-0.753529	-0.505898	darkturquoise	red	turquoise
IFT27	1.66058	13.9375	0.11912	-0.105148	0.825003	1.6267	1.26677	lightyellow	black	blue
KIAA0930	-3.83793	11.9098	0.00239291	-1.18636	-0.326679	2.38448	3.141	turquoise	green	blue
CSF2RB	11.0719	13.947	2.71138e-08	2.21399	3.2783	6.68249	3.93634	brown	blue	green
SLC25A17	-4.8129	12.3217	0.000393763	-1.17397	-0.44374	1.30427	2.11312	blue	yellow	brown
FAM118A	1.81103	13.253	0.0928533	-0.216957	2.49375	3.16827	2.02987	purple	brown	floralwhite
KCTD17	-2.26475	12.5592	0.0419295	-0.840716	-0.0183289	1.86779	2.29731	turquoise	green	ivory
ST13	2.41545	11.6861	0.0330859	0.0274697	0.549191	4.44658	4.15825	red	blue	mediumpurple3
RBX1	-4.63526	8.24984	0.00154559	-1.26503	-0.427452	2.3345	3.18074	blue	yellow	blue
EP300	3.80321	11.5086	0.00270415	0.249918	0.927865	4.59221	4.00332	yellow	blue	yellow
L3MBTL2	-3.75617	9.87785	0.0038271	-0.860732	-0.219105	2.41535	2.95527	green	red	brown
RANGAP1	-11.2088	11.9845	1.04298e-07	-2.7578	-1.86003	3.26448	5.5734	lightcyan	turquoise	royalblue
ZC3H7B	-1.56948	10.7737	0.145419	-0.592747	0.100017	5.04662	5.29299	green	red	bisque4
PHF5A	-8.30473	8.18787	2.90553e-05	-2.0309	-1.15091	0.839508	2.43042	blue	yellow	magenta
ACO2	-2.14987	12.0572	0.0525511	-0.568107	0.00364896	2.84375	3.12598	black	red	blue
POLR3H	-3.74681	13.1309	0.00240272	-1.38662	-0.373045	2.09535	2.97518	turquoise	turquoise	turquoise
TRMU	-5.08344	7.9882	0.000953387	-1.61205	-0.605738	1.95134	3.06024	blue	turquoise	magenta
PMM1	-0.988721	9.52017	0.347262	-1.02767	0.398942	-0.553812	-0.239449	blue	turquoise	blue
DESI1	-7.50022	12.9669	4.56755e-06	-1.68298	-0.930109	3.09247	4.39901	blue	turquoise	magenta
CERK	-5.21726	11.9997	0.000215702	-1.68776	-0.693362	3.85041	5.04097	turquoise	green	bisque4
BRD1	1.53771	10.131	0.154743	-0.110505	0.605535	3.03398	2.78646	grey	black	darkgreen
ZBED4	-4.3939	13.2163	0.000698584	-0.960515	-0.328025	2.43115	3.07542	turquoise	green	steelblue
HDAC10	-0.726883	9.36913	0.485062	-1.08586	0.555339	-1.20415	-0.938892	black	red	brown
ABHD4	6.77618	13.5194	1.07014e-05	0.899567	1.73683	2.76053	1.44233	yellow	brown	darkorange
KHNYN	1.01295	13.8552	0.328449	-0.243031	0.677227	3.57195	3.35485	black	red	midnightblue
FKBP3	-5.84052	12.2893	7.23268e-05	-1.32614	-0.606895	1.05658	2.0231	pink	yellow	brown
SDR39U1	2.96839	11.5148	0.0122164	0.203001	1.34337	-0.810495	-1.58368	magenta	purple	green
RBM23	6.65493	13.8375	1.1531e-05	0.342075	0.667951	4.00361	3.4986	purple	blue	pink
PRMT5	-9.21169	12.4032	6.68453e-07	-1.55538	-0.962071	2.16421	3.42294	turquoise	turquoise	magenta
AP4S1	6.1017	11.0822	7.47812e-05	0.503175	1.07021	1.06114	0.27445	brown	blue	darkslateblue
POLE2	-5.46832	8.47994	0.000487192	-3.53291	-1.4515	-1.47273	1.01947	blue	turquoise	brown
VCPKMT	0.397275	10.2427	0.699317	-0.609772	0.875433	-0.350898	-0.483729	grey60	pink	turquoise
SOS2	6.25207	11.9402	4.33684e-05	0.605286	1.25338	3.39235	2.46301	greenyellow	brown	darkred
CDKL1	-1.6449	8.22896	0.137558	-2.41778	0.398881	-1.77013	-0.760679	turquoise	turquoise	brown
NIN	-2.91909	10.7769	0.0142385	-0.723549	-0.100583	3.8835	4.29557	green	turquoise	brown
PYGL	-3.66836	7.54712	0.00699761	-2.25592	-0.503198	2.11208	3.49163	blue	turquoise	brown
PSMC6	-4.39422	12.687	0.000767571	-0.982546	-0.333768	2.62091	3.27907	green	yellow	purple
GNPNAT1	-10.4352	12.6193	1.43594e-07	-2.46448	-1.61693	0.631413	2.67212	pink	turquoise	magenta
DDHD1	1.12455	12.4759	0.281952	-0.152082	0.479372	2.18961	2.02597	red	grey	red
CDKN3	-12.3192	9.28763	4.60188e-07	-5.1919	-3.58736	-2.56653	1.82309	blue	turquoise	brown
CNIH1	1.29061	9.12616	0.228576	-0.215677	0.791509	3.36538	3.07746	greenyellow	pink	orange
CGRRF1	2.00049	11.2821	0.0700996	-0.0326473	0.706645	0.422654	0.0856548	greenyellow	pink	turquoise
ATP6V1D	-4.54078	8.97456	0.00141454	-1.25449	-0.419948	2.2827	3.11992	turquoise	turquoise	darkolivegreen
PLEK2	-3.39253	9.60638	0.00725688	-5.22456	-1.06841	-3.9262	-0.77971	turquoise	turquoise	brown4
PIGH	3.87778	13.7313	0.00173054	0.269831	0.940482	0.846248	0.241092	white	blue	green
PSMA3	-6.48243	9.85799	7.52849e-05	-1.77247	-0.864366	2.44071	3.75913	blue	yellow	brown
VTI1B	0.625645	8.02181	0.54893	-0.341893	0.59665	2.79394	2.66656	pink	lightcyan	blue
TIMM9	-0.697592	12.7619	0.497946	-0.753039	0.385952	0.710077	0.89362	pink	yellow	black
GSTZ1	-3.89965	11.3448	0.00234046	-1.37589	-0.385453	0.0469474	0.927621	blue	turquoise	brown
KIAA0586	-2.0234	13.7796	0.0628755	-0.740213	0.0221113	2.28713	2.64618	green	tan	darkturquoise
TMED8	-4.49073	12.1039	0.000723043	-1.02533	-0.355847	2.43142	3.12201	midnightblue	yellow	red
AHSA1	-7.27055	8.60488	5.94912e-05	-1.68065	-0.878718	3.2974	4.57708	green	turquoise	darkturquoise
DAAM1	2.76425	13.8681	0.0153211	0.0980521	0.779745	2.94436	2.50546	grey	grey	steelblue
SPTLC2	6.41977	12.3708	2.86683e-05	0.57163	1.15604	5.65097	4.78713	brown	blue	black
RIN3	4.48416	11.2991	0.000865838	0.637555	1.85901	1.95664	0.70836	tan	brown	skyblue2
LGMN	0.746093	12.2243	0.469717	-0.292837	0.598773	3.46877	3.3158	grey	green	blue
ALKBH1	-3.89504	7.68092	0.00495314	-1.54932	-0.391763	0.283827	1.25437	cyan	yellow	turquoise
SNW1	-4.20132	11.5055	0.00134515	-0.798599	-0.25144	3.24575	3.77076	blue	turquoise	pink
ITPK1	0.319719	13.9078	0.753934	-0.242669	0.327629	2.98386	2.94138	tan	salmon	skyblue
DHRS7	1.2639	10.3937	0.233875	-0.267371	0.976681	1.85907	1.50441	magenta	lightyellow	blue
PPM1A	3.62766	7.99705	0.00671193	0.392982	1.76456	3.41926	2.34049	darkred	orange	yellow
SIX4	-0.181654	13.4166	0.85857	-0.792991	0.669619	-0.535089	-0.473403	black	green	red
CEP128	-7.45248	11.4999	9.86747e-06	-2.27197	-1.24018	-0.730358	1.02572	blue	turquoise	brown
ERH	-4.98018	9.39959	0.000666466	-1.85096	-0.699793	2.26315	3.53852	cyan	yellow	brown
HIF1A	1.81131	9.37618	0.102184	-0.123706	1.14899	5.75539	5.24275	greenyellow	blue	green
SUSD6	14.0252	13.8297	1.4442e-09	1.46984	2.00127	4.42897	2.69341	yellow	blue	indianred4
SRSF5	9.47166	10.4602	1.86189e-06	0.968641	1.55994	5.45218	4.18789	purple	brown	blue
EIF5	-8.09547	9.43903	1.51129e-05	-1.42425	-0.805554	4.52499	5.63989	blue	turquoise	brown
DICER1	4.42917	12.5877	0.000733962	0.233912	0.682292	4.19268	3.73458	purple	blue	midnightblue
ZFYVE21	3.76242	13.9119	0.00212265	0.23007	0.841003	3.28645	2.75091	brown	blue	blue
MTHFD1	-11.2971	13.6257	2.67042e-08	-2.10755	-1.43353	2.35486	4.1254	blue	turquoise	brown
ZC3H14	-4.09022	13.3962	0.00120267	-0.649066	-0.201279	3.24806	3.67324	midnightblue	yellow	grey60
TELO2	-1.28944	8.72574	0.230375	-1.01748	0.280929	2.18821	2.55649	turquoise	red	blue
PCNX1	10.3961	11.891	2.5473e-07	0.889648	1.36204	4.71913	3.59329	brown	blue	yellow
GSKIP	-1.82719	11.3594	0.0940409	-0.906134	0.0823545	1.24408	1.65597	cyan	yellow	red
VRK1	-2.99493	7.9067	0.0174359	-2.0197	-0.260445	1.17567	2.31574	blue	yellow	purple
PSMC1	-7.17747	8.14804	8.62573e-05	-1.75879	-0.905496	0.625843	1.95798	green	turquoise	turquoise
PAPLN	2.04503	13.689	0.0605744	-0.0336666	1.35341	0.829371	0.169502	red	blue	lightgreen
RPS6KA5	13.4367	13.9126	2.33683e-09	1.71734	2.37019	1.92231	-0.121457	yellow	brown	midnightblue
PPP4R3A	-2.58431	12.0375	0.0238569	-0.424547	-0.0362152	3.21564	3.44602	pink	tan	grey60
C14orf93	3.01939	10.7517	0.0119502	0.236356	1.52099	0.469876	-0.408798	yellow	brown	black
PSMB5	-8.01188	13.9798	1.35906e-06	-1.72662	-0.997318	3.65546	5.01743	blue	turquoise	darkolivegreen
YY1	1.79655	10.2806	0.101806	-0.0337869	0.32053	4.33011	4.18673	tan	blue	green
ACIN1	-0.477796	8.89167	0.644322	-0.405121	0.264047	4.88811	4.95865	red	midnightblue	turquoise
CCNB1IP1	0.573559	11.5006	0.57731	-0.223294	0.38182	2.15982	2.08055	green	yellow	yellow
TRIP11	4.24728	10.616	0.00148468	0.32149	1.01947	4.00101	3.33053	darkgreen	magenta	green
APEX1	-8.65303	12.7711	1.06686e-06	-1.24402	-0.746215	3.56278	4.55789	blue	turquoise	blue
PABPN1	-1.88802	9.8227	0.0888825	-1.03648	0.0869064	1.85036	2.32515	black	turquoise	turquoise
ARHGAP5	7.29659	8.51012	6.13317e-05	0.895479	1.71058	4.00215	2.69912	yellow	blue	green
CINP	-5.2003	9.41352	0.000487784	-0.827714	-0.328222	1.65531	2.23328	blue	turquoise	brown
SRP54	-4.87662	12.2293	0.000360482	-1.27114	-0.487177	2.64146	3.52062	cyan	yellow	darkgrey
CHD8	-3.05458	10.8897	0.0110766	-0.381773	-0.0617767	4.39446	4.61623	green	turquoise	turquoise
PCK2	3.36211	12.8589	0.0051715	0.229146	1.05559	2.32161	1.67924	purple	blue	orange
KIAA0391	0.181694	13.392	0.858544	-0.271172	0.321135	0.464879	0.439898	grey	grey	greenyellow
DCAF11	3.81394	13.2985	0.00206857	0.378412	1.36202	3.16933	2.29911	yellow	brown	black
PSMA6	-1.90696	8.93776	0.0891193	-1.70569	0.146217	-1.0238	-0.244067	cyan	yellow	orangered4
NFKBIA	11.9313	8.50512	1.32899e-06	2.84328	4.1884	6.65613	3.14028	yellow	blue	green
EMC9	-6.56954	12.327	2.32912e-05	-1.80128	-0.906026	-0.575942	0.777711	turquoise	turquoise	skyblue3
PSME2	-0.328498	13.3137	0.747645	-0.389539	0.286497	2.89696	2.94848	red	grey	darkturquoise
BRMS1L	1.79796	13.0983	0.0952611	-0.0990035	1.08584	-0.155018	-0.648434	magenta	pink	yellow
REC8	1.40419	13.6451	0.182612	-0.214295	1.02121	0.691643	0.288187	brown	blue	lightcyan1
TM9SF1	-5.0599	12.3395	0.000256751	-0.99366	-0.396761	-0.633307	0.0619034	black	turquoise	turquoise
SEC23A	-5.16812	10.3496	0.000376363	-1.0025	-0.400415	4.80672	5.50818	blue	yellow	bisque4
GMPR2	-0.516025	13.8297	0.613988	-0.359879	0.220423	3.21182	3.28155	green	royalblue	green
PNN	-1.7937	11.6561	0.0988218	-0.647911	0.0638634	3.58905	3.88107	green	turquoise	turquoise
RABGGTA	-3.3764	12.1261	0.00542966	-0.857617	-0.185356	1.53542	2.05691	turquoise	red	turquoise
NFATC4	2.37657	12.6503	0.0340042	0.0627537	1.35684	3.53965	2.82986	darkorange	black	violet
PLTP	4.95807	8.10913	0.00106607	0.83097	2.26975	4.22047	2.67011	yellow	brown	ivory
PCIF1	3.51033	13.1114	0.00379173	0.254706	1.0681	2.3137	1.6523	tan	greenyellow	yellow
GSS	-10.716	11.3434	2.80783e-07	-1.53801	-1.01547	1.91612	3.19286	blue	turquoise	brown4
TRPC4AP	-2.2342	13.9946	0.0423007	-0.531211	-0.0108375	4.32135	4.59238	lightcyan	red	darkgrey
PYGB	-3.96931	12.2498	0.00179073	-0.84623	-0.247319	4.06809	4.61486	lightcyan	red	black
ABHD12	-3.17971	11.1359	0.00864028	-0.664294	-0.12131	2.02709	2.41989	turquoise	turquoise	skyblue
PROCR	4.28159	10.7716	0.00135805	0.38908	1.21667	6.35288	5.55001	brown	blue	white
GINS1	-16.0668	11.0107	5.44983e-09	-5.5105	-4.18278	-2.16456	2.68208	blue	turquoise	brown
NINL	4.99238	13.9928	0.000197587	0.950494	2.38243	3.22231	1.55585	orange	cyan	paleturquoise
CD40	3.83116	12.9369	0.00209802	0.397246	1.42571	2.45942	1.54794	lightgreen	brown	blue
UQCC1	-1.69217	11.375	0.117795	-0.513275	0.0660686	2.05333	2.27693	blue	turquoise	orangered4
ZMYND8	0.038162	10.235	0.970293	-0.315279	0.326302	4.56896	4.56345	grey	midnightblue	green
IFT52	2.4013	12.6134	0.0325319	0.036737	0.716665	2.22247	1.84577	yellow	grey60	blue
MYBL2	-14.2848	8.36983	3.60566e-07	-6.66714	-4.82598	-1.26144	4.48513	blue	turquoise	brown
NDRG3	-4.17398	8.06673	0.00304885	-1.49977	-0.433325	1.87574	2.84229	cyan	yellow	darkturquoise
C20orf24	-3.15781	10.4637	0.00966236	-1.51532	-0.265963	-0.318586	0.572055	black	green	magenta
NFATC2	5.06341	13.3195	0.000201599	1.25587	3.11713	3.18274	0.996238	yellow	brown	lightcyan
PABPC1L	0.449658	10.7077	0.661923	-0.832678	1.25848	-1.07204	-1.28494	green	salmon	green
STK4	0.798842	13.6493	0.438062	-0.25105	0.547913	3.34791	3.19947	red	blue	yellowgreen
ADNP	1.98863	13.8661	0.0668492	-0.0334699	0.875478	3.57354	3.15253	tan	greenyellow	yellow
PFDN4	-2.88311	13.8964	0.0121117	-1.40886	-0.206403	0.765558	1.57319	cyan	tan	skyblue2
DOK5	4.10145	11.0485	0.00173923	1.02118	3.38376	1.5672	-0.635264	white	blue	grey60
CSTF1	-6.40373	9.39397	0.00010315	-0.981899	-0.471678	1.96939	2.69618	blue	yellow	yellow
RAE1	-12.6566	12.242	2.14427e-08	-1.76781	-1.24952	1.41099	2.91965	blue	turquoise	magenta
TPD52L2	-9.43736	12.5354	4.70864e-07	-0.942495	-0.590289	4.28447	5.05086	blue	turquoise	bisque4
DNAJC5	-6.4505	9.83551	7.91851e-05	-1.49612	-0.7266	4.07399	5.18535	lightcyan	turquoise	red
NELFCD	-6.03818	13.8725	3.16954e-05	-0.88948	-0.422911	2.89199	3.54819	blue	turquoise	turquoise
CTSZ	2.09782	11.9751	0.0578147	-0.0089347	0.468944	5.128	4.898	brown	blue	blue
PRPF6	4.13029	8.18474	0.00313849	0.327026	1.14649	4.63607	3.89931	brown	brown	green
PRELID3B	-3.56047	7.91982	0.00751825	-1.66923	-0.355538	2.11299	3.12538	cyan	yellow	turquoise
MTG2	-2.60624	13.3261	0.0213947	-0.724103	-0.0686248	1.3351	1.73146	turquoise	turquoise	yellow
PSMA7	-7.65791	12.5664	4.42928e-06	-1.59493	-0.891124	3.78644	5.02947	blue	turquoise	brown
SLCO4A1	-0.130526	12.2972	0.898261	-1.06768	0.946684	1.32262	1.38312	magenta	grey	green
NTSR1	-2.16772	12.0479	0.0509161	-4.46982	0.0104238	-4.05642	-1.82672	turquoise	turquoise	lightcyan1
MRGBP	-8.53365	12.6559	1.32594e-06	-1.29332	-0.769622	1.59409	2.62556	turquoise	turquoise	turquoise
TCFL5	1.27919	13.4501	0.222459	-0.136063	0.534414	1.20091	1.00174	magenta	black	orange
DIDO1	0.0276449	9.88988	0.978495	-0.270322	0.277103	4.15173	4.14834	darkturquoise	black	yellow
GID8	0.719578	11.9335	0.485639	-0.186034	0.36934	3.40598	3.31432	lightyellow	green	mediumpurple3
SLC17A9	-10.1947	10.692	7.7189e-07	-3.17821	-2.04628	1.10287	3.71511	lightcyan	turquoise	royalblue
ARFGAP1	-1.81187	11.6517	0.0958377	-0.944166	0.0883694	3.64217	4.07007	lightcyan	red	red
EEF1A2	8.29306	9.80146	9.74502e-06	2.0592	3.57791	4.15938	1.34083	yellow	blue	plum1
GMEB2	-1.55812	8.7447	0.154614	-0.53086	0.0989748	1.85374	2.06968	pink	turquoise	turquoise
C20orf27	-13.1778	13.9995	2.78847e-09	-1.87793	-1.3522	1.55291	3.16797	turquoise	turquoise	brown
CDC25B	-4.81252	13.7321	0.000291176	-1.39122	-0.532367	2.68265	3.64445	turquoise	turquoise	greenyellow
RNF24	0.172666	12.0792	0.865773	-0.530775	0.622213	1.84126	1.79554	magenta	grey	green
ARFRP1	-0.333881	10.3321	0.745147	-0.46419	0.342746	3.10677	3.16749	darkturquoise	red	yellow
NDUFAF5	-5.25881	8.9743	0.000526469	-1.63183	-0.649885	-0.0457622	1.09509	turquoise	turquoise	turquoise
TRIB3	-9.60786	7.94002	1.20385e-05	-4.69379	-2.87484	-0.542729	3.24158	turquoise	turquoise	magenta
RASSF2	-2.37631	13.886	0.0324318	-3.36	-0.170772	1.74231	3.5077	turquoise	green	red
CSNK2A1	-8.00269	11.823	4.12172e-06	-1.06403	-0.608037	3.89817	4.73421	green	turquoise	darkorange2
CDS2	2.59319	9.0274	0.0289915	0.0428007	0.625651	4.18593	3.8517	yellow	brown	blue
HM13	-1.25042	13.054	0.233098	-0.821562	0.219021	3.56951	3.87078	pink	salmon	grey60
SNPH	2.44876	13.8082	0.028321	0.0626339	0.955869	1.32224	0.812992	salmon	black	tan
MYLK2	-4.69082	11.5624	0.000577128	-4.33977	-1.57901	-4.94408	-1.98469	turquoise	turquoise	cyan
SEC23B	-4.91364	12.4079	0.000324341	-0.965023	-0.373604	2.79911	3.46842	blue	turquoise	turquoise
CCM2L	11.5302	11.9491	7.86e-08	1.84839	2.71023	2.40028	0.120973	yellow	blue	black
PLCB4	11.9282	9.80101	3.72942e-07	3.32589	4.85902	3.38843	-0.704031	yellow	blue	black
MYL9	12.0446	12.1372	4.12457e-08	2.53639	3.65498	6.03803	2.94234	brown	blue	violet
TM9SF4	2.06513	11.4082	0.0624046	-0.0136354	0.459596	4.22208	3.9991	brown	greenyellow	green
CRNKL1	1.61291	11.1228	0.134754	-0.0636246	0.414393	2.85834	2.68296	red	magenta	ivory
POFUT1	-3.65642	13.9169	0.00261501	-0.583854	-0.151984	3.83715	4.20507	green	turquoise	brown
SAMHD1	0.830851	10.8944	0.423893	-0.322606	0.71312	2.92354	2.72829	magenta	grey	coral2
KIF3B	5.4318	11.2003	0.000193777	0.259167	0.610989	4.01614	3.58106	lightgreen	brown	blue
NOP56	-12.8445	13.3221	6.94815e-09	-2.16349	-1.54181	3.10377	4.95642	green	turquoise	magenta
MANBAL	-0.646412	13.806	0.528613	-0.593698	0.318988	1.21898	1.35633	tan	salmon	brown
IDH3B	-4.76466	13.9702	0.000303744	-1.05307	-0.399204	3.07107	3.7972	green	turquoise	turquoise
MAPRE1	-6.63521	10.9514	3.76365e-05	-1.12161	-0.562625	3.92897	4.77108	midnightblue	yellow	magenta
JAG1	6.2292	12.9184	3.15988e-05	0.621095	1.28129	5.56742	4.61622	purple	blue	darkmagenta
CDK5RAP1	-5.72402	8.1611	0.000410718	-0.92409	-0.39464	1.73926	2.39863	green	turquoise	magenta
SNTA1	-1.71536	11.3052	0.113524	-0.930987	0.113933	-0.184869	0.223658	blue	turquoise	brown
TTI1	-3.89069	13.652	0.00170474	-0.540515	-0.155764	2.35329	2.70143	green	turquoise	blue
E2F1	-7.71457	8.40623	4.32304e-05	-4.86888	-2.64239	-1.35118	2.40446	blue	turquoise	brown
RPRD1B	2.69887	12.2342	0.0190699	0.0931053	0.864748	2.64498	2.16605	brown	blue	blue
PXMP4	4.9984	13.3779	0.000223545	0.579274	1.45675	0.95575	-0.0622601	brown	blue	blue
CHMP4B	1.54757	12.2073	0.147249	-0.115021	0.682682	3.08299	2.79916	tan	greenyellow	blue
CST3	3.19627	13.7546	0.00659394	0.181298	0.924697	4.40065	3.84765	lightgreen	cyan	mediumorchid
ACTR5	-2.47468	10.1289	0.0325622	-0.798083	-0.0425243	0.551629	0.971932	blue	turquoise	brown
AHCY	-11.7502	10.7795	1.75473e-07	-1.99277	-1.36267	3.05263	4.73035	blue	turquoise	brown
PPP1R16B	0.873343	10.3918	0.402207	-0.528822	1.21636	4.79749	4.45372	lightyellow	black	tan
FAM83D	-13.2405	7.08425	2.95985e-06	-6.30202	-4.39604	-2.05243	3.2966	blue	turquoise	brown
DHX35	-2.65879	11.2516	0.0218568	-0.552852	-0.0528273	0.994428	1.29727	blue	turquoise	blue
DNTTIP1	-0.713402	12.9435	0.488261	-0.528016	0.265948	1.17444	1.30548	tan	salmon	brown
MAP1LC3A	5.98238	12.2553	5.85195e-05	0.891454	1.90907	1.09739	-0.302875	salmon	cyan	tan
PIGU	-2.61232	11.4834	0.0234198	-1.1555	-0.101685	1.08307	1.71166	blue	turquoise	magenta
ACOT8	1.17721	13.7374	0.259108	-0.197441	0.675967	1.24173	1.00247	black	black	yellow
APMAP	-2.34629	13.1108	0.0353202	-0.572802	-0.0238762	4.12195	4.42029	turquoise	turquoise	plum2
ZNF516	2.97184	13.6983	0.0103005	0.243017	1.51287	2.39921	1.52127	salmon	cyan	darkgreen
ADNP2	-0.993387	11.4896	0.340982	-0.34912	0.131204	2.71535	2.82431	green	yellow	blue
RBFA	-5.75868	8.38121	0.00035719	-1.33639	-0.576441	0.847017	1.80343	green	turquoise	brown4
USP14	-1.15457	11.2539	0.272195	-1.1872	0.36875	2.40759	2.81681	pink	tan	purple
VAPA	1.75186	13.8858	0.101843	-0.0769196	0.759925	4.9381	4.5966	red	pink	darkorange2
METTL4	-2.13768	13.9089	0.050789	-0.838357	0.00164959	0.219939	0.638293	pink	tan	brown
LPIN2	0.188708	7.97619	0.855034	-0.603726	0.711281	2.83422	2.78044	magenta	lightgreen	green
SMCHD1	2.35615	13.9969	0.0335711	0.0490782	1.04534	4.29602	3.74882	purple	blue	black
MYL12A	-4.03468	10.1758	0.00229904	-1.05653	-0.305895	5.10998	5.79119	green	yellow	steelblue
CEP76	-3.41658	8.12103	0.0089306	-1.43644	-0.28056	-0.0359514	0.822549	turquoise	turquoise	turquoise
CEP192	5.77375	10.2968	0.000160138	0.377478	0.848909	3.94883	3.33563	purple	blue	brown
RNMT	5.56294	11.6301	0.000138191	0.309796	0.711036	2.98034	2.46993	magenta	brown	yellow
SMAD7	7.66367	7.99262	5.9705e-05	2.82651	5.2602	4.55314	0.50979	yellow	blue	ivory
LIPG	-3.13971	11.6228	0.008845	-4.90227	-0.877146	-0.697391	2.19232	blue	green	brown
RNF125	4.61446	13.9585	0.000404314	1.13191	3.09894	1.7086	-0.406826	yellow	blue	pink
ANKRD12	7.66176	13.2143	3.23305e-06	1.21779	2.17204	3.98486	2.28995	yellow	blue	darkred
POLI	4.85505	13.534	0.000280404	0.574248	1.48841	2.15206	1.12073	yellow	magenta	red
MIB1	2.72188	12.481	0.0179925	0.069566	0.616056	4.42662	4.08381	red	grey60	midnightblue
RBBP8	-1.40557	13.831	0.181916	-1.13166	0.236243	1.4022	1.84991	midnightblue	tan	indianred4
RIOK3	1.64412	7.33028	0.142217	-0.321734	1.83507	3.94663	3.18996	darkred	orange	pink
CSTF2	-9.64442	10.7845	1.23801e-06	-1.65988	-1.04181	0.979444	2.33029	blue	turquoise	magenta
PSMD10	-7.64587	10.5442	1.28473e-05	-1.44535	-0.796563	1.97829	3.09925	turquoise	turquoise	antiquewhite4
ATG4A	-13.364	12.6604	7.7722e-09	-2.14536	-1.54686	1.10185	2.94796	turquoise	turquoise	orangered4
STS	0.331067	13.9861	0.745502	-0.370227	0.505371	1.62794	1.56036	magenta	pink	pink
TBL1X	-2.42259	9.92498	0.0360738	-0.690674	-0.0285249	2.28094	2.64054	turquoise	turquoise	brown
GPR143	-1.49603	13.744	0.157254	-1.26605	0.226671	-0.048154	0.471535	black	green	cyan
PGRMC1	4.57536	8.54222	0.00153007	0.305305	0.912239	4.15822	3.54945	purple	blue	brown
POLA1	-5.05383	9.15709	0.000651198	-0.942688	-0.360767	2.37181	3.02354	green	yellow	brown
MID1	6.05996	13.9432	2.98838e-05	0.806206	1.69003	4.35483	3.10671	yellow	blue	green
NKAP	3.32893	13.559	0.00516347	0.143939	0.669867	1.02872	0.621816	magenta	brown	blue
NXT2	-1.01954	7.63522	0.339159	-1.97032	0.769179	-1.25396	-0.653393	grey60	yellow	darkolivegreen
ALG13	3.26737	11.9525	0.00676853	0.189967	0.951434	2.20048	1.62978	brown	brown	bisque4
PRPS2	-8.8123	11.7864	1.57064e-06	-1.83984	-1.10922	0.931566	2.4061	blue	turquoise	brown
MOSPD1	-1.42388	7.51727	0.194637	-2.93796	0.710379	0.222168	1.33596	cyan	lightcyan	turquoise
AMMECR1	-6.48162	13.9213	1.48479e-05	-1.25181	-0.629083	0.545024	1.48547	pink	turquoise	brown
WDR13	1.62856	13.7742	0.126055	-0.0884171	0.642729	3.78648	3.50933	red	black	blue
SUV39H1	-11.9205	9.12066	7.23407e-07	-3.36209	-2.29139	-1.13527	1.69147	blue	turquoise	brown
SRPX	-6.53616	9.47281	8.45883e-05	-2.74784	-1.34278	2.83981	4.88512	blue	turquoise	brown
XIAP	5.0165	9.01825	0.000718095	0.34558	0.912913	3.41745	2.7882	greenyellow	blue	green
STAG2	-0.0826482	9.83674	0.935789	-0.338966	0.314771	4.13466	4.14675	grey60	pink	green
ATP11C	-3.34451	8.35941	0.00954345	-0.858172	-0.160814	3.13362	3.64311	pink	yellow	green
ABCD1	2.18716	13.5869	0.0467536	0.0056649	0.678078	1.91017	1.5683	lightyellow	black	cyan
CCDC22	-0.857779	13.5888	0.40589	-0.575482	0.247339	1.71487	1.87894	green	green	brown
PLP2	-8.32916	12.7277	1.66006e-06	-2.71854	-1.59681	2.51483	4.6725	blue	turquoise	brown
BMX	6.33834	13.9964	1.83592e-05	0.670103	1.35558	5.80795	4.79511	purple	blue	blue
PLS3	-8.17247	12.8547	1.90837e-06	-1.78586	-1.03841	5.38433	6.79647	blue	turquoise	thistle1
NAA10	0.564742	10.0572	0.584625	-0.336159	0.564655	2.75927	2.64502	grey	black	pink
RENBP	1.64817	13.9971	0.121574	-0.257345	1.96535	-0.894947	-1.74895	magenta	cyan	lightyellow
ELF4	0.471358	10.0613	0.64744	-0.238138	0.366061	3.50018	3.43622	magenta	grey	blue
SMARCA1	4.4428	12.8542	0.000681332	0.493468	1.42972	3.36776	2.40616	magenta	brown	yellow
ASB9	-1.72735	13.7466	0.106493	-0.945853	0.102777	-0.738037	-0.316499	blue	turquoise	brown
RBBP7	-10.7851	13.6646	4.60426e-08	-1.46244	-0.976332	3.1302	4.34959	blue	yellow	brown
KCND1	11.219	11.9572	1.05538e-07	2.95886	4.38581	1.27658	-2.39576	yellow	blue	greenyellow
SLC25A14	-2.79878	7.40923	0.0250823	-1.6178	-0.144982	-0.73881	0.142582	cyan	yellow	turquoise
FMR1	1.68015	13.8967	0.115259	-0.115123	0.945019	2.48606	2.07111	greenyellow	pink	darkturquoise
PIM2	1.17274	8.60718	0.272332	-0.44158	1.37867	1.13553	0.666981	darkred	lightgreen	turquoise
SLC35A2	-0.910783	11.7261	0.380751	-0.440651	0.181327	2.09293	2.22259	pink	turquoise	red
PQBP1	-3.29509	12.9464	0.0058312	-0.639759	-0.13294	2.53031	2.91666	blue	turquoise	greenyellow
EMD	-3.38941	13.47	0.00462462	-0.838221	-0.187042	2.15474	2.66737	pink	turquoise	lightpink4
TAZ	3.22261	12.7344	0.0068304	0.147195	0.749799	2.42819	1.97969	red	purple	salmon4
PGK1	-6.00475	9.25384	0.000179961	-1.21837	-0.5536	5.52354	6.40952	green	turquoise	steelblue
MAGT1	1.23456	10.8375	0.243092	-0.172549	0.611564	4.33908	4.11957	greenyellow	pink	lightsteelblue1
SMS	-24.2243	13.4496	1.73927e-12	-2.89854	-2.42535	1.18306	3.845	blue	turquoise	salmon
PHEX	-9.68677	12.1566	4.5376e-07	-4.34231	-2.74946	-5.71076	-2.16487	turquoise	green	blue
UBL4A	-8.66074	10.3126	4.74349e-06	-0.943062	-0.558371	2.45077	3.20149	blue	turquoise	red
CD99L2	5.53962	11.2144	0.000163595	0.613154	1.41848	4.2889	3.27308	lightgreen	brown	blue
EEA1	-1.45235	13.9588	0.168511	-0.858263	0.165328	3.00902	3.35548	pink	tan	pink
RP2	-2.67234	9.48064	0.0244396	-1.09478	-0.0951899	1.85929	2.45427	pink	yellow	turquoise
JADE3	-3.71877	13.7345	0.00236061	-0.838627	-0.22441	1.27284	1.80436	black	turquoise	blue
CDK16	-11.0061	11.6527	1.6575e-07	-1.3767	-0.920444	3.46021	4.60879	turquoise	turquoise	salmon
USP11	8.51612	13.5172	8.4684e-07	0.874691	1.46624	3.54887	2.3784	yellow	blue	red
HTATSF1	-2.00143	9.96485	0.0733135	-0.468682	0.0252333	2.62937	2.85109	black	turquoise	turquoise
TIMP1	6.24108	12.2905	3.87557e-05	1.35726	2.80735	6.58509	4.50278	brown	blue	white
KLHL4	-8.02583	13.8847	1.39411e-06	-2.79133	-1.61333	-0.0168763	2.18546	turquoise	green	green
GABRE	-0.116716	13.9922	0.908744	-0.473551	0.424674	1.5366	1.56104	red	red	turquoise
FGD1	3.20701	8.74756	0.0111085	0.137445	0.805558	2.44376	1.97226	tan	brown	yellow
PIN4	-2.24814	13.9944	0.0412054	-1.44976	-0.0340806	-0.364173	0.377747	cyan	yellow	purple
PORCN	3.41905	13.9048	0.00418905	0.225861	0.987497	1.17842	0.571737	darkorange	purple	coral2
MAGED2	4.52964	12.0763	0.000679325	0.570063	1.62534	6.17097	5.07327	orange	cyan	darkgreen
RBM3	-3.28718	13.995	0.00540042	-1.09481	-0.230231	4.68613	5.34865	green	yellow	blue
KLF8	6.21264	13.7958	2.41921e-05	1.15329	2.37202	2.2023	0.439645	white	blue	pink
SRPX2	2.02339	12.8684	0.0643142	-0.0363711	1.09355	4.97683	4.44825	red	brown	red
SYTL4	2.36151	10.6164	0.0384828	0.0277379	0.841135	3.15471	2.72028	yellow	blue	grey60
CENPI	-12.9721	10.0096	1.38627e-07	-4.71225	-3.3309	-1.67688	2.3447	blue	turquoise	brown
PBDC1	-4.35844	13.5023	0.000710936	-1.51835	-0.514511	0.430453	1.44688	pink	turquoise	turquoise
GLA	-1.48311	11.3873	0.165185	-0.771355	0.148766	1.83851	2.1498	green	yellow	darkolivegreen
ARMCX3	3.01064	12.1315	0.0107331	0.139371	0.866324	3.80721	3.30437	greenyellow	blue	green
BEX4	4.30169	13.3312	0.000814023	0.542307	1.63104	2.015	0.928326	salmon	brown	black
NALCN	2.64868	13.8425	0.0192229	0.207794	1.98672	1.20118	0.103928	red	brown	lightpink4
NDFIP2	-1.69769	8.37677	0.1263	-0.843438	0.124933	1.02679	1.38604	pink	yellow	red
FNDC3A	4.23653	11.2624	0.00132635	0.420955	1.32594	5.15779	4.28434	brown	magenta	greenyellow
CDADC1	2.8286	12.7103	0.0144959	0.154946	1.16673	-0.101364	-0.762202	greenyellow	blue	grey60
CAB39L	-0.909802	12.5278	0.380098	-0.980859	0.4011	-0.0721246	0.217755	black	green	yellowgreen
STK24	0.879033	8.3159	0.404067	-0.201518	0.452459	3.93307	3.8076	magenta	lightyellow	lightgreen
ACP5	8.13618	10.3092	8.39348e-06	4.01174	7.02083	1.15159	-4.36469	yellow	blue	pink
DNAJC3	1.76445	13.574	0.100135	-0.0653492	0.661746	4.68008	4.38188	yellow	blue	darkmagenta
UGGT2	3.27126	9.59864	0.00887391	0.219357	1.17341	2.88648	2.1901	darkgreen	magenta	saddlebrown
ARHGEF7	0.56106	13.5189	0.583937	-0.283883	0.484114	4.1117	4.01158	magenta	midnightblue	lightcyan
PARP4	-3.47779	11.9437	0.00459529	-0.594752	-0.136431	3.9455	4.31109	green	yellow	brown
SUPT20H	-4.68976	11.2977	0.000615225	-1.11758	-0.405204	2.68164	3.44303	blue	yellow	royalblue
MRPS31	-0.414717	8.53388	0.68858	-0.468268	0.324196	1.44556	1.5176	red	yellow	brown
SLC25A15	-7.68745	10.0021	1.66451e-05	-2.34645	-1.29193	-0.446792	1.3724	blue	turquoise	brown
KPNA3	-3.08675	13.8796	0.00811055	-1.48965	-0.267631	2.52229	3.40093	pink	tan	darkolivegreen
FLT1	-0.946496	13.8474	0.360121	-0.747255	0.289991	4.67456	4.9032	black	green	brown
RGCC	-2.20005	13.8834	0.0452484	-3.10665	-0.0382888	-0.313472	1.259	black	turquoise	red
VWA8	-0.30072	13.8233	0.768104	-0.502739	0.379227	1.70546	1.76722	midnightblue	tan	lavenderblush3
[truncated: 10,069 more rows]

## Sheet: CvL
	statistic.t	parameter.df	p.value	conf.int1	conf.int2	estimate.mean.of.x	estimate.mean.of.y	modules.all	modules.CEL	modules.flow
ELN	28.2711	13.9912	9.58791e-14	10.4991	12.223	10.7146	-0.646439	brown	blue	greenyellow
COL23A1	24.211	8.27257	5.67001e-09	9.85153	11.9127	5.34984	-5.53226	yellow	blue	white
PPP1R12B	33.2125	13.8726	1.27566e-14	4.00705	4.56083	5.31624	1.0323	brown	blue	green
CXCL2	19.8309	9.5137	4.65166e-09	6.1706	7.74501	6.53112	-0.426684	purple	blue	plum
TPX2	-17.0866	13.3005	1.95277e-10	-4.83469	-3.75157	0.426424	4.71955	blue	turquoise	brown
SORBS1	25.9055	8.69818	1.54684e-09	5.93357	7.07562	5.2903	-1.21429	brown	blue	blue
ACTA2	25.9575	13.7572	4.39962e-13	7.32964	8.65237	6.98965	-1.00135	brown	blue	pink
TGFB3	25.931	10.1638	1.27441e-10	3.84457	4.56564	3.77232	-0.432789	brown	blue	turquoise
DUSP1	24.0989	10.5884	1.36002e-10	4.62727	5.56233	8.53174	3.43694	brown	blue	green
PTGIS	32.791	13.9835	1.25577e-14	8.5344	9.72911	7.7334	-1.39836	brown	blue	skyblue
ZFP36	23.2942	11.6532	3.89512e-11	6.9554	8.39604	8.07694	0.40122	brown	blue	steelblue
BHLHE40	17.1821	11.0444	2.56418e-09	4.34536	5.62145	7.60939	2.62599	brown	blue	blue
KLF4	32.6297	12.5856	1.53112e-13	7.64185	8.7294	6.81688	-1.36874	yellow	blue	greenyellow
HMGA1	-19.8821	11.3666	3.46913e-10	-4.94693	-3.96431	2.82911	7.28473	turquoise	turquoise	brown
CSRNP1	17.7275	8.18977	8.02464e-08	3.49552	4.53608	6.48493	2.46913	brown	blue	steelblue
ITPR1	28.0326	13.9769	1.10184e-13	3.4277	3.99576	5.31589	1.60416	brown	blue	green
FBLN2	30.7978	13.7107	4.69648e-14	9.26957	10.6603	7.92002	-2.04489	yellow	blue	greenyellow
COL1A2	24.4204	11.319	3.79102e-11	8.33685	9.98228	8.78534	-0.374224	brown	blue	skyblue3
FOS	33.6804	11.8427	3.97489e-13	9.7646	11.1175	9.14534	-1.29569	brown	blue	red
JUNB	26.672	13.8346	2.70939e-13	5.38028	6.32239	8.01425	2.16291	brown	blue	midnightblue
SYNPO2	27.9972	9.86265	9.97113e-11	8.73062	10.2435	6.12986	-3.3572	brown	blue	green
SOCS3	33.8168	10.9529	1.9762e-12	5.93644	6.76345	8.87401	2.52406	brown	blue	magenta
ARID5A	19.6484	9.70052	3.88886e-09	2.95318	3.71221	5.26062	1.92793	brown	blue	green
VEPH1	-25.3409	8.42827	2.97871e-09	-6.46853	-5.39815	-1.30026	4.63308	turquoise	turquoise	royalblue
CEBPD	35.9696	12.6143	4.30942e-14	5.54981	6.26141	5.14839	-0.757218	yellow	blue	green
MMP28	24.3043	10.6247	1.17595e-10	6.34484	7.61445	5.55254	-1.42711	brown	blue	blue
TSPAN6	3.86489	8.35197	0.00439923	0.487565	1.90425	3.98882	2.79291	greenyellow	magenta	turquoise
DPM1	-2.10845	12.3599	0.0560336	-0.90295	0.0133631	1.64379	2.08858	cyan	yellow	purple
SCYL3	2.04018	8.93017	0.0719882	-0.0332771	0.637629	0.715051	0.412875	magenta	grey	green
C1orf112	-6.07315	11.6945	6.20329e-05	-2.01533	-0.948816	-0.614377	0.867694	blue	turquoise	brown
FGR	14.8519	13.937	6.16941e-10	7.23457	9.67797	2.72547	-5.7308	brown	blue	pink
CFH	11.7526	12.3584	4.52356e-08	3.0574	4.44354	6.88833	3.13786	brown	blue	sienna3
FUCA2	-4.65456	10.1824	0.000859364	-1.01429	-0.358653	2.36782	3.05429	cyan	yellow	brown
GCLC	2.17727	8.44445	0.0593692	-0.0290184	1.20148	2.22109	1.63486	greenyellow	orange	greenyellow
NFYA	-1.07538	13.6868	0.300796	-0.610245	0.203243	2.22593	2.42943	pink	turquoise	red
STPG1	5.54661	12.8623	9.81347e-05	0.642429	1.46361	1.1909	0.137884	tan	blue	greenyellow
NIPAL3	11.8131	13.8412	1.29402e-08	1.62335	2.34454	3.78396	1.80001	yellow	blue	green
LAS1L	-3.48535	11.4226	0.00482978	-0.866979	-0.197675	2.31358	2.8459	green	turquoise	brown
ENPP4	6.34807	12.053	3.60152e-05	1.42314	2.90948	3.25596	1.08965	greenyellow	magenta	yellow
SEMA3F	6.09711	13.9646	2.78649e-05	0.74299	1.54967	5.85718	4.71085	yellow	blue	white
ANKIB1	-1.2398	10.7008	0.241548	-0.26006	0.0730568	3.29217	3.38567	black	yellow	red
CYP51A1	-1.34325	13.8429	0.200798	-1.76145	0.40566	-1.33887	-0.660979	blue	turquoise	plum
KRIT1	2.59617	10.7306	0.0253122	0.0609336	0.753604	2.67407	2.2668	darkgreen	pink	black
RAD52	1.50262	11.9779	0.158835	-0.158809	0.864153	1.16394	0.811268	grey	purple	green
BAD	-1.90264	10.2334	0.0855766	-0.719849	0.055619	1.59484	1.92695	black	turquoise	tan
LAP3	4.47263	12.3796	0.000706678	0.461431	1.33225	4.27721	3.38037	yellow	blue	blue
CD99	-0.120113	12.2128	0.906347	-0.418271	0.374484	5.46589	5.48778	salmon	brown	blue
MAD1L1	-2.39721	7.65671	0.0447048	-0.929545	-0.0143896	2.18736	2.65932	green	turquoise	blue
LASP1	-0.884945	7.48054	0.403733	-0.500322	0.225242	5.41269	5.55023	blue	turquoise	mediumpurple2
SNX11	-0.973386	13.3229	0.347704	-0.418626	0.158123	1.38609	1.51634	turquoise	turquoise	lightpink4
M6PR	-2.12031	9.64247	0.0609966	-0.585127	0.0159824	3.09634	3.38091	turquoise	turquoise	grey60
KLHL13	11.41	11.5057	1.27219e-07	2.11241	3.11549	4.28194	1.66799	yellow	blue	floralwhite
CYP26B1	-0.616984	12.1085	0.548671	-2.78101	1.55262	-1.61264	-0.998444	black	turquoise	darkseagreen4
ICA1	4.28245	9.65089	0.00174071	0.304923	0.9732	2.8257	2.18664	yellow	grey60	tan
DBNDD1	-7.48256	10.188	1.89578e-05	-3.77563	-2.04631	-0.382017	2.52895	black	turquoise	saddlebrown
ALS2	-5.43354	12.837	0.000119588	-0.738111	-0.317757	2.95735	3.48528	blue	turquoise	turquoise
CASP10	9.05919	13.9841	3.15883e-07	1.06658	1.72836	4.22234	2.82487	brown	blue	blue
CFLAR	10.8249	11.6411	1.99748e-07	0.810491	1.22073	5.99231	4.9767	brown	blue	green
TFPI	3.31238	10.4289	0.00742314	0.347654	1.75258	7.22244	6.17232	darkgreen	magenta	tan
NDUFAF7	-1.62691	13.1314	0.127503	-0.58982	0.0827858	1.17003	1.42355	green	yellow	skyblue2
RBM5	0.585022	12.6726	0.568803	-0.165545	0.288057	4.25804	4.19679	red	purple	tan
SLC7A2	-3.06904	9.78359	0.0121557	-3.59152	-0.564879	0.989304	3.0675	blue	turquoise	floralwhite
ARF5	-1.90972	12.9714	0.0785325	-0.627631	0.038721	3.14216	3.43662	black	green	midnightblue
SARM1	9.40592	13.7554	2.29555e-07	1.47264	2.34449	1.33798	-0.570586	yellow	blue	blue
POLDIP2	-10.5816	13.9194	4.87937e-08	-0.921741	-0.610918	3.58609	4.35242	green	turquoise	purple
PLXND1	0.868684	13.5898	0.400101	-0.371502	0.874886	6.80231	6.55061	salmon	greenyellow	blue
AK2	-2.44785	12.7039	0.029716	-0.759187	-0.0464651	3.85671	4.25953	green	turquoise	magenta
FKBP4	-6.40735	13.448	1.97562e-05	-1.23546	-0.613985	3.1371	4.06183	turquoise	turquoise	turquoise
KDM1A	-8.97403	9.45183	6.27217e-06	-1.1346	-0.680394	4.35058	5.25808	green	green	darkgrey
RBM6	2.38169	11.278	0.0358765	0.0277539	0.678053	4.31343	3.96052	purple	purple	green
CAMKK1	10.4081	8.43528	4.22592e-06	1.86298	2.91135	2.63508	0.247914	brown	blue	black
RECQL	-2.94539	9.21178	0.0159473	-1.06574	-0.141659	2.80488	3.40858	cyan	yellow	turquoise
VPS50	1.04775	13.6425	0.312964	-0.171299	0.496933	2.0479	1.88509	grey60	pink	greenyellow
ARHGAP33	-1.14231	9.87713	0.280261	-0.878244	0.283601	-0.236612	0.0607098	green	salmon	brown
NDUFAB1	-7.65066	11.3604	8.22574e-06	-1.30632	-0.724371	2.32427	3.33961	blue	turquoise	magenta
PDK4	5.1206	11.2926	0.000306606	1.58881	3.97109	2.20101	-0.578938	salmon	blue	tan
SLC25A13	-2.80696	10.8176	0.0173123	-0.677073	-0.0812413	1.95034	2.3295	turquoise	yellow	cyan
ST7	0.185422	12.2925	0.855922	-0.299861	0.355808	1.79042	1.76245	pink	yellow	magenta
CDC27	-1.25267	8.84821	0.242418	-0.824673	0.237841	4.05824	4.35166	midnightblue	tan	brown
HCCS	-1.92702	9.65526	0.0838828	-1.02759	0.0769454	0.834585	1.30991	pink	tan	turquoise
DVL2	-3.78578	9.24409	0.00410713	-0.74233	-0.188408	2.41117	2.87654	lightcyan	turquoise	yellow
UPF1	-2.67452	7.67895	0.0292126	-0.694797	-0.0488872	4.07841	4.45025	turquoise	red	turquoise
SKAP2	-0.939033	9.06497	0.372059	-0.652461	0.269381	2.45433	2.64587	pink	lightcyan	black
SLC25A5	-8.32682	11.2923	3.7444e-06	-1.37547	-0.80178	3.6766	4.76522	turquoise	yellow	brown
MCUB	-5.53556	8.09011	0.000529066	-1.81006	-0.746929	1.41625	2.69474	turquoise	turquoise	cyan
HOXA11	0.964592	8.06183	0.362788	-0.344473	0.841022	1.14902	0.900745	magenta	midnightblue	darkseagreen4
POLR2J	-3.20798	8.10922	0.0122416	-1.18578	-0.195321	0.673975	1.36453	cyan	yellow	saddlebrown
DHX33	-2.40648	13.1788	0.0314674	-0.809619	-0.0441873	1.94152	2.36842	turquoise	turquoise	royalblue
THSD7A	-1.57707	10.3872	0.144721	-1.17765	0.19861	2.68435	3.17386	lightyellow	black	paleturquoise
LIG3	2.19116	12.7644	0.0476223	0.0035557	0.579345	3.02336	2.73191	red	grey	turquoise
RPAP3	-5.30874	13.8617	0.000114156	-1.07515	-0.455977	1.29674	2.06231	pink	yellow	turquoise
ACSM3	8.13623	13.066	1.79568e-06	1.33492	2.29943	3.62661	1.80943	brown	blue	salmon
REXO5	5.80958	13.9102	4.64429e-05	0.728058	1.58106	0.891442	-0.263115	purple	blue	salmon
CIAPIN1	-7.32452	10.8067	1.65057e-05	-1.26723	-0.680628	2.37669	3.35062	blue	turquoise	brown
SPPL2B	1.87548	9.40417	0.0920653	-0.074848	0.829683	2.90218	2.52476	darkorange	purple	lightyellow
FAM214B	-1.20396	8.98231	0.25937	-0.88025	0.268856	3.02413	3.32983	blue	turquoise	brown
COPZ2	10.7069	13.8485	4.42632e-08	1.56149	2.34479	1.57423	-0.37891	purple	blue	plum2
PRKAR2B	-6.69206	7.52412	0.000203033	-5.94814	-2.87425	-1.06116	3.35004	turquoise	turquoise	darkorange2
MSL3	-5.66295	7.88056	0.000500734	-1.1487	-0.482646	2.48258	3.29825	turquoise	turquoise	salmon
CREBBP	5.3755	12.1683	0.000158743	0.639114	1.50809	4.56845	3.49484	tan	greenyellow	green
GCFC2	-0.666294	10.599	0.519462	-0.57624	0.309378	1.46148	1.59491	green	tan	blue
WDR54	-4.06834	13.6225	0.00121372	-1.09482	-0.337662	1.57828	2.29452	green	turquoise	lightcyan
CROT	2.41762	10.9818	0.0341841	0.0546704	1.16804	0.806821	0.195464	magenta	brown	black
KMT2E	7.42598	11.2853	1.13762e-05	0.883967	1.62544	4.84822	3.59352	yellow	blue	black
RHBDD2	5.58391	12.7343	9.566e-05	0.383283	0.868689	3.16198	2.536	yellow	brown	lightcoral
SOX8	5.27207	8.61621	0.000591341	1.10138	2.77682	0.426983	-1.51211	yellow	blue	darkgrey
IBTK	-1.28726	12.7933	0.220805	-0.544592	0.138336	3.2214	3.42453	green	yellow	blue
ZNF195	-5.1126	10.3102	0.000413774	-1.41598	-0.558831	1.10424	2.09165	turquoise	turquoise	darkolivegreen
MYCBP2	2.53628	11.4887	0.0268701	0.0346137	0.471875	4.58923	4.33599	brown	brown	yellow
FBXL3	2.21847	12.2821	0.0460811	0.0121782	1.18336	2.78103	2.18326	greenyellow	pink	skyblue
PDK2	4.41864	13.9237	0.000590941	0.610531	1.76344	1.90008	0.713097	salmon	brown	tan
ITGA3	4.09403	12.8713	0.0012926	0.316217	1.02432	5.05605	4.38578	yellow	brown	greenyellow
ZFX	0.606959	13.1383	0.554223	-0.307498	0.548152	3.21934	3.09902	grey	orange	darkslateblue
LAMP2	-0.669783	7.73347	0.522487	-0.780227	0.430637	4.28691	4.46171	grey60	lightcyan	ivory
GDE1	-1.613	7.12263	0.150043	-0.853068	0.159765	3.04292	3.38957	pink	yellow	yellow
OSBPL7	-1.40635	9.52588	0.191394	-0.87657	0.201012	2.21586	2.55364	green	red	darkmagenta
TMEM98	1.78692	9.82706	0.104779	-0.0932494	0.839546	3.68744	3.31429	royalblue	brown	paleturquoise
MAP3K14	7.18605	7.85083	0.000102896	0.986929	1.92421	2.2287	0.773131	purple	blue	floralwhite
TMEM132A	-6.93265	13.6887	7.84428e-06	-2.09962	-1.10582	3.08381	4.68653	black	green	paleturquoise
AP2B1	1.51902	13.2054	0.152333	-0.117699	0.678208	5.37044	5.09019	tan	salmon	blue
ZNF263	1.06774	9.03137	0.313347	-0.159123	0.443901	2.78898	2.64659	red	black	red
CX3CL1	8.16851	8.37546	2.87532e-05	4.51272	8.02464	1.45027	-4.81841	yellow	blue	plum2
SPATA20	0.202801	13.7748	0.842255	-0.325041	0.392814	3.67187	3.63798	red	black	honeydew1
TNFRSF12A	-3.3419	13.9051	0.00488148	-1.91479	-0.417194	2.35736	3.52335	green	turquoise	royalblue
RALA	-14.5813	13.9521	7.74423e-10	-3.24822	-2.41495	1.72945	4.56103	turquoise	turquoise	salmon
BAIAP2L1	1.62414	11.7293	0.130895	-0.138739	0.943122	-0.554569	-0.95676	red	grey	pink
KDM7A	9.6113	11.5793	7.31039e-07	1.60821	2.55604	3.64262	1.56049	brown	blue	yellow
ETV1	-5.66502	7.36171	0.00063777	-5.01388	-2.08147	-1.92586	1.62181	turquoise	turquoise	lightcyan
AGK	-5.27047	11.5372	0.00022534	-0.880601	-0.363847	2.21428	2.8365	green	turquoise	brown
PHTF2	0.406327	13.9586	0.690663	-0.28831	0.423036	1.64341	1.57605	midnightblue	tan	royalblue
FARP2	-1.33356	13.9952	0.203647	-0.364775	0.0850788	2.96496	3.10481	green	turquoise	blue
GGCT	-4.17118	13.8186	0.000967311	-1.05616	-0.338272	0.54353	1.24075	turquoise	turquoise	brown
DBF4	-8.55334	10.7281	4.07715e-06	-3.79758	-2.23932	-1.41321	1.60524	midnightblue	yellow	magenta
IFRD1	0.855183	11.0458	0.410616	-0.230293	0.523211	2.62565	2.47919	green	yellow	green
COX10	-1.103	12.53	0.290761	-0.453717	0.147784	1.00059	1.15356	blue	turquoise	purple
GTF2IRD1	1.25092	9.43044	0.241106	-0.192466	0.67612	1.61213	1.37031	magenta	purple	yellow
PAF1	0.668108	11.415	0.517346	-0.22022	0.413411	3.03757	2.94098	lightcyan	red	turquoise
VPS41	2.76223	12.4043	0.0167593	0.0549513	0.458485	3.78565	3.52893	salmon	cyan	lightyellow
ARHGAP44	15.3228	11.3718	6.02983e-09	3.64265	4.85898	2.18617	-2.06465	brown	blue	ivory
ELAC2	-6.79141	13.9478	8.8877e-06	-1.10693	-0.575438	3.20302	4.0442	lightcyan	turquoise	darkolivegreen
ARSD	2.37076	13.9832	0.0326641	0.0474282	0.948826	2.38593	1.88781	salmon	cyan	blue
PNPLA4	0.750936	11.9893	0.467175	-0.340621	0.69884	0.138081	-0.0410279	black	yellow	honeydew1
ADIPOR2	2.15146	13.9907	0.0493953	0.000680691	0.447459	3.19603	2.97196	pink	salmon	turquoise
MARK4	0.878254	13.2195	0.395489	-0.230669	0.547588	2.79053	2.63207	magenta	purple	darkorange
CCDC124	-2.68963	11.7359	0.0200171	-0.974943	-0.10109	1.56659	2.1046	pink	turquoise	purple
PAFAH1B1	2.04184	13.7952	0.0607725	-0.00949323	0.375431	4.52218	4.33921	darkgreen	pink	blue
KIAA0100	-3.44831	12.6068	0.00450516	-0.665856	-0.151901	5.11463	5.52351	turquoise	turquoise	green
TRAPPC6A	2.9888	13.1771	0.0103293	0.204171	1.26382	0.36886	-0.365134	salmon	cyan	tan
CD79B	7.22092	10.7089	1.97461e-05	2.31985	4.36387	0.384326	-2.95753	brown	blue	pink
ST7L	5.24586	11.7402	0.000221227	0.257195	0.624155	1.32236	0.881685	red	blue	green
RPUSD1	-8.08965	12.5704	2.47283e-06	-1.86721	-1.07795	1.62732	3.0999	turquoise	turquoise	turquoise
RHBDF1	-0.854157	7.58323	0.419181	-0.586327	0.271587	3.41471	3.57208	darkturquoise	red	magenta
LUC7L	0.863149	8.70385	0.411208	-0.206662	0.459542	3.32612	3.19968	purple	purple	turquoise
BAIAP3	-3.31415	8.70488	0.00944848	-3.35799	-0.625111	-3.35632	-1.36477	turquoise	turquoise	salmon
TSR3	-4.21564	8.39314	0.00263434	-1.21397	-0.359973	1.74449	2.53146	black	red	darkgrey
PIGQ	-3.36888	8.25267	0.00936845	-0.984694	-0.186953	2.40131	2.98713	turquoise	red	darkred
CRAMP1	0.914992	9.09824	0.383805	-0.2819	0.665892	1.59206	1.40006	magenta	purple	yellow
TEAD3	8.45331	13.9702	7.27931e-07	1.98736	3.33906	1.00723	-1.65598	yellow	blue	yellow
SELE	8.98624	13.1525	5.60228e-07	3.3964	5.54297	2.44483	-2.02486	brown	blue	red
DNAJC11	-4.70581	9.83625	0.000872478	-1.3617	-0.485226	2.02266	2.94612	turquoise	turquoise	turquoise
MYLIP	21.9943	13.0291	1.0965e-11	2.30403	2.80582	3.69939	1.14446	yellow	blue	midnightblue
E2F2	-0.988151	7.552	0.353676	-3.64909	1.4757	-0.710567	0.376129	green	lightgreen	brown
PSMB1	-4.67131	8.8427	0.00122299	-1.28269	-0.444161	3.46978	4.3332	blue	turquoise	brown
JARID2	1.81742	11.4282	0.095444	-0.0823204	0.883356	2.18747	1.78695	salmon	brown	orange
CDKL5	7.01913	13.1308	8.59858e-06	1.00352	1.89461	2.09461	0.645543	yellow	grey60	yellow
NADK	4.39879	7.42244	0.00274493	0.200698	0.655927	4.03204	3.60372	yellow	brown	greenyellow
CYTH3	7.31359	9.78358	2.88206e-05	0.604866	1.13719	1.99366	1.12263	salmon	blue	skyblue
SYPL1	0.935984	11.5126	0.3685	-0.363941	0.907621	3.02836	2.75652	greenyellow	pink	pink
CYB561	1.58817	11.9517	0.138336	-0.0921568	0.586937	3.58882	3.34143	red	grey	salmon
SPAG9	6.35767	10.1084	7.88101e-05	0.491084	1.01984	5.08281	4.32735	brown	blue	pink
AASS	2.9371	7.9618	0.0188912	0.15656	1.30515	3.29663	2.56578	purple	cyan	paleturquoise
SS18L2	-2.89136	11.3065	0.0142991	-1.48238	-0.203372	-0.234981	0.607896	cyan	yellow	thistle2
MPND	0.761012	13.751	0.459502	-0.283635	0.594787	-0.450432	-0.606008	magenta	black	tan
MGST1	-6.46475	10.6588	5.37782e-05	-4.99437	-2.44995	-1.61326	2.1089	turquoise	turquoise	brown
CRY1	1.78605	7.86988	0.112532	-0.118956	0.925864	2.70077	2.29732	greenyellow	grey	turquoise
NFIX	8.40101	12.2519	1.96873e-06	1.72885	2.93591	4.1826	1.85022	yellow	blue	skyblue1
ST3GAL1	6.06458	11.7077	6.25337e-05	0.538919	1.1459	5.07068	4.22827	brown	blue	bisque4
MMP25	5.3198	9.92727	0.000346254	2.12468	5.1924	0.543235	-3.11531	brown	brown	blue
IL32	-0.143602	13.6622	0.887911	-0.911394	0.797258	1.70754	1.76461	black	green	blue
PKD1	4.38654	8.57245	0.00197186	0.482795	1.52739	4.39624	3.39115	purple	brown	blue
MED24	-2.53436	10.1581	0.0293222	-0.675515	-0.0441435	3.65052	4.01034	green	turquoise	brown
RHOBTB2	2.25294	13.528	0.0414389	0.0115165	0.501721	2.31198	2.05536	grey	greenyellow	yellow
HEATR5B	5.39521	13.8748	9.74128e-05	0.249547	0.579338	3.52669	3.11224	purple	brown	grey60
SEC62	4.30405	9.89668	0.00158904	0.518264	1.63407	4.26188	3.18571	greenyellow	magenta	turquoise
RPS20	1.01147	7.63095	0.342786	-0.232789	0.591146	5.40516	5.22598	red	lightyellow	blue
CSDE1	0.988284	9.09238	0.348582	-0.130675	0.333991	6.78644	6.68479	red	blue	lightgreen
UBE3C	-9.04524	12.3711	8.31757e-07	-0.878992	-0.538645	4.12587	4.83469	lightcyan	turquoise	turquoise
REV3L	2.21535	11.9564	0.0469055	0.00567293	0.699277	3.46658	3.11411	greenyellow	blue	yellow
FAM76A	1.69165	9.48222	0.123251	-0.123982	0.882382	0.761361	0.382161	grey	pink	greenyellow
POMT2	-5.64241	7.6597	0.000567558	-1.21379	-0.505612	1.7265	2.5862	turquoise	red	turquoise
VTA1	-1.84668	7.64313	0.103727	-1.0109	0.115884	2.22924	2.67675	cyan	yellow	plum1
BAZ1B	-3.91613	13.4293	0.00167092	-0.520272	-0.151102	4.23429	4.56998	blue	turquoise	darkturquoise
RANBP9	4.1587	7.58377	0.00356447	0.265418	0.9406	3.29757	2.69457	greenyellow	blue	yellow
SPRTN	-1.79746	10.8257	0.100179	-0.790807	0.0805787	1.05208	1.40719	pink	yellow	purple
METTL13	-1.39634	8.72944	0.197097	-0.677327	0.161808	2.20277	2.46053	turquoise	turquoise	grey60
DYRK4	-2.06596	9.71387	0.0665444	-0.826274	0.0328566	1.50614	1.90285	blue	turquoise	cyan
ZNF207	-2.51221	9.32281	0.0323559	-0.673755	-0.0370563	4.69106	5.04646	green	tan	blue
UQCRC1	-10.1565	9.35891	2.32524e-06	-1.58047	-1.00742	3.39277	4.68672	blue	turquoise	purple
STARD3NL	-7.74818	8.00106	5.48934e-05	-1.62049	-0.877157	2.22345	3.47227	turquoise	yellow	royalblue
CD9	-1.62059	9.73515	0.137003	-1.0771	0.171966	5.58258	6.03515	midnightblue	yellow	darkolivegreen
NCAPD2	-14.7047	11.2693	1.05202e-08	-2.28259	-1.68974	2.65625	4.64241	blue	turquoise	brown
IFFO1	-1.01389	8.92679	0.337327	-0.593955	0.226632	2.15949	2.34315	black	black	blue
PHF7	1.05331	10.2363	0.316428	-0.203294	0.569994	-0.47636	-0.65971	red	grey60	lightcyan
SEMA3G	-10.0928	11.8023	3.73441e-07	-8.09849	-5.21833	-4.43905	2.21937	turquoise	green	blue
NISCH	-0.240323	12.6827	0.813921	-0.538995	0.431329	4.75009	4.80392	darkorange	black	blue
STAB1	0.830606	8.16236	0.42982	-0.327102	0.697397	7.14493	6.95978	red	black	blue
FUZ	1.22041	13.0155	0.24396	-0.194642	0.700217	0.979494	0.726706	royalblue	purple	yellow
IDS	5.20458	10.5285	0.000337216	0.578496	1.43442	3.42162	2.41516	yellow	brown	lightcyan
PRSS3	-13.6428	10.2062	6.97441e-08	-7.19917	-5.18252	-4.91827	1.27257	turquoise	green	pink
ZNF200	-3.21188	11.4643	0.0078785	-1.04741	-0.198104	0.37966	1.00242	turquoise	turquoise	blue
LRRC23	0.655	7.72947	0.531472	-0.831852	1.48629	-1.13798	-1.4652	black	black	skyblue1
HFE	9.81359	10.5285	1.26353e-06	1.23471	1.95373	0.932166	-0.662055	brown	blue	cyan
SCMH1	6.57056	13.8751	1.30446e-05	0.369911	0.728888	2.95823	2.40883	brown	blue	yellow
FYN	-5.88038	12.7654	5.82221e-05	-0.9304	-0.429761	3.48258	4.16266	black	green	salmon
HIVEP2	11.9716	13.2457	1.75999e-08	2.60536	3.7501	4.62972	1.45199	yellow	blue	yellow
ELOA	-4.96278	13.9402	0.000211078	-0.577016	-0.228676	3.09372	3.49656	turquoise	turquoise	red
LYPLA2	-9.40473	9.10495	5.48055e-06	-1.75454	-1.07511	2.6828	4.09762	lightcyan	green	steelblue
CLCN6	-1.19759	13.8142	0.251223	-0.7094	0.201449	1.93763	2.19161	black	midnightblue	orange
MRC2	0.66113	10.9872	0.522151	-0.48309	0.897832	4.29545	4.08808	salmon	cyan	tan
TSPAN9	9.74822	11.608	6.1849e-07	1.50805	2.38043	5.37143	3.42719	yellow	blue	blue
BTBD7	6.73156	11.4036	2.70709e-05	0.595595	1.17059	4.09694	3.21385	tan	blue	green
APBA3	-0.592323	10.7954	0.565834	-0.563892	0.32518	1.57406	1.69341	black	red	yellow
MKS1	0.00922816	13.258	0.992775	-0.24759	0.249718	0.8332	0.832136	green	green	blue
ABHD5	0.46145	8.54864	0.655991	-0.393403	0.592997	2.22722	2.12742	green	lightcyan	plum1
ANOS1	6.43832	8.05101	0.000195334	2.72044	5.75146	2.55746	-1.67849	brown	blue	yellow4
AKAP8L	-1.43438	12.4714	0.176061	-0.538255	0.109819	2.71533	2.92955	black	black	green
MBTD1	3.15107	13.7553	0.00720863	0.213605	1.12894	2.06486	1.39359	salmon	brown	tan
UTP18	-4.50416	13.9995	0.000495277	-1.13805	-0.403833	1.67435	2.44529	blue	turquoise	brown
RNF216	1.0354	8.40567	0.329348	-0.126928	0.336971	3.89796	3.79294	red	purple	red
TTC19	7.90583	12.3605	3.51686e-06	0.530735	0.93277	3.45263	2.72088	brown	blue	pink
PTBP1	-7.84651	13.1431	2.57604e-06	-1.17128	-0.665987	4.88152	5.80015	blue	turquoise	brown
DPF1	-4.32202	7.52238	0.00293319	-4.2897	-1.28314	-3.79815	-1.01173	turquoise	turquoise	palevioletred3
LARS2	-6.78889	13.7958	9.44603e-06	-1.07817	-0.559933	1.8955	2.71456	blue	turquoise	brown
PIK3C2A	2.69374	13.072	0.0183389	0.104814	0.951487	5.12638	4.59823	purple	pink	greenyellow
PLAUR	-3.2937	8.61938	0.00988841	-2.21341	-0.403743	2.51498	3.82356	blue	turquoise	purple
ANLN	-12.7902	10.6118	8.75383e-08	-5.3583	-3.7789	0.165748	4.73435	blue	turquoise	brown
WIZ	-0.568975	13.8412	0.578489	-0.427749	0.248535	3.31786	3.40747	magenta	midnightblue	yellow
RABGAP1	8.57488	12.638	1.27082e-06	0.876497	1.4692	4.1348	2.96195	yellow	blue	yellow
DCN	20.191	12.2197	9.32835e-11	8.36713	10.3868	7.69422	-1.68277	brown	blue	blue
QPCTL	-4.66217	10.5811	0.000766593	-1.45799	-0.519772	0.590415	1.5793	turquoise	turquoise	turquoise
PPP5C	-6.1266	11.8646	5.38229e-05	-0.997407	-0.473606	3.12051	3.85602	blue	turquoise	white
CEP68	3.52078	13.9471	0.00340992	0.27205	1.12092	3.66815	2.97167	yellow	brown	blue
MAP4K3	1.39833	13.8171	0.184056	-0.123038	0.582369	2.35801	2.12834	magenta	magenta	yellow
TMEM159	4.60002	13.8702	0.000422252	0.404649	1.11278	2.23088	1.47217	salmon	brown	darkred
BRCA1	-9.1298	13.6583	3.46957e-07	-2.8133	-1.7409	0.188806	2.46591	blue	turquoise	brown
ERCC1	-5.31757	13.8309	0.0001132	-0.815847	-0.346492	3.08712	3.66829	green	turquoise	salmon
MBTPS2	2.12876	12.0316	0.0546169	-0.0108026	0.941519	1.59511	1.12975	tan	darkred	brown
PRICKLE3	1.8725	13.2032	0.0834489	-0.049838	0.705896	0.0813381	-0.246691	magenta	salmon	lightcyan1
EXTL3	-5.43468	11.0942	0.000199484	-0.963459	-0.408433	3.80403	4.48998	turquoise	green	salmon
ELOVL5	-1.95324	10.3932	0.0782264	-0.487506	0.0308076	4.02822	4.25657	cyan	yellow	brown
CALCOCO1	7.01201	10.9528	2.28527e-05	0.957936	1.8351	5.1058	3.70928	orange	brown	darkorange
UBR7	-0.430676	11.7375	0.674506	-0.260683	0.174814	2.34164	2.38458	blue	yellow	greenyellow
MAP4K5	-2.11912	8.6688	0.0642834	-0.79027	0.0281036	3.13467	3.51575	pink	yellow	turquoise
EHD3	4.60934	13.8223	0.00041853	0.514285	1.41143	2.2324	1.26954	salmon	brown	midnightblue
PSMC4	-4.60681	11.2569	0.000712439	-1.27523	-0.452209	3.27484	4.13857	green	turquoise	magenta
MAN2B2	9.74529	13.0715	2.315e-07	0.902117	1.41564	4.0222	2.86332	yellow	brown	mediumpurple3
CLDN11	-10.0254	9.61547	2.11125e-06	-6.02817	-3.82613	-0.260541	4.66661	blue	turquoise	skyblue3
SLC25A39	0.361034	7.36285	0.728212	-1.13414	1.54771	4.29904	4.09226	darkred	lightgreen	darkorange
MVP	-2.47646	9.92939	0.0328962	-0.96761	-0.0506085	4.60927	5.11838	green	green	brown
NUB1	4.39458	9.55719	0.00150081	0.165966	0.511753	3.19728	2.85842	salmon	blue	darkorange
PGM3	-4.59069	10.9115	0.000793032	-1.1607	-0.407898	2.78286	3.56716	cyan	yellow	red
RWDD2A	-0.685111	13.9513	0.504499	-0.552648	0.285125	0.24088	0.374642	lightyellow	black	red
CLK1	2.94409	11.7005	0.0125764	0.179665	1.214	4.05279	3.35595	purple	brown	green
POLR3B	-3.13664	13.3243	0.00766843	-0.999369	-0.185382	1.26464	1.85702	blue	turquoise	darkolivegreen
ANGEL1	7.44974	13.8482	3.31759e-06	0.69917	1.26534	3.19759	2.21534	yellow	brown	black
RNF14	-0.661793	7.9822	0.526743	-0.856163	0.474444	2.75044	2.9413	darkred	lightgreen	turquoise
DNASE1L1	5.93131	13.9922	3.67243e-05	0.634917	1.35424	3.82921	2.83463	tan	blue	greenyellow
DDX11	-3.27959	9.64921	0.00869201	-2.30052	-0.433705	0.0171444	1.38426	green	turquoise	lightsteelblue1
HEBP1	0.831335	13.7291	0.420009	-0.418549	0.946781	0.961982	0.697866	tan	salmon	green
GPRC5A	2.18712	9.6802	0.0544616	-0.0257102	2.22943	3.16794	2.06608	red	grey	greenyellow
MAMLD1	7.06528	9.19622	5.27829e-05	1.50972	2.92504	1.71585	-0.501528	yellow	blue	lightgreen
TACC3	-6.13116	9.98558	0.000111717	-2.96372	-1.38356	1.13233	3.30597	blue	turquoise	brown
UFL1	2.43289	10.7709	0.0336697	0.0374371	0.767946	2.6823	2.27961	brown	pink	blue
POLA2	-9.55701	11.3619	9.00607e-07	-2.13623	-1.33898	0.734135	2.47174	blue	turquoise	purple
ZC3H3	2.84793	12.927	0.0137759	0.116554	0.850735	1.82231	1.33866	tan	greenyellow	salmon
CAPN1	-13.6405	10.6405	4.45077e-08	-1.49068	-1.07498	4.09093	5.37376	blue	turquoise	brown
MDH1	-7.32446	11.1032	1.41988e-05	-1.53361	-0.825506	2.5752	3.75476	blue	turquoise	darkolivegreen
SLC30A9	-0.552289	10.0928	0.592769	-0.483434	0.291189	3.19177	3.2879	darkgrey	lightcyan	lightcyan
MTMR11	7.06075	10.1559	3.18751e-05	1.19621	2.29591	2.18853	0.442474	brown	brown	pink
COX15	-1.84977	10.631	0.0923127	-0.34895	0.0309895	2.65708	2.81606	green	turquoise	pink
CCDC88C	1.29314	13.8771	0.217077	-0.170959	0.689041	3.48702	3.22798	salmon	purple	blue
YAF2	4.69117	12.0983	0.000510888	0.263006	0.718416	1.1562	0.665485	greenyellow	blue	green
ZMYND11	6.63169	9.84483	6.29038e-05	0.362836	0.7312	4.03811	3.49109	yellow	blue	black
BID	-6.77067	7.65893	0.000173457	-2.42675	-1.18651	1.1553	2.96193	turquoise	turquoise	magenta
MATR3	1.14683	13.9671	0.270718	-0.244074	0.804778	0.375226	0.0948741	red	midnightblue	turquoise
XYLT2	-2.67317	10.8459	0.0219093	-0.740126	-0.0710633	2.63691	3.0425	green	red	midnightblue
NUDCD3	-3.23833	9.02887	0.0101434	-0.46407	-0.0824678	4.13473	4.408	red	red	blue
GLT8D1	0.867065	9.031	0.408353	-0.140517	0.315332	3.06151	2.97411	grey60	lightcyan	bisque4
ATP2C1	1.72322	13.4362	0.10777	-0.0421027	0.379524	3.76427	3.59556	pink	pink	turquoise
SLC38A5	-5.37975	8.34556	0.000574145	-7.1061	-2.86335	-3.30327	1.68146	turquoise	turquoise	orangered4
RALBP1	-0.888634	8.43499	0.398832	-0.430281	0.189354	3.69192	3.81238	black	green	grey
RUFY3	3.30325	13.7662	0.00533324	0.159861	0.754497	2.73078	2.2736	orange	brown	skyblue2
CNTN1	8.78727	13.5125	5.90625e-07	5.47573	9.02774	1.33237	-5.91936	brown	blue	blue
WWTR1	7.01103	11.4991	1.77123e-05	0.926991	1.76884	6.55891	5.211	yellow	blue	darkseagreen4
AGPS	-5.77068	13.006	6.4713e-05	-1.54208	-0.702003	2.74353	3.86557	cyan	yellow	yellowgreen
CXorf56	-0.194213	10.0285	0.849887	-0.33221	0.278921	1.40573	1.43237	green	turquoise	orangered3
TTC27	-4.08222	13.9264	0.00113193	-0.708264	-0.220206	1.81467	2.2789	green	turquoise	brown
ZNF582	6.39611	12.7386	2.59245e-05	0.90345	1.82794	-0.189923	-1.55562	yellow	blue	skyblue
VSIG2	-1.62314	7.76084	0.144379	-1.57712	0.278206	-0.862504	-0.213046	green	turquoise	yellowgreen
PHLDB1	-0.897022	7.91357	0.396175	-0.778657	0.343121	4.74879	4.96656	green	red	magenta
PRDM11	10.4938	10.1753	8.82912e-07	1.63348	2.51153	2.99805	0.925546	yellow	blue	green
CD74	22.7007	11.6204	5.48611e-11	8.42167	10.2171	5.25759	-4.06181	brown	blue	grey60
ZRANB1	3.68457	8.46786	0.00559733	0.228147	0.972264	2.41274	1.81254	magenta	brown	yellow
NCDN	-2.62547	10.9945	0.0236058	-0.804344	-0.0707177	2.09084	2.52837	turquoise	red	turquoise
ADGRA2	15.7188	13.9969	2.74413e-10	2.7903	3.67209	6.87956	3.64836	yellow	blue	black
ZFP64	-8.0605	11.8247	3.82862e-06	-2.13046	-1.22261	0.81392	2.49046	turquoise	green	yellowgreen
MNAT1	-5.1558	13.9917	0.00014621	-1.08408	-0.447086	1.17936	1.94494	blue	turquoise	steelblue
SAMD4A	4.24628	9.93493	0.00172452	0.447456	1.43734	4.58009	3.63769	brown	blue	red
MRE11	0.87077	13.1272	0.399524	-0.215809	0.50773	2.06198	1.91602	green	pink	cyan
SERPINB1	6.51272	11.2001	3.99732e-05	1.24617	2.51424	4.05036	2.17016	brown	blue	cyan
SPAST	0.917359	13.5678	0.374974	-0.173244	0.430854	2.57583	2.44702	magenta	lightcyan	black
NRXN3	-2.43342	12.302	0.0310871	-3.82334	-0.216239	-4.06703	-2.04724	black	green	skyblue3
OSBPL5	4.98545	13.7574	0.000210507	0.374087	0.940625	3.17336	2.516	yellow	brown	black
AQR	-1.55307	12.8367	0.144705	-0.434997	0.0714138	3.77339	3.95518	green	tan	brown
FHL1	10.0337	11.2325	6.01506e-07	1.55803	2.43081	4.85484	2.86042	brown	blue	salmon4
NLRP2	-0.858391	13.3434	0.405833	-2.5696	1.10552	-1.34649	-0.614455	turquoise	turquoise	plum
SLC45A4	1.305	13.8809	0.213112	-0.379526	1.55665	0.697872	0.109312	royalblue	brown	mediumpurple2
RNF10	0.868828	7.47837	0.411955	-0.513654	1.12271	5.13799	4.83347	darkred	lightgreen	purple
ZNF839	-0.183918	11.1927	0.857367	-0.328511	0.277745	0.639814	0.665197	black	black	blue
ZDHHC6	-2.23351	9.59942	0.0506141	-0.46604	0.000760444	2.61281	2.84545	green	yellow	turquoise
GRAMD1B	11.744	13.3148	2.10495e-08	2.84547	4.12457	3.76481	0.279796	yellow	blue	yellow
RNH1	-0.925456	10.377	0.375749	-0.420374	0.17279	4.65535	4.77915	green	turquoise	darkgreen
NDUFS1	-4.22997	11.2981	0.00133201	-0.789451	-0.250216	4.0678	4.58763	green	turquoise	turquoise
RB1CC1	0.135614	13.3848	0.894145	-0.315399	0.35778	3.79085	3.76966	grey60	magenta	darkorange
ERP44	5.11828	8.36493	0.000791317	0.478321	1.25204	3.77433	2.90914	greenyellow	magenta	lightgreen
ALAS1	-7.29492	10.7144	1.79562e-05	-1.10924	-0.59375	2.74563	3.59713	turquoise	turquoise	turquoise
BIRC3	9.11544	13.6204	3.6135e-07	3.71642	6.01127	1.85843	-3.00541	brown	blue	turquoise
AKAP11	7.32286	12.9361	5.97521e-06	0.746989	1.37263	4.33211	3.2723	darkgreen	blue	yellow
GLRX2	-0.761745	13.9063	0.458937	-0.919446	0.437733	0.688792	0.929649	midnightblue	yellow	grey60
SNAPC1	-1.90142	12.778	0.0800339	-1.19776	0.0774142	0.494616	1.05479	cyan	yellow	turquoise
DERA	-5.47484	9.30797	0.000349117	-1.49618	-0.624381	1.52533	2.58561	blue	turquoise	blue
STRAP	-7.10883	13.6086	6.16577e-06	-1.14275	-0.611923	3.31328	4.19062	cyan	yellow	brown
ABCC2	1.20059	13.7294	0.250217	-0.301703	1.06574	-0.999624	-1.38164	skyblue	purple	orange
PLEKHO1	0.00362789	10.0389	0.997176	-0.497492	0.499116	3.61193	3.61111	black	black	yellowgreen
GCLM	-7.09852	12.5724	9.69633e-06	-2.34594	-1.24828	1.13275	2.92986	turquoise	turquoise	orangered4
UBR2	4.469	8.67435	0.00170611	0.420511	1.29272	4.15361	3.29699	brown	orange	black
EHD2	0.568178	12.3238	0.58012	-0.3665	0.626099	5.33015	5.20035	tan	greenyellow	pink
DEPDC1	-8.00456	8.85846	2.4185e-05	-6.8906	-3.84829	-3.65131	1.71813	blue	turquoise	brown
CCDC28A	2.51407	12.733	0.0262205	0.0839081	1.12468	0.597585	-0.00670855	salmon	grey60	black
HSF2	-2.96776	13.1158	0.0108045	-0.603507	-0.0952826	0.640107	0.989502	turquoise	turquoise	yellow
PHF20	2.88514	12.6773	0.0130488	0.0619105	0.434831	3.34302	3.09465	salmon	brown	black
NR1H3	8.98536	13.5434	4.47404e-07	1.66567	2.71452	1.56245	-0.627643	brown	blue	navajowhite2
TYMP	3.80443	8.25249	0.00491274	0.718031	2.89856	1.72155	-0.0867472	purple	blue	plum1
NCAPH2	-3.9535	13.5953	0.00152059	-0.963376	-0.284503	1.89806	2.522	green	turquoise	brown
TOMM34	-9.94792	12.299	3.07685e-07	-1.97594	-1.26747	1.79955	3.42125	blue	turquoise	brown
SEC63	4.69469	12.7382	0.00044253	0.584453	1.58475	2.94363	1.85903	tan	greenyellow	steelblue
KPNA6	-4.14826	10.371	0.00183692	-0.693113	-0.210241	4.50243	4.9541	green	yellow	turquoise
VIM	-1.59312	12.9234	0.135287	-0.34582	0.0523638	8.54385	8.69058	magenta	grey	blue
FAS	5.70782	13.3189	6.55688e-05	0.972188	2.15167	1.21364	-0.348293	yellow	brown	pink
RNASET2	6.90636	10.7716	2.85674e-05	1.8244	3.53766	1.46105	-1.21998	yellow	brown	skyblue3
CD44	-1.6851	13.7568	0.114508	-2.78759	0.336861	1.73418	2.95954	grey	green	skyblue3
AGPAT4	5.48527	13.8721	8.30021e-05	0.519904	1.18847	2.84558	1.99139	yellow	brown	green
BTN3A1	9.15331	9.95444	3.67189e-06	1.13951	1.87338	2.54935	1.04291	brown	brown	black
MIPEP	-10.811	13.9474	3.65934e-08	-1.21251	-0.810937	0.318502	1.33023	turquoise	turquoise	darkorange2
PRKCH	3.5238	9.65165	0.00581091	0.144474	0.648076	4.77549	4.37922	greenyellow	brown	green
IFNGR1	5.29268	9.47008	0.000421104	0.868476	2.14811	3.89933	2.39103	yellow	blue	blue
B4GALT7	-3.94463	12.0918	0.00191905	-0.711902	-0.205566	2.37197	2.83071	lightcyan	green	red
VRK2	-6.79339	11.6189	2.26254e-05	-1.33538	-0.685021	1.07967	2.08987	turquoise	turquoise	brown
TNFRSF1B	8.19569	13.8847	1.0931e-06	1.10685	1.89234	5.1503	3.65071	brown	blue	blue
VEZT	-1.39928	8.13749	0.198674	-0.540917	0.131621	3.84349	4.04814	midnightblue	yellow	turquoise
POU2F2	-1.76579	9.98334	0.107938	-2.49831	0.289494	-1.88775	-0.783338	black	green	lightcyan
BRD9	-3.0696	8.14647	0.015027	-0.965604	-0.138641	2.68073	3.23285	green	red	brown
SNX1	4.96235	13.8829	0.00021383	0.62225	1.57091	4.12076	3.02418	tan	greenyellow	black
TBPL1	-1.44667	10.2795	0.177785	-0.998383	0.210557	0.901379	1.29529	cyan	yellow	turquoise
ARNTL2	-5.36072	7.80358	0.000735475	-2.60169	-1.03181	1.77586	3.5926	blue	turquoise	brown
BCLAF1	0.777138	11.0299	0.453422	-0.354008	0.740642	4.24859	4.05527	red	pink	green
SLC39A9	3.3207	12.0033	0.00610009	0.13538	0.651965	4.33054	3.93687	red	magenta	darkgreen
ANK1	2.10752	8.93199	0.0645599	-0.172772	4.80333	-0.0931362	-2.40842	darkred	orange	pink
TFB1M	-6.72914	13.9949	9.65693e-06	-2.01616	-1.04154	-0.976499	0.552353	turquoise	turquoise	turquoise
RABEP1	-3.43065	13.5297	0.00424201	-0.428491	-0.0981605	3.40637	3.66969	pink	turquoise	indianred4
HMGB3	-10.3529	12.657	1.52991e-07	-2.62755	-1.71821	0.683017	2.8559	blue	turquoise	brown
NUP160	7.47332	11.4882	9.66138e-06	1.01651	1.85901	3.84576	2.408	brown	blue	darkturquoise
BAK1	-5.94923	11.514	7.96606e-05	-1.83502	-0.847842	-0.390406	0.951022	turquoise	turquoise	brown
IKZF2	12.4366	13.9528	6.13704e-09	3.07756	4.36076	0.796611	-2.92255	brown	blue	blue
GRN	2.71505	13.8861	0.0168529	0.123542	1.05625	6.21354	5.62364	salmon	brown	lightyellow
FAM13B	8.54616	10.1871	5.81357e-06	1.11635	1.9011	2.58505	1.07632	greenyellow	blue	sienna3
ARHGAP31	7.06177	11.9435	1.3497e-05	0.459803	0.870451	5.51289	4.84776	yellow	blue	greenyellow
CENPQ	-1.26283	12.5512	0.229609	-1.20122	0.316988	-0.973576	-0.531459	midnightblue	yellow	blue
SARS	-3.21979	11.6215	0.00764115	-0.80832	-0.154455	4.45733	4.93872	green	turquoise	grey60
RANBP3	-1.2783	8.71622	0.234133	-0.568791	0.159366	2.89727	3.10198	pink	red	turquoise
ARID4A	5.50632	13.3238	9.24723e-05	0.706665	1.61551	2.43723	1.27615	tan	blue	salmon4
PNPLA6	-3.89756	12.9167	0.00185582	-1.02475	-0.293553	3.93353	4.59268	black	green	green
IFT88	1.0204	10.5605	0.330348	-0.378248	1.02594	1.01015	0.686302	grey60	pink	cyan
ALG1	-2.81846	12.1755	0.0153156	-1.02389	-0.131861	1.04622	1.6241	turquoise	turquoise	grey60
ZCCHC8	4.14243	12.0223	0.00135965	0.176603	0.568346	2.18866	1.81619	red	magenta	grey60
ABCF2	-6.56455	11.6362	3.09889e-05	-1.30968	-0.655245	1.59548	2.57795	black	turquoise	grey60
CHPF2	-3.70547	8.84946	0.00502401	-1.03678	-0.249486	4.04378	4.68691	turquoise	red	red
FUT8	0.418982	13.8943	0.681634	-0.380246	0.564711	3.33011	3.23787	green	tan	pink
UBA6	-2.26501	11.6517	0.0434367	-1.16693	-0.0206997	3.52492	4.11874	midnightblue	yellow	orangered3
GAB2	7.55155	13.7101	3.02646e-06	0.669439	1.20203	4.99517	4.05944	purple	brown	darkgreen
ATP6V0A1	5.12161	12.4286	0.000226064	0.502374	1.24136	3.31318	2.44131	brown	greenyellow	brown
PIAS1	3.67929	9.06407	0.00501985	0.296721	1.24138	3.2032	2.43415	darkgreen	blue	greenyellow
SLC4A7	-10.5421	10.3622	7.25549e-07	-2.75895	-1.79995	2.44671	4.72616	lightcyan	turquoise	red
APBA2	-7.01219	8.35373	9.01784e-05	-4.58071	-2.32602	-1.09281	2.36055	turquoise	green	salmon
MAP2K3	2.39676	10.8504	0.0357211	0.0976124	2.33852	2.66133	1.44326	tan	blue	purple
TMSB10	-6.5384	9.46947	8.44963e-05	-1.48459	-0.725634	6.9422	8.04731	green	turquoise	brown
ASTE1	1.73076	13.6587	0.10601	-0.0697067	0.645487	0.212828	-0.075062	grey	tan	purple
RNF19A	-4.26783	12.806	0.000946891	-1.32182	-0.432443	2.89276	3.76988	turquoise	green	salmon
PEX3	0.111477	12.5248	0.913005	-0.308414	0.341838	1.09432	1.07761	midnightblue	tan	turquoise
GABARAPL2	3.4691	7.43231	0.009481	0.35529	1.82219	3.35616	2.26742	darkred	orange	red
SH3YL1	3.68201	13.0079	0.00276064	0.211334	0.811333	1.84495	1.33361	salmon	brown	yellow
FAM136A	-11.776	12.8434	2.97212e-08	-1.9408	-1.33846	1.16182	2.80145	blue	turquoise	yellow4
VCL	0.0735241	13.768	0.942447	-0.142578	0.152684	6.30695	6.3019	red	grey	brown
DEPDC1B	-6.40741	8.19154	0.000187374	-5.97705	-2.82284	-3.43069	0.969258	blue	turquoise	brown
DAPK2	-1.84655	9.99034	0.0946075	-2.33617	0.218932	-2.02783	-0.96921	black	green	red
NSMAF	-5.90172	13.9855	3.8729e-05	-1.00665	-0.469967	2.42582	3.16413	green	turquoise	purple
ADSS	-1.9009	13.6856	0.0785842	-0.70918	0.0435144	3.95383	4.28667	midnightblue	yellow	antiquewhite4
TIMP2	4.14872	13.7305	0.0010234	0.468151	1.4741	5.37197	4.40085	tan	brown	tan
RFC1	-3.41822	12.8448	0.00465231	-0.588608	-0.132375	3.23738	3.59787	midnightblue	yellow	yellow
TBC1D23	1.09245	12.4371	0.295344	-0.218038	0.660003	2.74896	2.52798	darkgrey	pink	grey
CUL3	-4.22036	8.21375	0.00274685	-0.785925	-0.232155	2.76168	3.27072	pink	tan	turquoise
TUBG2	3.62955	10.5497	0.00423337	0.25617	1.05611	1.48578	0.829638	brown	brown	darkorange
RPL26L1	-5.41925	8.1129	0.000602056	-1.93843	-0.783143	-1.22124	0.139552	turquoise	turquoise	cyan
FLT4	-5.03535	13.8831	0.000186881	-3.11954	-1.25482	1.83022	4.0174	black	green	coral2
NSUN2	-6.733	13.8616	1.00792e-05	-1.11883	-0.577851	3.0941	3.94244	blue	turquoise	magenta
FBXO42	2.89826	11.6092	0.0137804	0.0800246	0.572129	2.78977	2.46369	salmon	brown	yellow
MFAP3	3.08379	10.5005	0.0109483	0.170682	1.03937	3.30312	2.6981	greenyellow	magenta	yellow
MRI1	-2.13089	9.13416	0.0614899	-1.09606	0.0315251	1.29123	1.8235	black	red	blue
METTL1	-1.93559	10.6393	0.0799279	-1.1263	0.0745848	0.00328412	0.529143	blue	turquoise	magenta
AGA	3.10388	9.96174	0.011226	0.158345	0.96559	1.3651	0.803133	yellow	blue	brown
PI4K2B	-1.27896	13.7828	0.222026	-1.43135	0.362963	0.0672949	0.601488	pink	yellow	plum
BOD1L1	5.79751	10.3124	0.000154017	0.446956	1.00127	4.1927	3.46859	yellow	brown	yellow
MAT2B	-0.924733	12.8148	0.372191	-0.551962	0.221411	3.33052	3.4958	pink	yellow	turquoise
TLL1	-1.30174	10.7775	0.220142	-3.53696	0.912201	-2.49701	-1.18463	magenta	yellow	green
EDC4	-6.02165	10.5582	0.000102586	-0.840122	-0.388678	3.32584	3.94024	green	red	royalblue
TRIO	-1.05414	11.1257	0.314173	-0.405855	0.142746	5.34538	5.47694	red	black	yellow
VCAN	15.2889	13.3429	7.67064e-10	7.31989	9.72164	6.28499	-2.23578	yellow	blue	white
CLEC16A	0.960558	13.0699	0.354209	-0.213828	0.556541	2.69211	2.52076	magenta	midnightblue	thistle1
MSR1	2.98976	13.7337	0.00992063	0.5647	3.45002	-0.310595	-2.31795	yellow	brown	thistle1
ZFYVE16	0.848975	10.768	0.414371	-0.291322	0.655623	3.23516	3.05301	greenyellow	pink	yellow
RIPOR1	3.32398	9.93687	0.00776141	0.22013	1.11764	4.16755	3.49867	tan	greenyellow	darkmagenta
RAI14	-5.98152	8.52719	0.000256789	-0.915453	-0.409935	5.32764	5.99033	blue	turquoise	steelblue
PNKP	-1.67533	7.3601	0.135677	-0.83854	0.139045	2.38577	2.73552	darkturquoise	red	turquoise
PHLPP2	-2.08845	10.4345	0.062152	-0.79816	0.0235845	1.37663	1.76391	blue	turquoise	brown
SPDL1	-8.03093	12.1409	3.35134e-06	-3.60621	-2.0686	0.0788015	2.9162	blue	yellow	purple
STAU2	2.03924	8.76454	0.072693	-0.0347616	0.645284	3.02527	2.72001	greenyellow	magenta	green
PQLC2	-8.03815	9.1687	1.90834e-05	-0.971693	-0.545818	0.315929	1.07468	turquoise	turquoise	turquoise
CTNS	0.0841468	9.4372	0.934698	-0.383804	0.413679	1.90788	1.89294	magenta	black	yellow
PHF23	-6.89162	12.1385	1.57388e-05	-1.1774	-0.612297	2.29768	3.19253	turquoise	turquoise	turquoise
INPP4A	-2.94512	11.2674	0.0130166	-0.426848	-0.0623273	2.94258	3.18717	green	green	cyan
PSMA4	-6.76193	10.7191	3.53271e-05	-1.71501	-0.870679	3.00068	4.29353	blue	yellow	brown
LSG1	-4.32496	13.7675	0.000725369	-0.710159	-0.23881	3.14968	3.62416	blue	turquoise	turquoise
PARP3	1.00437	11.0497	0.336686	-0.205441	0.550664	1.22312	1.0505	red	darkgrey	darkred
THAP3	-4.34765	8.7145	0.0020035	-1.34944	-0.422725	0.225496	1.11158	turquoise	turquoise	turquoise
TDP1	-11.3874	12.7778	4.64815e-08	-2.31889	-1.57824	0.687555	2.63612	blue	turquoise	turquoise
AIFM2	-8.85034	11.8056	1.4844e-06	-2.51596	-1.52044	-1.76985	0.248352	turquoise	turquoise	darkorange2
SPATA7	1.94346	13.3698	0.0733154	-0.0457796	0.889715	0.768895	0.346927	salmon	grey60	black
MED17	-6.76824	13.8329	9.62808e-06	-1.45612	-0.75473	-0.368418	0.737009	blue	turquoise	thistle2
RETSAT	-0.633221	12.2354	0.538245	-0.413949	0.227213	2.66825	2.76162	black	green	black
CAPG	-1.8405	7.55321	0.105162	-1.89797	0.222752	1.64773	2.48534	turquoise	turquoise	lightcyan1
AP2S1	-11.0117	8.69422	2.11896e-06	-2.01827	-1.32729	2.61024	4.28302	turquoise	turquoise	brown
DCUN1D1	1.51588	10.0693	0.160295	-0.267491	1.4094	2.44332	1.87236	darkred	orange	turquoise
JADE2	3.33104	9.97458	0.00763068	0.242221	1.22194	3.16149	2.42941	tan	blue	green
TRIT1	-3.16542	11.864	0.00824393	-0.492959	-0.0907034	1.59668	1.88851	green	turquoise	orange
CUL7	-2.22396	13.605	0.0436356	-0.741358	-0.0124245	3.24484	3.62173	black	black	red
CTNNA1	-0.676056	7.73973	0.518691	-0.373092	0.204692	6.59668	6.68088	red	red	skyblue
PHKA2	4.82897	10.8016	0.000556299	0.457606	1.22728	2.61249	1.77005	brown	greenyellow	red
CNTLN	3.50512	12.1107	0.00428403	0.228909	0.978984	2.08799	1.48405	brown	magenta	blue
HSPA5	0.684357	13.6029	0.505243	-0.260939	0.504509	6.20754	6.08576	grey	grey	brown
GEMIN8	-2.96681	12.093	0.0116839	-0.701032	-0.107647	0.854635	1.25897	black	green	paleturquoise
OFD1	4.59319	13.8797	0.000427012	0.316766	0.872585	1.67826	1.08359	purple	brown	blue
PREX2	0.812565	12.6718	0.431469	-0.394717	0.868648	4.83767	4.6007	red	pink	paleturquoise
WDR37	2.33851	7.91404	0.0478609	0.00322985	0.533663	2.91789	2.64944	purple	brown	blue
YTHDC2	2.02939	12.905	0.0635645	-0.0196366	0.620725	3.37497	3.07443	purple	blue	blue
CTPS2	0.866805	12.7688	0.402044	-0.133809	0.312587	2.12736	2.03797	lightgreen	black	blue
ATP6V1H	-3.8749	9.16296	0.00363495	-0.901743	-0.238103	1.97865	2.54857	black	turquoise	yellow
POLR2B	-6.75058	13.4525	1.14275e-05	-1.2591	-0.650166	4.20272	5.15735	green	yellow	turquoise
FAM214A	2.66612	9.87621	0.0238877	0.106228	1.19835	2.00176	1.34947	greenyellow	blue	darkgreen
ARAP2	7.54341	9.04545	3.43252e-05	3.46103	6.42277	0.463295	-4.47861	white	blue	turquoise
TPR	4.92457	13.9134	0.000227866	0.259558	0.660505	5.91134	5.45131	red	blue	pink
KIAA0556	2.67207	13.6265	0.0185669	0.0845735	0.781678	2.59202	2.1589	royalblue	purple	blue
DTNBP1	3.73158	13.1326	0.00247327	0.428871	1.60537	0.437673	-0.579448	tan	greenyellow	lightyellow
ANO2	15.6759	13.9061	3.12248e-10	3.04308	4.0085	5.20607	1.68028	brown	brown	blue
C12orf4	-3.10858	13.9337	0.00773701	-1.02334	-0.187523	1.41292	2.01835	midnightblue	yellow	darkturquoise
SCML1	0.302756	11.6141	0.76743	-0.368536	0.486975	0.463201	0.403982	pink	yellow	orangered4
WWC3	5.22104	11.1716	0.000270959	0.377033	0.924814	4.51675	3.86583	yellow	brown	yellow
MAP4	1.5953	11.0245	0.138889	-0.0750685	0.470903	6.15515	5.95723	red	salmon	brown
GOPC	1.0424	13.8348	0.3151	-0.205773	0.59408	2.43773	2.24358	greenyellow	pink	yellow
USP28	-8.23709	10.9346	5.13845e-06	-1.20563	-0.696893	1.90637	2.85763	turquoise	turquoise	orange
TSPAN17	-4.55301	10.2523	0.000988385	-1.26559	-0.435759	2.33805	3.18873	turquoise	turquoise	blue
NOP16	-6.75676	13.8211	9.84952e-06	-2.01451	-1.04284	-0.0613601	1.46731	turquoise	turquoise	magenta
CC2D2A	6.96976	10.6532	2.78695e-05	0.568313	1.09598	2.43507	1.60293	lightgreen	blue	blue
RRM2B	-3.8943	12.2248	0.0020614	-1.51317	-0.428847	2.23339	3.20439	black	yellow	green
ZNF800	2.82134	8.96042	0.0200878	0.0949785	0.866059	2.35716	1.87665	greenyellow	darkred	turquoise
SNX29	4.6118	13.2914	0.00046028	0.361449	0.995855	2.57478	1.89613	salmon	brown	cyan
MRPS10	-5.63089	10.8685	0.000160125	-1.41358	-0.61822	1.417	2.4329	blue	yellow	blue
RSF1	6.64256	10.6027	4.35607e-05	0.571256	1.14131	4.08056	3.22428	yellow	blue	lightyellow
VPS13D	9.01805	13.7293	3.85481e-07	0.803699	1.30651	5.14322	4.08812	purple	brown	black
CELF2	-0.992596	11.3851	0.341535	-0.841103	0.316771	2.47049	2.73265	pink	yellow	turquoise
FAM120A	-2.51409	12.1615	0.0269752	-0.609557	-0.0439948	4.39043	4.71721	turquoise	salmon	brown
R3HDM1	-1.36919	8.46237	0.206175	-1.36243	0.341242	1.77246	2.28305	pink	tan	brown
KITLG	1.10715	13.9807	0.286915	-0.370758	1.16174	1.81825	1.42276	greenyellow	pink	orangered4
ERCC8	-2.53826	11.5011	0.026755	-1.19914	-0.0885016	0.269258	0.913081	blue	yellow	mediumorchid
ADAMTS6	-5.51949	12.9316	0.000100731	-2.00889	-0.878241	1.61685	3.06041	green	turquoise	turquoise
H6PD	3.47746	13.636	0.00383011	0.205644	0.871918	4.92567	4.38689	brown	brown	midnightblue
VAMP3	-1.21855	7.71004	0.258984	-0.57102	0.177874	4.17487	4.37145	grey60	tan	blue
PER3	3.39344	9.23969	0.00766025	0.649498	3.21657	0.912821	-1.02021	brown	blue	skyblue3
LTBP1	5.94335	13.3307	4.3957e-05	1.4223	3.04037	6.35753	4.12619	brown	blue	floralwhite
RCN1	-8.09239	13.9988	1.19848e-06	-1.41878	-0.824282	2.58385	3.70539	black	green	blue
RFC2	-6.23106	9.12244	0.000144517	-1.42496	-0.667023	1.04301	2.089	blue	turquoise	magenta
ARID1B	4.69697	10.1037	0.000822154	0.37227	1.04245	4.32573	3.61837	yellow	greenyellow	black
CLPTM1L	-2.85777	9.27485	0.0183004	-0.672051	-0.0796755	3.90808	4.28395	blue	turquoise	turquoise
NEDD4L	12.6382	13.602	6.6941e-09	1.6047	2.26286	3.28892	1.35514	white	blue	red
PPP1R3F	4.23558	13.657	0.000875848	0.458635	1.40411	0.0137646	-0.917607	magenta	brown	yellow
HEXB	1.93975	8.98836	0.0843854	-0.0381504	0.496571	4.32356	4.09435	greenyellow	pink	black
PTCD2	-1.0803	11.8065	0.301583	-0.424458	0.14341	0.990176	1.1307	green	turquoise	cyan
JKAMP	-1.13134	7.983	0.290749	-1.06637	0.364591	2.03916	2.39005	darkgrey	yellow	turquoise
DKK3	5.79158	11.6137	9.76363e-05	1.5363	3.40037	6.96267	4.49433	brown	brown	sienna3
NFE2L3	-6.32281	8.82811	0.000149157	-2.14864	-1.01382	2.12147	3.7027	turquoise	turquoise	darkgrey
MCUR1	-1.13766	11.7262	0.277973	-0.458654	0.144522	1.50029	1.65735	cyan	tan	darkturquoise
LIMA1	5.20828	13.9477	0.000134182	0.474223	1.13864	5.35788	4.55145	red	blue	grey60
LETMD1	6.12239	11.9677	5.21804e-05	0.459726	0.967957	2.64377	1.92993	purple	brown	black
SLC4A8	-8.52872	13.9525	6.61345e-07	-4.10148	-2.45272	-2.51699	0.760106	turquoise	turquoise	lightcyan1
MAPK9	-1.48964	9.91547	0.167423	-0.4019	0.0800566	2.33268	2.4936	pink	yellow	red
BCAR1	-5.82873	10.2383	0.000151692	-1.19256	-0.534456	5.33619	6.1997	green	turquoise	bisque4
FAM160A2	4.80285	10.8735	0.000569051	0.331716	0.894406	2.93496	2.3219	lightgreen	brown	pink
HERPUD1	9.26083	12.8597	4.74416e-07	0.911896	1.4676	3.55992	2.37017	yellow	blue	sienna3
HOMER3	-7.26546	10.6575	1.9177e-05	-2.02508	-1.08056	1.72117	3.27399	black	green	darkgreen
POLQ	-10.07	10.1405	1.33441e-06	-5.07979	-3.24193	-2.37305	1.78781	blue	turquoise	brown
PIK3CB	4.45971	13.3049	0.000608458	0.560451	1.60887	1.95697	0.872308	tan	greenyellow	magenta
CYBA	-1.02253	9.4777	0.331922	-1.10858	0.414729	2.40391	2.75084	blue	turquoise	lightcyan
THOC3	-6.43608	9.65239	8.77805e-05	-2.14337	-1.03696	-0.688077	0.902087	blue	turquoise	orange
HEBP2	-3.46689	8.6469	0.00752698	-1.00234	-0.207785	2.89905	3.50411	blue	yellow	brown
MPHOSPH9	-4.55933	13.1315	0.000522626	-1.2447	-0.444917	1.7568	2.60161	green	turquoise	brown
PLEKHA5	1.7567	10.3063	0.108588	-0.122315	1.05148	1.88806	1.42348	salmon	brown	midnightblue
SIKE1	1.65448	11.32	0.125464	-0.111073	0.793044	2.82095	2.47997	grey60	pink	yellow
RRP12	2.25561	9.48982	0.0490817	0.00381839	1.54443	3.63241	2.85829	red	blue	darkolivegreen
FNIP2	28.8721	10.7585	1.53427e-11	2.76478	3.22246	4.61805	1.62443	yellow	blue	black
MSMO1	-3.28524	13.8148	0.00550365	-2.09326	-0.438384	1.47091	2.73673	midnightblue	yellow	turquoise
TTC17	6.91744	11.1768	2.32957e-05	0.528968	1.02127	4.37945	3.60433	brown	grey60	darkorange
FOXN3	11.0554	9.59298	9.00996e-07	1.11637	1.68403	4.23036	2.83016	yellow	blue	yellow
AKR7A2	-8.80501	10.2859	4.1495e-06	-1.01906	-0.608696	2.1499	2.96378	blue	turquoise	blue
MRTO4	-7.34038	13.9802	3.70452e-06	-2.01183	-1.1019	1.66632	3.22319	blue	turquoise	magenta
NNAT	-3.09063	11.8899	0.00944367	-1.99984	-0.345052	-0.594696	0.57775	black	turquoise	violet
USE1	3.02725	12.9837	0.00972794	0.154567	0.925308	0.623131	0.0831935	tan	brown	red
LAMA3	9.20998	13.3623	3.72635e-07	1.70759	2.75042	3.75328	1.52428	purple	blue	navajowhite2
AP5M1	-1.24944	11.9072	0.235508	-0.954962	0.259266	2.33126	2.67911	grey60	lightcyan	brown
ANAPC4	0.435885	13.6864	0.669717	-0.287739	0.434129	1.76922	1.69603	midnightblue	tan	greenyellow
TRAPPC3	-2.64481	8.46861	0.0280927	-0.579963	-0.0424586	2.89663	3.20784	blue	turquoise	turquoise
THRAP3	-4.90609	13.5279	0.000255737	-0.438801	-0.171236	4.85818	5.1632	green	turquoise	yellow
PHPT1	-7.55568	8.48788	4.79177e-05	-1.18767	-0.63646	2.11647	3.02854	turquoise	green	lightgreen
LY75	-1.94173	13.1485	0.0739066	-1.47452	0.0777457	-1.37439	-0.676007	turquoise	turquoise	blue
ARID4B	6.07909	12.9187	4.0171e-05	0.504467	1.06124	3.68786	2.90501	yellow	brown	darkred
OPN3	-4.29085	8.29644	0.0024346	-2.00162	-0.607884	-1.86524	-0.560493	black	turquoise	red
SDCCAG8	1.85276	13.7626	0.0854807	-0.025167	0.34075	2.42186	2.26407	red	grey	orangered4
HHAT	14.5484	13.4326	1.31617e-09	2.33385	3.14473	0.995188	-1.7441	yellow	blue	lightgreen
KIF1B	-0.370574	11.1584	0.717893	-0.273021	0.194217	3.95338	3.99278	pink	salmon	darkorange2
FOXC1	14.7071	13.7548	8.37262e-10	2.67109	3.58497	5.26841	2.14038	yellow	blue	ivory
TBC1D22A	0.0950795	11.4909	0.92589	-0.292408	0.318956	2.79884	2.78556	lightyellow	black	blue
SYNE2	9.377	13.843	2.26078e-07	1.79552	2.86195	6.11289	3.78416	purple	blue	black
ATP9A	-1.20309	13.608	0.249457	-0.686591	0.193981	3.77884	4.02515	salmon	black	blue
FAM168A	12.1711	13.8164	9.03535e-09	0.803517	1.14781	4.07725	3.10159	yellow	brown	yellow
RELT	-1.89912	7.61711	0.0959406	-1.4427	0.145867	0.843984	1.4924	turquoise	turquoise	royalblue
GALC	5.6396	11.9671	0.000110194	0.694926	1.57037	3.02737	1.89472	yellow	blue	lightcoral
NOP58	-4.3741	13.724	0.000665125	-1.0779	-0.367718	2.45539	3.1782	midnightblue	yellow	magenta
SZRD1	-4.2467	11.8159	0.00117295	-0.612686	-0.196702	3.67351	4.0782	black	turquoise	blue
CUL1	-5.01115	9.38219	0.000641593	-0.820451	-0.31227	2.94092	3.50728	cyan	yellow	turquoise
FAM114A2	2.75598	8.73833	0.0228654	0.0880855	0.91619	2.82713	2.32499	purple	blue	midnightblue
CYFIP2	-0.376992	13.1735	0.712182	-0.836737	0.587814	2.65363	2.77809	salmon	cyan	cyan
TAB2	1.53734	8.91821	0.158895	-0.216102	1.12883	3.34171	2.88535	greenyellow	darkred	turquoise
GINM1	7.97638	13.9741	1.43491e-06	0.968182	1.68052	3.44556	2.12121	greenyellow	blue	black
EIF2AK2	3.79783	8.09994	0.00513374	0.412601	1.68122	4.28987	3.24296	darkgreen	magenta	cyan
USP36	1.89176	8.61952	0.0925234	-0.0682986	0.738261	3.07874	2.74376	grey	midnightblue	yellow
KMT2C	8.38299	12.5661	1.69103e-06	0.724219	1.22948	5.0982	4.12135	purple	blue	yellow
CCDC85A	-4.06778	13.9773	0.00115606	-1.59739	-0.494335	-0.320517	0.725346	black	turquoise	orange
PUM2	6.24914	12.0742	4.14431e-05	0.743453	1.53855	4.27551	3.13451	tan	greenyellow	yellow
MRPL43	-5.68606	12.0009	0.000101307	-0.730042	-0.325556	2.093	2.6208	turquoise	turquoise	turquoise
HPF1	-1.70688	13.5351	0.11067	-0.816219	0.0940987	0.234864	0.595924	pink	yellow	blue
ZFR	-1.42652	8.43931	0.189647	-0.411607	0.095229	4.34559	4.50378	midnightblue	tan	green
ZNF280C	-1.4294	8.00501	0.190732	-0.820004	0.192393	0.593943	0.907749	green	tan	grey
TRAF1	13.3651	13.5999	3.30522e-09	2.23503	3.0923	1.46378	-1.19989	brown	blue	lightpink4
RC3H2	0.661158	9.29665	0.524556	-0.213977	0.391925	4.27643	4.18745	grey60	pink	red
TRAF3IP2	-0.511188	13.9947	0.617189	-0.535057	0.329101	1.30233	1.40531	magenta	green	greenyellow
DCBLD2	-11.1416	13.6351	3.14839e-08	-2.52547	-1.70839	2.35717	4.47411	turquoise	turquoise	turquoise
SOAT1	-1.93347	12.0207	0.0770732	-0.671139	0.0399768	2.16541	2.48099	cyan	yellow	pink
PKP2	2.72468	13.5817	0.0168063	0.362127	3.07771	-0.642175	-2.36209	greenyellow	grey	orangered3
GDI2	-2.66617	8.12356	0.0281502	-1.09585	-0.080821	5.30573	5.89407	green	yellow	blue
PRDM1	-2.63167	10.5681	0.0240492	-2.49201	-0.215908	-1.4169	-0.0629444	black	green	lightcyan
ATG5	-1.23294	10.2673	0.245081	-0.501555	0.143406	2.54999	2.72907	midnightblue	yellow	yellowgreen
TMCC3	3.62091	10.5859	0.0042729	0.34321	1.42031	4.85172	3.96996	brown	brown	blue
PITHD1	1.53062	7.51875	0.166786	-0.316717	1.52664	2.9676	2.36264	darkred	lightgreen	maroon
MTA3	0.406202	13.6884	0.690873	-0.224595	0.329268	2.44851	2.39618	magenta	purple	yellow
USP13	-4.87891	13.67	0.000260861	-0.810659	-0.314786	1.77129	2.33402	blue	turquoise	brown
ATP11B	3.62804	9.95531	0.00466141	0.321442	1.3463	4.51031	3.67644	brown	magenta	sienna3
LAMC2	-1.71354	11.4789	0.113459	-3.95954	0.483145	-1.07576	0.66244	lightcyan	turquoise	violet
CDK14	-5.63442	11.7246	0.000119965	-1.35979	-0.599976	1.37677	2.35665	turquoise	turquoise	pink
SEC61A1	-3.8989	13.9475	0.00161582	-0.702022	-0.203641	5.66433	6.11716	blue	turquoise	brown
PPP1R12A	7.01243	12.7984	9.97766e-06	0.534086	1.01079	4.58283	3.81039	purple	blue	turquoise
CROCC	4.22795	8.09827	0.00280615	0.486111	1.64722	2.87057	1.8039	orange	brown	blue
POLR3E	-1.64533	8.81655	0.135014	-0.59601	0.095008	2.89945	3.14996	green	turquoise	turquoise
ATP2B4	2.85429	13.6985	0.0129696	0.138331	0.98167	6.1968	5.6368	yellow	brown	cyan
RIOK2	-2.64125	13.5538	0.0197787	-0.713174	-0.0728881	1.31917	1.7122	cyan	yellow	turquoise
YIPF1	0.137086	11.5035	0.893333	-0.335264	0.380055	1.41821	1.39582	green	turquoise	red
NDC1	-4.38013	11.3685	0.00101692	-2.34539	-0.780726	1.73948	3.30254	midnightblue	yellow	magenta
FLYWCH1	1.27282	9.78525	0.232489	-0.199195	0.726328	3.28512	3.02156	royalblue	purple	pink
UNKL	-1.06077	8.26299	0.318815	-0.678528	0.249341	1.78786	2.00246	turquoise	red	salmon
TBXAS1	2.19067	8.36022	0.0584321	-0.0615266	2.8079	0.144586	-1.2286	red	brown	brown
PARP12	1.55346	13.7333	0.14305	-0.0793043	0.49324	3.64606	3.43909	red	brown	brown
ALDH18A1	0.796917	13.1281	0.439675	-0.169302	0.367523	4.46586	4.36675	red	red	red
TARBP1	3.25306	10.9318	0.00775289	0.165754	0.860918	2.84235	2.32901	lightgreen	brown	brown
GATB	-5.31571	9.58961	0.000391194	-1.19146	-0.484757	0.926054	1.76416	turquoise	turquoise	ivory
MXD1	5.18689	8.05835	0.000816652	1.15363	2.9963	2.75592	0.68096	brown	blue	turquoise
CDK17	-3.28255	13.619	0.005626	-0.859367	-0.179075	4.47348	4.9927	green	yellow	red
DNAJC25	0.565923	13.6025	0.580663	-0.420594	0.720984	-0.555543	-0.705738	pink	yellow	turquoise
SLC2A3	8.05018	12.4178	2.82241e-06	2.38223	4.14127	5.57894	2.31719	yellow	brown	black
CTDP1	-0.594254	8.04255	0.568678	-0.454509	0.268118	2.40305	2.49625	black	red	red
YBX3	4.93081	9.58575	0.000674496	0.568425	1.51579	6.68481	5.6427	yellow	brown	white
STYK1	-8.25695	7.95646	3.58829e-05	-2.83923	-1.59864	-0.495603	1.72333	blue	turquoise	yellowgreen
WNK1	3.6566	7.91685	0.00654936	0.44998	1.99421	6.1656	4.9435	yellow	blue	greenyellow
CCAR1	-3.01286	11.697	0.0110865	-0.48586	-0.0773729	3.48999	3.77161	blue	turquoise	darkmagenta
OGFR	0.702351	8.5435	0.501146	-0.248217	0.469122	3.20953	3.09908	lightyellow	black	black
PIGV	1.75305	10.0711	0.109923	-0.0747618	0.628976	0.837312	0.560205	salmon	brown	green
PTPRU	-0.380599	13.1956	0.709557	-0.773766	0.541672	0.205423	0.32147	lightyellow	black	darkgreen
SNRNP40	-5.93818	11.5409	8.02185e-05	-1.28441	-0.59264	2.78402	3.72254	green	turquoise	brown
QSER1	1.13431	7.76873	0.290451	-0.257455	0.750879	2.95658	2.70987	tan	darkred	darkorange2
MPC1	0.970887	11.7969	0.351091	-0.273606	0.711923	0.814486	0.595327	grey60	darkgreen	cyan
ACAA1	1.30544	13.652	0.213316	-0.19605	0.802175	1.79423	1.49117	magenta	midnightblue	black
BCAT1	-1.63951	10.6009	0.130411	-1.09742	0.16291	5.57755	6.0448	midnightblue	yellow	brown
HDAC7	3.4435	7.89272	0.00896127	0.169614	0.862276	5.69429	5.17835	purple	brown	midnightblue
SPAG4	-0.420302	11.8188	0.681805	-0.903011	0.611376	-0.193649	-0.0478312	grey	green	red
NCKAP1	-0.959335	9.55164	0.361043	-0.462841	0.185479	5.10587	5.24455	grey60	tan	green
MRPS35	-4.623	11.8269	0.000609756	-1.45021	-0.520098	1.7405	2.72565	cyan	yellow	darkmagenta
SFSWAP	-1.92609	10.2731	0.0821931	-0.597141	0.0423477	2.99559	3.27299	darkturquoise	red	yellow
TNK2	-6.26924	10.2503	8.31985e-05	-2.2724	-1.08359	1.20956	2.88755	black	green	blue
MON2	6.94918	9.48953	5.14314e-05	0.539031	1.05335	3.57083	2.77464	brown	blue	red
GPBP1	3.74893	11.4533	0.0030027	0.261669	0.997185	3.89801	3.26858	darkgreen	magenta	green
DGAT2	2.34645	7.84699	0.0475393	0.0199542	2.85318	-0.194607	-1.63118	brown	blue	magenta
ZNF112	-3.09703	13.1535	0.00839302	-0.931002	-0.166403	-0.157612	0.39109	black	turquoise	blue
CS	-8.05552	10.0676	1.06323e-05	-1.45526	-0.825091	3.73561	4.87578	blue	turquoise	brown
ELMO2	3.11326	13.2528	0.00807018	0.0840448	0.462733	2.77757	2.50418	magenta	brown	greenyellow
WAPL	-1.57911	9.15431	0.1482	-0.614503	0.108506	3.55171	3.8047	cyan	yellow	turquoise
VMP1	5.3136	12.1797	0.000175174	0.580294	1.38472	6.45137	5.46886	purple	blue	turquoise
APPBP2	2.19357	9.90201	0.0532727	-0.00790573	0.93138	3.5669	3.10516	darkgreen	magenta	greenyellow
POLD1	-10.2776	12.5692	1.7691e-07	-2.43736	-1.58822	1.26165	3.27444	blue	turquoise	royalblue
EIF4B	2.9488	13.6114	0.0108384	0.103903	0.663743	5.95058	5.56676	lightgreen	cyan	black
BICRA	2.63525	13.9751	0.0196077	0.196837	1.91991	0.767094	-0.291279	tan	greenyellow	yellow
SPHK2	-8.30233	9.5871	1.10963e-05	-1.93779	-1.11397	0.139594	1.66547	black	red	darkred
RPL18	-1.44682	7.78605	0.186977	-0.510693	0.118078	6.43506	6.63137	red	royalblue	blue
CA11	3.47158	13.3839	0.0039732	0.540505	2.30795	-0.0427404	-1.46697	salmon	brown	yellow
ISOC2	-2.41376	10.257	0.0358768	-0.7499	-0.0312567	2.34354	2.73412	blue	red	lightgreen
U2AF2	-6.81301	13.8204	9.0065e-06	-0.954878	-0.497196	3.88616	4.6122	turquoise	turquoise	turquoise
EPN1	1.08311	10.8413	0.302259	-0.139916	0.410095	4.46139	4.3263	magenta	midnightblue	sienna3
MED29	4.00427	13.9931	0.00130627	0.221152	0.73137	2.82279	2.34653	yellow	blue	navajowhite2
AHRR	-10.0123	9.59736	2.16732e-06	-6.16613	-3.91078	-3.36399	1.67447	turquoise	green	lightcyan1
ZNF275	0.0242513	10.8787	0.981091	-0.202688	0.207199	1.91994	1.91768	magenta	green	darkgreen
MTMR1	-5.84639	10.6515	0.000126637	-0.823689	-0.371816	1.79992	2.39767	turquoise	turquoise	saddlebrown
GPC1	-5.18127	10.001	0.000412185	-2.99199	-1.19252	0.564919	2.65717	black	green	cyan
ADCK1	3.84229	13.9636	0.00180255	0.330799	1.16719	-0.00324921	-0.752243	yellow	brown	greenyellow
HAGH	-0.0660929	7.56773	0.949016	-0.852649	0.805594	2.49204	2.51557	darkred	lightgreen	yellow
RNF4	-7.94777	9.46075	1.73811e-05	-1.15129	-0.644054	2.96043	3.8581	blue	turquoise	steelblue
CASP8	2.0207	12.5638	0.0651536	-0.0327918	0.932366	1.24285	0.79306	red	grey	purple
LIMCH1	5.0971	7.56954	0.00110615	1.3153	3.52866	3.95392	1.53194	yellow	brown	blue
INTS13	-11.0444	12.757	6.74891e-08	-1.4412	-0.968864	1.71554	2.92057	blue	turquoise	darkmagenta
TM7SF3	-3.86399	9.74753	0.0032926	-0.700116	-0.186852	3.12781	3.5713	blue	turquoise	cyan
SPA17	-2.87216	10.6844	0.0155985	-2.21824	-0.289537	-2.71897	-1.46508	pink	yellow	blue
ST3GAL6	-3.03499	12.6271	0.00985197	-1.40359	-0.23424	0.789656	1.60857	black	yellow	orange
CDON	15.8975	11.9526	2.10375e-09	4.41982	5.82445	3.94229	-1.17984	brown	blue	greenyellow
TAF2	-2.4969	10.1837	0.0312257	-0.724315	-0.0420811	2.93121	3.31441	midnightblue	yellow	turquoise
HIPK2	-1.7237	13.7277	0.107197	-0.768953	0.0844082	3.8303	4.17258	pink	salmon	green
TNPO3	-7.49539	12.8061	4.95451e-06	-0.784981	-0.433299	3.63905	4.24819	green	turquoise	magenta
RFXANK	-9.43993	13.5646	2.46753e-07	-1.23586	-0.777124	1.58114	2.58764	turquoise	green	blue
TMEM161A	-1.47416	13.1287	0.164011	-0.411367	0.0774702	1.85029	2.01724	green	red	tan
LPAR2	1.66771	8.53013	0.131577	-0.360675	2.32131	-0.555897	-1.53621	brown	brown	brown
CTSA	-2.87827	13.3868	0.0126169	-0.745739	-0.107323	3.54254	3.96908	black	turquoise	yellow
SUGP2	-2.02027	8.8706	0.0745483	-0.71399	0.0411203	3.45746	3.79389	darkturquoise	red	turquoise
SLC12A2	-9.24061	13.9924	2.47276e-07	-2.2563	-1.40618	1.46585	3.29709	turquoise	turquoise	orange
SNX24	0.452221	13.7738	0.65815	-0.236261	0.362263	0.405337	0.342336	grey	grey	cyan
CNN2	-6.19053	10.1632	9.58225e-05	-1.45281	-0.685019	3.8545	4.92342	turquoise	turquoise	blue
ABCA7	0.322941	12.0657	0.752268	-0.869683	1.17257	0.873549	0.722108	salmon	cyan	black
SNCAIP	2.35899	13.2818	0.0342668	0.0615924	1.36799	2.56114	1.84635	magenta	brown	yellow
DDX20	-7.31639	10.3011	2.17079e-05	-1.86929	-0.999172	1.15288	2.58711	cyan	yellow	turquoise
BTBD1	-1.46244	12.4401	0.168422	-0.45117	0.0879127	3.72666	3.90829	midnightblue	yellow	pink
FAR2	-4.76204	8.51604	0.00119694	-1.81379	-0.638624	2.44884	3.67505	turquoise	yellow	darkgreen
SBNO2	9.99255	8.29755	6.56323e-06	1.35669	2.16416	5.56738	3.80696	brown	blue	turquoise
PMS1	-0.0451812	9.8073	0.96487	-0.432266	0.415128	1.53041	1.53897	darkgrey	yellow	turquoise
HMG20B	-3.37807	11.6597	0.00570037	-0.845317	-0.181126	2.74802	3.26125	black	red	blue
CALCRL	6.84822	11.5065	2.20363e-05	1.59867	3.10108	7.74228	5.3924	brown	blue	white
TAF11	-1.46172	12.2843	0.168924	-0.48996	0.0959057	1.93933	2.13635	turquoise	yellow	skyblue
ANKS1A	6.49127	11.8437	3.16491e-05	0.415602	0.836484	3.35492	2.72887	yellow	brown	black
AP3D1	-6.48775	13.0732	1.9881e-05	-1.21594	-0.608698	4.48613	5.39845	turquoise	turquoise	yellowgreen
ZNF76	5.84161	13.0903	5.60672e-05	0.537828	1.16838	2.78544	1.93234	brown	brown	blue
SLC9A3R2	6.3535	10.8491	5.76789e-05	1.07772	2.22316	4.68431	3.03387	tan	blue	greenyellow
NTHL1	-0.741575	8.5044	0.478322	-0.495465	0.252458	1.60939	1.7309	black	black	greenyellow
UHRF1BP1	6.82456	13.485	1.00531e-05	0.477717	0.917901	3.12608	2.42827	brown	blue	navajowhite2
GNAI3	-1.48788	11.4856	0.163714	-0.704506	0.134443	4.40042	4.68546	green	yellow	brown
IPO5	-2.1881	13.9117	0.046233	-0.667876	-0.00647691	5.18997	5.52714	green	turquoise	darkturquoise
OAT	-2.43282	9.11077	0.0374977	-0.957739	-0.0356998	3.68193	4.17865	blue	yellow	blue
WDR3	-4.52217	12.7389	0.000602967	-1.04563	-0.368599	2.8217	3.52881	green	turquoise	grey60
PKN2	-0.978185	10.1272	0.350772	-0.533668	0.20766	3.29757	3.46057	grey60	pink	turquoise
WDR18	-5.61127	13.9146	6.56513e-05	-1.54547	-0.690375	1.55964	2.67756	turquoise	turquoise	orange
TRAM2	2.15664	12.8402	0.0505921	-0.00111271	0.743963	5.43056	5.05913	brown	blue	green
NTN1	21.8969	13.7879	4.16271e-12	5.77486	7.031	2.85018	-3.55276	brown	blue	pink
MCM10	-9.67268	9.47619	3.22849e-06	-5.87771	-3.66332	-2.40941	2.3611	blue	turquoise	brown
DGKA	0.88022	13.9631	0.393638	-0.230745	0.551837	3.21409	3.05354	red	brown	pink
ANKRD44	4.52094	9.66266	0.00120698	0.720806	2.13495	1.73673	0.308849	purple	brown	turquoise
KARS	-6.39561	9.70582	9.00574e-05	-1.29182	-0.622239	4.17435	5.13138	green	turquoise	brown
ADAT1	-1.76078	8.79878	0.112892	-0.592452	0.0748555	1.83779	2.09659	turquoise	turquoise	salmon4
PDIA5	-1.8695	10.0821	0.0908419	-1.08046	0.0939749	2.62393	3.11717	black	green	firebrick4
TBC1D22B	-1.31188	12.8644	0.212489	-0.743686	0.182104	1.39025	1.67104	black	turquoise	green
NDUFB4	-2.96487	7.41493	0.0196203	-1.40006	-0.165488	1.87322	2.65599	pink	yellow	brown
SPEN	5.20427	11.0078	0.000291861	0.625902	1.54316	4.63803	3.5535	yellow	greenyellow	turquoise
MYLK	12.9525	11.6476	2.85374e-08	2.91312	4.09615	5.06901	1.56438	brown	blue	lightcyan
ZC3H15	-4.89789	13.2488	0.000275678	-0.945869	-0.367618	2.91576	3.57251	midnightblue	yellow	darkturquoise
MAP2K4	0.402193	8.6093	0.697344	-0.360163	0.514616	2.4076	2.33038	darkgrey	lightcyan	brown
TMEM206	-7.93084	8.00069	4.64597e-05	-2.94079	-1.61589	-0.56573	1.71261	turquoise	turquoise	yellow
SLK	2.78821	12.3268	0.0160425	0.093456	0.752865	4.69061	4.26745	brown	blue	pink
CYB5R4	0.47347	9.36506	0.646721	-0.399249	0.612206	1.04289	0.936409	pink	pink	steelblue
COL17A1	-2.7147	12.1351	0.0186307	-2.55591	-0.281452	-1.7259	-0.307217	black	green	pink
SEC61A2	-1.13643	9.70541	0.283058	-0.635307	0.20731	-0.441808	-0.22781	black	turquoise	turquoise
TLE2	5.50452	13.3472	9.21763e-05	0.691994	1.5822	3.52299	2.38589	salmon	brown	darkgreen
ASB1	-5.18488	7.1618	0.00118649	-3.78261	-1.42049	-0.724196	1.87736	turquoise	green	steelblue
FAM107B	-1.10936	10.059	0.293093	-0.754963	0.25281	4.31967	4.57074	blue	yellow	salmon
ME1	-8.42034	9.27595	1.21331e-05	-3.1851	-1.84093	-1.04588	1.46714	turquoise	turquoise	turquoise
TBC1D1	0.112645	7.87595	0.91313	-0.406431	0.448057	3.81105	3.79024	grey	turquoise	indianred4
CDK13	3.80857	13.9415	0.00193145	0.0963333	0.344925	3.88809	3.66746	brown	brown	red
MTHFD2	-4.44559	11.1435	0.000955363	-2.25586	-0.76339	1.90568	3.4153	midnightblue	turquoise	turquoise
SLC9A7	-2.26593	13.5954	0.0403551	-0.862854	-0.0224938	2.21701	2.65968	turquoise	turquoise	darkslateblue
FOXJ2	8.89579	8.84506	1.0536e-05	0.921136	1.55163	3.31438	2.078	yellow	blue	black
YBX1	-3.16546	10.6503	0.00933775	-1.03994	-0.184882	4.95609	5.5685	green	turquoise	darkmagenta
PDE4A	7.1636	13.969	4.89238e-06	1.15794	2.14792	1.92456	0.271629	tan	blue	green
PPP2R5A	2.63076	13.9537	0.0198001	0.0816188	0.803271	3.24261	2.80016	salmon	blue	blue
ELAVL1	-5.19794	13.8103	0.000141183	-1.01164	-0.420108	2.86861	3.58449	pink	turquoise	royalblue
TIE1	-4.35571	13.7737	0.000683264	-1.02765	-0.348818	6.45855	7.14678	black	green	blue
DIP2B	-0.598683	9.30001	0.56368	-0.188331	0.109201	4.01149	4.05106	red	lightcyan	green
SMARCD1	-9.48376	10.101	2.39211e-06	-1.09714	-0.680144	3.40439	4.29303	blue	turquoise	blue
KDM4A	-0.306486	10.7688	0.765079	-0.364814	0.275837	1.86076	1.90525	magenta	black	maroon
NFYC	7.10473	13.6947	5.99062e-06	0.476647	0.89011	2.51949	1.83612	yellow	blue	grey60
ASPM	-13.3029	11.099	3.63221e-08	-5.45223	-3.90565	-0.485239	4.1937	blue	turquoise	brown
ELOVL1	-0.449241	9.61345	0.663215	-0.566308	0.377127	4.10655	4.20114	green	yellow	greenyellow
ZNRD1	-1.52423	8.60426	0.163324	-0.991815	0.196645	0.789989	1.18757	turquoise	turquoise	violet
ZBTB11	0.964662	11.1493	0.355172	-0.164211	0.421214	2.65675	2.52824	grey	yellow	grey60
ATXN3	11.0132	13.0082	5.77208e-08	1.11307	1.65627	3.21688	1.83221	yellow	brown	black
GOLGA5	1.06539	8.65107	0.315531	-0.139671	0.385475	3.14834	3.02544	pink	darkturquoise	red
LRRC40	-4.13975	13.2211	0.00112404	-1.31862	-0.415294	1.35818	2.22514	cyan	yellow	brown
ISOC1	-5.49804	9.60143	0.000303298	-2.34146	-0.985534	-0.383578	1.27992	cyan	yellow	magenta
EML1	-5.40256	9.55807	0.000351014	-1.0854	-0.448709	2.81261	3.57966	blue	turquoise	blue
TRMT11	2.39928	13.8937	0.0310317	0.0486425	0.874098	0.66295	0.20158	red	pink	turquoise
THUMPD1	3.95307	13.5396	0.00153331	0.203583	0.68991	3.48498	3.03823	red	magenta	brown
MSANTD3	-13.1021	9.99283	1.28271e-07	-2.37468	-1.68434	0.918425	2.94794	turquoise	turquoise	turquoise
KIF26A	10.3746	12.4354	1.75082e-07	1.62642	2.48694	5.21368	3.157	lightgreen	brown	blue
ATG2B	5.56091	13.954	7.10282e-05	0.315355	0.711542	3.87277	3.35932	purple	blue	yellow
ARFGEF1	0.0980493	10.0739	0.923817	-0.223066	0.243623	4.066	4.05572	red	lightcyan	green
ZFAT	-1.81531	13.9618	0.0910108	-0.465004	0.0387472	1.07551	1.28863	black	green	turquoise
MTFR1	-9.94504	11.0207	7.69264e-07	-1.87656	-1.19658	0.903666	2.44024	turquoise	turquoise	brown
FECH	0.409588	7.12731	0.694139	-1.36266	1.93612	2.32739	2.04066	darkred	lightgreen	brown
MYO9A	13.7122	13.926	1.77342e-09	1.049	1.43823	4.19068	2.94706	purple	blue	midnightblue
DDX3Y	0.566345	13.9253	0.580173	-3.93136	6.75057	0.573806	-0.8358	skyblue	darkgrey	lightsteelblue1
PFKP	-6.33153	10.0753	8.27319e-05	-1.88252	-0.903189	4.71135	6.1042	green	turquoise	salmon
IDI1	-1.48705	13.4813	0.160012	-1.10822	0.202637	1.59669	2.04948	midnightblue	yellow	turquoise
SP100	5.74068	13.5141	5.86006e-05	0.382493	0.841242	4.43257	3.8207	brown	blue	white
KLF6	4.87896	13.9644	0.000245462	0.757179	1.9456	5.89519	4.54379	yellow	blue	thistle1
PLPP1	13.6188	13.7091	2.35702e-09	2.54871	3.5038	2.8505	-0.17575	tan	blue	green
NEO1	17.934	12.5055	2.69335e-10	4.50086	5.73941	0.519012	-4.60112	yellow	blue	green
TRAM1	2.2508	10.5906	0.046708	0.0100325	1.13651	4.58924	4.01597	greenyellow	pink	red
PHKA1	-7.35864	13.714	4.03364e-06	-1.4479	-0.793368	0.334224	1.45486	turquoise	turquoise	turquoise
TNFRSF1A	8.24713	13.2864	1.37803e-06	0.860697	1.46986	5.47672	4.31144	brown	blue	lightgreen
CACNB1	-2.4073	11.8284	0.0333462	-1.04645	-0.0512945	0.117635	0.666506	blue	turquoise	turquoise
EVI5	7.78155	9.84863	1.63983e-05	0.911109	1.64436	4.12156	2.84383	brown	blue	plum1
STOML1	1.45665	13.6502	0.167829	-0.114095	0.593528	1.29989	1.06017	green	red	turquoise
PKM	-10.3903	10.3426	8.4645e-07	-2.31796	-1.50238	6.00414	7.9143	blue	turquoise	pink
DHX29	-4.16479	13.7573	0.000988267	-0.847771	-0.270782	2.74553	3.3048	midnightblue	yellow	darkturquoise
DNTTIP2	-0.606968	12.9948	0.55433	-0.572939	0.321618	2.9767	3.10236	midnightblue	yellow	turquoise
METTL22	-4.80851	10.7048	0.000589382	-1.53208	-0.567708	0.763319	1.81321	lightcyan	red	red
TP53BP1	2.27668	13.8986	0.0391623	0.0139269	0.472283	4.25693	4.01383	orange	cyan	yellow
TRO	8.96769	13.7702	4.02553e-07	1.56028	2.54325	3.05187	1.00011	yellow	blue	darkgreen
RRP15	-1.54539	12.4361	0.147311	-0.855736	0.143933	1.35414	1.71004	midnightblue	tan	magenta
RHOA	-0.431227	12.1734	0.673841	-0.241901	0.161863	6.21483	6.25485	grey	yellow	pink
DHX8	-2.15873	8.53752	0.0608004	-0.409556	0.0112769	3.77787	3.97701	green	green	skyblue2
PRKCZ	10.2171	7.77036	8.92572e-06	5.30669	8.42104	1.90242	-4.96145	white	blue	greenyellow
IARS2	-5.7178	12.1497	9.18985e-05	-0.888027	-0.398467	3.43345	4.0767	cyan	yellow	darkorange2
SYT1	-9.95176	12.2633	3.14048e-07	-5.36376	-3.44071	-3.88087	0.52136	black	green	orange
NAV3	-14.1013	10.8904	2.44433e-08	-6.26237	-4.56959	-1.82535	3.59063	blue	turquoise	brown
IDH3G	-5.85726	12.503	6.57201e-05	-0.994677	-0.457054	2.18496	2.91082	turquoise	turquoise	cyan
ROGDI	-1.28554	9.71586	0.228399	-0.813325	0.219685	0.692384	0.989204	black	green	lightgreen
PDZD4	11.1482	9.26733	1.12352e-06	5.35704	8.0696	1.51362	-5.1997	brown	blue	skyblue
ROCK1	3.79782	9.07155	0.00417097	0.182653	0.719185	4.25277	3.80185	yellow	blue	turquoise
CBFB	-4.32916	13.8673	0.000708111	-1.43331	-0.483043	2.28957	3.24774	cyan	yellow	magenta
PDK3	4.80094	12.926	0.000351791	0.501054	1.32179	1.39203	0.480604	purple	blue	blue
HYAL2	5.23816	13.3806	0.000145625	0.766123	1.83637	7.39068	6.08943	brown	blue	pink
HDAC4	6.22741	10.2963	8.62496e-05	0.691195	1.45672	2.82975	1.7558	yellow	brown	midnightblue
RASSF1	2.33348	9.24219	0.0437848	0.0184394	1.05294	2.35269	1.817	grey	grey	turquoise
FGFR3	18.9228	13.4346	4.48814e-11	5.66893	7.12476	3.81496	-2.58189	brown	blue	pink
IFI35	12.16	13.5491	1.13465e-08	1.77017	2.53124	2.09455	-0.0561606	brown	blue	blue
HEATR6	-1.27747	10.34	0.229375	-0.539613	0.145223	1.60019	1.79739	green	turquoise	lightcyan
COASY	-6.32259	13.7832	2.02324e-05	-1.05046	-0.517711	2.56308	3.34717	turquoise	turquoise	green
PLEKHH3	5.18545	10.197	0.000384828	0.616756	1.54188	2.33967	1.26035	orange	brown	yellow
MEF2A	9.43136	8.23541	1.07763e-05	1.32718	2.18059	4.78669	3.03281	yellow	blue	greenyellow
OTUD5	0.951661	13.9579	0.357459	-0.120404	0.312379	3.27611	3.18012	salmon	purple	paleturquoise
TFE3	2.59125	9.8898	0.0271165	0.0583264	0.781931	3.4218	3.00167	tan	greenyellow	turquoise
TBC1D25	-0.278932	9.03756	0.786574	-0.349014	0.272349	1.47666	1.515	magenta	grey	yellow
ACSL4	-3.16513	13.249	0.00729945	-1.15394	-0.218776	3.57635	4.26271	midnightblue	yellow	turquoise
INPP5A	2.71245	9.89722	0.0220315	0.0559951	0.575314	2.63849	2.32283	salmon	brown	blue
GPKOW	-0.511852	11.4098	0.618516	-0.428216	0.266052	1.81416	1.89524	lightcyan	red	turquoise
GRIPAP1	2.71611	11.9599	0.0187909	0.0923344	0.842608	2.95328	2.48581	royalblue	purple	yellow
FTSJ1	-5.72767	11.7224	0.000103871	-1.23779	-0.554288	2.44445	3.34049	blue	turquoise	magenta
PRR11	-20.1445	9.99721	2.00812e-09	-5.52069	-4.42102	-1.58849	3.38237	blue	turquoise	brown
ATP11A	4.12604	10.1756	0.00198278	0.473752	1.58049	4.94379	3.91667	yellow	blue	tan
POLR1A	-5.19552	9.06529	0.000554402	-1.14203	-0.449729	3.54139	4.33727	green	turquoise	darkolivegreen
LAPTM4A	5.10319	12.9754	0.000203812	0.658567	1.62582	4.95655	3.81436	greenyellow	blue	sienna3
TTC7A	5.59106	9.58566	0.000269016	0.609501	1.4251	2.69071	1.6734	brown	blue	greenyellow
IP6K2	-5.91961	13.6711	4.12309e-05	-0.682551	-0.318889	2.86829	3.36901	turquoise	green	yellow
SRBD1	-0.165316	10.9942	0.871695	-0.318103	0.273659	1.62083	1.64305	green	tan	skyblue3
KIF2A	-4.17845	8.00643	0.00308068	-1.10251	-0.318431	2.6365	3.34697	turquoise	turquoise	orange
RASGRP2	5.40655	13.975	9.3092e-05	1.72002	3.98266	0.822816	-2.02852	yellow	brown	yellow
PSME4	-1.49141	8.06542	0.173891	-1.15822	0.247672	3.90948	4.36475	green	lightgreen	brown
IFT80	1.31056	12.9167	0.212831	-0.256168	1.04497	0.437821	0.0434204	grey60	pink	blue
SIRT2	-1.88513	12.7247	0.0824517	-0.384154	0.0265573	3.23039	3.40919	black	turquoise	darkorange
ERLEC1	5.24636	13.1422	0.000152289	0.479637	1.14993	3.53431	2.71953	brown	blue	darkgrey
PPP2R5B	11.5355	13.8575	1.72646e-08	1.85069	2.69708	4.33872	2.06484	brown	brown	green
MAST4	4.75449	13.4338	0.000344236	0.46525	1.23553	5.2538	4.40341	brown	brown	salmon
ADGRF5	-0.256185	13.1284	0.801778	-1.57103	1.23764	2.39601	2.56271	yellow	black	mediumpurple3
NUP133	-4.435	10.5707	0.00110475	-0.888571	-0.297181	3.12918	3.72206	green	yellow	brown
NUCKS1	-2.09073	11.3642	0.0597695	-0.785361	0.0186447	5.61783	6.00118	green	yellow	brown
VPS35	-5.41853	9.05007	0.000414657	-0.967033	-0.397741	3.88777	4.57016	cyan	turquoise	cyan
DNAJA2	-1.44839	8.46101	0.183531	-0.587577	0.131586	3.52975	3.75775	green	yellow	turquoise
BCL3	9.29014	12.2634	6.65855e-07	1.48513	2.39236	3.31955	1.38081	yellow	blue	lightgreen
KCNAB2	7.72456	13.6129	2.45274e-06	1.51905	2.69119	1.51324	-0.591886	yellow	brown	tan
GAL	-11.316	12.1544	8.18948e-08	-5.62446	-3.81041	-5.60476	-0.887322	turquoise	turquoise	brown
FUNDC1	-0.255917	8.60022	0.804031	-0.718514	0.573396	0.374927	0.447486	pink	darkgreen	yellow
RORA	4.57478	9.39059	0.00119849	0.4895	1.43527	3.09488	2.1325	greenyellow	magenta	red
TGFBR3	15.3581	13.5276	5.99871e-10	2.52603	3.34922	4.69571	1.75808	yellow	blue	black
HES2	-11.2635	8.69274	1.76376e-06	-7.79137	-5.17343	-3.7999	2.68249	turquoise	green	brown
ATP1B3	-6.05754	10.6384	9.45668e-05	-1.85274	-0.862177	2.76189	4.11935	pink	turquoise	turquoise
NEDD4	4.48816	10.5382	0.00102196	0.407026	1.1987	4.1072	3.30433	brown	magenta	yellow
PIGB	0.41058	10.099	0.689956	-0.447804	0.650448	0.214564	0.113242	grey60	tan	brown
MAPK6	-5.17875	13.7107	0.000149616	-1.20847	-0.499648	2.30697	3.16103	blue	yellow	brown
GNB5	9.60197	10.2391	1.92613e-06	0.79194	1.26857	2.25072	1.22047	yellow	blue	blue
RAB27A	8.92067	10.9381	2.3801e-06	1.67518	2.77357	2.66457	0.440188	tan	blue	greenyellow
HDHD5	-2.37606	9.61675	0.0398089	-0.811567	-0.0238795	2.09668	2.5144	turquoise	turquoise	red
UFD1	-2.55125	12.4457	0.0248128	-0.64504	-0.0520598	3.05183	3.40038	turquoise	turquoise	darkolivegreen
LRP6	11.1848	8.3889	2.49962e-06	1.16218	1.75978	5.12355	3.66257	brown	blue	coral1
PHRF1	-0.990623	8.89601	0.348047	-0.586798	0.229827	3.26213	3.44062	turquoise	red	bisque4
NUCB2	7.05248	11.062	2.05765e-05	0.69484	1.32467	3.84242	2.83266	yellow	magenta	brown
PFN2	-9.78776	9.1149	3.89414e-06	-2.09606	-1.31029	1.72919	3.43237	pink	turquoise	blue
SLC44A1	-0.505938	11.6184	0.622362	-0.400478	0.249985	4.04998	4.12522	magenta	lightcyan	green
TMEM260	2.4485	12.9875	0.029311	0.0342704	0.5486	1.72077	1.42933	magenta	brown	green
SMG6	3.62181	8.96483	0.00559221	0.199287	0.863482	3.34553	2.81414	salmon	brown	blue
EXOC5	-4.49005	13.6263	0.000542934	-1.32057	-0.4653	3.04857	3.9415	cyan	yellow	lightcyan
CLTCL1	-1.68397	10.062	0.122904	-0.746872	0.103582	0.227816	0.549461	turquoise	green	blue
FSTL3	-0.202176	13.0031	0.842908	-0.793351	0.657565	2.09	2.15789	green	turquoise	greenyellow
DGCR2	4.57025	13.8052	0.000451999	0.260401	0.722087	4.26143	3.77018	yellow	brown	plum2
RNF126	-7.84451	11.5741	5.75319e-06	-1.43573	-0.809551	2.0838	3.20644	blue	turquoise	thistle2
MNT	5.10517	10.0783	0.000449401	0.558294	1.42143	2.47521	1.48534	tan	brown	blue
ZXDC	6.0194	12.7127	4.73389e-05	0.516216	1.09627	2.99294	2.1867	brown	brown	saddlebrown
JMJD6	0.412489	7.60868	0.691358	-0.344336	0.492728	2.0493	1.9751	lightcyan	turquoise	turquoise
POLB	-0.324239	13.7993	0.75062	-0.363237	0.267948	0.896079	0.943724	black	turquoise	green
ST6GALNAC1	20.6671	9.07887	6.03847e-09	6.63817	8.26755	3.72582	-3.72704	brown	blue	pink
WIPI1	-2.56171	9.25128	0.0299686	-1.45014	-0.0930353	1.21063	1.98222	black	turquoise	darkseagreen4
GBA2	-6.78812	13.9584	8.89982e-06	-1.58099	-0.82164	3.94403	5.14534	green	green	salmon
NDST1	-8.52981	13.8495	6.96989e-07	-2.3138	-1.38324	4.20969	6.05821	turquoise	green	lightcyan
AP3M2	-1.68816	7.63648	0.131653	-0.557906	0.0885617	2.07853	2.3132	green	turquoise	coral1
PABPC1	2.98551	13.7264	0.0100087	0.252741	1.5509	6.95772	6.05589	tan	salmon	lightgreen
TESK2	3.08615	10.8023	0.0105658	0.267895	1.6106	0.280445	-0.658804	salmon	brown	lightyellow
CFAP20	-0.501925	9.10494	0.627633	-0.309161	0.196719	2.39577	2.45199	green	turquoise	thistle2
CSNK2A2	-2.21296	13.7747	0.044311	-0.518563	-0.00771459	3.74815	4.01129	pink	turquoise	darkgreen
PTPN21	3.14298	8.48841	0.0127595	0.110504	0.697319	2.14389	1.73998	magenta	brown	red
EIF2B3	-5.44634	10.486	0.000239005	-1.91172	-0.806588	0.94271	2.30187	blue	turquoise	magenta
TCOF1	-4.74998	12.675	0.00040653	-1.16626	-0.435742	2.94936	3.75036	blue	turquoise	purple
CDC42	-2.02944	8.21163	0.0760132	-1.0861	0.0668616	4.99887	5.50849	green	yellow	brown
OSBPL3	-9.88561	7.73224	1.17403e-05	-5.24093	-3.24859	-1.03365	3.21111	turquoise	turquoise	green
RAD18	-6.09011	13.8061	2.96267e-05	-1.6124	-0.771678	0.809586	2.00163	blue	yellow	brown
ATP2B1	7.31508	11.7121	1.06516e-05	1.13934	2.10972	4.1077	2.48317	brown	blue	brown
NCK2	-0.012638	11.2085	0.990139	-0.274294	0.271155	2.53121	2.53278	black	green	mediumpurple3
MAP4K4	-17.5874	10.8977	2.39976e-09	-2.29579	-1.78457	5.10001	7.14019	turquoise	turquoise	brown
MGAT4A	1.59389	13.9091	0.133425	-0.0945088	0.640083	4.24621	3.97342	yellow	pink	pink
RPL31	1.59186	7.8892	0.150611	-0.15147	0.821432	5.79597	5.46099	red	lightyellow	black
WDR1	-3.34108	13.9973	0.00485043	-0.657576	-0.143391	6.13417	6.53465	green	turquoise	salmon
SNX13	3.42394	13.2075	0.00443565	0.212294	0.935095	3.2972	2.72351	darkgreen	magenta	darkorange
ARHGAP10	1.18222	13.8382	0.257035	-0.157944	0.54497	2.19437	2.00086	green	grey	turquoise
RPS6KA2	7.84114	13.3113	2.3925e-06	0.985038	1.7318	6.13511	4.77669	yellow	brown	midnightblue
ING3	-1.19811	7.99375	0.265187	-1.58485	0.501176	0.779556	1.32139	grey60	lightcyan	green
VASH1	-1.75409	13.9661	0.10132	-1.11109	0.111464	4.20927	4.70909	lightyellow	green	midnightblue
LMCD1	25.1227	13.9485	5.16656e-13	4.13199	4.90366	5.017	0.499172	brown	blue	skyblue
BUD23	-2.07113	10.2357	0.0645241	-0.592425	0.0207137	2.44212	2.72798	green	turquoise	magenta
SEL1L	4.18016	11.2715	0.00145797	0.255194	0.81928	4.97644	4.4392	yellow	magenta	lightsteelblue1
TRIP13	-12.7946	9.6696	2.22621e-07	-5.60599	-3.93647	-1.72187	3.04935	blue	turquoise	brown
ATP6AP1	3.44979	13.9295	0.00393218	0.15075	0.646892	4.64927	4.25045	tan	brown	darkred
TCF3	-11.1489	12.8615	5.58343e-08	-1.58732	-1.07153	3.55551	4.88494	turquoise	turquoise	royalblue
TRIB2	17.5272	12.5202	3.4909e-10	2.63056	3.37351	4.2439	1.24187	yellow	blue	yellow
DAZAP1	-5.08245	9.20773	0.000615485	-1.3901	-0.535827	3.61972	4.58268	lightcyan	turquoise	magenta
MBD3	-4.62016	7.72813	0.00187236	-1.34907	-0.447068	3.10111	3.99918	lightcyan	turquoise	turquoise
HLTF	-0.778241	13.1828	0.45017	-0.547302	0.257114	2.47993	2.62502	green	lightcyan	steelblue
FAM50A	-7.89382	7.40391	7.35155e-05	-1.55395	-0.843615	2.22663	3.42541	turquoise	turquoise	turquoise
FAM3A	1.57883	11.6715	0.141078	-0.0770965	0.478289	2.01025	1.80965	royalblue	purple	midnightblue
CPSF1	-2.22431	10.3818	0.0493835	-0.836514	-0.00136142	3.98973	4.40867	turquoise	turquoise	orange
CYBRD1	12.0709	12.4008	3.21443e-08	2.31763	3.33413	5.0799	2.25402	yellow	blue	sienna3
PDCD2	-7.27479	12.0259	9.69004e-06	-1.22519	-0.660546	2.51419	3.45706	midnightblue	yellow	turquoise
RDH11	-1.3001	8.9391	0.226086	-0.889568	0.240673	3.13518	3.45963	midnightblue	yellow	turquoise
PRKACA	-0.793585	13.3322	0.441333	-0.488523	0.225552	3.13307	3.26456	pink	salmon	brown
ADGRL1	9.31049	13.4676	3.08088e-07	2.1904	3.50798	4.33094	1.48175	yellow	blue	darkorange
ACTN1	8.04589	10.9524	6.35802e-06	0.849353	1.48949	7.71753	6.54811	brown	blue	green
ZFYVE26	-0.641699	12.901	0.532305	-0.313737	0.170126	3.40281	3.47462	darkturquoise	midnightblue	green
RPS6KA6	3.98907	12.1326	0.00175935	0.600291	2.04146	-0.463628	-1.7845	greenyellow	blue	yellow
EPN2	2.42951	13.5773	0.0296499	0.04168	0.685669	3.12677	2.7631	tan	brown	red
PTPN18	1.32638	13.9287	0.206052	-0.187674	0.795228	1.99016	1.68639	lightgreen	salmon	blue
LIMS2	15.5003	12.3842	1.76479e-09	3.91206	5.18664	5.74117	1.19182	yellow	blue	white
SPEG	16.409	10.5563	7.48582e-09	5.45402	7.15387	4.19295	-2.111	brown	blue	honeydew1
LNX1	3.3103	12.5791	0.00586677	0.540635	2.59209	-0.56048	-2.12684	yellow	brown	blue
ALDH3A2	4.17453	12.5245	0.00117819	0.227243	0.718649	2.83051	2.35757	red	blue	black
TFRC	-8.5163	8.62413	1.7499e-05	-3.55023	-2.05214	2.71217	5.51336	turquoise	turquoise	magenta
SREBF1	0.962246	12.5647	0.35408	-0.212045	0.550489	3.96869	3.79947	red	purple	blue
AFF4	2.11529	7.40001	0.0700973	-0.0343089	0.68326	5.01169	4.68722	darkgreen	darkred	turquoise
UBE2D1	-1.50129	13.3138	0.156621	-0.822572	0.147106	0.842615	1.18035	pink	tan	brown
MPP5	0.102698	12.0393	0.919894	-0.384155	0.422175	2.32792	2.30891	grey60	yellow	magenta
RHOBTB1	-3.67277	13.9864	0.00251275	-0.837822	-0.220019	2.52281	3.05173	black	green	blue
SMC1A	-2.01681	13.1312	0.0646404	-0.645864	0.0218694	4.0028	4.3148	green	turquoise	darkturquoise
HSD17B10	-2.38249	8.84559	0.0415193	-0.818947	-0.020127	2.34869	2.76823	green	turquoise	brown
MARK2	0.361657	11.2021	0.724338	-0.251082	0.350079	2.69985	2.65035	magenta	salmon	turquoise
HMMR	-8.72176	9.00765	1.09699e-05	-5.95724	-3.50369	-2.63929	2.09117	blue	turquoise	brown
CHFR	-1.09414	7.94124	0.305968	-0.656246	0.234266	2.85845	3.06944	blue	red	blue
P4HA2	-3.80717	8.54504	0.00458824	-1.20243	-0.301509	2.47134	3.22331	turquoise	turquoise	mediumorchid
NFATC3	3.84609	8.8319	0.00407077	0.262627	1.01811	3.40144	2.76107	brown	blue	greenyellow
TRNT1	1.80192	13.6887	0.0936159	-0.0317438	0.360992	1.53054	1.36591	pink	tan	green
ACADVL	-2.07792	9.7275	0.0651956	-0.780645	0.0287164	5.13404	5.51	green	red	green
STK10	-3.00043	8.80797	0.0153069	-1.7305	-0.239944	2.30119	3.28641	turquoise	turquoise	salmon
FBXW11	3.53998	12.5458	0.00381559	0.0976853	0.406537	3.86491	3.61279	red	blue	turquoise
ACAP1	4.15705	11.6092	0.00142538	0.92779	2.98766	0.622502	-1.33522	purple	brown	red
CRMP1	2.06595	10.5749	0.0642235	-0.044804	1.31383	0.957101	0.322589	red	brown	purple
EVC	-0.972304	13.937	0.347473	-0.668741	0.251666	2.54363	2.75217	lightyellow	black	blue
DERL2	-1.62487	7.58679	0.144898	-0.818494	0.145601	1.91478	2.25122	cyan	yellow	turquoise
NDE1	-0.977078	13.0103	0.34635	-0.314218	0.118497	2.52661	2.62447	blue	turquoise	pink
MRVI1	16.4826	13.6149	2.19638e-10	5.05572	6.57291	3.49013	-2.32418	brown	brown	blue
TMEM38A	7.76519	13.5328	2.40038e-06	1.40946	2.49002	0.643892	-1.30585	tan	blue	greenyellow
AP1M1	-5.28614	13.9148	0.000117395	-0.952184	-0.402302	3.21788	3.89512	blue	turquoise	purple
PVR	-3.94811	10.8245	0.00235115	-1.47163	-0.416792	3.96071	4.90493	green	turquoise	turquoise
XRCC1	-0.166743	13.9405	0.869966	-0.304908	0.260935	2.05314	2.07513	black	turquoise	blue
SCARB1	-9.48859	13.9176	1.87317e-07	-2.27552	-1.43609	1.58535	3.44115	turquoise	turquoise	black
MCM2	-13.8082	13.9841	1.53596e-09	-3.92234	-2.86757	0.610757	4.00571	blue	turquoise	brown
MOV10L1	1.78674	13.9932	0.0956555	-0.0870448	0.955542	2.27003	1.83579	red	cyan	red
PANX2	-4.19522	9.16514	0.00223168	-3.44644	-1.03602	-3.32731	-1.08608	black	turquoise	lightpink4
SELENOO	-5.15709	9.59927	0.000486596	-1.17133	-0.461741	1.45653	2.27307	black	green	red
ALPK1	10.5451	11.1451	3.87196e-07	2.18795	3.33991	2.41879	-0.345146	brown	blue	blue
LLGL2	8.70823	13.9978	5.03926e-07	1.65147	2.73081	2.08291	-0.108228	brown	blue	pink
PDE8A	0.8072	9.81917	0.438666	-0.160652	0.342463	3.27722	3.18631	lightgreen	grey	black
CLCN4	0.403426	13.9981	0.69273	-0.419816	0.614333	2.43357	2.33631	green	tan	saddlebrown
NLE1	-4.71827	9.59072	0.000917608	-1.50266	-0.534869	1.52606	2.54483	blue	turquoise	yellowgreen
SDHA	-6.86836	13.8396	8.18832e-06	-1.07507	-0.562992	3.69564	4.51467	blue	turquoise	lavenderblush3
SMARCE1	-2.10248	9.85526	0.0622196	-1.15566	0.034683	0.968835	1.52932	pink	yellow	blue
GSDMB	4.05007	12.0441	0.00159847	0.382238	1.27158	0.693725	-0.133183	brown	brown	green
KDM5A	3.63365	11.8748	0.00348424	0.11101	0.44449	4.56429	4.28654	purple	brown	red
PPP2R3A	-2.47815	13.2317	0.0274252	-0.926807	-0.0643143	1.75603	2.25159	black	green	midnightblue
FERMT2	0.421991	10.0918	0.68188	-0.272751	0.400398	4.60501	4.54119	green	yellow	turquoise
PTGS2	20.1792	9.5762	3.61321e-09	5.47279	6.8406	7.65935	1.50265	brown	blue	yellow4
IGF2BP2	-3.80103	10.1909	0.0033641	-1.19543	-0.313278	3.59582	4.35017	blue	turquoise	steelblue
MAP3K13	8.05066	11.1735	5.57083e-06	0.810325	1.41852	2.0915	0.977076	brown	blue	bisque4
ST6GAL1	9.54689	8.22837	9.88066e-06	1.16259	1.89839	6.56282	5.03233	yellow	blue	darkseagreen4
FRY	10.0497	12.4332	2.50431e-07	1.30131	2.01823	5.26633	3.60656	brown	blue	green
PICALM	4.23911	8.8565	0.00225746	0.438741	1.44816	5.63945	4.696	brown	blue	turquoise
NSF	-1.16624	12.4106	0.265439	-0.346638	0.104352	2.24085	2.36199	turquoise	yellow	pink
CLASP1	5.13984	11.9117	0.0002509	0.294947	0.729629	4.50626	3.99397	brown	brown	red
MRPS34	-9.08867	11.3692	1.49218e-06	-1.79285	-1.09602	1.47321	2.91765	turquoise	turquoise	turquoise
NOTCH3	8.4561	13.9572	7.29966e-07	3.26918	5.49199	4.7743	0.39371	yellow	brown	coral1
CLNS1A	-1.51771	12.6683	0.15364	-0.380868	0.0670394	3.50361	3.66052	green	yellow	blue
TEAD2	-5.98024	13.3991	4.04641e-05	-1.14973	-0.540852	3.33978	4.18508	turquoise	green	brown
EED	-4.43812	13.2955	0.000634475	-1.29573	-0.448565	0.234771	1.10692	cyan	yellow	darkturquoise
TSG101	2.55963	8.44946	0.0322402	0.0540281	0.952457	3.15348	2.65024	greenyellow	blue	lightyellow
NCBP3	2.29988	12.4743	0.0394441	0.00675093	0.231714	3.68186	3.56263	purple	purple	skyblue
ATP2A3	16.6264	13.2988	2.77047e-10	6.96337	9.03776	4.23587	-3.7647	brown	blue	greenyellow
CA12	6.33503	11.212	5.10053e-05	1.2125	2.49904	0.430512	-1.42526	purple	blue	purple
MGLL	-11.2047	11.4884	1.56479e-07	-2.9257	-1.96915	2.37773	4.82515	blue	turquoise	yellowgreen
NTN4	-5.11219	10.0874	0.00044353	-2.99498	-1.17823	2.2203	4.30691	black	turquoise	red
BCS1L	-3.56267	13.55	0.00326994	-1.27172	-0.314066	1.55474	2.34763	green	turquoise	magenta
NUAK1	9.61779	11.8965	5.8425e-07	1.54247	2.44716	5.53207	3.53725	yellow	brown	midnightblue
DPP8	0.736185	9.03146	0.480302	-0.301695	0.593021	3.31592	3.17025	darkgreen	pink	blue
SLC24A1	8.6645	12.1726	1.48639e-06	0.7469	1.24768	2.54413	1.54684	purple	brown	cyan
ZNF532	4.14534	11.3648	0.00152114	0.267838	0.869191	3.70589	3.13738	yellow	brown	salmon
SCARF1	-0.629286	8.70446	0.545321	-0.513167	0.290704	4.57123	4.68247	red	black	brown
LMAN1	-0.993453	12.7134	0.339022	-0.503062	0.186631	4.67708	4.8353	midnightblue	yellow	darkgrey
HACD3	-4.55131	10.7522	0.000877765	-1.08354	-0.375816	3.81126	4.54094	midnightblue	yellow	turquoise
IPCEF1	11.4095	13.5757	2.45282e-08	5.35116	7.83772	0.582959	-6.01149	yellow	blue	green
ZZEF1	2.23401	9.53011	0.0507656	-0.00132462	0.650849	4.49083	4.16606	red	greenyellow	green
ENO1	-9.99161	9.63054	2.14903e-06	-2.58426	-1.63782	6.27695	8.38799	green	turquoise	royalblue
MYDGF	-6.04784	13.957	3.03795e-05	-1.19034	-0.566958	2.84332	3.72197	turquoise	turquoise	royalblue
ANO8	2.34125	12.9772	0.0358362	0.051707	1.28968	1.31317	0.642481	salmon	brown	darkred
TUBE1	4.03434	13.743	0.0012744	0.318514	1.04431	1.58328	0.901871	red	blue	grey60
ARHGEF10L	3.05492	11.71	0.0102502	0.281741	1.69663	1.99291	1.00373	lightgreen	brown	blue
ACTR6	0.59547	13.8685	0.561122	-0.491629	0.869072	0.797811	0.609089	grey60	pink	brown
TIPIN	-7.02715	11.9819	1.39206e-05	-2.06803	-1.08901	-1.03765	0.54087	blue	turquoise	purple
SRI	-6.56854	9.06051	9.98338e-05	-1.21407	-0.592526	2.69368	3.59698	turquoise	turquoise	brown
EIF4G3	-2.33644	12.7409	0.0364921	-0.430582	-0.0164147	4.12774	4.35124	pink	turquoise	green
NUP37	-4.71834	9.16626	0.00103837	-1.62865	-0.575033	0.844147	1.94599	blue	yellow	brown
SEMA3A	-3.90039	12.3866	0.00199056	-2.614	-0.744416	-2.33187	-0.652668	grey	green	brown
GTSE1	-16.3507	12.7028	6.57804e-10	-4.73009	-3.6237	-2.03022	2.14667	blue	turquoise	brown
TTC38	-3.7448	7.9965	0.00567069	-1.07488	-0.255552	1.63172	2.29693	turquoise	red	lavenderblush3
ACAT1	-6.05794	9.13121	0.000177832	-1.49691	-0.684213	1.88403	2.97459	cyan	yellow	pink
GRAMD4	5.43909	13.7484	9.30114e-05	0.651968	1.50332	2.69358	1.61594	salmon	brown	black
CELSR1	12.7438	11.9325	2.62417e-08	4.05468	5.72834	5.19615	0.304637	yellow	blue	green
ZNF638	3.76029	13.9984	0.00211043	0.117577	0.429782	4.69505	4.42137	purple	brown	green
SLC25A40	0.269746	12.7398	0.791676	-0.330954	0.425168	0.963928	0.916821	grey60	tan	red
TIMM21	-6.45159	13.9891	1.52428e-05	-1.34482	-0.673724	0.530917	1.54019	blue	turquoise	brown
RASAL2	0.31896	13.9974	0.754467	-0.237873	0.320981	3.4307	3.38915	skyblue	cyan	orange
VPS9D1	1.99501	12.664	0.0680193	-0.0433729	1.0542	2.04767	1.54225	salmon	purple	darkred
ZNF37A	2.81337	9.72573	0.0188436	0.0882019	0.772387	2.30585	1.87555	greenyellow	pink	grey60
MARK3	-2.14601	8.47954	0.0622636	-0.582003	0.018065	3.71923	4.00119	green	turquoise	turquoise
SLC25A3	-5.49984	8.45451	0.000473497	-1.22488	-0.505915	5.63311	6.49851	green	turquoise	blue
FNDC3B	3.63165	11.7745	0.00354357	0.150361	0.603758	5.94233	5.56528	brown	blue	red
FOSL2	14.7676	8.49212	2.37502e-07	2.28283	3.1177	7.07992	4.37966	brown	blue	turquoise
FRYL	5.62875	13.8425	6.49127e-05	0.35673	0.796708	4.75934	4.18262	purple	brown	grey
TMEM131	3.20785	9.92341	0.00945602	0.132537	0.737463	3.45452	3.01952	tan	greenyellow	pink
FSCN1	-9.84589	12.0779	4.01245e-07	-1.86734	-1.19103	4.61594	6.14512	black	green	blue
ACTB	-2.25764	13.7512	0.0407824	-0.763855	-0.0189327	8.75262	9.14402	green	salmon	blue
MOCOS	7.65213	10.169	1.57441e-05	1.63105	2.96685	0.0927722	-2.20618	yellow	blue	plum1
PLD1	-1.89657	13.7999	0.0790146	-0.839253	0.0521144	3.92937	4.32294	lightyellow	black	brown
WDR62	-13.3735	13.1832	4.77164e-09	-4.61355	-3.33185	-2.21441	1.75829	blue	turquoise	purple
DLG1	-1.59339	13.9961	0.133399	-0.539004	0.0795119	3.58777	3.81752	pink	tan	coral2
RAB7A	1.79389	13.9326	0.0945553	-0.108096	1.21026	4.31826	3.76718	tan	salmon	turquoise
BCAP29	-2.72468	8.75329	0.0240134	-1.31902	-0.119523	2.74822	3.46749	pink	yellow	turquoise
SEC31B	0.0266986	13.9898	0.979077	-0.625771	0.641545	1.47384	1.46595	darkorange	purple	yellow
SART3	-2.94094	8.67844	0.0171091	-0.603926	-0.0771058	3.12274	3.46326	lightcyan	turquoise	turquoise
EXOSC7	-4.25891	13.7011	0.000831844	-0.948175	-0.312166	1.46839	2.09856	blue	turquoise	lavenderblush3
KIFAP3	4.40891	11.3114	0.000980142	0.292467	0.871676	2.40013	1.81806	greenyellow	blue	black
MKRN2	-2.94539	8.96187	0.0164166	-0.649872	-0.0850559	2.40999	2.77745	turquoise	yellow	blue
MCM6	-6.92634	13.2565	9.40145e-06	-1.83316	-0.962795	1.87478	3.27276	blue	turquoise	brown
REXO2	-3.68179	8.31202	0.00580425	-1.71812	-0.400063	2.57569	3.63478	midnightblue	yellow	turquoise
RBM7	1.12277	10.9067	0.285641	-0.28759	0.885267	1.41172	1.11288	greenyellow	pink	turquoise
RBMS2	10.014	8.54846	5.19054e-06	1.102	1.75192	5.67475	4.24779	brown	blue	green
BAZ2A	2.14894	12.5159	0.0518376	-0.00359046	0.77691	4.7254	4.33874	tan	greenyellow	yellow
PTPN23	0.503931	10.2006	0.625015	-0.363797	0.577182	2.99103	2.88434	tan	midnightblue	darkorange2
MLH1	0.177686	13.7358	0.861563	-0.237241	0.280016	2.67257	2.65118	green	turquoise	purple
UNG	-4.8184	13.5332	0.000299963	-1.12022	-0.428577	2.10092	2.87532	blue	yellow	black
KLHL20	7.43234	11.5001	1.01279e-05	0.924877	1.6973	3.47785	2.16676	yellow	blue	midnightblue
RGS11	7.49188	11.1307	1.13252e-05	1.90218	3.48158	3.10726	0.415377	brown	brown	cyan
SLC46A1	5.13799	13.1011	0.000186006	0.842791	2.06409	-0.53339	-1.98683	tan	blue	turquoise
PLXNA2	0.607567	9.31867	0.557988	-0.317295	0.551982	6.67783	6.56048	red	midnightblue	darkgrey
SPAG5	-12.0983	11.0444	1.02759e-07	-4.29605	-2.97408	-0.279448	3.35562	blue	turquoise	brown
ANKRD13A	2.6625	9.66524	0.0244588	0.0576911	0.667101	3.16709	2.80469	darkred	lightgreen	yellow
TPD52	7.41701	13.924	3.37439e-06	2.15778	3.91465	1.82858	-1.20763	yellow	blue	blue
ACACB	12.5104	13.9499	5.70011e-09	3.69578	5.22581	3.04614	-1.41465	brown	blue	blue
TRAF4	-9.89338	13.0172	2.01419e-07	-1.37172	-0.880072	2.04214	3.16803	turquoise	green	turquoise
PAG1	10.013	11.0168	7.20681e-07	5.03621	7.87336	1.08375	-5.37103	yellow	blue	greenyellow
GPATCH1	4.77892	9.00333	0.00100175	0.382096	1.0689	0.894109	0.168608	brown	blue	brown
NT5C2	4.00134	9.7381	0.00264956	0.249273	0.880923	2.3703	1.8052	tan	blue	thistle2
MCAM	-6.98709	9.86189	4.05095e-05	-1.76701	-0.911295	7.15924	8.49839	green	turquoise	palevioletred3
MBNL3	1.45018	7.37241	0.188182	-0.724175	3.08297	1.33471	0.155313	darkred	lightgreen	brown
XAB2	-0.885464	11.1806	0.394552	-0.407952	0.17355	3.06381	3.18101	darkturquoise	red	skyblue2
ARHGEF1	0.729411	9.49697	0.483351	-0.20072	0.394019	3.92367	3.82702	lightgreen	purple	salmon
STXBP2	-0.136598	12.3262	0.893554	-0.999267	0.881038	0.838816	0.897931	black	green	magenta
MAP2K7	0.0375018	8.72296	0.970929	-0.437451	0.452127	1.85982	1.85249	magenta	salmon	turquoise
DGKD	4.09108	9.35541	0.00250051	0.359338	1.23688	2.74523	1.94712	brown	brown	blue
CTTNBP2	4.31201	9.25451	0.00183322	1.62705	5.18676	-0.366844	-3.77375	yellow	blue	mediumpurple3
RARB	-1.72092	12.7493	0.109425	-0.677384	0.0773649	2.73028	3.03029	black	turquoise	yellow
TOP2B	-3.8334	12.4173	0.00224276	-0.522995	-0.144829	4.42613	4.76004	blue	yellow	brown
TM9SF3	1.73884	13.8156	0.104286	-0.110657	1.05239	5.2951	4.82423	darkgreen	pink	turquoise
NFKB2	6.0569	13.3438	3.62566e-05	1.05053	2.2107	3.7444	2.11379	yellow	blue	turquoise
UBE2T	-7.69291	8.33907	4.6132e-05	-4.91392	-2.65966	-2.02055	1.76624	blue	yellow	brown
DNAJC10	-1.72413	13.617	0.1073	-0.563634	0.0620185	4.9847	5.23551	midnightblue	yellow	antiquewhite4
GTF3C1	-2.10284	10.0327	0.0616924	-0.60522	0.0173756	4.42609	4.72001	darkturquoise	red	turquoise
IL4R	4.71872	10.7382	0.000673521	0.4588	1.26546	4.76912	3.90699	brown	brown	blue
USP33	1.41708	12.2163	0.181456	-0.136525	0.647349	3.42537	3.16996	darkgreen	pink	black
SNRPA	-15.7036	12.8991	8.71571e-10	-1.92795	-1.46131	1.62865	3.32329	turquoise	turquoise	purple
EXOSC5	-2.66741	12.7491	0.0196289	-1.17757	-0.122509	0.143793	0.79383	blue	turquoise	turquoise
DYNC1I2	-5.15913	11.7598	0.000253269	-0.723557	-0.293189	3.32445	3.83282	blue	turquoise	brown
LRCH4	-2.14108	9.92826	0.0581231	-0.944409	0.0192805	0.712723	1.17529	black	green	turquoise
FAM76B	1.64156	13.1443	0.124378	-0.134059	0.986373	1.3761	0.949946	greenyellow	pink	yellow
SIRT6	-1.98411	9.93249	0.0755502	-0.712274	0.0415914	1.05999	1.39533	turquoise	red	brown
POLD3	-2.94268	12.6202	0.0117459	-0.767761	-0.116551	1.52753	1.96969	blue	yellow	turquoise
CAPZB	1.28913	11.2516	0.223225	-0.222553	0.855981	3.94887	3.63216	tan	salmon	blue
GPR137B	2.90825	13.7637	0.0116214	0.12912	0.859067	1.02287	0.528773	magenta	brown	darkred
JADE1	0.84352	10.4594	0.417811	-0.214472	0.478301	2.81205	2.68013	green	yellow	grey60
SLC25A43	-4.02797	8.17812	0.0036301	-0.755004	-0.206579	1.27493	1.75573	cyan	yellow	blue
UBE2A	-2.12452	12.5756	0.0540715	-0.566488	0.00571265	2.17553	2.45592	pink	yellow	brown
FGFR1	1.55634	10.3502	0.149652	-0.101195	0.577279	5.36381	5.12577	lightgreen	brown	cyan
FBLN1	5.57981	12.4854	0.000103599	2.67616	6.08096	0.43724	-3.94132	yellow	blue	blue
MAP2	-0.0813511	8.77652	0.936988	-0.829426	0.772057	1.34802	1.37671	grey	yellow	blue
PIAS2	6.31382	12.0434	3.80433e-05	0.350852	0.720367	2.50057	1.96496	brown	blue	red
AMPH	-0.691783	8.36152	0.507825	-3.22138	1.72602	-0.819292	-0.0716131	pink	turquoise	saddlebrown
ARAF	2.89864	10.6971	0.014869	0.0926149	0.685492	3.35057	2.96152	yellow	greenyellow	grey60
MCCC1	-1.10264	11.9536	0.291886	-0.627036	0.205759	1.68178	1.89242	blue	turquoise	sienna3
LAMP3	-1.35352	8.38084	0.211263	-3.93077	1.00863	-2.52225	-1.06118	black	turquoise	turquoise
FAP	3.87982	12.2696	0.0021029	1.24643	4.42186	-0.561651	-3.3958	yellow	brown	skyblue3
ACER3	-2.3402	9.59692	0.0423347	-0.836254	-0.0181287	2.3453	2.77249	turquoise	tan	brown
UBE2K	0.0708463	11.5307	0.944734	-0.513616	0.547979	2.6917	2.67451	pink	tan	magenta
PIK3C3	7.29831	13.9337	4.02959e-06	0.488976	0.896235	3.49699	2.80438	yellow	grey60	black
N4BP2	3.94834	13.8437	0.00148631	0.334366	1.13147	2.05173	1.31881	darkgreen	blue	darkmagenta
TIGAR	-12.4434	9.24673	4.39127e-07	-2.45205	-1.70024	-0.0319523	2.04419	turquoise	turquoise	darkturquoise
TULP3	1.61909	12.9791	0.12946	-0.0603349	0.421051	2.71738	2.53702	skyblue	darkgrey	lightcyan
SYNJ2	-8.58206	8.49766	1.80795e-05	-1.73994	-1.00881	3.7976	5.17198	turquoise	turquoise	greenyellow
PPP2R5C	3.62239	7.73493	0.00715551	0.148319	0.676627	3.94649	3.53402	brown	magenta	black
PMS2P1	0.749728	12.0689	0.467782	-0.299057	0.613144	-0.376906	-0.53395	grey	grey	blue
GNB1	-0.976264	11.9639	0.348262	-0.523808	0.199723	5.60591	5.76796	turquoise	salmon	thistle1
HOXA9	-5.10051	9.27603	0.000586687	-1.44169	-0.558555	1.20542	2.20555	pink	turquoise	turquoise
EDN1	6.55933	13.1973	1.69754e-05	1.05634	2.09154	7.07317	5.49923	red	blue	red
MLLT10	3.46715	8.75223	0.00738655	0.107128	0.514411	2.88852	2.57775	greenyellow	darkred	turquoise
ITM2A	8.15209	12.4061	2.48624e-06	3.58658	6.19016	1.43671	-3.45167	yellow	blue	violet
NRDC	-1.83505	11.9484	0.0915013	-0.427688	0.0367304	3.87439	4.06987	turquoise	turquoise	darkmagenta
VDAC3	-7.81808	9.95266	1.48047e-05	-1.61508	-0.898307	2.81442	4.07112	blue	turquoise	darkturquoise
PCM1	5.51461	11.9199	0.000136364	0.246618	0.569179	5.16716	4.75926	purple	blue	pink
TNRC6C	7.14182	9.06307	5.22424e-05	0.988506	1.9036	3.43256	1.9865	brown	greenyellow	midnightblue
CBFA2T2	5.9916	13.0721	4.40401e-05	0.856406	1.82139	2.33058	0.991681	tan	brown	darkred
ITCH	0.9471	8.72666	0.369073	-0.185403	0.450271	4.23577	4.10334	red	pink	red
TP53INP2	0.61171	13.8378	0.550648	-0.357331	0.642048	2.16959	2.02723	magenta	brown	blue
SDF4	0.866397	8.18314	0.410955	-0.252032	0.55729	5.07915	4.92652	salmon	black	saddlebrown
TOLLIP	-0.0658403	10.4514	0.948747	-0.475503	0.448053	2.54691	2.56063	magenta	midnightblue	yellow
UBE2D4	2.77849	10.8978	0.0180958	0.0851432	0.737737	0.9213	0.50986	tan	grey	brown
RUNX1T1	7.09892	12.9246	8.32638e-06	1.5419	2.89206	4.53039	2.3134	brown	blue	ivory
THOC1	-2.90147	13.9978	0.0116098	-0.718697	-0.107763	1.77389	2.18712	blue	turquoise	darkolivegreen
FKBP7	1.33522	13.6052	0.203716	-0.1704	0.728447	1.67239	1.39336	salmon	grey60	paleturquoise
OSBPL6	-3.76641	8.82983	0.00459568	-2.99922	-0.74423	-1.55464	0.317084	black	green	brown
XRCC5	-7.03543	11.9099	1.42125e-05	-1.15547	-0.608672	5.5541	6.43618	green	yellow	brown
LXN	-3.22113	9.99546	0.00916281	-1.31533	-0.239647	2.44975	3.22724	blue	turquoise	salmon
MKNK1	2.23366	12.5228	0.0444388	0.0105655	0.716836	1.95229	1.58859	grey	grey	blue
TNS1	18.379	10.1984	3.76008e-09	2.81155	3.58498	7.25423	4.05596	brown	blue	pink
REXO1	0.571597	8.79507	0.581906	-0.390986	0.654125	2.60657	2.475	magenta	midnightblue	turquoise
SAR1A	1.36564	13.7307	0.194007	-0.11416	0.512327	4.53258	4.3335	red	pink	darkgrey
CDC14A	-3.2145	12.1769	0.00730428	-1.39685	-0.26932	0.498737	1.33182	blue	turquoise	salmon
RAPGEF3	0.999127	8.34157	0.345831	-0.343812	0.876165	3.41416	3.14798	red	purple	turquoise
SENP1	1.56528	11.1093	0.145539	-0.0796183	0.473337	2.43503	2.23817	green	tan	turquoise
CIC	2.5889	13.9	0.0215316	0.0954827	1.02136	4.54389	3.98547	salmon	purple	yellow
LIPE	-1.50435	9.32823	0.165573	-0.897896	0.178347	-0.585192	-0.225417	turquoise	red	coral2
FDFT1	-3.95466	12.051	0.00189647	-1.4081	-0.407996	2.8967	3.80475	blue	turquoise	green
PAFAH1B3	-5.74492	10.4088	0.000159949	-1.15989	-0.514086	0.909025	1.74601	black	green	sienna3
OPHN1	11.0332	13.9929	2.74191e-08	1.82573	2.70689	3.32723	1.06091	yellow	blue	tan
KIF22	-10.1023	13.8814	8.89374e-08	-2.53744	-1.6481	1.27069	3.36346	blue	turquoise	brown
CARMIL1	10.4634	12.8516	1.179e-07	2.58944	3.93893	4.53988	1.2757	yellow	blue	yellow
PGM1	0.605835	13.8968	0.554391	-0.367003	0.655676	2.14146	1.99712	magenta	black	orange
DDX1	-2.22321	13.2875	0.0441365	-0.825303	-0.0127384	3.4523	3.87132	pink	tan	turquoise
DNM2	-1.21973	13.59	0.243313	-0.438496	0.121136	4.50528	4.66396	blue	turquoise	brown
EPB41L2	-2.83663	13.7387	0.0133937	-0.997461	-0.137659	2.98401	3.55157	blue	turquoise	brown
STX7	6.62353	13.861	1.20291e-05	0.693362	1.35836	3.84789	2.82203	greenyellow	blue	yellow
RABL2B	-2.69346	12.2465	0.0192485	-1.02096	-0.108967	-0.0794903	0.485473	turquoise	green	red
KEAP1	-0.930113	11.315	0.371732	-0.383115	0.154958	3.30925	3.42333	turquoise	turquoise	green
SLC35C2	4.72831	13.9939	0.00032379	0.194445	0.517316	3.0106	2.65472	purple	brown	darkred
CRYBG3	5.20787	13.1525	0.00016248	0.328684	0.793753	3.72594	3.16472	brown	magenta	green
RFX3	5.06896	13.1535	0.000207491	0.524869	1.30296	1.41487	0.500952	tan	brown	darkorange
RIF1	-2.25868	13.9146	0.0404941	-0.757333	-0.0193703	3.96321	4.35157	midnightblue	yellow	turquoise
RAB21	5.00392	12.2255	0.000290456	0.558901	1.41787	3.4699	2.48151	darkgreen	magenta	turquoise
SMARCA2	10.3149	9.60182	1.65896e-06	0.750313	1.16676	4.76918	3.81064	yellow	blue	green
SESN1	-9.26729	13.3763	3.43723e-07	-1.52683	-0.950877	0.532668	1.77152	black	green	cyan
MID2	0.226001	11.1899	0.825275	-0.286174	0.35182	2.07338	2.04056	black	yellow	yellow
SRCAP	0.895311	7.79103	0.397437	-0.406751	0.919122	0.704399	0.448214	tan	midnightblue	turquoise
PUM3	-6.31311	12.6312	3.06587e-05	-1.57138	-0.768337	2.26999	3.43985	green	turquoise	magenta
CNOT4	1.69341	8.49338	0.126635	-0.130983	0.883533	2.20355	1.82727	greenyellow	darkred	turquoise
PSEN1	7.31325	12.6431	6.91122e-06	0.592244	1.09088	3.90339	3.06183	yellow	blue	lightgreen
CPOX	1.69394	10.6762	0.119211	-0.112873	0.855078	2.46181	2.0907	magenta	grey	green
CLDND1	3.51156	8.30485	0.00748719	0.255778	1.2164	3.6872	2.95112	darkgreen	pink	red
MOK	3.06231	10.9772	0.0108315	0.219388	1.34163	0.0501993	-0.730308	brown	brown	brown
HSP90AA1	-6.45049	9.08652	0.000113139	-0.994869	-0.478806	5.54602	6.28285	blue	turquoise	darkturquoise
RBL1	-5.28613	10.9206	0.000264169	-2.19955	-0.90554	0.441752	1.9943	blue	yellow	brown
DLGAP4	2.65285	13.7832	0.0191225	0.15665	1.48951	3.29843	2.47535	tan	greenyellow	cyan
IGSF9B	15.1643	13.818	5.27905e-10	6.88008	9.15015	2.53748	-5.47764	brown	blue	greenyellow
CROCCP3	1.62049	8.32008	0.142331	-0.251034	1.46507	0.592744	-0.0142755	red	purple	yellow
NDC80	-11.8248	11.5062	8.6878e-08	-4.96691	-3.41508	-2.04035	2.15064	blue	turquoise	brown
AP4E1	0.22816	10.6527	0.823842	-0.353848	0.435332	1.31361	1.27287	pink	yellow	turquoise
RSBN1	6.99536	13.7659	6.89927e-06	0.599253	1.13042	2.25942	1.39458	tan	blue	yellow
MAGI3	-1.12565	7.90212	0.293335	-0.312015	0.107617	2.00035	2.10255	blue	yellow	blue
TCF7	2.81265	7.7964	0.023342	0.213428	2.20656	0.716068	-0.493925	lightgreen	brown	blue
OSTM1	7.56702	13.9979	2.60368e-06	1.25587	2.24941	2.89282	1.14018	greenyellow	blue	yellow
PCNP	2.65871	13.2294	0.0194445	0.104447	1.00158	3.09151	2.5385	greenyellow	pink	darkmagenta
EXD2	-2.08107	13.9416	0.056348	-0.418395	0.00639039	2.26347	2.46947	turquoise	turquoise	blue
ARG2	-7.69706	9.15404	2.73469e-05	-3.70962	-2.02773	-1.40484	1.46383	turquoise	turquoise	turquoise
MEF2C	2.89001	8.69828	0.0185162	0.121811	1.02147	3.44507	2.87343	greenyellow	blue	coral2
UBA5	1.15847	11.3557	0.270456	-0.203532	0.659538	2.08014	1.85214	grey60	tan	white
STK17B	1.6696	7.65622	0.135244	-0.319621	1.95016	2.15774	1.34247	brown	lightgreen	blue
ZNF510	0.848512	9.73881	0.416521	-0.252589	0.561469	1.52733	1.37289	tan	magenta	darkorange
ZNF506	23.3402	13.9996	1.31373e-12	3.5897	4.3162	2.16103	-1.79192	brown	blue	violet
JMJD4	-4.3652	7.61404	0.00269565	-1.74341	-0.531147	-0.087172	1.05011	black	green	red
DUSP12	-4.53503	13.7586	0.00048717	-1.20157	-0.429095	0.773994	1.58933	turquoise	turquoise	royalblue
AACS	-5.95698	9.93774	0.000143503	-1.5543	-0.707558	1.39707	2.528	turquoise	green	midnightblue
KIAA0141	8.36541	11.5408	3.09133e-06	0.476101	0.813462	4.52379	3.87901	purple	brown	black
CADPS2	5.11508	11.7781	0.00027082	0.521052	1.29715	3.85979	2.95069	brown	blue	black
HSPB11	-2.37935	13.563	0.032629	-1.09579	-0.05516	-0.0911662	0.484311	cyan	yellow	brown
PHLPP1	3.85118	12.3308	0.00219704	0.275427	0.98821	1.73421	1.10239	tan	blue	yellow
ATP8B1	-2.63359	11.8334	0.0220497	-1.40886	-0.132047	3.41715	4.1876	black	green	blue
SMARCD3	7.00584	10.0638	3.57124e-05	0.833731	1.61039	1.92707	0.705008	brown	brown	skyblue
WDR70	-1.56562	11.7733	0.143906	-0.350202	0.0577136	2.27394	2.42018	green	green	blue
MPP4	-10.259	8.8961	3.1616e-06	-7.17901	-4.58121	-4.54478	1.33532	turquoise	turquoise	lightcyan
STRADB	-0.534026	7.06411	0.60971	-2.62716	1.65769	0.326537	0.811272	darkred	lightgreen	salmon4
BZW1	-5.51386	12.1832	0.00012616	-1.37194	-0.595711	4.13626	5.12008	green	yellow	brown
ME2	-8.81968	9.05168	9.69912e-06	-1.56315	-0.925414	2.19676	3.44105	turquoise	yellow	brown4
C5orf22	-1.74684	7.35613	0.12209	-1.30622	0.190023	1.2983	1.8564	grey60	tan	blue
CCNT2	-1.15948	8.38686	0.278205	-0.732586	0.239756	2.56799	2.81441	pink	lightcyan	turquoise
FAM135A	1.71192	8.2552	0.124103	-0.195408	1.3455	1.81152	1.23648	greenyellow	pink	yellow
EPB41L3	8.16506	13.6628	1.27496e-06	0.875814	1.50182	6.12189	4.93308	brown	blue	plum1
COBLL1	5.54078	8.33374	0.000473702	0.74662	1.79855	3.70755	2.43496	brown	blue	green
DLG3	6.77056	10.8018	3.3625e-05	0.871646	1.71412	0.528666	-0.764216	brown	brown	brown
SERTAD4	7.93108	13.5277	1.89713e-06	1.89885	3.31288	2.31183	-0.294029	greenyellow	blue	darkgreen
TRAF5	1.72757	12.9491	0.107823	-0.0677009	0.607097	1.67078	1.40109	royalblue	cyan	paleturquoise
MRPL22	-10.1347	7.97709	7.8412e-06	-2.74213	-1.72516	0.501562	2.73521	turquoise	turquoise	purple
GEMIN5	-4.99996	12.5342	0.000271211	-1.07225	-0.423512	2.52401	3.27189	green	turquoise	magenta
NFE2L1	3.15573	13.1732	0.00747982	0.153324	0.816076	6.02868	5.54398	yellow	brown	darkseagreen4
GSK3B	-0.620517	11.8612	0.546655	-0.247853	0.138083	3.69884	3.75372	pink	turquoise	green
ITGB5	-2.61039	7.50039	0.0328607	-1.18417	-0.0664438	3.76377	4.38908	green	red	blue
ERC1	8.37292	13.8862	8.50542e-07	0.930864	1.57265	4.34142	3.08966	tan	blue	blue
XPO1	-2.23984	13.3752	0.0426743	-0.767758	-0.0149585	4.62302	5.01438	midnightblue	yellow	darkturquoise
RNF13	7.88703	10.3894	1.05945e-05	1.40377	2.50144	3.23088	1.27828	darkgreen	blue	black
PALB2	-4.06568	7.6538	0.00395627	-1.46943	-0.40045	0.753232	1.68817	cyan	yellow	yellow
DOPEY1	5.81444	13.7632	4.80436e-05	0.637265	1.38409	3.03146	2.02078	brown	blue	yellow
LYRM2	-1.47528	13.5514	0.16299	-0.586227	0.109298	1.65952	1.89799	cyan	yellow	darkolivegreen
BCKDHB	-0.34072	12.5585	0.738946	-0.343313	0.250064	0.585473	0.632098	black	green	lightcyan
KAT6A	14.2655	12.3467	4.86798e-09	0.902387	1.22654	4.93253	3.86807	brown	blue	darkorange
ZCCHC6	6.20281	11.8681	4.79516e-05	0.39761	0.829006	3.4945	2.88119	purple	brown	purple
ULK2	2.28759	13.8152	0.0384676	0.0160514	0.508088	2.36245	2.10038	lightgreen	brown	blue
TNPO1	-10.4063	12.143	2.09298e-07	-2.10465	-1.37669	4.4667	6.20737	blue	turquoise	royalblue
PLOD1	-9.08486	12.4259	7.66802e-07	-1.50496	-0.924509	4.63217	5.8469	turquoise	turquoise	salmon
ITGAE	-0.549724	13.6834	0.591369	-0.566073	0.335496	0.410393	0.525682	turquoise	turquoise	yellow4
DIS3	-2.11846	9.81288	0.0606958	-0.94702	0.0251205	3.12415	3.5851	cyan	yellow	royalblue
PIBF1	3.31532	10.5172	0.007304	0.203877	1.02289	2.23293	1.61954	greenyellow	magenta	darkgreen
TDRD3	5.963	7.86038	0.000360909	0.723382	1.64029	2.44634	1.2645	brown	magenta	pink
NUFIP1	-4.34654	13.6974	0.000704057	-1.02242	-0.34585	-0.32789	0.356246	turquoise	turquoise	turquoise
PDS5B	0.805913	11.0211	0.437337	-0.20326	0.438187	2.8941	2.77664	greenyellow	darkred	green
OXCT1	-7.03884	9.86601	3.80074e-05	-1.47645	-0.765467	2.06699	3.18795	blue	yellow	brown
RRAGB	6.65127	13.9987	1.09436e-05	0.810133	1.58128	1.5367	0.340997	yellow	grey60	tan
CYLD	7.24755	12.3578	8.63256e-06	0.684976	1.27116	3.29824	2.32017	yellow	blue	yellow
SLC27A5	-0.264217	12.2017	0.796023	-0.570143	0.446617	-0.352098	-0.290336	green	turquoise	turquoise
ZNF324	0.410341	9.31632	0.690832	-0.309014	0.446829	1.36518	1.29627	grey	grey	yellow
ZNF671	7.94251	12.7575	2.7336e-06	1.16862	2.0442	0.976491	-0.629922	purple	blue	blue
ZNF416	-4.86461	11.0004	0.000498924	-1.07123	-0.403839	-0.644686	0.0928478	turquoise	turquoise	blue
ZNF586	3.36086	13.7151	0.00478178	0.212847	0.967711	1.27172	0.681441	red	blue	brown
ZNF446	1.95097	10.1779	0.0791149	-0.0659789	1.0128	0.253126	-0.220283	magenta	purple	lightyellow
ZNF264	6.86708	9.08646	6.99873e-05	0.65567	1.29847	3.25536	2.27829	purple	blue	darkseagreen4
RPS5	-1.84438	7.9917	0.102394	-0.92599	0.103076	5.82414	6.2356	green	yellow	blue
FAT1	4.58338	13.9998	0.00042574	0.996678	2.74988	4.05486	2.18158	brown	brown	brown
YTHDC1	6.12456	12.5195	4.27935e-05	0.304812	0.639054	3.61703	3.1451	brown	blue	turquoise
CHMP2B	2.1306	11.6723	0.0551209	-0.013323	1.04518	2.20051	1.68458	greenyellow	magenta	lightyellow
SMAP2	2.36134	8.41118	0.0443803	0.0283546	1.76159	2.55952	1.66454	brown	lightgreen	bisque4
PPIE	-1.89654	10.4199	0.0859326	-0.467532	0.0363208	2.0417	2.25731	lightcyan	turquoise	turquoise
ZMPSTE24	0.503582	13.6043	0.622611	-0.42384	0.683013	3.00493	2.87534	pink	yellow	turquoise
STARD7	-7.88719	9.11152	2.30811e-05	-1.09367	-0.606844	4.26137	5.11163	blue	turquoise	green
NOA1	-2.79739	11.0817	0.017245	-0.695959	-0.0833506	2.00694	2.39659	black	green	black
REST	-0.555143	13.6326	0.587791	-0.328842	0.193885	3.83353	3.90101	green	yellow	yellow4
SSH1	7.87172	13.8174	1.79955e-06	1.08992	1.90769	5.08983	3.59102	yellow	blue	black
GSTP1	-9.88073	10.8549	9.27503e-07	-1.65455	-1.05091	4.834	6.18673	blue	turquoise	brown
APLP2	-9.66861	13.5667	1.85258e-07	-0.978034	-0.622026	6.6817	7.48173	turquoise	green	thistle1
FAM234B	4.77711	13.2616	0.000342134	0.426179	1.12731	2.01931	1.24256	yellow	blue	salmon4
WBP11	-2.72567	13.387	0.0169522	-0.69841	-0.0818151	3.19597	3.58609	blue	yellow	brown
EIF3I	-4.86007	10.9545	0.000508631	-0.924848	-0.348083	4.52907	5.16554	green	turquoise	pink
COL16A1	12.8723	13.8972	4.12539e-09	4.83213	6.76594	3.34195	-2.45709	brown	blue	black
TXLNA	-1.49561	8.11153	0.172608	-0.386189	0.0818837	4.71545	4.8676	green	turquoise	green
NCOA1	11.2399	9.62127	7.57112e-07	1.41505	2.11947	3.94905	2.18179	brown	blue	navajowhite2
AGBL5	-3.49306	11.2098	0.00489489	-0.713846	-0.162755	2.27164	2.70994	black	green	lightyellow
EFR3B	4.34974	12.412	0.000874897	0.702527	2.10236	0.171004	-1.23144	salmon	brown	greenyellow
KIF3C	-7.85841	12.3459	3.77305e-06	-1.30544	-0.740062	2.26534	3.28809	black	green	red
RAB10	-2.99655	11.2709	0.0118574	-0.647142	-0.0999811	3.818	4.19156	cyan	tan	brown
GCKR	-7.76186	10.5284	1.13068e-05	-5.83503	-3.24587	-5.1422	-0.601753	blue	turquoise	pink
HADHA	-2.92071	8.44949	0.0181765	-0.574039	-0.0701218	4.98143	5.30351	green	royalblue	blue
MAPRE3	3.63704	13.923	0.00271536	0.44094	1.71006	-0.182601	-1.2581	tan	blue	green
CAD	-3.97825	11.8323	0.00188185	-1.26336	-0.368315	3.66083	4.47667	green	turquoise	darkturquoise
CD59	1.06541	8.8154	0.315001	-0.260113	0.720459	7.58997	7.3598	red	blue	grey60
CD82	2.31268	13.7649	0.0367498	0.0501937	1.36159	1.72088	1.01499	salmon	cyan	cyan
BCORL1	1.09891	13.8614	0.290527	-0.387031	1.19879	1.33051	0.924635	tan	greenyellow	lightyellow
ATRX	2.83164	11.6827	0.0154831	0.104825	0.8138	4.59434	4.13502	greenyellow	brown	yellow
AK6	-2.37054	8.42223	0.0436966	-1.80305	-0.0327211	-0.488823	0.429061	cyan	yellow	turquoise
MYNN	0.916784	13.1344	0.375783	-0.305913	0.757774	1.28008	1.05415	greenyellow	pink	turquoise
MECOM	2.93628	13.9967	0.0108385	0.095375	0.612315	5.24743	4.89359	purple	brown	tan
SCAMP1	2.29067	10.2124	0.0444488	0.0171803	1.12682	3.15656	2.58456	greenyellow	pink	turquoise
PREP	0.93716	12.4247	0.366536	-0.17799	0.448466	2.39293	2.25769	pink	salmon	blue
HACE1	1.18046	9.67143	0.266035	-0.143756	0.464552	1.60973	1.44933	greenyellow	grey60	yellow
SEH1L	-0.484097	12.8651	0.636454	-0.436613	0.276899	2.01427	2.09412	midnightblue	yellow	turquoise
WDR47	-1.82378	11.7804	0.0936396	-0.621802	0.0557924	2.21804	2.50104	cyan	yellow	red
WDFY1	-7.62911	13.1229	3.5354e-06	-0.70141	-0.392061	3.89063	4.43736	blue	yellow	magenta
SLC25A24	-3.72219	10.9692	0.00338485	-1.24195	-0.318762	2.41386	3.19421	cyan	yellow	darkgrey
MAP3K4	3.02384	13.3672	0.00952009	0.0895838	0.533512	3.04082	2.72927	purple	brown	pink
ZNF213	-0.224985	12.4255	0.825649	-0.733616	0.595817	0.545765	0.614664	magenta	salmon	blue
AKR1B1	-12.7414	11.9018	2.70437e-08	-3.23903	-2.2923	0.953624	3.71929	turquoise	turquoise	green
CPNE3	1.09888	7.84271	0.304408	-0.222673	0.625386	3.7325	3.53114	darkgreen	pink	blue
RRN3	-0.353516	8.977	0.731862	-0.310159	0.226349	2.37106	2.41297	pink	turquoise	turquoise
CTTN	-4.47868	8.51305	0.0017637	-0.91818	-0.298329	5.17996	5.78822	green	red	steelblue
MTIF2	-3.97359	12.8175	0.00163174	-0.826585	-0.243795	1.76533	2.30052	green	yellow	brown
DDHD2	-1.58127	13.8014	0.136456	-0.446768	0.067863	3.28336	3.47281	green	yellow	blue
TTC39A	3.45988	13.4001	0.00405808	0.645143	2.77297	0.162288	-1.54677	yellow	brown	cyan
EPS15	9.80966	11.4549	6.45498e-07	0.604576	0.952179	4.30022	3.52184	purple	blue	cyan
ORC1	-10.2153	10.7135	7.44271e-07	-4.67644	-3.01404	-2.46698	1.37826	blue	turquoise	brown
MGST2	-1.35499	10.4367	0.204022	-0.869223	0.2095	2.42286	2.75272	grey	yellow	blue
CHERP	0.399289	12.2453	0.696557	-0.588067	0.852686	1.49829	1.36598	tan	salmon	royalblue
ATG16L1	0.294803	13.9833	0.772476	-0.164833	0.217359	2.78331	2.75704	green	red	turquoise
USP40	-1.1013	12.3307	0.291801	-0.427175	0.139761	2.54732	2.69103	green	red	cyan
POMGNT1	2.81143	13.9751	0.0138841	0.0701249	0.52167	3.92388	3.62798	red	brown	turquoise
RAD54L	-8.99584	9.3793	6.47626e-06	-4.05392	-2.43274	-2.83003	0.413296	blue	turquoise	brown
MAST2	-0.784579	10.6221	0.449844	-0.629731	0.299816	3.01966	3.18462	turquoise	red	turquoise
DNAJA1	-0.608755	9.81656	0.556511	-0.482492	0.275833	4.87713	4.98046	cyan	yellow	grey60
B4GALT1	7.93114	8.63922	3.00511e-05	1.29147	2.33142	5.37627	3.56483	yellow	blue	lightgreen
CHMP5	2.89485	9.95219	0.0160489	0.125275	0.964977	3.30644	2.76131	brown	blue	turquoise
NFX1	1.55898	9.31154	0.152304	-0.0932122	0.513389	2.83793	2.62784	skyblue	darkred	skyblue
DIMT1	-3.14261	12.0392	0.00845999	-1.05992	-0.192156	1.8093	2.43534	midnightblue	yellow	darkturquoise
IPO11	-5.30878	8.99531	0.000489007	-1.42983	-0.575332	2.29508	3.29766	pink	yellow	orangered4
EIF2AK1	-0.627034	7.1663	0.550084	-1.07733	0.624044	3.80382	4.03046	darkred	lightgreen	salmon
SEPHS1	-3.9143	12.4618	0.00191896	-0.687636	-0.197153	2.58958	3.03197	turquoise	turquoise	turquoise
MRPL28	-6.24329	8.08436	0.000236948	-1.63296	-0.753209	2.00277	3.19585	turquoise	turquoise	turquoise
ITPKC	4.91079	8.78716	0.000895702	0.525211	1.42854	3.28693	2.31006	yellow	brown	red
RBM22	4.29858	11.2686	0.00119195	0.17674	0.545446	3.39161	3.03051	brown	blue	pink
TMED2	-1.94113	10.3501	0.0799472	-0.93588	0.0622931	4.60836	5.04516	cyan	yellow	magenta
ERO1B	8.44237	12.4038	1.71568e-06	1.37848	2.33286	0.937638	-0.91803	greenyellow	blue	green
ZFAND6	0.620883	7.81457	0.55235	-0.384821	0.666796	2.7448	2.60381	grey60	magenta	lightcyan
TXLNG	-0.702247	9.6256	0.499154	-0.537013	0.280662	1.46121	1.58939	midnightblue	yellow	darkslateblue
LAT2	4.6718	8.50101	0.00135852	1.18795	3.45776	0.180934	-2.14192	brown	blue	green
HUWE1	-0.582843	13.9514	0.569301	-0.416049	0.238291	6.17192	6.2608	red	midnightblue	turquoise
ZW10	-5.90611	13.2626	4.7768e-05	-1.27546	-0.593278	1.80935	2.74372	blue	yellow	brown
ALG9	1.03322	11.9906	0.32189	-0.191598	0.537151	-0.235907	-0.408683	pink	tan	turquoise
NOX4	-7.1513	10.2724	2.6896e-05	-2.76428	-1.45453	0.977536	3.08694	turquoise	green	salmon
ACOX3	-0.56488	13.9784	0.581108	-0.451653	0.263364	2.11679	2.21094	green	black	midnightblue
MTMR2	-1.0159	8.89786	0.336505	-0.463796	0.176675	3.32664	3.47021	pink	tan	green
PPP1R15A	13.9926	9.03708	1.97549e-07	2.37095	3.28473	6.45444	3.6266	brown	blue	thistle2
HSD17B14	1.1703	13.2351	0.262523	-0.348009	1.17398	0.16003	-0.252954	salmon	cyan	yellow
TRIP6	-11.0513	13.2885	4.49425e-08	-1.61027	-1.08462	2.16332	3.51076	turquoise	turquoise	turquoise
FTL	-1.7009	10.3092	0.118882	-1.03913	0.137369	6.22502	6.67591	darkred	green	black
SRRT	-3.99927	8.413	0.00356911	-0.872872	-0.237853	3.59001	4.14537	lightcyan	turquoise	turquoise
BAX	-21.1455	8.90592	6.41043e-09	-2.87129	-2.31551	1.70556	4.29896	turquoise	turquoise	green
NLK	2.92875	10.9267	0.0138101	0.0850743	0.601355	3.11771	2.77449	greenyellow	blue	yellow
PIGS	-1.78646	13.5742	0.0963703	-0.360512	0.0333872	3.49755	3.66111	green	turquoise	mediumorchid
ATXN7L3	-4.53191	9.22023	0.00133744	-0.660396	-0.22169	3.65397	4.09501	turquoise	turquoise	red
PGS1	2.38144	8.10799	0.0440454	0.0121271	0.702954	3.14177	2.78423	orange	cyan	yellow
PSMC5	-2.16485	13.0015	0.0495896	-0.75796	-0.000789686	2.77014	3.14952	pink	turquoise	magenta
UIMC1	-1.54144	10.6561	0.152365	-0.629389	0.112123	2.83489	3.09352	lightcyan	turquoise	red
MMP2	9.32887	12.1446	6.87082e-07	1.36683	2.19841	8.20345	6.42083	yellow	brown	mediumpurple3
LPCAT2	4.22355	13.4356	0.000927715	0.631846	1.94619	4.52549	3.23647	greenyellow	blue	red
OGFOD1	-6.69799	13.9828	1.0202e-05	-0.998805	-0.514248	2.43641	3.19293	midnightblue	turquoise	royalblue
SH3BP2	4.95857	9.66088	0.000633194	0.418088	1.10639	4.94861	4.18637	brown	brown	pink
NOP14	-5.08975	12.9966	0.000207608	-1.00529	-0.406173	2.49146	3.19719	turquoise	turquoise	magenta
ADD1	6.59202	10.6111	4.63766e-05	0.448907	0.901972	6.18561	5.51017	brown	blue	black
L2HGDH	-2.80176	11.6045	0.0164485	-1.46626	-0.180662	-1.60241	-0.778949	pink	turquoise	brown
TXNDC16	4.37749	9.32781	0.00163202	0.769258	2.39651	1.08255	-0.500336	greenyellow	magenta	tan
NID2	-4.64742	13.5345	0.000411309	-3.07573	-1.12898	0.713073	2.81543	black	green	blue
GMCL1	2.25166	13.1654	0.0420389	0.0162112	0.760013	1.33898	0.950866	greenyellow	pink	yellow
SF3B2	-2.47704	11.6307	0.0296786	-0.61883	-0.0385514	4.70049	5.02918	green	red	purple
KLHL42	-0.946145	13.1836	0.361094	-0.468975	0.183024	2.33364	2.47662	pink	yellow	turquoise
GNAS	0.00235173	12.2878	0.998161	-0.287464	0.288087	6.44752	6.44721	tan	greenyellow	paleturquoise
DNM1L	-6.17108	12.8604	3.53585e-05	-1.31195	-0.631007	3.14208	4.11356	midnightblue	yellow	magenta
PTHLH	4.0488	10.2829	0.00219956	1.23224	4.22348	1.0507	-1.67716	yellow	blue	greenyellow
ERGIC2	0.225082	9.82338	0.826528	-0.502793	0.615484	2.47627	2.41992	darkgrey	pink	darkolivegreen
AURKA	-9.50523	8.80733	6.35638e-06	-5.67731	-3.48861	-1.73111	2.85185	blue	turquoise	brown
PIR	-1.90047	9.80195	0.0871487	-1.56921	0.126677	2.96493	3.68619	blue	yellow	black
AAMDC	3.02902	9.90169	0.0128357	0.145086	0.956503	0.979422	0.428628	magenta	grey	brown
RFX2	7.3856	13.0286	5.23566e-06	1.34992	2.46581	2.76623	0.858368	brown	brown	darkgrey
METTL2A	-2.07126	10.8959	0.0628758	-0.542804	0.0167981	0.778376	1.04138	midnightblue	yellow	turquoise
ALG6	-0.498701	12.6717	0.626534	-0.585908	0.366608	0.685883	0.795533	grey60	yellow	brown
CNOT3	-1.82549	8.80974	0.101935	-1.2109	0.131328	1.77074	2.31053	pink	salmon	saddlebrown
PTPN4	-0.454873	10.3247	0.658615	-0.488514	0.322284	2.02859	2.11171	salmon	black	salmon4
DDX18	-0.771256	11.5965	0.455983	-0.509596	0.243902	3.4398	3.57265	midnightblue	yellow	saddlebrown
KHSRP	-5.95839	13.2058	4.45798e-05	-1.06334	-0.498096	3.79034	4.57105	pink	turquoise	brown
GNA11	-2.58865	11.6472	0.0242075	-0.596416	-0.0502755	3.96565	4.28899	pink	turquoise	steelblue
ASAP3	9.46355	10.6593	1.62713e-06	1.92757	3.10187	4.50686	1.99214	brown	brown	black
EDEM2	-0.46518	10.9927	0.650882	-0.407001	0.264987	3.2007	3.27171	grey	green	black
DNMT3B	-8.3162	8.81931	1.83689e-05	-2.49543	-1.42552	-1.00609	0.954384	turquoise	turquoise	blue
FER1L4	1.07173	13.8804	0.302123	-0.507445	1.51944	-0.106222	-0.612222	darkorange	purple	mediumpurple3
PDRG1	-6.06441	13.7104	3.1881e-05	-1.70868	-0.814528	-0.312683	0.948919	turquoise	turquoise	turquoise
EPB41L1	10.7918	9.05014	1.80754e-06	2.52407	3.86147	3.69922	0.506454	yellow	blue	lightgreen
DOCK9	5.3388	10.4924	0.000279315	0.474904	1.14789	6.37388	5.56248	brown	brown	darkgreen
ANKRD10	4.82755	13.7803	0.000280422	0.334133	0.869833	3.52285	2.92086	purple	brown	midnightblue
TGDS	-0.149037	12.6524	0.883873	-0.505179	0.440146	0.218291	0.250807	midnightblue	tan	steelblue
C3orf18	1.26462	11.0326	0.23207	-0.2995	1.10917	0.0232907	-0.381544	grey	brown	darkgreen
COQ9	-4.5036	9.01642	0.00147449	-0.988181	-0.327499	1.95723	2.61507	blue	turquoise	blue
KIF9	3.46463	10.7173	0.00549171	0.191918	0.866422	1.1118	0.582626	brown	brown	brown
ARHGAP28	2.96365	12.8251	0.011119	0.235287	1.50738	3.46727	2.59594	yellow	brown	thistle1
CRLS1	-3.07579	11.2924	0.010255	-0.809007	-0.135361	1.97029	2.44247	cyan	yellow	darkgrey
PPP1R13B	3.6762	13.9999	0.00249209	0.31706	1.20516	3.02642	2.26531	yellow	brown	honeydew1
ATRN	10.9673	13.3611	4.67134e-08	0.510164	0.759601	4.4351	3.80022	yellow	brown	mediumpurple3
SMOX	-3.17006	7.51149	0.0143157	-2.87915	-0.438319	0.30915	1.96788	turquoise	green	brown
FKBP1A	3.30266	13.9899	0.00523899	0.273882	1.28873	5.49037	4.70906	tan	greenyellow	blue
NSFL1C	-0.223324	12.6792	0.826841	-0.298274	0.242515	3.19443	3.22231	lightcyan	turquoise	magenta
SLC4A11	-10.3002	8.00102	6.79704e-06	-6.46674	-4.10091	-3.72333	1.56049	turquoise	green	green
C20orf194	0.556063	12.0753	0.588323	-0.193412	0.326087	2.92649	2.86016	royalblue	cyan	lightcyan
ZNF343	0.284491	9.86514	0.781916	-0.277163	0.358127	1.25127	1.21079	lightcyan	red	turquoise
EBF4	7.44302	9.90626	2.32084e-05	2.23174	4.14233	1.65584	-1.5312	yellow	brown	yellow
CPXM1	3.04472	13.4733	0.00907068	0.374232	2.18043	0.644383	-0.63295	salmon	brown	mediumpurple3
MAVS	-5.43568	10.9219	0.000210437	-1.18242	-0.500419	4.28215	5.12357	turquoise	green	tan
LZTS3	-1.70996	8.19293	0.124754	-2.16311	0.316714	-1.04933	-0.126129	black	green	yellow
XRN2	-3.22307	8.92315	0.0105544	-0.655004	-0.114328	4.18961	4.57428	green	yellow	brown4
KIZ	6.11916	11.6566	5.87335e-05	0.767936	1.62153	1.17737	-0.0173635	brown	brown	blue
DYNLL1	-0.560848	13.9998	0.583767	-0.533695	0.312437	3.76791	3.87854	cyan	salmon	brown
SNX5	-6.03859	13.1421	3.98715e-05	-1.23933	-0.586747	2.96298	3.87602	midnightblue	yellow	grey60
RPL6	-3.03777	8.28787	0.0154655	-0.627012	-0.087717	5.3982	5.75556	red	royalblue	blue
MAPKAPK5	-0.754751	11.7093	0.465308	-0.405698	0.197368	2.48077	2.58493	green	red	turquoise
P2RX7	6.26678	8.99855	0.00014677	1.3907	2.96193	0.635816	-1.5405	brown	blue	cyan
ESF1	0.0937959	13.9556	0.926605	-0.321818	0.351244	1.69455	1.67983	midnightblue	tan	turquoise
RBBP9	0.791184	9.34973	0.448441	-0.254405	0.530485	2.28999	2.15195	darkgrey	pink	yellow
ANAPC5	-3.06448	13.7266	0.00856833	-0.306876	-0.0539008	4.69967	4.88006	red	turquoise	darkgrey
SLC23A2	2.37603	10.2122	0.0383889	0.0210899	0.629059	3.82522	3.50015	yellow	brown	salmon4
SLC8B1	5.57379	10.2618	0.000214926	0.57238	1.3304	3.40953	2.45814	brown	blue	white
TMEM230	-0.801551	7.18669	0.4485	-1.03812	0.510433	2.81416	3.07801	grey60	lightcyan	red
DZANK1	0.0451758	10.9247	0.964782	-0.459144	0.478371	-1.26313	-1.27275	black	black	magenta
KDM2B	-5.82334	9.17321	0.000234174	-1.08501	-0.479138	1.80884	2.59092	turquoise	turquoise	bisque4
TASP1	5.3677	12.3478	0.000152874	0.681178	1.60714	1.27634	0.132186	purple	blue	turquoise
OAS1	9.73144	9.95789	2.1057e-06	3.09736	4.93828	1.95989	-2.05793	yellow	blue	greenyellow
GCN1	-4.03991	12.1731	0.00159428	-1.03338	-0.310004	4.78441	5.4561	green	red	darkgrey
RPLP0	-2.44118	7.29575	0.0433133	-1.1246	-0.0225189	6.58983	7.16339	green	darkturquoise	blue
PXN	0.457708	8.99166	0.658022	-0.397142	0.59858	5.51812	5.4174	tan	midnightblue	brown
KIF16B	8.12688	13.3317	1.58831e-06	0.961956	1.65618	2.04181	0.732742	yellow	blue	skyblue3
TRMT6	-1.34634	13.9329	0.199688	-0.879239	0.201276	0.607384	0.946366	midnightblue	yellow	turquoise
PEBP1	-4.45712	10.2929	0.00113797	-0.920539	-0.308498	3.99014	4.60466	green	turquoise	cyan
BRAP	2.6598	13.6879	0.0189553	0.0204828	0.192991	2.42406	2.31732	black	green	turquoise
ERP29	0.512108	8.30125	0.621919	-0.317095	0.499612	3.7119	3.62064	grey	grey	green
FUS	0.129005	13.9752	0.899192	-0.925172	1.04357	3.66387	3.60467	pink	salmon	magenta
IGBP1	2.67062	9.791	0.0238719	0.0754786	0.849133	3.04812	2.58582	salmon	lightyellow	tan
FXYD5	1.93965	10.7083	0.0792069	-0.0736723	1.13742	4.76323	4.23135	brown	greenyellow	pink
ZNF302	0.0539154	13.8743	0.957771	-0.340731	0.358288	1.34095	1.33218	magenta	grey60	greenyellow
GRAMD1A	3.75493	13.9936	0.00213406	0.296084	1.08496	4.64681	3.95629	salmon	brown	paleturquoise
HEPH	13.5773	7.83035	1.01544e-06	4.88948	6.8993	3.53758	-2.35681	white	blue	skyblue3
CDIP1	5.91926	10.705	0.000111929	0.640961	1.40386	3.83721	2.8148	yellow	blue	yellow
CMTM1	-2.55013	13.3861	0.0237506	-1.23897	-0.104319	-1.65275	-0.98111	black	turquoise	turquoise
GANAB	-1.05315	11.7208	0.3135	-0.206684	0.0722263	6.12961	6.19684	red	purple	lightcyan
GMIP	-0.5945	9.33787	0.566302	-0.962027	0.559863	1.88792	2.089	black	green	bisque4
RBM41	1.23152	10.6108	0.244725	-0.156013	0.548379	0.911176	0.714993	magenta	tan	green
BIRC5	-14.8361	9.83363	4.6964e-08	-6.06803	-4.48022	-1.75272	3.5214	blue	turquoise	brown
MLF2	-6.6938	8.873	9.53005e-05	-0.756181	-0.373555	3.54145	4.10631	turquoise	turquoise	turquoise
OTUB2	-1.57968	13.6062	0.13714	-1.35418	0.207266	-1.50846	-0.935002	black	green	turquoise
DDX24	5.38962	10.1493	0.000290669	0.411293	0.989069	5.41675	4.71657	purple	blue	grey60
ZBTB25	4.53477	11.4389	0.000771283	0.21105	0.60554	1.35845	0.950154	brown	brown	yellow
NECAP1	1.97364	13.375	0.0694482	-0.0230765	0.527485	2.23084	1.97863	green	yellow	turquoise
ARHGAP4	4.94666	13.9129	0.000218736	0.696469	1.76384	3.64597	2.41582	brown	brown	lightgreen
DHX32	-6.60142	8.58693	0.000122895	-1.13953	-0.554679	1.83503	2.68213	turquoise	turquoise	yellow
RCOR1	-4.94806	11.8539	0.000349959	-0.765836	-0.297132	2.28314	2.81463	pink	turquoise	royalblue
GPATCH2L	6.69463	13.4843	1.23293e-05	0.221338	0.431122	3.83353	3.5073	purple	brown	midnightblue
LTBP4	10.3911	13.0377	1.12075e-07	3.20443	4.88597	7.06171	3.01651	yellow	brown	sienna3
BLVRB	0.187287	7.2547	0.856566	-1.20074	1.40891	1.97326	1.86917	darkred	lightgreen	blue
SLC9A1	-4.80161	13.6481	0.000302215	-1.18919	-0.453606	2.85254	3.67394	pink	turquoise	lightcyan1
SPTLC1	0.803199	9.2086	0.442097	-0.324776	0.684291	3.433	3.25324	darkgrey	pink	turquoise
PAPOLA	-0.453374	8.82362	0.661223	-0.49765	0.3319	4.41174	4.49462	grey60	tan	darkturquoise
CCNK	6.52676	12.307	2.50185e-05	0.528395	1.05578	0.409299	-0.382787	magenta	blue	brown
PCBP4	-3.34567	8.97982	0.0086095	-1.00057	-0.193159	2.11901	2.71587	green	red	plum2
YPEL3	4.40833	12.4874	0.000776508	0.835214	2.45379	3.02182	1.37732	yellow	brown	darkred
MRPS33	-0.557079	7.46406	0.593778	-0.933173	0.573691	0.750621	0.930362	darkgrey	yellow	brown
NDUFB2	-4.76214	9.93347	0.000780406	-1.25993	-0.456231	2.30489	3.16297	blue	turquoise	ivory
NUDC	-6.02796	12.3506	5.27558e-05	-1.27844	-0.601182	2.72626	3.66607	turquoise	turquoise	magenta
MAEA	-2.1718	8.16948	0.0609525	-0.562596	0.0158485	3.10408	3.37746	turquoise	red	turquoise
ICAM1	16.4746	13.8964	1.6339e-10	5.40917	7.02968	5.90641	-0.313011	yellow	blue	yellow
STRN4	-5.43949	10.2733	0.000259387	-0.848703	-0.356712	3.96786	4.57056	turquoise	red	green
IRAK3	14.9077	7.53613	7.28325e-07	2.38988	3.27575	4.6731	1.84029	brown	blue	black
MUL1	0.599987	13.0793	0.558767	-0.197216	0.34901	2.39104	2.31515	black	red	floralwhite
TFAP4	-3.0186	13.7866	0.00933949	-0.990077	-0.166855	0.0376484	0.616114	turquoise	turquoise	pink
PDCD7	1.21585	13.4477	0.244953	-0.097194	0.349372	1.97853	1.85244	black	turquoise	black
SPG21	-2.6513	10.8479	0.0227733	-0.3842	-0.0353296	2.89465	3.10441	black	turquoise	black
DNAJB11	-1.77043	13.0415	0.100013	-0.730256	0.072326	2.32988	2.65884	pink	yellow	lightsteelblue1
RAB11FIP3	0.692422	8.56819	0.507002	-0.245366	0.459446	3.45245	3.34541	magenta	black	midnightblue
GNPTG	5.02027	13.7085	0.000199626	0.446543	1.11501	3.12158	2.3408	yellow	brown	yellow
ZNF268	2.46856	13.6045	0.0274931	0.0583822	0.848295	2.21259	1.75925	brown	blue	blue
GOLGA3	1.73523	8.9834	0.116785	-0.0756244	0.573099	5.3556	5.10687	red	black	red
PABPC4	-3.23289	13.6211	0.00620174	-0.335295	-0.0674226	4.53819	4.73955	blue	turquoise	brown
CERS4	5.48261	9.66237	0.000302896	1.93351	4.6023	0.506974	-2.76093	yellow	blue	blue
MCOLN1	1.74627	11.3068	0.107841	-0.162815	1.43367	0.73696	0.101535	tan	salmon	turquoise
USP48	-1.84444	10.27	0.0941214	-0.509923	0.0471424	3.75211	3.9835	turquoise	turquoise	darkgrey
EFNB1	-15.5124	13.9337	3.48697e-10	-4.12786	-3.12466	-0.07068	3.55558	turquoise	turquoise	cyan
PDPR	3.8938	13.9907	0.00162331	0.24069	0.831081	3.37062	2.83473	greenyellow	blue	sienna3
AARS	-2.08467	11.4128	0.0603023	-0.777766	0.0193969	4.15177	4.53095	green	turquoise	green
GLG1	4.06472	11.7711	0.00162989	0.160228	0.532184	6.04228	5.69607	lightgreen	brown	black
KIF4A	-9.07386	8.25527	1.42185e-05	-5.4215	-3.23368	-1.72829	2.5993	blue	turquoise	brown
TNRC6A	-0.139802	7.64663	0.892429	-0.342102	0.30329	3.90479	3.92419	green	salmon	salmon
PLEKHG2	1.89238	9.94161	0.08789	-0.113722	1.38889	4.38913	3.75155	darkorange	purple	lightpink4
NAT14	-3.5308	8.68536	0.0067753	-1.8207	-0.393929	0.428315	1.53563	black	green	red
PITPNM2	-3.41871	10.1256	0.00644577	-1.32959	-0.281395	1.21267	2.01816	turquoise	turquoise	cyan
EXOC1	0.422378	13.6738	0.679315	-0.239045	0.355959	3.06944	3.01099	red	magenta	blue
RBM27	0.123955	10.7438	0.903639	-0.599237	0.670541	1.41147	1.37582	grey60	pink	turquoise
OSBPL8	1.96086	12.9052	0.0718414	-0.0442507	0.907089	3.42172	2.9903	greenyellow	pink	pink
DTX2	2.05737	9.89545	0.0669742	-0.0307835	0.758901	-0.0444427	-0.408501	magenta	purple	turquoise
PUS7	-12.4075	13.9801	6.18496e-09	-1.42542	-1.0052	2.07119	3.2865	blue	turquoise	darkorange2
NRCAM	-14.6875	8.74975	1.82235e-07	-7.24634	-5.30477	-1.94164	4.33391	turquoise	turquoise	brown
LAMB1	1.54615	13.8218	0.144653	-0.0899973	0.552874	7.68334	7.4519	lightgreen	brown	blue
DLD	-4.60946	13.8707	0.000414742	-0.734292	-0.26767	2.72205	3.22303	pink	yellow	darkorange2
WDR7	7.37254	12.5356	6.67674e-06	0.523166	0.959178	2.59085	1.84968	yellow	blue	green
TXNL1	-1.30731	9.96953	0.220454	-0.855929	0.223098	2.51312	2.82953	grey60	yellow	cyan
CMTM6	-4.48213	9.13658	0.0014714	-1.43981	-0.475394	3.23585	4.19345	cyan	yellow	steelblue
ITGA6	-19.2859	13.2232	4.55176e-11	-4.75543	-3.79883	1.65473	5.93186	turquoise	turquoise	cyan
RAPGEF4	17.5347	13.7839	8.09362e-11	3.1261	3.99889	3.85021	0.287721	yellow	blue	lightgreen
MAP3K20	-0.000687026	12.7814	0.999462	-0.291316	0.291131	3.23988	3.23997	green	yellow	brown
FH	-7.85517	13.535	2.10684e-06	-2.26604	-1.29154	1.99774	3.77653	blue	turquoise	magenta
SEL1L3	-2.47291	13.8124	0.0270351	-1.03518	-0.0729011	3.74424	4.29828	black	turquoise	salmon4
CDV3	-0.317964	10.3302	0.756847	-0.41164	0.308437	5.39812	5.44972	midnightblue	yellow	darkmagenta
ALKBH5	-1.60315	12.0541	0.134767	-0.35573	0.0540605	3.76637	3.9172	turquoise	turquoise	darkgrey
NLRP1	3.07289	13.5785	0.00851879	0.217716	1.23377	5.09633	4.37059	purple	brown	black
PITPNM3	5.28407	13.7246	0.000123373	1.34905	3.19828	1.5657	-0.707966	purple	blue	skyblue
SPAG7	-0.982732	11.4649	0.346024	-0.292439	0.111285	2.65675	2.74733	black	black	turquoise
ORC6	-9.77011	9.38238	3.18848e-06	-6.97791	-4.36729	-4.33305	1.33956	turquoise	turquoise	purple
ZC3HC1	-7.0276	12.4185	1.14809e-05	-1.13538	-0.599504	1.28812	2.15556	lightcyan	turquoise	magenta
RGS17	-4.71083	8.89454	0.00113924	-4.93909	-1.73052	-4.53591	-1.20111	black	green	darkorange2
ANGPT2	-8.535	11.2967	2.9274e-06	-3.91963	-2.31659	1.26992	4.38803	turquoise	turquoise	red
TMEM101	0.518901	10.2261	0.614873	-0.370389	0.596158	2.52395	2.41107	red	red	lightcyan
CD200	7.83661	11.6964	5.44444e-06	1.72065	3.0512	2.49634	0.110414	yellow	blue	mediumpurple3
CCDC80	18.7331	10.1277	3.42145e-09	2.78479	3.53522	5.40793	2.24793	brown	blue	mediumorchid
PSME1	2.26128	12.4821	0.0423175	0.0185653	0.896444	3.52233	3.06483	brown	blue	black
PPP2R3C	-0.493004	10.6789	0.63199	-0.821246	0.521568	1.43993	1.58976	grey60	lightcyan	lightyellow
HAUS4	0.987404	9.75845	0.347294	-0.218448	0.564052	1.26332	1.09052	green	darkturquoise	lavenderblush3
JPH4	14.7975	9.21468	9.85326e-08	5.71245	7.7656	1.39691	-5.34212	yellow	blue	greenyellow
SLC7A8	10.0039	8.51874	5.36821e-06	2.13256	3.39285	1.41107	-1.35164	brown	blue	lightgreen
OSGEP	-0.929872	13.9927	0.368202	-0.370715	0.146491	2.22503	2.33714	red	turquoise	brown
SLC22A17	22.5985	11.5016	6.86692e-11	4.28671	5.2064	3.49564	-1.25091	yellow	blue	saddlebrown
RNF31	-2.12273	10.0157	0.0597062	-0.635265	0.0153234	1.85696	2.16693	green	turquoise	tan
SCFD1	-0.253753	9.11777	0.805316	-0.511851	0.408418	2.23173	2.28345	cyan	yellow	magenta
G2E3	-3.62434	12.852	0.00313881	-1.38799	-0.350508	0.953528	1.82278	cyan	yellow	brown
HECTD1	0.738263	12.0736	0.474461	-0.111362	0.225622	5.55343	5.4963	red	lightyellow	green
HNRNPC	-4.37454	10.9632	0.00111791	-1.01473	-0.335237	5.1924	5.86738	green	yellow	darkturquoise
SUPT16H	-8.27577	10.9309	4.92487e-06	-0.981219	-0.568693	4.04413	4.81909	green	turquoise	purple
TOX4	1.80919	12.3456	0.0948219	-0.0321436	0.352663	3.57315	3.41289	red	darkgrey	salmon
GEMIN2	-4.47845	11.5921	0.000820981	-1.25834	-0.432504	-0.234586	0.610833	midnightblue	yellow	magenta
TINF2	1.63773	10.9877	0.12977	-0.0687751	0.468504	3.40117	3.20131	red	darkturquoise	darkgreen
SEMA6A	9.81379	13.9998	1.17858e-07	2.27997	3.55526	2.16903	-0.748581	yellow	blue	pink
TRPM7	1.71781	11.7933	0.111949	-0.0947118	0.794105	3.45048	3.10078	red	pink	green
TYRO3	-7.49169	8.3989	5.40157e-05	-2.16336	-1.15142	0.331185	1.98857	turquoise	turquoise	black
WDR76	-7.87708	12.3634	3.64792e-06	-2.26108	-1.28376	0.207458	1.97988	blue	turquoise	brown
SNAP23	-4.22736	9.98741	0.001756	-1.22895	-0.380502	3.08241	3.88714	cyan	turquoise	palevioletred3
PHGDH	-7.53828	12.028	6.77893e-06	-2.79657	-1.5427	0.266996	2.43663	blue	green	royalblue
COL9A3	12.2571	11.2981	7.1291e-08	5.13341	7.37173	2.8856	-3.36697	yellow	blue	pink
EZR	-0.574403	13.6962	0.575009	-0.471831	0.272819	3.9857	4.08521	blue	turquoise	darkmagenta
MYL6	-2.32429	12.7233	0.0373469	-0.757416	-0.0268479	6.77262	7.16475	green	turquoise	brown
AGO1	-1.66659	9.6389	0.127704	-0.465121	0.0682197	3.90992	4.10837	green	green	black
CLSPN	-12.5728	13.5085	7.7308e-09	-4.42742	-3.13324	-1.71207	2.06825	blue	turquoise	brown
RFFL	4.73845	11.0461	0.000603993	0.438068	1.1973	1.97194	1.15426	brown	brown	navajowhite2
UNC13D	3.12906	13.0944	0.00792629	0.406938	2.21775	1.64183	0.329482	red	blue	pink
MFSD11	3.59623	11.7018	0.003815	0.240739	0.986199	2.03057	1.4171	greenyellow	magenta	saddlebrown
DPYSL2	-3.59711	13.7845	0.00298154	-0.567704	-0.143202	5.67108	6.02654	red	green	lightcyan
TGFB2	11.4261	9.09107	1.07088e-06	4.35883	6.50674	4.41853	-1.01426	brown	blue	turquoise
GPATCH2	2.32414	11.1652	0.0399612	0.0152394	0.542006	1.73678	1.45816	grey	brown	red
NUP50	-9.46633	13.9261	1.91762e-07	-1.1667	-0.735501	2.63078	3.58188	blue	turquoise	purple
CDC45	-11.1502	12.4502	7.65709e-08	-2.89474	-1.95154	0.142461	2.5656	blue	turquoise	brown
COMT	-0.77478	8.55222	0.459353	-0.37274	0.183686	3.89605	3.99058	turquoise	red	red
ADA2	5.29431	8.52694	0.000594815	2.04643	5.14565	2.07429	-1.52175	brown	brown	plum
ECHDC1	-1.54215	12.7372	0.147508	-0.823243	0.138298	1.66727	2.00974	pink	yellow	pink
LRRFIP2	-5.39486	9.52725	0.000358691	-0.570589	-0.235438	3.19289	3.5959	green	turquoise	orangered4
SEC22C	-1.65989	10.6027	0.126186	-0.51954	0.0739781	3.31039	3.53318	green	yellow	violet
XYLB	-1.33972	10.6786	0.20815	-0.809082	0.198206	-0.391169	-0.0857309	blue	turquoise	brown
HDAC6	6.44456	13.9663	1.55421e-05	0.481046	0.961113	3.62789	2.90681	purple	brown	black
CDC6	-12.8234	12.8207	1.09973e-08	-5.45245	-3.87826	-1.92049	2.74486	blue	turquoise	brown
UPRT	1.59557	11.144	0.138531	-0.0816505	0.51451	0.800414	0.583985	magenta	yellow	darkred
CDC23	-4.17722	10.8321	0.00159555	-0.843757	-0.260709	2.42507	2.97731	blue	yellow	brown
AAAS	-9.21539	12.5377	6.11862e-07	-1.45378	-0.899925	2.34831	3.52516	green	turquoise	brown
CBX5	-3.24899	8.20787	0.0113199	-0.805348	-0.138432	4.66003	5.13192	green	turquoise	brown
SUCO	3.51576	10.0228	0.00555851	0.247229	1.10214	3.19396	2.51927	greenyellow	magenta	turquoise
MSH2	-1.51731	13.984	0.151467	-0.792851	0.135892	2.37509	2.70356	midnightblue	yellow	brown
MAP3K1	12.2512	12.0371	3.71552e-08	1.56013	2.23481	4.05348	2.15601	yellow	blue	green
DHPS	-1.8446	11.3105	0.0914251	-0.548209	0.0473826	2.25383	2.50424	lightcyan	red	green
HOOK2	0.74937	8.62424	0.473577	-0.426708	0.845271	1.03799	0.828711	lightyellow	black	yellow
ARCN1	-3.04748	8.19249	0.0154427	-0.698023	-0.0980766	4.96278	5.36083	midnightblue	yellow	steelblue
TMEM38B	-1.11063	13.9089	0.28556	-0.550354	0.174985	-0.154533	0.0331513	turquoise	turquoise	grey60
PSMD5	-1.82037	13.9414	0.0902333	-0.436671	0.0358128	2.9152	3.11563	midnightblue	tan	brown4
PTGS1	15.234	12.3046	2.35538e-09	4.04553	5.39156	7.23982	2.52127	brown	blue	white
NUP188	-4.52485	12.959	0.000575214	-0.897987	-0.317481	3.62325	4.23099	green	turquoise	brown
CRAT	-1.02456	13.3732	0.323746	-0.412034	0.146429	2.88866	3.02147	lightyellow	black	blue
SH2D3C	-7.61341	11.4373	8.28427e-06	-1.5049	-0.832356	3.08035	4.24898	black	green	cyan
NANS	-3.56274	12.0526	0.0038788	-1.26742	-0.305785	1.71885	2.50546	turquoise	turquoise	grey
TBC1D2	4.84383	14	0.000260252	0.751074	1.94475	1.77724	0.429325	yellow	blue	greenyellow
CWF19L1	-2.26795	9.80552	0.0472304	-0.65982	-0.00495401	1.95526	2.28765	green	turquoise	brown
SEMA4G	-7.16513	9.09648	4.99729e-05	-3.07466	-1.60089	-2.08757	0.250197	black	green	mediumpurple3
BTAF1	1.10571	11.0058	0.292438	-0.158517	0.478611	3.73679	3.57674	red	magenta	turquoise
IKZF5	1.6625	9.34312	0.129534	-0.17625	1.17451	0.842993	0.343864	tan	darkred	turquoise
CRTAC1	13.6763	13.2577	3.37748e-09	6.23186	8.56456	7.43955	0.0413411	brown	blue	green
BAMBI	7.95792	9.2754	1.93374e-05	2.06887	3.70191	2.18115	-0.704248	brown	blue	turquoise
WAC	1.1835	7.29196	0.273753	-0.211081	0.641033	4.6506	4.43563	grey60	magenta	yellow
CREM	2.14856	8.67123	0.0613094	-0.0265548	0.926917	1.71057	1.26039	greenyellow	magenta	turquoise
NUBP2	-4.23408	7.79474	0.00303349	-1.39968	-0.409701	2.34222	3.24691	lightcyan	turquoise	red
HIVEP1	4.34192	12.187	0.000925069	0.323994	0.974464	3.6192	2.96997	purple	blue	red
FKBP5	1.09824	10.6998	0.296198	-0.334021	0.994807	3.27608	2.94569	grey	grey	lightgreen
SRPK1	-3.82193	10.0275	0.00334624	-0.985196	-0.259704	3.50245	4.1249	midnightblue	yellow	grey60
BRPF3	5.88619	12.6846	5.91816e-05	0.439405	0.951013	3.49466	2.79945	tan	greenyellow	green
MRPS18A	-3.05295	9.29059	0.0132385	-0.818797	-0.123727	0.474317	0.945579	black	turquoise	pink
TMEM14A	-1.51491	10.6542	0.158886	-0.862968	0.160985	0.137835	0.488826	black	green	lightgreen
EFHC1	2.45611	12.7764	0.0291663	0.0443152	0.701455	1.89136	1.51847	purple	brown	black
HSP90AB1	-4.70149	9.69114	0.000914317	-0.98944	-0.351285	7.41406	8.08442	green	turquoise	brown
CDC5L	-1.75275	8.38918	0.115992	-0.601195	0.0795732	3.34778	3.60859	green	yellow	darkturquoise
ITPR3	-3.74959	9.85519	0.00388396	-1.53983	-0.390484	4.15129	5.11645	turquoise	turquoise	pink
ZNF184	-3.915	12.4453	0.00192111	-0.822462	-0.235824	0.600471	1.12961	turquoise	turquoise	mediumorchid
DSP	12.8969	11.0034	5.50834e-08	6.869	9.69585	3.34542	-4.93701	white	blue	lightsteelblue1
SIRT1	3.76723	11.7151	0.00279687	0.348086	1.30916	1.9904	1.16178	greenyellow	blue	green
HNRNPH3	1.06852	10.6502	0.308908	-0.346287	0.994683	2.6705	2.34631	tan	darkred	magenta
IFT74	3.45504	12.9764	0.00427716	0.249423	1.08224	0.941626	0.275794	greenyellow	blue	cyan
JAK2	4.79994	13.7601	0.000296382	0.473815	1.24156	2.15974	1.30205	darkgreen	blue	grey60
ABL1	-2.20767	11.1269	0.0491533	-0.517159	-0.00114339	4.54491	4.80406	turquoise	red	bisque4
ACOT7	-5.52201	11.7875	0.000140325	-1.49508	-0.647853	1.09616	2.16763	turquoise	turquoise	brown4
SH3GLB1	1.77768	7.77827	0.11442	-0.0951703	0.721984	5.10746	4.79405	darkgreen	pink	plum2
CDC7	-4.08676	10.7973	0.00186939	-2.61961	-0.782923	-0.560528	1.14074	midnightblue	yellow	purple
SYDE2	10.0924	12.3069	2.60937e-07	1.60007	2.47805	1.10889	-0.93017	brown	blue	red
PCSK5	3.09595	13.0434	0.00848371	0.193791	1.08777	2.06912	1.42835	yellow	brown	violet
SCD	-5.08961	12.8996	0.000212561	-2.33283	-0.941773	3.53991	5.17721	blue	turquoise	grey60
TMED1	-1.44428	9.66815	0.180273	-0.829516	0.178899	-0.365168	-0.039859	black	green	red
ABLIM1	9.44952	10.3928	1.9985e-06	2.02233	3.26199	7.27872	4.63656	yellow	blue	blue
ERMP1	4.88661	10.4576	0.000558083	0.384858	1.02302	2.8175	2.11356	magenta	brown	green
RAB18	-0.358013	11.1018	0.727048	-0.631178	0.4544	3.05166	3.14005	grey60	pink	saddlebrown
NRP1	-15.6972	10.349	1.49645e-08	-3.67884	-2.76792	3.12461	6.34799	turquoise	turquoise	lightcyan
PRTFDC1	-4.32647	13.7111	0.000729898	-1.18411	-0.398166	-0.484177	0.306961	turquoise	turquoise	brown
PALMD	7.75035	12.6382	3.76807e-06	1.20174	2.13439	5.79934	4.13128	brown	blue	mediumorchid
TSPAN15	-9.88644	12.0446	3.92729e-07	-3.78927	-2.42116	0.0159059	3.12112	black	green	lightcyan
WASHC2A	-0.789151	8.78798	0.450788	-0.446523	0.216187	1.53307	1.64824	black	red	green
MAST3	2.28132	8.2369	0.051053	-0.0054811	1.90096	0.708712	-0.239026	darkred	lightgreen	blue
MZF1	2.31621	10.6155	0.0416439	0.018919	0.812132	2.62316	2.20763	purple	purple	turquoise
OCEL1	2.30975	11.0601	0.0411976	0.0432367	1.76885	-0.424834	-1.33088	tan	blue	darkred
MYO9B	0.16779	9.03457	0.870444	-0.371321	0.430855	4.69692	4.66716	darkorange	black	darkgrey
KCNK6	1.22986	13.8708	0.239202	-0.201625	0.742572	1.54472	1.27424	magenta	grey	green
PSMD8	-5.72793	9.00891	0.000283044	-1.87366	-0.812832	3.37892	4.72217	blue	yellow	purple
FBXL19	-5.02575	8.40164	0.000879244	-1.49724	-0.560755	2.51413	3.54313	turquoise	red	turquoise
HSD3B7	10.3279	13.1732	1.09586e-07	2.03722	3.11313	0.814882	-1.76029	yellow	brown	orange
SETD1A	1.35153	10.646	0.204545	-0.205798	0.853829	2.43232	2.10831	tan	greenyellow	turquoise
BCL7C	0.314789	8.72387	0.76032	-0.259369	0.342753	2.20187	2.16018	black	green	blue
CIRBP	5.2119	9.80838	0.00042008	0.46251	1.15648	5.23432	4.42482	lightgreen	brown	midnightblue
CBARP	-6.60107	7.91028	0.000177933	-4.12033	-1.98373	-2.03811	1.01392	black	turquoise	red
HNRNPM	0.0321793	12.1171	0.974853	-0.442249	0.455522	4.13564	4.129	blue	salmon	brown
NDUFB7	-4.88276	9.66978	0.000704827	-1.06017	-0.393663	2.52368	3.25059	blue	turquoise	palevioletred3
TECR	-2.06305	13.9075	0.0582965	-0.727121	0.0143502	1.61257	1.96896	turquoise	turquoise	grey60
TIMM13	-7.80855	10.7711	9.33422e-06	-1.9368	-1.08331	1.93367	3.44373	turquoise	turquoise	turquoise
CDC34	-3.042	7.11039	0.0184398	-1.76867	-0.224325	2.85262	3.84911	turquoise	turquoise	palevioletred3
MTAP	-9.32135	13.2558	3.45469e-07	-1.51756	-0.947391	1.78372	3.0162	midnightblue	turquoise	magenta
CEP170B	-2.3847	8.25023	0.0433119	-0.859863	-0.01669	3.52733	3.9656	turquoise	red	brown
POLR2E	-12.2966	10.5641	1.35664e-07	-1.48602	-1.03288	3.42642	4.68587	blue	turquoise	lightpink4
POLRMT	-1.33532	12.1496	0.206249	-0.703348	0.16837	2.48012	2.7476	lightcyan	red	turquoise
RASSF7	-1.91536	10.0852	0.0842069	-1.08252	0.0811005	0.697317	1.19803	black	turquoise	darkgreen
GADD45B	10.6132	11.3931	2.98586e-07	2.85697	4.34408	5.35263	1.7521	brown	blue	red
PALM	4.54698	13.9953	0.000456692	0.681739	1.89918	3.98245	2.69198	salmon	blue	pink
MKNK2	4.85266	10.7725	0.000540027	0.531249	1.41734	5.71349	4.7392	yellow	brown	pink
ARVCF	-1.65008	8.26848	0.136306	-1.31953	0.215158	2.78232	3.33451	lightyellow	black	darkgreen
TRMT2A	-3.28468	8.18203	0.0107698	-0.830477	-0.146935	2.07026	2.55897	turquoise	red	turquoise
RANBP1	-9.98759	13.992	9.53452e-08	-2.06696	-1.33612	2.29228	3.99382	blue	turquoise	magenta
ZDHHC8	-2.1184	9.03936	0.0630698	-1.12691	0.0366078	3.1056	3.65075	pink	red	red
KLHL22	2.96209	13.922	0.0103479	0.119423	0.747404	1.99363	1.56022	royalblue	cyan	tan
MED15	-2.37846	9.07265	0.0411211	-0.791468	-0.0203178	3.49692	3.90282	pink	red	orangered3
SERPIND1	-5.11095	12.6687	0.000216754	-5.59189	-2.26288	-4.04828	-0.120897	blue	turquoise	purple
SNAP29	2.63864	11.5582	0.022222	0.066474	0.712128	2.32744	1.93814	tan	darkred	black
CRKL	-2.76741	10.4833	0.0190769	-0.499968	-0.0555111	4.08329	4.36103	green	turquoise	turquoise
LZTR1	-1.31148	11.9702	0.214295	-0.681388	0.169413	1.81453	2.07052	magenta	red	yellow
MMP11	-2.60441	11.9064	0.0231634	-1.92257	-0.170232	0.305293	1.3517	lightyellow	black	blue
CECR2	4.7772	8.72941	0.00109461	2.34899	6.61285	1.21109	-3.26983	yellow	blue	skyblue
SMARCB1	-8.70213	10.2801	4.63927e-06	-1.11039	-0.659009	2.90815	3.79285	turquoise	turquoise	ivory
BCL2L13	-3.30319	12.5144	0.00598412	-0.477585	-0.0989947	3.27905	3.56734	turquoise	green	turquoise
CABIN1	0.397606	11.6725	0.698096	-0.293341	0.423803	4.00987	3.94463	orange	black	yellow
TBC1D10A	4.94726	10.2765	0.000535626	0.560908	1.4741	1.18757	0.170067	yellow	brown	greenyellow
SF3A1	1.57098	11.6219	0.143	-0.122253	0.746095	4.18905	3.87713	tan	salmon	brown
GGT5	-5.45639	12.7639	0.00011741	-1.80596	-0.780117	1.9444	3.23744	blue	turquoise	lightgreen
RNF215	1.09308	12.4698	0.295024	-0.201817	0.611608	2.22764	2.02275	royalblue	black	darkred
SEC14L2	-0.21606	13.4276	0.832189	-0.527932	0.431653	1.34131	1.38945	blue	turquoise	brown
SPECC1L	-3.8323	7.85582	0.00517576	-0.669174	-0.165386	2.22823	2.64551	pink	turquoise	turquoise
PPIL2	-1.88199	9.54186	0.0906497	-0.68765	0.0601407	2.48153	2.79528	blue	red	plum2
YPEL1	3.05558	11.1745	0.0107557	0.29813	1.82339	0.163632	-0.897128	salmon	cyan	midnightblue
SNRPD3	-6.20755	11.8649	4.76685e-05	-0.996973	-0.478453	3.02523	3.76295	blue	turquoise	purple
PES1	-6.65428	10.6599	4.17987e-05	-1.50653	-0.755434	3.26054	4.39152	blue	turquoise	brown4
MAPK1	-2.47557	8.18993	0.0377174	-0.653699	-0.0244978	4.69736	5.03646	blue	yellow	brown
PPM1F	-6.8632	8.2175	0.000113886	-1.3602	-0.678387	4.79501	5.8143	blue	green	cyan
SLC35E4	-4.40679	8.11546	0.00218874	-1.85514	-0.58264	1.22931	2.4482	turquoise	turquoise	pink
CRYBB2P1	0.582328	9.38174	0.574072	-0.221593	0.376514	0.641377	0.563916	lightcyan	red	turquoise
MFNG	-7.975	13.9308	1.46776e-06	-0.908962	-0.52353	4.50989	5.22614	blue	turquoise	black
CARD10	2.31057	11.7152	0.0399212	0.0247774	0.884925	3.9725	3.51765	salmon	cyan	black
LRP5L	1.78313	13.9107	0.0963901	-0.0804259	0.870687	-0.786558	-1.18169	red	black	green
SLC25A1	-8.2605	13.6896	1.10031e-06	-1.28007	-0.751469	2.66364	3.67941	blue	turquoise	blue
GRK3	4.66685	13.9385	0.000367467	0.895054	2.41854	0.53086	-1.12594	brown	blue	blue
GGA1	-1.53794	8.47993	0.160498	-0.542918	0.105921	3.03718	3.25568	green	red	orange
HIRA	-1.38542	10.8743	0.193684	-0.704869	0.160763	0.31403	0.586083	black	turquoise	turquoise
LGALS1	-11.0434	7.63386	5.78905e-06	-4.05502	-2.64434	4.17817	7.52785	blue	turquoise	brown
HPS4	-0.546781	13.957	0.593164	-0.39514	0.234635	2.48831	2.56856	darkturquoise	black	yellow
PIK3IP1	7.52051	12.4553	5.64431e-06	1.59512	2.88898	3.07797	0.835917	orange	brown	tan
SRRD	-0.584066	9.77534	0.572407	-0.577797	0.338385	1.31028	1.42998	pink	turquoise	turquoise
PATZ1	-0.883208	10.4651	0.396959	-0.357682	0.153739	2.46424	2.56621	lightyellow	black	red
TRIOBP	7.69188	11.9958	5.61979e-06	0.755375	1.35247	5.49034	4.43641	brown	brown	black
TFIP11	-2.26142	9.19959	0.0494489	-0.536462	-0.000799062	2.49643	2.76506	lightcyan	turquoise	turquoise
GCAT	-4.15135	13.3307	0.00108131	-1.20263	-0.380724	0.986489	1.77817	lightcyan	green	red
ANKRD54	-8.63887	13.9194	5.78011e-07	-1.37236	-0.826216	1.29472	2.394	turquoise	turquoise	turquoise
EIF3L	-0.330167	7.75361	0.750017	-0.434592	0.326258	4.56838	4.62255	grey60	darkturquoise	tan
SNU13	-2.34632	12.1234	0.036761	-0.659584	-0.0247873	3.67447	4.01666	green	yellow	turquoise
MICALL1	-3.36939	7.99367	0.00980578	-1.18288	-0.221555	3.39922	4.10144	turquoise	red	turquoise
CCDC134	-1.19866	10.3005	0.257511	-0.781114	0.233259	-0.463592	-0.189665	blue	turquoise	royalblue
DEPDC5	1.34763	11.5915	0.203528	-0.0883636	0.371981	1.05819	0.916386	magenta	black	darkgreen
PICK1	4.93299	13.2177	0.000260583	0.604679	1.54419	1.55649	0.48206	brown	brown	turquoise
TTC28	7.32117	12.9774	5.88046e-06	0.840037	1.54351	4.50616	3.31438	yellow	brown	black
CENPM	-6.68652	8.19644	0.00013863	-6.2589	-3.05882	-4.04281	0.616052	blue	turquoise	brown
TPTEP1	2.34262	12.4433	0.0365142	0.0976717	2.5569	-0.204422	-1.53171	grey	blue	plum1
KDELR3	-1.63832	10.9675	0.129696	-0.910177	0.13355	2.3646	2.75292	cyan	tan	darkgrey
DDX17	5.83455	13.3305	5.27447e-05	0.363702	0.789701	7.35677	6.78007	purple	blue	yellow
TCF20	2.5471	10.9781	0.027172	0.0270645	0.371898	3.61682	3.41733	red	grey	midnightblue
HSCB	-1.15359	9.52806	0.276783	-0.757725	0.243058	-0.550205	-0.292871	black	yellow	green
CBY1	1.31981	13.9346	0.208172	-0.127115	0.533368	0.896382	0.693256	magenta	cyan	tan
TOMM22	-5.71006	9.86044	0.000206254	-1.27126	-0.556627	2.84715	3.76109	blue	turquoise	darkturquoise
XBP1	4.76742	11.0577	0.000574692	0.340481	0.923786	4.60931	3.97717	red	blue	darkgrey
RTCB	-4.24962	8.24969	0.0026116	-1.12444	-0.336069	3.7163	4.44655	blue	turquoise	lavenderblush3
JOSD1	-1.02744	7.72016	0.335325	-0.508773	0.196514	4.22161	4.37774	green	yellow	cyan
FBXO7	1.10347	7.22356	0.30522	-0.495248	1.37217	4.6273	4.18884	darkred	lightgreen	yellow
GTPBP1	4.50814	12.1859	0.000689752	0.288148	0.825448	4.12039	3.56359	purple	brown	blue
POLDIP3	-0.377507	11.4467	0.712703	-0.287169	0.202741	3.41408	3.4563	turquoise	turquoise	grey60
RAB36	-1.01045	13.4307	0.33014	-1.09081	0.39405	-0.405447	-0.0570655	green	red	brown
TIMP3	7.89302	13.4499	2.07929e-06	3.35523	5.87229	2.68915	-1.92461	greenyellow	blue	red
PPP6R2	-1.71538	9.53442	0.118524	-0.567232	0.0756047	3.59446	3.84027	darkturquoise	red	paleturquoise
SBF1	-3.34067	8.73403	0.00902245	-0.954201	-0.181541	4.10133	4.6692	lightcyan	red	red
SUN2	4.3648	9.93677	0.00143182	0.31528	0.973997	4.71308	4.06844	salmon	brown	skyblue
CYB5R3	4.57185	12.5854	0.000568478	0.444474	1.24594	5.57514	4.72993	tan	greenyellow	lightsteelblue1
DNAL4	1.60355	12.6166	0.133542	-0.0872827	0.584031	1.4445	1.19612	royalblue	cyan	blue
LMF2	-0.236386	9.69471	0.818053	-0.325267	0.263112	3.91869	3.94977	green	red	blue
RHBDD3	-2.81297	7.28583	0.0249852	-1.1438	-0.103544	1.33982	1.96349	lightcyan	red	turquoise
PACSIN2	2.43208	9.6961	0.0360334	0.0285964	0.68678	3.88946	3.53177	royalblue	brown	brown
TTLL1	0.512689	9.34261	0.62007	-0.381333	0.606455	0.343268	0.230707	salmon	cyan	mediumpurple3
AP1B1	-11.1106	13.9959	2.50436e-08	-1.75288	-1.18562	3.75109	5.22034	blue	turquoise	blue
HMGXB4	-2.06262	13.6956	0.0586487	-0.546448	0.0112423	1.91668	2.18428	blue	turquoise	brown
TOM1	1.79292	9.19537	0.105868	-0.0744169	0.652094	2.53105	2.24221	royalblue	cyan	skyblue1
NEFH	-4.19253	8.04059	0.00299344	-3.83147	-1.11382	-3.21792	-0.745277	turquoise	turquoise	maroon
CHKB	-1.7187	7.84354	0.124742	-1.46328	0.216017	-1.16555	-0.541923	green	red	yellow
HMOX1	-7.40072	7.3791	0.00011487	-4.77455	-2.48042	0.269532	3.89702	turquoise	turquoise	brown4
MCAT	-5.34362	13.3438	0.000122073	-0.925932	-0.39378	0.709327	1.36918	turquoise	turquoise	turquoise
THOC5	-7.59754	8.37263	4.95061e-05	-1.2811	-0.68803	2.79447	3.77904	green	turquoise	lightpink4
MCM5	-10.9193	13.9487	3.22538e-08	-2.78376	-1.86945	2.08388	4.41048	blue	turquoise	brown
ARSA	-4.41301	11.8879	0.000864896	-1.83347	-0.620577	1.07458	2.3016	black	green	darkseagreen4
TSPO	-6.03229	7.91237	0.000325867	-1.68519	-0.751792	4.10732	5.32581	blue	turquoise	blue
TTLL12	-12.6011	13.6793	6.50979e-09	-2.38743	-1.69162	1.79618	3.83571	blue	turquoise	violet
CBX7	14.1096	13.9896	1.15153e-09	3.31542	4.50415	2.35609	-1.5537	yellow	blue	tan
PDGFB	-6.41131	10.0515	7.54277e-05	-2.27821	-1.1037	2.81765	4.50861	turquoise	green	darkgreen
RPL3	2.60059	13.4102	0.0215393	0.0686355	0.730139	7.24427	6.84488	lightgreen	brown	blue
ZMAT5	-1.9703	9.86854	0.077489	-0.877343	0.0546698	-0.320115	0.091222	black	turquoise	red
RBFOX2	-1.40573	8.91783	0.193676	-0.334617	0.0783537	5.17778	5.30591	red	royalblue	blue
SYNGR1	7.07272	13.6981	6.28555e-06	1.69665	3.17792	1.86845	-0.568829	yellow	blue	saddlebrown
TAB1	-0.163241	12.8018	0.872877	-0.323709	0.278292	2.09843	2.12114	black	black	lightyellow
ASCC2	0.0968399	7.85137	0.92528	-0.726399	0.789864	2.91206	2.88033	darkred	lightgreen	brown
MTMR3	9.14752	12.0282	9.13092e-07	1.19499	1.94197	1.40204	-0.166441	magenta	brown	navajowhite2
MIEF1	-5.29817	8.83737	0.000525907	-1.12957	-0.45227	2.35739	3.14831	turquoise	turquoise	royalblue
APOL1	9.11116	7.89071	1.85105e-05	2.35103	3.94954	4.02444	0.874158	yellow	blue	black
MYH9	2.82544	10.751	0.0168462	0.119263	0.970868	8.94041	8.39534	purple	brown	blue
SAMM50	-6.58254	12.5709	2.0766e-05	-1.07546	-0.542578	2.1126	2.92162	turquoise	turquoise	blue
TXN2	-2.82277	13.9944	0.0135629	-0.533875	-0.0728542	2.73871	3.04207	turquoise	turquoise	darkorange
FOXRED2	-4.30237	9.44488	0.00177436	-1.89605	-0.595405	0.258018	1.50375	pink	turquoise	darkorange
EIF3D	-3.57045	13.993	0.00307572	-0.841364	-0.20986	5.1354	5.66101	green	turquoise	blue
TNRC6B	6.91035	9.83418	4.5042e-05	0.712978	1.39385	4.96638	3.91297	purple	blue	greenyellow
SGSM3	-0.218495	8.36414	0.832281	-0.889893	0.734786	-0.753529	-0.675976	darkturquoise	red	turquoise
IFT27	-0.994988	13.9979	0.336632	-0.707284	0.259015	1.6267	1.85083	lightyellow	black	blue
KIAA0930	-5.24276	8.8425	0.000564366	-1.32798	-0.52589	2.38448	3.31142	turquoise	green	blue
CSF2RB	15.9634	12.5867	9.98456e-10	2.86867	3.77012	6.68249	3.3631	brown	blue	green
SLC25A17	-2.24769	13.8347	0.0414428	-0.82053	-0.0187634	1.30427	1.72392	blue	yellow	brown
FAM118A	1.59726	13.6654	0.133066	-0.359221	2.43635	3.16827	2.12971	purple	brown	floralwhite
KCTD17	-4.09917	8.5392	0.00299572	-1.04361	-0.29742	1.86779	2.5383	turquoise	green	ivory
ST13	2.07626	9.98602	0.0646409	-0.0170966	0.483228	4.44658	4.21352	red	blue	mediumpurple3
RBX1	-3.8348	10.883	0.00282495	-1.20527	-0.325521	2.3345	3.09989	blue	yellow	blue
EP300	4.04786	11.0811	0.00189443	0.281701	0.951817	4.59221	3.97545	yellow	blue	yellow
L3MBTL2	-2.87166	10.4064	0.0160032	-0.744685	-0.0959037	2.41535	2.83564	green	red	brown
RANGAP1	-8.76434	12.5507	1.05282e-06	-2.31033	-1.39392	3.26448	5.11661	lightcyan	turquoise	royalblue
ZC3H7B	-0.898882	9.36737	0.391236	-0.470913	0.201948	5.04662	5.18111	green	red	bisque4
PHF5A	-6.18372	10.1966	9.53402e-05	-1.72229	-0.811635	0.839508	2.10647	blue	yellow	magenta
ACO2	-2.55606	11.0542	0.026615	-0.600215	-0.0449799	2.84375	3.16634	black	red	blue
POLR3H	-1.51987	13.6942	0.151292	-0.901104	0.154579	2.09535	2.46861	turquoise	turquoise	turquoise
TRMU	-3.71914	7.99041	0.00589119	-1.31452	-0.308178	1.95134	2.76269	blue	turquoise	magenta
PMM1	-0.0757661	9.32929	0.941205	-0.7348	0.686926	-0.553812	-0.529875	blue	turquoise	blue
DESI1	-5.69431	10.9227	0.000143143	-1.25908	-0.556653	3.09247	4.00034	blue	turquoise	magenta
CERK	-7.15849	8.99738	5.32504e-05	-1.9309	-1.00354	3.85041	5.31763	turquoise	green	bisque4
BRD1	1.64464	7.7599	0.139832	-0.100176	0.589177	3.03398	2.78948	grey	black	darkgreen
ZBED4	-6.56377	8.58546	0.000128232	-1.07944	-0.523059	2.43115	3.2324	turquoise	green	steelblue
HDAC10	-1.39995	8.06322	0.198809	-1.29368	0.315455	-1.20415	-0.715045	black	red	brown
ABHD4	4.49219	11.821	0.000764293	0.535795	1.54835	2.76053	1.71845	yellow	brown	darkorange
KHNYN	-1.02622	9.34595	0.330615	-0.564361	0.210749	3.57195	3.74876	black	red	midnightblue
FKBP3	-6.58443	9.30207	8.68202e-05	-1.30995	-0.642478	1.05658	2.03279	pink	yellow	brown
SDR39U1	1.43192	9.28147	0.184968	-0.19745	0.887196	-0.810495	-1.15537	magenta	purple	green
RBM23	7.96364	13.8391	1.55885e-06	0.395982	0.688331	4.00361	3.46146	purple	blue	pink
PRMT5	-4.51483	13.8583	0.000497346	-1.01119	-0.359443	2.16421	2.84953	turquoise	turquoise	magenta
AP4S1	4.81593	13.1206	0.000328491	0.375649	0.985816	1.06114	0.380408	brown	blue	darkslateblue
POLE2	-4.23679	10.3807	0.00158748	-3.13506	-0.981084	-1.47273	0.585339	blue	turquoise	brown
VCPKMT	0.765097	12.7845	0.458105	-0.518185	1.08497	-0.350898	-0.634292	grey60	pink	turquoise
SOS2	3.70354	11.2097	0.00337277	0.217755	0.852131	3.39235	2.8574	greenyellow	brown	darkred
CDKL1	-1.58064	7.32477	0.156078	-2.33489	0.453924	-1.77013	-0.829644	turquoise	turquoise	brown
NIN	-5.01672	9.34801	0.000643691	-0.976857	-0.372042	3.8835	4.55795	green	turquoise	brown
PYGL	-3.21507	8.50998	0.0113679	-2.13584	-0.362459	2.11208	3.36123	blue	turquoise	brown
PSMC6	-2.9177	13.8693	0.0113327	-0.832574	-0.126754	2.62091	3.10057	green	yellow	purple
GNPNAT1	-8.94916	13.0002	6.41908e-07	-2.09067	-1.27757	0.631413	2.31553	pink	turquoise	magenta
DDHD1	2.30154	12.7016	0.0389802	0.0200138	0.657353	2.18961	1.85093	red	grey	red
CDKN3	-10.2788	10.6227	7.51951e-07	-4.65667	-3.00825	-2.56653	1.26592	blue	turquoise	brown
CNIH1	0.458055	10.4035	0.656331	-0.40954	0.622905	3.36538	3.2587	greenyellow	pink	orange
CGRRF1	1.90741	13.4852	0.077993	-0.0461061	0.763777	0.422654	0.0638184	greenyellow	pink	turquoise
ATP6V1D	-3.14798	9.25699	0.0113774	-1.00514	-0.166641	2.2827	2.86859	turquoise	turquoise	darkolivegreen
PLEK2	-4.33676	7.71817	0.00270881	-5.79647	-1.75528	-3.9262	-0.150316	turquoise	turquoise	brown4
PIGH	6.70361	13.7529	1.09986e-05	0.8156	1.58494	0.846248	-0.354021	white	blue	green
PSMA3	-6.15483	9.68769	0.000123128	-1.6972	-0.792089	2.44071	3.68536	blue	yellow	brown
VTI1B	0.12062	7.1684	0.907303	-0.441405	0.489097	2.79394	2.7701	pink	lightcyan	blue
TIMM9	-0.900802	8.67236	0.392022	-0.71653	0.310081	0.710077	0.913301	pink	yellow	black
GSTZ1	-3.11223	12.7696	0.00840657	-1.26801	-0.227788	0.0469474	0.794846	blue	turquoise	brown
KIAA0586	-1.32061	11.579	0.21214	-0.547333	0.135268	2.28713	2.49316	green	tan	darkturquoise
TMED8	-3.85366	10.741	0.00280105	-0.884271	-0.240165	2.43142	2.99364	midnightblue	yellow	red
AHSA1	-3.57474	11.7057	0.00396443	-1.12977	-0.27262	3.2974	3.99859	green	turquoise	darkturquoise
DAAM1	0.955083	11.7682	0.358744	-0.271977	0.694869	2.94436	2.73292	grey	grey	steelblue
SPTLC2	6.74134	12.8548	1.46158e-05	0.631176	1.2275	5.65097	4.72163	brown	blue	black
RIN3	4.02933	12.2686	0.00160055	0.537451	1.7964	1.95664	0.789721	tan	brown	skyblue2
LGMN	-0.773675	10.6952	0.455884	-0.576094	0.277195	3.46877	3.61822	grey	green	blue
ALKBH1	-3.01782	7.8627	0.0169518	-1.33658	-0.176708	0.283827	1.04047	cyan	yellow	turquoise
SNW1	-2.62695	8.40388	0.0290898	-0.551643	-0.03818	3.24575	3.54066	blue	turquoise	pink
ITPK1	2.69887	12.5633	0.0186963	0.0634054	0.58132	2.98386	2.6615	tan	salmon	skyblue
DHRS7	1.41182	9.35468	0.190391	-0.226848	0.99182	1.85907	1.47658	magenta	lightyellow	blue
PPM1A	3.26438	9.04608	0.00970401	0.30921	1.70154	3.41926	2.41389	darkred	orange	yellow
SIX4	-4.8755	7.96535	0.0012468	-1.58676	-0.56721	-0.535089	0.541898	black	green	red
CEP128	-5.92953	12.5513	5.76346e-05	-1.9962	-0.927203	-0.730358	0.731345	blue	turquoise	brown
ERH	-4.90555	9.50153	0.000717813	-1.83719	-0.683897	2.26315	3.52369	cyan	yellow	brown
HIF1A	1.61198	7.37674	0.148812	-0.192727	1.04578	5.75539	5.32886	greenyellow	blue	green
SUSD6	10.437	11.5308	3.20049e-07	1.31299	2.0098	4.42897	2.76757	yellow	blue	indianred4
SRSF5	6.99751	10.3974	3.05069e-05	0.636769	1.22725	5.45218	4.52017	purple	brown	blue
EIF5	-6.00666	12.4846	5.21301e-05	-1.26251	-0.592516	4.52499	5.45251	blue	turquoise	brown
DICER1	5.45524	13.9321	8.62327e-05	0.289424	0.664733	4.19268	3.7156	purple	blue	midnightblue
ZFYVE21	5.87544	8.85901	0.000251125	0.401984	0.907316	3.28645	2.6318	brown	blue	blue
MTHFD1	-7.21953	12.9566	6.88072e-06	-1.58671	-0.855618	2.35486	3.57602	blue	turquoise	brown
ZC3H14	-2.30137	11.8729	0.0403129	-0.430057	-0.0115092	3.24806	3.46885	midnightblue	yellow	grey60
TELO2	-0.828518	9.56599	0.427565	-0.901808	0.415125	2.18821	2.43155	turquoise	red	blue
PCNX1	9.39798	11.2923	1.1203e-06	0.761988	1.22614	4.71913	3.72507	brown	blue	yellow
GSKIP	-1.47334	13.32	0.163894	-0.899348	0.168981	1.24408	1.60926	cyan	yellow	red
VRK1	-2.31757	9.62216	0.0439069	-1.83726	-0.0312465	1.17567	2.10992	blue	yellow	purple
PSMC1	-4.76746	11.2301	0.000550524	-1.43583	-0.530363	0.625843	1.60894	green	turquoise	turquoise
PAPLN	3.09097	13.4167	0.00832243	0.364709	2.04046	0.829371	-0.373215	red	blue	lightgreen
RPS6KA5	8.23247	12.3197	2.34862e-06	1.20577	2.07033	1.92231	0.284259	yellow	brown	midnightblue
PPP4R3A	-1.02135	12.7004	0.326151	-0.292989	0.105193	3.21564	3.30954	pink	tan	grey60
C14orf93	3.56095	13.1458	0.0034269	0.244589	0.996983	0.469876	-0.15091	yellow	brown	black
PSMB5	-9.63453	8.75582	5.94173e-06	-1.54827	-0.95743	3.65546	4.90831	blue	turquoise	darkolivegreen
YY1	2.28005	9.20084	0.04795	0.00195447	0.348973	4.33011	4.15464	tan	blue	green
ACIN1	0.176944	8.79989	0.863558	-0.308061	0.360146	4.88811	4.86207	red	midnightblue	turquoise
CCNB1IP1	-0.0806207	12.7089	0.936999	-0.327283	0.303787	2.15982	2.17157	green	yellow	yellow
TRIP11	4.00199	9.6801	0.00267864	0.269668	0.954043	4.00101	3.38915	darkgreen	magenta	green
APEX1	-9.07814	8.45665	1.20847e-05	-1.11188	-0.664787	3.56278	4.45112	blue	turquoise	blue
PABPN1	-2.55405	9.97507	0.0287158	-1.20899	-0.0821907	1.85036	2.49595	black	turquoise	turquoise
ARHGAP5	5.35912	10.1008	0.000308686	0.590225	1.42834	4.00215	2.99286	yellow	blue	green
CINP	-4.72469	9.49207	0.000935097	-0.776587	-0.276385	1.65531	2.18179	blue	turquoise	brown
SRP54	-4.10055	11.7457	0.00153647	-1.11008	-0.338518	2.64146	3.36576	cyan	yellow	darkgrey
CHD8	-4.93771	12.8648	0.00027975	-0.419539	-0.163968	4.39446	4.68621	green	turquoise	turquoise
PCK2	6.95025	11.7217	1.73982e-05	0.86418	1.65645	2.32161	1.0613	purple	blue	orange
KIAA0391	1.46244	11.5139	0.170375	-0.0909203	0.456902	0.464879	0.281888	grey	grey	greenyellow
DCAF11	3.89332	8.44963	0.00412756	0.302462	1.16173	3.16933	2.43723	yellow	brown	black
PSMA6	-1.88664	8.02195	0.0958195	-1.6622	0.165867	-1.0238	-0.275637	cyan	yellow	orangered4
NFKBIA	12.9554	8.30011	8.54187e-07	3.12089	4.4622	6.65613	2.86458	yellow	blue	green
EMC9	-5.05531	13.0893	0.000215793	-1.54679	-0.621024	-0.575942	0.507965	turquoise	turquoise	skyblue3
PSME2	0.374583	13.9026	0.713622	-0.295659	0.420685	2.89696	2.83444	red	grey	darkturquoise
BRMS1L	1.64729	12.768	0.123874	-0.139264	1.0266	-0.155018	-0.598686	magenta	pink	yellow
REC8	4.27052	13.9338	0.000784577	0.636323	1.92153	0.691643	-0.587282	brown	blue	lightcyan1
TM9SF1	-4.6846	10.0451	0.00085109	-0.870245	-0.309475	-0.633307	-0.0434467	black	turquoise	turquoise
SEC23A	-3.99771	11.1183	0.00205103	-0.864248	-0.25102	4.80672	5.36436	blue	yellow	bisque4
GMPR2	-0.445372	12.2819	0.6638	-0.31818	0.20995	3.21182	3.26594	green	royalblue	green
PNN	-0.915041	8.93126	0.38421	-0.470535	0.199731	3.58905	3.72445	green	turquoise	turquoise
RABGGTA	-3.78802	12.0082	0.0025825	-0.916906	-0.247315	1.53542	2.11753	turquoise	red	turquoise
NFATC4	-1.41797	11.2373	0.183331	-0.724049	0.155772	3.53965	3.82379	darkorange	black	violet
PLTP	4.46828	9.52136	0.00135546	0.729244	2.19989	4.22047	2.7559	yellow	brown	ivory
PCIF1	2.75807	11.1482	0.0184138	0.0966433	0.854215	2.3137	1.83827	tan	greenyellow	yellow
GSS	-11.0483	8.8043	1.86041e-06	-1.45364	-0.958142	1.91612	3.122	blue	turquoise	brown4
TRPC4AP	-3.81695	9.46947	0.00374346	-0.570929	-0.148029	4.32135	4.68083	lightcyan	red	darkgrey
PYGB	-5.42328	9.67942	0.000326605	-0.959216	-0.398774	4.06809	4.74708	lightcyan	red	black
ABHD12	-3.17601	12.4621	0.00764724	-0.697444	-0.131262	2.02709	2.44144	turquoise	turquoise	skyblue
PROCR	5.45211	10.8471	0.000210338	0.610578	1.43968	6.35288	5.32775	brown	blue	white
GINS1	-12.7168	13.6136	6.12998e-09	-5.11687	-3.63659	-2.16456	2.21217	blue	turquoise	brown
NINL	3.06133	10.5989	0.0112708	0.224142	1.39012	3.22231	2.41518	orange	cyan	paleturquoise
CD40	4.55981	12.834	0.000553006	0.576167	1.61629	2.45942	1.36319	lightgreen	brown	blue
UQCC1	-2.31102	8.70089	0.0471044	-0.552469	-0.00445197	2.05333	2.33179	blue	turquoise	orangered4
ZMYND8	-0.335098	8.82645	0.745377	-0.358736	0.266409	4.56896	4.61513	grey	midnightblue	green
IFT52	1.45048	9.43466	0.179344	-0.110642	0.513922	2.22247	2.02083	yellow	grey60	blue
MYBL2	-12.6523	9.11964	4.3264e-07	-6.14961	-4.28727	-1.26144	3.957	blue	turquoise	brown
NDRG3	-3.65034	7.34736	0.00751562	-1.35385	-0.295552	1.87574	2.70044	cyan	yellow	darkturquoise
C20orf24	-3.54908	8.78671	0.00646694	-1.55133	-0.340814	-0.318586	0.627487	black	green	magenta
NFATC2	4.59811	10.8089	0.000802955	0.731588	2.08062	3.18274	1.77663	yellow	brown	lightcyan
PABPC1L	-0.000559713	13.2999	0.999562	-0.614484	0.614165	-1.07204	-1.07188	green	salmon	green
STK4	3.1672	9.70151	0.0104102	0.144184	0.838161	3.34791	2.85673	red	blue	yellowgreen
ADNP	3.19182	10.4847	0.00908583	0.156394	0.86488	3.57354	3.0629	tan	greenyellow	yellow
PFDN4	-3.27211	12.3698	0.00643559	-1.36138	-0.275216	0.765558	1.58386	cyan	tan	skyblue2
DOK5	9.41957	13.991	1.9595e-07	2.68145	4.26269	1.5672	-1.90486	white	blue	grey60
CSTF1	-5.17281	10.0782	0.000407084	-0.859233	-0.34225	1.96939	2.57013	blue	yellow	yellow
RAE1	-11.7322	11.2067	1.22393e-07	-1.59225	-1.09016	1.41099	2.7522	blue	turquoise	magenta
TPD52L2	-4.34274	13.5115	0.000731213	-0.678904	-0.22899	4.28447	4.73842	blue	turquoise	bisque4
DNAJC5	-6.41016	7.95054	0.000212467	-1.41045	-0.663542	4.07399	5.11099	lightcyan	turquoise	red
NELFCD	-6.83969	12.107	1.7181e-05	-0.868336	-0.449079	2.89199	3.5507	blue	turquoise	turquoise
CTSZ	4.60983	12.5269	0.00053766	0.274366	0.761855	5.128	4.60989	brown	blue	blue
PRPF6	4.47371	8.63433	0.00171447	0.397812	1.2224	4.63607	3.82596	brown	brown	green
PRELID3B	-2.28866	8.41407	0.0498202	-1.3227	-0.000653593	2.11299	2.77467	cyan	yellow	turquoise
MTG2	-2.16726	7.99813	0.0620909	-0.551154	0.017106	1.3351	1.60212	turquoise	turquoise	yellow
PSMA7	-7.20071	11.6459	1.28111e-05	-1.46372	-0.781925	3.78644	4.90926	blue	turquoise	brown
SLCO4A1	1.7535	9.06729	0.113168	-0.208455	1.65293	1.32262	0.600381	magenta	grey	green
NTSR1	-4.54697	10.198	0.00101139	-6.49752	-2.23136	-4.05642	0.308018	turquoise	turquoise	lightcyan1
MRGBP	-8.57254	11.7872	2.08621e-06	-1.2504	-0.742792	1.59409	2.59068	turquoise	turquoise	turquoise
TCFL5	-0.735482	10.006	0.478931	-0.396051	0.199463	1.20091	1.29921	magenta	black	orange
DIDO1	-0.763442	9.47224	0.46379	-0.363888	0.179208	4.15173	4.24407	darkturquoise	black	yellow
GID8	0.505325	9.97524	0.624308	-0.204297	0.324091	3.40598	3.34608	lightyellow	green	mediumpurple3
SLC17A9	-9.98447	9.35163	2.71107e-06	-2.99482	-1.89358	1.10287	3.54707	lightcyan	turquoise	royalblue
ARFGAP1	-2.96073	7.79411	0.0186608	-1.09059	-0.1331	3.64217	4.25401	lightcyan	red	red
EEF1A2	18.3739	12.8488	1.32485e-10	3.86894	4.90137	4.15938	-0.225768	yellow	blue	plum1
GMEB2	-1.59072	11.5457	0.138665	-0.57732	0.0913004	1.85374	2.09675	pink	turquoise	turquoise
C20orf27	-12.4231	13.9102	6.44402e-09	-1.85638	-1.30948	1.55291	3.13583	turquoise	turquoise	brown
CDC25B	-4.41831	9.86303	0.00134154	-1.10543	-0.363338	2.68265	3.41704	turquoise	turquoise	greenyellow
RNF24	-0.258317	11.0109	0.800927	-0.624397	0.493214	1.84126	1.90685	magenta	grey	green
ARFRP1	-1.39263	7.29162	0.204722	-0.613587	0.156417	3.10677	3.33536	darkturquoise	red	yellow
NDUFAF5	-3.66201	12.3544	0.00310809	-1.43237	-0.36586	-0.0457622	0.853353	turquoise	turquoise	turquoise
TRIB3	-10.0663	7.47511	1.30578e-05	-4.80719	-2.99725	-0.542729	3.35949	turquoise	turquoise	magenta
RASSF2	-4.65927	9.7329	0.000962444	-4.14971	-1.458	1.74231	4.54616	turquoise	green	red
CSNK2A1	-8.70437	8.56577	1.54082e-05	-1.02346	-0.598623	3.89817	4.70922	green	turquoise	darkorange2
CDS2	2.37423	10.8691	0.0371289	0.0233306	0.628311	4.18593	3.86011	yellow	brown	blue
HM13	0.359309	11.8497	0.725685	-0.41428	0.577626	3.56951	3.48783	pink	salmon	grey60
SNPH	0.789456	10.6348	0.447089	-0.249917	0.527649	1.32224	1.18338	salmon	black	tan
MYLK2	-4.81444	13.0279	0.000335961	-4.71048	-1.79288	-4.94408	-1.6924	turquoise	turquoise	cyan
SEC23B	-2.27974	12.7751	0.0404668	-0.61646	-0.0160217	2.79911	3.11535	blue	turquoise	turquoise
CCM2L	8.69734	9.7607	6.61455e-06	1.67419	2.83262	2.40028	0.146877	yellow	blue	black
PLCB4	23.9359	13.8436	1.1607e-12	4.17741	5.00069	3.38843	-1.20062	yellow	blue	black
MYL9	17.7418	12.8306	2.08874e-10	3.7374	4.77536	6.03803	1.78165	brown	blue	violet
TM9SF4	2.47791	12.2216	0.0287491	0.0338774	0.519351	4.22208	3.94546	brown	greenyellow	green
CRNKL1	2.06776	11.4198	0.0620949	-0.0135684	0.468298	2.85834	2.63097	red	magenta	ivory
POFUT1	-1.37815	13.3048	0.190895	-0.332936	0.0732305	3.83715	3.96701	green	turquoise	brown
SAMHD1	1.20904	8.64875	0.258659	-0.232389	0.758943	2.92354	2.66027	magenta	grey	coral2
KIF3B	9.012	13.925	3.47803e-07	0.375367	0.609993	4.01614	3.52346	lightgreen	brown	blue
NOP56	-9.48394	13.9403	1.85881e-07	-1.79906	-1.13521	3.10377	4.57091	green	turquoise	magenta
MANBAL	1.23667	12.0322	0.239804	-0.27416	0.99439	1.21898	0.858865	tan	salmon	brown
IDH3B	-4.91356	8.78083	0.000894233	-0.841545	-0.309563	3.07107	3.64662	green	turquoise	turquoise
MAPRE1	-4.34387	12.0811	0.000940467	-0.864978	-0.287396	3.92897	4.50515	midnightblue	yellow	magenta
JAG1	6.00475	13.995	3.23317e-05	0.663038	1.39991	5.56742	4.53594	purple	blue	darkmagenta
CDK5RAP1	-3.37086	13.0359	0.0049979	-0.767471	-0.168061	1.73926	2.20703	green	turquoise	magenta
SNTA1	-1.36338	9.4527	0.204348	-0.805748	0.19699	-0.184869	0.11951	blue	turquoise	brown
TTI1	-3.41629	13.9461	0.00419597	-0.471095	-0.107632	2.35329	2.64265	green	turquoise	blue
E2F1	-6.5935	9.26496	8.74962e-05	-4.43118	-2.17464	-1.35118	1.95173	blue	turquoise	brown
RPRD1B	6.59169	12.28	2.29604e-05	0.526677	1.0448	2.64498	1.85924	brown	blue	blue
PXMP4	7.19267	13.9405	4.73055e-06	1.09804	2.03166	0.95575	-0.609097	brown	blue	blue
CHMP4B	2.47151	9.33109	0.0346033	0.0589851	1.25715	3.08299	2.42492	tan	greenyellow	blue
CST3	0.789136	9.14406	0.450009	-0.205612	0.42673	4.40065	4.29009	lightgreen	cyan	mediumorchid
ACTR5	-2.28704	9.81377	0.0457112	-0.759691	-0.00893215	0.551629	0.93594	blue	turquoise	brown
AHCY	-9.31965	12.9546	4.16429e-07	-1.79903	-1.12173	3.05263	4.51301	blue	turquoise	brown
PPP1R16B	-0.770678	13.9348	0.453767	-0.762263	0.359397	4.79749	4.99893	lightyellow	black	tan
FAM83D	-11.1828	8.94008	1.48151e-06	-5.78645	-3.83761	-2.05243	2.7596	blue	turquoise	brown
DHX35	-3.99358	12.4192	0.00166891	-0.736827	-0.217894	0.994428	1.47179	blue	turquoise	blue
DNTTIP1	1.15951	12.8916	0.267275	-0.183635	0.608339	1.17444	0.962089	tan	salmon	brown
MAP1LC3A	2.18386	12.6611	0.0484254	0.00395763	0.978093	1.09739	0.606361	salmon	cyan	tan
PIGU	-2.76221	12.4495	0.0167116	-0.744156	-0.0893306	1.08307	1.49981	blue	turquoise	magenta
ACOT8	0.415076	13.5327	0.684592	-0.345823	0.511131	1.24173	1.15908	black	black	yellow
APMAP	-3.2634	8.83096	0.0100355	-0.594433	-0.106873	4.12195	4.4726	turquoise	turquoise	plum2
ZNF516	0.799768	13.4195	0.437774	-0.335789	0.732543	2.39921	2.20084	salmon	cyan	darkgreen
ADNP2	-2.60799	11.9613	0.0229378	-0.535167	-0.0478867	2.71535	3.00688	green	yellow	blue
RBFA	-4.29906	9.31649	0.00184045	-1.12215	-0.350986	0.847017	1.58359	green	turquoise	brown4
USP14	0.842137	13.9975	0.413869	-0.330659	0.758175	2.40759	2.19383	pink	tan	purple
VAPA	3.17325	8.99754	0.0113106	0.140374	0.837546	4.9381	4.44914	red	pink	darkorange2
METTL4	-0.830689	12.7589	0.421422	-0.490628	0.218488	0.219939	0.356009	pink	tan	brown
LPIN2	-0.392205	8.14809	0.704967	-0.771323	0.546482	2.83422	2.94664	magenta	lightgreen	green
SMCHD1	2.84381	12.1028	0.0146831	0.130141	0.979513	4.29602	3.7412	purple	blue	black
MYL12A	-4.04969	8.94718	0.00292156	-1.02303	-0.289303	5.10998	5.76615	green	yellow	steelblue
CEP76	-3.48516	8.56163	0.00743088	-1.47017	-0.307346	-0.0359514	0.852804	turquoise	turquoise	turquoise
CEP192	5.49133	13.9695	8.00775e-05	0.439318	1.00262	3.94883	3.22786	purple	blue	brown
RNMT	3.59863	13.9486	0.0029219	0.15596	0.616513	2.98034	2.59411	magenta	brown	yellow
SMAD7	12.5292	9.19506	4.35861e-07	3.75593	5.40453	4.55314	-0.0270897	yellow	blue	ivory
LIPG	-6.91299	12.9258	1.09693e-05	-5.44602	-2.85147	-0.697391	3.45135	blue	green	brown
RNF125	7.13367	12.7249	8.62411e-06	1.93021	3.61245	1.7086	-1.06274	yellow	blue	pink
ANKRD12	11.6052	11.4713	1.09333e-07	1.49406	2.1891	3.98486	2.14329	yellow	blue	darkred
POLI	3.20294	13.4294	0.0066816	0.221044	1.12806	2.15206	1.47751	yellow	magenta	red
MIB1	0.71795	13.4498	0.485073	-0.191448	0.383004	4.42662	4.33085	red	grey60	midnightblue
RBBP8	-0.116605	10.8206	0.909309	-0.627669	0.56463	1.4022	1.43372	midnightblue	tan	indianred4
RIOK3	1.63772	7.33933	0.143508	-0.324528	1.83245	3.94663	3.19267	darkred	orange	pink
CSTF2	-6.37554	13.4363	2.0883e-05	-1.35321	-0.669921	0.979444	1.99101	blue	turquoise	magenta
PSMD10	-7.79088	12.9301	3.08826e-06	-1.61245	-0.912037	1.97829	3.24054	turquoise	turquoise	antiquewhite4
ATG4A	-11.7361	13.5177	1.80866e-08	-2.02557	-1.39784	1.10185	2.81356	turquoise	turquoise	orangered4
STS	1.36624	13.3517	0.194435	-0.147933	0.66067	1.62794	1.37157	magenta	pink	pink
TBL1X	-3.09649	10.131	0.0111513	-0.795329	-0.130381	2.28094	2.7438	turquoise	turquoise	brown
GPR143	-3.2183	12.0137	0.00736787	-1.68515	-0.324663	-0.048154	0.956751	black	green	cyan
PGRMC1	5.22922	12.5908	0.000180609	0.47302	1.14277	4.15822	3.35033	purple	blue	brown
POLA1	-1.86615	9.05096	0.0946933	-0.544464	0.0519957	2.37181	2.61804	green	yellow	brown
MID1	8.62971	10.6135	4.03332e-06	1.09005	1.84092	4.35483	2.88935	yellow	blue	green
NKAP	3.89704	12.6633	0.00192475	0.199688	0.69953	1.02872	0.57911	magenta	brown	blue
NXT2	-0.984226	8.20275	0.353141	-1.96992	0.78782	-1.25396	-0.662913	grey60	yellow	darkolivegreen
ALG13	2.63754	11.7465	0.0220069	0.0785445	0.835076	2.20048	1.74367	brown	brown	bisque4
PRPS2	-4.6853	13.8549	0.000360521	-1.44459	-0.536716	0.931566	1.92222	blue	turquoise	brown
MOSPD1	-1.08905	7.18539	0.311302	-2.6609	0.976765	0.222168	1.06424	cyan	lightcyan	turquoise
AMMECR1	-6.64441	13.9152	1.14038e-05	-1.18131	-0.604521	0.545024	1.43794	pink	turquoise	brown
WDR13	0.498897	12.8155	0.626305	-0.231659	0.370517	3.78648	3.71705	red	black	blue
SUV39H1	-9.58966	11.0038	1.11889e-06	-2.98226	-1.86888	-1.13527	1.2903	blue	turquoise	brown
SRPX	-6.93107	8.76935	7.75255e-05	-2.81304	-1.42444	2.83981	4.95855	blue	turquoise	brown
XIAP	3.82326	13.0124	0.00210853	0.243881	0.877425	3.41745	2.85679	greenyellow	blue	green
STAG2	-0.234291	12.1738	0.818653	-0.384713	0.309902	4.13466	4.17206	grey60	pink	green
ATP11C	-3.88251	10.9044	0.00259364	-1.01063	-0.278846	3.13362	3.77835	pink	yellow	green
ABCD1	0.140633	10.2143	0.890895	-0.277936	0.315498	1.91017	1.89139	lightyellow	black	cyan
CCDC22	-0.0100841	9.71871	0.992158	-0.361032	0.357791	1.71487	1.71649	green	green	brown
PLP2	-6.33759	12.0851	3.61411e-05	-2.14016	-1.04573	2.51483	4.10777	blue	turquoise	brown
BMX	9.11541	11.0326	1.8102e-06	0.889453	1.45544	5.80795	4.63551	purple	blue	blue
PLS3	-9.32978	9.46186	4.46004e-06	-1.75187	-1.07219	5.38433	6.79636	blue	turquoise	thistle1
NAA10	1.0035	9.33868	0.340913	-0.246102	0.642441	2.75927	2.5611	grey	black	pink
RENBP	1.49028	12.5618	0.160827	-0.30574	1.65025	-0.894947	-1.5672	magenta	cyan	lightyellow
ELF4	1.18224	8.86784	0.267839	-0.141478	0.449777	3.50018	3.34603	magenta	grey	blue
SMARCA1	2.6149	13.1872	0.0211895	0.0956802	0.997726	3.36776	2.82106	magenta	brown	yellow
ASB9	-1.87188	13.4154	0.0831859	-0.952251	0.0666407	-0.738037	-0.295232	blue	turquoise	brown
RBBP7	-6.07411	10.6746	9.11025e-05	-1.29383	-0.603688	3.1302	4.07896	blue	yellow	brown
KCND1	11.3086	13.9727	2.03642e-08	3.48955	5.12336	1.27658	-3.02988	yellow	blue	greenyellow
SLC25A14	-3.00616	7.48247	0.018275	-1.68602	-0.212195	-0.73881	0.210299	cyan	yellow	turquoise
FMR1	2.66765	11.0627	0.0217904	0.0978989	1.01772	2.48606	1.92824	greenyellow	pink	darkturquoise
PIM2	2.05678	7.30239	0.0770768	-0.110126	1.68233	1.13553	0.349425	darkred	lightgreen	turquoise
SLC35A2	0.694242	10.2388	0.502978	-0.205851	0.393044	2.09293	1.99933	pink	turquoise	red
PQBP1	-2.45062	9.95403	0.0343243	-0.362532	-0.0171257	2.53031	2.72014	blue	turquoise	greenyellow
EMD	-2.83817	11.7086	0.015269	-0.692464	-0.0900668	2.15474	2.546	pink	turquoise	lightpink4
TAZ	1.89327	11.5388	0.0836624	-0.0389753	0.538835	2.42819	2.17826	red	purple	salmon4
PGK1	-4.87669	8.46366	0.0010454	-1.02916	-0.372593	5.52354	6.22442	green	turquoise	steelblue
MAGT1	2.00452	10.9752	0.0703164	-0.035215	0.751574	4.33908	3.9809	greenyellow	pink	lightsteelblue1
SMS	-25.2009	11.449	2.17824e-11	-2.72025	-2.28517	1.18306	3.68577	blue	turquoise	salmon
PHEX	-14.3609	12.2496	4.96356e-09	-6.07763	-4.47953	-5.71076	-0.432178	turquoise	green	blue
UBL4A	-4.96882	13.5349	0.000227771	-0.716623	-0.283517	2.45077	2.95084	blue	turquoise	red
CD99L2	5.60836	13.7321	6.93218e-05	0.420881	0.943683	4.2889	3.60662	lightgreen	brown	blue
EEA1	-1.1021	9.18346	0.298462	-0.626296	0.215118	3.00902	3.2146	pink	tan	pink
RP2	-1.54089	11.1103	0.151328	-0.880858	0.154873	1.85929	2.22228	pink	yellow	turquoise
JADE3	-2.93667	11.789	0.0126583	-0.901775	-0.132722	1.27284	1.79009	black	turquoise	blue
CDK16	-9.63758	12.6875	3.37473e-07	-1.28968	-0.816393	3.46021	4.51325	turquoise	turquoise	salmon
USP11	7.72947	13.8566	2.1768e-06	0.882757	1.56171	3.54887	2.32663	yellow	blue	red
HTATSF1	0.0642165	13.9887	0.949707	-0.29076	0.308707	2.62937	2.62039	black	turquoise	turquoise
TIMP1	12.1813	13.5169	1.13965e-08	2.42999	3.47281	6.58509	3.63369	brown	blue	white
KLHL4	-11.9681	12.0367	4.82741e-08	-3.42221	-2.36838	-0.0168763	2.87842	turquoise	green	green
GABRE	-4.24172	12.1493	0.00111357	-1.15304	-0.371173	1.5366	2.2987	red	red	turquoise
FGD1	2.83589	11.9826	0.0150296	0.108316	0.827151	2.44376	1.97603	tan	brown	yellow
PIN4	-2.66439	13.3459	0.0191175	-1.45336	-0.153716	-0.364173	0.439365	cyan	yellow	purple
PORCN	2.27918	13.2663	0.0398063	0.0188395	0.678176	1.17842	0.829908	darkorange	purple	coral2
MAGED2	5.66702	12.4609	9.05173e-05	0.565099	1.26637	6.17097	5.25523	orange	cyan	darkgreen
RBM3	-2.19549	13.031	0.046837	-1.03895	-0.00850375	4.68613	5.20985	green	yellow	blue
KLF8	10.8601	10.6554	4.27514e-07	3.46863	5.24073	2.2023	-2.15238	white	blue	pink
SRPX2	1.19354	11.2277	0.257267	-0.243617	0.823983	4.97683	4.68665	red	brown	red
SYTL4	4.65072	8.99018	0.00120438	0.415831	1.20374	3.15471	2.34493	yellow	blue	grey60
CENPI	-11.2526	10.9638	2.31612e-07	-4.31243	-2.90094	-1.67688	1.9298	blue	turquoise	brown
PBDC1	-3.3861	11.8906	0.0054729	-0.978948	-0.211902	0.430453	1.02588	pink	turquoise	turquoise
GLA	0.158683	10.7056	0.876872	-0.41961	0.48458	1.83851	1.80602	green	yellow	darkolivegreen
ARMCX3	4.38126	13.4657	0.000685221	0.401076	1.17599	3.80721	3.01868	greenyellow	blue	green
BEX4	3.56445	13.4426	0.003296	0.351929	1.42578	2.015	1.12614	salmon	brown	black
NALCN	1.52189	10.3807	0.157898	-0.240242	1.29205	1.20118	0.675278	red	brown	lightpink4
NDFIP2	-0.721565	11.1764	0.485384	-0.67952	0.343493	1.02679	1.1948	pink	yellow	red
FNDC3A	5.77943	8.08767	0.000398265	0.643262	1.49471	5.15779	4.0888	brown	magenta	greenyellow
CDADC1	3.99322	10.7182	0.00222048	0.384248	1.3348	-0.101364	-0.960889	greenyellow	blue	grey60
CAB39L	-2.21739	8.61781	0.0550742	-1.24034	0.0165984	-0.0721246	0.539746	black	green	yellowgreen
STK24	1.87626	8.93287	0.0936081	-0.0566035	0.603355	3.93307	3.65969	magenta	lightyellow	lightgreen
ACP5	4.87171	8.96918	0.000890196	2.23681	6.11868	1.15159	-3.02615	yellow	blue	pink
DNAJC3	2.82	12.8738	0.0145809	0.105908	0.802602	4.68008	4.22583	yellow	blue	darkmagenta
UGGT2	2.4377	10.571	0.0337771	0.0496808	1.02318	2.88648	2.35005	darkgreen	magenta	saddlebrown
ARHGEF7	0.0403851	13.9814	0.968357	-0.402176	0.417611	4.1117	4.10398	magenta	midnightblue	lightcyan
PARP4	-3.78922	12.3525	0.00245569	-0.637958	-0.173081	3.9455	4.35101	green	yellow	brown
SUPT20H	-4.07137	9.95342	0.00226695	-0.975472	-0.285139	2.68164	3.31194	blue	yellow	royalblue
MRPS31	1.36864	11.6113	0.197008	-0.158185	0.687333	1.44556	1.18099	red	yellow	brown
SLC25A15	-5.64587	10.7386	0.000163833	-1.90645	-0.834669	-0.446792	0.923767	blue	turquoise	brown
KPNA3	-3.21576	9.7116	0.00958642	-1.14568	-0.205612	2.52229	3.19794	pink	tan	darkolivegreen
FLT1	-4.5086	13.1783	0.000568731	-1.36269	-0.480642	4.67456	5.59623	black	green	brown
RGCC	-4.67499	7.86734	0.00166513	-3.80292	-1.28557	-0.313472	2.23077	black	turquoise	red
VWA8	0.297958	13.6633	0.770218	-0.373002	0.493035	1.70546	1.64545	midnightblue	tan	lavenderblush3
[truncated: 10,069 more rows]

## Sheet: CvEL
	Name	statistic.t	parameter.df	p.value	conf.int1	conf.int2	estimate.mean.of.x	estimate.mean.of.y	log10fold	modules.all	modules.CEL	modules.flow
CCNB2	cyclin B2	-33.0473	18.7328	4.52936e-18	-4.97188	-4.37907	-1.56869	3.10679	-4.67548	blue	turquoise	brown
CCNA2	cyclin A2	-28.2182	20.7406	4.99512e-18	-5.64388	-4.86855	-1.2663	3.98991	-5.25621	blue	turquoise	brown
SMS	spermine synthase	-26.6164	11.3057	1.48436e-11	-2.79517	-2.36949	1.18306	3.76538	-2.58233	blue	turquoise	salmon
VEPH1	ventricular zone expressed PH domain containing 1	-25.1437	8.11963	5.4342e-09	-6.35382	-5.28877	-1.30026	4.52104	-5.8213	turquoise	turquoise	royalblue
CENPO	centromere protein O	-24.6651	15.449	7.91589e-14	-3.99271	-3.35901	-1.01203	2.66384	-3.67586	turquoise	turquoise	purple
POLH	DNA polymerase eta	-24.5189	19.0707	6.96405e-16	-1.74751	-1.47269	1.37666	2.98677	-1.6101	turquoise	turquoise	darkturquoise
CEP55	centrosomal protein 55	-24.1653	16.0958	4.46617e-14	-6.2292	-5.22488	-1.86281	3.86423	-5.72704	blue	turquoise	brown
TK1	thymidine kinase 1	-24.1515	21.7414	3.41147e-17	-4.34762	-3.65957	-0.170738	3.83286	-4.0036	blue	turquoise	brown
HMGA2	high mobility group AT-hook 2	-23.5719	18.2698	3.9404e-15	-4.56069	-3.81497	0.364221	4.55205	-4.18783	turquoise	turquoise	brown
KIFC1	kinesin family member C1	-22.9789	12.4238	1.4866e-11	-5.24791	-4.34203	-1.39918	3.39579	-4.79497	blue	turquoise	brown
RRM2	ribonucleotide reductase regulatory subunit M2	-22.2058	21.0915	4.12944e-16	-6.11947	-5.07167	-2.14793	3.44764	-5.59557	turquoise	turquoise	brown
LINC01013	long intergenic non-protein coding RNA 1013	-21.906	11.5406	9.21956e-11	-6.86274	-5.61607	-3.38197	2.85744	-6.23941	turquoise	turquoise	darkgreen
FEN1	flap structure-specific endonuclease 1	-21.5465	17.8895	3.02566e-14	-4.31453	-3.54758	-0.643652	3.2874	-3.93105	blue	turquoise	brown
NCAPD2	non-SMC condensin I complex subunit D2	-21.4599	19.9174	3.07765e-15	-2.34047	-1.92567	2.65625	4.78932	-2.13307	blue	turquoise	brown
FJX1	four jointed box 1	-21.4452	19.1827	7.22704e-15	-1.8952	-1.55835	0.978018	2.70479	-1.72677	turquoise	turquoise	steelblue
PRR11	proline rich 11	-21.3287	9.69268	1.80453e-09	-5.72262	-4.63584	-1.58849	3.59074	-5.17923	blue	turquoise	brown
CDCA7L	cell division cycle associated 7 like	-20.9291	9.02253	5.87722e-09	-3.83963	-3.09082	0.289037	3.75426	-3.46522	turquoise	turquoise	salmon
UHRF1	ubiquitin like with PHD and ring finger domains 1	-20.8278	12.0995	7.58538e-11	-5.43521	-4.40659	-1.84857	3.07233	-4.9209	blue	turquoise	brown
KPNB1	karyopherin subunit beta 1	-20.7162	18.8398	2.01072e-14	-1.51786	-1.23915	5.00173	6.38023	-1.3785	blue	turquoise	brown
PIMREG		-20.6989	12.2635	6.54504e-11	-5.66531	-4.58853	-2.84037	2.28654	-5.12692	blue	turquoise	brown
HMGA1	high mobility group AT-hook 1	-20.6616	10.9029	4.31638e-10	-4.96756	-4.01017	2.82911	7.31798	-4.48887	turquoise	turquoise	brown
CDCA2	cell division cycle associated 2	-20.6589	10.5033	7.59682e-10	-5.66055	-4.56483	-2.28033	2.83236	-5.11269	blue	turquoise	brown
MDM2	MDM2 proto-oncogene	-20.5604	19.9388	6.80901e-15	-2.70332	-2.20523	3.16714	5.62142	-2.45427	blue	turquoise	brown
HIST1H2AG	histone cluster 1 H2A family member g	-20.5558	13.1025	2.35054e-11	-4.76164	-3.8566	0.760831	5.06995	-4.30912	green	turquoise	orangered4
C19orf48	chromosome 19 open reading frame 48	-20.4997	14.8663	2.6018e-12	-2.51007	-2.03693	1.76495	4.03846	-2.2735	blue	turquoise	mediumpurple2
ADK	adenosine kinase	-20.4306	17.0267	2.0474e-13	-2.829	-2.29946	-0.189117	2.37511	-2.56423	turquoise	turquoise	purple
HIST1H2BN	histone cluster 1 H2B family member n	-20.0571	19.9074	1.12971e-14	-2.2491	-1.82524	0.402185	2.43936	-2.03717	green	turquoise	turquoise
PSMD2	proteasome 26S subunit, non-ATPase 2	-19.7647	19.7586	1.74891e-14	-2.11944	-1.71449	4.20014	6.11711	-1.91696	blue	turquoise	purple
TPX2	TPX2, microtubule nucleation factor	-19.5671	13.5474	2.52533e-11	-5.16512	-4.14177	0.426424	5.07987	-4.65344	blue	turquoise	brown
CDCA7	cell division cycle associated 7	-19.1474	11.4483	4.72881e-10	-5.07908	-4.03626	-2.44926	2.1084	-4.55767	blue	turquoise	brown
BUB1B	BUB1 mitotic checkpoint serine/threonine kinase B	-19.0402	10.581	1.57987e-09	-5.67187	-4.49134	-1.69704	3.38456	-5.08161	blue	turquoise	brown
PCCB	propionyl-CoA carboxylase beta subunit	-18.9731	21.5058	6.49489e-15	-1.17755	-0.945211	1.70318	2.76456	-1.06138	blue	turquoise	blue
TOMM40	translocase of outer mitochondrial membrane 40	-18.9517	21.7029	5.47368e-15	-2.36798	-1.90051	1.66827	3.80251	-2.13424	blue	turquoise	magenta
MAP4K4	mitogen-activated protein kinase kinase kinase kinase 4	-18.9169	21.9061	4.65968e-15	-2.19248	-1.75915	5.10001	7.07582	-1.97582	turquoise	turquoise	brown
MCM4	minichromosome maintenance complex component 4	-18.7811	17.9289	3.06711e-13	-3.75569	-2.99979	1.24252	4.62026	-3.37774	blue	turquoise	brown
CHEK1	checkpoint kinase 1	-18.6714	13.5626	4.57989e-11	-3.1892	-2.53021	-0.065714	2.79399	-2.85971	blue	turquoise	brown
DKK1	dickkopf WNT signaling pathway inhibitor 1	-18.4775	16.3701	2.15217e-12	-6.90098	-5.48281	-2.25898	3.93292	-6.1919	turquoise	turquoise	turquoise
LRP8	LDL receptor related protein 8	-18.2021	16.8792	1.57692e-12	-3.15714	-2.50095	0.693161	3.52221	-2.82905	blue	turquoise	darkolivegreen
PPP1R14BP3	protein phosphatase 1 regulatory inhibitor subunit 14B pseudogene 3	-18.1521	19.3167	1.34039e-13	-2.22497	-1.76538	0.321928	2.3171	-1.99518	green	turquoise	maroon
KIF20A	kinesin family member 20A	-18.1413	9.75535	7.69213e-09	-6.08093	-4.74655	-0.869928	4.54381	-5.41374	blue	turquoise	brown
BUB3	BUB3, mitotic checkpoint protein	-18.0992	21.8902	1.1775e-14	-1.71844	-1.36502	3.22754	4.76927	-1.54173	blue	turquoise	magenta
UBE2S	ubiquitin conjugating enzyme E2 S	-18.0645	17.3221	1.11841e-12	-3.1326	-2.47822	0.58382	3.38923	-2.80541	blue	turquoise	purple
CDCA8	cell division cycle associated 8	-18.0261	11.9397	5.034e-10	-5.32122	-4.17301	-1.56781	3.1793	-4.74711	blue	turquoise	brown
BAX	BCL2 associated X, apoptosis regulator	-17.9926	12.6782	2.10547e-10	-2.73505	-2.14731	1.70556	4.14674	-2.44118	turquoise	turquoise	green
GTSE1	G2 and S-phase expressed 1	-17.9849	13.8612	5.29252e-11	-5.08416	-3.99984	-2.03022	2.51178	-4.542	blue	turquoise	brown
DLGAP5	DLG associated protein 5	-17.9141	9.2768	1.64354e-08	-6.35593	-4.93641	-1.33621	4.30996	-5.64617	blue	turquoise	brown
MCM2	minichromosome maintenance complex component 2	-17.8559	13.0803	1.43838e-10	-4.08018	-3.19992	0.610757	4.25081	-3.64005	blue	turquoise	brown
UBE2C	ubiquitin conjugating enzyme E2 C	-17.7722	10.1881	5.31534e-09	-5.46354	-4.24891	-2.01065	2.84557	-4.85622	blue	turquoise	brown
SLC1A1	solute carrier family 1 member 1	-17.7072	13.8051	6.94059e-11	-4.80566	-3.76604	-1.39219	2.89366	-4.28585	turquoise	turquoise	lightcyan
RNPEP	arginyl aminopeptidase	-17.7053	21.9139	1.81092e-14	-1.49504	-1.18146	2.45739	3.79564	-1.33825	turquoise	turquoise	black
PCNA	proliferating cell nuclear antigen	-17.6662	19.4881	1.86292e-13	-2.87559	-2.26731	1.74196	4.31341	-2.57145	blue	turquoise	brown
CIT	citron rho-interacting serine/threonine kinase	-17.5988	11.1558	1.72867e-09	-4.02012	-3.1277	-0.585102	2.98881	-3.57391	blue	turquoise	brown
GYS1	glycogen synthase 1	-17.427	17.9218	1.10595e-12	-1.43485	-1.12602	2.72356	4.004	-1.28043	blue	turquoise	brown
SNRPA	small nuclear ribonucleoprotein polypeptide A	-17.3911	10.8714	2.79116e-09	-1.91298	-1.48262	1.62865	3.32645	-1.6978	turquoise	turquoise	purple
SAE1	SUMO1 activating enzyme subunit 1	-17.3499	11.3672	1.5577e-09	-1.79447	-1.39184	3.51152	5.10467	-1.59315	lightcyan	turquoise	turquoise
DTYMK	deoxythymidylate kinase	-17.2765	19.096	4.08129e-13	-2.37123	-1.85893	1.38754	3.50262	-2.11508	blue	turquoise	brown
BUB1	BUB1 mitotic checkpoint serine/threonine kinase	-17.2676	10.5317	4.58671e-09	-5.41148	-4.182	-1.35032	3.44642	-4.79674	blue	turquoise	brown
APLN	apelin	-17.1948	21.9557	3.17852e-14	-7.39168	-5.80039	-1.24025	5.35579	-6.59604	turquoise	turquoise	lightcyan
CFL1	cofilin 1	-17.1049	9.60808	1.62341e-08	-1.48203	-1.13874	5.87229	7.18268	-1.31038	blue	turquoise	blue
NEK2	NIMA related kinase 2	-16.9277	8.99882	3.93733e-08	-5.59435	-4.27537	-3.3126	1.62226	-4.93486	blue	turquoise	brown
FGF16	fibroblast growth factor 16	-16.8622	14.6249	5.47583e-11	-7.02395	-5.44438	-5.80288	0.43129	-6.23417	turquoise	turquoise	turquoise
NQO1	NAD(P)H quinone dehydrogenase 1	-16.8318	9.55943	2.00684e-08	-5.32855	-4.07581	0.264663	4.96684	-4.70218	blue	turquoise	pink
CDK2AP1	cyclin dependent kinase 2 associated protein 1	-16.6904	13.2635	2.74318e-10	-1.79396	-1.38351	2.17076	3.7595	-1.58874	turquoise	turquoise	red
NCAPG2	non-SMC condensin II complex subunit G2	-16.6382	21.2357	1.1658e-13	-2.7691	-2.15416	0.719375	3.181	-2.46163	blue	turquoise	brown
TENM3	teneurin transmembrane protein 3	-16.543	11.7521	1.67849e-09	-5.40938	-4.14771	-3.21644	1.5621	-4.77855	turquoise	turquoise	turquoise
H2AFZ	H2A histone family member Z	-16.5153	15.9913	1.80555e-11	-2.71245	-2.0953	2.89314	5.29701	-2.40387	blue	turquoise	purple
BIRC5	baculoviral IAP repeat containing 5	-16.3346	8.31219	1.31182e-07	-6.28593	-4.73955	-1.75272	3.76002	-5.51274	blue	turquoise	brown
NME4	NME/NM23 nucleoside diphosphate kinase 4	-16.2087	10.4798	9.29282e-09	-2.39781	-1.82139	2.1965	4.3061	-2.1096	turquoise	turquoise	thistle2
PPP2R5D	protein phosphatase 2 regulatory subunit B'delta	-16.202	17.31	6.74073e-12	-1.12617	-0.86698	2.19199	3.18856	-0.996577	turquoise	turquoise	brown
AXL	AXL receptor tyrosine kinase	-16.1908	10.848	6.07795e-09	-3.96461	-3.01427	2.58138	6.07082	-3.48944	blue	turquoise	magenta
PLK1	polo like kinase 1	-16.1755	9.71275	2.40076e-08	-5.82717	-4.41119	-1.35021	3.76897	-5.11918	blue	turquoise	brown
GAS2L3	growth arrest specific 2 like 3	-16.1656	8.5432	1.05608e-07	-3.82832	-2.88164	-1.11197	2.24302	-3.35498	turquoise	turquoise	salmon
TUBA1B	tubulin alpha 1b	-16.1578	15.1029	6.09658e-11	-2.21536	-1.69927	3.40021	5.35752	-1.95732	blue	turquoise	brown
HNRNPUL1	heterogeneous nuclear ribonucleoprotein U like 1	-16.0846	10.4942	9.87358e-09	-0.968846	-0.734399	4.85756	5.70918	-0.851623	turquoise	turquoise	brown
TTK	TTK protein kinase	-16.0771	11.2837	3.94941e-09	-5.32467	-4.04577	-2.14554	2.53968	-4.68522	blue	turquoise	brown
CDC45	cell division cycle 45	-16.0035	17.6958	5.74978e-12	-3.02408	-2.32145	0.142461	2.81523	-2.67277	blue	turquoise	brown
ARHGAP18	Rho GTPase activating protein 18	-15.7992	16.2782	2.67998e-11	-2.91553	-2.22653	2.23517	4.8062	-2.57103	turquoise	turquoise	red
CCNF	cyclin F	-15.7318	9.82729	2.71639e-08	-4.38992	-3.2984	-0.0182078	3.82596	-3.84416	blue	turquoise	brown
POP1	POP1 homolog, ribonuclease P/MRP subunit	-15.7172	12.9381	8.27369e-10	-3.41505	-2.58933	0.0313203	3.03351	-3.00219	blue	turquoise	purple
CENPN	centromere protein N	-15.6205	16.501	2.58632e-11	-3.40066	-2.58969	-0.690808	2.30437	-2.99518	turquoise	turquoise	purple
CHAF1B	chromatin assembly factor 1 subunit B	-15.5164	19.3186	2.30103e-12	-2.79104	-2.12822	-0.68282	1.77681	-2.45963	blue	turquoise	brown
PSMD11	proteasome 26S subunit, non-ATPase 11	-15.5096	21.9406	2.62564e-13	-1.5297	-1.16881	3.37673	4.72598	-1.34926	blue	turquoise	magenta
IGF2BP3	insulin like growth factor 2 mRNA binding protein 3	-15.507	7.92063	3.29911e-07	-5.55153	-4.11198	-1.0176	3.81416	-4.83176	turquoise	turquoise	brown
TRAPPC2L	trafficking protein particle complex 2 like	-15.475	15.5369	7.43247e-11	-1.30075	-0.986645	1.51227	2.65597	-1.1437	turquoise	turquoise	brown
TDP1	tyrosyl-DNA phosphodiesterase 1	-15.4206	16.2788	3.88304e-11	-2.28766	-1.73537	0.687555	2.69907	-2.01152	blue	turquoise	turquoise
GINS1	GINS complex subunit 1	-15.4186	11.2478	6.46508e-09	-5.26823	-3.95514	-2.16456	2.44712	-4.61169	blue	turquoise	brown
INCENP	inner centromere protein	-15.3611	20.0269	1.51619e-12	-2.06619	-1.57216	1.39715	3.21633	-1.81918	blue	turquoise	magenta
WDR62	WD repeat domain 62	-15.3283	12.57	1.65502e-09	-4.83486	-3.63671	-2.21441	2.02138	-4.23579	blue	turquoise	purple
ZWINT	ZW10 interacting kinetochore protein	-15.3157	10.9572	9.59999e-09	-4.88556	-3.6573	-0.740926	3.53051	-4.27143	blue	turquoise	brown
RALA	RAS like proto-oncogene A	-15.2575	17.3736	1.6885e-11	-3.09542	-2.34443	1.72945	4.44937	-2.71993	turquoise	turquoise	salmon
NRCAM	neuronal cell adhesion molecule	-15.215	8.83555	1.21767e-07	-7.47276	-5.5335	-1.94164	4.56149	-6.50313	turquoise	turquoise	brown
GLRX3	glutaredoxin 3	-15.1879	19.297	3.43822e-12	-1.33773	-1.01398	2.40932	3.58518	-1.17585	turquoise	turquoise	darkturquoise
ARHGAP24	Rho GTPase activating protein 24	-15.1338	8.40124	2.17394e-07	-5.32805	-3.92913	-0.0866113	4.54198	-4.62859	turquoise	turquoise	magenta
JPT1		-15.1197	10.1736	2.6539e-08	-2.51544	-1.87058	2.58326	4.77626	-2.19301	blue	turquoise	brown
RFWD3	ring finger and WD repeat domain 3	-15.0609	19.5825	3.15022e-12	-1.79547	-1.35809	2.04166	3.61844	-1.57678	blue	turquoise	skyblue3
CDC20	cell division cycle 20	-15.0519	9.18799	8.74202e-08	-6.8233	-5.04514	-1.55204	4.38217	-5.93422	blue	turquoise	brown
C20orf27	chromosome 20 open reading frame 27	-15.0474	14.2656	3.76404e-10	-1.82651	-1.37148	1.55291	3.1519	-1.599	turquoise	turquoise	brown
NAV3	neuron navigator 3	-14.9898	9.38918	7.14902e-08	-6.26052	-4.62768	-1.82535	3.61875	-5.4441	blue	turquoise	brown
PFN1	profilin 1	-14.986	12.1817	3.24578e-09	-1.94972	-1.45546	5.06063	6.76322	-1.70259	blue	turquoise	purple
CENPF	centromere protein F	-14.9774	8.8203	1.41868e-07	-4.6835	-3.45105	0.672111	4.73938	-4.06727	blue	turquoise	darkturquoise
XRCC2	X-ray repair cross complementing 2	-14.8165	10.2749	2.88667e-08	-5.10451	-3.77414	-3.22289	1.21644	-4.43933	blue	turquoise	brown
CDC6	cell division cycle 6	-14.8029	12.2029	3.66174e-09	-5.8139	-4.32441	-1.92049	3.14866	-5.06915	blue	turquoise	brown
TMEM171	transmembrane protein 171	-14.8005	8.24173	3.16818e-07	-7.29732	-5.33858	-6.001	0.316951	-6.31795	turquoise	turquoise	orangered4
GDF15	growth differentiation factor 15	-14.7967	10.8755	1.50651e-08	-6.44602	-4.77463	-1.22776	4.38256	-5.61032	turquoise	turquoise	turquoise
FSD1	fibronectin type III and SPRY domain containing 1	-14.7584	11.9421	4.96985e-09	-7.57459	-5.62487	-5.02427	1.57546	-6.59973	turquoise	turquoise	grey
CKS2	CDC28 protein kinase regulatory subunit 2	-14.7222	10.2081	3.31192e-08	-4.5457	-3.35349	-1.12881	2.82078	-3.94959	turquoise	turquoise	magenta
LMNB2	lamin B2	-14.7203	11.1248	1.21437e-08	-2.72016	-2.01337	3.29767	5.66444	-2.36677	blue	turquoise	purple
CHAF1A	chromatin assembly factor 1 subunit A	-14.6937	13.3455	1.26393e-09	-3.11001	-2.31455	-0.0844653	2.62781	-2.71228	blue	turquoise	brown
NACC1	nucleus accumbens associated 1	-14.6898	8.38536	2.82291e-07	-2.11815	-1.54731	2.53195	4.36468	-1.83273	turquoise	turquoise	palevioletred3
CEP170	centrosomal protein 170	-14.6791	16.8668	4.89922e-11	-2.0302	-1.51967	2.99161	4.76655	-1.77494	midnightblue	turquoise	royalblue
PUS7	pseudouridylate synthase 7 (putative)	-14.6394	11.9865	5.2041e-09	-1.3758	-1.01929	2.07119	3.26873	-1.19754	blue	turquoise	darkorange2
CKAP5	cytoskeleton associated protein 5	-14.6022	13.5945	1.07294e-09	-1.61569	-1.20083	3.85775	5.26601	-1.40826	blue	turquoise	brown
UCHL1	ubiquitin C-terminal hydrolase L1	-14.5772	9.28692	1.03521e-07	-5.44789	-3.99012	0.595686	5.31469	-4.719	turquoise	turquoise	darkorange2
STEAP1B	STEAP family member 1B	-14.5193	10.9189	1.75042e-08	-4.00804	-2.95201	-1.06181	2.41822	-3.48003	blue	turquoise	darkturquoise
TTLL12	tubulin tyrosine ligase like 12	-14.4954	12.3078	4.1994e-09	-2.39508	-1.77066	1.79618	3.87905	-2.08287	blue	turquoise	violet
MCM5	minichromosome maintenance complex component 5	-14.4585	13.6607	1.14295e-09	-2.93648	-2.17628	2.08388	4.64026	-2.55638	blue	turquoise	brown
CLSPN	claspin	-14.4263	15.3081	2.5411e-10	-4.85357	-3.60589	-1.71207	2.51766	-4.22973	blue	turquoise	brown
TXNRD1	thioredoxin reductase 1	-14.3694	20.1948	4.55408e-12	-2.46046	-1.837	4.46739	6.61612	-2.14873	green	turquoise	magenta
ITGA6	integrin subunit alpha 6	-14.3577	20.4161	3.89673e-12	-4.29391	-3.20574	1.65473	5.40455	-3.74982	turquoise	turquoise	cyan
ASPM	abnormal spindle microtubule assembly	-14.3499	9.96319	5.57013e-08	-5.56342	-4.06729	-0.485239	4.33011	-4.81535	blue	turquoise	brown
HIST1H2BJ	histone cluster 1 H2B family member j	-14.3498	9.45447	9.84513e-08	-4.67598	-3.41048	0.41492	4.45815	-4.04323	green	turquoise	turquoise
TOP2A	topoisomerase (DNA) II alpha	-14.3489	9.02447	1.61132e-07	-5.17653	-3.76711	0.595484	5.06731	-4.47182	blue	turquoise	brown
ZMYND19	zinc finger MYND-type containing 19	-14.3434	9.95085	5.67104e-08	-2.15916	-1.5782	0.405602	2.27429	-1.86868	turquoise	turquoise	red
CCNB1	cyclin B1	-14.311	9.14034	1.44292e-07	-5.64536	-4.10734	-0.113082	4.76326	-4.87635	blue	turquoise	brown
RAP2B	RAP2B, member of RAS oncogene family	-14.2677	13.308	1.89831e-09	-1.60228	-1.18172	2.58801	3.98002	-1.392	turquoise	turquoise	yellowgreen
LINC00704	long intergenic non-protein coding RNA 704	-14.2645	12.4655	4.32942e-09	-7.64102	-5.62333	-4.03219	2.59998	-6.63217	turquoise	turquoise	salmon
PAICS	phosphoribosylaminoimidazole carboxylase; phosphoribosylaminoimidazolesuccinocarboxamide synthase	-14.2625	13.6786	1.33943e-09	-2.73233	-2.01661	2.85839	5.23286	-2.37447	blue	turquoise	purple
PSMD3	proteasome 26S subunit, non-ATPase 3	-14.1661	11.2983	1.52399e-08	-1.68812	-1.23536	3.59048	5.05222	-1.46174	blue	turquoise	purple
MSANTD3	Myb/SANT DNA binding domain containing 3	-14.1436	8.23846	4.56497e-07	-2.39872	-1.72909	0.918425	2.98233	-2.0639	turquoise	turquoise	turquoise
DHCR24	24-dehydrocholesterol reductase	-14.1333	16.8513	8.98598e-11	-4.50118	-3.33118	1.02012	4.9363	-3.91618	blue	turquoise	darkturquoise
IMMT	inner membrane mitochondrial protein	-14.1247	10.4086	4.00174e-08	-1.38011	-1.00574	3.04436	4.23729	-1.19293	turquoise	turquoise	brown
KIF23	kinesin family member 23	-14.0818	9.82147	7.78445e-08	-4.83882	-3.51391	-0.734743	3.44162	-4.17637	blue	turquoise	brown
ANLN	anillin actin binding protein	-14.073	9.94691	6.82735e-08	-5.65119	-4.10535	0.165748	5.04402	-4.87827	blue	turquoise	brown
FBXO5	F-box protein 5	-14.0488	15.5242	3.07093e-10	-3.54422	-2.61283	-1.06888	2.00964	-3.07852	blue	turquoise	brown
TRIP13	thyroid hormone receptor interactor 13	-14.0348	8.81165	2.48923e-07	-5.89443	-4.25343	-1.72187	3.35206	-5.07393	blue	turquoise	brown
WDCP	WD repeat and coiled coil containing	-14.0277	9.67513	9.47605e-08	-2.07214	-1.50186	0.203222	1.99022	-1.787	turquoise	turquoise	turquoise
DCXR	dicarbonyl and L-xylulose reductase	-14.0128	19.6646	1.0832e-11	-1.57372	-1.16551	1.15397	2.52359	-1.36962	blue	turquoise	mediumpurple2
POC1A	POC1 centriolar protein A	-13.9525	9.53783	1.15811e-07	-3.80594	-2.75179	-1.61581	1.66305	-3.27886	blue	turquoise	brown
DHFR	dihydrofolate reductase	-13.9371	13.8746	1.50372e-09	-3.63346	-2.66359	-1.89836	1.25017	-3.14852	blue	turquoise	brown
CD274	CD274 molecule	-13.9351	12.8823	3.81722e-09	-3.08807	-2.25843	-0.787584	1.88567	-2.67325	blue	turquoise	turquoise
DIAPH3	diaphanous related formin 3	-13.9253	18.3617	3.33124e-11	-3.90494	-2.88237	-1.00721	2.38645	-3.39366	blue	turquoise	brown
EMC1	ER membrane protein complex subunit 1	-13.9156	15.0505	5.3301e-10	-1.03901	-0.763063	3.83996	4.74099	-0.901034	blue	turquoise	purple
RFC5	replication factor C subunit 5	-13.9097	21.2793	3.72693e-12	-1.70258	-1.26	0.466568	1.94786	-1.48129	blue	turquoise	brown
CENPE	centromere protein E	-13.9043	12.6607	4.84712e-09	-4.91556	-3.59035	-0.623782	3.62917	-4.25295	blue	turquoise	brown
DTL	denticleless E3 ubiquitin protein ligase homolog	-13.9018	9.99569	7.2769e-08	-4.84116	-3.50361	-1.65256	2.51983	-4.17238	blue	turquoise	brown
L3MBTL3	l(3)mbt-like 3 (Drosophila)	-13.8847	11.062	2.40513e-08	-2.91563	-2.11821	0.775656	3.29258	-2.51692	turquoise	turquoise	thistle2
SPAG5	sperm associated antigen 5	-13.8691	9.41786	1.39587e-07	-4.55718	-3.28643	-0.279448	3.64236	-3.92181	blue	turquoise	brown
ATG4A	autophagy related 4A cysteine peptidase	-13.8651	11.379	1.76851e-08	-2.06015	-1.49766	1.10185	2.88076	-1.77891	turquoise	turquoise	orangered4
RRP36	ribosomal RNA processing 36	-13.8564	15.8038	2.94794e-10	-1.64982	-1.2116	2.27225	3.70296	-1.43071	blue	turquoise	purple
EFNB1	ephrin B1	-13.8471	19.3431	1.7121e-11	-3.88793	-2.86798	-0.07068	3.30728	-3.37796	turquoise	turquoise	cyan
ESM1	endothelial cell specific molecule 1	-13.8328	8.81562	2.80167e-07	-6.04885	-4.34384	0.0744654	5.27081	-5.19634	turquoise	turquoise	steelblue
NF2	neurofibromin 2	-13.7907	14.3204	1.15337e-09	-2.24428	-1.64125	3.76561	5.70837	-1.94276	green	turquoise	royalblue
FANCD2	Fanconi anemia complementation group D2	-13.7755	9.80341	9.75727e-08	-3.85636	-2.78002	-0.732118	2.58608	-3.31819	blue	turquoise	brown
KIF2C	kinesin family member 2C	-13.7617	9.14038	2.03386e-07	-5.16441	-3.70917	-1.35998	3.0768	-4.43679	blue	turquoise	brown
PBK	PDZ binding kinase	-13.7564	9.29899	1.71218e-07	-5.87277	-4.221	-2.70637	2.34051	-5.04688	blue	turquoise	brown
HAGLR	HOXD antisense growth-associated long non-coding RNA	-13.7302	11.4463	1.83736e-08	-3.95369	-2.86571	-1.23216	2.17754	-3.4097	turquoise	turquoise	darkgreen
MRPL37	mitochondrial ribosomal protein L37	-13.7124	11.5397	1.69803e-08	-1.49475	-1.0833	2.71544	4.00447	-1.28903	blue	turquoise	lightgreen
MMP10	matrix metallopeptidase 10	-13.7003	14.5671	1.0121e-09	-7.18734	-5.24771	-3.32283	2.8947	-6.21753	turquoise	turquoise	mediumpurple2
MYBL2	MYB proto-oncogene like 2	-13.6784	8.29688	5.56345e-07	-6.40106	-4.56394	-1.26144	4.22107	-5.4825	blue	turquoise	brown
CDCA4	cell division cycle associated 4	-13.6622	18.6351	3.718e-11	-2.12129	-1.55703	1.00397	2.84313	-1.83916	blue	turquoise	brown
HS6ST2	heparan sulfate 6-O-sulfotransferase 2	-13.6455	15.0414	7.06965e-10	-4.18892	-3.05732	-4.37837	-0.755247	-3.62312	black	turquoise	thistle1
HELLS	helicase, lymphoid-specific	-13.6352	16.4161	2.24218e-10	-3.23695	-2.36741	0.187932	2.99011	-2.80218	blue	turquoise	brown
CDC25A	cell division cycle 25A	-13.6342	20.86	7.38534e-12	-3.14535	-2.31253	-0.190316	2.53862	-2.72894	blue	turquoise	purple
FOXM1	forkhead box M1	-13.6283	9.83785	1.04002e-07	-5.68376	-4.08333	-1.234	3.64954	-4.88354	turquoise	turquoise	brown
KIF22	kinesin family member 22	-13.6269	12.367	8.1438e-09	-2.58168	-1.87193	1.27069	3.4975	-2.22681	blue	turquoise	brown
RPUSD3	RNA pseudouridylate synthase domain containing 3	-13.5975	14.014	1.82832e-09	-1.55015	-1.12779	1.23811	2.57709	-1.33897	blue	turquoise	coral2
FAM136A	family with sequence similarity 136 member A	-13.579	12.7249	6.05152e-09	-2.08897	-1.51442	1.16182	2.96352	-1.8017	blue	turquoise	yellow4
EMC8	ER membrane protein complex subunit 8	-13.5718	10.8849	3.65234e-08	-1.65256	-1.19084	1.36337	2.78507	-1.4217	turquoise	turquoise	steelblue
ADAM9	ADAM metallopeptidase domain 9	-13.512	16.4381	2.5267e-10	-1.71908	-1.25369	4.62603	6.11242	-1.48639	green	turquoise	magenta
TCF19	transcription factor 19	-13.4897	14.7746	1.04352e-09	-3.60083	-2.61706	0.156186	3.26513	-3.10895	blue	turquoise	brown
SLC7A11	solute carrier family 7 member 11	-13.4809	9.09455	2.56111e-07	-7.72547	-5.50829	-1.89548	4.72141	-6.61688	turquoise	turquoise	purple
NDC80	NDC80, kinetochore complex component	-13.4729	9.54989	1.57272e-07	-5.17159	-3.6957	-2.04035	2.39329	-4.43364	blue	turquoise	brown
FADS2	fatty acid desaturase 2	-13.4481	11.3577	2.50953e-08	-3.64672	-2.6243	1.99123	5.12674	-3.13551	turquoise	turquoise	lightgreen
CAPN1	calpain 1	-13.437	12.1364	1.19273e-08	-1.51039	-1.08936	4.09093	5.39081	-1.29988	blue	turquoise	brown
CSTF3	cleavage stimulation factor subunit 3	-13.3644	20.5762	1.31393e-11	-1.24742	-0.911109	1.01271	2.09197	-1.07926	pink	turquoise	darkturquoise
POLR2E	RNA polymerase II subunit E	-13.347	10.0887	9.74036e-08	-1.55666	-1.11173	3.42642	4.76062	-1.3342	blue	turquoise	lightpink4
ASCC3	activating signal cointegrator 1 complex subunit 3	-13.276	12.0811	1.44187e-08	-1.52862	-1.09789	3.72822	5.04148	-1.31325	blue	turquoise	brown
C17orf51	chromosome 17 open reading frame 51	-13.2614	10.6165	6.05981e-08	-2.20015	-1.57141	-0.398513	1.48727	-1.88578	turquoise	turquoise	darkturquoise
NUP205	nucleoporin 205	-13.2359	12.6453	8.83582e-09	-1.59944	-1.14947	3.48073	4.85518	-1.37446	green	turquoise	magenta
MAD2L1	MAD2 mitotic arrest deficient-like 1 (yeast)	-13.2214	9.96622	1.20969e-07	-5.30873	-3.77687	-2.10497	2.43783	-4.5428	blue	turquoise	brown
C15orf54	chromosome 15 open reading frame 54	-13.173	11.6404	2.38822e-08	-7.60116	-5.4372	-4.65384	1.86534	-6.51918	turquoise	turquoise	salmon
TNIK	TRAF2 and NCK interacting kinase	-13.1392	8.0126	1.05585e-06	-4.529	-3.17693	-0.545977	3.30699	-3.85297	turquoise	turquoise	purple
GAL	galanin and GMAP prepropeptide	-13.1248	10.1067	1.12332e-07	-5.87808	-4.17402	-5.60476	-0.578705	-5.02605	turquoise	turquoise	brown
AEN	apoptosis enhancing nuclease	-13.1144	8.72885	4.83064e-07	-2.27095	-1.60005	1.85984	3.79534	-1.9355	blue	turquoise	violet
DSN1	DSN1 homolog, MIS12 kinetochore complex component	-13.1114	19.8742	3.0588e-11	-1.92867	-1.39903	0.432251	2.0961	-1.66385	blue	turquoise	purple
TIGAR	TP53 induced glycolysis regulatory phosphatase	-13.1068	8.68291	5.10364e-07	-2.51347	-1.77003	-0.0319523	2.1098	-2.14175	turquoise	turquoise	darkturquoise
RGS4	regulator of G-protein signaling 4	-13.0611	10.59	7.24957e-08	-5.70117	-4.05014	-0.513233	4.36242	-4.87565	turquoise	turquoise	antiquewhite4
TROAP	trophinin associated protein	-13.0606	8.5957	5.78051e-07	-6.0952	-4.28443	-2.57767	2.61214	-5.18981	blue	turquoise	brown
PIF1	PIF1 5'-to-3' DNA helicase	-13.0604	8.03208	1.08179e-06	-5.9493	-4.16475	-3.2611	1.79592	-5.05702	blue	turquoise	brown
EIF4EBP1	eukaryotic translation initiation factor 4E binding protein 1	-13.0514	8.42936	6.98068e-07	-3.51796	-2.46938	1.44176	4.43544	-2.99367	turquoise	turquoise	steelblue
MIPEP	mitochondrial intermediate peptidase	-13.0373	11.2275	3.96427e-08	-1.18011	-0.839928	0.318502	1.32852	-1.01002	turquoise	turquoise	darkorange2
DCBLD2	discoidin, CUB and LCCL domain containing 2	-13.0365	16.801	3.27132e-10	-2.44974	-1.76673	2.35717	4.46541	-2.10824	turquoise	turquoise	turquoise
KIF11	kinesin family member 11	-13.0362	9.76056	1.70681e-07	-5.16113	-3.6501	-0.678467	3.72715	-4.40561	blue	turquoise	brown
RRM1	ribonucleotide reductase catalytic subunit M1	-13.0051	14.4922	2.18038e-09	-2.55536	-1.83381	2.30247	4.49705	-2.19458	blue	turquoise	brown
PTTG1	pituitary tumor-transforming 1	-12.9844	8.18316	9.55549e-07	-5.65323	-3.95368	-0.981488	3.82196	-4.80345	blue	turquoise	purple
RAE1	ribonucleic acid export 1	-12.9771	10.3458	9.85148e-08	-1.66849	-1.18138	1.41099	2.83593	-1.42493	blue	turquoise	magenta
GABBR2	gamma-aminobutyric acid type B receptor subunit 2	-12.9604	16.2639	5.43427e-10	-7.46425	-5.36806	-4.04281	2.37335	-6.41616	turquoise	turquoise	brown
AC090833.1		-12.9355	11.8915	2.30633e-08	-5.4294	-3.86269	-6.19912	-1.55307	-4.64605	turquoise	turquoise	royalblue
RACGAP1	Rac GTPase activating protein 1	-12.9265	10.6308	7.72642e-08	-3.95178	-2.79766	-0.069251	3.30547	-3.37472	blue	turquoise	brown
FBXO22	F-box protein 22	-12.9254	18.2511	1.25757e-10	-1.54095	-1.11042	1.54635	2.87203	-1.32569	turquoise	turquoise	orangered4
SOX17	SRY-box 17	-12.9141	19.666	4.6376e-11	-6.17309	-4.45458	-2.94644	2.36739	-5.31384	turquoise	turquoise	saddlebrown
SKA1	spindle and kinetochore associated complex subunit 1	-12.9137	9.01027	4.06694e-07	-6.47149	-4.54245	-3.47612	2.03085	-5.50697	blue	turquoise	brown
ASF1B	anti-silencing function 1B histone chaperone	-12.8986	8.2021	9.85639e-07	-5.4148	-3.77829	-2.06654	2.53	-4.59654	blue	turquoise	brown
POLDIP2	DNA polymerase delta interacting protein 2	-12.895	17.2142	2.82421e-10	-1.06143	-0.763183	3.58609	4.4984	-0.912308	green	turquoise	purple
PARP1	poly(ADP-ribose) polymerase 1	-12.8812	21.485	1.41214e-11	-1.47276	-1.06381	3.7067	4.97499	-1.26829	blue	turquoise	brown
PKMYT1	protein kinase, membrane associated tyrosine/threonine 1	-12.874	9.67467	2.09235e-07	-6.33221	-4.45645	-3.54383	1.8505	-5.39433	blue	turquoise	brown
EHD4	EH domain containing 4	-12.8562	9.46291	2.63391e-07	-1.71098	-1.20218	4.24414	5.70073	-1.45658	blue	turquoise	blue
CCDC77	coiled-coil domain containing 77	-12.8341	21.2017	1.826e-11	-1.03103	-0.743637	0.164085	1.05142	-0.887336	blue	turquoise	palevioletred3
VDAC1	voltage dependent anion channel 1	-12.8281	13.163	8.10549e-09	-2.06535	-1.47061	3.35797	5.12595	-1.76798	blue	turquoise	magenta
RANBP1	RAN binding protein 1	-12.8021	16.1982	6.86691e-10	-2.29842	-1.64592	2.29228	4.26445	-1.97217	blue	turquoise	magenta
TARS	threonyl-tRNA synthetase	-12.8008	10.5871	8.8926e-08	-2.01791	-1.42338	3.4246	5.14525	-1.72065	blue	turquoise	royalblue
AP1B1	adaptor related protein complex 1 beta 1 subunit	-12.792	13.7488	5.07102e-09	-1.68084	-1.19743	3.75109	5.19023	-1.43913	blue	turquoise	blue
NDUFAF8	NADH:ubiquinone oxidoreductase complex assembly factor 8	-12.7619	8.78711	5.69792e-07	-2.49413	-1.74069	0.156595	2.27401	-2.11741	turquoise	turquoise	brown
ECI2	enoyl-CoA delta isomerase 2	-12.7602	19.6037	5.98437e-11	-1.51196	-1.08661	1.39668	2.69596	-1.29929	turquoise	turquoise	brown
SPC25	SPC25, NDC80 kinetochore complex component	-12.7305	11.5248	3.86245e-08	-5.42364	-3.83224	-4.64778	-0.0198361	-4.62794	turquoise	turquoise	brown
PAQR4	progestin and adipoQ receptor family member 4	-12.7026	7.7243	1.88728e-06	-3.77958	-2.61202	-1.23593	1.95987	-3.1958	turquoise	turquoise	blue
USP31	ubiquitin specific peptidase 31	-12.6605	21.5422	1.8928e-11	-1.49386	-1.07289	1.92348	3.20686	-1.28338	turquoise	green	darkgreen
CENPI	centromere protein I	-12.6383	9.3336	3.50445e-07	-4.49313	-3.13513	-1.67688	2.13725	-3.81413	blue	turquoise	brown
PSRC1	proline and serine rich coiled-coil 1	-12.6277	9.19683	4.06278e-07	-5.24245	-3.65392	-2.84749	1.6007	-4.44819	blue	turquoise	brown
PTPN11	protein tyrosine phosphatase, non-receptor type 11	-12.6158	18.2051	1.93883e-10	-0.786814	-0.562323	4.29388	4.96845	-0.674568	lightcyan	turquoise	turquoise
HIST1H2BK	histone cluster 1 H2B family member k	-12.6031	16.3583	7.66496e-10	-2.89188	-2.06037	1.13285	3.60898	-2.47612	green	turquoise	green
KPNA2	karyopherin subunit alpha 2	-12.5986	9.79092	2.27147e-07	-2.78537	-1.94615	3.11775	5.48351	-2.36576	blue	turquoise	brown
SHCBP1	SHC binding and spindle associated 1	-12.5886	8.60459	7.74621e-07	-6.04697	-4.19376	-2.0409	3.07947	-5.12037	blue	turquoise	brown
NONO	non-POU domain containing, octamer-binding	-12.5709	14.2864	4.06131e-09	-0.822363	-0.583032	5.46667	6.16937	-0.702697	green	turquoise	blue
GOT2	glutamic-oxaloacetic transaminase 2	-12.5597	11.7923	3.50345e-08	-1.82321	-1.28326	3.35826	4.91149	-1.55323	blue	turquoise	yellowgreen
HTR1B	5-hydroxytryptamine receptor 1B	-12.5544	8.66765	7.41076e-07	-4.13316	-2.8648	-0.166563	3.33242	-3.49898	lightcyan	turquoise	floralwhite
NECTIN1	nectin cell adhesion molecule 1	-12.539	16.4822	7.53356e-10	-1.82274	-1.29662	1.23382	2.7935	-1.55968	turquoise	turquoise	pink
CDK4	cyclin dependent kinase 4	-12.5381	12.1206	2.65941e-08	-1.71896	-1.21046	2.31156	3.77627	-1.46471	turquoise	turquoise	orangered4
WDHD1	WD repeat and HMG-box DNA binding protein 1	-12.5315	17.2854	4.19338e-10	-2.39289	-1.704	0.375036	2.42348	-2.04844	blue	turquoise	brown
CDT1	chromatin licensing and DNA replication factor 1	-12.5276	9.49988	3.20199e-07	-4.83435	-3.36547	-2.00908	2.09083	-4.09991	blue	turquoise	brown
ETV5	ETS variant 5	-12.5039	8.78926	6.74512e-07	-4.22599	-2.92713	-0.24382	3.33274	-3.57656	turquoise	turquoise	lightcyan
BCKDK	branched chain ketoacid dehydrogenase kinase	-12.4839	12.73	1.63809e-08	-1.5265	-1.07528	2.3048	3.60569	-1.30089	turquoise	turquoise	red
NRP1	neuropilin 1	-12.4499	15.0547	2.49986e-09	-3.35553	-2.37479	3.12461	5.98977	-2.86516	turquoise	turquoise	lightcyan
EIF2B2	eukaryotic translation initiation factor 2B subunit beta	-12.4112	14.5598	3.85888e-09	-2.61421	-1.84618	1.88701	4.11721	-2.2302	turquoise	turquoise	orange
EBP	emopamil binding protein (sterol isomerase)	-12.3968	13.8114	7.18013e-09	-2.00499	-1.41289	0.668901	2.37784	-1.70894	blue	turquoise	purple
MCM7	minichromosome maintenance complex component 7	-12.3814	11.3009	6.39115e-08	-2.83269	-1.97994	2.84262	5.24894	-2.40631	blue	turquoise	magenta
TNFSF15	tumor necrosis factor superfamily member 15	-12.3693	15.9965	1.3281e-09	-3.62745	-2.56598	0.715969	3.81268	-3.09671	turquoise	turquoise	turquoise
MRPL15	mitochondrial ribosomal protein L15	-12.3564	8.297	1.24746e-06	-2.8788	-1.97801	0.960747	3.38915	-2.42841	turquoise	turquoise	yellowgreen
CDCA5	cell division cycle associated 5	-12.3514	9.46206	3.77697e-07	-5.43629	-3.76376	-2.14798	2.45204	-4.60003	blue	turquoise	brown
SFXN1	sideroflexin 1	-12.3409	11.5592	5.23768e-08	-1.88291	-1.31578	2.40541	4.00475	-1.59935	blue	turquoise	darkgrey
NSDHL	NAD(P) dependent steroid dehydrogenase-like	-12.3239	21.9959	2.38575e-11	-1.80243	-1.28318	0.671302	2.21411	-1.54281	turquoise	turquoise	turquoise
C17orf53	chromosome 17 open reading frame 53	-12.2988	10.0552	2.1972e-07	-3.74283	-2.5954	-2.71606	0.453062	-3.16912	blue	turquoise	brown
FAM111B	family with sequence similarity 111 member B	-12.2853	13.4545	1.07905e-08	-5.40961	-3.7963	-2.50809	2.09486	-4.60295	blue	turquoise	brown
CDK1	cyclin dependent kinase 1	-12.258	11.4701	6.10153e-08	-3.75055	-2.61353	0.152739	3.33478	-3.18204	blue	turquoise	brown
HIST1H3H	histone cluster 1 H3 family member h	-12.2384	9.96283	2.51585e-07	-4.21163	-2.91372	1.24906	4.81173	-3.56268	green	turquoise	turquoise
THOP1	thimet oligopeptidase 1	-12.238	9.11986	5.77026e-07	-2.89436	-1.99279	1.43143	3.875	-2.44358	blue	turquoise	purple
RRP1B	ribosomal RNA processing 1B	-12.2341	12.6124	2.29818e-08	-1.37992	-0.964612	2.96208	4.13434	-1.17227	turquoise	turquoise	turquoise
FAM83D	family with sequence similarity 83 member D	-12.2283	7.90969	2.04587e-06	-6.04052	-4.12054	-2.05243	3.0281	-5.08053	blue	turquoise	brown
SMARCC1	SWI/SNF related, matrix associated, actin dependent regulator of chromatin subfamily c member 1	-12.2202	12.6223	2.30962e-08	-1.11087	-0.776237	4.14386	5.08741	-0.943554	blue	turquoise	brown
AKR1B1	aldo-keto reductase family 1 member B	-12.2167	11.8236	4.62314e-08	-3.04027	-2.11866	0.953624	3.53309	-2.57947	turquoise	turquoise	green
PGF	placental growth factor	-12.2029	19.849	1.11448e-10	-7.18452	-5.08597	-0.590966	5.54428	-6.13525	turquoise	green	lightcyan
SSNA1	SS nuclear autoantigen 1	-12.1992	12.9761	1.74946e-08	-1.51729	-1.06067	1.85523	3.14421	-1.28898	turquoise	turquoise	turquoise
SNRNP25	small nuclear ribonucleoprotein U11/U12 subunit 25	-12.195	16.1376	1.47074e-09	-2.33641	-1.64482	0.291918	2.28253	-1.99061	blue	turquoise	brown
PLK4	polo like kinase 4	-12.195	11.0328	9.56478e-08	-4.40118	-3.05581	-1.25407	2.47442	-3.72849	blue	turquoise	brown
CPNE2	copine 2	-12.1723	15.2928	2.84337e-09	-1.42854	-1.0034	2.79267	4.00864	-1.21597	turquoise	turquoise	blue
GTF3C2	general transcription factor IIIC subunit 2	-12.1702	12.8097	2.0689e-08	-0.957877	-0.668702	2.4795	3.29279	-0.813289	turquoise	turquoise	turquoise
LPIN1	lipin 1	-12.1219	12.7581	2.26479e-08	-2.52081	-1.75695	1.50191	3.6408	-2.13888	turquoise	turquoise	orangered4
YKT6	YKT6 v-SNARE homolog (S. cerevisiae)	-12.0706	15.0272	3.90768e-09	-1.46047	-1.02216	3.17267	4.41398	-1.24132	turquoise	turquoise	steelblue
POLD1	DNA polymerase delta 1, catalytic subunit	-12.066	9.13216	6.44124e-07	-2.45773	-1.68311	1.26165	3.33207	-2.07042	blue	turquoise	royalblue
EIF5A	eukaryotic translation initiation factor 5A	-12.0437	21.7575	4.28893e-11	-1.96903	-1.39021	3.40918	5.08881	-1.67962	turquoise	turquoise	purple
DLST	dihydrolipoamide S-succinyltransferase	-12.0198	21.9884	3.87842e-11	-0.930253	-0.656474	3.51625	4.30961	-0.793363	blue	turquoise	violet
CDCA3	cell division cycle associated 3	-12.0186	11.2312	9.30876e-08	-3.93628	-2.72031	-1.08215	2.24614	-3.32829	blue	turquoise	purple
SUPT16H	SPT16 homolog, facilitates chromatin remodeling subunit	-11.9689	21.7644	4.80855e-11	-1.05301	-0.74182	4.04413	4.94154	-0.897414	green	turquoise	purple
WRAP53	WD repeat containing antisense to TP53	-11.9662	10.726	1.53316e-07	-1.96445	-1.35245	0.271756	1.9302	-1.65845	turquoise	turquoise	magenta
[truncated: 11,804 more rows]

## Sheet: EvL
	statistic.t	parameter.df	p.value	conf.int1	conf.int2	estimate.mean.of.x	estimate.mean.of.y	modules.all	modules.CEL	modules.flow
[truncated: 12,068 more rows]

[truncated: 6 more sheets: 005v000, 080v000, 240v000, 480v000, flovno, earlyflovno]
