# Supplementary material for: Transcriptional drifts associated with environmental changes in endothelial cells
Source: eLife. 2023 Mar 27;12:e81370. doi: 10.7554/eLife.81370 (PMC10168696; doi:10.7554/eLife.81370)
Supplement: Supplementary file 4. [file elife-81370-supp4.xlsx]

## Sheet: all
symbol	genename	genetype	module	bicor.batch	bicor.cordVearly	bicor.cordVlate	bicor.lateVearly	bicor.cordVculture	bicor.flow30minVstatic	bicor.flow8hrVstatic	bicor.flow24hrVstatic	bicor.flow48hrVstatic	bicor.flowVstatic	bicor.timeUnderFlow	p.batch	p.cordVearly	p.cordVlate	p.lateVearly	p.cordVculture	p.flow30minVstatic	p.flow8hrVstatic	p.flow24hrVstatic	p.flow48hrVstatic	p.flowVstatic	p.timeUnderFlow	fdr.batch	fdr.cordVearly	fdr.cordVlate	fdr.lateVearly	fdr.cordVculture	fdr.flow30minVstatic	fdr.flow8hrVstatic	fdr.flow24hrVstatic	fdr.flow48hrVstatic	fdr.flowVstatic	fdr.timeUnderFlow	nObs.batch	nObs.cordVearly	nObs.cordVlate	nObs.lateVearly	nObs.cordVculture	nObs.flow30minVstatic	nObs.flow8hrVstatic	nObs.flow24hrVstatic	nObs.flow48hrVstatic	nObs.flowVstatic	nObs.timeUnderFlow	ya65c	ya66c
GPX4	glutathione peroxidase 4	coding	yellow	-0.0212223	-0.889629	-0.946045	0.440247	-0.853083	-0.257992	-0.743411	-0.984106	-0.963176	-0.91724	-0.613097	0.896582	2.04937e-05	3.16911e-07	0.115164	8.92487e-07	0.537301	0.055473	9.91798e-06	0.000121408	1.48614e-06	0.00524989	0.999991	8.58089e-05	3.53069e-06	0.266421	5.70263e-06	0.999965	0.186557	0.00330387	0.00637013	0.00495174	0.0267142	40	14	14	14	21	8	7	8	8	15	19	0.947589	0.511515
TBC1D2	TBC1 domain family member 2	coding	blue	0.00346392	0.220726	0.698295	-0.477252	0.426083	0.260005	0.893624	0.971427	0.984527	0.914331	0.564138	0.983076	0.448266	0.00547485	0.0844035	0.0541102	0.534016	0.00668895	5.70764e-05	9.15451e-06	1.847e-06	0.011871	0.999991	0.509604	0.0101584	0.219064	0.0750193	0.999965	0.0982526	0.00464352	0.0027323	0.00495174	0.0467045	40	14	14	14	21	8	7	8	8	15	19	0.16917	-0.29755
ORAI2	ORAI calcium release-activated calcium modulator 2	coding	yellow	-0.0146163	-0.707155	-0.819908	0.691604	-0.799316	-0.727411	-0.870259	-0.991849	-0.931691	-0.910176	-0.753737	0.928673	0.00467749	0.000330131	0.00614429	1.3819e-05	0.0408487	0.0108461	1.34576e-06	0.000756587	2.48709e-06	0.000193941	0.999991	0.00861069	0.000892751	0.0487725	4.6118e-05	0.999965	0.0982526	0.00232409	0.0139258	0.00495174	0.00262568	40	14	14	14	21	8	7	8	8	15	19	0.801973	0.141157
VPS50	VPS50 subunit of EARP/GARPII complex	coding	blue	0.0109457	0.020151	0.0965968	-0.108318	0.0597083	-0.0400301	0.861022	0.946673	0.966291	0.908749	0.597505	0.946555	0.945488	0.742531	0.712434	0.797108	0.925024	0.0128144	0.000364117	9.33543e-05	2.74572e-06	0.00690188	0.999991	0.955232	0.783029	0.825807	0.829719	0.999965	0.0982526	0.010678	0.00591777	0.00495174	0.032446	40	14	14	14	21	8	7	8	8	15	19	-0.147536	0.212589
NIPAL3	NIPA like domain containing 3	coding	blue	0.0179546	0.924264	0.932035	0.133191	0.882783	-0.173441	0.899362	0.97705	0.960148	0.908532	0.669224	0.912439	2.3107e-06	1.22766e-06	0.649883	1.17846e-07	0.681261	0.00584159	2.97028e-05	0.000153534	2.78706e-06	0.00172684	0.999991	1.53783e-05	9.71333e-06	0.782049	1.79575e-06	0.999965	0.0982526	0.0039175	0.00711689	0.00495174	0.012492	40	14	14	14	21	8	7	8	8	15	19	0.813043	0.471807
STX6	syntaxin 6	coding	salmon	0.00220546	-0.458523	-0.695497	0.526394	-0.527496	-0.0267758	-0.935052	-0.911366	-0.939675	-0.903737	-0.567694	0.989224	0.0991471	0.00574752	0.0531467	0.0139927	0.949819	0.00199335	0.00162712	0.000524292	3.83887e-06	0.0112336	0.999991	0.133987	0.0105913	0.164881	0.0219015	0.999965	0.0982526	0.0217264	0.0118811	0.00495174	0.044938	40	14	14	14	21	8	7	8	8	15	19	0.394588	0.491978
LOXL2	lysyl oxidase like 2	coding	yellow	-0.0390094	-0.936552	-0.955481	0.517576	-0.894431	-0.493875	-0.868976	-0.931726	-0.949902	-0.902031	-0.649839	0.811117	8.20721e-07	1.02083e-07	0.0580129	4.56991e-08	0.213544	0.0111083	0.000755437	0.000302657	4.28507e-06	0.00259849	0.999991	6.778e-06	1.51152e-06	0.173791	1.35886e-06	0.999965	0.0982526	0.0150433	0.00940487	0.00495174	0.0166438	40	14	14	14	21	8	7	8	8	15	19	0.867785	0.395542
RASD1	ras related dexamethasone induced 1	coding	tan	-0.00551838	0.70161	0.732976	-0.0742974	0.687192	-0.382365	-0.91497	-0.920421	-0.949371	-0.901414	-0.62691	0.973041	0.00516499	0.00286041	0.800713	0.000578304	0.349879	0.00386638	0.00118589	0.00031224	4.45695e-06	0.00407123	0.999991	0.00940136	0.00566749	0.881509	0.00121637	0.999965	0.0982526	0.0185819	0.00956349	0.00495174	0.0224127	40	14	14	14	21	8	7	8	8	15	19	0.494471	-0.0559929
ZNF589	zinc finger protein 589	coding	red	-0.0205524	-0.844822	-0.860532	0.0565109	-0.884432	-0.0363616	0.855589	0.942303	0.946728	0.899377	0.532805	0.89983	0.000143052	7.81391e-05	0.847834	1.03694e-07	0.931882	0.0140605	0.000459645	0.000363015	5.06468e-06	0.0188362	0.999991	0.000427431	0.000267697	0.910458	1.70914e-06	0.999965	0.0982526	0.0118965	0.0100509	0.00495174	0.0642352	40	14	14	14	21	8	7	8	8	15	19	-0.206906	-0.386305
ID3	inhibitor of DNA binding 3, HLH protein	coding	tan	-0.0164588	0.926276	0.910922	0.524096	0.867386	0.959631	-0.805451	-0.960036	-0.948229	-0.899195	-0.594438	0.919709	1.9748e-06	5.93938e-06	0.0543854	3.57594e-07	0.000159525	0.028787	0.000154821	0.000333561	5.12237e-06	0.00727201	0.999991	1.34762e-05	3.35733e-05	0.167067	3.25122e-06	0.183381	0.123143	0.00706753	0.00978627	0.00495174	0.0336126	40	14	14	14	21	8	7	8	8	15	19	2.01551	1.66738
SLC19A1	solute carrier family 19 member 1	coding	yellow	-0.11193	-0.914683	-0.909512	-0.322082	-0.536323	-0.749156	-0.87046	-0.982712	-0.970927	-0.893644	-0.570965	0.49169	4.62326e-06	6.50578e-06	0.261429	0.0121985	0.0324082	0.0108054	1.27494e-05	6.00993e-05	7.15811e-06	0.010672	0.999991	2.65136e-05	3.62587e-05	0.442124	0.0193951	0.999965	0.0982526	0.00330387	0.00524107	0.00495174	0.0433198	40	14	14	14	21	8	7	8	8	15	19	0.0260797	-0.474012
NQO1	NAD(P)H quinone dehydrogenase 1	coding	red	-0.0894129	-0.974235	-0.976412	0.459035	-0.464256	0.249179	0.875894	0.937836	0.940617	0.891232	0.644203	0.583235	3.99515e-09	2.36394e-09	0.098722	0.0339944	0.551768	0.00973711	0.000572901	0.000500464	8.23159e-06	0.00291129	0.999991	1.61919e-07	1.128e-07	0.241926	0.0491381	0.999965	0.0982526	0.0130528	0.0116975	0.00495174	0.0179489	40	14	14	14	21	8	7	8	8	15	19	-1.13422	-0.346702
SLC16A2	solute carrier family 16 member 2	coding	blue	0.021979	0.957903	0.970242	-0.782395	0.889479	0.269545	0.901473	0.948828	0.919394	0.889982	0.662557	0.892916	7.33614e-08	9.40334e-09	0.000941667	6.9242e-08	0.518549	0.00554659	0.000322274	0.00123142	8.83906e-06	0.00199382	0.999991	1.18152e-06	2.83108e-07	0.0200462	1.51482e-06	0.999965	0.0982526	0.00986721	0.0173258	0.00495174	0.0137845	40	14	14	14	21	8	7	8	8	15	19	0.565355	0.862028
GAB2	GRB2 associated binding protein 2	coding	tan	0.0107545	0.897205	0.882639	0.185093	0.863842	-0.280733	-0.894529	-0.969108	-0.980288	-0.888587	-0.549564	0.947487	1.36043e-05	2.91621e-05	0.52641	4.52808e-07	0.500627	0.00655082	7.20067e-05	1.8866e-05	9.56019e-06	0.0147933	0.999991	6.1482e-05	0.000120037	0.686021	3.77027e-06	0.999965	0.0982526	0.00490513	0.00360493	0.00495174	0.0544416	40	14	14	14	21	8	7	8	8	15	19	1.56899	1.28137
FGF18	fibroblast growth factor 18	coding	blue	0.0166596	0.958551	0.984259	-0.290125	0.879912	0.325922	0.839829	0.940184	0.950026	0.888138	0.56423	0.918732	6.69363e-08	2.12313e-10	0.31432	1.46588e-07	0.430794	0.0180549	0.000511342	0.000300427	9.80233e-06	0.0118541	0.999991	1.10787e-06	2.14776e-08	0.496247	1.98504e-06	0.999965	0.101553	0.0124825	0.00937999	0.00495174	0.0466674	40	14	14	14	21	8	7	8	8	15	19	0.851422	0.728392
PI16	peptidase inhibitor 16	coding	blue	0.0135971	0.938431	0.906508	0.319706	0.851185	-0.533997	0.863744	0.976485	0.966737	0.886764	0.57496	0.933635	6.88109e-07	7.86145e-06	0.265164	1.00039e-06	0.172811	0.0122148	3.19344e-05	8.9731e-05	1.05754e-05	0.0100171	0.999991	5.91914e-06	4.22474e-05	0.445778	6.1348e-06	0.999965	0.0982526	0.0039175	0.00590963	0.00495174	0.041694	40	14	14	14	21	8	7	8	8	15	19	0.578032	0.18608
INPP5K	inositol polyphosphate-5-phosphatase K	coding	blue	0.0166431	0.931217	0.938075	-0.0921105	0.891893	-0.291841	0.878508	0.929915	0.951534	0.886661	0.610329	0.918813	1.31666e-06	7.11796e-07	0.754144	5.66894e-08	0.483075	0.00924603	0.000816017	0.000274371	1.06353e-05	0.00551673	0.999991	9.8574e-06	6.49384e-06	0.8514	1.43737e-06	0.999965	0.0982526	0.0157295	0.00894931	0.00495174	0.0276164	40	14	14	14	21	8	7	8	8	15	19	0.869802	0.839776
MOB2	MOB kinase activator 2	coding	blue	0.0192024	0.948148	0.953251	0.297863	0.468841	-0.673821	0.896689	0.963415	0.974597	0.886403	0.718433	0.90638	2.50797e-07	1.36204e-07	0.300989	0.0320408	0.0669181	0.00622806	0.000119081	4.02034e-05	1.07867e-05	0.000530355	0.999991	2.87258e-06	1.8823e-06	0.483248	0.0465697	0.999965	0.0982526	0.0061966	0.0046586	0.00495174	0.00541422	40	14	14	14	21	8	7	8	8	15	19	0.936765	0.937404
AFMID	arylformamidase	coding	yellow	-0.0289573	-0.195924	-0.273088	0.0231415	-0.218529	0.187554	-0.854504	-0.872131	-0.873065	-0.884978	-0.609684	0.859216	0.502038	0.34483	0.937411	0.341262	0.656497	0.0143174	0.00473839	0.00463864	1.16557e-05	0.00558042	0.999991	0.562022	0.406148	0.964253	0.395859	0.999965	0.0982526	0.0374437	0.0329341	0.00495174	0.0278237	40	14	14	14	21	8	7	8	8	15	19	0.286621	0.0604135
PLAC9	placenta associated 9	coding	blue	0.00276112	0.915484	0.787693	0.059	0.795741	0.165281	0.919353	0.97336	0.967019	0.883689	0.63101	0.986509	4.37656e-06	0.00082233	0.841208	1.6099e-05	0.695695	0.00339547	4.63271e-05	8.74818e-05	1.24908e-05	0.00376669	0.999991	2.53861e-05	0.00195055	0.907244	5.23475e-05	0.999965	0.0982526	0.0045062	0.00584952	0.00495174	0.0212538	40	14	14	14	21	8	7	8	8	15	19	-0.0930843	0.28593
ZNF775	zinc finger protein 775	coding	yellow	-0.0229145	-0.653452	-0.848933	0.727554	-0.74195	-0.441931	-0.923302	-0.925942	-0.91331	-0.883413	-0.482866	0.888386	0.0112663	0.000122916	0.00318551	0.000118003	0.272946	0.00300143	0.000959863	0.00152468	1.26762e-05	0.0362501	0.999991	0.0189545	0.000390417	0.0342523	0.000293729	0.999965	0.0982526	0.0168576	0.019357	0.00495174	0.100743	40	14	14	14	21	8	7	8	8	15	19	-1.05442	-1.42683
TCF4	transcription factor 4	coding	grey60	-0.0396216	0.660723	0.124274	0.583157	0.342891	0.11287	-0.879925	-0.961437	-0.973696	-0.882244	-0.501955	0.808208	0.0100999	0.672086	0.0286033	0.128091	0.79016	0.00898591	0.000139251	4.46076e-05	1.34861e-05	0.0285324	0.999991	0.0171681	0.721927	0.114676	0.163574	0.999965	0.0982526	0.00669516	0.0046586	0.00495174	0.0855365	40	14	14	14	21	8	7	8	8	15	19	1.7771	1.88278
TNXB	tenascin XB	coding	blue	0.0108842	0.977078	0.986823	-0.715981	0.890774	0.223084	0.876294	0.966417	0.977752	0.882212	0.767158	0.946855	1.9933e-09	7.34552e-11	0.00397665	6.22302e-08	0.595387	0.009661	9.23187e-05	2.70722e-05	1.35092e-05	0.000126612	0.999991	1.08413e-07	1.22196e-08	0.0387131	1.47306e-06	0.999965	0.0982526	0.00525842	0.00417472	0.00495174	0.00198636	40	14	14	14	21	8	7	8	8	15	19	1.20972	1.8098
NOV			blue	0.0141232	0.976006	0.976156	-0.714271	0.859934	0.11468	0.866691	0.948202	0.896538	0.881828	0.594432	0.931073	2.6165e-09	2.52025e-09	0.00410557	5.83098e-07	0.786853	0.011584	0.000334076	0.00255836	1.37843e-05	0.00727275	0.999991	1.28239e-07	1.18032e-07	0.0388004	4.3967e-06	0.999965	0.0982526	0.0101062	0.0241421	0.00495174	0.0336126	40	14	14	14	21	8	7	8	8	15	19	0.0545199	-0.458505
CTTNBP2NL	CTTNBP2 N-terminal like	coding	blue	0.0194563	0.807652	0.865098	-0.615898	0.843655	-0.201686	0.893621	0.927206	0.920199	0.880815	0.588534	0.905147	0.000476364	6.46581e-05	0.0190213	1.55021e-06	0.631969	0.00668928	0.000912462	0.00119564	1.45338e-05	0.00802987	0.999991	0.00118133	0.000229929	0.0913125	8.35189e-06	0.999965	0.0982526	0.016447	0.0169825	0.00495174	0.0359994	40	14	14	14	21	8	7	8	8	15	19	1.39664	1.56724
GRAMD1C	GRAM domain containing 1C	coding	yellow	0.0101588	-0.622693	-0.839952	0.72421	-0.678949	0.202892	-0.885274	-0.963891	-0.939333	-0.880427	-0.757053	0.950392	0.0173832	0.000170289	0.00340008	0.00071389	0.629889	0.00804239	0.000114543	0.00053312	1.48303e-05	0.00017498	0.999991	0.0279756	0.000511595	0.0355617	0.00147142	0.999965	0.0982526	0.00601983	0.0119952	0.00495174	0.00246377	40	14	14	14	21	8	7	8	8	15	19	-1.05442	-0.823067
ARHGEF9	Cdc42 guanine nucleotide exchange factor 9	coding	tan	0.0114813	0.976405	0.963686	0.406121	0.88787	-0.305823	-0.857403	-0.922146	-0.925926	-0.880126	-0.781227	0.943944	2.36782e-09	3.0614e-08	0.14962	7.8922e-08	0.461333	0.0136371	0.00111193	0.000960484	1.50632e-05	7.8521e-05	0.999991	1.19386e-07	6.34614e-07	0.31412	1.59089e-06	0.999965	0.0982526	0.0180349	0.0151088	0.00495174	0.00145494	40	14	14	14	21	8	7	8	8	15	19	0.17499	0.312999
IFT122	intraflagellar transport 122	coding	tan	0.0339678	0.978284	0.984368	0.402685	0.858094	0.102501	-0.87711	-0.938746	-0.966289	-0.879913	-0.565603	0.835167	1.44488e-09	2.03662e-10	0.153429	6.55143e-07	0.809153	0.0095069	0.000548501	9.33712e-05	1.52299e-05	0.0116049	0.999991	8.57769e-08	2.11413e-08	0.318521	4.72847e-06	0.999965	0.0982526	0.0128999	0.00591777	0.00495174	0.0459291	40	14	14	14	21	8	7	8	8	15	19	0.786154	0.759244
FAM171B	family with sequence similarity 171 member B	coding	blue	0.0196399	0.381508	0.454895	-0.112924	0.418928	0.103991	0.906822	0.984042	0.936905	0.879879	0.57005	0.904256	0.178314	0.102196	0.70071	0.0587275	0.806419	0.00483845	1.00375e-05	0.000598596	1.52568e-05	0.0108267	0.999991	0.225907	0.139059	0.817041	0.0807798	0.999965	0.0982526	0.00330387	0.0124494	0.00495174	0.043771	40	14	14	14	21	8	7	8	8	15	19	0.415012	0.545807
SLC2A3	solute carrier family 2 member 3	coding	blue	0.0289788	0.950797	0.939287	0.432537	0.860539	0.692298	0.864269	0.986172	0.99172	0.879773	0.532707	0.859113	1.84174e-07	6.33862e-07	0.122423	5.61007e-07	0.0570596	0.0121009	6.5417e-06	1.41026e-06	1.534e-05	0.0188621	0.999991	2.29446e-06	5.90558e-06	0.276041	4.27134e-06	0.999965	0.0982526	0.00330387	0.00257874	0.00495174	0.0642985	40	14	14	14	21	8	7	8	8	15	19	1.22983	2.13245
ARHGAP1	Rho GTPase activating protein 1	coding	tan	0.0387294	0.485678	0.746174	-0.335489	0.590338	-0.430576	-0.806932	-0.967648	-0.9725	-0.879491	-0.40941	0.812449	0.0783015	0.00217774	0.240944	0.00484259	0.286903	0.0282661	8.2616e-05	5.09236e-05	1.55642e-05	0.0817425	0.999991	0.108412	0.0044762	0.421461	0.00834714	0.999965	0.121905	0.00507663	0.0048976	0.00495174	0.180444	40	14	14	14	21	8	7	8	8	15	19	1.22398	0.732894
SNCG	synuclein gamma	coding	blue	0.010417	0.549874	0.597926	0.0461922	0.541392	0.432209	0.906863	0.955409	0.950781	0.879251	0.59307	0.949133	0.0416373	0.023917	0.8754	0.0112557	0.284876	0.00483328	0.000214308	0.000287191	1.57573e-05	0.0074422	0.999991	0.0616803	0.0378227	0.925228	0.0180003	0.999965	0.0982526	0.00833824	0.00919686	0.00495174	0.0341337	40	14	14	14	21	8	7	8	8	15	19	0.214344	0.222884
SP4	Sp4 transcription factor	coding	yellow	-0.0406671	-0.00552301	-0.0556357	0.00843403	0.0690019	0.0706629	-0.878946	-0.941379	-0.891869	-0.879082	-0.715216	0.803246	0.98505	0.850167	0.977172	0.766315	0.867947	0.00916517	0.000481738	0.00291	1.58949e-05	0.000577036	0.999991	0.986923	0.876864	0.986849	0.80209	0.999965	0.0982526	0.0120945	0.0260049	0.00495174	0.00572211	40	14	14	14	21	8	7	8	8	15	19	-0.502643	0.0670117
AP1B1	adaptor related protein complex 1 subunit beta 1	coding	yellow	-0.0168658	-0.969524	-0.950091	0.136827	-0.890509	0.164633	-0.865493	-0.938218	-0.985611	-0.877967	-0.788174	0.91773	1.08317e-08	2.00301e-07	0.640907	6.36131e-08	0.696846	0.0118381	0.000562589	7.36763e-06	1.68252e-05	6.12299e-05	0.999991	3.03065e-07	2.49083e-06	0.775157	1.48751e-06	0.999965	0.0982526	0.013022	0.00266847	0.00495174	0.00122122	40	14	14	14	21	8	7	8	8	15	19	0.88964	0.666674
RBPMS	RNA binding protein, mRNA processing factor	coding	blue	0.0370711	0.947226	0.950299	-0.387093	0.863913	-0.427838	0.892657	0.928072	0.97846	0.877943	0.773748	0.820345	2.78206e-07	1.95432e-07	0.171513	4.50708e-07	0.29032	0.00683832	0.000880851	2.45844e-05	1.68452e-05	0.000101646	0.999991	3.07779e-06	2.44284e-06	0.342728	3.76185e-06	0.999965	0.0982526	0.016213	0.00402794	0.00495174	0.00169343	40	14	14	14	21	8	7	8	8	15	19	0.977325	0.598129
YDJC	YdjC chitooligosaccharide deacetylase homolog	coding	yellow	-0.0367462	-0.964519	-0.963127	-0.188579	-0.884496	-0.0716262	-0.832688	-0.950702	-0.933911	-0.877799	-0.668981	0.821894	2.66839e-08	3.35083e-08	0.51851	1.03178e-07	0.866159	0.0200535	0.000288549	0.00068634	1.69685e-05	0.00173602	0.999991	5.73625e-07	6.76856e-07	0.679225	1.70914e-06	0.999965	0.104396	0.00952663	0.0132478	0.00495174	0.0125327	40	14	14	14	21	8	7	8	8	15	19	-0.455653	-0.851264
FZD8	frizzled class receptor 8	coding	tan	0.0116374	0.914766	0.885701	0.547997	0.857194	-0.522069	-0.894026	-0.950078	-0.92428	-0.87778	-0.590739	0.943183	4.59729e-06	2.50572e-05	0.0424834	6.93126e-07	0.184443	0.00662734	0.00029951	0.00102465	1.69851e-05	0.00773967	0.999991	2.64001e-05	0.000106611	0.144993	4.84767e-06	0.999965	0.0982526	0.0096615	0.0156974	0.00495174	0.0351159	40	14	14	14	21	8	7	8	8	15	19	1.49393	1.31998
CASKIN2	CASK interacting protein 2	coding	blue	0.012629	0.893355	0.921038	-0.4215	0.827614	-0.14564	0.562294	0.982129	0.949027	0.876572	0.47353	0.938351	1.68173e-05	2.9468e-06	0.133343	3.66963e-06	0.730761	0.188872	1.40778e-05	0.000318572	1.80517e-05	0.0405687	0.999991	7.31022e-05	1.93974e-05	0.292222	1.58575e-05	0.999965	0.409093	0.00333402	0.00964359	0.00495174	0.108696	40	14	14	14	21	8	7	8	8	15	19	1.05923	1.04657
NTHL1	nth like DNA glycosylase 1	coding	grey	-0.000534445	0.25639	-0.518198	0.883887	-0.138616	-0.393844	0.858751	0.970169	0.974617	0.876407	0.64223	0.997389	0.37626	0.0576593	2.74271e-05	0.549022	0.334353	0.0133273	6.48905e-05	4.01122e-05	1.82019e-05	0.00302785	0.999991	0.436777	0.0835934	0.0097353	0.601958	0.999965	0.0982526	0.00474301	0.0046586	0.00495174	0.0184428	40	14	14	14	21	8	7	8	8	15	19	-0.411798	-0.105971
AQP1	aquaporin 1 (Colton blood group)	coding	blue	0.0214963	0.95845	0.980709	-0.324962	0.89519	0.210929	0.879022	0.921701	0.906507	0.876348	0.479173	0.895254	6.79066e-08	7.13813e-10	0.256944	4.28023e-08	0.616083	0.00915112	0.0011307	0.00190243	1.82556e-05	0.0379138	0.999991	1.12246e-06	4.82682e-08	0.43839	1.35046e-06	0.999965	0.0982526	0.0182363	0.0214298	0.00495174	0.103861	40	14	14	14	21	8	7	8	8	15	19	3.21725	3.03812
ORAI1	ORAI calcium release-activated calcium modulator 1	coding	steelblue	0.0124364	-0.128676	0.0415885	-0.412831	0.085429	0.247794	0.869278	0.980757	0.968093	0.875954	0.507554	0.939289	0.661093	0.887742	0.142365	0.712734	0.554055	0.0110463	1.7559e-05	7.92757e-05	1.86183e-05	0.0265323	0.999991	0.711573	0.908286	0.303923	0.753991	0.999965	0.0982526	0.00359921	0.00570677	0.00495174	0.0810614	40	14	14	14	21	8	7	8	8	15	19	0.390427	0.0800012
DUSP3	dual specificity phosphatase 3	coding	blue	0.0121447	0.580423	0.626683	0.0114465	0.58433	-0.380588	0.827322	0.957841	0.976252	0.875881	0.707086	0.940711	0.0295408	0.0164727	0.969021	0.00540845	0.352311	0.0216343	0.000181457	3.28876e-05	1.86868e-05	0.000710698	0.999991	0.0451849	0.0271292	0.982839	0.00923313	0.999965	0.107575	0.00769976	0.00457366	0.00495174	0.00664211	40	14	14	14	21	8	7	8	8	15	19	1.08003	0.967319
ARL4A	ADP ribosylation factor like GTPase 4A	coding	blue	0.0257944	0.907467	0.890601	0.254998	0.885419	-0.503337	0.895409	0.94602	0.928778	0.875434	0.657716	0.874464	7.40537e-06	1.9477e-05	0.378948	9.59673e-08	0.203527	0.00641821	0.00037747	0.00085563	1.91066e-05	0.00220842	0.999991	3.7942e-05	8.68122e-05	0.557705	1.66234e-06	0.999965	0.0982526	0.0107606	0.0146878	0.00495174	0.0147754	40	14	14	14	21	8	7	8	8	15	19	0.31532	1.15547
SRGN	serglycin	coding	darkgreen	-0.0162906	-0.544128	0.209567	-0.670707	-0.151769	0.0701342	0.860812	0.9511	0.989685	0.874324	0.794698	0.920527	0.0442664	0.472099	0.00865268	0.511356	0.868929	0.0128613	0.000281713	2.72256e-06	2.01848e-05	4.80703e-05	0.999991	0.0651401	0.533771	0.0588876	0.565515	0.999965	0.0982526	0.00946556	0.00257874	0.00495174	0.00103064	40	14	14	14	21	8	7	8	8	15	19	1.70655	2.07101
RBM12	RNA binding motif protein 12	coding	yellow	-0.0272192	-0.906168	-0.834051	-0.615871	-0.886005	0.2343	-0.87862	-0.952272	-0.951104	-0.873789	-0.770525	0.867589	8.02833e-06	0.000208775	0.019028	9.16193e-08	0.576501	0.00922524	0.00026217	0.000281648	2.07219e-05	0.000113271	0.999991	4.03217e-05	0.000606889	0.0913125	1.63509e-06	0.999965	0.0982526	0.0091849	0.0090853	0.00495174	0.00183629	40	14	14	14	21	8	7	8	8	15	19	1.06673	0.96578
SELPLG	selectin P ligand	coding	blue	0.0238753	0.773938	0.878356	-0.575244	0.826239	0.7695	0.879668	0.958911	0.927853	0.87345	0.59322	0.883737	0.00116047	3.58143e-05	0.0313796	3.93481e-06	0.0255674	0.00903278	0.000168122	0.000888762	2.10687e-05	0.00742341	0.999991	0.00253396	0.0001417	0.120937	1.6719e-05	0.999965	0.0982526	0.00743321	0.0147994	0.00495174	0.0340722	40	14	14	14	21	8	7	8	8	15	19	-0.307409	-1.18763
NOL4L	nucleolar protein 4 like	coding	yellow	-0.0234926	-0.403705	-0.478837	0.139023	-0.427037	0.600428	-0.873435	-0.878768	-0.928122	-0.873237	-0.647719	0.885589	0.152292	0.0832308	0.635505	0.0535166	0.115511	0.0102126	0.00405926	0.000879068	2.12891e-05	0.0027127	0.999991	0.196363	0.115654	0.771132	0.074234	0.999965	0.0982526	0.0341308	0.0147994	0.00495174	0.0171168	40	14	14	14	21	8	7	8	8	15	19	1.43696	1.34305
ID1	inhibitor of DNA binding 1, HLH protein	coding	green	0.0183093	0.828348	0.926719	-0.405314	0.845489	0.935207	0.867972	0.889232	0.906359	0.872181	0.167089	0.910716	0.000252373	1.90647e-06	0.15051	1.39631e-06	0.000647421	0.0113159	0.00312166	0.00191132	2.24095e-05	0.494159	0.999991	0.000687919	1.38243e-05	0.315318	7.73445e-06	0.314871	0.0982526	0.0301554	0.0214298	0.00495174	0.642071	40	14	14	14	21	8	7	8	8	15	19	1.57453	1.89461
SCAF1	SR-related CTD associated factor 1	coding	yellow	-0.0319112	-0.914323	-0.882786	-0.429558	-0.82436	-0.513639	-0.838612	-0.956816	-0.947984	-0.871936	-0.617706	0.845022	4.73784e-06	2.89537e-05	0.125309	4.32424e-06	0.192909	0.0183872	0.000194862	0.000338261	2.2676e-05	0.00482906	0.999991	2.7023e-05	0.000119374	0.280546	1.79691e-05	0.999965	0.101752	0.00797471	0.00980516	0.00495174	0.0251393	40	14	14	14	21	8	7	8	8	15	19	0.608694	0.617341
SOAT1	sterol O-acyltransferase 1	coding	red	0.0144845	-0.777047	-0.62637	-0.553813	-0.659973	0.208883	0.874452	0.956292	0.971966	0.871425	0.501754	0.929314	0.00107577	0.0165428	0.0399024	0.00113205	0.619587	0.0100144	0.000201964	5.39291e-05	2.324e-05	0.0286066	0.999991	0.002379	0.0272163	0.138846	0.00223145	0.999965	0.0982526	0.00816419	0.00508906	0.00495174	0.0856714	40	14	14	14	21	8	7	8	8	15	19	-0.0190289	0.146953
CYP1B1	cytochrome P450 family 1 subfamily B member 1	coding	blue	0.00923553	0.917454	0.976137	-0.719111	0.846702	0.112737	0.876726	0.968339	0.96697	0.871423	0.545777	0.954896	3.81567e-06	2.53255e-09	0.00374891	1.30207e-06	0.790402	0.0095793	7.74722e-05	8.78705e-05	2.32432e-05	0.0156399	0.999991	2.27913e-05	1.1817e-07	0.0375039	7.37007e-06	0.999965	0.0982526	0.00493627	0.00584952	0.00495174	0.0566503	40	14	14	14	21	8	7	8	8	15	19	0.716236	1.93011
OGDH	oxoglutarate dehydrogenase	coding	blue	0.00757802	0.242033	0.312169	-0.352597	0.301184	-0.303148	0.865144	0.921608	0.928007	0.871177	0.538315	0.962985	0.404464	0.277223	0.216277	0.184594	0.46546	0.0119128	0.00113465	0.000883187	2.35185e-05	0.0174207	0.999991	0.465204	0.335871	0.394864	0.22757	0.999965	0.0982526	0.0182363	0.0147994	0.00495174	0.0610715	40	14	14	14	21	8	7	8	8	15	19	1.20611	0.930918
SMAGP	small cell adhesion glycoprotein	coding	red	-0.00413162	-0.901965	-0.835417	-0.732771	-0.758731	0.00244862	0.908396	0.926327	0.929306	0.870688	0.684074	0.979814	1.03454e-05	0.000199291	0.00287221	6.6948e-05	0.995409	0.00464072	0.000945268	0.000837095	2.40751e-05	0.00123766	0.999991	4.95333e-05	0.000583208	0.0324793	0.000178668	0.999965	0.0982526	0.0168114	0.0145944	0.00495174	0.00985564	40	14	14	14	21	8	7	8	8	15	19	-0.711036	-0.745437
STOM	stomatin	coding	blue	0.0118793	0.968654	0.989677	-0.725145	0.876619	-0.131227	0.893154	0.949411	0.968972	0.870554	0.787451	0.942004	1.28013e-08	1.70849e-11	0.00333897	1.87035e-07	0.756759	0.00676124	0.000311527	7.29498e-05	2.423e-05	6.28625e-05	0.999991	3.37234e-07	4.80086e-09	0.0353316	2.25763e-06	0.999965	0.0982526	0.00978601	0.0056259	0.00495174	0.00124397	40	14	14	14	21	8	7	8	8	15	19	2.26781	2.39337
ATXN3	ataxin 3	coding	blue	0.0155609	0.967683	0.935249	0.500376	0.896326	0.208923	0.910998	0.93897	0.957644	0.870493	0.792814	0.924076	1.53407e-08	9.24529e-07	0.0684138	3.87706e-08	0.619519	0.00432445	0.000542587	0.00018399	2.43005e-05	5.15936e-05	0.999991	3.84887e-07	7.8991e-06	0.193101	1.35046e-06	0.999965	0.0982526	0.0128245	0.00759529	0.00495174	0.00108193	40	14	14	14	21	8	7	8	8	15	19	0.58428	0.646379
MTX2	metaxin 2	coding	brown	-0.0121791	-0.802145	-0.819032	0.239378	-0.838771	-0.134041	-0.879524	-0.946174	-0.947953	-0.870422	-0.515465	0.940543	0.000557135	0.000339196	0.409798	2.0351e-06	0.751668	0.009059	0.000374304	0.000338858	2.43827e-05	0.0238955	0.999991	0.00134894	0.000913863	0.587251	1.01741e-05	0.999965	0.0982526	0.0107326	0.00980516	0.00495174	0.0754077	40	14	14	14	21	8	7	8	8	15	19	-0.186514	-0.0559929
PLCB4	phospholipase C beta 4	coding	blue	0.0257259	0.952878	0.986804	-0.361063	0.823374	-0.0766417	0.86	0.923498	0.909632	0.870121	0.680495	0.874795	1.42746e-07	7.41075e-11	0.204677	4.54173e-06	0.856859	0.0130436	0.00105609	0.00172218	2.47345e-05	0.00134339	0.999991	1.90403e-06	1.22196e-08	0.382522	1.85738e-05	0.999965	0.0982526	0.0176477	0.0206809	0.00495174	0.0104412	40	14	14	14	21	8	7	8	8	15	19	0.508575	1.01037
CCDC69	coiled-coil domain containing 69	coding	blue	0.0100117	0.790681	0.957668	-0.376161	0.799802	-0.0664089	0.926182	0.949138	0.96563	0.869826	0.717789	0.95111	0.000760569	7.58173e-08	0.184984	1.35317e-05	0.875849	0.00273194	0.000316526	9.89016e-05	2.50834e-05	0.000539434	0.999991	0.00176434	1.20441e-06	0.358321	4.53626e-05	0.999965	0.0982526	0.00978601	0.00595529	0.00495174	0.00546566	40	14	14	14	21	8	7	8	8	15	19	0.695564	0.962691
AFTPH	aftiphilin	coding	blue	0.0255547	0.879789	0.863445	-0.115401	0.876056	0.453234	0.896797	0.942102	0.966111	0.86878	0.655712	0.875621	3.3464e-05	6.93007e-05	0.694431	1.94861e-07	0.259394	0.0062122	0.000464393	9.48433e-05	2.63542e-05	0.00230271	0.999991	0.000127494	0.000243081	0.812687	2.30713e-06	0.999965	0.0982526	0.0119112	0.00591777	0.00495174	0.0152529	40	14	14	14	21	8	7	8	8	15	19	0.351734	0.603679
DCUN1D3	defective in cullin neddylation 1 domain containing 3	coding	tan	0.0349069	0.633641	0.661233	0.0467172	0.578651	0.404243	-0.866623	-0.910497	-0.956748	-0.868735	-0.559534	0.830676	0.0149722	0.0100218	0.873994	0.00599264	0.320569	0.0115983	0.00167428	0.000195773	2.64092e-05	0.0127388	0.999991	0.024473	0.0174097	0.924747	0.0101415	0.999965	0.0982526	0.0220076	0.00766425	0.00495174	0.0490506	40	14	14	14	21	8	7	8	8	15	19	0.828236	1.25294
TNFAIP8L1	TNF alpha induced protein 8 like 1	coding	orange	0.0154333	0.0856671	-0.599097	0.673016	-0.244068	-0.0183728	-0.832232	-0.939181	-0.936194	-0.868717	-0.530426	0.924697	0.770908	0.0235721	0.008342	0.286331	0.965559	0.0201853	0.00053708	0.000618732	2.6432e-05	0.0194751	0.999991	0.808392	0.0373426	0.0578949	0.337937	0.999965	0.104651	0.0128245	0.0126402	0.00495174	0.0656851	40	14	14	14	21	8	7	8	8	15	19	0.43482	0.304106
APOL3	apolipoprotein L3	coding	blue	0.0242299	0.928191	0.896318	0.177602	0.851052	0.144931	0.85845	0.890002	0.862559	0.868208	0.581262	0.882023	1.69351e-06	1.42957e-05	0.543566	1.00838e-06	0.732036	0.013396	0.00305889	0.00584004	2.70706e-05	0.00905019	0.999991	1.19634e-05	6.77548e-05	0.700223	6.1599e-06	0.999965	0.0982526	0.0296396	0.037367	0.00495174	0.0389021	40	14	14	14	21	8	7	8	8	15	19	1.03304	0.899147
FBXO3	F-box protein 3	coding	blue	0.00787105	0.741641	0.734213	0.0296104	0.738098	0.336367	0.87446	0.959899	0.941729	0.868091	0.484059	0.961554	0.00239577	0.00279007	0.919961	0.000133602	0.415269	0.0100129	0.000156411	0.000473289	2.72195e-05	0.0357249	0.999991	0.00475506	0.00554899	0.953048	0.000328998	0.999965	0.0982526	0.00711444	0.0113133	0.00495174	0.0998764	40	14	14	14	21	8	7	8	8	15	19	0.246297	0.524205
ASAP3	ArfGAP with SH3 domain, ankyrin repeat and PH domain 3	coding	blue	0.00872129	0.961963	0.956895	0.156109	0.884988	0.154088	0.898079	0.947031	0.897276	0.86808	0.64596	0.957405	4.02804e-08	8.43771e-08	0.59408	9.92764e-08	0.715626	0.00602532	0.000356946	0.00250542	2.72331e-05	0.00281061	0.999991	7.72759e-07	1.30593e-06	0.740722	1.68052e-06	0.999965	0.0982526	0.0105558	0.0239102	0.00495174	0.0175941	40	14	14	14	21	8	7	8	8	15	19	1.1441	1.08842
CCND3	cyclin D3	coding	blue	0.0169806	0.0440658	0.66009	-0.691853	0.351557	-0.13312	0.895958	0.957681	0.978345	0.867692	0.573456	0.917172	0.881098	0.0101976	0.00611833	0.11811	0.753334	0.00633616	0.000183513	2.49762e-05	2.77304e-05	0.0102597	0.999991	0.902363	0.0176884	0.0486274	0.152086	0.999965	0.0982526	0.00773163	0.00402794	0.00495174	0.0423827	40	14	14	14	21	8	7	8	8	15	19	0.682306	0.810788
GNAZ	G protein subunit alpha z	coding	blue	0.00557139	0.817624	0.87574	-0.216499	0.782932	-0.0585025	0.88057	0.976275	0.978964	0.867657	0.640402	0.972782	0.000354184	4.04509e-05	0.457224	2.71828e-05	0.890558	0.00886892	3.27923e-05	2.29072e-05	2.77758e-05	0.00313933	0.999991	0.000920019	0.000155756	0.629405	8.15292e-05	0.999965	0.0982526	0.0039175	0.00402308	0.00495174	0.0189123	40	14	14	14	21	8	7	8	8	15	19	-0.711036	-0.77025
MEX3D	mex-3 RNA binding family member D	coding	yellow	-0.0296336	-0.907837	-0.95176	0.414736	-0.306884	0.420324	-0.685953	-0.968248	-0.963314	-0.867384	-0.579128	0.855963	7.23553e-06	1.63903e-07	0.140348	0.176015	0.299797	0.0888529	7.81339e-05	0.000120066	2.81318e-05	0.00936867	0.999991	3.73138e-05	2.14996e-06	0.301563	0.218079	0.999965	0.252557	0.00493627	0.00632761	0.00495174	0.0398113	40	14	14	14	21	8	7	8	8	15	19	0.438711	0.18608
PLOD1	procollagen-lysine,2-oxoglutarate 5-dioxygenase 1	coding	yellow	-0.0198001	-0.944625	-0.929799	0.0265327	-0.86433	-0.232196	-0.866432	-0.934272	-0.875125	-0.867154	-0.69495	0.903479	3.69192e-07	1.4836e-06	0.928259	4.38494e-07	0.580028	0.0116388	0.000675367	0.00442367	2.84339e-05	0.000958113	0.999991	3.73176e-06	1.13081e-05	0.957866	3.70639e-06	0.999965	0.0982526	0.0142386	0.0319642	0.00495174	0.00819157	40	14	14	14	21	8	7	8	8	15	19	1.17899	1.10464
CHST15	carbohydrate sulfotransferase 15	coding	salmon	-0.00205269	-0.0728171	-0.566111	0.505652	-0.296349	-0.155232	-0.833181	-0.982429	-0.982589	-0.867072	-0.581	0.98997	0.804613	0.0348272	0.0650919	0.192091	0.713582	0.0199116	1.33834e-05	1.30231e-05	2.85414e-05	0.00908886	0.999991	0.837324	0.0532322	0.187036	0.236145	0.999965	0.104215	0.00330698	0.00336076	0.00495174	0.0389749	40	14	14	14	21	8	7	8	8	15	19	0.319983	-0.263084
KRT10	keratin 10	coding	brown	-0.0350194	-0.250948	-0.257487	-0.368382	-0.284866	0.381912	-0.861384	-0.912416	-0.917194	-0.866976	-0.623784	0.830138	0.386824	0.374151	0.194973	0.21071	0.350498	0.0127336	0.00157122	0.00133276	2.86692e-05	0.00431677	0.999991	0.447233	0.43605	0.371468	0.256763	0.999965	0.0982526	0.0213867	0.0179667	0.00495174	0.023234	40	14	14	14	21	8	7	8	8	15	19	-1.61158	-0.557954
BTG2	BTG anti-proliferation factor 2	coding	blue	0.0976718	0.973614	0.973374	-0.0352566	0.884451	0.723504	0.843432	0.971008	0.888448	0.866817	0.619295	0.548787	4.60308e-09	4.85765e-09	0.904757	1.03542e-07	0.0424927	0.0170914	5.96068e-05	0.00318647	2.88818e-05	0.00469054	0.999991	1.79717e-07	1.79605e-07	0.944259	1.70914e-06	0.999965	0.0999632	0.00470968	0.0271272	0.00495174	0.0246619	40	14	14	14	21	8	7	8	8	15	19	2.23606	2.43338
INSIG1	insulin induced gene 1	coding	blue	-0.00338773	0.797395	0.872398	-0.105115	0.785067	0.5373	0.884491	0.941643	0.907189	0.866704	0.606921	0.983448	0.000635309	4.70785e-05	0.72062	2.49708e-05	0.169663	0.00817671	0.000475347	0.00186213	2.90322e-05	0.00586037	0.999991	0.00151204	0.000175867	0.831456	7.59211e-05	0.999965	0.0982526	0.0120215	0.0212707	0.00495174	0.028823	40	14	14	14	21	8	7	8	8	15	19	1.04085	1.25197
S100A4	S100 calcium binding protein A4	coding	blue	0.0230679	0.877035	0.904936	-0.287243	0.897327	-0.206576	0.880238	0.971443	0.971429	0.866509	0.668341	0.887644	3.80983e-05	8.65838e-06	0.31937	3.54996e-08	0.623547	0.00892893	5.69823e-05	5.70668e-05	2.92953e-05	0.00176038	0.999991	0.000141359	4.5472e-05	0.501046	1.3164e-06	0.999965	0.0982526	0.00464352	0.00520449	0.00495174	0.0126746	40	14	14	14	21	8	7	8	8	15	19	-0.889157	-1.18763
MLKL	mixed lineage kinase domain like pseudokinase	coding	darkgreen	-0.00299609	-0.836784	-0.109727	-0.828167	-0.448509	0.306286	0.774365	0.987679	0.991088	0.866461	0.529489	0.985361	0.000190158	0.70884	0.000253864	0.0414229	0.460619	0.0409592	4.63328e-06	1.75749e-06	2.93601e-05	0.0197313	0.999991	0.00054242	0.753977	0.0137773	0.0588465	0.999965	0.153007	0.00330387	0.00257874	0.00495174	0.0662865	40	14	14	14	21	8	7	8	8	15	19	0.398724	0.545807
COLEC12	collectin subfamily member 12	coding	tan	0.00627572	0.837866	0.647835	0.323245	0.705752	-0.317601	-0.866415	-0.970886	-0.920356	-0.866454	-0.759518	0.969343	0.00018317	0.012236	0.259611	0.000350936	0.443332	0.0116423	6.03557e-05	0.00118877	2.93698e-05	0.000161931	0.999991	0.00052633	0.0208019	0.440536	0.000777296	0.999965	0.0982526	0.00470968	0.0169726	0.00495174	0.00234135	40	14	14	14	21	8	7	8	8	15	19	0.769945	1.23722
TXNRD2	thioredoxin reductase 2	coding	brown	-0.00667831	-0.887847	-0.942047	0.511548	-0.845463	-0.490797	-0.877391	-0.919968	-0.928987	-0.865323	-0.651856	0.967377	2.2471e-05	4.82387e-07	0.0615188	1.3984e-06	0.216856	0.00945402	0.00120582	0.000848255	3.09365e-05	0.00249358	0.999991	9.22553e-05	4.81435e-06	0.180319	7.73991e-06	0.999965	0.0982526	0.0186965	0.0146645	0.00503111	0.0161286	40	14	14	14	21	8	7	8	8	15	19	0.246297	0.158387
AKAP1	A-kinase anchoring protein 1	coding	pink	-0.0077032	-0.72821	-0.44463	-0.566135	-0.565997	0.0432115	0.899608	0.941366	0.968357	0.865213	0.692987	0.962374	0.00314473	0.111173	0.0348179	0.00748329	0.919079	0.00580682	0.000482059	7.73401e-05	3.10932e-05	0.00100421	0.999991	0.00604792	0.149615	0.127652	0.0124084	0.999965	0.0982526	0.0120945	0.00570677	0.00503111	0.00845981	40	14	14	14	21	8	7	8	8	15	19	0.360532	0.262434
RTN4	reticulon 4	coding	brown	-0.0139806	-0.950991	-0.923148	-0.782596	-0.889599	-0.0295755	-0.919701	-0.937087	-0.933346	-0.86519	-0.441128	0.931768	1.79925e-07	2.5165e-06	0.000936905	6.8564e-08	0.944578	0.00335957	0.000593539	0.000703799	3.11258e-05	0.0586792	0.999991	2.26158e-06	1.72099e-05	0.020013	1.51044e-06	0.999965	0.0982526	0.0134023	0.0133828	0.00503111	0.142309	40	14	14	14	21	8	7	8	8	15	19	1.32811	1.29421
FBXW7	F-box and WD repeat domain containing 7	coding	blue	0.0224634	0.835496	0.631335	0.743035	0.698914	0.489659	0.887086	0.945159	0.891228	0.864817	0.494045	0.89057	0.000198754	0.0154574	0.00232697	0.000423629	0.218088	0.00773626	0.000395573	0.00296053	3.16597e-05	0.0315569	0.999991	0.000562752	0.02563	0.0291044	0.000919306	0.999965	0.0982526	0.0110048	0.0262247	0.00503111	0.0915851	40	14	14	14	21	8	7	8	8	15	19	0.351734	0.485327
SLC9A3R2	SLC9A3 regulator 2	coding	blue	0.021639	0.712962	0.838646	-0.573506	0.759654	-0.295077	0.893676	0.984945	0.986787	0.864144	0.498343	0.894563	0.00420639	0.000178269	0.0320152	6.48083e-05	0.478007	0.00668092	8.43436e-06	5.71014e-06	3.26425e-05	0.0298841	0.999991	0.00783702	0.00053178	0.122268	0.000173513	0.999965	0.0982526	0.00330387	0.00257874	0.00503111	0.0882084	40	14	14	14	21	8	7	8	8	15	19	1.34201	1.1843
CNTNAP3	contactin associated protein family member 3	coding	tan	-0.00838845	0.855752	0.761837	0.640268	0.753733	-0.38042	-0.844468	-0.904826	-0.91298	-0.863978	-0.605295	0.959029	9.4618e-05	0.00154219	0.0136422	7.96227e-05	0.352543	0.0168198	0.00200435	0.00154174	3.28895e-05	0.00603044	0.999991	0.000302821	0.0033318	0.075627	0.000207337	0.999965	0.0997795	0.0241381	0.0194176	0.00503111	0.0293627	40	14	14	14	21	8	7	8	8	15	19	0.419021	0.395542
MMRN2	multimerin 2	coding	blue	0.0178138	0.987017	0.97226	0.276338	0.841773	-0.228442	0.90106	0.954167	0.953183	0.863261	0.630948	0.913123	6.7248e-11	6.1967e-09	0.338889	1.72346e-06	0.58634	0.00560363	0.000232501	0.000247621	3.39717e-05	0.00377116	0.999991	1.26918e-08	2.10073e-07	0.520455	8.98804e-06	0.999965	0.0982526	0.00867249	0.00846261	0.00503111	0.0212696	40	14	14	14	21	8	7	8	8	15	19	2.63904	2.62236
KLF11	Kruppel like factor 11	coding	blue	0.016732	0.952523	0.970848	-0.182963	0.857886	-0.111322	0.935529	0.913133	0.910095	0.863211	0.628057	0.918381	1.49205e-07	8.32212e-09	0.531263	6.63729e-07	0.792989	0.00195751	0.00153383	0.00169645	3.40484e-05	0.00398407	0.999991	1.95715e-06	2.57924e-07	0.690172	4.75785e-06	0.999965	0.0982526	0.0210133	0.0205082	0.00503111	0.0220418	40	14	14	14	21	8	7	8	8	15	19	0.446424	0.943823
CTTN	cortactin	coding	yellow	-0.0236497	-0.793207	-0.83969	0.169576	-0.851211	0.0144596	-0.84382	-0.967796	-0.974079	-0.863157	-0.603654	0.884829	0.000711318	0.00017187	0.562209	9.98861e-07	0.972892	0.0169895	8.14956e-05	4.26973e-05	3.41305e-05	0.00620613	0.999991	0.00166783	0.000515609	0.715122	6.1348e-06	0.999965	0.0997795	0.00505153	0.0046586	0.00503111	0.0299414	40	14	14	14	21	8	7	8	8	15	19	1.60089	1.3596
FAM168B	family with sequence similarity 168 member B	coding	brown	-0.00959725	-0.860136	-0.826951	-0.249051	-0.809125	-0.117622	-0.852287	-0.989061	-0.957118	-0.86292	-0.683437	0.953131	7.94112e-05	0.000264101	0.390543	8.94446e-06	0.781484	0.0148505	3.24596e-06	0.000190846	3.44955e-05	0.00125595	0.999991	0.000261363	0.000737697	0.568486	3.1968e-05	0.999965	0.0982526	0.00330387	0.00759529	0.00503111	0.00995709	40	14	14	14	21	8	7	8	8	15	19	0.933117	0.863847
OSBPL10	oxysterol binding protein like 10	coding	salmon	-0.0087888	-0.799072	-0.968362	0.627914	-0.8053	0.0577796	-0.908938	-0.924123	-0.945705	-0.862807	-0.665049	0.957076	0.000606767	1.35251e-08	0.0161993	1.06282e-05	0.891904	0.00457383	0.00103091	0.000384033	3.46714e-05	0.00189028	0.999991	0.00145452	3.61576e-07	0.083336	3.69111e-05	0.999965	0.0982526	0.0174044	0.0103008	0.00503111	0.0132645	40	14	14	14	21	8	7	8	8	15	19	-0.553251	-0.489916
EMC8	ER membrane protein complex subunit 8	coding	yellow	-0.0707725	-0.968153	-0.957928	-0.571378	-0.462167	0.108273	-0.829222	-0.898331	-0.887969	-0.862804	-0.602433	0.664321	1.40642e-08	7.31137e-08	0.0328063	0.0349147	0.798569	0.0210667	0.00243103	0.0032265	3.46761e-05	0.00633952	0.999991	3.65178e-07	1.16585e-06	0.124346	0.0503646	0.999965	0.105962	0.0262157	0.0272539	0.00503111	0.0304225	40	14	14	14	21	8	7	8	8	15	19	-0.217344	-0.285847
RALGPS2	Ral GEF with PH domain and SH3 binding motif 2	coding	yellow	-0.00521962	-0.878192	-0.907532	0.555388	-0.843093	-0.317729	-0.875307	-0.952739	-0.94378	-0.862588	-0.500251	0.9745	3.60911e-05	7.37538e-06	0.0392236	1.60034e-06	0.443138	0.00984941	0.000254638	0.000425705	3.50129e-05	0.0291641	0.999991	0.000135462	4.00609e-05	0.137284	8.53719e-06	0.999965	0.0982526	0.00901931	0.0107812	0.00503111	0.0868126	40	14	14	14	21	8	7	8	8	15	19	-0.860562	-0.359624
KCTD5	potassium channel tetramerization domain containing 5	coding	yellow	-0.0291037	-0.986646	-0.969889	-0.557747	-0.728431	0.822068	-0.827972	-0.978458	-0.918532	-0.861769	-0.564776	0.858512	7.9571e-11	1.00845e-08	0.0382235	0.000180806	0.0122707	0.0214391	2.45902e-05	0.0012705	3.63177e-05	0.0117546	0.999991	1.41715e-08	2.96555e-07	0.134798	0.000429916	0.829751	0.106964	0.00364605	0.0176737	0.00511736	0.0463909	40	14	14	14	21	8	7	8	8	15	19	-0.357535	-0.309477
DROSHA	drosha ribonuclease III	coding	yellow	-0.0136551	-0.625253	-0.414083	-0.57469	-0.519404	0.174582	-0.913393	-0.88056	-0.959027	-0.861704	-0.695699	0.933352	0.0167947	0.141037	0.0315811	0.0158195	0.679249	0.00404468	0.00388731	0.000166723	3.64225e-05	0.000941004	0.999991	0.0271121	0.185119	0.121412	0.0244965	0.999965	0.0982526	0.0333672	0.0074495	0.00511736	0.00809789	40	14	14	14	21	8	7	8	8	15	19	0.865762	0.676578
CCDC71	coiled-coil domain containing 71	coding	yellow	-0.0264531	-0.584313	-0.732065	0.376247	-0.648295	-0.958141	-0.653149	-0.982335	-0.968133	-0.861358	-0.674256	0.871285	0.0282137	0.00291313	0.184876	0.0014806	0.000177659	0.111673	1.35993e-05	7.89826e-05	3.69864e-05	0.00154569	0.999991	0.0433595	0.00575763	0.358223	0.00284575	0.187208	0.290528	0.00330698	0.00570677	0.00513949	0.0115721	40	14	14	14	21	8	7	8	8	15	19	-0.166736	-0.274361
RAI14	retinoic acid induced 14	coding	brown	-0.0246554	-0.857882	-0.853074	-0.188842	-0.817543	-0.138067	-0.861076	-0.970232	-0.895162	-0.861097	-0.54424	0.879966	8.69578e-05	0.000105018	0.517915	6.0355e-06	0.744395	0.0128023	6.44816e-05	0.0026589	3.74166e-05	0.0159941	0.999991	0.000282088	0.000342874	0.678657	2.32469e-05	0.999965	0.0982526	0.00474052	0.0246228	0.00514275	0.0575378	40	14	14	14	21	8	7	8	8	15	19	1.64571	1.60134
KLHL23	kelch like family member 23	coding	yellow	-0.0051233	-0.893022	-0.93391	0.508346	-0.857691	0.0317798	-0.875269	-0.861274	-0.91776	-0.860804	-0.686843	0.97497	1.71218e-05	1.04228e-06	0.0634416	6.71892e-07	0.940453	0.00985675	0.00599921	0.0013062	3.79055e-05	0.00116073	0.999991	7.42729e-05	8.58045e-06	0.184122	4.78426e-06	0.999965	0.0982526	0.042883	0.0178175	0.00515392	0.00939059	40	14	14	14	21	8	7	8	8	15	19	-0.889157	-0.523003
SLC45A3	solute carrier family 45 member 3	coding	lightcyan	0.000846426	0.0881645	-0.573267	0.767709	-0.19557	-0.129088	0.881821	0.962954	0.951565	0.86043	0.791569	0.995864	0.764399	0.0321034	0.0013462	0.395556	0.760635	0.00864454	0.000123604	0.00027384	3.85351e-05	5.4041e-05	0.999991	0.803086	0.0494335	0.0229739	0.451223	0.999965	0.0982526	0.00635356	0.00894931	0.00518379	0.00111476	40	14	14	14	21	8	7	8	8	15	19	0.163299	-0.263084
RNF4	ring finger protein 4	coding	yellow	-0.0344713	-0.929908	-0.90179	-0.795656	-0.884126	0.557055	-0.865059	-0.928623	-0.870116	-0.859876	-0.606316	0.832759	1.47015e-06	1.04526e-05	0.000666038	1.06199e-07	0.151481	0.0119309	0.000861141	0.0049581	3.94861e-05	0.00592318	0.999991	1.06962e-05	5.29325e-05	0.0181653	1.72328e-06	0.999965	0.0982526	0.0160844	0.0341391	0.00518646	0.0290291	40	14	14	14	21	8	7	8	8	15	19	0.558924	0.299612
CHN1	chimerin 1	coding	blue	0.00749619	0.41881	0.426475	0.117487	0.397294	0.374875	0.875711	0.93799	0.954312	0.859743	0.694495	0.963384	0.1361	0.128342	0.689156	0.0745232	0.360185	0.00977204	0.000568742	0.000230333	3.97168e-05	0.000968646	0.999991	0.177934	0.170168	0.809066	0.100239	0.999965	0.0982526	0.0130285	0.00813566	0.00518646	0.00823707	40	14	14	14	21	8	7	8	8	15	19	0.00391215	0.180639
IGFBP5	insulin like growth factor binding protein 5	coding	blue	0.0169397	0.978511	0.989601	-0.0889555	0.88576	-0.521352	0.821604	0.979851	0.988794	0.859637	0.651353	0.917371	1.35746e-09	1.78501e-11	0.762341	9.34128e-08	0.185155	0.0233934	2.01414e-05	3.48867e-06	3.99013e-05	0.00251941	0.999991	8.37319e-08	4.90684e-09	0.857175	1.64244e-06	0.999965	0.11124	0.00364153	0.00257874	0.00518646	0.0162624	40	14	14	14	21	8	7	8	8	15	19	1.74703	1.25197
CDC25B	cell division cycle 25B	coding	red	0.0101566	-0.92201	-0.894058	-0.556324	-0.863696	0.0909704	0.87996	0.975508	0.945683	0.859371	0.572326	0.950403	2.7417e-06	1.61888e-05	0.0388245	4.57183e-07	0.830369	0.00897948	3.60574e-05	0.000384497	4.03686e-05	0.010445	0.999991	1.75395e-05	7.45747e-05	0.136258	3.78096e-06	0.999965	0.0982526	0.00410762	0.0103008	0.00518646	0.0428857	40	14	14	14	21	8	7	8	8	15	19	0.472731	0.375913
ZBTB11	zinc finger and BTB domain containing 11	coding	darkgreen	0.0044556	-0.310908	0.0179368	-0.402345	-0.115664	0.42165	0.795707	0.980987	0.980878	0.858543	0.630507	0.978231	0.279272	0.95147	0.153809	0.617592	0.298114	0.0323463	1.69398e-05	1.72311e-05	4.18502e-05	0.00380298	0.999991	0.335684	0.96074	0.318944	0.667247	0.999965	0.132576	0.00357007	0.00357067	0.00518646	0.0213822	40	14	14	14	21	8	7	8	8	15	19	0.276769	0.560789
SLC7A7	solute carrier family 7 member 7	coding	salmon	0.00327462	-0.0160963	-0.571079	0.616724	-0.256682	0.0269589	-0.91865	-0.925905	-0.95642	-0.85841	-0.595149	0.984	0.956446	0.0329187	0.0188161	0.261359	0.949477	0.00346857	0.000961275	0.000200221	4.20931e-05	0.00718486	0.999991	0.963839	0.0505779	0.0909516	0.311657	0.999965	0.0982526	0.016859	0.00774249	0.00518646	0.0333281	40	14	14	14	21	8	7	8	8	15	19	-0.426094	-0.823067
NAA10	N-alpha-acetyltransferase 10, NatA catalytic subunit	coding	darkgreen	0.0010539	-0.179548	-0.130782	-0.0785625	-0.156828	0.14254	0.831449	0.96456	0.955388	0.857921	0.521961	0.99485	0.539086	0.655856	0.7895	0.497207	0.736335	0.0204124	0.000108346	0.000214606	4.29928e-05	0.0218883	0.999991	0.598906	0.706771	0.874364	0.552331	0.999965	0.104916	0.00580521	0.00795806	0.00518646	0.0711693	40	14	14	14	21	8	7	8	8	15	19	0.235817	0.407028
JUN	Jun proto-oncogene, AP-1 transcription factor subunit	coding	tan	0.0538202	0.962816	0.965972	-0.0393566	0.368731	0.159354	-0.860682	-0.937868	-0.940107	-0.857876	-0.542761	0.741525	3.52202e-08	2.08284e-08	0.893735	0.100005	0.706231	0.0128903	0.000572031	0.000513267	4.30775e-05	0.0163411	0.999991	7.03429e-07	4.86831e-07	0.937321	0.130732	0.999965	0.0982526	0.0130528	0.011822	0.00518646	0.058338	40	14	14	14	21	8	7	8	8	15	19	2.62718	2.92513
TEK	TEK receptor tyrosine kinase	coding	blue	0.0135931	0.978085	0.989822	-0.331018	0.8825	0.00791396	0.923027	0.946745	0.947371	0.857764	0.551708	0.933655	1.52579e-09	1.57024e-11	0.247663	1.20441e-07	0.985162	0.00302793	0.000362671	0.000350197	4.32871e-05	0.0143306	0.999991	8.89105e-08	4.6176e-09	0.42818	1.80234e-06	0.999965	0.0982526	0.0106651	0.00986245	0.00518646	0.0530943	40	14	14	14	21	8	7	8	8	15	19	2.32552	2.25058
KCNN3	potassium calcium-activated channel subfamily N member 3	coding	blue	0.0447603	0.969543	0.97391	-0.478178	0.497505	0.239586	0.918573	0.929268	0.870463	0.857735	0.622506	0.783893	1.07917e-08	4.30466e-09	0.0837171	0.0217446	0.567671	0.00347671	0.000838414	0.00491977	4.33407e-05	0.00442055	0.999991	3.03065e-07	1.68522e-07	0.21785	0.0326829	0.999965	0.0982526	0.0158263	0.0340506	0.00518646	0.0235956	40	14	14	14	21	8	7	8	8	15	19	0.897411	0.984001
EPS15L1	epidermal growth factor receptor pathway substrate 15 like 1	coding	steelblue	-0.0108544	0.154979	0.403171	-0.428797	0.299251	-0.692578	0.55527	0.986982	0.925928	0.857707	0.750386	0.947	0.596785	0.152887	0.126053	0.187567	0.0569176	0.195674	5.46177e-06	0.000960396	4.33927e-05	0.000214842	0.999991	0.652372	0.19869	0.281715	0.23092	0.999965	0.41718	0.00330387	0.0151088	0.00518646	0.0028123	40	14	14	14	21	8	7	8	8	15	19	0.419021	0.290524
NMT2	N-myristoyltransferase 2	coding	brown	-0.0167871	-0.930885	-0.895692	-0.231489	-0.84085	-0.252763	-0.896367	-0.956768	-0.905331	-0.857662	-0.536418	0.918112	1.35432e-06	1.48008e-05	0.425855	1.81446e-06	0.545869	0.00627554	0.000195505	0.00197337	4.34769e-05	0.017898	0.999991	1.00346e-05	6.95749e-05	0.601131	9.33055e-06	0.999965	0.0982526	0.00797471	0.0216608	0.00518646	0.0621247	40	14	14	14	21	8	7	8	8	15	19	0.338314	0.312999
SLC8B1	solute carrier family 8 member B1	coding	blue	0.00881618	0.50985	0.780875	-0.51936	0.622438	0.26433	0.864955	0.872537	0.930267	0.857397	0.665633	0.956942	0.0625329	0.000978328	0.0570033	0.00258427	0.526983	0.0119532	0.00469487	0.000804014	4.39773e-05	0.00186665	0.999991	0.0887661	0.00225995	0.17203	0.00472432	0.999965	0.0982526	0.0373161	0.0143724	0.00518875	0.0131424	40	14	14	14	21	8	7	8	8	15	19	0.726333	0.656609
STPG1	sperm tail PG-rich repeat containing 1	coding	blue	0.0195138	0.790947	0.818441	-0.141309	0.767089	-0.120405	0.88611	0.91051	0.8686	0.857142	0.558407	0.904868	0.000755252	0.00034542	0.629903	4.96304e-05	0.776413	0.00790023	0.0016736	0.00512764	4.44615e-05	0.0129589	0.999991	0.00175426	0.000928143	0.766167	0.000137596	0.999965	0.0982526	0.0220076	0.0347753	0.00518875	0.0496411	40	14	14	14	21	8	7	8	8	15	19	-0.0844319	-0.309477
ELOVL1	ELOVL fatty acid elongase 1	coding	darkgreen	-0.00871967	-0.548377	-0.0447285	-0.703595	-0.274381	-0.122139	0.879141	0.950993	0.987105	0.857003	0.482101	0.957413	0.0423109	0.879321	0.00498617	0.228726	0.773257	0.00912933	0.000283538	5.3093e-06	4.47271e-05	0.0365901	0.999991	0.0625852	0.90142	0.0433893	0.276557	0.999965	0.0982526	0.00946556	0.00257874	0.00518875	0.101424	40	14	14	14	21	8	7	8	8	15	19	1.17012	0.890509
NPEPPS	aminopeptidase puromycin sensitive	coding	blue	0.0172151	0.874289	0.898593	-0.424008	0.7851	-0.247501	0.829045	0.927707	0.899594	0.856495	0.604703	0.916032	4.32286e-05	1.25774e-05	0.130805	2.49377e-05	0.554538	0.0211194	0.000894067	0.00234384	4.57128e-05	0.00609329	0.999991	0.000156626	6.11464e-05	0.28862	7.5875e-05	0.999965	0.105994	0.0163112	0.0230825	0.00524802	0.029589	40	14	14	14	21	8	7	8	8	15	19	1.03147	0.988474
CDKN2D	cyclin dependent kinase inhibitor 2D	coding	blue	0.026526	0.862125	0.898749	-0.178197	0.860331	0.181615	0.923764	0.877331	0.931099	0.856314	0.589081	0.870933	7.32006e-05	1.24662e-05	0.542195	5.68498e-07	0.666885	0.00295717	0.00420057	0.000776074	4.60681e-05	0.00795703	0.999991	0.000243777	6.07221e-05	0.699098	4.3227e-06	0.999965	0.0982526	0.0348303	0.0140843	0.00524802	0.0358016	40	14	14	14	21	8	7	8	8	15	19	-0.627422	-0.21992
TRIM7	tripartite motif containing 7	coding	red	-0.000505812	-0.839034	-0.965072	0.804356	-0.8257	0.566816	0.886612	0.89406	0.908257	0.85536	0.628672	0.997528	0.000175866	2.43097e-08	0.000523485	4.04319e-06	0.142913	0.00781566	0.00274133	0.00180009	4.79769e-05	0.00393798	0.999991	0.000509234	5.43022e-07	0.0172703	1.70762e-05	0.999965	0.0982526	0.0278774	0.0209724	0.00540844	0.0218786	40	14	14	14	21	8	7	8	8	15	19	-2.334	-1.97716
SH3BP2	SH3 domain binding protein 2	coding	blue	0.0136795	0.871611	0.807875	0.364368	0.835759	-0.239585	0.822077	0.970709	0.928569	0.855186	0.46814	0.933234	4.87612e-05	0.000473312	0.200258	2.39631e-06	0.567673	0.023245	6.14549e-05	0.000863042	4.83317e-05	0.0432358	0.999991	0.000173344	0.00121672	0.377611	1.14908e-05	0.999965	0.110804	0.00470968	0.0147078	0.00540844	0.113923	40	14	14	14	21	8	7	8	8	15	19	1.5662	1.11684
ADCY4	adenylate cyclase 4	coding	blue	0.0124543	0.940442	0.941177	0.5169	0.898337	0.0865169	0.876527	0.976348	0.957106	0.854726	0.463172	0.939202	5.6629e-07	5.26482e-07	0.0583984	3.24489e-08	0.838588	0.00961689	3.24963e-05	0.000191009	4.92802e-05	0.0458114	0.999991	5.14421e-06	5.13314e-06	0.174688	1.27838e-06	0.999965	0.0982526	0.0039175	0.00759529	0.00545845	0.118901	40	14	14	14	21	8	7	8	8	15	19	2.19469	2.05392
MYL12A	myosin light chain 12A	coding	yellow	-0.026219	-0.777033	-0.761283	-0.261556	-0.783473	0.00744992	-0.851135	-0.979785	-0.948587	-0.853456	-0.635159	0.872414	0.00107615	0.00156182	0.366379	2.66072e-05	0.986032	0.0151319	2.03388e-05	0.000326775	5.19824e-05	0.00347793	0.999991	0.00237941	0.00336807	0.544978	8.00684e-05	0.999965	0.0983766	0.00364153	0.00971201	0.00545845	0.0202923	40	14	14	14	21	8	7	8	8	15	19	1.06524	1.44563
PYCR3	pyrroline-5-carboxylate reductase 3	coding	yellow	-0.117431	-0.883137	-0.87045	0.186857	-0.859973	0.531162	-0.891764	-0.933502	-0.943321	-0.853437	-0.669598	0.470511	2.846e-05	5.13333e-05	0.522405	5.81658e-07	0.175539	0.00697796	0.000698965	0.000436076	5.2024e-05	0.00171281	0.999991	0.000111555	0.000188859	0.682798	4.39244e-06	0.999965	0.0982526	0.014513	0.0108761	0.00545845	0.012426	40	14	14	14	21	8	7	8	8	15	19	-0.519083	-1.69682
TMTC1	transmembrane O-mannosyltransferase targeting cadherins 1	coding	blue	0.00628267	0.90822	0.973918	-0.821334	0.844926	0.00926882	0.834843	0.86234	0.91642	0.853434	0.723574	0.969309	7.06329e-06	4.29654e-09	0.000315783	1.44207e-06	0.982622	0.0194379	0.00586691	0.00136969	5.20289e-05	0.000462369	0.999991	3.66197e-05	1.68522e-07	0.0145463	7.89734e-06	0.999965	0.103144	0.0424985	0.018289	0.00545845	0.0048967	40	14	14	14	21	8	7	8	8	15	19	1.91511	2.23005
CAMK1	calcium/calmodulin dependent protein kinase I	coding	red	0.0368084	-0.723667	-0.768841	-0.152785	-0.719114	0.285692	0.847602	0.976748	0.942102	0.853131	0.629448	0.821597	0.00343593	0.00131077	0.602055	0.000239231	0.492762	0.0160137	3.08843e-05	0.000464395	5.2692e-05	0.00388042	0.999991	0.00653934	0.00288859	0.746059	0.000553333	0.999965	0.0984975	0.0039175	0.0112928	0.00545845	0.0216731	40	14	14	14	21	8	7	8	8	15	19	-1.05442	-0.978939
GMIP	GEM interacting protein	coding	orange	-0.000782694	0.0123168	-0.33026	0.448048	-0.155716	0.00327963	-0.923601	-0.919592	-0.940804	-0.852877	-0.719128	0.996176	0.966666	0.248813	0.108126	0.500303	0.993851	0.00297278	0.00122255	0.000495823	5.32533e-05	0.000520692	0.999991	0.972279	0.305519	0.256665	0.555157	0.999965	0.0982526	0.0187839	0.0116537	0.00545845	0.00534537	40	14	14	14	21	8	7	8	8	15	19	-0.00364628	-0.309477
ESM1	endothelial cell specific molecule 1	coding	yellow	-0.0458761	-0.946753	-0.942703	-0.42728	-0.358191	-0.167097	-0.872629	-0.95797	-0.907971	-0.852874	-0.515292	0.778639	2.93203e-07	4.51167e-07	0.127546	0.110857	0.692476	0.0103713	0.000179817	0.00181655	5.32611e-05	0.0239506	0.999991	3.17428e-06	4.58474e-06	0.283348	0.143758	0.999965	0.0982526	0.00769976	0.0210218	0.00545845	0.0755063	40	14	14	14	21	8	7	8	8	15	19	-0.0347799	-1.05421
CERK	ceramide kinase	coding	yellow	-0.0281763	-0.791636	-0.83045	0.530023	-0.816312	-0.042557	-0.881658	-0.95725	-0.895891	-0.852494	-0.553944	0.862977	0.000741649	0.000235519	0.0512328	6.40054e-06	0.920302	0.00867364	0.000189117	0.00260533	5.4108e-05	0.0138605	0.999991	0.00172774	0.000669546	0.161763	2.43267e-05	0.999965	0.0982526	0.00784059	0.0243492	0.00545845	0.0519614	40	14	14	14	21	8	7	8	8	15	19	1.02355	0.586878
ABCA6	ATP binding cassette subfamily A member 6	coding	yellow	-0.0118104	-0.793774	-0.809671	0.218135	-0.795871	0.127355	-0.912564	-0.929781	-0.918227	-0.852123	-0.582704	0.94234	0.000700621	0.000449237	0.453747	1.60109e-05	0.763779	0.00414021	0.000820626	0.00128456	5.49484e-05	0.00884001	0.999991	0.00164611	0.00116358	0.626454	5.21127e-05	0.999965	0.0982526	0.0157838	0.0177477	0.00545845	0.0384527	40	14	14	14	21	8	7	8	8	15	19	-1.61158	-1.59321
EEF1B2	eukaryotic translation elongation factor 1 beta 2	coding	yellow	-0.0266757	-0.401873	-0.6152	0.363693	-0.385456	-0.146822	-0.848446	-0.891193	-0.851324	-0.852023	-0.675106	0.870211	0.154338	0.0191958	0.201155	0.0844141	0.72864	0.0158004	0.00296332	0.00732713	5.51764e-05	0.00151672	0.999991	0.198738	0.0310874	0.378739	0.112289	0.999965	0.0984887	0.0292972	0.0420379	0.00545845	0.0114092	40	14	14	14	21	8	7	8	8	15	19	0.877809	0.849145
TUBE1	tubulin epsilon 1	coding	blue	-0.0251442	0.402438	0.769589	-0.585355	0.549524	0.493448	0.908812	0.920038	0.96637	0.851924	0.754169	0.877604	0.153705	0.00128781	0.0278659	0.00986796	0.214002	0.00458935	0.00120275	9.27025e-05	5.54032e-05	0.000191371	0.999991	0.197963	0.00284492	0.112817	0.0159688	0.999965	0.0982526	0.018684	0.00591777	0.00545845	0.00259367	40	14	14	14	21	8	7	8	8	15	19	-0.119746	-0.0247799
TIMP1	TIMP metallopeptidase inhibitor 1	coding	blue	0.0120955	0.894438	0.952969	-0.827101	0.849467	-0.130026	0.902149	0.866241	0.85269	0.851802	0.517208	0.940951	1.58571e-05	1.41134e-07	0.000262822	1.10784e-06	0.758934	0.00545391	0.00539876	0.00713466	5.56825e-05	0.0233432	0.999991	6.98163e-05	1.93233e-06	0.0139303	6.57372e-06	0.999965	0.0982526	0.0406353	0.0415942	0.00545845	0.0742766	40	14	14	14	21	8	7	8	8	15	19	2.43924	1.98072
SPACA6	sperm acrosome associated 6	coding	lightcyan	0.00621614	-0.290829	-0.817801	0.692114	-0.502916	0.463359	0.795502	0.878131	0.879305	0.851621	0.74569	0.969633	0.313094	0.000352277	0.00609114	0.0201378	0.247547	0.0324238	0.00412148	0.0040072	5.60993e-05	0.000247342	0.999991	0.370596	0.000943758	0.0484926	0.0305254	0.999965	0.132674	0.0343799	0.0304148	0.00545845	0.00311518	40	14	14	14	21	8	7	8	8	15	19	-0.519083	-0.346702
FBXO11	F-box protein 11	coding	blue	0.0419154	0.302489	0.404833	-0.0473086	0.327955	-0.184913	0.853379	0.982061	0.908219	0.851435	0.582519	0.797331	0.293179	0.151041	0.872411	0.146683	0.661111	0.0145866	1.42378e-05	0.00180222	5.65329e-05	0.00886673	0.999991	0.350204	0.196635	0.924464	0.184797	0.999965	0.0982526	0.00333402	0.0209724	0.00545845	0.0385027	40	14	14	14	21	8	7	8	8	15	19	0.126926	0.57252
UQCRB	ubiquinol-cytochrome c reductase binding protein	coding	grey	-0.0166767	-0.108492	-0.371314	0.390044	-0.253638	-0.425539	0.883512	0.972322	0.927705	0.851391	0.683971	0.91865	0.711988	0.191168	0.167989	0.267253	0.293204	0.00834652	5.19168e-05	0.000894167	5.66348e-05	0.00124059	0.999991	0.757581	0.242776	0.338305	0.317679	0.999965	0.0982526	0.00464352	0.0147994	0.00545845	0.00986002	40	14	14	14	21	8	7	8	8	15	19	0.52579	0.818651
KRIT1	KRIT1 ankyrin repeat containing	coding	blue	0.0152116	0.381078	0.552781	-0.347861	0.438463	0.579922	0.829808	0.850055	0.955029	0.851381	0.666537	0.925775	0.178844	0.0403517	0.222941	0.0467845	0.131841	0.0208936	0.00750886	0.000219774	5.6659e-05	0.00183062	0.999991	0.226382	0.0607581	0.40158	0.0656593	0.999965	0.105807	0.0492477	0.00803044	0.00545845	0.0130119	40	14	14	14	21	8	7	8	8	15	19	0.246297	0.475214
HAGHL	hydroxyacylglutathione hydrolase like	coding	yellow	-0.0100282	-0.857362	-0.945203	0.48244	-0.800416	0.26543	-0.853382	-0.957592	-0.853259	-0.851326	-0.52282	0.95103	8.878e-05	3.47108e-07	0.0806082	1.31767e-05	0.5252	0.0145856	0.000184654	0.0070555	5.67876e-05	0.021633	0.999991	0.000287557	3.76686e-06	0.213062	4.42782e-05	0.999965	0.0982526	0.00773163	0.041285	0.00545845	0.0706298	40	14	14	14	21	8	7	8	8	15	19	-1.45613	-1.82128
EFR3B	EFR3 homolog B	coding	blue	0.0127551	0.816189	0.792287	-0.0643324	0.796205	-0.0516527	0.906971	0.877772	0.939874	0.851284	0.686469	0.937736	0.000370016	0.000728951	0.827046	1.57858e-05	0.903323	0.00481957	0.00415687	0.000519197	5.68847e-05	0.00117087	0.999991	0.000955257	0.00175707	0.899303	5.15526e-05	0.999965	0.0982526	0.0346102	0.0118315	0.00545845	0.00945357	40	14	14	14	21	8	7	8	8	15	19	-0.919052	-1.13989
CEP85L	centrosomal protein 85 like	coding	blue	0.0297275	0.915435	0.924576	-0.362858	0.888385	0.716424	0.888156	0.950218	0.900923	0.851156	0.652884	0.855511	4.39131e-06	2.25575e-06	0.20227	7.57014e-08	0.0455725	0.00755889	0.00029703	0.00225434	5.71844e-05	0.00244146	0.999991	2.54483e-05	1.57243e-05	0.379875	1.55374e-06	0.999965	0.0982526	0.0096615	0.022813	0.00545845	0.015889	40	14	14	14	21	8	7	8	8	15	19	0.333779	0.659141
GLIS2	GLIS family zinc finger 2	coding	blue	0.0074662	0.807536	0.956197	-0.560059	0.827613	0.24863	0.850739	0.934732	0.896987	0.85106	0.568467	0.963531	0.00047797	9.27736e-08	0.0372613	3.66968e-06	0.552675	0.0152293	0.000661498	0.00252608	5.74119e-05	0.0110988	0.999991	0.00118508	1.40662e-06	0.132574	1.58575e-05	0.999965	0.0984424	0.0141534	0.0240634	0.00545845	0.0445872	40	14	14	14	21	8	7	8	8	15	19	0.0545199	0.129399
IER5	immediate early response 5	coding	blue	0.065048	0.855328	0.754615	0.795873	0.81971	0.94412	0.911868	0.953351	0.964352	0.850787	0.497187	0.690057	9.62057e-05	0.00181371	0.000662132	5.43669e-06	0.000418141	0.00422154	0.000244985	0.000110249	5.80583e-05	0.0303272	0.999991	0.000306892	0.00382302	0.0181653	2.13899e-05	0.279218	0.0982526	0.00885094	0.00615068	0.00547871	0.0891002	40	14	14	14	21	8	7	8	8	15	19	0.465321	0.88351
ANAPC11	anaphase promoting complex subunit 11	coding	yellow	-0.0277814	-0.811644	-0.873233	0.573602	-0.831916	-0.330389	-0.874567	-0.959533	-0.921508	-0.850212	-0.694778	0.86488	0.000423944	4.53456e-05	0.0319798	2.93818e-06	0.424125	0.00999214	0.000160678	0.00113891	5.94421e-05	0.000962074	0.999991	0.00107108	0.000170755	0.122268	1.33453e-05	0.999965	0.0982526	0.00721335	0.0165725	0.00556576	0.00820879	40	14	14	14	21	8	7	8	8	15	19	-0.0591374	-0.428609
VANGL1	VANGL planar cell polarity protein 1	coding	blue	0.0140827	0.357097	0.508501	-0.35957	0.437929	-0.181616	0.871472	0.98486	0.952332	0.849875	0.667305	0.93127	0.210061	0.0633474	0.206694	0.0470833	0.666884	0.0106015	8.57798e-06	0.000261187	6.02656e-05	0.00180045	0.999991	0.260977	0.0908092	0.384813	0.06602	0.999965	0.0982526	0.00330387	0.00869133	0.00556576	0.0128565	40	14	14	14	21	8	7	8	8	15	19	0.79524	0.71699
ZFAND5	zinc finger AN1-type containing 5	coding	tan	0.0210666	0.82034	0.466325	0.800975	0.649318	-0.236515	-0.857793	-0.949608	-0.975598	-0.849731	-0.583991	0.897337	0.000325732	0.092804	0.000575627	0.00144683	0.572795	0.013547	0.000307947	3.56655e-05	6.06205e-05	0.0086557	0.999991	0.000859205	0.127527	0.0176756	0.00278763	0.999965	0.0982526	0.0097839	0.00464939	0.00556576	0.0379734	40	14	14	14	21	8	7	8	8	15	19	1.11285	1.55604
TGM2	transglutaminase 2	coding	blue	0.0107944	0.948323	0.931743	0.153242	0.862794	-0.0872341	0.876942	0.948387	0.924121	0.849682	0.527782	0.947293	2.45847e-07	1.25885e-06	0.600955	4.84957e-07	0.837264	0.00953854	0.000330561	0.00103098	6.07414e-05	0.0202049	0.999991	2.83903e-06	9.88705e-06	0.74527	3.90071e-06	0.999965	0.0982526	0.0100479	0.0157063	0.00556576	0.0673765	40	14	14	14	21	8	7	8	8	15	19	3.44038	3.20637
MGAT4A	alpha-1,3-mannosyl-glycoprotein 4-beta-N-acetylglucosaminyltransferase A	coding	blue	0.0124035	0.496727	0.548874	-0.0111323	0.482761	0.516811	0.89409	0.949219	0.958544	0.848593	0.587028	0.939449	0.0707809	0.0420865	0.969871	0.0266463	0.189699	0.0066176	0.000315037	0.000172621	6.34833e-05	0.00823305	0.999991	0.0991058	0.0631223	0.983009	0.0393257	0.999965	0.0982526	0.00978601	0.00752687	0.00559703	0.0366233	40	14	14	14	21	8	7	8	8	15	19	0.982436	1.10341
CARD19	caspase recruitment domain family member 19	coding	yellow	-0.00626951	-0.608954	-0.899286	0.767411	-0.698258	0.363409	-0.839774	-0.933997	-0.960677	-0.848471	-0.754937	0.969373	0.0208131	1.20893e-05	0.00135563	0.000431242	0.376224	0.0180699	0.000683711	0.000147564	6.37975e-05	0.000186887	0.999991	0.0329266	5.92789e-05	0.0229739	0.000934317	0.999965	0.101553	0.0143375	0.00711689	0.00559703	0.00256515	40	14	14	14	21	8	7	8	8	15	19	0.10151	-0.0324372
MEGF9	multiple EGF like domains 9	coding	yellow	0.0740329	0.00928548	-0.0367518	0.272888	-0.0504504	0.675919	-0.8417	-0.872711	-0.877725	-0.848178	-0.74326	0.649828	0.974868	0.900735	0.345198	0.828073	0.0657521	0.0175509	0.00467629	0.00416148	6.45547e-05	0.000265735	0.999991	0.978971	0.919051	0.526669	0.855682	0.999965	0.100969	0.0372366	0.031049	0.00559703	0.0032911	40	14	14	14	21	8	7	8	8	15	19	-0.0591374	0.0537443
PCGF2	polycomb group ring finger 2	coding	blue	0.011621	0.563333	0.646105	-0.330304	0.603132	-0.182714	0.875872	0.929228	0.957936	0.848161	0.806902	0.943263	0.0359292	0.0125473	0.248746	0.00379978	0.664959	0.00974133	0.000839815	0.000180252	6.46e-05	2.98539e-05	0.999991	0.0539899	0.021272	0.42964	0.0067144	0.999965	0.0982526	0.0158263	0.00759529	0.00559703	0.00074458	40	14	14	14	21	8	7	8	8	15	19	0.629337	0.674117
GJA1	gap junction protein alpha 1	coding	tan	-0.00208947	0.696621	0.662786	0.181555	0.665443	-0.259638	-0.886371	-0.967482	-0.966301	-0.847823	-0.780908	0.989791	0.00563673	0.00978665	0.534483	0.000994409	0.534615	0.00785622	8.38834e-05	9.32729e-05	6.5484e-05	7.94064e-05	0.999991	0.0101736	0.0170598	0.69234	0.00198772	0.999965	0.0982526	0.00507663	0.00591777	0.00559703	0.00146475	40	14	14	14	21	8	7	8	8	15	19	2.09231	2.18683
VASH1	vasohibin 1	coding	orange	0.011332	-0.152802	-0.459689	0.311339	-0.290778	-0.0539878	-0.843196	-0.96533	-0.974774	-0.847712	-0.484722	0.944672	0.602013	0.0981806	0.278572	0.200979	0.898969	0.0171536	0.000101492	3.93739e-05	6.57772e-05	0.0354357	0.999991	0.657268	0.134215	0.460402	0.246091	0.999965	0.100142	0.00553176	0.0046586	0.00559703	0.0993316	40	14	14	14	21	8	7	8	8	15	19	1.29309	0.664173
STXBP3	syntaxin binding protein 3	coding	blue	0.0159757	0.443715	0.422231	-0.0972992	0.43632	-0.350203	0.871814	0.956229	0.973004	0.84769	0.624271	0.922058	0.111998	0.1326	0.740717	0.0479943	0.395081	0.0105332	0.000202832	4.81966e-05	6.58343e-05	0.00427772	0.999991	0.149674	0.175353	0.842887	0.0672154	0.999965	0.0982526	0.00816818	0.00477977	0.00559703	0.0230668	40	14	14	14	21	8	7	8	8	15	19	0.17499	0.533556
SRSF8	serine and arginine rich splicing factor 8	coding	blue	0.0276229	0.815021	0.728	0.362128	0.800068	-0.0414938	0.907055	0.903826	0.894915	0.847671	0.608507	0.865644	0.000383315	0.0031577	0.203246	1.3377e-05	0.922288	0.00480894	0.00206654	0.00267726	6.58847e-05	0.00569837	0.999991	0.000984567	0.00618194	0.380958	4.48919e-05	0.999965	0.0982526	0.0244076	0.0246989	0.00559703	0.0282905	40	14	14	14	21	8	7	8	8	15	19	0.37778	0.633348
VPS11	VPS11 core subunit of CORVET and HOPS complexes	coding	lightcyan	0.00587621	0.148964	-0.00207333	0.119185	0.0696851	-0.398043	0.923577	0.951863	0.876985	0.847498	0.707874	0.971293	0.611274	0.994387	0.684871	0.764064	0.328754	0.0029751	0.000268883	0.0042351	6.63431e-05	0.000696703	0.999991	0.666054	0.995017	0.805825	0.800193	0.999965	0.0982526	0.00928539	0.0312444	0.00559703	0.00655005	40	14	14	14	21	8	7	8	8	15	19	0.472731	0.425711
PDE4B	phosphodiesterase 4B	coding	tan	0.00409013	0.887967	0.899886	0.337012	0.871351	-0.976227	-0.854423	-0.980246	-0.936068	-0.847462	-0.457433	0.980017	2.23336e-05	1.16795e-05	0.238682	2.72366e-07	3.29911e-05	0.0143366	1.89875e-05	0.000622356	6.64397e-05	0.0489311	0.999991	9.19086e-05	5.77131e-05	0.418661	2.7528e-06	0.0834344	0.0982526	0.00364153	0.0126402	0.00559703	0.124795	40	14	14	14	21	8	7	8	8	15	19	1.57729	2.25522
SEC11C	SEC11 homolog C, signal peptidase complex subunit	coding	blue	-0.0189222	0.0865613	0.732512	-0.706996	0.405029	0.373897	0.835382	0.969711	0.970086	0.847273	0.466272	0.90774	0.768576	0.00288718	0.004691	0.068548	0.361541	0.0192856	6.79032e-05	6.54305e-05	6.69452e-05	0.0441908	0.999991	0.806326	0.00571597	0.0420426	0.0929135	0.999965	0.103087	0.00484878	0.00537252	0.00559703	0.115836	40	14	14	14	21	8	7	8	8	15	19	-0.384107	-0.132556
CAP1	cyclase associated actin cytoskeleton regulatory protein 1	coding	brown	-0.0162586	-0.867065	-0.779883	-0.879711	-0.822263	0.24441	-0.870771	-0.947811	-0.895651	-0.847195	-0.68325	0.920683	5.94678e-05	0.00100287	3.35884e-05	4.79827e-06	0.559654	0.0107425	0.000341608	0.00262289	6.71541e-05	0.00126136	0.999991	0.000204952	0.00230653	0.0097353	1.93544e-05	0.999965	0.0982526	0.0102848	0.024441	0.00559703	0.00999365	40	14	14	14	21	8	7	8	8	15	19	1.0945	0.907667
ST6GALNAC1	ST6 N-acetylgalactosaminide alpha-2,6-sialyltransferase 1	coding	blue	0.00476603	0.893339	0.975579	-0.819481	0.851282	-0.334719	0.91101	0.957656	0.923124	0.847165	0.567049	0.976715	1.6832e-05	2.90559e-09	0.000334526	9.94654e-07	0.417703	0.00432292	0.000183828	0.00107136	6.72342e-05	0.0113472	0.999991	7.31412e-05	1.2937e-07	0.0149624	6.1197e-06	0.999965	0.0982526	0.00773163	0.0160324	0.00559703	0.0452492	40	14	14	14	21	8	7	8	8	15	19	0.786154	0.939015
COPA	COPI coat complex subunit alpha	coding	yellow	-0.0246899	-0.721823	-0.812971	0.174402	-0.71051	-0.819751	-0.850365	-0.90916	-0.926029	-0.847148	-0.51036	0.879799	0.00356006	0.000407586	0.550965	0.000306907	0.0127328	0.0153217	0.00174866	0.000956546	6.72794e-05	0.0255721	0.999991	0.00674918	0.00106886	0.706803	0.000690049	0.838574	0.0984578	0.0224433	0.0151088	0.00559703	0.0791383	40	14	14	14	21	8	7	8	8	15	19	1.67001	1.57479
WNK1	WNK lysine deficient protein kinase 1	coding	blue	0.0736297	0.720688	0.745692	-0.309366	0.557366	-0.465148	0.692895	0.982778	0.904734	0.846547	0.564872	0.651613	0.00363817	0.00220015	0.28179	0.00866531	0.245482	0.0843738	1.2605e-05	0.00201002	6.89133e-05	0.011737	0.999991	0.00687561	0.00451274	0.463463	0.0141805	0.999965	0.243614	0.00330387	0.0218357	0.00569548	0.0463505	40	14	14	14	21	8	7	8	8	15	19	2.092	1.80901
ZNF326	zinc finger protein 326	coding	blue	0.0285412	0.630779	0.501153	0.155728	0.511768	0.342892	0.891358	0.895863	0.880222	0.845768	0.647636	0.861219	0.0155761	0.0679169	0.594991	0.0177157	0.405694	0.00704188	0.00260737	0.00391937	7.10773e-05	0.00271725	0.999991	0.025388	0.0964196	0.741268	0.0271401	0.999965	0.0982526	0.0272565	0.0301112	0.00576164	0.017137	40	14	14	14	21	8	7	8	8	15	19	0.0475243	0.371912
PLCD3	phospholipase C delta 3	coding	blue	0.0174855	0.890298	0.862763	0.101778	0.829977	0.0515723	0.846261	0.979547	0.939153	0.845613	0.536062	0.914718	1.97891e-05	7.12931e-05	0.729183	3.25022e-06	0.903473	0.0163559	2.10617e-05	0.000537792	7.15146e-05	0.0179889	0.999991	8.35502e-05	0.00024848	0.835797	1.43826e-05	0.999965	0.0989261	0.00364605	0.0120252	0.00576164	0.0623547	40	14	14	14	21	8	7	8	8	15	19	0.980737	0.721576
PALM	paralemmin	coding	blue	0.0201625	0.757763	0.757456	-0.120282	0.735093	-0.195594	0.779748	0.961931	0.914457	0.845613	0.578406	0.901721	0.00169106	0.00170273	0.68211	0.00014698	0.642508	0.0386802	0.000134016	0.00146624	7.15152e-05	0.00947853	0.999991	0.00351818	0.00361501	0.80419	0.000357924	0.999965	0.147723	0.00659665	0.0190355	0.00576164	0.0401125	40	14	14	14	21	8	7	8	8	15	19	0.843085	1.07306
ABR	ABR activator of RhoGEF and GTPase	coding	blue	0.0206109	0.803689	0.898719	-0.476585	0.784739	-0.154627	0.912568	0.917567	0.8846	0.845428	0.530894	0.899546	0.000533451	1.24878e-05	0.0849008	2.53005e-05	0.714663	0.00413974	0.00131521	0.00351715	7.20406e-05	0.0193481	0.999991	0.00130171	6.08042e-05	0.219653	7.6739e-05	0.999965	0.0982526	0.0194741	0.0282916	0.00576164	0.0654513	40	14	14	14	21	8	7	8	8	15	19	1.55137	1.22212
RGS3	regulator of G protein signaling 3	coding	tan	-0.0121251	0.81427	0.596433	0.51813	0.64907	0.578361	-0.888316	-0.879759	-0.94214	-0.845379	-0.711015	0.940806	0.000392066	0.0243626	0.057698	0.00145497	0.133134	0.00753256	0.00396362	0.000463489	7.21798e-05	0.000643177	0.999991	0.00100398	0.0384744	0.173294	0.00280075	0.999965	0.0982526	0.0336828	0.0112925	0.00576164	0.00620818	40	14	14	14	21	8	7	8	8	15	19	1.81978	1.4534
SLCO4A1	solute carrier organic anion transporter family member 4A1	coding	blue	0.00426202	-0.109365	0.471057	-0.721804	0.112413	-0.0508575	0.861569	0.942365	0.967644	0.845152	0.77684	0.979177	0.709764	0.0890978	0.00356134	0.627577	0.904806	0.0126924	0.000458171	8.26421e-05	7.28286e-05	9.14649e-05	0.999991	0.755787	0.123043	0.0365299	0.676704	0.999965	0.0982526	0.0118965	0.00582321	0.00576164	0.0016019	40	14	14	14	21	8	7	8	8	15	19	0.151397	-0.359624
BASP1	brain abundant membrane attached signal protein 1	coding	yellow	-0.0560495	-0.739341	-0.772638	-0.017707	-0.405679	-0.128932	-0.883651	-0.939849	-0.939758	-0.845126	-0.610919	0.731209	0.0025128	0.00119742	0.952092	0.0680624	0.760919	0.00832226	0.000519843	0.000522171	7.29033e-05	0.00545893	0.999991	0.00496576	0.00267611	0.973179	0.0923543	0.999965	0.0982526	0.0125928	0.0118543	0.00576164	0.0274219	40	14	14	14	21	8	7	8	8	15	19	0.0884231	0.129399
HIP1	huntingtin interacting protein 1	coding	blue	0.0103875	0.920006	0.905605	-0.059886	0.883603	-0.410632	0.919607	0.983459	0.884646	0.844688	0.801822	0.949277	3.17827e-06	8.31145e-06	0.838852	1.10611e-07	0.312237	0.00336922	1.1174e-05	0.00351311	7.41716e-05	3.6545e-05	0.999991	1.97879e-05	4.41053e-05	0.905753	1.74935e-06	0.999965	0.0982526	0.00330387	0.0282856	0.00579982	0.000851794	40	14	14	14	21	8	7	8	8	15	19	1.28135	1.23423
CXADR	CXADR Ig-like cell adhesion molecule	coding	yellow	-0.00311711	-0.721365	-0.954003	0.787324	-0.763702	-0.0702723	-0.852226	-0.908478	-0.880268	-0.844643	-0.669186	0.98477	0.00359144	1.23789e-07	0.00083023	5.6112e-05	0.868673	0.0148652	0.00178738	0.00391503	7.43037e-05	0.00172829	0.999991	0.00679745	1.75401e-06	0.0192671	0.000153016	0.999965	0.0982526	0.0227036	0.0301112	0.00579982	0.0124953	40	14	14	14	21	8	7	8	8	15	19	-3.39233	-2.50267
GLUD1	glutamate dehydrogenase 1	coding	blue	-0.00721842	0.286058	0.609677	-0.475925	0.408258	0.0568146	0.867949	0.850996	0.907624	0.844485	0.568639	0.96474	0.321459	0.0206209	0.0853942	0.0661631	0.893702	0.0113208	0.00737384	0.00183669	7.47668e-05	0.011069	0.999991	0.379143	0.033107	0.220504	0.0900185	0.999965	0.0982526	0.0487924	0.021146	0.00580016	0.0444905	40	14	14	14	21	8	7	8	8	15	19	1.21689	1.23623
AAR2	AAR2 splicing factor	coding	brown	-0.0254714	-0.130257	0.225097	-0.348851	0.0534388	0.175754	-0.875751	-0.909314	-0.97856	-0.844251	-0.542284	0.876024	0.657161	0.439096	0.221537	0.818048	0.677184	0.00976446	0.00173999	2.42449e-05	7.54546e-05	0.0164543	0.999991	0.708107	0.500497	0.400133	0.847748	0.999965	0.0982526	0.0224283	0.00402794	0.00581783	0.0585532	40	14	14	14	21	8	7	8	8	15	19	0.369213	0.312999
TMEM38A	transmembrane protein 38A	coding	blue	0.0156356	0.805281	0.862239	-0.272825	0.832009	-0.33144	0.872599	0.951901	0.968467	0.843923	0.672346	0.923712	0.000509896	7.28572e-05	0.345314	2.92395e-06	0.422561	0.0103772	0.000268249	7.65446e-05	7.64306e-05	0.0016125	0.999991	0.00125514	0.000252682	0.526782	1.32902e-05	0.999965	0.0982526	0.00928539	0.00570677	0.0058276	0.0118962	40	14	14	14	21	8	7	8	8	15	19	-0.667901	-0.506239
FOXP1	forkhead box P1	coding	blue	0.0253929	0.958408	0.963878	-0.403975	0.88282	0.108947	0.885804	0.936986	0.876539	0.843868	0.590132	0.876402	6.83166e-08	2.96683e-08	0.151992	1.17514e-07	0.797335	0.0079521	0.000596344	0.00427977	7.6595e-05	0.00781865	0.999991	1.12629e-06	6.24178e-07	0.316875	1.79575e-06	0.999965	0.0982526	0.0134177	0.0314455	0.0058276	0.0353348	40	14	14	14	21	8	7	8	8	15	19	2.03736	2.04803
LUZP1	leucine zipper protein 1	coding	red	0.00499469	-0.649363	-0.335061	-0.502133	-0.47192	-0.225937	0.880251	0.94338	0.899185	0.843745	0.586261	0.975598	0.0119661	0.241583	0.0672943	0.0307796	0.590564	0.00892661	0.000434733	0.00237184	7.6964e-05	0.00833817	0.999991	0.0200227	0.297886	0.190788	0.044881	0.999965	0.0982526	0.0116466	0.0231339	0.0058276	0.0369762	40	14	14	14	21	8	7	8	8	15	19	1.29097	1.33376
SPTBN1	spectrin beta, non-erythrocytic 1	coding	blue	0.00908766	0.849321	0.80467	0.195776	0.829882	-0.665281	0.874244	0.951675	0.86134	0.843508	0.769903	0.955617	0.000121138	0.000518845	0.502368	3.2662e-06	0.071792	0.0100548	0.000272	0.005991	7.76802e-05	0.000115639	0.999991	0.000370722	0.00131321	0.666364	1.44359e-05	0.999965	0.0982526	0.00934631	0.0377212	0.00584683	0.00186038	40	14	14	14	21	8	7	8	8	15	19	2.83806	2.67556
CYTOR	cytoskeleton regulator RNA	noncoding	yellow	-0.0125728	-0.929551	-0.971703	0.620491	-0.84039	-0.589811	-0.868356	-0.9793	-0.904565	-0.84323	-0.537513	0.938624	1.5145e-06	6.97355e-09	0.0179017	1.86135e-06	0.123815	0.0112363	2.18323e-05	0.00202047	7.85266e-05	0.0176211	0.999991	1.09496e-05	2.32054e-07	0.0888062	9.5121e-06	0.999965	0.0982526	0.00364605	0.021897	0.00586024	0.0614643	40	14	14	14	21	8	7	8	8	15	19	-0.470946	-0.721579
TDRP	testis development related protein	coding	blue	-0.0378435	0.153148	0.191799	-0.0537047	0.169958	0.210452	0.864068	0.933421	0.957328	0.843101	0.728032	0.816665	0.601182	0.511258	0.855316	0.461404	0.616899	0.0121444	0.00070147	0.000188093	7.89208e-05	0.000409536	0.999991	0.656472	0.571494	0.914234	0.517056	0.999965	0.0982526	0.0145411	0.00759529	0.00586024	0.00445278	40	14	14	14	21	8	7	8	8	15	19	-1.17807	-0.199415
KLF8	Kruppel like factor 8	coding	blue	-0.00208822	0.832371	0.936848	-0.866095	0.753436	0.127589	0.861859	0.972611	0.9356	0.842653	0.52936	0.989797	0.000220928	7.9852e-07	6.19842e-05	8.04375e-05	0.763355	0.0126282	5.03155e-05	0.00063589	8.03054e-05	0.0197667	0.999991	0.000614257	7.08581e-06	0.0107201	0.000209329	0.999965	0.0982526	0.00464352	0.012743	0.00586024	0.0663348	40	14	14	14	21	8	7	8	8	15	19	-0.110738	0.46838
SLK	STE20 like kinase	coding	blue	-0.0123807	0.423303	0.602843	-0.376283	0.49987	-0.647439	0.518443	0.958151	0.947219	0.842628	0.460194	0.939561	0.131516	0.022493	0.184831	0.0210304	0.0826314	0.233212	0.000177533	0.000353203	8.03845e-05	0.0474105	0.999991	0.17262	0.0358127	0.358189	0.0317413	0.999965	0.465427	0.00766177	0.00991926	0.00586024	0.122049	40	14	14	14	21	8	7	8	8	15	19	0.966983	1.30053
UBN1	ubinuclein 1	coding	red	-0.0140569	-0.654297	-0.739714	0.398235	-0.724893	0.0416177	0.884638	0.963489	0.9304	0.842574	0.462243	0.931396	0.0111257	0.00249352	0.158457	0.000201348	0.922057	0.0081513	0.000118368	0.000799488	8.05516e-05	0.0463058	0.999991	0.0187429	0.0050264	0.325908	0.000473507	0.999965	0.0982526	0.00618496	0.0143398	0.00586024	0.11984	40	14	14	14	21	8	7	8	8	15	19	1.165	0.902569
MAP1S	microtubule associated protein 1S	coding	yellow	-0.0115612	-0.889662	-0.91178	0.198369	-0.856885	0.323997	-0.850388	-0.93443	-0.923056	-0.842526	-0.763282	0.943554	2.04581e-05	5.61486e-06	0.496609	7.06608e-07	0.433681	0.0153159	0.000670565	0.00107415	8.07022e-05	0.000143606	0.999991	8.57302e-05	3.21945e-05	0.661519	4.89861e-06	0.999965	0.0984578	0.0142132	0.0160376	0.00586024	0.00216694	40	14	14	14	21	8	7	8	8	15	19	0.286621	-0.123567
SCARF2	scavenger receptor class F member 2	coding	orange	0.0142224	0.331432	-0.253196	0.528462	0.0416578	0.136672	-0.871481	-0.90796	-0.90316	-0.842274	-0.702454	0.93059	0.247036	0.382442	0.05205	0.857712	0.746913	0.0105999	0.00181719	0.00210868	8.14928e-05	0.000797871	0.999991	0.301134	0.444238	0.162954	0.88041	0.999965	0.0982526	0.0228869	0.022372	0.00586024	0.00718084	40	14	14	14	21	8	7	8	8	15	19	-0.176551	-0.209583
FGD6	FYVE, RhoGEF and PH domain containing 6	coding	blue	-0.00206034	0.758294	0.68146	0.394958	0.682614	0.637926	0.893591	0.939089	0.946877	0.842243	0.839238	0.989933	0.00167103	0.00727898	0.162226	0.000650597	0.0887763	0.00669402	0.000539474	0.000360023	8.15892e-05	7.06738e-06	0.999991	0.00348312	0.0130613	0.330976	0.00135176	0.999965	0.0982526	0.0128245	0.0100275	0.00586024	0.000283705	40	14	14	14	21	8	7	8	8	15	19	0.574886	0.630709
MEF2A	myocyte enhancer factor 2A	coding	blue	0.0171057	0.925441	0.949667	-0.495761	0.858971	0.653676	0.911752	0.935676	0.964225	0.842104	0.631366	0.916564	2.10904e-06	2.10534e-07	0.0714167	6.19873e-07	0.0787404	0.00423514	0.000633674	0.000111414	8.20295e-05	0.00374113	0.999991	1.42233e-05	2.58717e-06	0.197564	4.57415e-06	0.999965	0.0982526	0.0138405	0.00615072	0.00586024	0.0211757	40	14	14	14	21	8	7	8	8	15	19	1.231	1.51547
CCM2L	CCM2 like scaffold protein	coding	blue	0.0164021	0.940547	0.927133	0.0100473	0.90434	0.0408367	0.856364	0.979785	0.955465	0.841934	0.60797	0.919985	5.60478e-07	1.84451e-06	0.972806	1.86439e-08	0.923516	0.0138788	2.03403e-05	0.000213517	8.25713e-05	0.00575275	0.999991	5.11345e-06	1.34742e-05	0.984321	1.19401e-06	0.999965	0.0982526	0.00364153	0.00795806	0.00586581	0.028471	40	14	14	14	21	8	7	8	8	15	19	0.356148	0.338935
ZBTB40	zinc finger and BTB domain containing 40	coding	lightcyan	-0.00471886	-0.316677	-0.64015	0.441992	-0.445514	0.878227	0.820783	0.958336	0.900285	0.841482	0.364272	0.976946	0.269973	0.013665	0.113564	0.0429689	0.00411206	0.0236526	0.000175204	0.002297	8.40201e-05	0.125209	0.999991	0.325558	0.0229474	0.264264	0.0608105	0.536248	0.111585	0.0075883	0.0229428	0.00593539	0.246231	40	14	14	14	21	8	7	8	8	15	19	0.743639	0.436657
LINC00704			yellow	-0.0269167	-0.964326	-0.982898	0.774216	-0.855724	0.147385	-0.862897	-0.927886	-0.967213	-0.841322	-0.772249	0.869048	2.75534e-08	3.48125e-10	0.0011527	7.5937e-07	0.727628	0.0123995	0.00088759	8.59616e-05	8.45378e-05	0.00010692	0.999991	5.86552e-07	2.91526e-08	0.0212711	5.1294e-06	0.999965	0.0982526	0.0162661	0.00584952	0.00593878	0.00176271	40	14	14	14	21	8	7	8	8	15	19	-2.11274	-2.18585
SOX18	SRY-box transcription factor 18	coding	yellow	-0.0102071	-0.05226	-0.178757	0.12373	-0.0921197	0.363655	-0.86003	-0.868116	-0.943663	-0.83995	-0.62195	0.950157	0.859172	0.540905	0.673451	0.691262	0.375876	0.0130369	0.00518244	0.000428335	8.90921e-05	0.0044664	0.999991	0.88399	0.599296	0.798255	0.734971	0.999965	0.0982526	0.0395247	0.0107894	0.00622414	0.0237322	40	14	14	14	21	8	7	8	8	15	19	0.923907	0.748401
SOCS5	suppressor of cytokine signaling 5	coding	blue	0.0108518	0.945364	0.942412	0.0931349	0.890296	0.10542	0.841748	0.956114	0.961182	0.839798	0.534779	0.947013	3.41175e-07	4.64813e-07	0.751488	6.47454e-08	0.803797	0.0175379	0.000204412	0.000142012	8.96093e-05	0.018319	0.999991	3.55953e-06	4.6771e-06	0.85	1.49166e-06	0.999965	0.100941	0.00818202	0.0070421	0.00622588	0.0630837	40	14	14	14	21	8	7	8	8	15	19	0.351734	0.508301
ASB1	ankyrin repeat and SOCS box containing 1	coding	yellow	-0.0607037	-0.880275	-0.917657	0.617681	-0.838345	0.395539	-0.888126	-0.93566	-0.945603	-0.839253	-0.608778	0.709824	3.26951e-05	3.76154e-06	0.0185805	2.0831e-06	0.332087	0.00756376	0.000634137	0.000386163	9.14815e-05	0.00567098	0.999991	0.00012532	2.3664e-05	0.0904351	1.03592e-05	0.999965	0.0982526	0.0138405	0.0103018	0.00628628	0.0281767	40	14	14	14	21	8	7	8	8	15	19	-0.950371	-2.50267
C2orf27A	chromosome 2 open reading frame 27A	noncoding	cyan	-0.00532353	-0.409679	-0.864749	0.784121	-0.608711	-0.067235	-0.861552	-0.931368	-0.929331	-0.839224	-0.389543	0.973992	0.145743	6.56168e-05	0.000901353	0.00340769	0.874314	0.0126962	0.000767166	0.000836228	9.15849e-05	0.0992334	0.999991	0.188825	0.000232823	0.0199171	0.0060879	0.999965	0.0982526	0.0151958	0.0145944	0.00628628	0.207658	40	14	14	14	21	8	7	8	8	15	19	-2.66991	-1.82128
TROVE2			blue	0.0090447	0.433367	0.483954	-0.193696	0.432745	0.324848	0.823211	0.960827	0.915398	0.838977	0.701408	0.955827	0.121627	0.0795238	0.50701	0.0500661	0.432403	0.0228914	0.000145905	0.00141943	9.2442e-05	0.000818761	0.999991	0.161045	0.111003	0.670481	0.0698925	0.999965	0.110145	0.0068332	0.0186577	0.00628628	0.0073116	40	14	14	14	21	8	7	8	8	15	19	0.748501	1.25294
CHST14	carbohydrate sulfotransferase 14	coding	yellow	-0.0179271	-0.818014	-0.874701	0.675937	-0.831051	-0.183174	-0.848973	-0.909247	-0.95829	-0.83897	-0.663205	0.912573	0.00034998	4.24243e-05	0.00796159	3.07406e-06	0.664154	0.0156681	0.00174376	0.000175788	9.24673e-05	0.00196645	0.999991	0.000911722	0.000161473	0.0564588	1.38382e-05	0.999965	0.0984578	0.0224311	0.0075612	0.00628628	0.01367	40	14	14	14	21	8	7	8	8	15	19	0.281713	-0.0640479
PTHLH	parathyroid hormone like hormone	coding	blue	0.0195707	0.650691	0.727189	-0.205341	0.709058	-0.0267721	0.846801	0.928142	0.967005	0.838704	0.707202	0.904592	0.0117352	0.00320842	0.481281	0.000319813	0.949826	0.0162177	0.000878343	8.75979e-05	9.34023e-05	0.00070862	0.999991	0.0196848	0.00627153	0.648668	0.000716138	0.999965	0.0987353	0.0161963	0.00584952	0.00629008	0.00663379	40	14	14	14	21	8	7	8	8	15	19	0.139276	0.0927243
APBA2	amyloid beta precursor protein binding family A member 2	coding	yellow	-0.00837726	-0.692698	-0.868025	0.788813	-0.746905	-0.097534	-0.876623	-0.954863	-0.943439	-0.838671	-0.683456	0.959084	0.00603068	5.70612e-05	0.000798723	0.000100265	0.81828	0.0095988	0.00022218	0.000433388	9.35179e-05	0.00125539	0.999991	0.0108106	0.000207041	0.0192411	0.000254079	0.999965	0.0982526	0.00848742	0.0108519	0.00629008	0.00995709	40	14	14	14	21	8	7	8	8	15	19	-1.81553	-1.97716
PPP1R14A	protein phosphatase 1 regulatory inhibitor subunit 14A	coding	blue	0.00355592	0.911098	0.972841	-0.149608	0.868245	-0.347012	0.562619	0.920262	0.913839	0.83837	0.576494	0.982626	5.87158e-06	5.46522e-09	0.609714	3.37364e-07	0.399699	0.18856	0.00119289	0.00149752	9.45866e-05	0.00977433	0.999991	3.18312e-05	1.93329e-07	0.752399	3.14042e-06	0.999965	0.40875	0.0186454	0.0191856	0.00630543	0.0409802	40	14	14	14	21	8	7	8	8	15	19	-0.28371	-0.400088
CENPJ	centromere protein J	coding	brown	-0.0140382	-0.966948	-0.929765	-0.565737	-0.855256	-0.694274	-0.734997	-0.88091	-0.915142	-0.838324	-0.688414	0.931487	1.75287e-08	1.48775e-06	0.034974	7.81591e-07	0.0560601	0.0598365	0.00385434	0.00143206	9.47511e-05	0.00111888	0.999991	4.22192e-07	1.13329e-05	0.128001	5.22369e-06	0.999965	0.195361	0.0333066	0.0187573	0.00630543	0.00916733	40	14	14	14	21	8	7	8	8	15	19	-0.589291	-0.655063
ADAMTSL4	ADAMTS like 4	coding	blue	0.0218401	0.914412	0.900448	0.303644	0.85109	-0.076808	0.86388	0.907143	0.932508	0.838186	0.689421	0.893589	4.70926e-06	1.13059e-05	0.291249	1.00608e-06	0.85655	0.0121851	0.00186481	0.000730201	9.52421e-05	0.00109275	0.999991	2.68964e-05	5.63729e-05	0.473016	6.15937e-06	0.999965	0.0982526	0.0232779	0.0136994	0.00630543	0.00903124	40	14	14	14	21	8	7	8	8	15	19	0.867785	0.710047
ZBED1	zinc finger BED-type containing 1	coding	orange	-0.0174674	-0.256203	-0.674403	0.676258	-0.441386	-0.0712242	-0.887929	-0.899168	-0.913401	-0.83795	-0.634304	0.914806	0.376621	0.00815965	0.00792061	0.045172	0.866906	0.00759629	0.002373	0.00151997	9.60907e-05	0.00353585	0.999991	0.437155	0.0144772	0.0564588	0.0635867	0.999965	0.0982526	0.0260023	0.0193566	0.00632847	0.0205567	40	14	14	14	21	8	7	8	8	15	19	0.660521	0.387765
SYNJ1	synaptojanin 1	coding	blue	0.0159974	0.586112	0.746869	-0.796492	0.641996	-0.248906	0.90708	0.947013	0.967133	0.837592	0.681396	0.921952	0.0276152	0.00214574	0.000651111	0.00170356	0.552219	0.00480571	0.000357287	8.65907e-05	9.73934e-05	0.00131609	0.999991	0.0425587	0.00442103	0.0181653	0.00323253	0.999965	0.0982526	0.0105558	0.00584952	0.00638104	0.010311	40	14	14	14	21	8	7	8	8	15	19	0.208864	0.461469
DACH1	dachshund family transcription factor 1	coding	yellow	0.00724675	0.0193927	-0.187485	0.316802	-0.0702349	-0.0582277	-0.882571	-0.894271	-0.93043	-0.837198	-0.616114	0.964602	0.947536	0.520982	0.269773	0.762254	0.89107	0.00851156	0.00272545	0.000798479	9.88395e-05	0.00497111	0.999991	0.956767	0.580731	0.450393	0.798369	0.999965	0.0982526	0.0278488	0.0143398	0.00638738	0.0256152	40	14	14	14	21	8	7	8	8	15	19	-0.781558	0.271939
EMP3	epithelial membrane protein 3	coding	blue	0.0417267	0.229061	0.631112	-0.638933	0.295287	0.0178948	0.865825	0.93198	0.964598	0.837168	0.501894	0.798225	0.430861	0.0155048	0.0139025	0.193765	0.966454	0.0117675	0.000747177	0.000108	9.89508e-05	0.0285551	0.999991	0.491674	0.0256913	0.0765001	0.238064	0.999965	0.0982526	0.0149258	0.00615068	0.00638738	0.085584	40	14	14	14	21	8	7	8	8	15	19	1.09307	0.826417
HACD2	3-hydroxyacyl-CoA dehydratase 2	coding	darkgreen	0.00666292	-0.714541	-0.242482	-0.708876	-0.459992	0.178367	0.8567	0.833057	0.933689	0.837153	0.564805	0.967452	0.00408496	0.403567	0.00453379	0.0358935	0.672588	0.0138002	0.0102241	0.000693181	9.90056e-05	0.0117493	0.999991	0.00763101	0.464806	0.0411656	0.0516469	0.999965	0.0982526	0.0590665	0.0132807	0.00638738	0.0463845	40	14	14	14	21	8	7	8	8	15	19	0.186476	0.399395
RAB27A	RAB27A, member RAS oncogene family	coding	blue	0.0132651	0.650397	0.906419	-0.72687	0.726065	-0.167112	0.868427	0.887956	0.896181	0.836927	0.588824	0.935252	0.011786	7.90497e-06	0.00322851	0.000194332	0.692449	0.0112216	0.00322755	0.00258418	9.98455e-05	0.00799119	0.999991	0.0197501	4.24632e-05	0.0345385	0.000458949	0.999965	0.0982526	0.0306098	0.0242771	0.00640886	0.0358965	40	14	14	14	21	8	7	8	8	15	19	0.251475	0.67903
SH3BP4	SH3 domain binding protein 4	coding	tan	0.0093225	0.591004	0.737647	-0.46091	0.610014	-0.197868	-0.84384	-0.916907	-0.857821	-0.836573	-0.537545	0.954472	0.0260355	0.00260187	0.0971754	0.00332116	0.638568	0.0169842	0.00134637	0.00644087	0.000101172	0.0176131	0.999991	0.0403158	0.0052215	0.239342	0.00594929	0.999965	0.0997795	0.0196365	0.0390435	0.00643014	0.0614643	40	14	14	14	21	8	7	8	8	15	19	1.28991	1.36852
PLS1	plastin 1	coding	darkgreen	0.00156509	-0.348341	-0.429268	0.122714	-0.381432	0.285521	0.883317	0.89346	0.890391	0.836567	0.52901	0.992353	0.222259	0.125592	0.675997	0.0879886	0.493032	0.0083806	0.00278684	0.0030274	0.000101194	0.0198631	0.999991	0.274326	0.167013	0.800074	0.116492	0.999965	0.0982526	0.0281917	0.0265475	0.00643014	0.0665878	40	14	14	14	21	8	7	8	8	15	19	-2.11274	-1.09557
LRRC75A	leucine rich repeat containing 75A	coding	blue	0.00701967	0.72261	0.82341	-0.514395	0.782144	0.0707207	0.869287	0.898689	0.865155	0.836228	0.55758	0.96571	0.00350666	0.000295806	0.0598442	2.8041e-05	0.86784	0.0110443	0.0024061	0.0055266	0.000102474	0.0131223	0.999991	0.00666092	0.000813434	0.17722	8.37652e-05	0.999965	0.0982526	0.0260821	0.03636	0.00644798	0.0499762	40	14	14	14	21	8	7	8	8	15	19	0.230514	0.560789
ITGA3	integrin subunit alpha 3	coding	blue	0.0176037	0.851058	0.752679	0.386144	0.768405	-0.223002	0.905142	0.905342	0.88638	0.836223	0.592215	0.914144	0.000113447	0.00189258	0.172656	4.72942e-05	0.595528	0.00505475	0.00197269	0.00336156	0.000102495	0.00755027	0.999991	0.000351168	0.0039714	0.34425	0.000132367	0.999965	0.0982526	0.0240525	0.0276918	0.00644798	0.0344785	40	14	14	14	21	8	7	8	8	15	19	1.54419	1.28966
C15orf54			yellow	-0.0230785	-0.929239	-0.951377	0.75748	-0.903549	-0.224119	-0.892703	-0.884771	-0.900385	-0.836064	-0.666602	0.887592	1.55402e-06	1.71731e-07	0.00170182	2.00973e-08	0.593636	0.00683115	0.003502	0.00229028	0.000103103	0.00182804	0.999991	1.11715e-05	2.22038e-06	0.0252215	1.19401e-06	0.999965	0.0982526	0.0318532	0.0229288	0.00645413	0.0130119	40	14	14	14	21	8	7	8	8	15	19	-3.39233	-2.50267
TRNP1	TMF1 regulated nuclear protein 1	coding	red	-0.0473527	-0.819216	-0.894496	0.612071	-0.827987	0.112727	0.873816	0.927605	0.83138	0.835595	0.503476	0.771701	0.000337274	1.58066e-05	0.0199937	3.6003e-06	0.790422	0.010138	0.000897792	0.0105212	0.000104907	0.0279777	0.999991	0.0008838	7.33751e-05	0.093672	1.56017e-05	0.999965	0.0982526	0.0163112	0.0519141	0.00653171	0.084273	40	14	14	14	21	8	7	8	8	15	19	-1.94748	-2.50267
FLI1	Fli-1 proto-oncogene, ETS transcription factor	coding	blue	0.00599762	0.877904	0.746793	0.127111	0.746529	-0.204823	0.813831	0.912378	0.927726	0.835436	0.607504	0.970701	3.65831e-05	0.00214922	0.664994	0.000101527	0.626563	0.0259105	0.00157321	0.000893409	0.000105529	0.00580041	0.999991	0.000136983	0.0044262	0.792194	0.000257174	0.999965	0.116557	0.0213906	0.0147994	0.00653171	0.0286192	40	14	14	14	21	8	7	8	8	15	19	1.41006	1.53976
NFKBIA	NFKB inhibitor alpha	coding	blue	0.040695	0.940031	0.947455	-0.430033	0.513242	0.925061	0.881932	0.985395	0.985706	0.835276	0.836901	0.803114	5.89656e-07	2.71182e-07	0.124845	0.0173362	0.000993862	0.00862468	7.70351e-06	7.2239e-06	0.000106151	7.92305e-06	0.999991	5.29183e-06	3.15464e-06	0.279657	0.02662	0.327515	0.0982526	0.00330387	0.00266847	0.00653171	0.000305448	40	14	14	14	21	8	7	8	8	15	19	1.97477	2.35059
DHH	desert hedgehog signaling molecule	coding	blue	0.00549641	0.898076	0.95207	-0.35585	0.878312	-0.0853198	0.846195	0.850588	0.883953	0.835211	0.611221	0.973148	1.29527e-05	1.57809e-07	0.211773	1.65161e-07	0.8408	0.016373	0.00743218	0.00357486	0.000106408	0.00542957	0.999991	5.91928e-05	2.0961e-06	0.390075	2.10955e-06	0.999965	0.0989261	0.0490349	0.0286047	0.00653171	0.0273424	40	14	14	14	21	8	7	8	8	15	19	0.333779	0.312999
WDR26	WD repeat domain 26	coding	blue	0.130242	0.29724	0.219679	0.0956719	0.249556	-0.150121	0.86818	0.942506	0.851821	0.83444	0.503075	0.423117	0.302052	0.450477	0.744921	0.275291	0.722723	0.0112727	0.00045487	0.0072567	0.000109471	0.0281231	0.999991	0.359173	0.512117	0.845947	0.326125	0.999965	0.0982526	0.0118965	0.0418236	0.0066775	0.0846304	40	14	14	14	21	8	7	8	8	15	19	0.99919	1.30322
TNRC6A	trinucleotide repeat containing adaptor 6A	coding	yellow	-0.0786401	-0.120725	0.145044	-0.507531	-0.0425515	0.871718	-0.85359	-0.958438	-0.974487	-0.834348	-0.646249	0.629564	0.680994	0.620786	0.0639374	0.85469	0.00478284	0.0145358	0.000173936	4.07272e-05	0.00010984	0.00279433	0.999991	0.729389	0.674211	0.185093	0.877878	0.570557	0.0982526	0.0075883	0.0046586	0.0066775	0.0175096	40	14	14	14	21	8	7	8	8	15	19	1.09307	0.997324
CLK4	CDC like kinase 4	coding	blue	0.0169879	0.557644	0.360692	0.228412	0.414773	0.816659	0.862323	0.931309	0.974753	0.834215	0.767964	0.917137	0.0382666	0.205178	0.432203	0.0615428	0.0133662	0.0125257	0.000769102	3.94739e-05	0.000110379	0.0001233	0.999991	0.0571423	0.258028	0.607387	0.0842765	0.857947	0.0982526	0.0151958	0.0046586	0.00667822	0.00194892	40	14	14	14	21	8	7	8	8	15	19	0.347291	0.257626
CWC25	CWC25 spliceosome associated protein homolog	coding	blue	0.0113599	0.0844702	0.00600229	0.0634032	0.0535083	0.846979	0.885049	0.90015	0.895331	0.833361	0.52451	0.944536	0.774033	0.983753	0.82951	0.817815	0.00796103	0.00808072	0.00230609	0.00264641	0.000113877	0.021138	0.999991	0.810906	0.986561	0.900786	0.847645	0.71776	0.0982526	0.0256921	0.0245919	0.00681952	0.0694261	40	14	14	14	21	8	7	8	8	15	19	-0.176551	0.217758
F2R	coagulation factor II thrombin receptor	coding	yellow	-0.0317597	-0.884919	-0.919901	0.0669102	-0.83245	-0.387895	-0.852636	-0.978247	-0.950487	-0.833318	-0.612226	0.845749	2.60577e-05	3.20277e-06	0.820216	2.85694e-06	0.342358	0.0147659	2.53161e-05	0.000292292	0.000114055	0.00533269	0.999991	0.000103551	2.07731e-05	0.8949	1.30608e-05	0.999965	0.0982526	0.00367956	0.00924832	0.00681952	0.027016	40	14	14	14	21	8	7	8	8	15	19	1.231	1.16783
LPCAT4	lysophosphatidylcholine acyltransferase 4	coding	blue	0.0124315	0.435114	0.741914	-0.546513	0.570086	-0.438726	0.60919	0.962262	0.987841	0.833162	0.693717	0.939313	0.119964	0.00238217	0.0431607	0.00697149	0.276851	0.146493	0.000130591	4.45318e-06	0.000114704	0.000986865	0.999991	0.159108	0.00482888	0.146109	0.0116405	0.999965	0.348392	0.00652699	0.00257874	0.00681952	0.0083471	40	14	14	14	21	8	7	8	8	15	19	0.865762	0.951754
ZDHHC17	zinc finger DHHC-type palmitoyltransferase 17	coding	blue	0.0126349	0.791198	0.752049	0.46783	0.70032	-0.390204	0.864489	0.95555	0.918742	0.833018	0.783317	0.938322	0.000750267	0.00191885	0.091614	0.000407717	0.339241	0.0120534	0.0002123	0.00126092	0.000115309	7.29262e-05	0.999991	0.00174396	0.00401574	0.231229	0.000887821	0.999965	0.0982526	0.00831123	0.0175598	0.00681952	0.00139088	40	14	14	14	21	8	7	8	8	15	19	-0.0112926	0.721576
TEAD4	TEA domain transcription factor 4	coding	red	-0.0257899	-0.699787	-0.516352	-0.78456	-0.60326	0.0485962	0.897515	0.927063	0.910193	0.832994	0.492551	0.874485	0.00533361	0.0587124	0.000891333	0.00379039	0.909025	0.00610716	0.000917724	0.00169104	0.000115411	0.0321553	0.999991	0.00967765	0.0849449	0.0199133	0.00670061	0.999965	0.0982526	0.0164838	0.0204624	0.00681952	0.0926204	40	14	14	14	21	8	7	8	8	15	19	0.587381	0.111333
ZFPL1	zinc finger protein like 1	coding	yellow	-0.0157744	0.0166048	-0.443338	0.302718	-0.223367	-0.330302	-0.884588	-0.93931	-0.936813	-0.83224	-0.632605	0.923037	0.955071	0.112339	0.292797	0.33041	0.424254	0.00815992	0.000533725	0.000601192	0.000118612	0.00365343	0.999991	0.962684	0.150976	0.474791	0.384576	0.999965	0.0982526	0.0128064	0.0124624	0.00697607	0.0208945	40	14	14	14	21	8	7	8	8	15	19	-1.52927	-1.35784
NFYC	nuclear transcription factor Y subunit gamma	coding	blue	0.00185471	0.760384	0.888153	-0.491499	0.757775	-0.0489462	0.868291	0.837091	0.872274	0.831962	0.642296	0.990938	0.00159405	2.21207e-05	0.0742723	6.92269e-05	0.908372	0.0112496	0.0095311	0.00472301	0.000119808	0.00302393	0.999991	0.00334608	9.62877e-05	0.202114	0.000183671	0.999965	0.0982526	0.0568494	0.0332297	0.00700301	0.0184366	40	14	14	14	21	8	7	8	8	15	19	0.291492	0.262434
LYST	lysosomal trafficking regulator	coding	blue	0.0345065	0.984184	0.978099	0.254942	0.90865	-0.0651669	0.892142	0.976522	0.976912	0.831843	0.539937	0.83259	2.18443e-10	1.5198e-09	0.379056	1.22413e-08	0.878157	0.0069186	3.17879e-05	3.02363e-05	0.000120323	0.0170205	0.999991	2.68716e-08	8.50349e-08	0.557798	1.19401e-06	0.999965	0.0982526	0.0039175	0.00439469	0.00700301	0.0599342	40	14	14	14	21	8	7	8	8	15	19	1.09163	1.38598
HYAL2	hyaluronidase 2	coding	blue	0.00944484	0.832492	0.845245	-0.239193	0.823539	0.305421	0.873508	0.917095	0.953838	0.831749	0.616761	0.953875	0.000220034	0.000140868	0.41017	4.50481e-06	0.461952	0.0101983	0.00133746	0.000237486	0.000120732	0.00491298	0.999991	0.000612175	0.000439061	0.587517	1.84706e-05	0.999965	0.0982526	0.019597	0.00827363	0.00700301	0.0253985	40	14	14	14	21	8	7	8	8	15	19	2.57086	2.27345
CKAP4	cytoskeleton associated protein 4	coding	yellow	-0.0582957	-0.957739	-0.953822	-0.5962	-0.505483	-0.350109	-0.87095	-0.961823	-0.908066	-0.83049	-0.758855	0.720862	7.50662e-08	1.26693e-07	0.0244329	0.0194097	0.395216	0.0107065	0.000135155	0.00181108	0.000126322	0.000165353	0.999991	1.19529e-06	1.78003e-06	0.104695	0.029503	0.999965	0.0982526	0.00659857	0.0210101	0.00729381	0.00237331	40	14	14	14	21	8	7	8	8	15	19	1.34397	0.992915
NET1	neuroepithelial cell transforming 1	coding	blue	0.0409005	0.947349	0.960175	-0.69348	0.847507	0.176252	0.839436	0.911816	0.893531	0.830227	0.611823	0.802139	2.74432e-07	5.28529e-08	0.0059505	1.2427e-06	0.676309	0.0181616	0.00160301	0.0027814	0.000127515	0.00537137	0.999991	3.0467e-06	9.20828e-07	0.0479543	7.12649e-06	0.999965	0.101711	0.0215561	0.0253404	0.00730606	0.0271534	40	14	14	14	21	8	7	8	8	15	19	1.42495	1.8153
FNIP2	folliculin interacting protein 2	coding	blue	0.0405298	0.977812	0.98744	-0.757109	0.715186	0.363589	0.882339	0.91892	0.88915	0.830169	0.547346	0.803897	1.64218e-09	5.5159e-11	0.00171598	0.000268335	0.37597	0.0085526	0.00125283	0.00312838	0.000127781	0.0152846	0.999991	9.296e-08	1.04102e-08	0.0253133	0.000611478	0.999965	0.0982526	0.019018	0.0269839	0.00730606	0.0557787	40	14	14	14	21	8	7	8	8	15	19	1.22516	1.27204
YKT6	YKT6 v-SNARE homolog	coding	brown	-0.0319606	-0.960521	-0.947018	-0.339876	-0.893933	-0.0751808	-0.87921	-0.985345	-0.899237	-0.829909	-0.751032	0.844785	5.01938e-08	2.84737e-07	0.234461	4.76939e-08	0.859566	0.00911662	7.78168e-06	0.00236826	0.000128969	0.000210674	0.999991	9.04132e-07	3.27021e-06	0.414131	1.37379e-06	0.999965	0.0982526	0.00330387	0.0231339	0.00730606	0.00277498	40	14	14	14	21	8	7	8	8	15	19	0.549158	0.379889
PAWR	pro-apoptotic WT1 regulator	coding	white	0.0111789	-0.538774	-0.416161	-0.154079	-0.449395	-0.612858	-0.551904	-0.972081	-0.85121	-0.829857	-0.461149	0.945418	0.0468235	0.138853	0.598945	0.0409743	0.106203	0.198974	5.32748e-05	0.00734335	0.000129209	0.0468929	0.999991	0.0685123	0.182647	0.743757	0.0582746	0.999965	0.421798	0.00464352	0.0420737	0.00730606	0.120963	40	14	14	14	21	8	7	8	8	15	19	0.469037	0.763529
PDGFB	platelet derived growth factor subunit B	coding	yellow	-0.00605041	-0.768311	-0.918728	0.590236	-0.779009	-0.376222	-0.864401	-0.971419	-0.921976	-0.829632	-0.568206	0.970443	0.00132728	3.48564e-06	0.0262787	3.16947e-05	0.358322	0.0120725	5.71255e-05	0.00111909	0.000130252	0.0111442	0.999991	0.00285336	2.22831e-05	0.109268	9.33348e-05	0.999965	0.0982526	0.00464352	0.0164907	0.00730606	0.0446935	40	14	14	14	21	8	7	8	8	15	19	0.208864	-0.0640479
IGSF9B	immunoglobulin superfamily member 9B	coding	blue	0.0125511	0.944722	0.968535	-0.849051	0.872329	0.230356	0.864645	0.877765	0.839772	0.829622	0.618693	0.93873	3.65442e-07	1.30927e-08	0.000122373	2.54321e-07	0.583118	0.0120199	0.0041576	0.0090876	0.000130295	0.0047426	0.999991	3.69681e-06	3.56572e-07	0.0120767	2.65556e-06	0.999965	0.0982526	0.0346102	0.0473697	0.00730606	0.0248633	40	14	14	14	21	8	7	8	8	15	19	0.652162	0.732894
GMFB	glia maturation factor beta	coding	yellow	-0.0434412	-0.759711	-0.697347	-0.181552	-0.712718	0.303333	-0.882166	-0.949629	-0.981905	-0.829561	-0.885731	0.790116	0.00161852	0.00556606	0.53449	0.000288138	0.465175	0.00858316	0.000307557	1.46118e-05	0.000130579	4.58058e-07	0.999991	0.00339013	0.0103065	0.69234	0.000652491	0.999965	0.0982526	0.0097839	0.00344828	0.00730606	4.10791e-05	40	14	14	14	21	8	7	8	8	15	19	-1.22506	-0.105971
APOL1	apolipoprotein L1	coding	blue	0.00538962	0.901741	0.914705	-0.0212826	0.874687	-0.047359	0.880229	0.945026	0.856067	0.829375	0.700624	0.97367	1.04831e-05	4.6163e-06	0.942431	2.15089e-07	0.911335	0.00893055	0.000398411	0.00667304	0.000131447	0.000834699	0.999991	5.00601e-05	2.77967e-05	0.9669	2.41975e-06	0.999965	0.0982526	0.0110118	0.039821	0.00732223	0.00742243	40	14	14	14	21	8	7	8	8	15	19	0.914566	0.935789
FUT1	fucosyltransferase 1 (H blood group)	coding	grey	0.01474	-0.109671	0.414231	-0.736209	0.130529	0.973208	0.876346	0.951826	0.917938	0.829222	0.133868	0.928071	0.708984	0.140881	0.00267944	0.572785	4.71183e-05	0.00965124	0.000269493	0.0012979	0.000132164	0.58481	0.999991	0.755083	0.18495	0.0311697	0.624062	0.0896382	0.0982526	0.00928539	0.0177941	0.00732987	0.718721	40	14	14	14	21	8	7	8	8	15	19	-0.186514	0.00493723
SETDB2	SET domain bifurcated histone lysine methyltransferase 2	coding	blue	0.0163761	0.90884	0.856816	0.584804	0.81737	0.662939	0.899758	0.896614	0.861347	0.828834	0.525792	0.920111	6.79094e-06	9.07254e-05	0.0280494	6.08556e-06	0.0731642	0.00578558	0.00255286	0.00599012	0.000133993	0.0207684	0.999991	3.54109e-05	0.000303659	0.113318	2.33967e-05	0.999965	0.0982526	0.0269202	0.0377212	0.00739887	0.0687298	40	14	14	14	21	8	7	8	8	15	19	-0.23873	-0.0559929
CRBN	cereblon	coding	blue	0.029229	0.877855	0.86036	-0.0234231	0.776357	-0.516579	0.888504	0.941769	0.968124	0.828674	0.699009	0.857909	3.6667e-05	7.86897e-05	0.936651	3.51021e-05	0.189934	0.00750156	0.000472315	7.90506e-05	0.000134756	0.000868395	0.999991	0.000137257	0.000269291	0.963739	0.000102038	0.999965	0.0982526	0.012017	0.00570677	0.00740865	0.0076203	40	14	14	14	21	8	7	8	8	15	19	0.37778	0.897429
H6PD	hexose-6-phosphate dehydrogenase/glucose 1-dehydrogenase	coding	tan	-0.00515743	0.949075	0.56638	0.858751	0.681259	-0.0977443	-0.887404	-0.878877	-0.910221	-0.828392	-0.757523	0.974804	2.25528e-07	0.0347219	8.39815e-05	0.000673406	0.817893	0.00768329	0.00404866	0.00168947	0.000136106	0.000172427	0.999991	2.65284e-06	0.053086	0.0113594	0.00139571	0.999965	0.0982526	0.0341302	0.0204624	0.00745049	0.00243886	40	14	14	14	21	8	7	8	8	15	19	1.27919	1.23822
SLC22A23	solute carrier family 22 member 23	coding	tan	0.0166744	0.741976	0.752048	-0.241108	0.706804	-0.0108665	-0.915321	-0.834841	-0.89568	-0.828156	-0.590135	0.918661	0.00237912	0.00191886	0.406319	0.000340764	0.979627	0.00382741	0.00991372	0.00262079	0.000137244	0.00781828	0.999991	0.00472646	0.00401574	0.583786	0.000757155	0.999965	0.0982526	0.0582252	0.0244395	0.00748037	0.0353348	40	14	14	14	21	8	7	8	8	15	19	-0.206906	0.169613
RIN1	Ras and Rab interactor 1	coding	blue	0.0191905	0.431977	0.480016	0.000213589	0.45566	-0.0922211	0.856962	0.909653	0.874716	0.827885	0.43361	0.906438	0.122961	0.0823667	0.999422	0.0379075	0.828063	0.0137393	0.00172097	0.00446585	0.000138561	0.063638	0.999991	0.162607	0.114592	0.999738	0.0542854	0.999965	0.0982526	0.0222873	0.0321587	0.00751976	0.150496	40	14	14	14	21	8	7	8	8	15	19	0.114341	0.227968
RGL1	ral guanine nucleotide dissociation stimulator like 1	coding	yellow	-0.00431502	-0.445963	-0.871091	0.419224	-0.620921	0.246033	-0.872934	-0.878419	-0.952098	-0.827143	-0.736379	0.978918	0.109977	4.99001e-05	0.135673	0.00266615	0.556966	0.0103112	0.00409324	0.000265015	0.000142217	0.000324243	0.999991	0.147191	0.000184445	0.29509	0.00486205	0.999965	0.0982526	0.0342818	0.00879557	0.0076852	0.00375927	40	14	14	14	21	8	7	8	8	15	19	0.43482	0.222884
FOXO1	forkhead box O1	coding	tan	0.0104081	0.817281	0.766629	0.446011	0.786892	-0.145337	-0.879077	-0.910399	-0.957281	-0.827	-0.791237	0.949176	0.000357918	0.00138065	0.109935	2.32058e-05	0.731306	0.00914114	0.00167969	0.000188707	0.000142932	5.47121e-05	0.999991	0.000927968	0.00302465	0.25882	7.12573e-05	0.999965	0.0982526	0.0220328	0.00759529	0.00769097	0.00112311	40	14	14	14	21	8	7	8	8	15	19	1.49781	1.73156
GNGT2	G protein subunit gamma transducin 2	coding	blue	-0.00981887	0.306983	-0.100522	0.371863	0.118098	0.351539	0.895059	0.933344	0.851846	0.826749	0.730984	0.95205	0.285708	0.732412	0.190462	0.61016	0.393155	0.00647071	0.000703872	0.00725326	0.000144195	0.000377431	0.999991	0.342443	0.774361	0.366118	0.660402	0.999965	0.0982526	0.014567	0.0418236	0.00772605	0.00419018	40	14	14	14	21	8	7	8	8	15	19	-1.09311	-1.35784
ZMIZ1	zinc finger MIZ-type containing 1	coding	blue	0.0178504	0.833273	0.837626	-0.434537	0.655543	-0.75324	0.446414	0.951199	0.883979	0.826519	0.55898	0.912945	0.000214334	0.000184707	0.120511	0.00125502	0.0309547	0.315345	0.000280016	0.00357253	0.000145357	0.0128466	0.999991	0.000600144	0.000548011	0.273158	0.00245472	0.999965	0.550299	0.0094653	0.0286047	0.00773025	0.0493303	40	14	14	14	21	8	7	8	8	15	19	1.87618	1.61448
FBRS	fibrosin	coding	skyblue	-0.0142433	0.00239171	0.12946	-0.250967	0.0577129	-0.150337	-0.84459	-0.880393	-0.913219	-0.826492	-0.638806	0.930489	0.993526	0.659143	0.386788	0.803759	0.722336	0.0167882	0.00390316	0.00152937	0.000145496	0.00323934	0.999991	0.994469	0.709773	0.565321	0.835541	0.999965	0.0997795	0.0333934	0.0193697	0.00773025	0.0193123	40	14	14	14	21	8	7	8	8	15	19	0.845179	0.741803
KDM4B	lysine demethylase 4B	coding	grey60	-0.00586288	0.651812	-0.0269878	0.615741	0.298411	-0.486335	-0.858053	-0.923951	-0.860566	-0.826234	-0.488867	0.971358	0.0115431	0.927032	0.0190603	0.188869	0.221705	0.0134872	0.0010378	0.00608812	0.000146809	0.033668	0.999991	0.0193944	0.941022	0.0913438	0.232343	0.999965	0.0982526	0.017474	0.0380169	0.00776737	0.0959721	40	14	14	14	21	8	7	8	8	15	19	0.602675	0.312999
METTL7A	methyltransferase like 7A	coding	blue	0.0149195	0.871285	0.937854	-0.506877	0.86774	0.0736903	0.854007	0.932467	0.927518	0.826061	0.705626	0.927197	4.94713e-05	7.26819e-07	0.0643378	3.49121e-07	0.86233	0.0144358	0.000731519	0.00090097	0.000147696	0.000737272	0.999991	0.000175474	6.58826e-06	0.185785	3.20133e-06	0.999965	0.0982526	0.0147764	0.0148494	0.00777127	0.00679167	40	14	14	14	21	8	7	8	8	15	19	0.522383	1.04657
ELF1	E74 like ETS transcription factor 1	coding	blue	0.0514127	0.888528	0.891969	0.176706	0.608176	-0.100825	0.829282	0.876064	0.922372	0.825846	0.715305	0.752716	2.16984e-05	1.81163e-05	0.545634	0.00344378	0.812231	0.0210491	0.00432776	0.00110246	0.000148805	0.000575703	0.999991	8.99301e-05	8.17853e-05	0.702315	0.00614457	0.999965	0.105962	0.0353975	0.0164008	0.00777127	0.00571859	40	14	14	14	21	8	7	8	8	15	19	0.843085	1.51864
PTPRG	protein tyrosine phosphatase receptor type G	coding	blue	0.0242017	0.954342	0.950586	0.55388	0.848902	0.0171059	0.92655	0.936575	0.890332	0.825772	0.638548	0.882159	1.18495e-07	1.88865e-07	0.0398733	1.14529e-06	0.967933	0.00269853	0.000607898	0.00303218	0.000149187	0.00325581	0.999991	1.65201e-06	2.37869e-06	0.138801	6.7321e-06	0.999965	0.0982526	0.0135571	0.026571	0.00777127	0.0193922	40	14	14	14	21	8	7	8	8	15	19	1.81117	1.79944
RASSF9	Ras association domain family member 9	coding	blue	0.0181143	0.927736	0.944242	-0.412065	0.882373	-0.257971	0.831488	0.932151	0.93207	0.82574	0.732888	0.911663	1.75706e-06	3.84461e-07	0.143181	1.21621e-07	0.537335	0.0204012	0.000741658	0.000744284	0.000149354	0.000357874	0.999991	1.22751e-05	4.06141e-06	0.304957	1.80643e-06	0.999965	0.104916	0.0149258	0.0137998	0.00777127	0.00403685	40	14	14	14	21	8	7	8	8	15	19	0.351734	0.75493
NDRG1	N-myc downstream regulated 1	coding	blue	0.0167845	0.947182	0.962002	-0.417151	0.52656	0.133618	0.90682	0.979886	0.98503	0.825192	0.542057	0.918125	2.79573e-07	4.0036e-08	0.137819	0.0141948	0.752433	0.00483872	2.00376e-05	8.29247e-06	0.000152221	0.0165084	0.999991	3.08482e-06	7.64735e-07	0.298259	0.0221788	0.999965	0.0982526	0.00364153	0.00266847	0.00777127	0.0586042	40	14	14	14	21	8	7	8	8	15	19	2.31285	2.72906
MSRB3	methionine sulfoxide reductase B3	coding	blue	0.0142721	0.892981	0.977898	-0.380532	0.858968	0.152975	0.821103	0.926792	0.929118	0.824992	0.676007	0.930348	1.71604e-05	1.60471e-09	0.179519	6.19987e-07	0.717615	0.0235515	0.000927797	0.000843668	0.000153278	0.0014865	0.999991	7.44148e-05	8.71357e-08	0.351942	4.57415e-06	0.999965	0.111373	0.0165706	0.014634	0.00777127	0.0112326	40	14	14	14	21	8	7	8	8	15	19	1.29203	1.55006
SP1	Sp1 transcription factor	coding	blue	0.0156673	0.876335	0.885965	-0.124481	0.859604	-0.643421	0.88105	0.983279	0.975846	0.824961	0.829023	0.923558	3.93556e-05	2.47263e-05	0.67157	5.95482e-07	0.0851957	0.00878244	1.15409e-05	3.45953e-05	0.000153445	1.15002e-05	0.999991	0.000145003	0.000105594	0.797146	4.45613e-06	0.999965	0.0982526	0.00330387	0.00464939	0.00777127	0.000384566	40	14	14	14	21	8	7	8	8	15	19	1.26719	1.36042
GABPB1	GA binding protein transcription factor subunit beta 1	coding	yellow	-0.0368295	-0.887504	-0.896027	0.257934	-0.889324	0.14568	-0.906875	-0.95733	-0.973557	-0.824868	-0.848985	0.821496	2.28686e-05	1.45291e-05	0.373292	7.0127e-08	0.730689	0.00483175	0.000188058	4.5315e-05	0.000153934	4.30085e-06	0.999991	9.34627e-05	6.86288e-05	0.551885	1.51589e-06	0.999965	0.0982526	0.00782233	0.0046586	0.00777127	0.000202926	40	14	14	14	21	8	7	8	8	15	19	0.0113847	0.0927243
DNAJC6	DnaJ heat shock protein family (Hsp40) member C6	coding	tan	0.0819232	0.646785	0.690603	-0.275781	0.556272	0.202232	-0.879043	-0.957949	-0.867302	-0.824857	-0.616143	0.615285	0.0124241	0.00624971	0.339903	0.0088254	0.631027	0.00914727	0.000180081	0.0052757	0.000153992	0.00496847	0.999991	0.020726	0.0114136	0.521167	0.0144034	0.999965	0.0982526	0.00769976	0.0352969	0.00777127	0.025612	40	14	14	14	21	8	7	8	8	15	19	-0.186514	-0.506239
PLCG2	phospholipase C gamma 2	coding	blue	0.00698321	0.941754	0.946016	-0.479134	0.878271	0.0532385	0.885887	0.952004	0.916888	0.824771	0.533581	0.965888	4.96866e-07	3.17912e-07	0.0830124	1.65665e-07	0.900366	0.00793805	0.000266559	0.00134727	0.000154455	0.0186317	0.999991	4.65053e-06	3.53873e-06	0.216923	2.10992e-06	0.999965	0.0982526	0.00926001	0.0180743	0.00777127	0.0637784	40	14	14	14	21	8	7	8	8	15	19	1.01714	0.995858
MINDY1	MINDY lysine 48 deubiquitinase 1	coding	blue	-0.000166409	0.903912	0.855195	0.0749203	0.82199	0.00947342	0.883691	0.980246	0.969572	0.824682	0.599782	0.999187	9.21233e-06	9.67115e-05	0.799073	4.86343e-06	0.982238	0.00831531	1.8987e-05	6.88329e-05	0.000154928	0.00663728	0.999991	4.52037e-05	0.000320303	0.880374	1.95108e-05	0.999965	0.0982526	0.00364153	0.00543245	0.00777127	0.0314221	40	14	14	14	21	8	7	8	8	15	19	0.16917	0.18608
KIAA0040	KIAA0040	coding	yellow	-0.00479287	-0.764615	-0.887152	0.417502	-0.826919	0.157681	-0.923641	-0.941321	-0.964365	-0.82465	-0.832926	0.976584	0.00144683	2.32829e-05	0.137454	3.80157e-06	0.709213	0.00296893	0.000483133	0.000110126	0.000155097	9.5847e-06	0.999991	0.00307534	0.000100414	0.297723	1.63224e-05	0.999965	0.0982526	0.0120975	0.00615068	0.00777127	0.000340696	40	14	14	14	21	8	7	8	8	15	19	-0.589291	-0.745437
HSPA1A	heat shock protein family A (Hsp70) member 1A	coding	blue	-0.00287777	0.783331	0.917942	-0.541645	0.830865	0.87337	0.861651	0.91545	0.953441	0.824405	0.823578	0.985939	0.000919622	3.68624e-06	0.0454392	3.10392e-06	0.0046064	0.0126742	0.00141686	0.000243587	0.000156413	1.47192e-05	0.999991	0.00207506	2.32714e-05	0.150513	1.3923e-05	0.560076	0.0982526	0.0202685	0.00838388	0.00777127	0.000453634	40	14	14	14	21	8	7	8	8	15	19	0.126926	0.117413
LIMS2	LIM zinc finger domain containing 2	coding	blue	0.013036	0.919602	0.975272	-0.634157	0.864302	-0.116928	0.800702	0.805538	0.870497	0.824357	0.653268	0.936368	3.27289e-06	3.12951e-09	0.014865	4.39302e-07	0.782749	0.0304926	0.0158072	0.00491607	0.000156676	0.00242222	0.999991	2.02672e-05	1.35493e-07	0.0796319	3.70826e-06	0.999965	0.12738	0.0760471	0.0340506	0.00777127	0.0158126	40	14	14	14	21	8	7	8	8	15	19	1.94679	1.81334
ANAPC16	anaphase promoting complex subunit 16	coding	blue	0.0239051	0.961827	0.950392	0.510058	0.901522	0.224195	0.852169	0.97565	0.949391	0.824159	0.760992	0.883593	4.11364e-08	1.93288e-07	0.0624083	2.42897e-08	0.593507	0.0148792	3.54372e-05	0.000311875	0.000157746	0.000154528	0.999991	7.82994e-07	2.42955e-06	0.182042	1.26295e-06	0.999965	0.0982526	0.00410762	0.00956349	0.00777127	0.00227475	40	14	14	14	21	8	7	8	8	15	19	0.695564	0.763529
NCAPH2	non-SMC condensin II complex subunit H2	coding	brown	-0.0164059	-0.943313	-0.894145	-0.403713	-0.864837	-0.640758	-0.85665	-0.945063	-0.908677	-0.823979	-0.66727	0.919966	4.23683e-07	1.61124e-05	0.152283	4.24042e-07	0.0869199	0.0138119	0.000397621	0.00177605	0.000158725	0.0018018	0.999991	4.166e-06	7.43308e-05	0.317027	3.62512e-06	0.999965	0.0982526	0.0110118	0.0208757	0.00777127	0.0128577	40	14	14	14	21	8	7	8	8	15	19	-0.119746	-0.0804788
HCFC2	host cell factor C2	coding	blue	0.0281764	0.745071	0.887594	-0.412011	0.802725	0.596559	0.831446	0.909187	0.963998	0.823901	0.677761	0.862976	0.00222926	2.27646e-05	0.143239	1.1912e-05	0.118499	0.0204135	0.0017471	0.000113529	0.000159153	0.00142913	0.999991	0.00446312	9.85477e-05	0.305028	4.05676e-05	0.999965	0.104916	0.0224433	0.00619779	0.00777127	0.0109215	40	14	14	14	21	8	7	8	8	15	19	0.16917	0.508301
GCLC	glutamate-cysteine ligase catalytic subunit	coding	blue	0.137122	0.448525	0.517058	0.050171	0.443142	-0.372283	0.817526	0.854208	0.894182	0.823844	0.671326	0.39882	0.107705	0.0583084	0.864754	0.0442246	0.363783	0.0246958	0.00692472	0.00273213	0.000159462	0.00164913	0.999991	0.144426	0.0844377	0.919849	0.0623991	0.999965	0.114179	0.0468327	0.0249623	0.00777127	0.0120771	40	14	14	14	21	8	7	8	8	15	19	-0.0758918	0.129399
NELFB	negative elongation factor complex member B	coding	brown	-0.0413697	-0.93731	-0.957997	-0.205543	-0.694056	-0.892318	-0.526753	-0.978551	-0.9302	-0.823713	-0.229577	0.799915	7.64896e-07	7.24001e-08	0.480839	0.000482786	0.00287486	0.224469	2.42732e-05	0.000806275	0.000160184	0.344414	0.999991	6.42238e-06	1.16056e-06	0.64821	0.00103437	0.472112	0.454873	0.00364605	0.0143724	0.00777127	0.505939	40	14	14	14	21	8	7	8	8	15	19	0.246297	0.18608
CNN3	calponin 3	coding	yellow	-0.00828667	-0.442291	-0.100299	-0.398112	-0.275433	-0.170466	-0.841023	-0.895541	-0.934843	-0.823483	-0.633416	0.959526	0.113291	0.732985	0.158596	0.226874	0.686515	0.0177321	0.00263097	0.000658203	0.000161448	0.00359691	0.999991	0.151099	0.774837	0.326001	0.274502	0.999965	0.101101	0.027359	0.0129495	0.00777127	0.0206986	40	14	14	14	21	8	7	8	8	15	19	1.34397	1.3661
RCHY1	ring finger and CHY zinc finger domain containing 1	coding	grey	0.0080239	-0.00234219	0.145412	-0.3277	0.0985334	0.793374	-0.829069	-0.968185	-0.911428	-0.8234	-0.726468	0.960808	0.99366	0.619892	0.252722	0.670892	0.0187778	0.0211121	7.86012e-05	0.00162374	0.000161909	0.000427454	0.999991	0.994525	0.673587	0.433664	0.716324	0.93831	0.105994	0.00493627	0.0200399	0.00777127	0.00459231	40	14	14	14	21	8	7	8	8	15	19	-0.260836	0.17515
SARS			pink	-0.0397308	-0.78108	-0.741768	-0.411296	-0.769991	-0.124897	0.923229	0.878418	0.971004	0.823378	0.75366	0.80769	0.000973334	0.00238943	0.144004	4.46057e-05	0.768243	0.00300846	0.00409335	5.96324e-05	0.000162032	0.000194397	0.999991	0.00217746	0.00483973	0.306018	0.00012607	0.999965	0.0982526	0.0342818	0.00524107	0.00777127	0.00262623	40	14	14	14	21	8	7	8	8	15	19	1.26388	0.914399
IK	IK cytokine	coding	red	-0.00572056	-0.321124	-0.242943	-0.14176	-0.276965	-0.138001	0.923235	0.88524	0.873946	0.82337	0.614848	0.972053	0.262931	0.402645	0.628798	0.224196	0.744515	0.00300789	0.00346071	0.00454592	0.000162077	0.00508662	0.999991	0.317986	0.464067	0.765564	0.271599	0.999965	0.0982526	0.031748	0.0324397	0.00777127	0.0260301	40	14	14	14	21	8	7	8	8	15	19	0.790713	0.57252
IPO9	importin 9	coding	yellow	-0.0654595	-0.936489	-0.929688	-0.334945	-0.637416	-0.460178	-0.860976	-0.964864	-0.97083	-0.823345	-0.544486	0.688196	8.25544e-07	1.49728e-06	0.241756	0.00188292	0.251239	0.0128245	0.000105601	6.07028e-05	0.000162214	0.0159371	0.999991	6.78771e-06	1.13849e-05	0.422232	0.0035436	0.999965	0.0982526	0.00570007	0.00525745	0.00777127	0.057398	40	14	14	14	21	8	7	8	8	15	19	0.938581	0.757091
MYO1D	myosin ID	coding	grey60	0.0177294	0.497457	0.456185	0.273383	0.464415	-0.199819	-0.870202	-0.955447	-0.951176	-0.82328	-0.797114	0.913533	0.0703026	0.101105	0.344289	0.0339252	0.635192	0.0108576	0.000213768	0.000280408	0.000162575	4.38554e-05	0.999991	0.0985015	0.137722	0.525887	0.0490492	0.999965	0.0982526	0.00833824	0.00906843	0.00777127	0.000972897	40	14	14	14	21	8	7	8	8	15	19	1.33211	0.951754
HYAL1	hyaluronidase 1	coding	blue	0.0139679	0.896827	0.960047	-0.414381	0.887271	-0.130885	0.902865	0.952561	0.965	0.823229	0.636321	0.931829	1.38955e-05	5.38663e-08	0.140722	8.28155e-08	0.757379	0.00535689	0.0002575	0.000104393	0.000162862	0.0034004	0.999991	6.25074e-05	9.33068e-07	0.302004	1.61694e-06	0.999965	0.0982526	0.00906988	0.00609903	0.00777127	0.0200084	40	14	14	14	21	8	7	8	8	15	19	0.410977	0.295085
KRAS	KRAS proto-oncogene, GTPase	coding	blue	0.0186817	0.804166	0.826902	-0.274506	0.832086	0.580622	0.887944	0.945312	0.906354	0.822792	0.546613	0.908908	0.000526299	0.000264518	0.342232	2.91211e-06	0.131263	0.00759377	0.000392319	0.00191161	0.000165308	0.0154496	0.999991	0.00128724	0.000738319	0.523786	1.32459e-05	0.999965	0.0982526	0.0110048	0.0214298	0.00785835	0.0562348	40	14	14	14	21	8	7	8	8	15	19	0.296327	0.872862
FBXL12	F-box and leucine rich repeat protein 12	coding	yellow	-0.0179934	-0.597703	-0.780783	0.576375	-0.664662	0.556452	-0.884837	-0.971493	-0.976293	-0.822242	-0.685462	0.912251	0.0239832	0.000980588	0.0309709	0.00101314	0.15202	0.00811711	5.66844e-05	3.27184e-05	0.000168433	0.00119859	0.999991	0.0374451	0.00226402	0.120069	0.00202132	0.999965	0.0982526	0.00464352	0.00457366	0.00797691	0.0096352	40	14	14	14	21	8	7	8	8	15	19	-0.138141	-0.21992
RAB11A	RAB11A, member RAS oncogene family	coding	blue	0.00554588	0.564534	0.732408	-0.43579	0.652111	0.426662	0.889701	0.906639	0.937328	0.821825	0.641718	0.972906	0.0354498	0.00289322	0.119324	0.00135791	0.291794	0.00730681	0.00189461	0.000586834	0.000170836	0.00305876	0.999991	0.0533513	0.0057226	0.271474	0.00263599	0.999965	0.0982526	0.0235527	0.0123647	0.00803351	0.0185417	40	14	14	14	21	8	7	8	8	15	19	1.2516	1.62415
RAPGEF5	Rap guanine nucleotide exchange factor 5	coding	blue	0.0113492	0.725308	0.830357	-0.296407	0.744752	-0.312927	0.818145	0.962439	0.989463	0.821625	0.62238	0.944588	0.0033284	0.000236248	0.303472	0.000107669	0.450441	0.0244957	0.000128778	2.90129e-06	0.000171999	0.00443093	0.999991	0.00635189	0.000671082	0.485748	0.000270833	0.999965	0.113594	0.00652156	0.00257874	0.00803351	0.023621	40	14	14	14	21	8	7	8	8	15	19	1.33807	1.63681
GPX1	glutathione peroxidase 1	coding	yellow	-0.0475143	-0.743732	-0.744621	-0.000587578	-0.519309	0.216992	-0.891804	-0.942405	-0.965704	-0.821623	-0.749779	0.770943	0.00229316	0.00225059	0.998409	0.0158421	0.605731	0.00697159	0.000457246	9.82724e-05	0.00017201	0.000218827	0.999991	0.0045742	0.00460198	0.999086	0.0245254	0.999965	0.0982526	0.0118965	0.00594572	0.00803351	0.00284606	40	14	14	14	21	8	7	8	8	15	19	0.861697	0.141157
NAA30	N-alpha-acetyltransferase 30, NatC catalytic subunit	coding	yellow	-0.013338	-0.644716	-0.648539	0.048075	-0.638234	0.373323	-0.818348	-0.866326	-0.910585	-0.821596	-0.691927	0.934897	0.0128013	0.0121111	0.870359	0.00184978	0.362338	0.0244303	0.00538874	0.00166947	0.000172169	0.00102988	0.999991	0.0212906	0.0206201	0.923296	0.00348501	0.999965	0.113407	0.0406353	0.0203376	0.00803351	0.00861991	40	14	14	14	21	8	7	8	8	15	19	-0.24969	0.164025
GIT1	GIT ArfGAP 1	coding	red	-0.000649134	-0.522251	-0.306915	-0.32415	-0.379601	-0.215852	0.878721	0.97975	0.98106	0.821382	0.599575	0.996828	0.0553948	0.285819	0.258202	0.0896515	0.607672	0.00920657	2.04467e-05	1.67445e-05	0.000173422	0.00666098	0.999991	0.0795985	0.344765	0.439667	0.118396	0.999965	0.0982526	0.00364153	0.0035289	0.00806223	0.0315107	40	14	14	14	21	8	7	8	8	15	19	1.2275	1.06654
ACAP2	ArfGAP with coiled-coil, ankyrin repeat and PH domains 2	coding	blue	0.00863455	0.552086	0.414437	0.13639	0.48777	-0.116472	0.865367	0.952054	0.879325	0.821166	0.553886	0.957828	0.0406563	0.140663	0.641983	0.0248917	0.783583	0.0118649	0.000265732	0.00400525	0.00017469	0.0138725	0.999991	0.0603402	0.184741	0.776087	0.0369387	0.999965	0.0982526	0.00925668	0.0304148	0.00809139	0.0519757	40	14	14	14	21	8	7	8	8	15	19	0.415012	0.869272
CHST7	carbohydrate sulfotransferase 7	coding	yellow	-0.00787281	-0.85046	-0.968367	0.640858	-0.846817	-0.201399	-0.845266	-0.954258	-0.959427	-0.820796	-0.76154	0.961546	0.00011605	1.35119e-08	0.0135281	1.29342e-06	0.632464	0.0166125	0.000231133	0.000161932	0.000176888	0.000151854	0.999991	0.000357773	3.61576e-07	0.0751987	7.3441e-06	0.999965	0.0993159	0.00864698	0.0073656	0.00813637	0.00224322	40	14	14	14	21	8	7	8	8	15	19	-1.61158	-1.69682
S100A6	S100 calcium binding protein A6	coding	lightcyan	-0.0274692	-0.687401	-0.764393	0.414361	-0.707074	0.0291985	0.919249	0.900592	0.937495	0.820669	0.810055	0.866384	0.00659637	0.00145427	0.140744	0.000338189	0.945284	0.00340622	0.00227641	0.000582237	0.000177648	2.62553e-05	0.999991	0.0117052	0.00316565	0.302004	0.00075196	0.999965	0.0982526	0.0255414	0.0123647	0.00813637	0.000680894	40	14	14	14	21	8	7	8	8	15	19	1.8044	1.7409
DCAF16	DDB1 and CUL4 associated factor 16	coding	tan	-0.0129341	0.806113	0.524692	0.547822	0.619761	-0.573415	-0.843823	-0.896826	-0.960633	-0.820619	-0.809121	0.936864	0.000497929	0.0540621	0.0425627	0.00273019	0.137277	0.0169886	0.00253759	0.000148059	0.000177945	2.72809e-05	0.999991	0.00122836	0.0788574	0.145108	0.00497096	0.999965	0.0997795	0.0268742	0.00711689	0.00813637	0.000699731	40	14	14	14	21	8	7	8	8	15	19	0.578032	0.635976
TNPO1	transportin 1	coding	yellow	-0.0495264	-0.971868	-0.962163	0.137536	-0.868215	0.503588	-0.803045	-0.961463	-0.971727	-0.820571	-0.581542	0.761519	6.73522e-09	3.90436e-08	0.63916	3.38052e-07	0.203265	0.0296443	0.00013898	5.53123e-05	0.000178234	0.00900901	0.999991	2.27719e-07	7.54902e-07	0.773636	3.14082e-06	0.999965	0.125111	0.00669516	0.00514282	0.00813637	0.0388166	40	14	14	14	21	8	7	8	8	15	19	1.14675	1.26161
PIM3	Pim-3 proto-oncogene, serine/threonine kinase	coding	orange	-0.0170109	0.375717	-0.185737	0.11074	0.0255369	-0.77633	-0.552414	-0.948744	-0.940198	-0.82012	-0.537076	0.917025	0.185545	0.524946	0.706261	0.912507	0.0234916	0.198472	0.000323845	0.000510965	0.000180953	0.0177314	0.999991	0.23392	0.584378	0.821002	0.927184	0.98688	0.421087	0.00986751	0.0117904	0.00818639	0.0616479	40	14	14	14	21	8	7	8	8	15	19	1.41183	1.38442
SYNC	syncoilin, intermediate filament protein	coding	blue	0.018374	0.849321	0.8447	0.202605	0.811735	-0.100453	0.866183	0.963217	0.917665	0.820095	0.55002	0.910402	0.000121141	0.000143687	0.487269	7.93398e-06	0.812915	0.0116914	0.000121011	0.00131065	0.00018111	0.014694	0.999991	0.000370722	0.00044598	0.653495	2.8979e-05	0.999965	0.0982526	0.00624564	0.0178346	0.00818639	0.054155	40	14	14	14	21	8	7	8	8	15	19	-0.535945	-0.614378
IL18BP	interleukin 18 binding protein	coding	blue	-0.00499681	0.566972	0.38591	0.303091	0.46583	0.529149	0.89487	0.845398	0.870991	0.820023	0.483397	0.975588	0.0344908	0.172939	0.292173	0.0333133	0.17749	0.00649916	0.00820009	0.00486185	0.000181547	0.0360157	0.999991	0.0520511	0.221989	0.474016	0.0482528	0.999965	0.0982526	0.05169	0.0338349	0.00818639	0.100357	40	14	14	14	21	8	7	8	8	15	19	0.406918	0.19682
MALL	mal, T cell differentiation protein like	coding	blue	-0.00620272	0.034598	0.504893	-0.452414	0.240337	0.339231	0.903983	0.934896	0.874874	0.819844	0.493967	0.969699	0.906529	0.065563	0.104319	0.293993	0.411054	0.00520734	0.000656628	0.00444949	0.000182636	0.0315879	0.999991	0.922951	0.0934765	0.250543	0.345979	0.999965	0.0982526	0.0140969	0.0320592	0.00818639	0.091627	40	14	14	14	21	8	7	8	8	15	19	0.251475	-0.105971
DOK4	docking protein 4	coding	blue	0.00520115	0.128079	0.56796	-0.585613	0.324505	0.366461	0.850397	0.960916	0.945932	0.819815	0.492717	0.97459	0.662581	0.0341076	0.02778	0.151233	0.371925	0.0153137	0.00014492	0.00037929	0.000182813	0.0320884	0.999991	0.712867	0.0522269	0.112736	0.190017	0.999965	0.0984578	0.0068332	0.0102263	0.00818639	0.0925121	40	14	14	14	21	8	7	8	8	15	19	0.461585	0.299612
AK5	adenylate kinase 5	coding	yellow	0.00116224	-0.726077	-0.925473	0.896028	-0.743751	0.218218	-0.855129	-0.852015	-0.888503	-0.81975	-0.642516	0.994321	0.00327894	2.10365e-06	1.45282e-05	0.000111266	0.603645	0.0141691	0.00722942	0.0031819	0.000183215	0.00301072	0.999991	0.00626601	1.4919e-05	0.00940863	0.000278835	0.999965	0.0982526	0.048228	0.0271272	0.00818639	0.0183916	40	14	14	14	21	8	7	8	8	15	19	-2.334	-1.42683
TOB1	transducer of ERBB2, 1	coding	blue	0.0432786	0.771185	0.854492	-0.508441	0.789145	0.928853	0.875873	0.954368	0.974069	0.819312	0.529189	0.790884	0.00123985	9.94008e-05	0.063384	2.11778e-05	0.000852976	0.00974118	0.000229488	4.27475e-05	0.000185919	0.019814	0.999991	0.0026809	0.000327368	0.184039	6.6024e-05	0.327515	0.0982526	0.00863322	0.0046586	0.00827799	0.0664758	40	14	14	14	21	8	7	8	8	15	19	-0.206906	0.42202
P3H3	prolyl 3-hydroxylase 3	coding	yellow	0.00504263	-0.432799	-0.844583	0.83162	-0.610139	-0.381017	-0.871877	-0.960332	-0.883556	-0.819097	-0.716591	0.975364	0.122172	0.000144299	0.00022654	0.00331299	0.351724	0.0105207	0.000151446	0.00361057	0.00018726	0.000556668	0.999991	0.161681	0.000447441	0.0134968	0.00593551	0.999965	0.0982526	0.00696376	0.0287142	0.00828053	0.00557771	40	14	14	14	21	8	7	8	8	15	19	0.483691	0.545807
ARMCX1	armadillo repeat containing X-linked 1	coding	blue	0.00597931	0.353996	0.277098	0.0901574	0.310311	0.525752	0.900291	0.918035	0.97112	0.818888	0.833464	0.97079	0.214332	0.337507	0.759215	0.170991	0.180808	0.00571068	0.00129341	5.89228e-05	0.000188567	9.34337e-06	0.999991	0.265631	0.398597	0.854726	0.212291	0.999965	0.0982526	0.0193374	0.00524107	0.00828053	0.000337563	40	14	14	14	21	8	7	8	8	15	19	-0.331994	-0.00235964
KIAA0391			red	0.00665678	-0.172613	-0.154372	-0.0600612	-0.157624	0.396807	0.929166	0.934509	0.945186	0.818698	0.621894	0.967482	0.555124	0.598242	0.838386	0.495	0.330397	0.00246817	0.000668187	0.000394984	0.000189767	0.00447099	0.999991	0.61372	0.65412	0.905405	0.550223	0.999965	0.0982526	0.0142004	0.0104246	0.00828053	0.0237445	40	14	14	14	21	8	7	8	8	15	19	-0.455653	-0.721579
TCN2	transcobalamin 2	coding	blue	0.0114611	0.894339	0.844198	0.38609	0.807802	0.00950604	0.757321	0.877689	0.871475	0.81868	0.737177	0.944042	1.59428e-05	0.000146333	0.172722	9.4986e-06	0.982177	0.0486524	0.00416511	0.00480924	0.000189877	0.000316943	0.999991	7.00964e-05	0.000451901	0.344323	3.35221e-05	0.999965	0.171423	0.0346271	0.0335797	0.00828053	0.00371666	40	14	14	14	21	8	7	8	8	15	19	1.34397	1.40827
SRL	sarcalumenin	coding	blue	0.0185046	0.967704	0.971178	-0.43198	0.876039	-0.0205293	0.880014	0.913944	0.904193	0.818653	0.6651	0.909767	1.52792e-08	7.77737e-09	0.122959	1.95096e-07	0.961518	0.00896968	0.0014922	0.00204361	0.00019005	0.00188818	0.999991	3.84887e-07	2.47098e-07	0.276756	2.30775e-06	0.999965	0.0982526	0.0208039	0.0219553	0.00828053	0.0132571	40	14	14	14	21	8	7	8	8	15	19	-0.138141	-0.0480412
PGM5	phosphoglucomutase 5	coding	blue	0.00408484	0.884878	0.98624	-0.732127	0.842169	0.253738	0.781077	0.880868	0.908324	0.818639	0.751965	0.980042	2.61113e-05	9.51495e-11	0.00290953	1.68571e-06	0.544267	0.0381284	0.00385827	0.00179618	0.000190138	0.000204767	0.999991	0.000103699	1.4131e-08	0.0327118	8.84107e-06	0.999965	0.146367	0.0333066	0.0209527	0.00828053	0.00271983	40	14	14	14	21	8	7	8	8	15	19	1.27267	1.50652
CARD10	caspase recruitment domain family member 10	coding	blue	0.00759591	0.875523	0.389618	0.75027	0.619335	-0.107314	0.878792	0.91454	0.907275	0.818572	0.535795	0.962897	4.08574e-05	0.168494	0.00199448	0.00275406	0.800325	0.00919351	0.00146208	0.00185707	0.00019056	0.0180572	0.999991	0.000149535	0.216856	0.0272946	0.00500936	0.999965	0.0982526	0.0205422	0.0212513	0.00828053	0.0625227	40	14	14	14	21	8	7	8	8	15	19	0.748501	0.862028
RALY	RALY heterogeneous nuclear ribonucleoprotein	coding	yellow	-0.00261596	-0.426649	-0.202751	-0.334925	-0.318509	0.305243	-0.885518	-0.921287	-0.986615	-0.818461	-0.865486	0.987218	0.12817	0.486949	0.241786	0.159374	0.462226	0.00800077	0.00114837	5.93513e-06	0.000191269	1.7059e-06	0.999991	0.168648	0.548293	0.422232	0.199336	0.999965	0.0982526	0.0183579	0.00258792	0.00828285	0.000106787	40	14	14	14	21	8	7	8	8	15	19	1.06971	1.0017
MAPKAPK5	MAPK activated protein kinase 5	coding	brown	-0.0201615	-0.461355	-0.484663	0.0726146	-0.48597	-0.153283	-0.90279	-0.921244	-0.820272	-0.817991	-0.62632	0.901726	0.0968111	0.0790197	0.805147	0.0255112	0.717065	0.00536701	0.0011502	0.0126279	0.000194274	0.00411661	0.999991	0.131152	0.110348	0.88508	0.0377783	0.999965	0.0982526	0.0183639	0.0578761	0.00836541	0.0225366	40	14	14	14	21	8	7	8	8	15	19	0.465321	0.0735405
USP6NL	USP6 N-terminal like	coding	grey60	-0.00921874	0.368841	0.171144	0.201585	0.25469	-0.501717	-0.861443	-0.950095	-0.971852	-0.817842	-0.830446	0.954978	0.194373	0.558546	0.489511	0.265207	0.205224	0.0127205	0.000299201	5.4584e-05	0.000195233	1.07667e-05	0.999991	0.243569	0.615976	0.655478	0.315747	0.999965	0.0982526	0.0096615	0.0051127	0.00836541	0.00036796	40	14	14	14	21	8	7	8	8	15	19	0.599644	0.782453
FILIP1	filamin A interacting protein 1	coding	darkgrey	0.00231605	0.880847	0.636698	0.438189	0.700157	-0.20624	-0.865515	-0.974491	-0.918134	-0.817834	-0.57308	0.988684	3.18097e-05	0.0143469	0.117073	0.000409537	0.624125	0.0118334	4.07059e-05	0.00128882	0.000195286	0.0103211	0.999991	0.000122334	0.0239398	0.268917	0.000891324	0.999965	0.0982526	0.00420728	0.0177477	0.00836541	0.0424837	40	14	14	14	21	8	7	8	8	15	19	-0.147536	-0.230433
FXYD5	FXYD domain containing ion transport regulator 5	coding	steelblue	0.0149238	0.0581653	0.503794	-0.71554	0.282455	-0.020458	0.863946	0.88107	0.899344	0.817751	0.635148	0.927176	0.843429	0.0662487	0.0040096	0.214766	0.961652	0.0121708	0.00383923	0.00236093	0.000195821	0.00347866	0.999991	0.870554	0.0943266	0.038744	0.261303	0.999965	0.0982526	0.0332778	0.0231339	0.00836541	0.0202923	40	14	14	14	21	8	7	8	8	15	19	1.60023	1.40373
CHST11	carbohydrate sulfotransferase 11	coding	red	-0.0173974	-0.282358	-0.742337	0.695383	-0.47842	0.114476	0.870951	0.895333	0.81072	0.817545	0.537684	0.915146	0.328033	0.00236125	0.00575884	0.0282451	0.787225	0.0107062	0.00264631	0.0146378	0.000197163	0.0175782	0.999991	0.386094	0.00479415	0.0470417	0.0414482	0.999965	0.0982526	0.0274739	0.0636021	0.00839436	0.0614023	40	14	14	14	21	8	7	8	8	15	19	0.0113847	-0.698605
DDB1	damage specific DNA binding protein 1	coding	yellow	-0.0642268	-0.832296	-0.830913	0.00188095	-0.844989	-0.775332	-0.824985	-0.922998	-0.984095	-0.817011	-0.698194	0.693779	0.000221482	0.000231929	0.994908	1.4369e-06	0.0237881	0.0223439	0.00107653	9.93956e-06	0.000200671	0.000885803	0.999991	0.000615391	0.000660826	0.997353	7.87925e-06	0.992742	0.108741	0.0177392	0.0027323	0.00849149	0.00774083	40	14	14	14	21	8	7	8	8	15	19	1.5662	1.37652
ZNF330	zinc finger protein 330	coding	pink	-0.022581	-0.581192	-0.403538	-0.272441	-0.446545	0.834672	0.82847	0.910623	0.979368	0.816993	0.590356	0.890001	0.0292751	0.152478	0.34602	0.0424318	0.00994298	0.0212903	0.0016674	2.16191e-05	0.000200787	0.00778939	0.999991	0.0448326	0.19822	0.527541	0.0601446	0.766759	0.106522	0.0220076	0.00385033	0.00849149	0.035268	40	14	14	14	21	8	7	8	8	15	19	-0.331994	-0.00974339
RHOBTB1	Rho related BTB domain containing 1	coding	salmon	-0.00277445	0.0214184	-0.753606	0.573603	-0.330836	0.435922	-0.823551	-0.895756	-0.94109	-0.816701	-0.738308	0.986444	0.942064	0.00185449	0.0319792	0.142956	0.28029	0.0227858	0.00261522	0.000488786	0.000202724	0.000306836	0.999991	0.95223	0.00390248	0.122268	0.180656	0.999965	0.110029	0.027285	0.0115097	0.00849604	0.00363279	40	14	14	14	21	8	7	8	8	15	19	0.0949989	0.312999
EIF1B	eukaryotic translation initiation factor 1B	coding	blue	0.06633	0.394625	0.290326	0.270692	0.340559	0.776501	0.873242	0.925444	0.967759	0.816699	0.6763	0.684262	0.162613	0.31397	0.349248	0.130877	0.023441	0.0102505	0.000979002	8.17699e-05	0.000202739	0.0014768	0.999991	0.208185	0.374189	0.530607	0.166846	0.98688	0.0982526	0.0169588	0.00580888	0.00849604	0.0111888	40	14	14	14	21	8	7	8	8	15	19	-0.711036	0.0263265
ADRB2	adrenoceptor beta 2	coding	darkgreen	-0.00774318	-0.231364	-0.116793	-0.167523	-0.169044	0.374614	0.935162	0.834733	0.856151	0.816649	0.448159	0.962179	0.426112	0.690909	0.567021	0.463851	0.360547	0.00198504	0.00993236	0.00666173	0.000203074	0.0543108	0.999991	0.48679	0.738195	0.719011	0.519475	0.999965	0.0982526	0.0582512	0.039791	0.00849604	0.134211	40	14	14	14	21	8	7	8	8	15	19	-1.17807	-0.676452
SNAPC4	small nuclear RNA activating complex polypeptide 4	coding	yellow	-0.0277073	-0.91048	-0.930772	0.269102	-0.895655	-0.0398674	-0.852006	-0.940084	-0.943119	-0.816573	-0.743167	0.865237	6.11252e-06	1.36735e-06	0.352198	4.11088e-08	0.925328	0.0149187	0.000513857	0.000440682	0.000203583	0.000266467	0.999991	3.26639e-05	1.0575e-05	0.532978	1.35046e-06	0.999965	0.0982538	0.0125197	0.0109049	0.00849604	0.00329669	40	14	14	14	21	8	7	8	8	15	19	0.0187733	-0.169875
SLC35B2	solute carrier family 35 member B2	coding	yellow	-0.0820992	-0.927399	-0.926138	-0.195224	-0.616428	0.0463135	-0.893353	-0.939008	-0.913855	-0.816471	-0.57149	0.614523	1.80557e-06	1.99656e-06	0.503597	0.00292145	0.913286	0.0067305	0.00054161	0.00149674	0.000204263	0.010584	0.999991	1.25378e-05	1.43283e-05	0.667489	0.00529327	0.999965	0.0982526	0.0128245	0.0191856	0.00849639	0.0431307	40	14	14	14	21	8	7	8	8	15	19	0.126926	-0.414185
DNAJC5	DnaJ heat shock protein family (Hsp40) member C5	coding	yellow	-0.0603514	-0.909826	-0.908306	-0.269394	-0.825861	-0.593558	-0.920669	-0.973136	-0.900886	-0.816039	-0.669909	0.711435	6.3759e-06	7.02466e-06	0.351654	4.01052e-06	0.120847	0.00326099	4.74938e-05	0.00225681	0.000207182	0.00170122	0.999991	3.36772e-05	3.85032e-05	0.532599	1.69666e-05	0.999965	0.0982526	0.00451549	0.022813	0.0085777	0.0123585	40	14	14	14	21	8	7	8	8	15	19	1.00249	0.55484
CDH23	cadherin related 23	coding	blue	0.0102595	0.945331	0.978615	-0.711634	0.857214	-0.303434	0.92256	0.934845	0.93694	0.815972	0.662567	0.949901	3.42384e-07	1.31858e-09	0.00431069	6.92246e-07	0.46502	0.00307332	0.000658134	0.000597643	0.000207636	0.00199337	0.999991	3.56627e-06	7.61347e-08	0.0400211	4.84767e-06	0.999965	0.0982526	0.0141053	0.0124494	0.0085777	0.0137845	40	14	14	14	21	8	7	8	8	15	19	2.58554	2.33095
PMM2	phosphomannomutase 2	coding	brown	-0.0312962	-0.704528	-0.683975	-0.412768	-0.609944	-0.110042	-0.849182	-0.979173	-0.921049	-0.815881	-0.735598	0.847973	0.00490376	0.00698362	0.142432	0.00332575	0.79533	0.0156158	2.22324e-05	0.0011586	0.000208253	0.00033152	0.999991	0.00897757	0.0125848	0.303923	0.00595667	0.999965	0.0984578	0.00364605	0.0167435	0.0085777	0.00381783	40	14	14	14	21	8	7	8	8	15	19	0.214344	-0.252008
CBLN2	cerebellin 2 precursor	coding	blue	0.0119496	0.755778	0.858407	-0.856194	0.790211	-0.899438	0.904847	0.971064	0.960415	0.815675	0.645846	0.941661	0.00176762	8.51505e-05	9.29842e-05	2.02725e-05	0.00235448	0.00509331	5.92659e-05	0.000150505	0.000209666	0.00281705	0.999991	0.00365162	0.000287895	0.0113712	6.36567e-05	0.43783	0.0982526	0.00470968	0.00711689	0.00860789	0.0175996	40	14	14	14	21	8	7	8	8	15	19	-0.860562	-0.263084
BEND3	BEN domain containing 3	coding	brown	-0.0181259	-0.962656	-0.919971	-0.21359	-0.85159	-0.529999	-0.855828	-0.830872	-0.803115	-0.815288	-0.549345	0.911607	3.61243e-08	3.18638e-06	0.463438	9.76447e-07	0.176665	0.0140042	0.0106122	0.0163735	0.000212333	0.0148412	0.999991	7.1049e-07	2.0694e-05	0.6342	6.05848e-06	0.999965	0.0982526	0.0604896	0.068376	0.00868915	0.0545859	40	14	14	14	21	8	7	8	8	15	19	-0.919052	-1.05421
ELMO2	engulfment and cell motility 2	coding	blue	0.00500328	0.200214	0.294013	-0.0973751	0.23266	-0.336173	0.853393	0.95336	0.905307	0.814813	0.710264	0.975556	0.492532	0.307581	0.740521	0.310147	0.415555	0.014583	0.000244845	0.00197485	0.000215639	0.000655646	0.999991	0.552967	0.367475	0.842887	0.363299	0.999965	0.0982526	0.00885094	0.0216608	0.00876938	0.00627129	40	14	14	14	21	8	7	8	8	15	19	0.469037	0.295085
PPP2R5E	protein phosphatase 2 regulatory subunit B'epsilon	coding	grey	-0.00303585	-0.0929405	0.145412	-0.167284	0.014167	0.334357	-0.86877	-0.857072	-0.911533	-0.814645	-0.591341	0.985167	0.751992	0.61989	0.567583	0.9514	0.418238	0.0111507	0.00653942	0.00161812	0.000216823	0.00766198	0.999991	0.792279	0.673587	0.719325	0.960592	0.999965	0.0982526	0.0454846	0.0200011	0.00876938	0.034851	40	14	14	14	21	8	7	8	8	15	19	0.450247	0.757091
FABP5	fatty acid binding protein 5	coding	salmon	-0.0126623	-0.918138	-0.974334	0.845665	-0.883915	-0.689287	-0.851825	-0.913309	-0.906126	-0.814597	-0.48613	0.938189	3.63551e-06	3.90486e-09	0.000138718	1.07962e-07	0.0586025	0.014963	0.00152471	0.00192528	0.000217163	0.0348274	0.999991	2.19537e-05	1.56771e-07	0.0124386	1.7363e-06	0.999965	0.0983513	0.0209793	0.0214578	0.00876938	0.0981705	40	14	14	14	21	8	7	8	8	15	19	-2.66991	-3.18406
SMAD9	SMAD family member 9	coding	blue	0.000407419	0.854348	0.975518	-0.584494	0.828331	-0.0140538	0.84797	0.887347	0.904945	0.81457	0.636156	0.998009	9.99605e-05	2.94903e-09	0.028153	3.53749e-06	0.973653	0.0159205	0.00327894	0.001997	0.000217354	0.00341132	0.999991	0.000316554	1.29932e-07	0.11341	1.53823e-05	0.999965	0.0984887	0.0308269	0.0217502	0.00876938	0.0200446	40	14	14	14	21	8	7	8	8	15	19	0.698184	0.710047
LYPLA1	lysophospholipase 1	coding	brown	-0.019167	-0.950551	-0.892285	-0.27561	-0.852404	0.167566	-0.879128	-0.809117	-0.828727	-0.814466	-0.521801	0.906552	1.89667e-07	1.78127e-05	0.340214	9.29866e-07	0.691645	0.00913174	0.0149934	0.0110023	0.000218085	0.0219361	0.999991	2.34441e-06	8.06452e-05	0.521518	5.86442e-06	0.999965	0.0982526	0.0737997	0.0532433	0.00876938	0.0712677	40	14	14	14	21	8	7	8	8	15	19	-0.147536	0.0800012
SLC4A7	solute carrier family 4 member 7	coding	yellow	-0.0354155	-0.897172	-0.908182	0.142156	-0.874551	0.0110728	-0.894435	-0.900807	-0.836613	-0.814414	-0.520554	0.828245	1.36301e-05	7.0802e-06	0.627831	2.1721e-07	0.97924	0.00656512	0.00226207	0.00961158	0.000218454	0.0223113	0.999991	6.15543e-05	3.87237e-05	0.76474	2.43494e-06	0.999965	0.0982526	0.025471	0.0488499	0.00876938	0.0720628	40	14	14	14	21	8	7	8	8	15	19	0.386238	0.0604135
SAE1	SUMO1 activating enzyme subunit 1	coding	yellow	-0.072553	-0.97764	-0.973466	-0.560313	-0.784209	-0.267168	-0.869555	-0.874137	-0.867091	-0.81408	-0.658204	0.65639	1.71944e-09	4.75851e-09	0.0371566	2.58405e-05	0.522386	0.0109895	0.00452598	0.00529999	0.000220836	0.00218596	0.999991	9.53612e-08	1.78022e-07	0.132463	7.80971e-05	0.999965	0.0982526	0.0364761	0.0354121	0.0088092	0.0146561	40	14	14	14	21	8	7	8	8	15	19	0.65496	0.533556
TNRC6B	trinucleotide repeat containing adaptor 6B	coding	blue	0.0293495	0.798421	0.779316	0.125036	0.751582	-0.234656	0.859675	0.926176	0.86625	0.814079	0.621054	0.857329	0.000617724	0.00101714	0.670181	8.56886e-05	0.575904	0.0131171	0.000950966	0.00539771	0.000220839	0.00454098	0.999991	0.0014777	0.00233467	0.795866	0.000221808	0.999965	0.0982526	0.0168216	0.0356977	0.0088092	0.0240757	40	14	14	14	21	8	7	8	8	15	19	1.4284	1.27204
STUB1	STIP1 homology and U-box containing protein 1	coding	yellow	-0.0190266	-0.83532	-0.961853	0.260984	-0.817145	-0.273341	-0.869278	-0.935985	-0.911083	-0.813853	-0.457704	0.907233	0.000199955	4.0974e-08	0.367465	6.1515e-06	0.512441	0.0110462	0.000624744	0.00164237	0.000222461	0.0487799	0.999991	0.000565517	7.73309e-07	0.546272	2.36215e-05	0.999965	0.0982526	0.0137933	0.0200916	0.00884596	0.124585	40	14	14	14	21	8	7	8	8	15	19	-0.440708	-0.540232
NFAT5	nuclear factor of activated T cells 5	coding	blue	0.00850777	0.722892	0.671855	0.26473	0.689338	-0.0417428	0.899647	0.9252	0.885544	0.813719	0.544215	0.958447	0.00348768	0.00849704	0.360377	0.000546842	0.921823	0.0058013	0.000988456	0.00343408	0.000223426	0.016	0.999991	0.00662885	0.0150315	0.540565	0.00115652	0.999965	0.0982526	0.0170519	0.0279793	0.00885651	0.0575428	40	14	14	14	21	8	7	8	8	15	19	1.40115	1.6019
MRPL9	mitochondrial ribosomal protein L9	coding	red	-0.0438408	-0.890682	-0.872998	-0.248343	-0.812087	0.168031	0.915254	0.919498	0.840782	0.813392	0.609685	0.78823	1.93938e-05	4.58285e-05	0.391936	7.80562e-06	0.690822	0.00383482	0.00122676	0.00892399	0.0002258	0.00558036	0.999991	8.21006e-05	0.000172265	0.56979	2.86342e-05	0.999965	0.0982526	0.0188029	0.0468426	0.00888822	0.0278237	40	14	14	14	21	8	7	8	8	15	19	-0.370687	-0.29755
CDC42BPB	CDC42 binding protein kinase beta	coding	blue	0.0240509	0.747799	0.573446	0.347266	0.646012	-0.611106	0.890003	0.885732	0.907074	0.813326	0.567659	0.882888	0.00210351	0.0320373	0.223787	0.00155839	0.107488	0.00725816	0.00341766	0.00186889	0.000226278	0.0112398	0.999991	0.00424632	0.0493377	0.40253	0.00297807	0.999965	0.0982526	0.0314998	0.0212723	0.00888822	0.0449383	40	14	14	14	21	8	7	8	8	15	19	1.66462	1.48688
PLPBP	pyridoxal phosphate binding protein	coding	steelblue	0.0256152	-0.487481	0.754439	-0.901275	0.116019	0.273829	0.808949	0.865587	0.900436	0.813319	0.780459	0.875329	0.0770376	0.00182077	1.07735e-05	0.616507	0.511659	0.0275656	0.00547543	0.00228689	0.000226335	8.06652e-05	0.999991	0.106802	0.00383536	0.00878121	0.666188	0.999965	0.120325	0.0410414	0.0229288	0.00888822	0.00146937	40	14	14	14	21	8	7	8	8	15	19	0.426968	0.425711
CYP27A1	cytochrome P450 family 27 subfamily A member 1	coding	tan	0.0225687	0.93538	0.945694	-0.527255	0.891234	-0.0233662	-0.784782	-0.890547	-0.844918	-0.812913	-0.777202	0.89006	9.13661e-07	3.29238e-07	0.052688	5.99001e-08	0.956204	0.0366143	0.00301492	0.00827356	0.000229309	9.03316e-05	0.999991	7.31681e-06	3.63282e-06	0.163937	1.46034e-06	0.999965	0.142674	0.0295707	0.0449293	0.00893082	0.00158425	40	14	14	14	21	8	7	8	8	15	19	0.203338	0.158387
PLBD1	phospholipase B domain containing 1	coding	blue	0.0263128	0.906375	0.900966	-0.636593	0.853511	0.657079	0.812914	0.911731	0.970979	0.812898	0.65393	0.871962	7.92619e-06	1.09695e-05	0.0143679	8.69617e-07	0.0766642	0.0262169	0.00160755	5.97802e-05	0.000229418	0.00238934	0.999991	4.00266e-05	5.49345e-05	0.0780757	5.59608e-06	0.999965	0.11735	0.0215561	0.00524107	0.00893082	0.0156464	40	14	14	14	21	8	7	8	8	15	19	-0.781558	-0.77025
DGKA	diacylglycerol kinase alpha	coding	blue	0.000840887	0.474464	0.0731166	0.33437	0.241923	-0.00493819	0.767401	0.923247	0.882813	0.812882	0.52456	0.995891	0.0864943	0.803823	0.242615	0.290722	0.990741	0.0440145	0.00106633	0.00367798	0.000229539	0.0211236	0.999991	0.11856	0.83733	0.423213	0.342607	0.999965	0.160024	0.017734	0.0290132	0.00893082	0.0694261	40	14	14	14	21	8	7	8	8	15	19	0.867785	0.557822
ELAVL1	ELAV like RNA binding protein 1	coding	brown	-0.0281112	-0.908407	-0.826271	-0.634131	-0.789158	-0.360446	-0.877882	-0.958382	-0.903261	-0.812637	-0.521374	0.86329	6.97995e-06	0.000269969	0.0148704	2.11665e-05	0.380419	0.00936236	0.000174629	0.00210226	0.000231353	0.0220638	0.999991	3.6247e-05	0.000751431	0.0796319	6.60058e-05	0.999965	0.0982526	0.0075883	0.0223715	0.0089738	0.0715279	40	14	14	14	21	8	7	8	8	15	19	0.635118	0.387765
PER1	period circadian regulator 1	coding	blue	0.106794	0.979415	0.980176	-0.436435	0.811318	0.0880228	0.863002	0.878737	0.902449	0.812171	0.679678	0.511899	1.05087e-09	8.39654e-10	0.118716	8.08826e-06	0.835808	0.0123765	0.00406223	0.00215429	0.000234837	0.00136854	0.999991	7.0682e-08	5.52991e-08	0.27087	2.9415e-05	0.999965	0.0982526	0.0341308	0.0224888	0.00899293	0.0105842	40	14	14	14	21	8	7	8	8	15	19	1.47815	2.13456
CTSB	cathepsin B	coding	yellow	-0.0144187	-0.348968	-0.729289	0.668677	-0.499114	-0.25964	-0.81475	-0.933805	-0.923053	-0.812168	-0.806079	0.929634	0.221372	0.0030785	0.00893299	0.0212566	0.534611	0.0256055	0.000689613	0.00107425	0.000234864	3.08612e-05	0.999991	0.27339	0.00604279	0.0599411	0.0320331	0.999965	0.116009	0.014366	0.0160376	0.00899293	0.000754519	40	14	14	14	21	8	7	8	8	15	19	1.82545	1.32863
ABL1	ABL proto-oncogene 1, non-receptor tyrosine kinase	coding	yellow	-0.0115064	-0.754327	-0.786383	0.220405	-0.742964	-0.170034	-0.869022	-0.900758	-0.863244	-0.812164	-0.632774	0.943822	0.00182528	0.000850638	0.448944	0.000114168	0.687277	0.0110988	0.00226534	0.00575618	0.000234889	0.00364158	0.999991	0.00375785	0.00200528	0.62324	0.000285532	0.999965	0.0982526	0.0254766	0.0370581	0.00899293	0.0208455	40	14	14	14	21	8	7	8	8	15	19	1.20972	0.958027
SNAP29	synaptosome associated protein 29	coding	blue	7.29945e-05	0.258532	0.503598	-0.26365	0.372522	0.133243	0.885887	0.941254	0.819944	0.81202	0.681465	0.999643	0.372146	0.0663714	0.362412	0.0962998	0.75311	0.00793801	0.000484782	0.0126938	0.000235978	0.00131402	0.999991	0.432517	0.0944745	0.542139	0.126229	0.999965	0.0982526	0.0121058	0.0580728	0.00899293	0.0103011	40	14	14	14	21	8	7	8	8	15	19	0.266768	0.238012
DAPK3	death associated protein kinase 3	coding	yellow	-0.00974968	-0.0337385	-0.472541	0.583243	-0.25129	-0.586326	-0.8725	-0.945277	-0.878666	-0.811994	-0.78853	0.952388	0.908842	0.0879574	0.0285743	0.271858	0.126611	0.0103968	0.000393054	0.00406915	0.000236176	6.04401e-05	0.999991	0.924934	0.121607	0.114596	0.322571	0.999965	0.0982526	0.0110048	0.0306276	0.00899293	0.0012112	40	14	14	14	21	8	7	8	8	15	19	0.419021	0.560789
NEDD1	NEDD1 gamma-tubulin ring complex targeting factor	coding	brown	-0.0190547	-0.820894	-0.806935	-0.336722	-0.794852	-0.00567861	-0.869057	-0.901239	-0.861105	-0.811883	-0.558363	0.907096	0.00032016	0.000486316	0.239112	1.67149e-05	0.989353	0.0110916	0.00223336	0.00602036	0.000237009	0.0129676	0.999991	0.000846595	0.00124483	0.419009	5.40287e-05	0.999965	0.0982526	0.0253054	0.0377643	0.00899293	0.0496442	40	14	14	14	21	8	7	8	8	15	19	-0.217344	0.18608
CYYR1	cysteine and tyrosine rich 1	coding	blue	0.0164654	0.938309	0.885848	0.231273	0.876694	0.0697309	0.835096	0.923973	0.93825	0.811791	0.752665	0.919677	6.96178e-07	2.48727e-05	0.426299	1.86019e-07	0.869678	0.0193663	0.00103691	0.00056171	0.000237713	0.000200429	0.999991	5.97635e-06	0.00010604	0.601558	2.2505e-06	0.999965	0.103087	0.017474	0.0122674	0.00899293	0.00267627	40	14	14	14	21	8	7	8	8	15	19	1.14543	1.45899
RRBP1	ribosome binding protein 1	coding	black	-0.00152298	0.569458	0.793884	-0.748396	0.66373	-0.494552	-0.874098	-0.895973	-0.863963	-0.811457	-0.48336	0.992558	0.0335328	0.000698553	0.00207677	0.00103589	0.212819	0.0100832	0.00259936	0.00566907	0.000240258	0.0360321	0.999991	0.0507689	0.00169251	0.0276294	0.00206184	0.999965	0.0982526	0.0272538	0.0367623	0.00899293	0.10038	40	14	14	14	21	8	7	8	8	15	19	1.83388	1.62361
SVIL	supervillin	coding	grey60	0.00185654	0.672516	0.564238	0.391652	0.578067	0.271582	-0.846807	-0.899693	-0.981312	-0.81127	-0.841443	0.990929	0.00840853	0.0355674	0.166089	0.00605546	0.515268	0.0162161	0.0023371	1.60893e-05	0.000241693	6.33459e-06	0.999991	0.0145393	0.0542325	0.335561	0.0102382	0.999965	0.0987353	0.0258842	0.00344828	0.00899293	0.00026349	40	14	14	14	21	8	7	8	8	15	19	1.8454	1.33969
CDR2L	cerebellar degeneration related protein 2 like	coding	lightcyan	0.00813326	-0.561373	-0.391892	-0.294847	-0.461493	0.129531	0.872489	0.922133	0.961021	0.811237	0.820098	0.960275	0.0367224	0.165807	0.306146	0.0352159	0.759833	0.0103991	0.00111247	0.000143763	0.000241949	1.71603e-05	0.999991	0.0550575	0.21392	0.488785	0.0507592	0.999965	0.0982526	0.0180349	0.00707348	0.00899293	0.00050699	40	14	14	14	21	8	7	8	8	15	19	0.750918	0.454481
FBXO8	F-box protein 8	coding	blue	0.0287212	0.82368	0.789631	0.445733	0.815627	0.314365	0.772383	0.884814	0.905657	0.811224	0.670421	0.860353	0.000293287	0.000781843	0.110183	6.61207e-06	0.448249	0.0418162	0.00349818	0.00195355	0.00024205	0.00168222	0.999991	0.000784228	0.0018636	0.25926	2.49879e-05	0.999965	0.155382	0.0318532	0.0215645	0.00899293	0.0122674	40	14	14	14	21	8	7	8	8	15	19	-0.455653	-0.0888603
PLPP3	phospholipid phosphatase 3	coding	blue	0.0155879	0.943848	0.973401	-0.425139	0.89137	-0.0411714	0.868028	0.965484	0.977208	0.811211	0.65918	0.923944	4.00711e-07	4.82881e-09	0.129672	5.92218e-08	0.922891	0.0113042	0.000100163	2.90978e-05	0.000242148	0.00214161	0.999991	3.9929e-06	1.79101e-07	0.286712	1.46034e-06	0.999965	0.0982526	0.00550246	0.00427839	0.00899293	0.0144739	40	14	14	14	21	8	7	8	8	15	19	1.98261	1.82694
PIK3C2A	phosphatidylinositol-4-phosphate 3-kinase catalytic subunit type 2 alpha	coding	blue	-0.0129733	0.11388	0.725042	-0.561752	0.399195	0.121942	0.796648	0.946321	0.926365	0.811171	0.788686	0.936673	0.698284	0.00334563	0.0365681	0.0730195	0.773615	0.0319922	0.000371272	0.000943814	0.000242463	6.00949e-05	0.999991	0.745428	0.00651055	0.131141	0.0984047	0.999965	0.131601	0.0107326	0.0151	0.00899293	0.00120981	40	14	14	14	21	8	7	8	8	15	19	1.41535	1.61718
RNF13	ring finger protein 13	coding	blue	0.0351794	0.930435	0.952235	-0.637438	0.871705	0.350279	0.811296	0.888251	0.950184	0.811035	0.720083	0.829373	1.40671e-06	1.5463e-07	0.0141985	2.65704e-07	0.394972	0.0267627	0.00320291	0.000297623	0.000243511	0.00050767	0.999991	1.03357e-05	2.06473e-06	0.0774215	2.71574e-06	0.999965	0.118368	0.0305168	0.00933856	0.00899293	0.00525757	40	14	14	14	21	8	7	8	8	15	19	0.37778	0.728392
NDUFB7	NADH:ubiquinone oxidoreductase subunit B7	coding	yellow	-0.0319042	-0.747462	-0.779229	0.368508	-0.611435	-0.0816041	-0.87646	-0.853817	-0.935201	-0.810766	-0.794246	0.845055	0.00211872	0.00101932	0.194808	0.00322893	0.84767	0.00962957	0.0069784	0.000647576	0.000245606	4.88958e-05	0.999991	0.0042736	0.00233884	0.371433	0.00579722	0.999965	0.0982526	0.0470624	0.012873	0.00899293	0.00104143	40	14	14	14	21	8	7	8	8	15	19	0.251475	0.0863954
MORF4L2	mortality factor 4 like 2	coding	brown	-0.0265379	-0.886981	-0.837653	-0.504466	-0.882045	-0.51412	-0.90072	-0.96746	-0.857476	-0.810732	-0.663716	0.870875	2.34865e-05	0.000184529	0.0658284	1.24712e-07	0.192421	0.0056508	8.40472e-05	0.00648616	0.000245867	0.00194509	0.999991	9.53297e-05	0.000547611	0.188392	1.81472e-06	0.999965	0.0982526	0.00507663	0.0391492	0.00899293	0.0135663	40	14	14	14	21	8	7	8	8	15	19	1.30774	1.28966
PMPCA	peptidase, mitochondrial processing subunit alpha	coding	yellow	-0.0635773	-0.952852	-0.95383	-0.361874	-0.515967	-0.364177	-0.84429	-0.957434	-0.93894	-0.8106	-0.825044	0.696727	1.4321e-07	1.26556e-07	0.203587	0.0166517	0.37514	0.0168663	0.000186704	0.000543376	0.000246899	1.37841e-05	0.999991	1.9042e-06	1.78003e-06	0.38133	0.0256624	0.999965	0.0997795	0.00779164	0.0120984	0.00899293	0.000437736	40	14	14	14	21	8	7	8	8	15	19	0.241078	0.111333
MYO10	myosin X	coding	yellow	-0.0185566	-0.878954	-0.917312	0.46464	-0.889729	-0.15344	-0.892138	-0.864632	-0.936146	-0.810457	-0.639044	0.909515	3.4817e-05	3.85403e-06	0.0941494	6.78368e-08	0.716784	0.00691923	0.00558883	0.00062012	0.000248028	0.00322426	0.999991	0.000131343	2.41258e-05	0.234863	1.50755e-06	0.999965	0.0982526	0.0413731	0.0126402	0.00899293	0.0192497	40	14	14	14	21	8	7	8	8	15	19	1.0455	1.05062
ESYT2	extended synaptotagmin 2	coding	blue	0.0178726	0.810625	0.834939	-0.163139	0.778596	0.0298433	0.908935	0.879607	0.916507	0.810396	0.555109	0.912837	0.000436862	0.000202569	0.577353	3.22053e-05	0.944077	0.00457417	0.00397813	0.0013655	0.000248502	0.0136204	0.999991	0.00109736	0.000591429	0.727517	9.45742e-05	0.999965	0.0982526	0.0337834	0.0182524	0.00899293	0.0513967	40	14	14	14	21	8	7	8	8	15	19	1.44035	1.44563
HSPA1B	heat shock protein family A (Hsp70) member 1B	coding	blue	0.0264839	0.937215	0.962063	-0.52902	0.858072	0.723526	0.906859	0.897096	0.871933	0.810259	0.678887	0.871136	7.7171e-07	3.96557e-08	0.0517568	6.56055e-07	0.0424834	0.00483374	0.00251826	0.00475967	0.000249583	0.00139326	0.999991	6.471e-06	7.6204e-07	0.162681	4.73232e-06	0.999965	0.0982526	0.0267367	0.0333996	0.00899293	0.010736	40	14	14	14	21	8	7	8	8	15	19	0.31532	0.42202
OSTF1	osteoclast stimulating factor 1	coding	yellow	-0.0992103	-0.760737	-0.775953	-0.0950764	-0.744402	0.131001	-0.891959	-0.805069	-0.946383	-0.81024	-0.658462	0.542478	0.00158134	0.00110501	0.746461	0.000108915	0.757169	0.00694727	0.0159159	0.000370019	0.000249735	0.00217417	0.999991	0.00332161	0.00249961	0.847231	0.00027375	0.999965	0.0982526	0.0763782	0.0100966	0.00899293	0.0146048	40	14	14	14	21	8	7	8	8	15	19	-0.384107	0.0192784
ARHGAP29	Rho GTPase activating protein 29	coding	yellow	-0.042996	-0.829593	-0.866595	-0.122523	-0.757493	0.0404622	-0.845495	-0.936341	-0.918933	-0.810213	-0.629341	0.79222	0.000242274	6.06769e-05	0.676476	6.99111e-05	0.924216	0.0165532	0.00061453	0.00125225	0.000249948	0.00388827	0.999991	0.000664403	0.000217625	0.800341	0.000185121	0.999965	0.09926	0.0136568	0.0175054	0.00899293	0.0217042	40	14	14	14	21	8	7	8	8	15	19	1.10726	1.45199
ZNF354A	zinc finger protein 354A	coding	blue	0.0144652	0.293487	0.290215	-0.011794	0.288323	0.701422	0.841465	0.82919	0.981552	0.81018	0.687408	0.929408	0.308488	0.314164	0.968081	0.204984	0.0525331	0.0176136	0.0109174	1.54784e-05	0.000250214	0.00114552	0.999991	0.366069	0.374314	0.982661	0.25063	0.999965	0.101101	0.0614457	0.00344828	0.00899293	0.00929126	40	14	14	14	21	8	7	8	8	15	19	-0.535945	-0.400088
PROX1	prospero homeobox 1	coding	blue	0.00794854	0.89007	0.765314	0.465849	0.794034	-0.155415	0.928228	0.969658	0.968905	0.810175	0.868848	0.961176	2.00267e-05	0.0014236	0.0931825	1.72993e-05	0.713256	0.00254937	6.82549e-05	7.34254e-05	0.000250249	1.39222e-06	0.999991	8.42719e-05	0.00310744	0.233284	5.56757e-05	0.999965	0.0982526	0.00484878	0.0056259	0.00899293	8.98195e-05	40	14	14	14	21	8	7	8	8	15	19	0.457828	0.578303
FAM89A	family with sequence similarity 89 member A	coding	salmon	-0.112925	-0.319148	-0.831035	0.616298	-0.503731	-0.101145	-0.844216	-0.853109	-0.84215	-0.810167	-0.622784	0.48782	0.266046	0.000230999	0.0189216	0.0199045	0.811643	0.0168858	0.00707637	0.00870536	0.000250319	0.00439778	0.999991	0.321344	0.000658987	0.0910788	0.0302006	0.999965	0.0997795	0.0474951	0.0461654	0.00899293	0.0235038	40	14	14	14	21	8	7	8	8	15	19	-3.39233	-1.42683
ENDOD1	endonuclease domain containing 1	coding	blue	0.0155998	0.797468	0.830354	-0.305526	0.757384	0.0605261	0.904424	0.905711	0.91337	0.810164	0.651007	0.923887	0.000634032	0.000236272	0.288118	7.0178e-05	0.88679	0.00514902	0.00195025	0.00152158	0.000250337	0.0025373	0.999991	0.00151014	0.000671082	0.469854	0.000185765	0.999965	0.0982526	0.0238831	0.0193566	0.00899293	0.0163611	40	14	14	14	21	8	7	8	8	15	19	0.70856	1.18213
PGF	placental growth factor	coding	yellow	-0.00838412	-0.874956	-0.984748	0.376876	-0.887163	-0.153077	-0.810223	-0.826939	-0.876728	-0.809837	-0.634119	0.95905	4.19328e-05	1.75872e-10	0.184084	8.35353e-08	0.717433	0.027128	0.0113344	0.00426082	0.00025294	0.00354854	0.999991	0.000152675	1.98563e-08	0.35707	1.61694e-06	0.999965	0.119233	0.0629042	0.031361	0.00903885	0.0205832	40	14	14	14	21	8	7	8	8	15	19	-0.919052	-0.851264
NORAD	non-coding RNA activated by DNA damage	noncoding	tan	0.0217413	0.926423	0.86171	0.380622	0.850408	-0.379415	-0.858159	-0.89423	-0.902384	-0.809813	-0.544041	0.894067	1.95197e-06	7.44601e-05	0.179408	1.0478e-06	0.353922	0.0134628	0.0027285	0.0021585	0.000253133	0.0160404	0.999991	1.33709e-05	0.000257324	0.351942	6.3213e-06	0.999965	0.0982526	0.0278488	0.0224954	0.00903885	0.0576224	40	14	14	14	21	8	7	8	8	15	19	1.79756	1.93755
MKNK2	MAPK interacting serine/threonine kinase 2	coding	blue	0.00445932	0.94877	0.894062	0.531714	0.825424	0.196707	0.868996	0.968916	0.921241	0.809735	0.561867	0.978213	2.33593e-07	1.61847e-05	0.0503582	4.09976e-06	0.640577	0.0111041	7.33482e-05	0.00115034	0.00025376	0.0122929	0.999991	2.7274e-06	7.45747e-05	0.160237	1.72517e-05	0.999965	0.0982526	0.00490513	0.0166812	0.00903885	0.0477408	40	14	14	14	21	8	7	8	8	15	19	1.57246	1.54584
MYO6	myosin VI	coding	yellow	-0.0145366	-0.944478	-0.963074	0.810138	-0.89575	-0.0400208	-0.896507	-0.924915	-0.905702	-0.809312	-0.57132	0.929061	3.75011e-07	3.37952e-08	0.000443141	4.07693e-08	0.925041	0.0062548	0.000999581	0.00195084	0.000257167	0.0106124	0.999991	3.77548e-06	6.79397e-07	0.0166145	1.35046e-06	0.999965	0.0982526	0.017127	0.0215633	0.00911767	0.0431895	40	14	14	14	21	8	7	8	8	15	19	0.0949989	0.18608
SYNJ2	synaptojanin 2	coding	red	-0.0380871	-0.802861	-0.809608	0.394882	-0.503734	-0.211735	0.81714	0.858717	0.888284	0.809249	0.655685	0.815505	0.00054604	0.000450061	0.162314	0.0199036	0.614703	0.0248212	0.0063244	0.00320015	0.000257679	0.00230401	0.999991	0.00132833	0.00116476	0.330976	0.0302006	0.999965	0.114549	0.0445038	0.0271401	0.00911767	0.0152535	40	14	14	14	21	8	7	8	8	15	19	1.31083	0.78452
NCF2	neutrophil cytosolic factor 2	coding	blue	0.0400074	0.898488	0.894274	-0.369767	0.867871	-0.242439	0.83292	0.834723	0.83809	0.80912	0.618018	0.806376	1.26529e-05	1.59991e-05	0.193169	3.46041e-07	0.562925	0.0199869	0.00993409	0.00936433	0.000258724	0.00480159	0.999991	5.81801e-05	7.40515e-05	0.369443	3.18232e-06	0.999965	0.10439	0.0582512	0.0480693	0.00911767	0.0250415	40	14	14	14	21	8	7	8	8	15	19	0.120664	-0.745437
CNNM2	cyclin and CBS domain divalent metal cation transport mediator 2	coding	blue	0.0341058	0.868921	0.877976	-0.31906	0.879148	-0.719771	0.873335	0.978418	0.949034	0.809057	0.850821	0.834507	5.48863e-05	3.64586e-05	0.266185	1.55212e-07	0.0441002	0.0102322	2.47275e-05	0.000318442	0.000259244	3.90156e-06	0.999991	0.000191935	0.000143642	0.446881	2.02127e-06	0.999965	0.0982526	0.00364605	0.00964359	0.00911767	0.000187586	40	14	14	14	21	8	7	8	8	15	19	0.151397	-0.540232
EIF2AK1	eukaryotic translation initiation factor 2 alpha kinase 1	coding	yellow	0.100472	-0.715091	-0.79772	-0.676776	-0.744334	-0.596215	-0.898	-0.928493	-0.863572	-0.809016	-0.704756	0.53733	0.00404331	0.000629686	0.00785471	0.000109158	0.118768	0.00603668	0.000865759	0.00571641	0.000259578	0.000753493	0.999991	0.00756215	0.00154639	0.0562976	0.000274271	0.999965	0.0982526	0.0161264	0.0369337	0.00911767	0.00688931	40	14	14	14	21	8	7	8	8	15	19	0.847266	0.654067
GBP3	guanylate binding protein 3	coding	blue	-0.0774905	0.468784	0.488046	-0.184393	0.533047	0.153592	0.862037	0.854372	0.9506	0.808739	0.84451	0.634596	0.090865	0.0766439	0.528002	0.0128411	0.716511	0.0125889	0.00690232	0.000290329	0.000261842	5.42499e-06	0.999991	0.123893	0.107446	0.687316	0.020264	0.999965	0.0982526	0.0468239	0.00924739	0.00917171	0.000240698	40	14	14	14	21	8	7	8	8	15	19	0.360532	0.741803
UNC13B	unc-13 homolog B	coding	yellow	-0.0213892	-0.909025	-0.886325	-0.0578158	-0.890483	0.164188	-0.912414	-0.846374	-0.902655	-0.808643	-0.596059	0.895773	6.71137e-06	2.42808e-05	0.844359	6.37499e-08	0.697636	0.00415775	0.00805196	0.00214105	0.000262636	0.00707449	0.999991	3.51409e-05	0.000104113	0.908453	1.48751e-06	0.999965	0.0982526	0.0511279	0.0224153	0.00917412	0.0330083	40	14	14	14	21	8	7	8	8	15	19	0.910792	0.824484
RNF144B	ring finger protein 144B	coding	brown	-0.00876806	-0.901349	-0.894292	-0.436727	-0.835994	-0.14953	-0.885078	-0.905282	-0.863246	-0.808476	-0.521771	0.957177	1.07271e-05	1.59834e-05	0.118441	2.36625e-06	0.723782	0.0080758	0.00197632	0.00575599	0.00026402	0.0219449	0.999991	5.10517e-05	7.40057e-05	0.270536	1.13979e-05	0.999965	0.0982526	0.0240525	0.0370581	0.00919705	0.0712677	40	14	14	14	21	8	7	8	8	15	19	0.364886	0.57252
STOX2	storkhead box 2	coding	blue	2.55261e-05	0.874314	0.966096	-0.57417	0.836482	-0.0360811	0.823329	0.937012	0.927326	0.808302	0.796102	0.999875	4.31789e-05	2.03799e-08	0.0317711	2.30484e-06	0.932407	0.0228545	0.000595624	0.000908026	0.00026546	4.55795e-05	0.999991	0.000156491	4.81688e-07	0.121778	1.11871e-05	0.999965	0.110093	0.0134177	0.0148494	0.00922181	0.000997151	40	14	14	14	21	8	7	8	8	15	19	-0.486604	0.117413
EHBP1L1	EH domain binding protein 1 like 1	coding	blue	0.0186637	0.959624	0.963201	-0.467498	0.894384	-0.0152713	0.837931	0.960836	0.958126	0.807928	0.475592	0.908995	5.73291e-08	3.31165e-08	0.0918757	4.58863e-08	0.971371	0.0185745	0.000145798	0.000177835	0.000268584	0.0395822	0.999991	9.88986e-07	6.73245e-07	0.23172	1.35886e-06	0.999965	0.102004	0.0068332	0.00759529	0.00930478	0.107063	40	14	14	14	21	8	7	8	8	15	19	1.318	1.36852
SENCR	smooth muscle and endothelial cell enriched migration/differentiation-associated lncRNA	noncoding	blue	0.004469	0.700171	0.688365	-0.283147	0.654386	0.14504	0.847042	0.97577	0.977393	0.807505	0.680548	0.978166	0.00529781	0.00649045	0.326625	0.00128896	0.73184	0.0161562	3.49182e-05	2.83973e-05	0.000272155	0.00134176	0.999991	0.00962374	0.0117936	0.508328	0.00251526	0.999965	0.0986598	0.00408834	0.00427839	0.00935639	0.0104412	40	14	14	14	21	8	7	8	8	15	19	-0.440708	-0.523003
FADS3	fatty acid desaturase 3	coding	yellow	-0.0389422	-0.1465	-0.188867	0.0929122	-0.150437	-0.40307	-0.827136	-0.983531	-0.833851	-0.807314	-0.702739	0.811437	0.617245	0.517858	0.752065	0.515113	0.32211	0.0216904	1.10306e-05	0.0100851	0.000273778	0.00079227	0.999991	0.671461	0.577555	0.850234	0.569221	0.999965	0.107629	0.00330387	0.0503651	0.00935639	0.00714569	40	14	14	14	21	8	7	8	8	15	19	1.55989	1.14402
ROBO4	roundabout guidance receptor 4	coding	yellow	-0.0095022	-0.457105	-0.69417	0.224284	-0.551158	-0.222296	-0.846462	-0.922019	-0.899715	-0.807302	-0.656069	0.953595	0.100331	0.00588043	0.440794	0.00960668	0.596722	0.0163044	0.00111727	0.00233557	0.000273881	0.00228568	0.999991	0.13537	0.0108063	0.615078	0.0155779	0.999965	0.0989261	0.0180895	0.0230799	0.00935639	0.015156	40	14	14	14	21	8	7	8	8	15	19	1.98778	1.6533
SLC35E3	solute carrier family 35 member E3	coding	yellow	-0.00111341	-0.623434	-0.668468	0.131464	-0.608576	0.0754077	-0.694829	-0.865074	-0.853093	-0.807129	-0.763986	0.99456	0.0172112	0.00896231	0.654164	0.00341681	0.859146	0.0831482	0.00553617	0.00707861	0.00027536	0.000140382	0.999991	0.0277349	0.0157422	0.784587	0.00610268	0.999965	0.241315	0.0412035	0.0413931	0.00935639	0.00212337	40	14	14	14	21	8	7	8	8	15	19	-0.384107	-0.386305
PLPP1	phospholipid phosphatase 1	coding	blue	0.0137642	0.957945	0.967011	-0.338549	0.883017	-0.158997	0.890218	0.902339	0.957712	0.806984	0.863797	0.932821	7.29379e-08	1.73292e-08	0.236412	1.15744e-07	0.706867	0.00722351	0.00216141	0.000183114	0.000276611	1.88545e-06	0.999991	1.17935e-06	4.32342e-07	0.416529	1.79095e-06	0.999965	0.0982526	0.0248923	0.00759529	0.00935639	0.000114622	40	14	14	14	21	8	7	8	8	15	19	0.494471	0.501823
UBE2F	ubiquitin conjugating enzyme E2 F (putative)	coding	red	0.00132584	-0.293274	-0.49149	0.37108	-0.365818	0.109777	0.910099	0.824273	0.913002	0.806979	0.615399	0.993522	0.308856	0.0742781	0.19147	0.102924	0.795816	0.00443225	0.0118411	0.00154061	0.000276648	0.00503602	0.999991	0.366368	0.104447	0.367303	0.134214	0.999965	0.0982526	0.0645669	0.0194176	0.00935639	0.0258395	40	14	14	14	21	8	7	8	8	15	19	-0.502643	-0.676452
CAPN2	calpain 2	coding	red	-0.0285573	-0.857943	-0.874758	0.236706	-0.898398	0.0171889	0.909659	0.907539	0.895149	0.806969	0.588491	0.861142	8.67473e-05	4.23134e-05	0.415201	3.22706e-08	0.967777	0.00448558	0.00184161	0.00265993	0.000276735	0.00803558	0.999991	0.000281695	0.000161209	0.59184	1.27838e-06	0.999965	0.0982526	0.0231253	0.0246228	0.00935639	0.0360063	40	14	14	14	21	8	7	8	8	15	19	1.70712	1.18862
SEMA3F	semaphorin 3F	coding	blue	0.0135735	0.75374	0.848047	-0.332619	0.770159	-0.283409	0.891315	0.841013	0.904494	0.806815	0.604584	0.93375	0.00184904	0.000127048	0.245245	4.43288e-05	0.496378	0.00704878	0.00888691	0.00202483	0.000278064	0.00610604	0.999991	0.00379749	0.000400828	0.425803	0.000125372	0.999965	0.0982526	0.0543137	0.021897	0.00935639	0.0296167	40	14	14	14	21	8	7	8	8	15	19	1.89424	1.69462
PIK3C2B	phosphatidylinositol-4-phosphate 3-kinase catalytic subunit type 2 beta	coding	blue	0.00817568	0.876471	0.725465	0.194232	0.740395	-0.350098	0.842642	0.965501	0.935094	0.806771	0.547182	0.960068	3.91087e-05	0.00331824	0.50581	0.000124099	0.395233	0.0173001	0.000100014	0.00065075	0.000278441	0.0153213	0.999991	0.000144472	0.00646122	0.669525	0.000307754	0.999965	0.100442	0.00550246	0.0128977	0.00935639	0.0558806	40	14	14	14	21	8	7	8	8	15	19	1.55777	1.37572
XPO6	exportin 6	coding	brown	-0.0637433	-0.792616	-0.646656	-0.801361	-0.733642	0.0700593	-0.852133	-0.937386	-0.841422	-0.806765	-0.807752	0.695973	0.000722599	0.0124475	0.000569465	0.000153837	0.869068	0.0148879	0.000585238	0.00882137	0.000278496	2.88446e-05	0.999991	0.00168958	0.0211273	0.0176753	0.000372159	0.999965	0.0982526	0.013286	0.0464582	0.00935639	0.000728023	40	14	14	14	21	8	7	8	8	15	19	1.21926	0.881748
IRAK3	interleukin 1 receptor associated kinase 3	coding	blue	0.0124341	0.945081	0.990125	-0.746146	0.90998	0.0878307	0.802304	0.857504	0.918082	0.806718	0.760212	0.9393	3.51677e-07	1.3105e-11	0.00217905	1.07056e-08	0.836162	0.0299112	0.00648245	0.00129125	0.000278901	0.000158411	0.999991	3.60662e-06	4.04178e-09	0.0280021	1.19401e-06	0.999965	0.125885	0.0453126	0.0177477	0.00935639	0.00230773	40	14	14	14	21	8	7	8	8	15	19	1.20852	1.33546
CD59	CD59 molecule (CD59 blood group)	coding	blue	0.0163768	0.268856	0.548299	-0.331976	0.396708	-0.0909626	0.878516	0.892775	0.965354	0.806698	0.831022	0.920108	0.352655	0.0423462	0.246215	0.0749913	0.830384	0.0092445	0.00283947	0.000101288	0.00027908	1.04815e-05	0.999991	0.412404	0.0634597	0.426959	0.100815	0.999965	0.0982526	0.0285868	0.00602564	0.00935639	0.000360159	40	14	14	14	21	8	7	8	8	15	19	2.71191	2.40392
CACTIN	cactin, spliceosome C complex subunit	coding	yellow	-0.015691	-0.772452	-0.944113	0.399035	-0.769	-0.0819558	-0.878924	-0.830581	-0.907227	-0.806618	-0.663736	0.923443	0.0012028	3.89735e-07	0.157544	4.62703e-05	0.84702	0.00916918	0.0106646	0.00185988	0.000279775	0.00194425	0.999991	0.00261298	4.1e-06	0.324295	0.000129962	0.999965	0.0982526	0.0606631	0.0212642	0.00935639	0.0135663	40	14	14	14	21	8	7	8	8	15	19	-0.12888	-0.263084
NAB1	NGFI-A binding protein 1	coding	blue	0.0178543	0.938161	0.908336	0.337243	0.858466	0.338628	0.913373	0.902787	0.938173	0.806403	0.562367	0.912926	7.06035e-07	7.01131e-06	0.238339	6.39969e-07	0.41194	0.00404698	0.00213253	0.00056378	0.000281645	0.012199	0.999991	6.02417e-06	3.84538e-05	0.418526	4.66152e-06	0.999965	0.0982526	0.0247848	0.0122702	0.00935639	0.047522	40	14	14	14	21	8	7	8	8	15	19	0.555685	0.845414
PFKL	phosphofructokinase, liver type	coding	orange	-0.00724699	0.315422	-0.318449	0.600412	0.00522043	-0.380265	-0.921084	-0.97379	-0.830938	-0.806358	-0.717705	0.964601	0.27198	0.267154	0.0231888	0.982082	0.352754	0.00321926	4.41338e-05	0.0106003	0.000282034	0.000540632	0.999991	0.327697	0.325136	0.101602	0.984886	0.999965	0.0982526	0.00439426	0.0521792	0.00935639	0.00547341	40	14	14	14	21	8	7	8	8	15	19	1.5949	1.38598
GID4	GID complex subunit 4 homolog	coding	blue	0.0944616	0.764183	0.520733	0.437596	0.627566	0.459326	0.712261	0.835686	0.869548	0.806292	0.72307	0.562062	0.00146133	0.0562354	0.117626	0.00232295	0.252233	0.0725272	0.00976888	0.0050212	0.00028261	0.000468694	0.999991	0.0031025	0.0817446	0.269687	0.00428	0.999965	0.221416	0.0576692	0.0344696	0.00935639	0.00495124	40	14	14	14	21	8	7	8	8	15	19	0.0333059	-0.0559929
SNRK	SNF related kinase	coding	darkgrey	0.0107035	0.717277	0.228626	0.70722	0.492038	-0.228822	-0.880112	-0.904848	-0.869141	-0.806131	-0.587716	0.947736	0.00388105	0.43176	0.00467201	0.0234701	0.5857	0.00895195	0.00200296	0.00506663	0.000284022	0.00813973	0.999991	0.00728777	0.493367	0.0419288	0.035017	0.999965	0.0982526	0.0241381	0.0345969	0.00935639	0.0363571	40	14	14	14	21	8	7	8	8	15	19	1.41271	1.91027
TMEM203	transmembrane protein 203	coding	yellow	-0.0193784	-0.791398	-0.853524	0.523236	-0.80248	-0.732801	-0.889295	-0.852419	-0.911905	-0.806088	-0.413245	0.905525	0.00074633	0.000103208	0.0548539	1.20412e-05	0.0386453	0.00737261	0.00717265	0.00159829	0.000284399	0.0786467	0.999991	0.00173672	0.000338276	0.167747	4.09522e-05	0.999965	0.0982526	0.0479884	0.019853	0.00935639	0.175437	40	14	14	14	21	8	7	8	8	15	19	-0.260836	-0.414185
RNF115	ring finger protein 115	coding	blue	0.0127785	0.588155	0.840646	-0.638172	0.691904	0.152678	0.844351	0.864546	0.915036	0.806083	0.760267	0.937622	0.0269468	0.000166168	0.0140526	0.000511152	0.718147	0.0168503	0.00559905	0.00143733	0.000284449	0.000158133	0.999991	0.0416098	0.000501001	0.0770314	0.00108905	0.999965	0.0997795	0.0413731	0.0187874	0.00935639	0.00230634	40	14	14	14	21	8	7	8	8	15	19	0.535907	0.759244
DNM3OS	DNM3 opposite strand/antisense RNA	noncoding	blue	0.00238701	0.923125	0.854387	0.242352	0.862593	-0.316718	0.818609	0.919375	0.925918	0.805942	0.706363	0.988337	2.52092e-06	9.98086e-05	0.403826	4.91335e-07	0.444671	0.0243462	0.00123227	0.00096079	0.000285691	0.000723748	0.999991	1.64569e-05	0.000328239	0.581526	3.92975e-06	0.999965	0.113225	0.0188417	0.0151088	0.00935639	0.00672431	40	14	14	14	21	8	7	8	8	15	19	-0.440708	-0.0247799
SGMS1	sphingomyelin synthase 1	coding	blue	0.00842735	0.4941	0.780472	-0.557412	0.61392	-0.0906753	0.854744	0.861385	0.913028	0.805908	0.665234	0.958839	0.0725201	0.000988254	0.0383642	0.00307266	0.830913	0.0142603	0.00598544	0.00153928	0.000285992	0.00188277	0.999991	0.10125	0.00227788	0.135017	0.00554104	0.999965	0.0982526	0.042883	0.0194176	0.00935639	0.0132265	40	14	14	14	21	8	7	8	8	15	19	0.225168	0.28593
BACE1	beta-secretase 1	coding	blue	0.0153249	0.0443705	-0.248087	0.242289	-0.0692741	-0.349239	0.792468	0.918562	0.873069	0.805867	0.627895	0.925224	0.880281	0.39244	0.403953	0.765418	0.396474	0.0335809	0.00126916	0.00463822	0.000286352	0.00399629	0.999991	0.902048	0.454266	0.581546	0.801284	0.999965	0.135578	0.0191282	0.0329341	0.00935639	0.0220861	40	14	14	14	21	8	7	8	8	15	19	0.581163	0.257626
ALDH1A2	aldehyde dehydrogenase 1 family member A2	coding	blue	0.00730149	0.846232	0.914379	-0.579469	0.828682	0.0429593	0.798436	0.863725	0.839769	0.805603	0.609183	0.964335	0.000135864	4.71998e-06	0.0298733	3.47449e-06	0.91955	0.0313261	0.00569779	0.00908809	0.000288695	0.00563037	0.999991	0.00040973	2.82328e-05	0.117899	1.51761e-05	0.999965	0.129702	0.04184	0.0473697	0.00936056	0.0280189	40	14	14	14	21	8	7	8	8	15	19	2.05851	1.7488
IGF2BP2	insulin like growth factor 2 mRNA binding protein 2	coding	yellow	-0.0367722	-0.704753	-0.721849	-0.253664	-0.715161	-0.0214734	-0.879242	-0.956016	-0.920345	-0.805572	-0.590347	0.82177	0.00488407	0.00355832	0.381533	0.000268531	0.95975	0.00911071	0.000205776	0.00118923	0.000288973	0.00779068	0.999991	0.008948	0.00688311	0.560271	0.000611706	0.999965	0.0982526	0.00820831	0.0169726	0.00936056	0.035268	40	14	14	14	21	8	7	8	8	15	19	0.692933	0.693539
KMT2E	lysine methyltransferase 2E (inactive)	coding	blue	0.021077	0.874065	0.876029	-0.127487	0.845061	0.00860499	0.892078	0.912265	0.950267	0.805531	0.498165	0.897286	4.36702e-05	3.9916e-05	0.664057	1.43101e-06	0.983866	0.00692856	0.0015792	0.000296165	0.000289342	0.029952	0.999991	0.000158045	0.000154166	0.791977	7.85721e-06	0.999965	0.0982526	0.021449	0.00931593	0.00936056	0.08829	40	14	14	14	21	8	7	8	8	15	19	1.34397	1.52054
NT5C2	5'-nucleotidase, cytosolic II	coding	tan	0.00944761	0.496681	0.705704	-0.452182	0.566869	0.609455	-0.830051	-0.901429	-0.90098	-0.805437	-0.528015	0.953861	0.0708109	0.00480144	0.104518	0.00737159	0.108708	0.0208218	0.00222082	0.0022505	0.000290178	0.0201397	0.999991	0.0991259	0.00902546	0.25082	0.0122424	0.999965	0.105612	0.0252085	0.022813	0.00936056	0.0672476	40	14	14	14	21	8	7	8	8	15	19	0.31532	0.23301
CSNK1D	casein kinase 1 delta	coding	skyblue	-0.0149578	0.339152	0.622951	-0.440286	0.44728	-0.67465	-0.846005	-0.862437	-0.937875	-0.805437	-0.755805	0.927011	0.235524	0.0173233	0.115129	0.0420519	0.0664562	0.0164216	0.00585497	0.000571851	0.000290181	0.000181919	0.999991	0.288669	0.028327	0.266421	0.0596395	0.999965	0.0989261	0.0424985	0.0123401	0.00936056	0.00251132	40	14	14	14	21	8	7	8	8	15	19	1.0393	1.06785
MZT1	mitotic spindle organizing protein 1	coding	brown	-0.0116397	-0.833235	-0.726735	-0.330995	-0.757673	-0.402337	-0.89167	-0.930201	-0.947534	-0.805056	-0.692771	0.943172	0.000214608	0.00323707	0.247698	6.94734e-05	0.323075	0.00699272	0.000806246	0.000347006	0.000293608	0.0010094	0.999991	0.000600778	0.00632068	0.42818	0.000184286	0.999965	0.0982526	0.0156846	0.00986043	0.00943463	0.00849789	40	14	14	14	21	8	7	8	8	15	19	-1.22506	-0.698605
SDAD1	SDA1 domain containing 1	coding	darkgreen	0.0144035	-0.510677	-0.114319	-0.580007	-0.277444	-0.462682	0.886034	0.921146	0.915235	0.805016	0.593246	0.929709	0.0620372	0.69717	0.0296857	0.223361	0.24833	0.0079131	0.00115442	0.00142744	0.000293969	0.00742013	0.999991	0.0881417	0.743754	0.117485	0.270728	0.999965	0.0982526	0.0183794	0.0187435	0.00943463	0.0340696	40	14	14	14	21	8	7	8	8	15	19	0.276769	0.464934
SEC61G	SEC61 translocon subunit gamma	coding	brown	-0.0126137	-0.801086	-0.663212	-0.235821	-0.708955	-0.0778327	-0.852215	-0.95013	-0.848435	-0.804823	-0.800997	0.938425	0.000573847	0.00972283	0.416998	0.00032074	0.854652	0.014868	0.000298595	0.00774487	0.000295717	3.77435e-05	0.999991	0.00138452	0.0169603	0.593266	0.00071796	0.999965	0.0982526	0.0096615	0.0431427	0.00945709	0.000869339	40	14	14	14	21	8	7	8	8	15	19	-0.260836	0.164025
AHDC1	AT-hook DNA binding motif containing 1	coding	blue	0.0156374	0.758121	0.7618	-0.192334	0.692176	0.124457	0.834596	0.80167	0.877483	0.804773	0.615731	0.923704	0.00167755	0.00154353	0.510059	0.000507498	0.769042	0.0195079	0.0167171	0.00418544	0.000296165	0.00500584	0.999991	0.0034941	0.00333354	0.672333	0.00108218	0.999965	0.103294	0.0785536	0.0310652	0.00945709	0.0257313	40	14	14	14	21	8	7	8	8	15	19	0.419021	0.651515
CLIC2	chloride intracellular channel 2	coding	blue	0.00545496	0.929915	0.949925	-0.842364	0.824259	0.00706084	0.741694	0.830549	0.878124	0.804316	0.676006	0.97335	1.46932e-06	2.04242e-07	0.000156323	4.34605e-06	0.986761	0.056349	0.0106704	0.00412223	0.000300354	0.00148654	0.999991	1.06962e-05	2.52457e-06	0.0125943	1.80381e-05	0.999965	0.18834	0.0606689	0.0309167	0.00956669	0.0112326	40	14	14	14	21	8	7	8	8	15	19	0.581163	0.814732
MAP3K12	mitogen-activated protein kinase kinase kinase 12	coding	blue	0.00610221	0.780467	0.512528	0.566505	0.640626	0.226019	0.865185	0.97196	0.928766	0.803979	0.773801	0.97019	0.000988382	0.0609384	0.0346727	0.00175563	0.590427	0.0119039	5.39607e-05	0.000856064	0.000303462	0.000101463	0.999991	0.00220658	0.0877944	0.127484	0.00332435	0.999965	0.0982526	0.00464352	0.0146878	0.00961839	0.00169343	40	14	14	14	21	8	7	8	8	15	19	0.762875	0.847282
TADA3	transcriptional adaptor 3	coding	yellow	-0.0145683	-0.756127	-0.753325	-0.0462162	-0.739744	-0.195565	-0.872247	-0.931505	-0.878924	-0.803789	-0.537497	0.928906	0.00175396	0.00186596	0.875336	0.000126732	0.642557	0.010447	0.000762662	0.00404407	0.000305234	0.0176253	0.999991	0.00362702	0.00392271	0.925228	0.00031346	0.999965	0.0982526	0.0151395	0.0305662	0.00961839	0.0614643	40	14	14	14	21	8	7	8	8	15	19	0.319983	0.23301
MTERF2	mitochondrial transcription termination factor 2	coding	blue	0.0227749	0.919874	0.856327	0.562326	0.850771	0.414438	0.875867	0.905934	0.796636	0.803783	0.623747	0.889062	3.20909e-06	9.25004e-05	0.036335	1.02542e-06	0.307323	0.00974232	0.0019368	0.0179498	0.000305285	0.00431975	0.999991	1.99601e-05	0.000308701	0.130564	6.22191e-06	0.999965	0.0982526	0.0238238	0.0726003	0.00961839	0.023234	40	14	14	14	21	8	7	8	8	15	19	-0.12888	0.0401869
CPSF6	cleavage and polyadenylation specific factor 6	coding	yellow	-0.0568843	-0.890113	-0.863036	-0.449946	-0.87768	-0.0994988	-0.848319	-0.892311	-0.897378	-0.803695	-0.649958	0.727358	1.99824e-05	7.04913e-05	0.106459	1.73046e-07	0.814667	0.0158323	0.00287539	0.0024982	0.000306109	0.00259218	0.999991	8.417e-05	0.000246262	0.253851	2.1708e-06	0.999965	0.0984887	0.028745	0.0238773	0.00961839	0.0166321	40	14	14	14	21	8	7	8	8	15	19	0.581163	0.774114
BCAR1	BCAR1 scaffold protein, Cas family member	coding	brown	-0.0242471	-0.963622	-0.933466	-0.624062	-0.883936	-0.309849	-0.851852	-0.895245	-0.886968	-0.80368	-0.622682	0.881939	3.09335e-08	1.08394e-06	0.0170666	1.07785e-07	0.455146	0.0149564	0.00265282	0.00331114	0.00030625	0.00440613	0.999991	6.41236e-07	8.84855e-06	0.086116	1.7363e-06	0.999965	0.0983513	0.0274977	0.0275	0.00961839	0.0235384	40	14	14	14	21	8	7	8	8	15	19	1.36895	1.49547
PNPO	pyridoxamine 5'-phosphate oxidase	coding	red	-0.026719	-0.703663	-0.558878	-0.52472	-0.613879	0.162558	0.852889	0.898289	0.76098	0.803572	0.641795	0.870002	0.00498008	0.0377504	0.0540471	0.00307521	0.70053	0.0147046	0.00243394	0.028311	0.00030726	0.00305406	0.999991	0.00910016	0.0571271	0.166405	0.00554485	0.999965	0.0982526	0.0262157	0.0996085	0.00961839	0.0185243	40	14	14	14	21	8	7	8	8	15	19	0.26171	-0.132556
ZNF704	zinc finger protein 704	coding	darkgrey	-0.00677788	0.870143	0.435274	0.809798	0.595552	-0.465829	-0.918525	-0.928296	-0.868065	-0.803568	-0.487557	0.966891	5.20303e-05	0.119812	0.000447572	0.00439213	0.244699	0.00348165	0.000872812	0.00518834	0.000307302	0.0342194	0.999991	0.000183726	0.160133	0.0166145	0.00763941	0.999965	0.0982526	0.0161829	0.0349529	0.00961839	0.0970624	40	14	14	14	21	8	7	8	8	15	19	0.487304	0.705375
CSNK1E	casein kinase 1 epsilon	coding	yellow	-0.0456724	-0.726852	-0.815454	0.527459	-0.77544	0.0152198	-0.864518	-0.877097	-0.889879	-0.803212	-0.520086	0.779597	0.00322962	0.000378338	0.0525797	3.63518e-05	0.971467	0.0120472	0.00422389	0.00306882	0.000310651	0.0224534	0.999991	0.00618391	0.00100422	0.163784	0.000105139	0.999965	0.0982526	0.034932	0.0267462	0.0096992	0.072282	40	14	14	14	21	8	7	8	8	15	19	0.666035	0.767785
ENSA	endosulfine alpha	coding	blue	-0.0065167	0.637511	0.885246	-0.757062	0.693124	-0.243678	0.741364	0.845047	0.856267	0.803095	0.668465	0.968166	0.0141839	2.56346e-05	0.00171781	0.000494904	0.560868	0.0565182	0.00825378	0.00664633	0.000311753	0.00175567	0.999991	0.0233323	0.000108663	0.0253133	0.00105836	0.999965	0.188618	0.0519766	0.0397349	0.00970929	0.0126498	40	14	14	14	21	8	7	8	8	15	19	0.929448	0.956465
ACO1	aconitase 1	coding	brown	-0.0341716	-0.930453	-0.933603	0.212313	-0.835697	-0.448664	-0.810229	-0.900739	-0.852281	-0.803016	-0.731337	0.834192	1.40458e-06	1.07096e-06	0.466179	2.40438e-06	0.264832	0.027126	0.0022666	0.00719203	0.000312509	0.00037374	0.999991	1.03321e-05	8.75959e-06	0.63611	1.15252e-05	0.999965	0.119233	0.0254766	0.0417554	0.00970929	0.00416016	40	14	14	14	21	8	7	8	8	15	19	0.626427	0.367884
ARNTL	aryl hydrocarbon receptor nuclear translocator like	coding	blue	0.0209319	0.683941	0.606113	0.00955883	0.597154	-0.0295309	0.90631	0.856269	0.863506	0.802249	0.56353	0.89799	0.00698749	0.0215819	0.974128	0.00426092	0.944662	0.00490381	0.00664602	0.00572437	0.000319868	0.0119827	0.999991	0.0123438	0.0344835	0.984691	0.00743881	0.999965	0.0982526	0.0458227	0.0369337	0.00991356	0.046954	40	14	14	14	21	8	7	8	8	15	19	-0.260836	-0.00974339
KANK3	KN motif and ankyrin repeat domains 3	coding	blue	0.00933488	0.903987	0.881381	0.604999	0.811536	-0.173354	0.898776	0.856996	0.843087	0.801835	0.755844	0.954411	9.17086e-06	3.10024e-05	0.021889	8.00704e-06	0.681414	0.00592511	0.00654937	0.00855758	0.000323899	0.0001817	0.999991	4.50527e-05	0.000125931	0.0989135	2.91784e-05	0.999965	0.0982526	0.0455046	0.0457805	0.00995427	0.00251132	40	14	14	14	21	8	7	8	8	15	19	0.857606	0.810788
TMEM205	transmembrane protein 205	coding	blue	0.00742202	0.937625	0.921423	0.701461	0.861166	0.0863556	0.843575	0.970912	0.812159	0.801809	0.615331	0.963746	7.42662e-07	2.86409e-06	0.00517861	5.38873e-07	0.838886	0.0170539	6.01949e-05	0.014323	0.000324153	0.00504224	0.999991	6.29421e-06	1.90012e-05	0.0441559	4.15998e-06	0.999965	0.0998883	0.00470968	0.0628922	0.00995427	0.0258481	40	14	14	14	21	8	7	8	8	15	19	0.197765	0.17515
PIK3CD	phosphatidylinositol-4,5-bisphosphate 3-kinase catalytic subunit delta	coding	grey60	0.0360778	0.155595	-0.176571	0.532366	0.0175675	0.199614	-0.842218	-0.909	-0.9565	-0.801661	-0.820691	0.825083	0.595309	0.545946	0.0500237	0.939753	0.635546	0.0174125	0.00175771	0.00019913	0.000325608	1.6721e-05	0.999991	0.651071	0.603926	0.159533	0.951179	0.999965	0.100745	0.0224962	0.00772393	0.00995427	0.000498672	40	14	14	14	21	8	7	8	8	15	19	-0.411798	-0.911822
ZNF22	zinc finger protein 22	coding	yellow	-0.0253838	-0.681819	-0.722645	0.276018	-0.673132	-0.244712	-0.853868	-0.864542	-0.838437	-0.801598	-0.578241	0.876447	0.00723619	0.0035043	0.339471	0.00082509	0.559153	0.0144691	0.00559958	0.00930677	0.000326224	0.00950371	0.999991	0.0127245	0.00679421	0.520885	0.0016798	0.999965	0.0982526	0.0413731	0.0479137	0.00995427	0.0401787	40	14	14	14	21	8	7	8	8	15	19	-0.757201	-0.29755
SEC14L1	SEC14 like lipid binding 1	coding	yellow	-0.0337987	-0.884224	-0.874416	-0.232779	-0.880339	-0.32016	-0.88336	-0.972147	-0.929032	-0.801536	-0.549856	0.835977	2.69733e-05	4.29799e-05	0.423207	1.4196e-07	0.439461	0.00837303	5.28966e-05	0.000846683	0.00032684	0.0147296	0.999991	0.000106687	0.000163305	0.59873	1.94906e-06	0.999965	0.0982526	0.00464352	0.0146645	0.00995427	0.0542705	40	14	14	14	21	8	7	8	8	15	19	0.769945	0.85654
CXorf40B			yellow	-0.0184827	-0.793161	-0.785701	-0.0115398	-0.802455	0.583882	-0.830907	-0.924928	-0.829096	-0.80147	-0.718415	0.909874	0.000712185	0.000865695	0.968768	1.20542e-05	0.128593	0.0205708	0.000999079	0.0109346	0.000327483	0.000530598	0.999991	0.00166956	0.0020366	0.982758	4.09854e-05	0.999965	0.105221	0.017127	0.0530697	0.00995427	0.00541422	40	14	14	14	21	8	7	8	8	15	19	-0.553251	-0.489916
NEK1	NIMA related kinase 1	coding	blue	0.0546468	0.743343	0.758938	-0.439333	0.753128	0.464914	0.830448	0.929574	0.801398	0.801424	0.542163	0.737695	0.00231195	0.001647	0.116009	8.12902e-05	0.245752	0.0207052	0.000827774	0.0167823	0.000327939	0.0164831	0.999991	0.00460533	0.00351558	0.267542	0.000211375	0.999965	0.105444	0.0158263	0.0694411	0.00995427	0.0585991	40	14	14	14	21	8	7	8	8	15	19	-0.147536	0.257626
DNAJB1	DnaJ heat shock protein family (Hsp40) member B1	coding	purple	0.00529748	0.0628484	0.687288	-0.802477	0.353842	0.841441	0.813419	0.834313	0.926741	0.801247	0.238004	0.97412	0.830982	0.00660885	0.000551971	0.115574	0.00881821	0.0260477	0.010005	0.000929729	0.000329699	0.326494	0.999991	0.859813	0.0119846	0.0174281	0.149186	0.748365	0.116841	0.0585352	0.0149729	0.00995427	0.48864	40	14	14	14	21	8	7	8	8	15	19	0.410977	0.622723
FGFRL1	fibroblast growth factor receptor like 1	coding	tan	-0.00812213	0.442156	0.640855	-0.5833	0.533163	-0.232774	-0.898104	-0.972481	-0.88386	-0.801161	-0.710745	0.960329	0.113414	0.0135288	0.0285549	0.0128178	0.579058	0.00602166	5.10326e-05	0.00358322	0.000330555	0.000647631	0.999991	0.151247	0.0227368	0.114555	0.0202348	0.999965	0.0982526	0.00464352	0.0286047	0.00995427	0.00622287	40	14	14	14	21	8	7	8	8	15	19	0.980737	0.851002
DIRC2			blue	-0.00549643	0.844937	0.467747	0.563387	0.61739	0.150694	0.76568	0.881014	0.843778	0.800967	0.73948	0.973148	0.000142455	0.0916794	0.0359078	0.00286514	0.721697	0.0447882	0.00384457	0.00844971	0.000332486	0.000296653	0.999991	0.000425949	0.126146	0.129878	0.0051972	0.999965	0.162417	0.0332778	0.0455636	0.00995427	0.00353884	40	14	14	14	21	8	7	8	8	15	19	-0.176551	-0.114707
ZNF275	zinc finger protein 275	coding	cyan	-0.0108239	-0.0949376	-0.48789	0.358894	-0.270571	0.896526	-0.887766	-0.912156	-0.821452	-0.8009	-0.505579	0.947149	0.74682	0.0767528	0.207611	0.235514	0.00255917	0.00762325	0.00158494	0.0123924	0.000333155	0.0272248	0.999991	0.787815	0.107587	0.385782	0.283869	0.453947	0.0982526	0.0214905	0.057128	0.00995427	0.0826549	40	14	14	14	21	8	7	8	8	15	19	0.00391215	0.0192784
SDCBP	syndecan binding protein	coding	blue	0.0110468	0.324737	0.679348	-0.465879	0.472558	-0.309924	0.857279	0.97629	0.986921	0.800774	0.807497	0.946062	0.257291	0.00753443	0.0931588	0.0305232	0.455032	0.0136658	3.27317e-05	5.53839e-06	0.000334419	2.9145e-05	0.999991	0.312162	0.0134757	0.233284	0.0445379	0.999965	0.0982526	0.0039175	0.00257874	0.00995427	0.000734141	40	14	14	14	21	8	7	8	8	15	19	1.40115	1.64768
ITGBL1	integrin subunit beta like 1	coding	orange	-0.0350819	-0.181794	-0.512967	0.647452	-0.323652	-0.245352	-0.884059	-0.929301	-0.785943	-0.800768	-0.648407	0.829839	0.533935	0.0606798	0.0123044	0.152372	0.558094	0.00825128	0.000837252	0.0207523	0.00033448	0.00267521	0.999991	0.593705	0.087491	0.0714369	0.191259	0.999965	0.0982526	0.0158263	0.0804573	0.00995427	0.016999	40	14	14	14	21	8	7	8	8	15	19	-1.61158	-2.50267
RSU1	Ras suppressor protein 1	coding	red	-0.0178432	-0.408748	0.0563829	-0.53604	-0.158044	-0.276105	0.880744	0.791921	0.910498	0.800765	0.609665	0.91298	0.146752	0.848175	0.0481705	0.493835	0.508013	0.00883755	0.0191542	0.00167424	0.000334508	0.00558234	0.999991	0.189956	0.874953	0.155935	0.549309	0.999965	0.0982526	0.0851337	0.0203565	0.00995427	0.0278237	40	14	14	14	21	8	7	8	8	15	19	0.982436	0.872862
ALS2CL	ALS2 C-terminal like	coding	blue	0.00987357	0.91846	0.943933	-0.288825	0.886589	-0.422064	0.849602	0.939929	0.833361	0.800678	0.47075	0.951784	3.55305e-06	3.97173e-07	0.316591	8.74639e-08	0.297589	0.015511	0.000517785	0.0101707	0.000335381	0.0419277	0.999991	2.16087e-05	4.1575e-06	0.498077	1.61694e-06	0.999965	0.0984578	0.012567	0.0506334	0.00995427	0.111253	40	14	14	14	21	8	7	8	8	15	19	0.897411	1.26065
SH3TC1	SH3 domain and tetratricopeptide repeats 1	coding	yellow	-0.0294894	-0.477977	-0.643699	0.51186	-0.580303	-0.214112	-0.881276	-0.919323	-0.952587	-0.80065	-0.5988	0.856656	0.0838659	0.0129899	0.0613337	0.00581751	0.610641	0.00874188	0.00123463	0.000257079	0.000335669	0.00675038	0.999991	0.115396	0.021942	0.180092	0.00986621	0.999965	0.0982526	0.0188549	0.0085999	0.00995427	0.031874	40	14	14	14	21	8	7	8	8	15	19	0.985821	0.633348
ARHGAP18	Rho GTPase activating protein 18	coding	yellow	-0.0114295	-0.963944	-0.980726	0.552436	-0.798693	0.0575988	-0.927735	-0.862562	-0.804986	-0.800637	-0.46385	0.944197	2.93492e-08	7.10089e-10	0.0405029	1.41948e-05	0.892241	0.00259265	0.00583968	0.0159351	0.000335794	0.045453	0.999991	6.14438e-07	4.82682e-08	0.140396	4.72349e-05	0.999965	0.0982526	0.0424745	0.0672111	0.00995427	0.118286	40	14	14	14	21	8	7	8	8	15	19	-0.0844319	0.0192784
AC019069.1			brown	-0.0311011	-0.8793	-0.885998	0.150111	-0.869455	-0.073721	-0.848051	-0.912416	-0.850122	-0.800605	-0.756849	0.84891	3.42506e-05	2.46856e-05	0.6085	3.10572e-07	0.862273	0.0158999	0.00157123	0.00749913	0.000336119	0.000176099	0.999991	0.000129826	0.000105456	0.751487	2.98873e-06	0.999965	0.0984887	0.0213867	0.0425541	0.00995427	0.00247419	40	14	14	14	21	8	7	8	8	15	19	-1.52927	-1.97716
GRAMD4	GRAM domain containing 4	coding	blue	0.0168792	0.918295	0.852906	0.487153	0.859661	-0.0643844	0.89233	0.913842	0.890493	0.800603	0.673965	0.917665	3.59499e-06	0.000105703	0.077266	5.93316e-07	0.879612	0.0068892	0.00149738	0.00301923	0.000336139	0.00155574	0.999991	2.17513e-05	0.000344754	0.207305	4.44987e-06	0.999965	0.0982526	0.0208528	0.026514	0.00995427	0.0116267	40	14	14	14	21	8	7	8	8	15	19	0.276769	0.0470027
TCF7L2	transcription factor 7 like 2	coding	blue	0.0257649	0.667418	0.718076	-0.0825776	0.701383	-0.12928	0.89536	0.880176	0.850287	0.800392	0.562941	0.874606	0.00911048	0.00382305	0.77898	0.000396025	0.760288	0.00642553	0.00392373	0.00747536	0.000338279	0.0120919	0.999991	0.0156333	0.00735096	0.867905	0.000866691	0.999965	0.0982526	0.0334517	0.0425218	0.00998383	0.0472778	40	14	14	14	21	8	7	8	8	15	19	0.291492	0.262434
SOCS6	suppressor of cytokine signaling 6	coding	blue	0.0198887	0.74109	0.377451	0.650579	0.544848	0.193368	0.878104	0.903586	0.802425	0.800349	0.472332	0.903049	0.00242342	0.18336	0.0117546	0.0106477	0.646371	0.009321	0.00208169	0.0165371	0.000338716	0.0411502	0.999991	0.00480617	0.234059	0.0696234	0.0171123	0.999965	0.0982526	0.0245093	0.0687868	0.00998383	0.109928	40	14	14	14	21	8	7	8	8	15	19	0.0682916	0.399395
MIR4697HG			blue	0.00215804	0.921195	0.974787	-0.730671	0.876968	0.0185528	0.871119	0.930096	0.849853	0.799983	0.612094	0.989456	2.91281e-06	3.51257e-09	0.00299529	1.82327e-07	0.965221	0.0106724	0.000809816	0.00753807	0.000342444	0.0053453	0.999991	1.84254e-05	1.47074e-07	0.0332318	2.23863e-06	0.999965	0.0982526	0.0156982	0.0426674	0.0100702	0.027069	40	14	14	14	21	8	7	8	8	15	19	-0.22795	-0.0247799
FAM43A	family with sequence similarity 43 member A	coding	orange	-0.0106022	0.161469	0.108115	0.647081	-0.00782109	-0.176645	-0.873156	-0.929195	-0.885056	-0.799454	-0.557874	0.94823	0.581308	0.712951	0.012371	0.973159	0.675615	0.0102674	0.000840959	0.00347687	0.000347899	0.013064	0.999991	0.638409	0.757204	0.071593	0.977643	0.999965	0.0982526	0.0158263	0.0280927	0.0101556	0.049902	40	14	14	14	21	8	7	8	8	15	19	1.01875	1.14054
HECTD2	HECT domain E3 ubiquitin protein ligase 2	coding	blue	0.018751	0.852071	0.884748	-0.341544	0.858219	0.42097	0.769401	0.890053	0.889171	0.799397	0.793631	0.908571	0.000109144	2.62809e-05	0.232025	6.49982e-07	0.298977	0.0431247	0.00305472	0.00312666	0.000348491	5.00391e-05	0.999991	0.000339932	0.000110848	0.411207	4.70639e-06	0.999965	0.157726	0.0296273	0.0269839	0.0101556	0.00105457	40	14	14	14	21	8	7	8	8	15	19	-0.0347799	0.429381
CADPS2	calcium dependent secretion activator 2	coding	blue	0.0124945	0.734376	0.803441	-0.367943	0.767599	0.0315608	0.787353	0.93641	0.938346	0.799343	0.797564	0.939006	0.00278091	0.000537207	0.195546	4.87142e-05	0.940863	0.0355834	0.000612573	0.000559142	0.000349047	4.31056e-05	0.999991	0.00543334	0.0013513	0.371832	0.000135383	0.999965	0.140085	0.0136373	0.012248	0.0101556	0.000963022	40	14	14	14	21	8	7	8	8	15	19	0.578032	0.878209
ZNF267	zinc finger protein 267	coding	yellow	0.00509556	-0.779409	-0.860111	0.0232725	-0.758159	0.567892	-0.809455	-0.89514	-0.841869	-0.799219	-0.737483	0.975106	0.00101479	7.94905e-05	0.937057	6.83036e-05	0.141986	0.0273914	0.00266053	0.00875009	0.000350343	0.000314181	0.999991	0.00225756	0.000271591	0.963968	0.000181717	0.999965	0.119988	0.027508	0.0462756	0.0101556	0.00369564	40	14	14	14	21	8	7	8	8	15	19	-0.24969	-0.114707
IL1R1	interleukin 1 receptor type 1	coding	blue	0.00505592	0.907961	0.994564	-0.737122	0.863553	0.338137	0.802222	0.830465	0.90439	0.799198	0.677986	0.975299	7.17943e-06	3.68342e-13	0.00263	4.61482e-07	0.412662	0.0299407	0.0106856	0.0020313	0.000350558	0.0014219	0.999991	3.70849e-05	9.17589e-10	0.030965	3.80903e-06	0.999965	0.125903	0.0607275	0.0218975	0.0101556	0.0108904	40	14	14	14	21	8	7	8	8	15	19	2.4444	2.32804
TUSC2	tumor suppressor 2, mitochondrial calcium regulator	coding	red	-0.023696	-0.760242	-0.646449	-0.288485	-0.6904	0.427862	0.87503	0.863849	0.856671	0.799196	0.6264	0.884605	0.00159918	0.0124848	0.317188	0.000531827	0.29029	0.00990279	0.00568281	0.00659246	0.000350585	0.00411043	0.999991	0.00335406	0.0211776	0.498737	0.00112778	0.999965	0.0982526	0.0417786	0.0395829	0.0101556	0.0225366	40	14	14	14	21	8	7	8	8	15	19	0.0187733	0.141157
DDIT4	DNA damage inducible transcript 4	coding	blue	0.0345806	0.890211	0.859745	0.636462	0.845567	0.936899	0.869966	0.985266	0.921129	0.799072	0.204082	0.832236	1.98801e-05	8.06783e-05	0.0143944	1.39008e-06	0.000598783	0.0109056	7.90793e-06	0.00115515	0.000351876	0.402	0.999991	8.38756e-05	0.000275203	0.0781524	7.72638e-06	0.302865	0.0982526	0.00330387	0.0167127	0.0101556	0.563558	40	14	14	14	21	8	7	8	8	15	19	0.934943	1.90926
FGF2	fibroblast growth factor 2	coding	blue	0.00202504	0.719692	0.868649	-0.295691	0.746632	0.144052	0.877221	0.876607	0.956247	0.799039	0.785252	0.990105	0.00370785	5.55389e-05	0.304698	0.000101181	0.733615	0.00948597	0.00427299	0.000202576	0.000352225	6.80556e-05	0.999991	0.00699266	0.000202156	0.487155	0.000256349	0.999965	0.0982526	0.0351876	0.00776234	0.0101556	0.00131786	40	14	14	14	21	8	7	8	8	15	19	0.657746	0.858375
DCP1A	decapping mRNA 1A	coding	yellow	-0.0259332	-0.794524	-0.420821	-0.633302	-0.610616	0.567946	-0.896094	-0.90894	-0.807069	-0.799006	-0.652361	0.873794	0.000686675	0.134035	0.0150427	0.00328179	0.141939	0.00631597	0.00176106	0.0154558	0.000352573	0.00246784	0.999991	0.00161785	0.177032	0.0800907	0.00588795	0.999965	0.0982526	0.022503	0.0659376	0.0101556	0.0160112	40	14	14	14	21	8	7	8	8	15	19	0.301127	0.46838
AMOTL2	angiomotin like 2	coding	tan	-0.0098674	0.944027	0.917432	0.610978	0.864652	0.524887	-0.880613	-0.982571	-0.893878	-0.798651	-0.53444	0.951814	3.93281e-07	3.82168e-06	0.0202783	4.2929e-07	0.181659	0.00886119	1.30639e-05	0.00275507	0.000356315	0.018407	0.999991	3.93748e-06	2.39827e-05	0.094515	3.65793e-06	0.999965	0.0982526	0.00330387	0.0251537	0.01024	0.0633006	40	14	14	14	21	8	7	8	8	15	19	1.47655	1.50329
AES			orange	-0.0127929	-0.228213	-0.562312	0.524764	-0.409527	0.566688	-0.871014	-0.936218	-0.877455	-0.798531	-0.778512	0.937552	0.432616	0.0363408	0.0540234	0.065243	0.143024	0.0106936	0.000618057	0.0041882	0.000357587	8.63322e-05	0.999991	0.493498	0.0552651	0.166373	0.0888432	0.999965	0.0982526	0.0137111	0.0310652	0.0102475	0.0015354	40	14	14	14	21	8	7	8	8	15	19	1.37738	1.01891
POF1B	POF1B actin binding protein	coding	blue	0.00221923	0.813151	0.966595	-0.794423	0.708938	0.250447	0.844773	0.842343	0.862607	0.798473	0.569666	0.989157	0.000405409	1.86662e-08	0.000688533	0.000320901	0.549679	0.0167405	0.00867488	0.00583409	0.000358195	0.0108922	0.999991	0.00103147	4.53244e-07	0.0183606	0.000718192	0.999965	0.0997795	0.0536138	0.037367	0.0102475	0.0439207	40	14	14	14	21	8	7	8	8	15	19	-0.535945	0.418306
GPBP1	GC-rich promoter binding protein 1	coding	blue	0.0215298	0.769447	0.788954	0.00487407	0.768779	0.798629	0.849095	0.847557	0.864015	0.798257	0.726978	0.895092	0.00129216	0.000795806	0.986806	4.66472e-05	0.0174553	0.0156376	0.00787478	0.00566289	0.000360498	0.000421537	0.999991	0.00278543	0.00189438	0.992299	0.000130817	0.93831	0.0984578	0.0505311	0.0367623	0.01028	0.00454807	40	14	14	14	21	8	7	8	8	15	19	0.652162	0.970386
CXCL11	C-X-C motif chemokine ligand 11	coding	tan	0.0223026	0.851746	0.87186	0.136638	0.809233	0.238951	-0.910334	-0.814667	-0.877641	-0.798214	-0.671508	0.891348	0.000110509	4.82226e-05	0.641372	8.90043e-06	0.568729	0.00440395	0.0137846	0.00416977	0.000360958	0.00164257	0.999991	0.000343254	0.000179451	0.775554	3.18466e-05	0.999965	0.0982526	0.0700333	0.031049	0.01028	0.0120407	40	14	14	14	21	8	7	8	8	15	19	-1.27567	-0.386305
ETS2	ETS proto-oncogene 2, transcription factor	coding	blue	0.00113357	0.753062	0.805016	-0.345684	0.739324	0.447441	0.861779	0.968815	0.987091	0.798011	0.94379	0.994461	0.00187678	0.000513752	0.226047	0.000128454	0.266297	0.0126459	7.40593e-05	5.32651e-06	0.000363134	1.34784e-09	0.999991	0.00384873	0.00130293	0.404549	0.000317432	0.999965	0.0982526	0.00490513	0.00257874	0.0103187	7.747e-07	40	14	14	14	21	8	7	8	8	15	19	1.0501	1.0384
NOS3	nitric oxide synthase 3	coding	blue	0.0284727	0.815968	0.85482	-0.565622	0.76137	0.0129785	0.920002	0.905153	0.841573	0.797721	0.483441	0.861549	0.000372503	9.81374e-05	0.0350192	6.09891e-05	0.975668	0.00332876	0.00198425	0.0087972	0.000366259	0.0359962	0.999991	0.000960698	0.000324092	0.128019	0.000164577	0.999965	0.0982526	0.0240839	0.0463889	0.0103449	0.100324	40	14	14	14	21	8	7	8	8	15	19	2.63065	1.95249
VAMP1	vesicle associated membrane protein 1	coding	blue	-0.000873315	0.346632	0.114405	0.601582	0.224786	0.465293	0.89445	0.920498	0.83637	0.797585	0.553813	0.995733	0.224691	0.696954	0.022852	0.327265	0.245316	0.00656287	0.00118255	0.00965279	0.000367738	0.0138877	0.999991	0.276976	0.743586	0.101213	0.381372	0.999965	0.0982526	0.0185819	0.0490396	0.0103449	0.0519864	40	14	14	14	21	8	7	8	8	15	19	-0.319587	-0.359624
CD320	CD320 molecule	coding	pink	-0.0315084	-0.931812	-0.897057	-0.461648	-0.882093	0.0333901	0.889161	0.932785	0.867469	0.79755	0.801799	0.846955	1.25142e-06	1.37179e-05	0.0965716	1.24258e-07	0.93744	0.00739439	0.000721426	0.0052565	0.000368121	3.65776e-05	0.999991	9.46427e-06	6.54822e-05	0.238505	1.81109e-06	0.999965	0.0982526	0.0147126	0.0352617	0.0103449	0.000851794	40	14	14	14	21	8	7	8	8	15	19	0.342818	0.308568
IFT22	intraflagellar transport 22	coding	red	-0.0117198	-0.579334	-0.869367	0.527799	-0.695518	-0.0521079	0.922218	0.936591	0.835171	0.797539	0.670504	0.942781	0.0299206	5.38308e-05	0.0523996	0.000464288	0.902474	0.00310677	0.000607445	0.00985706	0.000368237	0.00167916	0.999991	0.0456995	0.000197016	0.163525	0.000998117	0.999965	0.0982526	0.0135571	0.0495203	0.0103449	0.0122522	40	14	14	14	21	8	7	8	8	15	19	-0.260836	-0.458505
ATXN7L3B	ataxin 7 like 3B	coding	grey60	0.0153854	0.631621	0.34855	0.484166	0.484184	-0.746912	-0.837693	-0.818188	-0.97073	-0.797441	-0.641803	0.92493	0.0153965	0.221963	0.0793729	0.0261382	0.0332246	0.0186403	0.0130506	6.13255e-05	0.000369301	0.00305362	0.999991	0.0251082	0.276797	0.210988	0.0386344	0.999965	0.102027	0.0677927	0.00526626	0.0103449	0.0185243	40	14	14	14	21	8	7	8	8	15	19	0.542566	0.728392
STRIP2	striatin interacting protein 2	coding	red	-0.043867	-0.954776	-0.960292	0.516882	-0.714409	0.069124	0.807744	0.85424	0.831307	0.797383	0.651011	0.788106	1.12005e-07	5.19441e-08	0.0584091	0.000274446	0.870805	0.027983	0.00692033	0.0105341	0.00036993	0.00253707	0.999991	1.58779e-06	9.16084e-07	0.174688	0.000624279	0.999965	0.121097	0.0468327	0.0519516	0.0103449	0.0163611	40	14	14	14	21	8	7	8	8	15	19	-1.61158	-1.50446
TPM1	tropomyosin 1	coding	tan	0.000578068	0.652418	0.817782	-0.0968538	0.716773	-0.110297	-0.7663	-0.839744	-0.820173	-0.797322	-0.606857	0.997175	0.0114401	0.000352478	0.741867	0.000256233	0.794864	0.0445088	0.00909223	0.0126478	0.000370603	0.00586703	0.999991	0.0192291	0.000944098	0.843683	0.000586862	0.999965	0.161543	0.0550365	0.0579158	0.0103449	0.0288335	40	14	14	14	21	8	7	8	8	15	19	1.71607	1.41428
TMEM106A	transmembrane protein 106A	coding	brown	-0.0089749	-0.457548	0.043496	-0.790536	-0.208432	-0.501086	-0.911182	-0.826433	-0.860339	-0.797279	-0.509991	0.956168	0.0999597	0.882625	0.000763476	0.364575	0.205887	0.0043025	0.0114293	0.00611686	0.000371074	0.0256969	0.999991	0.134926	0.904221	0.018766	0.419744	0.999965	0.0982526	0.0631384	0.0381587	0.0103449	0.0794273	40	14	14	14	21	8	7	8	8	15	19	-0.12888	-0.252008
TGFBR3	transforming growth factor beta receptor 3	coding	blue	0.0413108	0.970585	0.95706	0.197206	0.795966	0.124446	0.829353	0.921948	0.870474	0.797247	0.616308	0.800194	8.77688e-09	8.24876e-08	0.499188	1.59469e-05	0.769061	0.021028	0.00112027	0.00491852	0.000371419	0.00495361	0.999991	2.70071e-07	1.27982e-06	0.663677	5.19713e-05	0.999965	0.105962	0.0181148	0.0340506	0.0103449	0.0255563	40	14	14	14	21	8	7	8	8	15	19	1.01067	1.35879
CLK1	CDC like kinase 1	coding	blue	0.0345261	0.681592	0.56087	0.191608	0.592525	0.902754	0.892941	0.860186	0.969522	0.797121	0.561954	0.832496	0.0072632	0.0369281	0.511688	0.00464915	0.0021347	0.00679426	0.00613627	6.91676e-05	0.000372804	0.0122766	0.999991	0.0127702	0.0560571	0.673638	0.00803891	0.434403	0.0982526	0.0436653	0.00543245	0.0103607	0.0477067	40	14	14	14	21	8	7	8	8	15	19	1.1334	1.35633
ACTG1	actin gamma 1	coding	yellow	-0.0305741	-0.800534	-0.711023	-0.58757	-0.755365	-0.0094803	-0.853875	-0.904099	-0.980497	-0.796987	-0.894396	0.851441	0.000582717	0.00435941	0.0271371	7.52742e-05	0.982226	0.0144675	0.00204946	1.82763e-05	0.000374281	2.41564e-07	0.999991	0.00140325	0.00827698	0.111303	0.000197519	0.999965	0.0982526	0.0243668	0.00357067	0.0103789	2.65616e-05	40	14	14	14	21	8	7	8	8	15	19	3.16129	2.85671
SMOC1	SPARC related modular calcium binding 1	coding	tan	0.000292341	0.923242	0.954618	-0.807908	0.863186	0.0887143	-0.826803	-0.852139	-0.848528	-0.796862	-0.644459	0.998572	2.49861e-06	1.14334e-07	0.000472859	4.72693e-07	0.834531	0.0217908	0.00721198	0.00773122	0.000375658	0.00289645	0.999991	1.63535e-05	1.64853e-06	0.0169642	3.85792e-06	0.999965	0.107629	0.0481497	0.0430856	0.0103943	0.0178923	40	14	14	14	21	8	7	8	8	15	19	0.5966	0.129399
SLC48A1	solute carrier family 48 member 1	coding	blue	0.0107479	0.211208	-0.198137	0.435294	-0.00164595	-0.208175	0.816647	0.898615	0.8231	0.796623	0.788567	0.94752	0.468557	0.497125	0.119793	0.99435	0.620802	0.0249818	0.00241123	0.0120685	0.000378302	6.03568e-05	0.999991	0.529104	0.557975	0.272198	0.99509	0.999965	0.114821	0.0260821	0.0561318	0.0104446	0.0012112	40	14	14	14	21	8	7	8	8	15	19	0.37351	0.135306
PIGW	phosphatidylinositol glycan anchor biosynthesis class W	coding	brown	0.000961851	-0.885006	-0.797809	-0.490014	-0.788021	0.0445351	-0.858843	-0.962178	-0.860352	-0.79643	-0.788648	0.9953	2.5944e-05	0.000628157	0.075286	2.21694e-05	0.916607	0.0133061	0.000131451	0.0061152	0.000380449	6.01796e-05	0.999991	0.000103164	0.00154353	0.204071	6.85407e-05	0.999965	0.0982526	0.0065441	0.0381587	0.010481	0.00120981	40	14	14	14	21	8	7	8	8	15	19	-0.806853	-1.05421
CHRNA1	cholinergic receptor nicotinic alpha 1 subunit	coding	yellow	-0.00235723	-0.775584	-0.945927	0.536323	-0.825508	-0.0424709	-0.818621	-0.876829	-0.869128	-0.796338	-0.725459	0.988482	0.00111499	3.20993e-07	0.0480295	4.08251e-06	0.920463	0.0243424	0.00425069	0.00506814	0.000381477	0.000439366	0.999991	0.00245286	3.56675e-06	0.155607	1.71963e-05	0.999965	0.113225	0.0350848	0.0345969	0.0104865	0.00468447	40	14	14	14	21	8	7	8	8	15	19	-2.66991	-3.18406
PUF60	poly(U) binding splicing factor 60	coding	brown	-0.0388355	-0.849689	-0.808223	-0.291509	-0.826625	-0.368257	-0.899269	-0.935599	-0.910537	-0.795896	-0.707879	0.811944	0.000119475	0.000468572	0.311911	3.85866e-06	0.369404	0.00585485	0.000635928	0.00167212	0.000386447	0.000696617	0.999991	0.000366602	0.00120625	0.493817	1.64785e-05	0.999965	0.0982526	0.0138405	0.0203503	0.010595	0.00655005	40	14	14	14	21	8	7	8	8	15	19	0.945797	0.839776
SNX13	sorting nexin 13	coding	blue	0.0208853	0.782114	0.673998	0.184341	0.690748	0.248978	0.847602	0.828583	0.844641	0.795838	0.630397	0.898216	0.000948365	0.00821259	0.528121	0.000526983	0.5521	0.0160137	0.0110288	0.00831609	0.000387101	0.003811	0.999991	0.00213079	0.014567	0.6874	0.00111845	0.999965	0.0984975	0.0619422	0.0450904	0.010595	0.0214178	40	14	14	14	21	8	7	8	8	15	19	0.487304	0.746209
GBA2	glucosylceramidase beta 2	coding	yellow	-0.00402561	-0.838076	-0.908135	0.525479	-0.82092	0.399118	-0.861705	-0.944822	-0.891168	-0.795561	-0.546086	0.980332	0.000181842	7.101e-06	0.0536377	5.12529e-06	0.327328	0.0126622	0.000402807	0.00296533	0.000390258	0.0155693	0.999991	0.000523065	3.88207e-05	0.165709	2.03739e-05	0.999965	0.0982526	0.0110728	0.0262271	0.0106544	0.0564916	40	14	14	14	21	8	7	8	8	15	19	1.06971	0.96114
OMD	osteomodulin	coding	blue	0.0734533	0.948327	0.968457	-0.53958	0.842767	0.175607	0.924908	0.725896	0.420759	0.795493	0.544925	0.652395	2.45747e-07	1.32852e-08	0.0464321	1.62999e-06	0.677444	0.00284928	0.0414815	0.299245	0.000391031	0.0158354	0.999991	2.83903e-06	3.59334e-07	0.152542	8.65572e-06	0.999965	0.0982526	0.138642	0.49251	0.0106544	0.0571457	40	14	14	14	21	8	7	8	8	15	19	1.34299	2.07695
ASS1	argininosuccinate synthase 1	coding	blue	0.00743956	0.952076	0.991669	-0.746421	0.919228	-0.2055	0.71688	0.859827	0.886027	0.795409	0.751363	0.963661	1.57675e-07	4.74124e-12	0.00216633	3.96634e-09	0.625397	0.0698423	0.00618186	0.00339204	0.000391988	0.000208559	0.999991	2.03448e-06	2.72514e-09	0.0280021	1.19401e-06	0.999965	0.215822	0.0438662	0.0278395	0.0106544	0.00275573	40	14	14	14	21	8	7	8	8	15	19	1.78616	1.74793
NUDT16	nudix hydrolase 16	coding	grey60	0.00211022	0.105188	0.338489	-0.262429	0.212377	-0.0751565	-0.918313	-0.818312	-0.921875	-0.795331	-0.605951	0.989689	0.720434	0.2365	0.364722	0.35536	0.859611	0.00350402	0.0130251	0.00112332	0.000392881	0.0059614	0.999991	0.764958	0.292359	0.543793	0.41048	0.999965	0.0982526	0.0677927	0.0164907	0.0106544	0.0291613	40	14	14	14	21	8	7	8	8	15	19	0.769945	0.563743
ALAD	aminolevulinate dehydratase	coding	yellow	0.0166492	-0.285665	-0.128072	-0.274737	-0.185351	-0.310309	-0.874131	-0.883489	-0.735216	-0.795258	-0.598099	0.918783	0.322154	0.662599	0.341809	0.421176	0.454443	0.0100766	0.00361654	0.0376818	0.000393716	0.00683205	0.999991	0.379791	0.713069	0.523265	0.476707	0.999965	0.0982526	0.0322077	0.120575	0.0106544	0.0322115	40	14	14	14	21	8	7	8	8	15	19	0.186476	0.135306
ZNF337	zinc finger protein 337	coding	lightcyan	0.0274403	-0.124855	-0.638624	0.758125	-0.360213	0.812772	0.892728	0.957135	0.883169	0.795204	0.672603	0.866524	0.670632	0.0139632	0.00167739	0.108712	0.0141901	0.00682719	0.00019063	0.00364556	0.000394336	0.00160335	0.999991	0.720059	0.0233923	0.0251609	0.141223	0.88942	0.0982526	0.0078775	0.0288987	0.0106544	0.0118564	40	14	14	14	21	8	7	8	8	15	19	-0.781558	-1.50446
C19orf12	chromosome 19 open reading frame 12	coding	brown	-0.0154264	-0.71535	-0.457111	-0.550955	-0.570306	-0.0995509	-0.846642	-0.933099	-0.818974	-0.795132	-0.453098	0.924731	0.00402379	0.100326	0.0411558	0.00694483	0.814572	0.0162582	0.00071153	0.01289	0.00039517	0.0513927	0.999991	0.00752787	0.136808	0.141909	0.0116038	0.999965	0.0987916	0.0146286	0.0586142	0.0106544	0.128915	40	14	14	14	21	8	7	8	8	15	19	-0.426094	-0.169875
AC125807.2			darkgreen	-0.032247	-0.483523	-0.0883495	-0.406815	-0.280307	0.124895	0.861487	0.872149	0.92789	0.794961	0.581607	0.843411	0.0798315	0.763918	0.148859	0.218424	0.768245	0.0127108	0.00473644	0.000887422	0.00039714	0.00899956	0.999991	0.110349	0.802437	0.312798	0.265268	0.999965	0.0982526	0.0374437	0.0147994	0.0106848	0.0387997	40	14	14	14	21	8	7	8	8	15	19	-0.217344	-0.698605
AKAP12	A-kinase anchoring protein 12	coding	yellow	-0.0422896	-0.657613	-0.707881	-0.172706	-0.640739	-0.242634	-0.806299	-0.88437	-0.817733	-0.794804	-0.476329	0.79556	0.0105868	0.00461643	0.554907	0.0017513	0.562601	0.0284881	0.00353756	0.013144	0.000398955	0.0392344	0.999991	0.0179403	0.00870991	0.709751	0.00331714	0.999965	0.122467	0.0320034	0.0594443	0.0107063	0.106395	40	14	14	14	21	8	7	8	8	15	19	1.44541	2.13899
NACC1	nucleus accumbens associated 1	coding	yellow	-0.140245	-0.962966	-0.957328	-0.488369	-0.845548	-0.525333	-0.894932	-0.937182	-0.956336	-0.794746	-0.833613	0.38806	3.43849e-08	7.94856e-08	0.0764204	1.39163e-06	0.18122	0.00648995	0.000590887	0.000201367	0.000399635	9.27767e-06	0.999991	6.91541e-07	1.24239e-06	0.205847	7.7282e-06	0.999965	0.0982526	0.0133903	0.00776234	0.0107063	0.000337563	40	14	14	14	21	8	7	8	8	15	19	0.472731	0.207377
ULK2	unc-51 like autophagy activating kinase 2	coding	grey60	0.00582633	0.824079	0.119974	0.746293	0.454562	0.467624	-0.913235	-0.900361	-0.944772	-0.79451	-0.805251	0.971537	0.000289591	0.682884	0.00217224	0.0384316	0.24264	0.00406275	0.00229187	0.00040389	0.000402379	3.19018e-05	0.999991	0.000775493	0.731104	0.0280021	0.0549675	0.999965	0.0982526	0.025624	0.0104871	0.010757	0.000768378	40	14	14	14	21	8	7	8	8	15	19	0.0614418	0.111333
NAT6			red	-0.0126032	-0.30659	-0.293604	-0.00681982	-0.287762	-0.0639366	0.888301	0.862089	0.871695	0.794187	0.706097	0.938476	0.286356	0.308287	0.98154	0.205905	0.880445	0.00753496	0.00589795	0.00478536	0.000406172	0.000728609	0.999991	0.343114	0.368179	0.988812	0.251587	0.999965	0.0982526	0.0426007	0.0334789	0.0108159	0.00675955	40	14	14	14	21	8	7	8	8	15	19	-0.307409	-0.346702
PDE6D	phosphodiesterase 6D	coding	blue	-0.00161531	0.258423	0.232458	-0.048245	0.214972	0.284548	0.811324	0.872463	0.898245	0.794159	0.6707	0.992107	0.372356	0.423865	0.869904	0.349372	0.494571	0.0267533	0.00470276	0.002437	0.000406499	0.00167199	0.999991	0.432721	0.485486	0.922891	0.40408	0.999965	0.118368	0.0373533	0.0236137	0.0108159	0.012221	40	14	14	14	21	8	7	8	8	15	19	-0.0347799	-0.0640479
PHACTR4	phosphatase and actin regulator 4	coding	steelblue	-0.0162534	-0.283145	0.171656	-0.527553	-0.0652456	-0.0220049	0.8747	0.981256	0.82323	0.794058	0.48994	0.920707	0.326628	0.557353	0.0525301	0.778723	0.958754	0.00996644	1.62331e-05	0.0120431	0.000407698	0.033222	0.999991	0.384635	0.614824	0.163687	0.813529	0.999965	0.0982526	0.00357007	0.0560821	0.0108159	0.0950436	40	14	14	14	21	8	7	8	8	15	19	0.823931	0.839776
APPL1	adaptor protein, phosphotyrosine interacting with PH domain and leucine zipper 1	coding	blue	-0.00539763	0.47334	0.818801	-0.436219	0.59342	0.268535	0.566474	0.964016	0.863223	0.79403	0.474336	0.97363	0.0873474	0.000341619	0.118919	0.00457193	0.520179	0.18488	0.000113361	0.00575873	0.000408025	0.0401808	0.999991	0.119574	0.000919491	0.270961	0.00791837	0.999965	0.404188	0.00599772	0.0370581	0.0108159	0.108057	40	14	14	14	21	8	7	8	8	15	19	0.774617	0.834086
WFS1	wolframin ER transmembrane glycoprotein	coding	yellow	-0.00334662	-0.86038	-0.935191	0.571317	-0.872098	-0.293015	-0.836474	-0.830359	-0.891817	-0.79396	-0.76573	0.983649	7.86259e-05	9.2942e-07	0.0328292	2.58479e-07	0.481233	0.0189791	0.0107048	0.00291404	0.000408856	0.000132662	0.999991	0.00025925	7.92358e-06	0.124363	2.67946e-06	0.999965	0.102473	0.0608095	0.0260226	0.0108159	0.00205516	40	14	14	14	21	8	7	8	8	15	19	-0.0112926	-0.506239
COL23A1	collagen type XXIII alpha 1 chain	coding	blue	0.00656904	0.935042	0.98619	-0.816391	0.893359	-0.14477	0.912659	0.856533	0.881641	0.793816	0.595584	0.96791	9.42018e-07	9.72239e-11	0.000367748	5.00879e-08	0.732325	0.0041292	0.00661083	0.00378594	0.000410557	0.00713193	0.999991	7.49171e-06	1.4131e-08	0.0151544	1.40124e-06	0.999965	0.0982526	0.0457047	0.0295543	0.0108229	0.0331485	40	14	14	14	21	8	7	8	8	15	19	1.62304	1.3789
PPP2R3A	protein phosphatase 2 regulatory subunit B''alpha	coding	salmon	0.000317155	-0.00110634	-0.621175	0.526814	-0.278885	0.0301951	-0.825846	-0.858847	-0.981339	-0.793674	-0.707614	0.99845	0.997005	0.0177394	0.0529226	0.220867	0.943419	0.0220809	0.00630762	1.60187e-05	0.000412253	0.000701287	0.999991	0.997321	0.0289439	0.164465	0.268003	0.999965	0.107871	0.044484	0.00344828	0.0108229	0.00658335	40	14	14	14	21	8	7	8	8	15	19	-0.0844319	0.0263265
LYPLA2	lysophospholipase 2	coding	yellow	-0.0415067	-0.889216	-0.918561	0.345674	-0.88015	0.0703932	-0.823964	-0.918028	-0.889411	-0.79364	-0.81257	0.799266	2.09393e-05	3.52737e-06	0.226061	1.43992e-07	0.868448	0.0226581	0.00129375	0.00310699	0.000412652	2.36585e-05	0.999991	8.73277e-05	2.25157e-05	0.404549	1.96205e-06	0.999965	0.109728	0.0193374	0.0268748	0.0108229	0.000639233	40	14	14	14	21	8	7	8	8	15	19	0.37351	0.212589
NAA50	N-alpha-acetyltransferase 50, NatE catalytic subunit	coding	brown	-0.00671822	-0.936744	-0.891406	-0.419077	-0.873924	-0.286776	-0.869852	-0.955578	-0.903794	-0.793619	-0.721321	0.967182	8.06282e-07	1.86667e-05	0.135824	2.27163e-07	0.491048	0.010929	0.000211905	0.00206856	0.0004129	0.000491191	0.999991	6.68732e-06	8.37914e-05	0.295255	2.49998e-06	0.999965	0.0982526	0.00831123	0.0221294	0.0108229	0.00511685	40	14	14	14	21	8	7	8	8	15	19	0.37778	0.651515
ADAM19	ADAM metallopeptidase domain 19	coding	paleturquoise	0.00414444	0.223927	-0.419042	0.513625	-0.0573299	0.236697	0.847026	0.92931	0.818512	0.793428	0.543629	0.979751	0.441541	0.135861	0.0602939	0.805037	0.572491	0.0161601	0.000836938	0.0129842	0.000415183	0.0161369	0.999991	0.502862	0.17916	0.178176	0.836664	0.999965	0.0986598	0.0158263	0.0588899	0.0108229	0.0578375	40	14	14	14	21	8	7	8	8	15	19	0.929448	-0.0722089
CTHRC1	collagen triple helix repeat containing 1	coding	yellow	-0.0500165	-0.585095	-0.686325	0.333192	-0.575026	-0.0124339	-0.815951	-0.884867	-0.921835	-0.793405	-0.755875	0.759229	0.0279523	0.00671618	0.244383	0.00639208	0.976689	0.0252095	0.00349349	0.00112503	0.000415458	0.000181523	0.999991	0.0430048	0.0121531	0.424714	0.0107613	0.999965	0.115331	0.0318532	0.0164907	0.0108229	0.00251132	40	14	14	14	21	8	7	8	8	15	19	-0.950371	-2.50267
CGNL1	cingulin like 1	coding	blue	0.0247463	0.610584	0.575942	0.18565	0.602399	-0.470027	0.916997	0.909136	0.839552	0.793397	0.451481	0.879527	0.0203814	0.031127	0.525144	0.003854	0.239898	0.0036442	0.00175003	0.00912346	0.000415564	0.0523345	0.999991	0.0322961	0.0480763	0.685032	0.00679786	0.999965	0.0982526	0.0224433	0.0473744	0.0108229	0.130617	40	14	14	14	21	8	7	8	8	15	19	1.52514	1.74179
NKIRAS2	NFKB inhibitor interacting Ras like 2	coding	yellow	-0.00887539	-0.585488	-0.777421	0.420881	-0.653277	0.0529852	-0.800461	-0.890121	-0.871292	-0.793363	-0.633307	0.956653	0.0278216	0.00106594	0.133973	0.00132219	0.900839	0.0305808	0.00304922	0.00482904	0.000415968	0.00360445	0.999991	0.0428455	0.00242642	0.293096	0.00257376	0.999965	0.127619	0.0296273	0.0336251	0.0108229	0.0206986	40	14	14	14	21	8	7	8	8	15	19	0.723823	0.560789
GCKR	glucokinase regulator	coding	red	-0.0244441	-0.914254	-0.928104	0.0638783	-0.892769	0.250744	0.877614	0.897442	0.867758	0.793139	0.630728	0.880987	4.75991e-06	1.70551e-06	0.82825	5.26557e-08	0.54919	0.00941238	0.00249364	0.00522333	0.000418663	0.00378704	0.999991	2.71122e-05	1.26603e-05	0.900225	1.40604e-06	0.999965	0.0982526	0.0265645	0.0351403	0.0108706	0.0213401	40	14	14	14	21	8	7	8	8	15	19	-2.66991	-3.18406
RBBP8	RB binding protein 8, endonuclease	coding	darkgreen	0.0270467	-0.689138	0.0798932	-0.545021	-0.317912	0.559631	0.820037	0.908447	0.946401	0.792623	0.557682	0.868421	0.00640655	0.78601	0.0438499	0.160201	0.149194	0.0238894	0.00178914	0.000369638	0.00042493	0.0131021	0.999991	0.0113975	0.822296	0.147273	0.200291	0.999965	0.112248	0.0227036	0.0100966	0.0109689	0.0499408	40	14	14	14	21	8	7	8	8	15	19	-0.157066	-0.00974339
DACT3	dishevelled binding antagonist of beta catenin 3	coding	tan	0.00822141	0.954994	0.93663	0.582146	0.867435	-0.216794	-0.823649	-0.793595	-0.88712	-0.79258	-0.705241	0.959844	1.08863e-07	8.14834e-07	0.0289473	3.56403e-07	0.606067	0.0227554	0.0187209	0.00329819	0.00042545	0.000744406	0.999991	1.55655e-06	7.19523e-06	0.115591	3.24871e-06	0.999965	0.109951	0.084023	0.0274935	0.0109689	0.00683588	40	14	14	14	21	8	7	8	8	15	19	-0.344641	-0.576198
CUL5	cullin 5	coding	red	-0.0460407	-0.409145	-0.376496	-0.057831	-0.352108	0.431581	0.870481	0.865242	0.946677	0.792523	0.360026	0.777864	0.146321	0.184562	0.844319	0.117495	0.285655	0.0108012	0.00551628	0.000364042	0.000426153	0.130005	0.999991	0.189456	0.235451	0.908453	0.151373	0.999965	0.0982526	0.0411516	0.0100509	0.0109689	0.253533	40	14	14	14	21	8	7	8	8	15	19	0.139276	0.478604
RAB11FIP5	RAB11 family interacting protein 5	coding	red	-0.00430622	-0.804601	-0.689793	-0.404437	-0.717157	-0.18194	0.855108	0.886131	0.792615	0.792502	0.648807	0.978961	0.000519856	0.00633599	0.151479	0.00025337	0.666316	0.0141742	0.00338305	0.0189739	0.000426411	0.00265357	0.999991	0.00127416	0.0115378	0.316447	0.000581524	0.999965	0.0982526	0.0313413	0.0756383	0.0109689	0.0169232	40	14	14	14	21	8	7	8	8	15	19	0.879796	0.714685
CALCOCO2	calcium binding and coiled-coil domain 2	coding	blue	0.0122958	0.908893	0.969031	-0.560688	0.819696	0.148982	0.847307	0.878801	0.820833	0.792471	0.693482	0.939974	6.76805e-06	1.19148e-08	0.0370023	5.44025e-06	0.724765	0.0160887	0.00405606	0.0125156	0.000426787	0.00099243	0.999991	3.53353e-05	3.32771e-07	0.132176	2.13972e-05	0.999965	0.0985974	0.0341308	0.0575909	0.0109689	0.00838855	40	14	14	14	21	8	7	8	8	15	19	0.951158	1.13704
PHF20	PHD finger protein 20	coding	blue	0.00765847	0.811871	0.406833	0.504272	0.569143	-0.493953	0.755481	0.938445	0.888668	0.792024	0.829262	0.962592	0.000421105	0.148839	0.0659495	0.00708688	0.213461	0.0495266	0.000556494	0.0031682	0.000432298	1.13741e-05	0.999991	0.00106519	0.194048	0.188544	0.0118208	0.999965	0.173049	0.0129444	0.0271272	0.0110881	0.000383926	40	14	14	14	21	8	7	8	8	15	19	0.605691	0.651515
MARK4	microtubule affinity regulating kinase 4	coding	blue	0.0131643	0.389142	-0.0614069	0.330822	0.155349	-0.738911	0.730563	0.915049	0.93987	0.791855	0.710305	0.935743	0.169062	0.83481	0.247961	0.501326	0.0362365	0.0622083	0.00143668	0.000519293	0.000434392	0.000654968	0.999991	0.215459	0.863208	0.428576	0.555978	0.999965	0.200052	0.0203208	0.0118315	0.0111165	0.00626955	40	14	14	14	21	8	7	8	8	15	19	0.382023	0.440263
CTSS	cathepsin S	coding	tan	0.0302143	0.700631	0.828218	-0.444775	0.75383	-0.32579	-0.907994	-0.898344	-0.890465	-0.791753	-0.718183	0.853171	0.00525502	0.000253443	0.111042	7.93581e-05	0.430991	0.00469075	0.00243009	0.00302148	0.000435671	0.000533861	0.999991	0.00955149	0.000712016	0.260603	0.000206691	0.999965	0.0982526	0.0262157	0.026514	0.0111165	0.00543385	40	14	14	14	21	8	7	8	8	15	19	0.251475	-0.150935
NCOA3	nuclear receptor coactivator 3	coding	blue	0.0341249	0.952758	0.957989	0.0436825	0.846396	0.220001	0.897133	0.841177	0.955562	0.791723	0.797162	0.834416	1.44897e-07	7.24884e-08	0.882125	1.3253e-06	0.600615	0.00616281	0.00886048	0.000212138	0.000436045	4.37738e-05	0.999991	1.91685e-06	1.16056e-06	0.92865	7.45987e-06	0.999965	0.0982526	0.0542045	0.00795806	0.0111165	0.000972795	40	14	14	14	21	8	7	8	8	15	19	1.28027	1.48421
AKT1	AKT serine/threonine kinase 1	coding	yellow	-0.0356385	-0.864857	-0.753912	-0.638613	-0.794861	-0.153914	-0.849031	-0.992834	-0.960776	-0.79146	-0.730632	0.82718	6.53187e-05	0.00184204	0.0139654	1.67082e-05	0.715936	0.0156537	9.15105e-07	0.00014646	0.000439335	0.000381138	0.999991	0.000220902	0.00387758	0.0767458	5.40287e-05	0.999965	0.0984578	0.00192858	0.00711689	0.0111698	0.00422022	40	14	14	14	21	8	7	8	8	15	19	1.3912	1.2402
RNF125	ring finger protein 125	coding	blue	0.00656922	0.833391	0.918256	-0.467981	0.809252	0.423318	0.904342	0.967113	0.849778	0.791415	0.589154	0.96791	0.000213482	3.60505e-06	0.0914947	8.89259e-06	0.296003	0.00515978	8.67418e-05	0.00754881	0.0004399	0.00794741	0.999991	0.000598023	2.28553e-05	0.23102	3.18366e-05	0.999965	0.0982526	0.00511232	0.0426771	0.0111698	0.0357761	40	14	14	14	21	8	7	8	8	15	19	-0.23873	0.169613
UGP2	UDP-glucose pyrophosphorylase 2	coding	blue	-0.00121609	0.640194	0.801041	-0.43536	0.680173	0.561678	0.836385	0.942923	0.943175	0.791268	0.546424	0.994058	0.0136565	0.000574565	0.11973	0.00069218	0.14739	0.019004	0.000445196	0.000439406	0.000441751	0.0154925	0.999991	0.0225498	0.00142879	0.272104	0.00143017	0.999965	0.102519	0.0118019	0.0109049	0.0111943	0.0563101	40	14	14	14	21	8	7	8	8	15	19	1.04704	0.995858
PLEKHM2	pleckstrin homology and RUN domain containing M2	coding	steelblue	-0.00131322	-0.0404192	0.269619	-0.335656	0.108809	-0.754338	0.816793	0.886574	0.892555	0.790968	0.70025	0.993583	0.890881	0.351237	0.240696	0.638719	0.0305707	0.0249344	0.00334484	0.00285644	0.00044555	0.000842397	0.999991	0.910172	0.412692	0.421191	0.686903	0.999965	0.114736	0.0311684	0.0256532	0.011268	0.00746249	40	14	14	14	21	8	7	8	8	15	19	0.982436	0.810788
SFXN1	sideroflexin 1	coding	brown	-0.0478533	-0.970284	-0.962841	-0.781835	-0.914421	-0.377063	-0.910683	-0.925606	-0.729151	-0.790816	-0.465019	0.769353	9.32456e-09	3.50806e-08	0.000955055	6.73861e-09	0.357161	0.00436201	0.000972741	0.0401294	0.000447477	0.0448405	0.999991	2.79405e-07	6.98574e-07	0.0201069	1.19401e-06	0.999965	0.0982526	0.0169534	0.125759	0.0112814	0.117078	40	14	14	14	21	8	7	8	8	15	19	0.0187733	0.262434
HIVEP1	HIVEP zinc finger 1	coding	tan	0.0459925	0.691915	0.712826	-0.0462916	0.619567	-0.615035	-0.847765	-0.956631	-0.917263	-0.790785	-0.516909	0.778091	0.00611189	0.00421698	0.875134	0.00274105	0.104619	0.0159724	0.00019735	0.00132953	0.000447867	0.0234372	0.999991	0.0109407	0.00803068	0.925228	0.00499	0.999965	0.0984895	0.00802408	0.0179422	0.0112814	0.0745449	40	14	14	14	21	8	7	8	8	15	19	0.975613	0.586878
CEP19	centrosomal protein 19	coding	blue	-0.0175569	0.373071	0.302466	-0.14047	0.452553	0.0311738	0.858575	0.929048	0.945298	0.790578	0.873845	0.914371	0.188912	0.293218	0.631955	0.0394052	0.941587	0.0133675	0.000846119	0.000392608	0.000450515	1.01856e-06	0.999991	0.23762	0.352581	0.767866	0.0562138	0.999965	0.0982526	0.0158741	0.0104246	0.0113256	7.23577e-05	40	14	14	14	21	8	7	8	8	15	19	-2.334	-1.42683
GPSM1	G protein signaling modulator 1	coding	yellow	-0.0185045	-0.807682	-0.908403	0.686668	-0.76168	0.428764	-0.914839	-0.908113	-0.874027	-0.790263	-0.541904	0.909768	0.00047596	6.9819e-06	0.00667778	6.03209e-05	0.289163	0.00388101	0.00180832	0.00453748	0.000454564	0.0165451	0.999991	0.00118056	3.83186e-05	0.0515106	0.000162982	0.999965	0.0982526	0.0228702	0.0324344	0.0113266	0.0586918	40	14	14	14	21	8	7	8	8	15	19	0.430906	0.227968
MBD2	methyl-CpG binding domain protein 2	coding	brown	0.00458156	-0.938064	-0.687012	-0.848516	-0.722718	-0.643768	-0.864439	-0.880835	-0.810701	-0.790249	-0.702123	0.977616	7.12528e-07	0.00663947	0.000124844	0.000214949	0.0849724	0.0120642	0.00386137	0.0146418	0.000454755	0.000804441	0.999991	6.06935e-06	0.0120298	0.0120767	0.000502222	0.999965	0.0982526	0.0333066	0.0636021	0.0113266	0.00722642	40	14	14	14	21	8	7	8	8	15	19	0.663284	0.664173
OGT	O-linked N-acetylglucosamine (GlcNAc) transferase	coding	darkorange	-0.00978184	0.501094	0.109117	0.537177	0.27334	-0.0608708	0.857422	0.979083	0.970127	0.790141	0.889548	0.952231	0.067955	0.710395	0.047607	0.230567	0.886149	0.0136327	2.2521e-05	6.51601e-05	0.000456146	3.47798e-07	0.999991	0.0956894	0.75506	0.155112	0.27857	0.999965	0.0982526	0.00364605	0.00537252	0.0113266	3.35718e-05	40	14	14	14	21	8	7	8	8	15	19	1.69803	1.68503
CDC14A	cell division cycle 14A	coding	yellow	-0.0227929	-0.627193	-0.771395	0.471353	-0.703469	0.484927	-0.736692	-0.822385	-0.889748	-0.789986	-0.629593	0.888975	0.016359	0.00123366	0.0888696	0.00037392	0.223247	0.0589434	0.0122083	0.00307947	0.000458157	0.00386977	0.999991	0.0264898	0.0027411	0.227022	0.000822442	0.999965	0.193695	0.0656234	0.0267628	0.0113266	0.0216327	40	14	14	14	21	8	7	8	8	15	19	-0.757201	-0.634387
GCN1	GCN1 activator of EIF2AK4	coding	brown	-0.0247324	-0.868897	-0.818704	-0.385734	-0.850094	-0.635776	-0.857979	-0.938694	-0.813694	-0.789964	-0.369359	0.879594	5.49432e-05	0.000342638	0.173153	1.06752e-06	0.0902008	0.0135041	0.000549867	0.0139919	0.000458439	0.119631	0.999991	0.000192081	0.000921843	0.344636	6.41812e-06	0.999965	0.0982526	0.0128999	0.0619495	0.0113266	0.238676	40	14	14	14	21	8	7	8	8	15	19	1.46362	1.0533
CNOT6L	CCR4-NOT transcription complex subunit 6 like	coding	darkgrey	0.00350297	0.682852	0.440789	0.435464	0.546502	-0.0755824	-0.801575	-0.815093	-0.835782	-0.789759	-0.535239	0.982885	0.00711432	0.114666	0.119632	0.0103663	0.858822	0.0301748	0.0136944	0.00975267	0.000461106	0.0182001	0.999991	0.0125346	0.153879	0.271932	0.0167027	0.999965	0.12647	0.0697883	0.0491913	0.0113266	0.0627597	40	14	14	14	21	8	7	8	8	15	19	0.390427	0.74401
DAAM1	dishevelled associated activator of morphogenesis 1	coding	grey	0.00664875	0.476552	0.124525	0.295017	0.285516	0.132454	-0.722167	-0.903996	-0.885485	-0.789749	-0.83884	0.967521	0.0849251	0.671459	0.305853	0.209625	0.754537	0.0668364	0.00205591	0.00343926	0.000461242	7.2074e-06	0.999991	0.116599	0.721377	0.488627	0.255539	0.999965	0.209833	0.0244076	0.0279855	0.0113266	0.0002875	40	14	14	14	21	8	7	8	8	15	19	0.31532	0.461469
PHLDB1	pleckstrin homology like domain family B member 1	coding	yellow	-0.0916851	-0.117472	-0.229891	0.16349	-0.13721	-0.0120749	-0.868225	-0.847562	-0.868185	-0.789748	-0.652932	0.573662	0.689193	0.429146	0.576524	0.553122	0.977362	0.0112634	0.00787408	0.00517466	0.000461262	0.00243906	0.999991	0.73686	0.490824	0.726761	0.605666	0.999965	0.0982526	0.0505311	0.0349165	0.0113266	0.0158815	40	14	14	14	21	8	7	8	8	15	19	1.62176	1.39221
HVCN1	hydrogen voltage gated channel 1	coding	blue	0.0177002	0.917076	0.926718	0.1869	0.858427	-0.0440248	0.858502	0.886159	0.94122	0.789744	0.607782	0.913675	3.9184e-06	1.90664e-06	0.522307	6.41521e-07	0.91756	0.0133842	0.00338061	0.000485617	0.000461313	0.00577198	0.999991	2.32511e-05	1.38243e-05	0.682785	4.66745e-06	0.999965	0.0982526	0.0313413	0.0114564	0.0113266	0.0285396	40	14	14	14	21	8	7	8	8	15	19	-0.950371	-1.18763
HIC2	HIC ZBTB transcriptional repressor 2	coding	yellow	-0.0512326	-0.685076	-0.717858	0.343047	-0.583832	0.413923	-0.816112	-0.902407	-0.849976	-0.789717	-0.682211	0.753555	0.00685724	0.00383884	0.229844	0.00545771	0.307986	0.0251569	0.00215704	0.00752026	0.00046166	0.00129178	0.999991	0.0121323	0.0073761	0.408429	0.00930843	0.999965	0.115257	0.0248867	0.0426047	0.0113266	0.0101709	40	14	14	14	21	8	7	8	8	15	19	-0.535945	-0.655063
BNIP3	BCL2 interacting protein 3	coding	yellow	-0.0503533	-0.846477	-0.853131	-0.00579004	-0.768085	-0.113308	-0.904647	-0.911519	-0.744126	-0.789711	-0.537135	0.757656	0.000134647	0.00010479	0.984327	4.7853e-05	0.78936	0.00511962	0.00161886	0.0342551	0.000461737	0.0177165	0.999991	0.000406644	0.000342306	0.990594	0.000133504	0.999965	0.0982526	0.0216619	0.113022	0.0113266	0.0616147	40	14	14	14	21	8	7	8	8	15	19	-0.0347799	0.447413
FOXJ2	forkhead box J2	coding	blue	0.0300683	0.831943	0.850236	-0.307798	0.797487	0.360115	0.881051	0.788774	0.887062	0.789628	0.587548	0.853872	0.000224116	0.000117035	0.284363	1.49479e-05	0.38089	0.00878223	0.0199856	0.00330316	0.00046282	0.00816252	0.999991	0.000621343	0.000375552	0.465774	4.92614e-05	0.999965	0.0982526	0.0870841	0.0274935	0.0113266	0.0364331	40	14	14	14	21	8	7	8	8	15	19	0.565355	0.782453
LXN	latexin	coding	yellow	-0.00515767	-0.464006	-0.742135	0.319273	-0.573574	0.184127	-0.838319	-0.904617	-0.970369	-0.789588	-0.843133	0.974802	0.0946592	0.0023712	0.265848	0.00655812	0.662485	0.0184674	0.00201722	6.36024e-05	0.000463353	5.81845e-06	0.999991	0.128568	0.00480973	0.446493	0.0110188	0.999965	0.102004	0.0241395	0.00537252	0.0113266	0.000252006	40	14	14	14	21	8	7	8	8	15	19	0.472731	0.0332954
NOX4	NADPH oxidase 4	coding	yellow	-0.00477239	-0.6144	-0.874064	0.747653	-0.697873	0.225818	-0.853249	-0.913576	-0.874189	-0.789495	-0.497201	0.976684	0.0193976	4.36716e-05	0.00211008	0.000435755	0.590765	0.0146177	0.00151099	0.00452049	0.000464567	0.0303218	0.999991	0.0308997	0.000165387	0.0277404	0.000942867	0.999965	0.0982526	0.0209731	0.0323495	0.0113266	0.0891002	40	14	14	14	21	8	7	8	8	15	19	-0.455653	-0.823067
MRPL16	mitochondrial ribosomal protein L16	coding	brown	-0.0372208	-0.850946	-0.80646	-0.654183	-0.807294	0.121602	-0.894116	-0.83887	-0.882388	-0.789483	-0.592459	0.819631	0.000113931	0.000492999	0.0111446	9.71911e-06	0.774233	0.00661367	0.00923532	0.0037169	0.000464724	0.00751926	0.999991	0.000352281	0.00125786	0.0675566	3.42049e-05	0.999965	0.0982526	0.0556209	0.0291926	0.0113266	0.0343837	40	14	14	14	21	8	7	8	8	15	19	-0.0758918	0.0263265
AMN1	antagonist of mitotic exit network 1 homolog	coding	orange	0.0136866	0.165088	-0.270335	0.418162	-0.0395026	-0.35468	-0.93171	-0.9514	-0.83187	-0.789471	-0.66781	0.933199	0.572751	0.34991	0.13677	0.865007	0.388643	0.00225566	0.000276616	0.0104337	0.000464888	0.00178081	0.999991	0.630166	0.411324	0.296853	0.886746	0.999965	0.0982526	0.00945309	0.0515739	0.0113266	0.0127741	40	14	14	14	21	8	7	8	8	15	19	-0.950371	-0.77025
HIC1	HIC ZBTB transcriptional repressor 1	coding	salmon	-0.00461642	-0.360664	-0.864052	0.530568	-0.558671	-0.188081	-0.921622	-0.884707	-0.835083	-0.789358	-0.478069	0.977446	0.205215	6.75667e-05	0.0509498	0.00847737	0.655576	0.00316558	0.00350764	0.00987208	0.000466371	0.038422	0.999991	0.255861	0.000238254	0.161245	0.013909	0.999965	0.0982526	0.0318532	0.0495367	0.0113409	0.104663	40	14	14	14	21	8	7	8	8	15	19	-0.0844319	0.0537443
MAN2A1	mannosidase alpha class 2A member 1	coding	salmon	-0.010074	-0.836245	-0.905874	0.331388	-0.845103	0.34011	-0.888305	-0.844321	-0.926061	-0.789086	-0.707194	0.950806	0.000193719	8.17513e-06	0.247102	1.42756e-06	0.409766	0.00753438	0.00836552	0.000955339	0.000469972	0.000708759	0.999991	0.000550663	4.35444e-05	0.428029	7.84758e-06	0.999965	0.0982526	0.052469	0.0151088	0.0114065	0.00663379	40	14	14	14	21	8	7	8	8	15	19	0.324614	0.800816
RNF11	ring finger protein 11	coding	blue	0.116155	0.857999	0.85827	-0.230466	0.818908	0.270432	0.840442	0.896624	0.862689	0.789017	0.562773	0.47538	8.65535e-05	8.56193e-05	0.427961	5.65174e-06	0.51712	0.0178887	0.00255216	0.00582401	0.000470883	0.0121231	0.999991	0.00028121	0.000289326	0.603162	2.20779e-05	0.999965	0.101386	0.0269202	0.0373452	0.0114067	0.047322	40	14	14	14	21	8	7	8	8	15	19	1.03304	1.23523
P2RX4	purinergic receptor P2X 4	coding	yellow	0.0325757	-0.462761	-0.168629	-0.162693	-0.292706	-0.118014	-0.839249	-0.867366	-0.879999	-0.788765	-0.637083	0.841835	0.0956649	0.564427	0.578408	0.197874	0.78077	0.0182128	0.00526831	0.00394067	0.000474241	0.00335029	0.999991	0.12978	0.621489	0.728339	0.242711	0.999965	0.101711	0.0399627	0.0301621	0.0114661	0.0197872	40	14	14	14	21	8	7	8	8	15	19	0.0545199	-0.0973567
CD58	CD58 molecule	coding	blue	0.0109717	0.889548	0.888948	-0.250839	0.840506	0.128065	0.861996	0.835291	0.878373	0.788358	0.514396	0.946428	2.058e-05	2.12314e-05	0.387038	1.84949e-06	0.762491	0.0125979	0.00983641	0.00409779	0.000479704	0.024239	0.999991	8.60563e-05	9.3328e-05	0.565443	9.48369e-06	0.999965	0.0982526	0.0579867	0.0307699	0.0115761	0.076093	40	14	14	14	21	8	7	8	8	15	19	0.0260797	0.281301
TNS2	tensin 2	coding	blue	0.0187715	0.918586	0.902672	0.209067	0.888072	-0.0172344	0.90143	0.943489	0.846101	0.788179	0.550943	0.908472	3.52106e-06	9.92165e-06	0.473182	7.76419e-08	0.967692	0.00555251	0.000432274	0.00809325	0.000482128	0.0144943	0.999991	2.14573e-05	5.07111e-05	0.642019	1.57589e-06	0.999965	0.0982526	0.0116053	0.044322	0.0115874	0.0535596	40	14	14	14	21	8	7	8	8	15	19	2.10042	1.9861
AGPAT4	1-acylglycerol-3-phosphate O-acyltransferase 4	coding	blue	-0.009995	0.842853	0.768204	0.458033	0.761931	-0.539557	0.861714	0.951159	0.853269	0.788102	0.657743	0.951191	0.000153602	0.0013306	0.099555	5.97843e-05	0.167528	0.0126603	0.000280703	0.00705417	0.000483166	0.00220716	0.999991	0.000454233	0.00292923	0.242745	0.000161775	0.999965	0.0982526	0.0094653	0.041285	0.0115874	0.0147748	40	14	14	14	21	8	7	8	8	15	19	0.515515	0.42202
SLC25A10	solute carrier family 25 member 10	coding	brown	-0.0794015	-0.889909	-0.895679	0.0757446	-0.666818	-0.0430424	-0.809419	-0.871126	-0.903253	-0.788097	-0.747199	0.62624	2.01969e-05	1.48115e-05	0.796904	0.000962134	0.919395	0.0274036	0.00484717	0.00210281	0.000483232	0.000236473	0.999991	8.48027e-05	6.95994e-05	0.878911	0.001929	0.999965	0.119988	0.0379757	0.0223715	0.0115874	0.00302346	40	14	14	14	21	8	7	8	8	15	19	-1.61158	-2.50267
SIK3	SIK family kinase 3	coding	blue	0.0321722	0.771268	0.670232	0.281143	0.708878	-0.302064	0.911357	0.879466	0.931377	0.787987	0.611809	0.84377	0.00123739	0.00871763	0.330207	0.000321438	0.467139	0.00428176	0.00399173	0.000766862	0.000484726	0.00537271	0.999991	0.00267603	0.0153698	0.511951	0.000719141	0.999965	0.0982526	0.0338677	0.0139927	0.0115874	0.0271534	40	14	14	14	21	8	7	8	8	15	19	0.593541	0.491978
PC	pyruvate carboxylase	coding	lightcyan	0.0264692	-0.261082	-0.668095	0.717769	-0.434715	-0.462335	0.893701	0.931019	0.881334	0.787907	0.774209	0.871207	0.367279	0.00901473	0.00384525	0.0489163	0.248733	0.00667714	0.000778716	0.00381453	0.000485821	0.000100067	0.999991	0.427647	0.0158277	0.037898	0.0684384	0.999965	0.0982526	0.0153617	0.0296481	0.0115874	0.00168533	40	14	14	14	21	8	7	8	8	15	19	-0.553251	-0.458505
DDX27	DEAD-box helicase 27	coding	blue	0.0275282	-0.443603	0.391048	-0.733391	-0.0329351	0.0663317	0.696789	0.80088	0.904968	0.787878	0.740543	0.8661	0.112099	0.166801	0.00283665	0.887298	0.875992	0.0819154	0.0169069	0.00199556	0.000486209	0.000287664	0.999991	0.149794	0.215027	0.0321988	0.905414	0.999965	0.239721	0.0791221	0.0217502	0.0115874	0.0034676	40	14	14	14	21	8	7	8	8	15	19	0.329212	0.614633
INPP1	inositol polyphosphate-1-phosphatase	coding	steelblue	0.00625041	-0.216409	0.327223	-0.715944	0.0528898	0.29694	0.872873	0.975352	0.939791	0.787851	0.549247	0.969466	0.457415	0.253455	0.00397937	0.819888	0.475099	0.0103232	3.6746e-05	0.000521317	0.000486587	0.0148626	0.999991	0.51856	0.310405	0.0387131	0.849167	0.999965	0.0982526	0.00413542	0.0118543	0.0115874	0.0546332	40	14	14	14	21	8	7	8	8	15	19	0.157375	0.379889
COPB1	COPI coat complex subunit beta 1	coding	yellow	-0.0266728	-0.894162	-0.836138	-0.226195	-0.85679	-0.229459	-0.861693	-0.84299	-0.845701	-0.787773	-0.540483	0.870224	1.60972e-05	0.000194432	0.436806	7.10822e-07	0.584628	0.012665	0.00857294	0.00815392	0.000487654	0.0168873	0.999991	7.06276e-05	0.000571633	0.611199	4.91704e-06	0.999965	0.0982526	0.0532179	0.0444424	0.011591	0.0595648	40	14	14	14	21	8	7	8	8	15	19	1.05316	1.27579
SNHG20	small nucleolar RNA host gene 20	noncoding	yellow	-0.0153672	-0.90049	-0.90625	0.264523	-0.849532	-0.311766	-0.906439	-0.930008	-0.888711	-0.787649	-0.510994	0.925018	1.12779e-05	7.98785e-06	0.360767	1.10361e-06	0.452213	0.00488736	0.000812824	0.00316465	0.000489342	0.0253589	0.999991	5.31922e-05	4.28538e-05	0.540893	6.55476e-06	0.999965	0.0982526	0.0157158	0.0271272	0.0115912	0.0786326	40	14	14	14	21	8	7	8	8	15	19	-0.833159	-1.23934
DNASE1L1	deoxyribonuclease 1 like 1	coding	blue	0.0172899	0.616408	0.798633	-0.584618	0.674111	-0.0426071	0.835217	0.897388	0.929723	0.787638	0.730329	0.915669	0.0188943	0.000614138	0.0281114	0.0008054	0.920208	0.0193321	0.00249745	0.000822641	0.000489496	0.000384357	0.999991	0.0301626	0.00151232	0.113401	0.00164236	0.999965	0.103087	0.0265707	0.0145388	0.0115912	0.00425214	40	14	14	14	21	8	7	8	8	15	19	0.958238	0.661662
C2CD4B	C2 calcium dependent domain containing 4B	coding	darkgrey	0.00748229	0.212222	0.147131	0.0414736	0.17264	-0.928682	-0.861403	-0.932107	-0.926623	-0.787476	-0.368071	0.963452	0.466375	0.615714	0.888051	0.454257	0.000859025	0.0127293	0.000743071	0.000934123	0.000491728	0.121026	0.999991	0.527158	0.669968	0.933062	0.510268	0.327515	0.0982526	0.0149258	0.0150089	0.0116222	0.240625	40	14	14	14	21	8	7	8	8	15	19	-1.27567	-0.796096
XYLT2	xylosyltransferase 2	coding	yellow	-0.0226361	-0.754179	-0.813407	0.392623	-0.725159	-0.903111	-0.865113	-0.96204	-0.957536	-0.787214	-0.690363	0.889734	0.00183124	0.000402319	0.164949	0.000199739	0.00211185	0.0119194	0.000132879	0.000185376	0.000495339	0.00106874	0.999991	0.00376644	0.00105832	0.334259	0.000470247	0.434403	0.0982526	0.00658921	0.00759529	0.0116784	0.00886756	40	14	14	14	21	8	7	8	8	15	19	0.402834	0.141157
ACOT13	acyl-CoA thioesterase 13	coding	red	0.0241333	-0.263435	-0.742268	0.675788	-0.485552	-0.108744	0.77469	0.815754	0.781113	0.78717	0.597076	0.88249	0.362818	0.00236463	0.00798065	0.025657	0.797706	0.0408194	0.0135552	0.0221024	0.000495952	0.0069528	0.999991	0.423079	0.00480025	0.056472	0.0379854	0.999965	0.152805	0.0693049	0.0840065	0.0116784	0.0326106	40	14	14	14	21	8	7	8	8	15	19	-0.667901	-0.576198
TMEM189			lightcyan	-0.0206667	-0.62629	-0.648737	-0.132516	-0.643649	-0.00734499	0.872167	0.820399	0.927811	0.786988	0.762932	0.899275	0.0165608	0.0120761	0.651556	0.0016425	0.986229	0.0104628	0.0126023	0.000890317	0.000498468	0.000145228	0.999991	0.0267823	0.0205632	0.783298	0.00312558	0.999965	0.0982526	0.0667043	0.0147994	0.0117159	0.00218361	40	14	14	14	21	8	7	8	8	15	19	0.79524	0.566682
FGFR3	fibroblast growth factor receptor 3	coding	blue	-7.88504e-05	0.94515	0.983768	-0.660917	0.896923	0.186817	0.86324	0.88649	0.853075	0.786691	0.415936	0.999615	3.49109e-07	2.55021e-10	0.0100702	3.67885e-08	0.657783	0.0123245	0.0033521	0.00708115	0.000502619	0.0765262	0.999991	3.59227e-06	2.40652e-08	0.0643437	1.32035e-06	0.999965	0.0982526	0.0311901	0.0413931	0.0117915	0.172103	40	14	14	14	21	8	7	8	8	15	19	0.70856	0.659141
NEAT1	nuclear paraspeckle assembly transcript 1	noncoding	blue	-0.0105444	-0.0239398	0.0713593	0.195379	0.0931281	-0.31881	0.706152	0.858653	0.8619	0.786621	0.645778	0.948512	0.935256	0.808457	0.503251	0.688046	0.441501	0.0761612	0.00633268	0.00592136	0.000503602	0.00282088	0.999991	0.94709	0.841602	0.667115	0.732228	0.999965	0.228701	0.0445366	0.0375684	0.0117927	0.0176062	40	14	14	14	21	8	7	8	8	15	19	2.98807	3.27353
HNRNPA0	heterogeneous nuclear ribonucleoprotein A0	coding	skyblue	-0.00474545	0.12166	0.391769	-0.432205	0.218709	-0.683734	-0.839239	-0.93897	-0.833533	-0.786418	-0.631093	0.976816	0.678645	0.165951	0.122742	0.340853	0.0615131	0.0182155	0.000542593	0.0101406	0.000506463	0.00376076	0.999991	0.727428	0.214084	0.276464	0.395421	0.999965	0.101711	0.0128245	0.0505231	0.0118079	0.0212298	40	14	14	14	21	8	7	8	8	15	19	0.968718	1.0425
ADGRL4	adhesion G protein-coupled receptor L4	coding	yellow	-0.0277728	-0.873083	-0.885434	0.279762	-0.834009	0.161232	-0.769596	-0.869998	-0.864486	-0.786384	-0.643482	0.864921	4.5652e-05	2.53945e-05	0.332689	2.63112e-06	0.702889	0.0430383	0.00497108	0.00560633	0.000506942	0.00295345	0.999991	0.000164013	0.000107792	0.514876	1.22951e-05	0.999965	0.157562	0.0383756	0.0365611	0.0118079	0.0181469	40	14	14	14	21	8	7	8	8	15	19	0.997534	1.04657
ZNF395	zinc finger protein 395	coding	tan	0.0162233	0.910984	0.920225	-0.0838537	0.867999	0.0154891	-0.893917	-0.837779	-0.915018	-0.786376	-0.55269	0.920854	5.91539e-06	3.12791e-06	0.775643	3.43047e-07	0.970963	0.006644	0.00941606	0.00143822	0.000507052	0.0141226	0.999991	3.18789e-05	2.03967e-05	0.865471	3.16709e-06	0.999965	0.0982526	0.0564027	0.0187874	0.0118079	0.0525928	40	14	14	14	21	8	7	8	8	15	19	0.305892	0.530454
RHOT2	ras homolog family member T2	coding	yellow	-0.0333067	-0.82896	-0.862914	0.376092	-0.675454	0.107926	-0.74523	-0.943917	-0.921155	-0.78617	-0.692694	0.838333	0.000247364	7.08475e-05	0.185072	0.000779055	0.799205	0.0545536	0.000422649	0.00115403	0.000509966	0.00101126	0.999991	0.000676569	0.000247068	0.358381	0.00159301	0.999965	0.184644	0.0114285	0.0167127	0.0118539	0.00850792	40	14	14	14	21	8	7	8	8	15	19	0.626427	0.498559
ZFAND2B	zinc finger AN1-type containing 2B	coding	blue	0.0186493	0.878617	0.891358	0.280349	0.830872	0.264539	0.894553	0.915125	0.989124	0.785838	0.677474	0.909065	3.53763e-05	1.87134e-05	0.331632	3.10281e-06	0.526644	0.00654716	0.00143292	3.18965e-06	0.000514679	0.00143838	0.999991	0.000133135	8.39712e-05	0.513845	1.3923e-05	0.999965	0.0982526	0.0203069	0.00257874	0.0119319	0.0109436	40	14	14	14	21	8	7	8	8	15	19	0.151397	0.334687
HOMER3	homer scaffold protein 3	coding	yellow	-0.0196883	-0.825981	-0.891754	0.504297	-0.829502	-0.283371	-0.863508	-0.95354	-0.95308	-0.785765	-0.591985	0.904022	0.000272498	1.83243e-05	0.0659343	3.331e-06	0.496437	0.0122661	0.000242054	0.000249239	0.00051573	0.00757951	0.999991	0.000736425	8.25473e-05	0.188544	1.46506e-05	0.999965	0.0982526	0.00885094	0.00849497	0.0119319	0.0345629	40	14	14	14	21	8	7	8	8	15	19	0.208864	-0.321639
AVL9	AVL9 cell migration associated	coding	yellow	-0.0179076	-0.827081	-0.828398	0.326472	-0.737612	0.556043	-0.888059	-0.957867	-0.931498	-0.785735	-0.635795	0.912667	0.000262989	0.000251961	0.25461	0.000135694	0.152386	0.00757489	0.000181125	0.000762905	0.000516155	0.00343526	0.999991	0.000714238	0.000708168	0.435662	0.000333463	0.999965	0.0982526	0.00769976	0.0139717	0.0119319	0.0201292	40	14	14	14	21	8	7	8	8	15	19	0.235817	0.207377
MIR100HG	mir-100-let-7a-2-mir-125b-1 cluster host gene	noncoding	pink	-0.0115693	-0.855167	-0.854479	-0.208686	-0.824684	0.523777	0.9356	0.970414	0.856245	0.785547	0.875486	0.943515	9.68172e-05	9.94536e-05	0.474006	4.25481e-06	0.182753	0.00195216	6.33175e-05	0.0066492	0.000518849	9.16592e-07	0.999991	0.000308454	0.000327368	0.642673	1.77623e-05	0.999965	0.0982526	0.00473757	0.0397349	0.0119723	6.6611e-05	40	14	14	14	21	8	7	8	8	15	19	-0.176551	-0.489916
KLHDC10	kelch domain containing 10	coding	blue	0.0455722	0.582024	0.560427	0.00630104	0.561049	0.873429	0.803943	0.903837	0.850209	0.785409	0.509272	0.780069	0.028989	0.0371095	0.982944	0.00814342	0.0046002	0.0293227	0.00206587	0.00748666	0.000520847	0.0259411	0.999991	0.0444323	0.0562789	0.989675	0.0134185	0.560076	0.124467	0.0244076	0.0425536	0.0119966	0.0798308	40	14	14	14	21	8	7	8	8	15	19	0.590469	0.530454
EYA3	EYA transcriptional coactivator and phosphatase 3	coding	pink	-0.0293031	-0.963299	-0.934733	-0.551338	-0.889921	0.876716	0.846142	0.913209	0.877618	0.785267	0.501314	0.857553	3.25961e-08	9.68597e-07	0.0409859	6.67742e-08	0.00426203	0.0163866	0.00152986	0.00417213	0.000522894	0.0287687	0.999991	6.65588e-07	8.17072e-06	0.141564	1.50293e-06	0.539326	0.0989261	0.0210044	0.031049	0.0120067	0.0859236	40	14	14	14	21	8	7	8	8	15	19	0.518958	0.454481
TBC1D32	TBC1 domain family member 32	coding	blue	0.0273209	0.817818	0.750516	0.318761	0.78965	0.69725	0.89017	0.914129	0.84948	0.785243	0.478374	0.867099	0.000352088	0.00198391	0.266659	2.07446e-05	0.0545749	0.00723128	0.00148278	0.00759204	0.000523236	0.0382813	0.999991	0.000915857	0.00413084	0.44737	6.49296e-05	0.999965	0.0982526	0.0207351	0.0427623	0.0120067	0.10437	40	14	14	14	21	8	7	8	8	15	19	-1.13422	-0.241126
APMAP	adipocyte plasma membrane associated protein	coding	yellow	-0.0151058	-0.588815	-0.639455	0.447066	-0.613941	-0.218609	-0.782775	-0.886129	-0.825566	-0.785181	-0.5465	0.92629	0.0267335	0.0138002	0.108995	0.00307138	0.60298	0.0374302	0.00338322	0.0115936	0.000524134	0.0154752	0.999991	0.0412988	0.0231437	0.25776	0.00553953	0.999965	0.144781	0.0313413	0.0549273	0.0120067	0.056286	40	14	14	14	21	8	7	8	8	15	19	0.910792	0.865661
AL365205.1			blue	0.0141972	0.877407	0.827475	0.557807	0.798255	0.00587534	0.837937	0.99359	0.968861	0.784815	0.625624	0.930713	3.7444e-05	0.000259646	0.0381981	1.44641e-05	0.988984	0.0185728	6.55295e-07	7.37297e-05	0.000529463	0.00417076	0.999991	0.000139382	0.000727019	0.134798	4.79436e-05	0.999965	0.102004	0.00165724	0.0056259	0.0120856	0.022721	40	14	14	14	21	8	7	8	8	15	19	-0.689115	-0.796096
ARHGDIA	Rho GDP dissociation inhibitor alpha	coding	yellow	-0.00632546	-0.885529	-0.84237	-0.571366	-0.837146	-0.0816101	-0.867067	-0.9734	-0.956555	-0.784813	-0.825693	0.9691	2.52741e-05	0.000156289	0.0328109	2.22358e-06	0.847659	0.011505	4.6117e-05	0.00019838	0.00052949	1.33871e-05	0.999991	0.000101008	0.000476899	0.124346	1.08981e-05	0.999965	0.0982526	0.0045062	0.0077185	0.0120856	0.000430269	40	14	14	14	21	8	7	8	8	15	19	1.16885	0.985496
ABCG1	ATP binding cassette subfamily G member 1	coding	blue	0.00280537	0.840654	0.658174	0.634884	0.693063	-0.232428	0.786737	0.846713	0.893495	0.784718	0.715861	0.986293	0.000166121	0.0104977	0.0147155	0.000495708	0.579639	0.0358288	0.00800096	0.00278419	0.000530881	0.000567401	0.999991	0.00048524	0.0181617	0.0791841	0.0010599	0.999965	0.140657	0.050994	0.0253463	0.0120955	0.00564944	40	14	14	14	21	8	7	8	8	15	19	0.382023	0.117413
PARM1	prostate androgen-regulated mucin-like protein 1	coding	blue	0.0107044	0.95663	0.956786	-0.505645	0.90237	0.407248	0.888761	0.91714	0.813115	0.784368	0.487269	0.947732	8.74816e-08	8.56349e-08	0.0650965	2.24495e-08	0.316637	0.00745947	0.00133534	0.0141162	0.000536037	0.0343413	0.999991	1.33761e-06	1.32378e-06	0.187036	1.23769e-06	0.999965	0.0982526	0.019597	0.0623251	0.0121716	0.0972201	40	14	14	14	21	8	7	8	8	15	19	0.490897	0.117413
PHLDB2	pleckstrin homology like domain family B member 2	coding	brown	0.00843992	-0.758968	-0.35591	-0.697468	-0.52524	-0.152249	-0.880793	-0.946132	-0.814219	-0.78434	-0.502697	0.958778	0.0016459	0.211689	0.00555435	0.0144838	0.718914	0.00882864	0.000375163	0.0138798	0.000536439	0.0282611	0.999991	0.00343951	0.265398	0.0459051	0.0225941	0.999965	0.0982526	0.0107329	0.0616684	0.0121716	0.0848839	40	14	14	14	21	8	7	8	8	15	19	0.676927	0.750585
DSN1	DSN1 component of MIS12 kinetochore complex	coding	brown	-0.0161787	-0.974276	-0.959481	-0.587497	-0.891295	-0.251813	-0.861829	-0.884758	-0.901263	-0.784295	-0.708454	0.921071	3.95784e-09	5.8534e-08	0.0271607	5.95936e-08	0.54743	0.0126347	0.00350314	0.00223178	0.000537111	0.000686538	0.999991	1.61442e-07	9.88201e-07	0.111338	1.46034e-06	0.999965	0.0982526	0.0318532	0.022813	0.0121716	0.00648409	40	14	14	14	21	8	7	8	8	15	19	-0.833159	-0.523003
STXBP1	syntaxin binding protein 1	coding	blue	0.00699189	0.515732	0.685406	-0.525808	0.590326	0.398106	0.891758	0.976707	0.93549	0.784039	0.600708	0.965846	0.0590697	0.00681975	0.053461	0.00484359	0.328671	0.0069788	3.10473e-05	0.000639104	0.000540907	0.00653192	0.999991	0.0843234	0.0123211	0.165405	0.00834771	0.999965	0.0982526	0.0039175	0.0127863	0.0122082	0.0310838	40	14	14	14	21	8	7	8	8	15	19	0.79524	0.782453
FAM160A2			blue	-0.012341	0.896578	0.769453	0.714766	0.767293	0.715746	0.638381	0.899625	0.890126	0.784022	0.498297	0.939754	1.409e-05	0.00129196	0.00406787	4.92634e-05	0.045874	0.122833	0.00234176	0.00304883	0.000541165	0.0299016	0.999991	6.32248e-05	0.00285309	0.038744	0.000136639	0.999965	0.307957	0.0258842	0.0266615	0.0122082	0.0882314	40	14	14	14	21	8	7	8	8	15	19	0.465321	0.395542
ANGPT2	angiopoietin 2	coding	yellow	-0.0113617	-0.886621	-0.899756	0.036734	-0.899972	-0.278887	-0.863781	-0.980724	-0.914232	-0.783927	-0.542971	0.944527	2.39203e-05	1.1767e-05	0.900783	2.79983e-08	0.503568	0.0122066	1.76474e-05	0.00147757	0.000542567	0.0162914	0.999991	9.66364e-05	5.80319e-05	0.942161	1.26295e-06	0.999965	0.0982526	0.00359921	0.0190926	0.0122082	0.0582099	40	14	14	14	21	8	7	8	8	15	19	-0.553251	-0.458505
FJX1	four-jointed box kinase 1	coding	yellow	-0.0176066	-0.969792	-0.977101	0.305279	-0.871644	0.0710844	-0.833538	-0.928912	-0.885212	-0.783894	-0.710454	0.91413	1.0278e-08	1.98125e-09	0.288528	2.66844e-07	0.867165	0.0198093	0.000850923	0.00346315	0.000543071	0.000652473	0.999991	2.97403e-07	1.00614e-07	0.470217	2.72116e-06	0.999965	0.10398	0.015917	0.0280699	0.0122082	0.00625039	40	14	14	14	21	8	7	8	8	15	19	-0.571024	-0.359624
DGUOK	deoxyguanosine kinase	coding	yellow	-0.0333701	-0.828509	-0.880936	0.466574	-0.849048	-0.320521	-0.845993	-0.853863	-0.878871	-0.783793	-0.583814	0.838029	0.00025105	3.16737e-05	0.0926066	1.13555e-06	0.438914	0.0164248	0.00697217	0.00404919	0.000544572	0.0086808	0.999991	0.000685495	0.000128288	0.232528	6.70645e-06	0.999965	0.0989261	0.0470624	0.0305684	0.0122082	0.0380326	40	14	14	14	21	8	7	8	8	15	19	-0.440708	-0.372821
NDUFA8	NADH:ubiquinone oxidoreductase subunit A8	coding	red	0.00877659	-0.545341	-0.473511	-0.413309	-0.463946	-0.23333	0.643754	0.905085	0.875932	0.78378	0.583758	0.957135	0.0437017	0.0872171	0.141857	0.0341296	0.578126	0.118709	0.00198842	0.00434117	0.000544763	0.00868882	0.999991	0.0643841	0.120703	0.303516	0.0493053	0.999965	0.301907	0.0240839	0.0316758	0.0122082	0.0380437	40	14	14	14	21	8	7	8	8	15	19	0.0113847	0.0470027
S100A2	S100 calcium binding protein A2	coding	red	-1.74977e-06	-0.749975	-0.695795	0.0603276	-0.692603	-0.234629	0.887568	0.858925	0.812251	0.783732	0.471186	0.999991	0.00200729	0.00571795	0.837678	0.000501792	0.575949	0.0076561	0.00629752	0.014303	0.000545481	0.0417124	0.999991	0.00407483	0.0105519	0.905182	0.00107128	0.999965	0.0982526	0.0444819	0.0628428	0.0122082	0.110926	40	14	14	14	21	8	7	8	8	15	19	-1.45613	-2.18585
POM121	POM121 transmembrane nucleoporin	coding	skyblue	-0.0101516	-0.473737	0.0284389	-0.63042	-0.212301	-0.415437	-0.880467	-0.865024	-0.744517	-0.783531	-0.470717	0.950428	0.0870456	0.923119	0.0156533	0.355535	0.306039	0.00888754	0.00554207	0.0341095	0.00054851	0.0419441	0.999991	0.119187	0.938192	0.0816656	0.410608	0.999965	0.0982526	0.0412216	0.11272	0.0122543	0.111254	40	14	14	14	21	8	7	8	8	15	19	0.266768	-0.169875
SERPINB6	serpin family B member 6	coding	blue	0.0168086	-0.0398772	-0.365094	0.34353	-0.194004	-0.399228	0.87005	0.948909	0.893402	0.783417	0.791665	0.918008	0.892337	0.199295	0.229146	0.399426	0.327182	0.0108885	0.000320755	0.00279129	0.000550227	5.38502e-05	0.999991	0.911364	0.251782	0.407761	0.455021	0.999965	0.0982526	0.00984454	0.0253744	0.0122709	0.00111264	40	14	14	14	21	8	7	8	8	15	19	1.19638	1.22821
ZNF217	zinc finger protein 217	coding	grey60	-0.00516878	0.499925	0.574146	-0.0256597	0.502349	0.529123	-0.82822	-0.881249	-0.923915	-0.782744	-0.604304	0.974748	0.0687032	0.0317799	0.930615	0.0203017	0.177515	0.0213651	0.00382251	0.00103925	0.000560443	0.00613606	0.999991	0.0966246	0.0489951	0.959839	0.0307443	0.999965	0.106783	0.0332346	0.0157381	0.0124555	0.0297054	40	14	14	14	21	8	7	8	8	15	19	0.640848	0.43303
PCF11	PCF11 cleavage and polyadenylation factor subunit	coding	blue	0.0264147	0.826413	0.855363	-0.345744	0.851361	0.908732	0.829955	0.906709	0.955744	0.782742	0.639813	0.87147	0.000268729	9.60761e-05	0.22596	9.89941e-07	0.0017729	0.0208501	0.00189048	0.000209569	0.000560471	0.00317596	0.999991	0.000727953	0.0003187	0.40454	6.10625e-06	0.422988	0.105671	0.0235287	0.00794613	0.0124555	0.0190512	40	14	14	14	21	8	7	8	8	15	19	0.857606	1.13821
CYP2U1	cytochrome P450 family 2 subfamily U member 1	coding	blue	0.0130093	0.87075	0.960625	0.49509	0.868298	0.0502133	0.804973	0.833655	0.877014	0.782507	0.764979	0.936498	5.06571e-05	4.94157e-08	0.0718612	3.36141e-07	0.906008	0.0289561	0.0101193	0.00423218	0.000564084	0.00013594	0.999991	0.000179479	8.76384e-07	0.198232	3.13922e-06	0.999965	0.123574	0.0588834	0.0312444	0.012498	0.00208107	40	14	14	14	21	8	7	8	8	15	19	0.203338	0.42202
PCDH19	protocadherin 19	coding	grey60	-0.0183847	0.482987	-0.0510401	0.480953	0.204436	-0.152806	-0.84183	-0.818272	-0.852535	-0.782489	-0.53839	0.91035	0.0802157	0.862431	0.0816835	0.374047	0.717917	0.017516	0.0130333	0.00715644	0.00056436	0.0174019	0.999991	0.110843	0.887487	0.21473	0.429359	0.999965	0.100941	0.0677927	0.0416422	0.012498	0.0610224	40	14	14	14	21	8	7	8	8	15	19	-1.52927	-0.880804
PTPRF	protein tyrosine phosphatase receptor type F	coding	brown	-0.0919061	-0.520917	0.153627	-0.391108	-0.114095	-0.324928	-0.819748	-0.939662	-0.89206	-0.782147	-0.553633	0.572734	0.0561326	0.60003	0.16673	0.622403	0.432283	0.0239813	0.000524628	0.00289502	0.000569639	0.013925	0.999991	0.0805397	0.655837	0.336575	0.671813	0.999965	0.112437	0.0126602	0.0258893	0.0125782	0.0520486	40	14	14	14	21	8	7	8	8	15	19	2.00448	1.75789
FHDC1	FH2 domain containing 1	coding	blue	0.015463	0.969703	0.969905	-0.49117	0.832992	-0.140829	0.856737	0.917725	0.942285	0.782091	0.586248	0.924552	1.04597e-08	1.00524e-08	0.0744959	2.77661e-06	0.739416	0.0137916	0.00130785	0.000460063	0.000570518	0.00833997	0.999991	2.98563e-07	2.96298e-07	0.202522	1.27859e-05	0.999965	0.0982526	0.0194333	0.0112335	0.0125782	0.0369762	40	14	14	14	21	8	7	8	8	15	19	0.126926	-0.114707
MEF2D	myocyte enhancer factor 2D	coding	tan	0.0148364	0.899976	0.796141	0.637796	0.846972	0.346457	-0.865414	-0.898899	-0.883719	-0.78203	-0.62038	0.927601	1.16188e-05	0.000657342	0.0141273	1.28188e-06	0.400504	0.011855	0.00239153	0.00359582	0.000571463	0.00459786	0.999991	5.44145e-05	0.00160558	0.0772574	7.29497e-06	0.999965	0.0982526	0.0260697	0.0286871	0.0125782	0.0242756	40	14	14	14	21	8	7	8	8	15	19	0.977325	1.11321
CC2D2B	coiled-coil and C2 domain containing 2B	coding	blue	0.00491186	0.889659	0.930486	0.179909	0.872933	0.21997	0.836036	0.872423	0.98074	0.781889	0.831306	0.976003	2.04613e-05	1.40066e-06	0.538255	2.43725e-07	0.600668	0.0191015	0.00470703	1.76049e-05	0.000573656	1.0343e-05	0.999991	8.57302e-05	1.07799e-05	0.695792	2.59856e-06	0.999965	0.102695	0.0373637	0.00357067	0.0125782	0.000359039	40	14	14	14	21	8	7	8	8	15	19	-0.455653	0.191473
CD2AP	CD2 associated protein	coding	brown	-0.0106515	-0.111447	0.170394	-0.584616	-0.0302003	-0.133442	-0.883496	-0.958556	-0.802749	-0.78186	-0.537154	0.94799	0.704462	0.560297	0.0281121	0.896606	0.752751	0.0083493	0.00017247	0.0164601	0.000574107	0.0177115	0.999991	0.751217	0.617533	0.113401	0.912996	0.999965	0.0982526	0.00757252	0.0685791	0.0125782	0.0616147	40	14	14	14	21	8	7	8	8	15	19	0.291492	0.761391
TWSG1	twisted gastrulation BMP signaling modulator 1	coding	brown	-0.0101665	-0.258103	-0.0672401	-0.299043	-0.151597	-0.0779296	-0.919844	-0.832436	-0.790415	-0.78186	-0.519837	0.950355	0.372968	0.819343	0.298986	0.511842	0.854472	0.00334495	0.0103333	0.0195493	0.00057411	0.0225294	0.999991	0.433313	0.850693	0.481312	0.566003	0.999965	0.0982526	0.0594202	0.0772454	0.0125782	0.072416	40	14	14	14	21	8	7	8	8	15	19	0.529179	0.893979
ARHGAP28	Rho GTPase activating protein 28	coding	grey60	-0.0130832	0.590424	0.601734	0.144506	0.561558	0.0593427	-0.847226	-0.88282	-0.95719	-0.781807	-0.784183	0.936138	0.026219	0.0228085	0.622095	0.00807342	0.888993	0.0161093	0.00367729	0.000189897	0.000574946	7.07112e-05	0.999991	0.0405701	0.0362555	0.760406	0.013317	0.999965	0.0985974	0.0325398	0.00759529	0.0125782	0.00135682	40	14	14	14	21	8	7	8	8	15	19	0.472731	0.828343
ZYX	zyxin	coding	brown	-0.00535121	-0.742357	-0.237791	-0.676762	-0.461564	0.00584578	-0.883626	-0.953655	-0.872631	-0.78171	-0.778587	0.973857	0.00236025	0.413002	0.00785651	0.0351839	0.989039	0.00832651	0.000240281	0.00468481	0.000576452	8.61055e-05	0.999991	0.00469193	0.474765	0.0562976	0.050724	0.999965	0.0982526	0.00885094	0.0331208	0.012579	0.00153353	40	14	14	14	21	8	7	8	8	15	19	1.69056	1.56666
NT5DC2	5'-nucleotidase domain containing 2	coding	yellow	-0.0107825	-0.91383	-0.959626	0.500037	-0.867027	-0.195	-0.806564	-0.946395	-0.883681	-0.781677	-0.802789	0.947351	4.89852e-06	5.73073e-08	0.0686311	3.66354e-07	0.643537	0.0283949	0.000369761	0.0035993	0.000576972	3.51797e-05	0.999991	2.76526e-05	9.72707e-07	0.193556	3.30189e-06	0.999965	0.12221	0.0107239	0.0286968	0.012579	0.00082994	40	14	14	14	21	8	7	8	8	15	19	0.410977	-0.21992
MGAT4B	alpha-1,3-mannosyl-glycoprotein 4-beta-N-acetylglucosaminyltransferase B	coding	yellow	-0.0335467	-0.899272	-0.92237	0.207715	-0.88087	-0.279735	-0.717716	-0.832475	-0.802537	-0.781534	-0.627966	0.837183	1.20995e-05	2.66881e-06	0.476112	1.36385e-07	0.502217	0.0693625	0.0103265	0.0165104	0.000579222	0.00399091	0.999991	5.60843e-05	1.79984e-05	0.644241	1.8965e-06	0.999965	0.214973	0.0594146	0.0687435	0.0125856	0.0220661	40	14	14	14	21	8	7	8	8	15	19	1.06822	0.598129
FIBP	FGF1 intracellular binding protein	coding	yellow	-0.0264336	-0.814196	-0.875413	0.477176	-0.827969	0.19615	-0.770077	-0.929335	-0.941353	-0.781531	-0.872424	0.871379	0.000392936	4.10651e-05	0.0844601	3.6036e-06	0.641543	0.0428261	0.000836082	0.00048237	0.000579268	1.11471e-06	0.999991	0.00100581	0.000157689	0.21908	1.56106e-05	0.999965	0.157278	0.0158263	0.0114457	0.0125856	7.6606e-05	40	14	14	14	21	8	7	8	8	15	19	0.666035	0.281301
KCND1	potassium voltage-gated channel subfamily D member 1	coding	blue	0.0234943	0.904451	0.921487	-0.382447	0.879462	0.0315868	0.816017	0.892697	0.927855	0.781364	0.74112	0.88558	8.91717e-06	2.8505e-06	0.177158	1.51619e-07	0.940814	0.0251881	0.00284545	0.000888718	0.00058189	0.000282882	0.999991	4.40115e-05	1.89409e-05	0.349098	1.99773e-06	0.999965	0.115316	0.0285894	0.0147994	0.0126209	0.00342672	40	14	14	14	21	8	7	8	8	15	19	-0.22795	-0.105971
SPTAN1	spectrin alpha, non-erythrocytic 1	coding	blue	0.0288887	0.889364	0.889272	-0.336112	0.404359	-0.693754	0.86716	0.932507	0.861164	0.781072	0.575458	0.859547	2.07787e-05	2.08782e-05	0.240017	0.0690508	0.0563223	0.0114856	0.000730238	0.00601302	0.000586526	0.0099378	0.999991	8.67724e-05	9.22333e-05	0.420188	0.0935148	0.999965	0.0982526	0.0147742	0.0377531	0.0126957	0.0414404	40	14	14	14	21	8	7	8	8	15	19	2.86156	2.8399
GPER1	G protein-coupled estrogen receptor 1	coding	blue	0.0156876	0.724832	0.842669	-0.546991	0.744989	-0.458444	0.819986	0.93423	0.946789	0.78102	0.633002	0.92346	0.00335936	0.00015462	0.0429416	0.000106829	0.253264	0.0239055	0.00067663	0.000361774	0.000587344	0.00362568	0.999991	0.0064042	0.00047272	0.145693	0.000269095	0.999965	0.112248	0.0142386	0.0100509	0.0126957	0.0207827	40	14	14	14	21	8	7	8	8	15	19	-0.110738	-0.0640479
IRAK4	interleukin 1 receptor associated kinase 4	coding	blue	0.0233888	0.842272	0.829473	0.185347	0.827475	0.513045	0.900511	0.946003	0.933621	0.780862	0.728566	0.88609	0.000156835	0.000243231	0.525831	3.69553e-06	0.193512	0.00567986	0.000377833	0.000695262	0.000589864	0.000403555	0.999991	0.000462386	0.000688683	0.685596	1.59379e-05	0.999965	0.0982526	0.0107606	0.0132831	0.0127284	0.0044105	40	14	14	14	21	8	7	8	8	15	19	0.157375	0.227968
HS2ST1	heparan sulfate 2-O-sulfotransferase 1	coding	grey	0.00926601	-0.113652	-0.132661	-0.027669	-0.120748	-0.154988	0.917909	0.804617	0.849189	0.780688	0.605197	0.954747	0.698863	0.651195	0.925195	0.60211	0.714017	0.00354665	0.0160211	0.00763447	0.000592653	0.00604081	0.999991	0.745938	0.702411	0.956355	0.652583	0.999965	0.0982526	0.0766792	0.0427786	0.0127424	0.0294019	40	14	14	14	21	8	7	8	8	15	19	-0.138141	0.391666
RHBDD1	rhomboid domain containing 1	coding	blue	0.0491298	0.907968	0.887523	-0.0976092	0.852857	0.0162694	0.901075	0.921007	0.783223	0.780633	0.404845	0.763374	7.17625e-06	2.28468e-05	0.739917	9.04753e-07	0.9695	0.00560159	0.00116044	0.0215061	0.000593521	0.0855441	0.999991	3.70836e-05	9.87938e-05	0.842602	5.74521e-06	0.999965	0.0982526	0.0184343	0.0826013	0.0127424	0.186791	40	14	14	14	21	8	7	8	8	15	19	0.192145	0.238012
CYB561	cytochrome b561	coding	grey	0.0085211	-0.0685291	0.145842	-0.267196	0.0693291	0.360641	-0.881394	-0.968252	-0.990006	-0.780632	-0.920369	0.958382	0.815933	0.618846	0.35575	0.765237	0.380142	0.00872074	7.81059e-05	2.47655e-06	0.000593537	2.40036e-08	0.999991	0.846736	0.672681	0.536041	0.801161	0.999965	0.0982526	0.00493627	0.00257874	0.0127424	4.4029e-06	40	14	14	14	21	8	7	8	8	15	19	0.605691	0.828343
PLEKHF1	pleckstrin homology and FYVE domain containing 1	coding	red	-0.00572415	-0.472531	-0.567601	0.290625	-0.504121	0.365736	0.871383	0.861882	0.826194	0.780499	0.552425	0.972036	0.0879651	0.0342462	0.313448	0.0197934	0.372944	0.0106194	0.00592357	0.0114744	0.000595688	0.0141783	0.999991	0.120342	0.0524202	0.495341	0.030061	0.999965	0.0982526	0.0427086	0.0545609	0.0127512	0.0527309	40	14	14	14	21	8	7	8	8	15	19	-0.667901	-0.823067
PDGFRL	platelet derived growth factor receptor like	coding	yellow	-0.0174643	-0.854194	-0.824183	-0.0640794	-0.841515	-0.390543	-0.872754	-0.92783	-0.864589	-0.78037	-0.529372	0.914821	0.000100561	0.000288635	0.827716	1.74846e-06	0.338784	0.0103466	0.000889625	0.005594	0.00059776	0.0197635	0.999991	0.000318137	0.000797072	0.8998	9.05128e-06	0.999965	0.0982526	0.0162797	0.0365373	0.0127512	0.0663348	40	14	14	14	21	8	7	8	8	15	19	-1.39032	-1.97716
PPP4C	protein phosphatase 4 catalytic subunit	coding	yellow	-0.0239573	-0.911601	-0.915549	-0.0816786	-0.888153	-0.215839	-0.868835	-0.968768	-0.919421	-0.780367	-0.571878	0.883341	5.68132e-06	4.35715e-06	0.781332	7.71384e-08	0.607695	0.0111373	7.43905e-05	0.00123023	0.000597803	0.0105194	0.999991	3.10325e-05	2.66195e-05	0.869119	1.57072e-06	0.999965	0.0982526	0.00490513	0.0173258	0.0127512	0.0429789	40	14	14	14	21	8	7	8	8	15	19	0.590469	0.505071
ANGPTL1	angiopoietin like 1	coding	blue	0.0077926	0.975205	0.96175	-0.127832	0.868877	0.350744	0.87867	0.890046	0.834259	0.780356	0.509883	0.961937	3.18068e-09	4.16286e-08	0.663198	3.23122e-07	0.3943	0.00921608	0.00305528	0.0100143	0.00059798	0.0257336	0.999991	1.40646e-07	7.81572e-07	0.791591	3.06748e-06	0.999965	0.0982526	0.0296273	0.0501109	0.0127512	0.0795018	40	14	14	14	21	8	7	8	8	15	19	0.10151	0.295085
DYNLT1	dynein light chain Tctex-type 1	coding	yellow	-0.0362807	-0.891877	-0.890693	-0.262105	-0.700806	-0.277011	-0.790758	-0.929192	-0.948466	-0.780109	-0.879366	0.824115	1.82046e-05	1.93825e-05	0.365336	0.000402331	0.506564	0.0342433	0.000841064	0.000329066	0.000601983	7.10016e-07	0.999991	7.7901e-05	8.65438e-05	0.544262	0.00087806	0.999965	0.137167	0.0158263	0.00973845	0.0128149	5.55149e-05	40	14	14	14	21	8	7	8	8	15	19	-0.0509176	0.351508
R3HDM4	R3H domain containing 4	coding	grey60	0.178727	0.775524	0.39951	0.762367	0.627502	-0.237413	-0.748013	-0.912542	-0.846992	-0.779805	-0.788008	0.269837	0.00111662	0.157004	0.00152363	0.00232608	0.571294	0.0531623	0.00156463	0.00795918	0.000606929	6.16021e-05	0.999991	0.00245436	0.203685	0.024086	0.00428458	0.999965	0.18149	0.0213428	0.0438727	0.0128985	0.00122671	40	14	14	14	21	8	7	8	8	15	19	0.461585	0.334687
OGFRL1	opioid growth factor receptor like 1	coding	yellow	-0.0194415	-0.717853	-0.730194	0.0407966	-0.723681	0.0021748	-0.739933	-0.829831	-0.855999	-0.779673	-0.689192	0.905219	0.00383922	0.00302381	0.889868	0.000208833	0.995922	0.0572552	0.0108004	0.00668206	0.000609093	0.00109864	0.999991	0.00721996	0.00594651	0.934599	0.000489375	0.999965	0.190317	0.0610508	0.0398372	0.0129228	0.00906806	40	14	14	14	21	8	7	8	8	15	19	-0.806853	-0.474012
RAB29	RAB29, member RAS oncogene family	coding	blue	0.00215294	0.743496	0.706454	0.128306	0.694769	-0.0614553	0.75454	0.829251	0.901059	0.779608	0.752943	0.989481	0.00230456	0.00473709	0.662015	0.000473687	0.885061	0.0499769	0.0109061	0.00224529	0.000610154	0.000198729	0.999991	0.00459422	0.00892306	0.791194	0.00101625	0.999965	0.173925	0.0614288	0.022813	0.0129236	0.00266483	40	14	14	14	21	8	7	8	8	15	19	0.37351	0.338935
AC093297.2			blue	-0.0179973	0.73768	0.516396	0.516749	0.596881	0.613603	0.8836	0.915485	0.850972	0.779406	0.537346	0.912231	0.00260011	0.0586874	0.0584851	0.00428303	0.105659	0.00833107	0.00141515	0.00737723	0.000613482	0.0176632	0.999991	0.00511487	0.0849184	0.174817	0.0074733	0.999965	0.0982526	0.0202685	0.0421225	0.0129724	0.0615293	40	14	14	14	21	8	7	8	8	15	19	-0.919052	-0.911822
LRIG1	leucine rich repeats and immunoglobulin like domains 1	coding	tan	0.0363915	0.901558	0.892737	0.313278	0.857331	0.0652798	-0.853342	-0.927929	-0.932861	-0.779111	-0.815444	0.823586	1.05964e-05	1.73865e-05	0.27543	6.87209e-07	0.877948	0.0145953	0.000886021	0.000719008	0.000618357	2.09641e-05	0.999991	5.05011e-05	7.90126e-05	0.456601	4.84181e-06	0.999965	0.0982526	0.0162609	0.0135902	0.0130059	0.000586485	40	14	14	14	21	8	7	8	8	15	19	1.74224	1.10955
GNA11	G protein subunit alpha 11	coding	brown	-0.0102603	-0.883447	-0.758683	-0.606694	-0.786763	-0.357308	-0.70096	-0.994735	-0.868834	-0.77905	-0.589636	0.949897	2.80292e-05	0.00165648	0.0214231	2.33273e-05	0.384885	0.0793245	3.63433e-07	0.00510116	0.000619355	0.0078838	0.999991	0.000110003	0.00353343	0.0974442	7.15448e-05	0.999965	0.235184	0.00165724	0.034665	0.0130059	0.035515	40	14	14	14	21	8	7	8	8	15	19	0.869802	0.826417
UCP2	uncoupling protein 2	coding	red	0.107849	-0.370561	-0.0240433	-0.518686	-0.150235	0.155794	0.884514	0.904904	0.76272	0.779021	0.505357	0.507714	0.192141	0.934977	0.0573833	0.515685	0.712578	0.00817276	0.0019995	0.0277367	0.000619851	0.0273037	0.999991	0.241154	0.94711	0.172765	0.569754	0.999965	0.0982526	0.0241381	0.0980518	0.0130059	0.0827658	40	14	14	14	21	8	7	8	8	15	19	-0.486604	-1.42683
PLEKHJ1	pleckstrin homology domain containing J1	coding	brown	-0.0421507	-0.926179	-0.913619	-0.195206	-0.909263	-0.0187925	-0.85739	-0.879448	-0.775229	-0.778999	-0.659423	0.796217	1.99003e-06	4.96832e-06	0.503639	1.15104e-08	0.964772	0.0136401	0.00399341	0.0238188	0.000620207	0.00213066	0.999991	1.35582e-05	2.93847e-05	0.667489	1.19401e-06	0.999965	0.0982526	0.0338677	0.088302	0.0130059	0.0144153	40	14	14	14	21	8	7	8	8	15	19	-0.196631	-0.372821
RXRA	retinoid X receptor alpha	coding	blue	0.0397939	0.641812	0.620231	0.193977	0.613574	-0.526562	0.85225	0.874906	0.891056	0.778976	0.520624	0.80739	0.0133457	0.0179637	0.506382	0.00309406	0.180014	0.0148593	0.00444619	0.0029742	0.000620599	0.02229	0.999991	0.0220943	0.0292494	0.66993	0.00557644	0.999965	0.0982526	0.0361092	0.0262814	0.0130059	0.0720308	40	14	14	14	21	8	7	8	8	15	19	0.936765	0.614633
DLL1	delta like canonical Notch ligand 1	coding	blue	0.026884	0.976971	0.973561	0.0238982	0.90626	0.42585	0.864957	0.91792	0.906695	0.778937	0.666947	0.869206	2.04929e-09	4.65791e-09	0.935368	1.54963e-08	0.292814	0.0119527	0.00129874	0.00189126	0.00062124	0.00181445	0.999991	1.09339e-07	1.75296e-07	0.962778	1.19401e-06	0.999965	0.0982526	0.0193662	0.0213526	0.0130059	0.0129393	40	14	14	14	21	8	7	8	8	15	19	0.826087	1.08842
APBB2	amyloid beta precursor protein binding family B member 2	coding	yellow	-3.33387e-06	-0.837137	-0.975972	0.770016	-0.807179	0.432243	-0.755341	-0.864793	-0.819598	-0.778843	-0.674009	0.999984	0.000187857	2.63821e-09	0.00127485	9.76949e-06	0.284833	0.0495935	0.0055696	0.0127636	0.000622801	0.00155421	0.999991	0.000537067	1.2077e-07	0.0222966	3.43535e-05	0.999965	0.173139	0.0412823	0.0582444	0.0130171	0.0116267	40	14	14	14	21	8	7	8	8	15	19	0.99254	1.02314
DAPK2	death associated protein kinase 2	coding	orange	-0.00312743	0.11544	-0.479721	0.641839	-0.175899	-0.0863836	-0.925146	-0.952751	-0.847128	-0.778702	-0.625186	0.98472	0.69433	0.0825821	0.0133406	0.44565	0.838835	0.0028272	0.000254446	0.00793872	0.000625159	0.00420516	0.999991	0.741663	0.114841	0.07484	0.501758	0.999965	0.0982526	0.00901931	0.043779	0.0130448	0.0228314	40	14	14	14	21	8	7	8	8	15	19	-2.11274	-1.82128
EPHB4	EPH receptor B4	coding	blue	0.0114794	0.889276	0.835764	0.201468	0.846363	-0.034468	0.877962	0.984128	0.941747	0.778516	0.578368	0.943953	2.0874e-05	0.000196942	0.489768	1.32785e-06	0.935424	0.0093474	9.87774e-06	0.000472851	0.000628284	0.00948436	0.999991	8.70842e-05	0.000577118	0.6556	7.46344e-06	0.999965	0.0982526	0.00330387	0.0113133	0.0130693	0.0401237	40	14	14	14	21	8	7	8	8	15	19	2.12625	1.88873
SGMS2	sphingomyelin synthase 2	coding	blue	-0.0308472	0.157214	0.746336	-0.660405	0.4314	0.0137828	0.860309	0.802024	0.872436	0.778509	0.393078	0.850129	0.591438	0.00217022	0.0101489	0.0508635	0.974161	0.0129741	0.0166326	0.00470569	0.000628402	0.0959385	0.999991	0.64751	0.00446146	0.0644887	0.0709195	0.999965	0.0982526	0.0783087	0.0331865	0.0130693	0.202359	40	14	14	14	21	8	7	8	8	15	19	0.741194	0.902569
TBKBP1	TBK1 binding protein 1	coding	red	0.0173056	-0.10838	-0.478996	0.579849	-0.279116	0.0666437	0.796714	0.818441	0.747033	0.778359	0.579153	0.915593	0.712276	0.0831143	0.0297407	0.220469	0.875413	0.0319677	0.0129987	0.03318	0.00063092	0.00936502	0.999991	0.75776	0.11553	0.117522	0.267598	0.999965	0.131543	0.0677252	0.110644	0.0131001	0.0398113	40	14	14	14	21	8	7	8	8	15	19	0.0475243	0.242974
ASCC1	activating signal cointegrator 1 complex subunit 1	coding	red	-0.0100516	-0.72045	-0.645024	-0.23181	-0.679451	-0.0670677	0.898091	0.920081	0.845658	0.778252	0.585998	0.950915	0.00365476	0.0127447	0.425195	0.000704917	0.874625	0.00602363	0.00120087	0.00816049	0.000632732	0.00837444	0.999991	0.00690282	0.0215883	0.600468	0.00145458	0.999965	0.0982526	0.018684	0.0444496	0.0131162	0.0370391	40	14	14	14	21	8	7	8	8	15	19	-0.0844319	-0.0888603
EPAS1	endothelial PAS domain protein 1	coding	blue	0.00890222	0.812807	0.749784	0.0858011	0.759224	-0.461231	0.864918	0.895332	0.86414	0.778063	0.643043	0.956522	0.000409572	0.00201559	0.770559	6.57971e-05	0.250014	0.0119611	0.00264636	0.00564775	0.000635932	0.00297938	0.999991	0.00104039	0.00418097	0.862281	0.000175899	0.999965	0.0982526	0.0274739	0.0366988	0.013161	0.0182499	40	14	14	14	21	8	7	8	8	15	19	2.62201	2.54984
CIZ1	CDKN1A interacting zinc finger protein 1	coding	lightcyan	-0.024195	-0.785481	-0.756786	-0.108278	-0.76978	-0.15772	0.871995	0.972086	0.782319	0.777649	0.782964	0.882192	0.000870577	0.00172841	0.712535	4.49557e-05	0.709143	0.0104971	5.32412e-05	0.0217602	0.000642985	7.38466e-05	0.999991	0.00197922	0.00366399	0.825848	0.000126946	0.999965	0.0982526	0.00464352	0.0832143	0.0132696	0.00139999	40	14	14	14	21	8	7	8	8	15	19	0.912682	0.669165
GMPS	guanine monophosphate synthase	coding	pink	-0.0112743	-0.850331	-0.781757	-0.612781	-0.748971	0.0832235	0.847444	0.794149	0.815854	0.777553	0.545987	0.944953	0.000116616	0.000956919	0.0198106	9.35817e-05	0.844675	0.0160538	0.0185791	0.0135343	0.000644627	0.0155919	0.999991	0.000359222	0.00221766	0.0931947	0.000239397	0.999965	0.0985439	0.0836487	0.0606886	0.0132696	0.0565207	40	14	14	14	21	8	7	8	8	15	19	0.319983	0.633348
UNKL	unk like zinc finger	coding	yellow	-0.0130505	-0.902294	-0.861191	-0.391801	-0.842175	0.225058	-0.85264	-0.799826	-0.835258	-0.777515	-0.634081	0.936297	1.01462e-05	7.60649e-05	0.165914	1.68515e-06	0.592049	0.0147649	0.0171624	0.00984216	0.000645279	0.0035511	0.999991	4.87921e-05	0.00026201	0.335306	8.84107e-06	0.999965	0.0982526	0.0798858	0.0494919	0.0132696	0.0205885	40	14	14	14	21	8	7	8	8	15	19	-0.00364628	-0.230433
ATP2A3	ATPase sarcoplasmic/endoplasmic reticulum Ca2+ transporting 3	coding	blue	0.00438965	0.85021	0.975521	-0.72038	0.871892	-0.0501551	0.891199	0.887467	0.911416	0.777502	0.605676	0.978554	0.00011715	2.94674e-09	0.00365959	2.62254e-07	0.906117	0.00706708	0.00326878	0.00162443	0.00064551	0.00599022	0.999991	0.000360677	1.29932e-07	0.0370867	2.69695e-06	0.999965	0.0982526	0.0307934	0.0200399	0.0132696	0.0292118	40	14	14	14	21	8	7	8	8	15	19	1.19515	0.820602
ARHGEF3	Rho guanine nucleotide exchange factor 3	coding	blue	-0.00180834	0.594973	0.918269	-0.853478	0.671798	0.381218	0.858145	0.975528	0.855184	0.777316	0.509679	0.991164	0.0248043	3.60182e-06	0.000103393	0.000852576	0.351448	0.013466	3.59702e-05	0.00679183	0.000648697	0.0258028	0.999991	0.0385936	2.28525e-05	0.0113712	0.00172881	0.999965	0.0982526	0.00410762	0.0402261	0.0132696	0.0795795	40	14	14	14	21	8	7	8	8	15	19	0.767597	1.11442
MYH10	myosin heavy chain 10	coding	orange	0.0228714	-0.00978637	-0.446265	0.423124	-0.225859	-0.389259	-0.926845	-0.794533	-0.918098	-0.777247	-0.576987	0.888595	0.973512	0.109708	0.131696	0.324901	0.340514	0.00267199	0.018481	0.0012905	0.000649892	0.00969739	0.999991	0.977843	0.147989	0.289788	0.378966	0.999965	0.0982526	0.0835123	0.0177477	0.0132696	0.0407872	40	14	14	14	21	8	7	8	8	15	19	1.12798	1.29512
TP53I13	tumor protein p53 inducible protein 13	coding	orange	-0.0700921	0.282681	-0.0351024	0.627742	0.154131	-0.143952	-0.865465	-0.799389	-0.790892	-0.777087	-0.479556	0.667361	0.327456	0.905171	0.0162373	0.504726	0.733796	0.0118442	0.017269	0.0194238	0.000652654	0.0377385	0.999991	0.385538	0.922907	0.0834635	0.55921	0.999965	0.0982526	0.0802044	0.0768744	0.0132696	0.10356	40	14	14	14	21	8	7	8	8	15	19	0.256612	0.0192784
SS18L2	SS18 like 2	coding	yellow	-0.0404048	-0.710541	-0.700387	0.0551752	-0.668817	-0.0657543	-0.859392	-0.825406	-0.839922	-0.776956	-0.617261	0.80449	0.00439805	0.00527763	0.851394	0.000916785	0.877066	0.0131813	0.0116239	0.00906323	0.000654943	0.00486839	0.999991	0.00814371	0.00982997	0.912672	0.00184627	0.999965	0.0982526	0.0639064	0.0472986	0.0132696	0.0252359	40	14	14	14	21	8	7	8	8	15	19	-1.17807	-0.614378
OSBPL8	oxysterol binding protein like 8	coding	blue	0.00290397	0.280866	0.514735	-0.503503	0.395492	0.303222	0.883518	0.871991	0.83719	0.77693	0.624424	0.985811	0.330704	0.0596463	0.066431	0.0759698	0.465346	0.0083455	0.00475337	0.00951453	0.000655392	0.00426547	0.999991	0.388892	0.0861581	0.189391	0.102033	0.999965	0.0982526	0.0374962	0.0485517	0.0132696	0.0230173	40	14	14	14	21	8	7	8	8	15	19	0.419021	0.814732
MARCKS	myristoylated alanine rich protein kinase C substrate	coding	yellow	-0.0219993	-0.912721	-0.948173	0.536583	-0.84755	-0.506581	-0.932768	-0.901301	-0.764169	-0.776925	-0.417828	0.892817	5.27587e-06	2.50083e-07	0.0479007	1.23956e-06	0.200152	0.00217058	0.00222925	0.0272641	0.00065548	0.0750609	0.999991	2.92859e-05	2.96155e-06	0.155488	7.11792e-06	0.999965	0.0982526	0.0252814	0.0967054	0.0132696	0.169985	40	14	14	14	21	8	7	8	8	15	19	1.28671	1.44349
AC127502.2			yellow	-0.000942242	-0.142316	-0.797802	0.633531	-0.416518	-0.122252	-0.893949	-0.841839	-0.785113	-0.776878	-0.62516	0.995396	0.62744	0.000628274	0.0149949	0.0603482	0.773051	0.00663906	0.00875478	0.0209806	0.000656293	0.0042072	0.999991	0.680619	0.00154353	0.0799826	0.0827751	0.999965	0.0982526	0.053766	0.0811312	0.0132696	0.0228326	40	14	14	14	21	8	7	8	8	15	19	-2.11274	-1.82128
SLC38A9	solute carrier family 38 member 9	coding	blue	-0.0057986	0.79188	0.683074	0.104227	0.687191	-0.0297102	0.788871	0.903839	0.978291	0.77678	0.866165	0.971672	0.000736858	0.00708835	0.722896	0.000578319	0.944326	0.0349824	0.00206577	2.51647e-05	0.000658005	1.63805e-06	0.999991	0.00171848	0.0127554	0.832364	0.00121637	0.999965	0.139084	0.0244076	0.00402794	0.0132696	0.00010305	40	14	14	14	21	8	7	8	8	15	19	-0.22795	-0.0973567
RALA	RAS like proto-oncogene A	coding	yellow	-0.0189971	-0.952376	-0.971475	0.238347	-0.880559	0.196125	-0.862325	-0.958334	-0.985191	-0.776746	-0.662756	0.907376	1.51946e-07	7.31404e-09	0.411878	1.39623e-07	0.641588	0.0125252	0.00017523	8.03002e-06	0.000658588	0.00198534	0.999991	1.97874e-06	2.36537e-07	0.589112	1.92954e-06	0.999965	0.0982526	0.0075883	0.00266847	0.0132696	0.013756	40	14	14	14	21	8	7	8	8	15	19	-0.344641	0.0332954
ATAD3A	ATPase family AAA domain containing 3A	coding	brown	-0.064216	-0.957896	-0.951902	-0.307375	-0.890965	-0.638989	-0.870435	-0.953571	-0.868983	-0.776628	-0.523242	0.693828	7.34422e-08	1.61083e-07	0.28506	6.12547e-08	0.0880769	0.0108104	0.000241585	0.00508438	0.000660662	0.0215086	0.999991	1.18152e-06	2.12619e-06	0.466372	1.47306e-06	0.999965	0.0982526	0.00885094	0.0346214	0.0132696	0.070366	40	14	14	14	21	8	7	8	8	15	19	-0.217344	-0.428609
BLOC1S4	biogenesis of lysosomal organelles complex 1 subunit 4	coding	yellow	-0.0236983	-0.842445	-0.872732	0.307514	-0.815724	-0.233949	-0.904554	-0.897849	-0.935932	-0.776547	-0.547061	0.884593	0.000155865	4.63793e-05	0.284832	6.58194e-06	0.577088	0.00513179	0.0024648	0.000626253	0.000662068	0.0153485	0.999991	0.000460065	0.000173871	0.466059	2.48815e-05	0.999965	0.0982526	0.0263499	0.0126402	0.0132696	0.0559635	40	14	14	14	21	8	7	8	8	15	19	-0.983257	-1.13989
TLE1	TLE family member 1, transcriptional corepressor	coding	blue	0.0202385	0.91396	0.917177	0.185704	0.877876	-0.190735	0.758569	0.870157	0.813307	0.77653	0.672418	0.901352	4.8556e-06	3.89074e-06	0.52502	1.70571e-07	0.65095	0.0480642	0.00495351	0.0140749	0.000662367	0.00160994	0.999991	2.75085e-05	2.43195e-05	0.685012	2.1487e-06	0.999965	0.170149	0.0383666	0.0621646	0.0132696	0.0118842	40	14	14	14	21	8	7	8	8	15	19	0.920186	1.17557
GAS2L3	growth arrest specific 2 like 3	coding	yellow	-0.04895	-0.966601	-0.969727	0.0601506	-0.475796	0.25247	-0.696371	-0.804873	-0.88675	-0.776355	-0.754924	0.764215	1.86472e-08	1.04107e-08	0.838148	0.0292474	0.546351	0.0821775	0.0159614	0.00332978	0.000665441	0.000186961	0.999991	4.39913e-07	3.0263e-07	0.905303	0.0427998	0.999965	0.239746	0.0765096	0.0275385	0.0132696	0.00256515	40	14	14	14	21	8	7	8	8	15	19	-1.39032	-1.50446
SLC39A13	solute carrier family 39 member 13	coding	brown	-0.0250299	-0.711664	-0.650353	-0.355758	-0.677098	-0.292534	-0.895592	-0.989032	-0.822095	-0.776355	-0.519365	0.878156	0.00430831	0.0117936	0.211899	0.000747803	0.481988	0.00639083	3.27107e-06	0.0122653	0.000665454	0.0226738	0.999991	0.00800685	0.02015	0.390193	0.00153556	0.999965	0.0982526	0.00330387	0.0567906	0.0132696	0.0727506	40	14	14	14	21	8	7	8	8	15	19	1.07857	0.790682
VPS52	VPS52 subunit of GARP complex	coding	lightcyan	-0.0304958	-0.30479	-0.436529	0.1491	-0.349148	-0.108063	0.877129	0.903062	0.842127	0.776337	0.618457	0.851818	0.28934	0.118627	0.610945	0.120827	0.798954	0.00950326	0.00211493	0.00870902	0.000665754	0.00476315	0.999991	0.346304	0.158717	0.753109	0.155191	0.999965	0.0982526	0.0247096	0.0461654	0.0132696	0.0249159	40	14	14	14	21	8	7	8	8	15	19	0.476404	0.461469
GPAT3	glycerol-3-phosphate acyltransferase 3	coding	red	0.0181302	-0.223886	0.0157942	-0.247591	-0.067974	0.0499435	0.923743	0.915847	0.875698	0.776228	0.510026	0.911586	0.441626	0.957262	0.393419	0.769705	0.906512	0.00295919	0.00139742	0.00436499	0.000667692	0.0256851	0.999991	0.502914	0.96497	0.571448	0.804906	0.999965	0.0982526	0.0201257	0.031758	0.0132696	0.0794104	40	14	14	14	21	8	7	8	8	15	19	-0.919052	-0.506239
PHF10	PHD finger protein 10	coding	tan	0.0303466	0.666883	0.699509	-0.0572873	0.704663	0.0495845	-0.922282	-0.872015	-0.774916	-0.77619	-0.516345	0.852534	0.00918656	0.0053597	0.845766	0.000361741	0.907181	0.00310049	0.00475082	0.0239126	0.000668356	0.0236154	0.999991	0.0157511	0.00997254	0.909415	0.00079871	0.999965	0.0982526	0.0374962	0.0883985	0.0132696	0.0747852	40	14	14	14	21	8	7	8	8	15	19	0.351734	0.575418
TSPAN13	tetraspanin 13	coding	yellow	-0.000112232	-0.727931	-0.970011	0.213808	-0.748335	-0.116065	-0.872494	-0.915221	-0.907552	-0.776143	-0.794727	0.999452	0.00316201	9.84381e-09	0.462971	9.55961e-05	0.784325	0.010398	0.00142817	0.00184089	0.000669188	4.80168e-05	0.999991	0.00607746	2.91511e-07	0.633853	0.000243811	0.999965	0.0982526	0.0202913	0.021146	0.0132696	0.00103064	40	14	14	14	21	8	7	8	8	15	19	-1.52927	-2.18585
TMOD3	tropomodulin 3	coding	blue	0.0289429	0.560177	0.822637	-0.270606	0.652344	0.268769	0.828451	0.827326	0.850448	0.775974	0.711238	0.859286	0.0372125	0.000303121	0.349408	0.00135074	0.519802	0.0212961	0.011262	0.0074523	0.000672186	0.00063951	0.999991	0.0557262	0.000829825	0.530786	0.00262447	0.999965	0.106522	0.0626518	0.0424479	0.0132696	0.00619188	40	14	14	14	21	8	7	8	8	15	19	1.18898	1.40978
CBFB	core-binding factor subunit beta	coding	turquoise	-0.0218827	-0.917595	-0.848779	-0.487303	-0.84048	0.279475	-0.861342	-0.888773	-0.881612	-0.775963	-0.812386	0.893382	3.77785e-06	0.000123623	0.0771613	1.85214e-06	0.502631	0.012743	0.00315954	0.00378866	0.000672374	2.38406e-05	0.999991	2.26295e-05	0.000391685	0.207079	9.48874e-06	0.999965	0.0982526	0.030359	0.0295543	0.0132696	0.000641864	40	14	14	14	21	8	7	8	8	15	19	0.0333059	0.304106
STARD3NL	STARD3 N-terminal like	coding	yellow	-0.133329	-0.935561	-0.935197	-0.133819	-0.845512	-0.0898539	-0.851196	-0.92559	-0.823974	-0.775911	-0.764523	0.412114	8.98752e-07	9.28955e-07	0.64833	1.3945e-06	0.832428	0.0151168	0.000973361	0.0118987	0.000673304	0.000137963	0.999991	7.22116e-06	7.92358e-06	0.781147	7.73445e-06	0.999965	0.0983513	0.0169534	0.0556695	0.0132696	0.00209933	40	14	14	14	21	8	7	8	8	15	19	0.16917	0.19682
EDEM1	ER degradation enhancing alpha-mannosidase like protein 1	coding	yellow	-0.00550157	-0.906493	-0.944926	0.415273	-0.886721	-0.446907	-0.737148	-0.882502	-0.905229	-0.775862	-0.801856	0.973123	7.86879e-06	3.57584e-07	0.139783	8.65462e-08	0.266938	0.0587042	0.00370642	0.00197961	0.000674173	3.64963e-05	0.999991	3.98163e-05	3.84596e-06	0.300962	1.61694e-06	0.999965	0.193346	0.0326831	0.0216608	0.0132696	0.000851794	40	14	14	14	21	8	7	8	8	15	19	0.438711	0.242974
RNF152	ring finger protein 152	coding	orange	-0.00152872	0.0792805	-0.195728	0.578525	-0.0405055	0.0105743	-0.783276	-0.844208	-0.909324	-0.775836	-0.834174	0.99253	0.787616	0.502475	0.0302052	0.861611	0.980175	0.0372255	0.00838305	0.00173944	0.000674627	9.03309e-06	0.999991	0.822548	0.563081	0.118617	0.883725	0.999965	0.144215	0.052469	0.0208057	0.0132696	0.000333013	40	14	14	14	21	8	7	8	8	15	19	0.692933	0.387765
ST6GALNAC3	ST6 N-acetylgalactosaminide alpha-2,6-sialyltransferase 3	coding	darkgreen	-0.00175861	-0.520058	-0.144478	-0.353109	-0.361024	-0.0184391	0.918199	0.96861	0.973364	0.775818	0.799016	0.991407	0.0566121	0.622165	0.215564	0.10786	0.965435	0.00351601	7.55174e-05	4.63058e-05	0.000674953	4.07634e-05	0.999991	0.0811817	0.675477	0.394302	0.140203	0.999965	0.0982526	0.00492225	0.00472207	0.0132696	0.00092541	40	14	14	14	21	8	7	8	8	15	19	0.0475243	0.533556
RAI1	retinoic acid induced 1	coding	yellow	0.00317851	-0.152193	-0.449005	0.43928	-0.304958	-0.492142	-0.763101	-0.904627	-0.904427	-0.775803	-0.718533	0.98447	0.603479	0.107283	0.116059	0.178882	0.215406	0.0459619	0.00201664	0.00202901	0.000675215	0.000528956	0.999991	0.658389	0.145059	0.267559	0.221177	0.999965	0.165166	0.0241395	0.021897	0.0132696	0.00540715	40	14	14	14	21	8	7	8	8	15	19	0.705981	0.620038
AC096921.2			yellow	-0.00454632	-0.759262	-0.907962	0.640713	-0.764752	-0.306869	-0.900222	-0.820216	-0.813777	-0.775746	-0.500864	0.977788	0.00163503	7.17904e-06	0.0135562	5.40278e-05	0.459722	0.0057203	0.0126392	0.0139741	0.000676242	0.0289358	0.999991	0.00342018	3.91626e-05	0.0752824	0.000148035	0.999965	0.0982526	0.0668132	0.0619342	0.0132696	0.0863363	40	14	14	14	21	8	7	8	8	15	19	-1.45613	-1.59321
COPS8	COP9 signalosome subunit 8	coding	pink	0.00676935	-0.882492	-0.710952	-0.709115	-0.717257	0.147902	0.732078	0.850231	0.86625	0.775711	0.639826	0.966932	2.93736e-05	0.00436509	0.00451412	0.00025263	0.726701	0.0613923	0.00748345	0.00539769	0.000676852	0.00317514	0.999991	0.000114427	0.00828155	0.0411279	0.000580186	0.999965	0.198534	0.049132	0.0356977	0.0132696	0.0190512	40	14	14	14	21	8	7	8	8	15	19	0.490897	0.641199
ZC3H8	zinc finger CCCH-type containing 8	coding	blue	0.000898819	0.317299	0.657999	-0.385504	0.454087	0.403409	0.818857	0.783243	0.853969	0.775703	0.615324	0.995608	0.268981	0.0105254	0.17343	0.0386599	0.321664	0.0242667	0.0215005	0.00695758	0.000676997	0.00504288	0.999991	0.324486	0.0182046	0.344924	0.0552577	0.999965	0.113063	0.0906097	0.0409203	0.0132696	0.0258481	40	14	14	14	21	8	7	8	8	15	19	-0.486604	-0.911822
PDK1	pyruvate dehydrogenase kinase 1	coding	yellow	0.00428041	0.112352	-0.0614761	0.368437	0.0449613	0.179296	-0.86769	-0.941012	-0.953772	-0.775703	-0.912283	0.979087	0.702161	0.834626	0.194901	0.846552	0.670955	0.0113746	0.000490691	0.000238491	0.000677009	5.31e-08	0.999991	0.749015	0.863159	0.371443	0.871076	0.999965	0.0982526	0.0121662	0.00828495	0.0132696	7.8994e-06	40	14	14	14	21	8	7	8	8	15	19	-0.307409	0.238012
ERCC4	ERCC excision repair 4, endonuclease catalytic subunit	coding	blue	0.0404923	-0.120568	-0.0409815	-0.063656	-0.0626655	0.234861	0.906761	0.970767	0.961409	0.775654	0.806345	0.804075	0.681389	0.889372	0.828839	0.787276	0.575561	0.00484616	6.10958e-05	0.000139558	0.000677885	3.05319e-05	0.999991	0.729689	0.909732	0.90058	0.82131	0.999965	0.0982526	0.00470968	0.00700281	0.0132696	0.000753752	40	14	14	14	21	8	7	8	8	15	19	-0.147536	-0.0172161
LOX	lysyl oxidase	coding	brown	0.0146831	-0.422325	0.0883954	-0.498772	-0.132438	-0.187989	-0.927364	-0.913448	-0.774587	-0.775557	-0.557462	0.928347	0.132504	0.763798	0.0694473	0.567134	0.655737	0.00262553	0.00151756	0.0240111	0.000679615	0.0131458	0.999991	0.173665	0.802378	0.194483	0.618743	0.999965	0.0982526	0.0209793	0.0886483	0.0132696	0.050031	40	14	14	14	21	8	7	8	8	15	19	0.394588	0.919401
SYNPO	synaptopodin	coding	blue	0.0187121	0.880977	0.924217	-0.714982	0.851331	-0.190899	0.904345	0.888793	0.898204	0.775505	0.562343	0.90876	3.16117e-05	2.31921e-06	0.00405156	9.91744e-07	0.650666	0.00515933	0.00315785	0.00243988	0.000680538	0.0122034	0.999991	0.000121758	1.61134e-05	0.038744	6.11438e-06	0.999965	0.0982526	0.030359	0.023618	0.0132696	0.0475246	40	14	14	14	21	8	7	8	8	15	19	2.63561	2.29929
KLHL8	kelch like family member 8	coding	darkgreen	0.00576967	-0.630527	-0.190143	-0.577385	-0.391216	0.699679	0.830571	0.79739	0.913199	0.775477	0.715999	0.971814	0.0156303	0.514982	0.0306096	0.0794867	0.0533805	0.020669	0.0177616	0.00153038	0.000681041	0.000565366	0.999991	0.0254598	0.574854	0.119352	0.106282	0.999965	0.105426	0.0815523	0.0193697	0.0132696	0.00564181	40	14	14	14	21	8	7	8	8	15	19	-0.426094	-0.105971
UNC119B	unc-119 lipid binding chaperone B	coding	red	-0.15273	-0.74175	-0.759661	0.309132	-0.73322	-0.0195156	0.881064	0.829973	0.896712	0.775476	0.649573	0.346779	0.00239036	0.00162036	0.282174	0.000155887	0.963418	0.00877987	0.0107747	0.00254583	0.000681058	0.00261262	0.999991	0.00474805	0.00347161	0.463569	0.000376614	0.999965	0.0982526	0.0609602	0.0240778	0.0132696	0.0167028	40	14	14	14	21	8	7	8	8	15	19	0.157375	-0.676452
ALDH2	aldehyde dehydrogenase 2 family member	coding	blue	0.0128772	0.96579	0.937632	0.239566	0.905438	-0.0363112	0.888928	0.945184	0.8643	0.775349	0.640865	0.937142	2.14968e-08	7.42172e-07	0.409419	1.6781e-08	0.931976	0.00743226	0.000395039	0.00562855	0.000683348	0.00311075	0.999991	4.89779e-07	6.6748e-06	0.587039	1.19401e-06	0.999965	0.0982526	0.0110048	0.0366305	0.0132937	0.018758	40	14	14	14	21	8	7	8	8	15	19	1.13475	1.20139
RASSF7	Ras association domain family member 7	coding	yellow	-0.0433845	-0.543114	-0.635277	0.317494	-0.599152	0.0676317	-0.937039	-0.910934	-0.74626	-0.775282	-0.530217	0.790384	0.0447426	0.014635	0.268671	0.0041019	0.873577	0.00184637	0.00165044	0.0334638	0.000684549	0.0195318	0.999991	0.0657872	0.0243756	0.449503	0.00719297	0.999965	0.0982526	0.0219255	0.111269	0.0132967	0.0657735	40	14	14	14	21	8	7	8	8	15	19	-1.09311	-0.372821
HHEX	hematopoietically expressed homeobox	coding	yellow	-0.0560762	-0.319041	-0.271705	-0.221086	-0.28058	-0.788207	-0.843629	-0.822253	-0.843305	-0.775123	-0.440488	0.731086	0.266216	0.347378	0.447507	0.217956	0.0201377	0.0170397	0.0122343	0.0085235	0.000687412	0.0590895	0.999991	0.321487	0.408765	0.621975	0.264725	0.949988	0.0998883	0.0656277	0.0457008	0.0133318	0.14292	40	14	14	14	21	8	7	8	8	15	19	0.637989	0.841661
PTGIR	prostaglandin I2 receptor	coding	orange	-0.0103407	0.165336	-0.332568	0.683206	-0.109175	0.14778	-0.832137	-0.925443	-0.883883	-0.774884	-0.824689	0.949505	0.572167	0.245321	0.0070729	0.637584	0.726921	0.0202126	0.000979035	0.00358115	0.000691744	1.40062e-05	0.999991	0.629792	0.301729	0.0529839	0.685857	0.999965	0.104711	0.0169588	0.0286047	0.0133721	0.000439475	40	14	14	14	21	8	7	8	8	15	19	-1.01787	-2.18585
COBLL1	cordon-bleu WH2 repeat protein like 1	coding	blue	0.00136265	0.0521773	0.669411	-0.763567	0.331604	-0.214574	0.910467	0.860075	0.97374	0.774843	0.853183	0.993342	0.859393	0.00883087	0.00148223	0.141975	0.609852	0.00438787	0.00615038	4.43828e-05	0.0006925	3.43564e-06	0.999991	0.884145	0.0155418	0.0237706	0.179554	0.999965	0.0982526	0.043741	0.0046586	0.0133721	0.000175885	40	14	14	14	21	8	7	8	8	15	19	0.838876	0.997324
RYBP	RING1 and YY1 binding protein	coding	blue	0.026468	0.746109	0.824249	-0.559241	0.757894	0.782455	0.905616	0.889025	0.950102	0.774787	0.842624	0.871212	0.00218072	0.000288029	0.0375996	6.89397e-05	0.0217221	0.00499327	0.00313871	0.00029909	0.00069351	5.96972e-06	0.999991	0.00438154	0.000795744	0.13344	0.000182947	0.972243	0.0982526	0.0302738	0.00936137	0.0133721	0.000252331	40	14	14	14	21	8	7	8	8	15	19	0.286621	0.822546
DDI2	DNA damage inducible 1 homolog 2	coding	yellow	-0.0345731	-0.533169	-0.627121	0.458859	-0.567917	0.237302	-0.865025	-0.91337	-0.911728	-0.774776	-0.52505	0.832272	0.0496143	0.016375	0.0988677	0.0072393	0.57148	0.0119382	0.00152159	0.00160771	0.000693722	0.0209816	0.999991	0.0721865	0.0269893	0.242154	0.0120512	0.999965	0.0982526	0.0209793	0.0199309	0.0133721	0.0692359	40	14	14	14	21	8	7	8	8	15	19	0.276769	0.212589
RHOA	ras homolog family member A	coding	red	-0.00043809	-0.589302	0.147539	-0.723684	-0.203885	0.022399	0.907046	0.844027	0.87713	0.77459	0.53697	0.997859	0.0265771	0.614724	0.00343481	0.375364	0.958016	0.00481005	0.0084111	0.00422055	0.000697108	0.0177582	0.999991	0.0410887	0.669237	0.035836	0.430675	0.999965	0.0982526	0.0525746	0.0311916	0.0134169	0.0616903	40	14	14	14	21	8	7	8	8	15	19	1.9676	1.91529
AK9	adenylate kinase 9	coding	blue	0.0278864	0.94292	0.933787	0.0759667	0.671053	0.120999	0.848787	0.825715	0.849088	0.774356	0.738899	0.864373	4.41231e-07	1.05368e-06	0.79632	0.000868245	0.775332	0.0157148	0.0115652	0.00764918	0.000701387	0.000301666	0.999991	4.29017e-06	8.6488e-06	0.878689	0.00175692	0.999965	0.0984887	0.063694	0.0427786	0.0134788	0.00359152	40	14	14	14	21	8	7	8	8	15	19	-0.519083	-0.230433
TPK1	thiamin pyrophosphokinase 1	coding	darkgreen	0.00610169	-0.544189	0.0132999	-0.690323	-0.265764	0.553506	0.869364	0.75961	0.87034	0.774261	0.468352	0.970192	0.0442381	0.964007	0.00627942	0.244262	0.154665	0.0110286	0.0287686	0.00493333	0.000703137	0.0431282	0.999991	0.065106	0.970356	0.0494109	0.293268	0.999965	0.0982526	0.109608	0.0340833	0.0134919	0.113734	40	14	14	14	21	8	7	8	8	15	19	-0.833159	-0.386305
FRMD5	FERM domain containing 5	coding	yellow	-0.0725134	-0.852764	-0.884608	0.694643	-0.851286	0.311907	-0.814073	-0.803174	-0.89632	-0.774091	-0.778118	0.656566	0.000106281	2.64639e-05	0.00583282	9.94378e-07	0.451998	0.0258299	0.0163595	0.00257412	0.000706271	8.75189e-05	0.999991	0.000333151	0.000111316	0.0473956	6.1197e-06	0.999965	0.1164	0.0775942	0.0242366	0.0135074	0.00154997	40	14	14	14	21	8	7	8	8	15	19	-0.470946	-1.50446
MFHAS1	multifunctional ROCO family signaling regulator 1	coding	yellow	-0.0232135	-0.853775	-0.871136	0.150769	-0.768721	0.20986	-0.838076	-0.806329	-0.825147	-0.774078	-0.518096	0.886939	0.00010221	4.97993e-05	0.60691	4.67472e-05	0.617912	0.0185343	0.0156249	0.0116734	0.000706509	0.0230656	0.999991	0.000322307	0.000184126	0.750306	0.000131039	0.999965	0.102004	0.0756131	0.0550328	0.0135074	0.0736698	40	14	14	14	21	8	7	8	8	15	19	0.310623	-0.0722089
ADD1	adducin 1	coding	blue	0.0214429	0.890101	0.882615	-0.355694	0.856048	-0.621055	0.848539	0.966564	0.987865	0.773989	0.908018	0.895513	1.9995e-05	2.91967e-05	0.211987	7.44305e-07	0.100307	0.0157771	9.11201e-05	4.42665e-06	0.000708156	7.83286e-08	0.999991	8.41947e-05	0.000120141	0.390298	5.06655e-06	0.999965	0.0984887	0.00521363	0.00257874	0.0135074	1.06502e-05	40	14	14	14	21	8	7	8	8	15	19	2.1316	1.76939
PLAGL2	PLAG1 like zinc finger 2	coding	pink	-0.0425835	-0.888208	-0.818143	-0.763539	-0.807067	0.905741	0.823161	0.873585	0.960946	0.773986	0.756514	0.79417	2.20588e-05	0.000348603	0.0014832	9.81888e-06	0.00194843	0.0229069	0.00458375	0.000144592	0.000708215	0.000177947	0.999991	9.11252e-05	0.000935721	0.0237706	3.44793e-05	0.434403	0.110165	0.0368143	0.00708667	0.0135074	0.00248086	40	14	14	14	21	8	7	8	8	15	19	-0.12888	-0.386305
ACSS1	acyl-CoA synthetase short chain family member 1	coding	yellow	-0.00801013	-0.796049	-0.86327	0.445838	-0.79551	-0.00836159	-0.837491	-0.954018	-0.861399	-0.7739	-0.560155	0.960876	0.000658983	6.98081e-05	0.110089	1.62571e-05	0.984323	0.0186962	0.000234745	0.0059837	0.000709815	0.012619	0.999991	0.00156221	0.000244454	0.259088	5.2724e-05	0.999965	0.102027	0.00867939	0.0377212	0.0135175	0.0487024	40	14	14	14	21	8	7	8	8	15	19	-1.70568	-1.97716
NF2	neurofibromin 2	coding	brown	-0.025573	-0.965534	-0.937014	-0.0887505	-0.335834	0.166329	-0.77689	-0.784294	-0.866888	-0.773737	-0.643431	0.875533	2.24688e-08	7.86293e-07	0.762874	0.136653	0.693838	0.0398809	0.0212072	0.00532352	0.000712842	0.00295643	0.999991	5.06449e-07	6.99696e-06	0.857545	0.173648	0.999965	0.150761	0.090127	0.0354793	0.0135547	0.0181564	40	14	14	14	21	8	7	8	8	15	19	1.06524	0.539712
PPP6R2	protein phosphatase 6 regulatory subunit 2	coding	yellow	-0.0212109	-0.538844	-0.710978	0.415482	-0.602787	-0.0396276	-0.806681	-0.819957	-0.85442	-0.773659	-0.697868	0.896638	0.0467895	0.00436295	0.139564	0.00382521	0.925776	0.028354	0.0126912	0.00689569	0.000714293	0.000892857	0.999991	0.0684705	0.00827875	0.300697	0.00675318	0.999965	0.122159	0.0668949	0.0406508	0.0135619	0.00779708	40	14	14	14	21	8	7	8	8	15	19	0.881777	0.563743
SLC2A10	solute carrier family 2 member 10	coding	black	0.0169423	0.908848	0.815751	0.219583	0.833209	-0.606619	-0.855122	-0.872336	-0.906121	-0.77342	-0.518848	0.917358	6.78744e-06	0.00037496	0.450679	2.74498e-06	0.110819	0.0141707	0.00471632	0.00192556	0.000718759	0.0228329	0.999991	3.54073e-05	0.000996879	0.624504	1.27004e-05	0.999965	0.0982526	0.0373671	0.0214578	0.0135651	0.0731187	40	14	14	14	21	8	7	8	8	15	19	0.369213	0.403223
SEMA6A	semaphorin 6A	coding	blue	0.0123765	0.900411	0.938446	-0.357523	0.84198	0.428304	0.871381	0.90044	0.719092	0.773398	0.571755	0.939581	1.13301e-05	6.87117e-07	0.209478	1.70363e-06	0.289738	0.0106198	0.00228657	0.0443964	0.000719176	0.0105398	0.999991	5.33986e-05	6.31438e-06	0.387485	8.91285e-06	0.999965	0.0982526	0.0256099	0.134492	0.0135651	0.0429923	40	14	14	14	21	8	7	8	8	15	19	-0.101852	0.41081
HDAC3	histone deacetylase 3	coding	yellow	-0.0289778	-0.826741	-0.915452	0.465177	-0.844903	0.0535551	-0.833232	-0.935534	-0.972828	-0.77338	-0.911605	0.859118	0.000265896	4.38624e-06	0.0937194	1.444e-06	0.899776	0.0198971	0.000637821	4.91396e-05	0.000719517	5.65618e-08	0.999991	0.000721513	2.67175e-05	0.234067	7.90451e-06	0.999965	0.104182	0.0138578	0.00477977	0.0135651	8.11289e-06	40	14	14	14	21	8	7	8	8	15	19	0.329212	0.267205
THBS1	thrombospondin 1	coding	brown	-0.0211303	-0.888218	-0.870791	-0.461537	-0.824226	-0.47415	-0.867278	-0.955348	-0.854061	-0.773367	-0.520443	0.897028	2.20473e-05	5.05659e-05	0.0966622	4.35318e-06	0.235229	0.0114607	0.000215185	0.00694491	0.000719755	0.0223448	0.999991	9.11073e-05	0.000186579	0.238607	1.80497e-05	0.999965	0.0982526	0.00834665	0.0408648	0.0135651	0.0720982	40	14	14	14	21	8	7	8	8	15	19	3.43164	2.72238
DLG4	discs large MAGUK scaffold protein 4	coding	blue	0.00263945	0.798848	0.186308	0.457378	0.457149	-0.296497	0.838823	0.935796	0.802665	0.773363	0.837742	0.987104	0.000610518	0.523649	0.100102	0.0372054	0.475791	0.0183292	0.00063021	0.0164801	0.000719827	7.60559e-06	0.999991	0.00146253	0.58319	0.2437	0.0533464	0.999965	0.101711	0.0138111	0.0686397	0.0135651	0.000297748	40	14	14	14	21	8	7	8	8	15	19	0.31532	0.440263
MPZL2	myelin protein zero like 2	coding	blue	0.00713324	0.92056	0.974595	-0.692548	0.808023	0.0020775	0.782057	0.836694	0.889535	0.773237	0.765502	0.965156	3.05234e-06	3.67497e-09	0.0060462	9.40395e-06	0.996105	0.0377245	0.00959798	0.00309684	0.000722193	0.000133647	0.999991	1.91738e-05	1.51083e-07	0.0483794	3.32601e-05	0.999965	0.145391	0.0571405	0.0268216	0.0135895	0.00205593	40	14	14	14	21	8	7	8	8	15	19	1.6224	1.83001
EPC2	enhancer of polycomb homolog 2	coding	blue	0.0198091	0.948102	0.897919	0.254023	0.863089	0.491834	0.831214	0.922426	0.867347	0.773127	0.665925	0.903436	2.52122e-07	1.3068e-05	0.380837	4.75698e-07	0.215738	0.0204811	0.00110019	0.00527052	0.000724265	0.00185496	0.999991	2.87993e-06	6.30207e-05	0.559638	3.86085e-06	0.999965	0.105122	0.0179973	0.0352818	0.0136082	0.0131039	40	14	14	14	21	8	7	8	8	15	19	0.276769	0.505071
PRKCZ	protein kinase C zeta	coding	blue	-0.00966769	0.859839	0.918497	-0.81312	0.721508	-0.215203	0.701358	0.771187	0.806464	0.772939	0.570358	0.952788	8.03739e-05	3.54366e-06	0.000405778	0.000222852	0.608779	0.0790795	0.0250447	0.0155942	0.000727828	0.0107744	0.999991	0.000263913	2.25969e-05	0.0159846	0.000518771	0.999965	0.234596	0.100155	0.0661928	0.0136402	0.0436177	40	14	14	14	21	8	7	8	8	15	19	0.00391215	-0.0401901
CCL14	C-C motif chemokine ligand 14	coding	brown	-0.026687	-0.892937	-0.894206	0.00277459	-0.833161	-0.775526	-0.893475	-0.888379	-0.793768	-0.772923	-0.607411	0.870156	1.72009e-05	1.60583e-05	0.992489	2.75195e-06	0.0237304	0.00671172	0.0031922	0.0186766	0.000728123	0.00580995	0.999991	7.4542e-05	7.41357e-05	0.995876	1.27233e-05	0.992742	0.0982526	0.0305105	0.0748306	0.0136402	0.0286309	40	14	14	14	21	8	7	8	8	15	19	-3.39233	-3.18406
KLF10	Kruppel like factor 10	coding	purple	0.0231375	0.950156	0.957529	-0.523377	0.59163	0.989877	0.733098	0.834188	0.934343	0.772789	-0.0457835	0.887307	1.98747e-07	7.73015e-08	0.0547771	0.00472756	2.57397e-06	0.0608463	0.0100267	0.000673208	0.000730674	0.852355	0.999991	2.41186e-06	1.22338e-06	0.167649	0.00815663	0.0325479	0.197149	0.0585352	0.013101	0.0136677	0.908848	40	14	14	14	21	8	7	8	8	15	19	1.44541	2.10679
SEC16A	SEC16 homolog A, endoplasmic reticulum export factor	coding	yellow	-0.0452202	-0.531224	-0.290008	-0.337018	-0.4112	-0.377536	-0.892365	-0.765702	-0.825816	-0.772678	-0.527807	0.781726	0.0506103	0.314524	0.238674	0.0640452	0.356509	0.00688381	0.0267691	0.011546	0.000732785	0.0201978	0.999991	0.0734413	0.374708	0.418661	0.0873438	0.999965	0.0982526	0.104635	0.0547632	0.0136809	0.0673765	40	14	14	14	21	8	7	8	8	15	19	1.37083	1.15206
DUSP5	dual specificity phosphatase 5	coding	blue	0.045997	0.929211	0.928679	-0.123327	0.900654	0.863269	0.884566	0.901493	0.813016	0.772638	0.32881	0.77807	1.55762e-06	1.62734e-06	0.674459	2.63077e-08	0.00575313	0.00816373	0.0022166	0.0141374	0.000733541	0.169278	0.999991	1.11846e-05	1.22071e-05	0.799076	1.26295e-06	0.632621	0.0982526	0.0251832	0.0623739	0.0136809	0.306664	40	14	14	14	21	8	7	8	8	15	19	1.18774	2.15595
MED13	mediator complex subunit 13	coding	blue	0.0321553	0.849147	0.843156	0.133201	0.836975	0.191772	0.777855	0.913256	0.887255	0.77257	0.846005	0.843851	0.000121934	0.000151939	0.649858	2.24427e-06	0.649147	0.0394732	0.00152743	0.00328673	0.000734828	5.02406e-06	0.999991	0.000372463	0.000466327	0.782049	1.09597e-05	0.999965	0.149705	0.0209939	0.0274804	0.0136847	0.000229347	40	14	14	14	21	8	7	8	8	15	19	1.31392	1.39144
NRP1	neuropilin 1	coding	yellow	-0.0127716	-0.941444	-0.969631	0.741906	-0.893147	0.22774	-0.855135	-0.79944	-0.941461	-0.772424	-0.722118	0.937656	5.12605e-07	1.06072e-08	0.00238255	5.09973e-08	0.587523	0.0141676	0.0172565	0.000479737	0.000737623	0.000480828	0.999991	4.77311e-06	3.05531e-07	0.0293817	1.4058e-06	0.999965	0.0982526	0.080194	0.0114242	0.0137094	0.00504392	40	14	14	14	21	8	7	8	8	15	19	0.836762	0.343154
TAF8	TATA-box binding protein associated factor 8	coding	blue	-0.0017766	0.43173	0.00706823	0.462346	0.210351	-0.410263	0.687335	0.876192	0.939502	0.772387	0.888273	0.991319	0.1232	0.980868	0.0960027	0.360074	0.312715	0.0879517	0.00431476	0.000528755	0.000738326	3.81737e-07	0.999991	0.162905	0.983902	0.237657	0.415167	0.999965	0.250766	0.035344	0.0119395	0.0137094	3.62937e-05	40	14	14	14	21	8	7	8	8	15	19	0.446424	0.464934
TSC2	TSC complex subunit 2	coding	blue	0.00752633	0.570851	0.135344	0.444222	0.314167	-0.67703	0.850027	0.942999	0.844935	0.77221	0.600932	0.963237	0.0330045	0.644562	0.11154	0.165456	0.0651392	0.0154054	0.000443443	0.00827095	0.000741726	0.00650669	0.999991	0.050029	0.696266	0.261095	0.206087	0.999965	0.0984578	0.0118	0.0449293	0.0137524	0.0310129	40	14	14	14	21	8	7	8	8	15	19	1.36136	1.14402
QPCTL	glutaminyl-peptide cyclotransferase like	coding	yellow	-0.0363704	-0.904575	-0.90016	-0.0285157	-0.83938	-0.783079	-0.926933	-0.88604	-0.740755	-0.771755	-0.369627	0.823686	8.85039e-06	1.1496e-05	0.922912	1.96813e-06	0.0215464	0.00266401	0.00339097	0.0355283	0.000750522	0.119341	0.999991	4.37674e-05	5.70766e-05	0.954775	9.92303e-06	0.972243	0.0982526	0.0313671	0.115806	0.0138951	0.23825	40	14	14	14	21	8	7	8	8	15	19	-0.589291	-0.557954
SSR3	signal sequence receptor subunit 3	coding	brown	-0.0139449	-0.968336	-0.919972	-0.529995	-0.914309	-0.0379074	-0.843559	-0.883774	-0.865499	-0.771629	-0.605911	0.931941	1.35892e-08	3.18623e-06	0.0512473	6.81974e-09	0.928992	0.0170581	0.00359093	0.00548584	0.000752971	0.00596556	0.999991	3.55033e-07	2.0694e-05	0.161763	1.19401e-06	0.999965	0.0998883	0.03209	0.0361671	0.0139201	0.0291628	40	14	14	14	21	8	7	8	8	15	19	0.741194	0.968854
UBL3	ubiquitin like 3	coding	blue	0.0584239	0.955639	0.948161	0.0319449	0.610411	-0.77012	0.87655	0.89869	0.975046	0.771549	0.880628	0.720273	9.99675e-08	2.50437e-07	0.913671	0.00329517	0.0253747	0.00961246	0.00240605	3.81233e-05	0.000754533	6.52187e-07	0.999991	1.46987e-06	2.96237e-06	0.9498	0.00590692	0.999965	0.0982526	0.0260821	0.0046586	0.0139286	5.28648e-05	40	14	14	14	21	8	7	8	8	15	19	0.31532	0.767785
GPR3	G protein-coupled receptor 3	coding	yellow	-0.01713	-0.934557	-0.946623	0.0501789	-0.848388	-0.234584	-0.841523	-0.924245	-0.853761	-0.771469	-0.586493	0.916446	9.83956e-07	2.97463e-07	0.864732	1.18035e-06	0.576024	0.0175982	0.00102606	0.00698614	0.000756077	0.0083063	0.999991	7.76662e-06	3.38866e-06	0.919849	6.87813e-06	0.999965	0.101101	0.0173702	0.0410193	0.0139367	0.0368926	40	14	14	14	21	8	7	8	8	15	19	-2.334	-1.97716
AC037198.2			brown	-0.0283628	-0.649026	-0.675801	0.111962	-0.673899	-0.675721	-0.877464	-0.898623	-0.75992	-0.771246	-0.365844	0.862079	0.0120253	0.00797888	0.703153	0.000809632	0.0658612	0.0094404	0.00241069	0.0286645	0.00076045	0.123466	0.999991	0.020119	0.0141883	0.818582	0.00165046	0.999965	0.0982526	0.0260821	0.100529	0.0139969	0.244286	40	14	14	14	21	8	7	8	8	15	19	-1.09311	-3.18406
GNL1	G protein nucleolar 1 (putative)	coding	blue	0.00925397	0.720348	0.614989	0.326472	0.664879	0.285239	0.894501	0.883564	0.972394	0.771135	0.892477	0.954806	0.00366183	0.0192488	0.25461	0.00100791	0.493478	0.006555	0.00360981	5.1513e-05	0.000762638	2.79626e-07	0.999991	0.00691412	0.0311533	0.435662	0.00201343	0.999965	0.0982526	0.0321905	0.0048976	0.0140168	2.9222e-05	40	14	14	14	21	8	7	8	8	15	19	0.871813	1.02314
CLEC2B	C-type lectin domain family 2 member B	coding	salmon	0.00444324	-0.369044	-0.730658	0.690588	-0.542371	-0.20439	-0.888672	-0.856879	-0.781015	-0.770687	-0.472129	0.978292	0.194109	0.00299607	0.00625133	0.0110806	0.627309	0.00747418	0.00656489	0.0221303	0.00077149	0.0412494	0.999991	0.243334	0.00589838	0.0493434	0.0177427	0.999965	0.0982526	0.0455489	0.0840857	0.0141213	0.110088	40	14	14	14	21	8	7	8	8	15	19	-1.81553	-1.59321
USP46	ubiquitin specific peptidase 46	coding	yellow	-0.0119754	-0.730327	-0.763399	0.337374	-0.739182	0.631922	-0.806614	-0.887504	-0.954985	-0.770647	-0.735141	0.941536	0.00301579	0.00148797	0.238146	0.000129042	0.0927868	0.0283775	0.00326563	0.000220405	0.000772276	0.000335847	0.999991	0.00583367	0.00323123	0.418293	0.00031876	0.999965	0.12221	0.0307934	0.00803044	0.0141213	0.00383631	40	14	14	14	21	8	7	8	8	15	19	-0.331994	-0.00974339
TDRD3	tudor domain containing 3	coding	blue	0.0866867	0.82746	0.804045	0.523234	0.700465	0.456335	0.8603	0.922153	0.79082	0.770623	0.540533	0.594814	0.000259773	0.000528118	0.054855	0.000406107	0.255736	0.0129761	0.00111163	0.0194426	0.000772752	0.0168751	0.999991	0.000706719	0.00133241	0.167747	0.000885078	0.999965	0.0982526	0.0180349	0.0768841	0.0141213	0.0595552	40	14	14	14	21	8	7	8	8	15	19	-0.119746	0.545807
DTNA	dystrobrevin alpha	coding	yellow	-0.00829501	0.249846	-0.0738869	0.424113	0.072831	0.569053	-0.83773	-0.963344	-0.848683	-0.770575	-0.670327	0.959485	0.388983	0.801794	0.1307	0.753723	0.140988	0.01863	0.000119773	0.00770851	0.000773699	0.00168572	0.999991	0.449401	0.835766	0.288531	0.791072	0.999965	0.102027	0.00620709	0.042978	0.0141213	0.0122788	40	14	14	14	21	8	7	8	8	15	19	0.114341	-0.372821
ZNF532	zinc finger protein 532	coding	grey60	-0.00157091	0.798293	0.621431	0.297115	0.644622	-0.0120481	-0.80559	-0.821465	-0.902718	-0.770481	-0.764059	0.992324	0.000619884	0.0176789	0.302264	0.00160743	0.977412	0.0287378	0.0123899	0.00213699	0.000775572	0.000140051	0.999991	0.00148231	0.0288563	0.484734	0.00306483	0.999965	0.123094	0.0660248	0.0224153	0.0141213	0.00212089	40	14	14	14	21	8	7	8	8	15	19	0.873818	0.87107
NOB1	NIN1 (RPN12) binding protein 1 homolog	coding	pink	0.00608176	-0.820389	-0.527975	-0.458516	-0.635333	-0.053372	0.709475	0.882083	0.837489	0.770435	0.81268	0.97029	0.000325232	0.0523067	0.0991527	0.00196957	0.900117	0.0741724	0.00374496	0.00946449	0.000776491	2.35497e-05	0.999991	0.000858212	0.076553	0.242432	0.00368857	0.999965	0.224811	0.0328854	0.048398	0.0141213	0.000637658	40	14	14	14	21	8	7	8	8	15	19	0.0475243	-0.123567
CMTM7	CKLF like MARVEL transmembrane domain containing 7	coding	yellow	-0.138147	-0.931335	-0.936801	0.0938164	-0.539138	-0.0108376	-0.8157	-0.845791	-0.93627	-0.770401	-0.771862	0.395268	1.30351e-06	8.02015e-07	0.749722	0.0116672	0.979681	0.0252919	0.00814031	0.000616555	0.000777164	0.000108316	0.999991	9.79377e-06	7.10685e-06	0.849027	0.0185995	0.999965	0.115424	0.0514157	0.0126402	0.0141213	0.00177416	40	14	14	14	21	8	7	8	8	15	19	-1.13422	-1.82128
LTF	lactotransferrin	coding	blue	0.0305175	0.881078	0.905063	0.016841	0.890769	-0.227223	0.912692	0.881252	0.817164	0.770397	0.592156	0.851713	3.14579e-05	8.5916e-06	0.954432	6.2256e-08	0.588394	0.00412545	0.00382224	0.0132614	0.000777256	0.00755766	0.999991	0.00012135	4.52482e-05	0.974343	1.47306e-06	0.999965	0.0982526	0.0332346	0.0597613	0.0141213	0.0344881	40	14	14	14	21	8	7	8	8	15	19	-1.3305	-1.05421
GNB1	G protein subunit beta 1	coding	yellow	-0.000519149	-0.765243	-0.169074	-0.604905	-0.431161	-0.310141	-0.843792	-0.860252	-0.827629	-0.770182	-0.669387	0.997463	0.00142594	0.563384	0.0219152	0.051006	0.454699	0.0169968	0.00612792	0.0112054	0.000781547	0.00172071	0.999991	0.00303911	0.620502	0.0989311	0.0710946	0.999965	0.0997795	0.0436304	0.0537527	0.0141776	0.012469	40	14	14	14	21	8	7	8	8	15	19	1.874	1.57132
LRRC28	leucine rich repeat containing 28	coding	blue	0.0101989	0.832909	0.60668	0.61976	0.674287	-0.738033	0.812565	0.84839	0.92727	0.770114	0.806842	0.950197	0.000216973	0.0214267	0.0180766	0.000801914	0.036577	0.026334	0.00775158	0.000910108	0.000782918	2.99264e-05	0.999991	0.000605524	0.0342616	0.0892535	0.00163604	0.999965	0.117639	0.050097	0.0148494	0.0141776	0.000744919	40	14	14	14	21	8	7	8	8	15	19	-0.519083	-0.359624
CNOT3	CCR4-NOT transcription complex subunit 3	coding	yellow	-0.137764	-0.782228	-0.593151	-0.416861	-0.661125	-0.75267	-0.83503	-0.839102	-0.864544	-0.770001	-0.561981	0.396595	0.000945648	0.025364	0.138121	0.00110178	0.0311551	0.0193849	0.00919726	0.00559935	0.000785189	0.0122714	0.999991	0.00212644	0.0399512	0.298656	0.00218234	0.999965	0.103087	0.0555323	0.0365503	0.0141776	0.0477013	40	14	14	14	21	8	7	8	8	15	19	0.235817	0.0735405
GAS2L1	growth arrest specific 2 like 1	coding	blue	0.0288418	0.392769	0.16342	0.354643	0.269423	0.11468	0.771271	0.742515	0.803236	0.76999	0.548793	0.859772	0.164777	0.576689	0.213437	0.237585	0.786853	0.0423014	0.0348601	0.016345	0.000785406	0.0149625	0.999991	0.21055	0.633117	0.391899	0.286093	0.999965	0.156348	0.124031	0.0683265	0.0141776	0.0549523	40	14	14	14	21	8	7	8	8	15	19	0.501561	0.530454
ZBED4	zinc finger BED-type containing 4	coding	yellow	-0.0271561	-0.830423	-0.929101	0.492197	-0.831091	-0.168783	-0.883957	-0.89576	-0.734016	-0.769913	-0.463347	0.867894	0.000235728	1.57185e-06	0.0737992	3.06763e-06	0.689491	0.00826903	0.00261494	0.0381589	0.000786966	0.0457189	0.999991	0.000649125	1.18663e-05	0.201553	1.38174e-05	0.999965	0.0982526	0.027285	0.121695	0.0141776	0.118734	40	14	14	14	21	8	7	8	8	15	19	0.256612	-0.0722089
SDHAF2	succinate dehydrogenase complex assembly factor 2	coding	yellow	0.0120781	-0.0948921	-0.755829	0.616496	-0.370321	-0.164583	-0.709885	-0.947854	-0.932209	-0.769846	-0.694507	0.941035	0.746938	0.00176561	0.0188726	0.0984395	0.696934	0.073929	0.000340765	0.000739777	0.000788316	0.000968347	0.999991	0.787874	0.00373346	0.0910245	0.128818	0.999965	0.224476	0.0102839	0.0137769	0.0141776	0.00823707	40	14	14	14	21	8	7	8	8	15	19	-0.711036	-0.655063
SELENON	selenoprotein N	coding	blue	0.0228001	0.81641	0.796107	0.319392	0.767746	-0.159458	0.867309	0.934112	0.839849	0.769829	0.632852	0.88894	0.000367544	0.000657946	0.26566	4.84516e-05	0.706046	0.0114542	0.000680202	0.00907508	0.000788665	0.00363616	0.999991	0.00094965	0.00160674	0.446236	0.00013486	0.999965	0.0982526	0.0142876	0.0473409	0.0141776	0.0208334	40	14	14	14	21	8	7	8	8	15	19	2.18358	1.78931
PIAS1	protein inhibitor of activated STAT 1	coding	blue	0.0249485	0.672632	0.768664	-0.362737	0.666008	0.128843	0.841986	0.814317	0.844103	0.769796	0.659716	0.87855	0.00839308	0.00131628	0.202431	0.000981035	0.76108	0.0174744	0.0138588	0.00839924	0.000789329	0.00211752	0.999991	0.0145185	0.00290023	0.380095	0.00196347	0.999965	0.100897	0.0702947	0.0453882	0.0141776	0.0143494	40	14	14	14	21	8	7	8	8	15	19	0.58428	0.765661
EHD2	EH domain containing 2	coding	steelblue	0.00946137	-0.13024	0.0686381	-0.207984	-0.0181237	-0.583929	0.874226	0.824475	0.920806	0.769724	0.561349	0.953794	0.657204	0.815645	0.475528	0.937849	0.128555	0.0100582	0.011802	0.0011691	0.000790785	0.0123907	0.999991	0.708107	0.847829	0.64379	0.94964	0.999965	0.0982526	0.0644305	0.0168566	0.0141837	0.0480027	40	14	14	14	21	8	7	8	8	15	19	1.90601	1.59075
TGFBRAP1	transforming growth factor beta receptor associated protein 1	coding	yellow	-0.00791971	-0.929306	-0.961427	0.446493	-0.818889	-0.319201	-0.882784	-0.977041	-0.97068	-0.769666	-0.485981	0.961317	1.54545e-06	4.37534e-08	0.109505	5.65708e-06	0.440909	0.00847405	2.97347e-05	6.16375e-05	0.000791969	0.0348916	0.999991	1.1134e-05	8.06504e-07	0.258385	2.20851e-05	0.999965	0.0982526	0.0039175	0.00526626	0.0141848	0.0982639	40	14	14	14	21	8	7	8	8	15	19	0.426968	0.387765
PRKAA2	protein kinase AMP-activated catalytic subunit alpha 2	coding	green	-0.0156945	0.417174	0.72552	-0.228762	0.531099	0.575325	0.89285	0.946545	0.98591	0.769565	0.943955	0.923426	0.137795	0.00331468	0.431478	0.013236	0.135668	0.00680829	0.000366707	6.91918e-06	0.000794007	1.31529e-09	0.999991	0.179876	0.00645529	0.606901	0.0208352	0.999965	0.0982526	0.0106831	0.00266847	0.0141965	7.747e-07	40	14	14	14	21	8	7	8	8	15	19	-0.470946	0.414569
YWHAB	tyrosine 3-monooxygenase/tryptophan 5-monooxygenase activation protein beta	coding	brown	0.00184798	-0.750181	-0.147389	-0.696154	-0.425458	0.31635	-0.907892	-0.977415	-0.787067	-0.769523	-0.816042	0.990971	0.00199836	0.615088	0.00568259	0.0545023	0.44523	0.0047035	2.83141e-05	0.0204459	0.000794868	2.04381e-05	0.999991	0.00405932	0.669517	0.0466096	0.075535	0.999965	0.0982526	0.00389165	0.0796482	0.0141965	0.000577489	40	14	14	14	21	8	7	8	8	15	19	1.62304	1.55782
EXTL3	exostosin like glycosyltransferase 3	coding	salmon	-0.00485806	-0.501724	-0.820542	0.592698	-0.619437	-0.0640837	-0.869383	-0.941851	-0.959951	-0.769367	-0.719625	0.976266	0.067554	0.00032369	0.0255044	0.00274832	0.880172	0.0110247	0.000470359	0.000155808	0.000798052	0.000513881	0.999991	0.0951883	0.000878715	0.107108	0.00500036	0.999965	0.0982526	0.0119913	0.00716433	0.0142332	0.00530452	40	14	14	14	21	8	7	8	8	15	19	0.989189	0.617341
GOLM1	golgi membrane protein 1	coding	blue	0.00349043	-0.0295475	0.0799965	-0.557622	0.0173389	0.0958355	0.871035	0.799111	0.826784	0.769305	0.626908	0.982946	0.92013	0.785739	0.0382759	0.940536	0.821406	0.0106893	0.017337	0.0113635	0.000799317	0.00407133	0.999991	0.934467	0.822132	0.134931	0.951623	0.999965	0.0982526	0.0803709	0.054223	0.0142357	0.0224127	40	14	14	14	21	8	7	8	8	15	19	1.2516	1.42906
NSF	N-ethylmaleimide sensitive factor, vesicle fusing ATPase	coding	red	-0.000832049	-0.710896	-0.648492	-0.197499	-0.643228	0.225282	0.871433	0.919122	0.801545	0.769194	0.43444	0.995934	0.00436953	0.0121194	0.498539	0.00165787	0.591671	0.0106093	0.00124367	0.0167472	0.000801572	0.0630756	0.999991	0.00810039	0.0206313	0.662954	0.0031534	0.999965	0.0982526	0.0189017	0.0693757	0.014239	0.149606	40	14	14	14	21	8	7	8	8	15	19	0.225168	0.135306
SWT1	SWT1 RNA endoribonuclease homolog	coding	blue	0.0553795	0.803218	0.667427	0.775011	0.719491	0.430478	0.848095	0.830839	0.810243	0.769185	0.454882	0.734305	0.000540594	0.00910918	0.00113067	0.000236583	0.287026	0.015889	0.0106181	0.0147431	0.000801753	0.0503684	0.999991	0.00131711	0.015967	0.0210254	0.00054781	0.999965	0.0984887	0.0604896	0.0639321	0.014239	0.127102	40	14	14	14	21	8	7	8	8	15	19	-0.889157	-0.400088
PFDN1	prefoldin subunit 1	coding	yellow	-0.0432562	-0.949863	-0.951121	0.123177	-0.620537	-0.199876	-0.722602	-0.825118	-0.917453	-0.76902	-0.849805	0.79099	2.05751e-07	1.77127e-07	0.674837	0.00268723	0.635094	0.0665923	0.0116788	0.00132056	0.000805148	4.11834e-06	0.999991	2.47312e-06	2.26468e-06	0.799373	0.00489626	0.999965	0.209364	0.0641318	0.0178991	0.0142763	0.000195776	40	14	14	14	21	8	7	8	8	15	19	0.271788	0.129399
RALGDS	ral guanine nucleotide dissociation stimulator	coding	salmon	0.0103583	0.298581	-0.605805	0.728628	-0.127749	-0.022568	-0.810296	-0.86766	-0.920146	-0.768973	-0.817843	0.949419	0.299771	0.0216666	0.0031189	0.581058	0.957699	0.0271033	0.00523455	0.00119799	0.000806109	1.89216e-05	0.999991	0.356863	0.0346102	0.0340135	0.632313	0.999965	0.119233	0.0398021	0.0169828	0.0142763	0.000543781	40	14	14	14	21	8	7	8	8	15	19	-0.397807	-0.372821
KLF16	Kruppel like factor 16	coding	yellow	-0.0432833	-0.578268	-0.374077	-0.36923	-0.44332	0.418516	-0.883002	-0.92948	-0.858723	-0.768788	-0.470588	0.790862	0.0302959	0.187628	0.193868	0.0441291	0.302099	0.00843567	0.000831044	0.00632363	0.000809935	0.0420081	0.999991	0.0462113	0.238904	0.370361	0.0622851	0.999965	0.0982526	0.0158263	0.0386526	0.014321	0.111385	40	14	14	14	21	8	7	8	8	15	19	-0.217344	-0.00974339
B4GALT2	beta-1,4-galactosyltransferase 2	coding	yellow	-0.0289832	-0.80692	-0.824884	0.243489	-0.821621	-0.459557	-0.897161	-0.97397	-0.926188	-0.768741	-0.629683	0.859092	0.000486524	0.000282259	0.401556	4.95237e-06	0.251963	0.00615872	4.32348e-05	0.00095054	0.000810902	0.00386314	0.999991	0.00120323	0.000781511	0.578917	1.98048e-05	0.999965	0.0982526	0.00433892	0.0151	0.014321	0.0216052	40	14	14	14	21	8	7	8	8	15	19	0.899339	0.42202
AMPD2	adenosine monophosphate deaminase 2	coding	lightcyan	-0.00609934	0.0129532	-0.048534	0.494905	-0.0921311	-0.324266	0.826486	0.90104	0.957777	0.76865	0.771904	0.970204	0.964945	0.869131	0.0719836	0.691226	0.433277	0.0218866	0.00224655	0.000182274	0.00081278	0.000108164	0.999991	0.971089	0.893437	0.198481	0.734971	0.999965	0.107629	0.0253976	0.00759529	0.0143342	0.00177398	40	14	14	14	21	8	7	8	8	15	19	0.861697	0.879981
LONP1	lon peptidase 1, mitochondrial	coding	brown	-0.0419893	-0.929267	-0.917531	-0.162576	-0.61568	-0.420939	-0.854749	-0.916522	-0.762931	-0.768313	-0.545815	0.796981	1.55043e-06	3.79505e-06	0.578686	0.0029659	0.299016	0.0142592	0.00136476	0.0276675	0.000819773	0.0156311	0.999991	1.11536e-05	2.38511e-05	0.72847	0.00536458	0.999965	0.0982526	0.0197907	0.097889	0.0144374	0.0566347	40	14	14	14	21	8	7	8	8	15	19	0.442579	0.43303
YIPF5	Yip1 domain family member 5	coding	brown	0.00106284	-0.474133	-0.103178	-0.440091	-0.281994	-0.0736369	-0.850717	-0.926163	-0.713437	-0.767946	-0.638327	0.994807	0.0867449	0.725586	0.115309	0.215549	0.862429	0.0152348	0.000951456	0.0469111	0.000827451	0.00326989	0.999991	0.11884	0.768288	0.26656	0.262154	0.999965	0.0984424	0.0168216	0.138628	0.0145346	0.0194395	40	14	14	14	21	8	7	8	8	15	19	0.461585	0.674117
ZBTB42	zinc finger and BTB domain containing 42	coding	tan	0.0149769	0.594023	0.635519	-0.0130969	0.603455	-0.162209	-0.913354	-0.899626	-0.793657	-0.76794	-0.444334	0.926918	0.0250949	0.0145855	0.964556	0.0037761	0.701151	0.00404917	0.00234164	0.0187052	0.000827593	0.0566555	0.999991	0.0389931	0.0242996	0.980451	0.00667815	0.999965	0.0982526	0.0258842	0.0749214	0.0145346	0.138597	40	14	14	14	21	8	7	8	8	15	19	-0.486604	-0.634387
CDC34	cell division cycle 34, ubiqiutin conjugating enzyme	coding	yellow	-0.0923474	-0.571071	-0.555095	0.493296	-0.221364	0.249747	-0.753969	-0.817107	-0.869759	-0.767858	-0.796343	0.570885	0.0329217	0.0393492	0.0730587	0.334878	0.550832	0.0502514	0.0132732	0.0049977	0.00082931	4.51637e-05	0.999991	0.0499155	0.0593477	0.20057	0.389239	0.999965	0.174472	0.0684799	0.034327	0.0145415	0.000989765	40	14	14	14	21	8	7	8	8	15	19	0.0404535	-0.00235964
ZCCHC24	zinc finger CCHC-type containing 24	coding	blue	0.0160934	0.956596	0.966593	-0.254706	0.909574	-0.0250448	0.893365	0.981184	0.921925	0.767812	0.699065	0.921486	8.78867e-08	1.86727e-08	0.379514	1.11548e-08	0.953061	0.00672868	1.64193e-05	0.00112124	0.000830285	0.000867193	0.999991	1.34056e-06	4.53244e-07	0.558343	1.19401e-06	0.999965	0.0982526	0.00357007	0.0164907	0.0145415	0.00761504	40	14	14	14	21	8	7	8	8	15	19	1.03618	0.851002
ADCY7	adenylate cyclase 7	coding	blue	-0.0268503	0.275741	0.148567	0.106591	0.201561	-0.0147789	0.868979	0.950983	0.875542	0.767681	0.479046	0.869368	0.339976	0.612233	0.716844	0.380947	0.972294	0.0111077	0.000283705	0.00438093	0.000833042	0.0379719	0.999991	0.398571	0.667041	0.828504	0.436329	0.999965	0.0982526	0.00946556	0.0317998	0.0145696	0.103975	40	14	14	14	21	8	7	8	8	15	19	-0.0268573	-1.01543
DNAJA1	DnaJ heat shock protein family (Hsp40) member A1	coding	darkgreen	-0.00629931	-0.593169	-0.304373	-0.712716	-0.399009	0.715476	0.811681	0.904085	0.963394	0.767501	0.900561	0.969227	0.0253582	0.290033	0.00422554	0.0731661	0.0459947	0.0266321	0.00205032	0.000119284	0.000836862	1.48035e-07	0.999991	0.0393393	0.349249	0.03946	0.0985812	0.999965	0.118195	0.0243668	0.00632761	0.0146162	1.81592e-05	40	14	14	14	21	8	7	8	8	15	19	1.11006	1.33205
SLCO2A1	solute carrier organic anion transporter family member 2A1	coding	blue	0.00986005	0.919141	0.992545	-0.625533	0.832723	0.163023	0.929395	0.89809	0.842115	0.767323	0.557962	0.951849	3.38372e-06	2.43821e-12	0.0167314	2.8163e-06	0.699704	0.0024486	0.00244788	0.00871101	0.000840626	0.0130465	0.999991	2.08109e-05	2.02717e-09	0.0850324	1.29142e-05	0.999965	0.0982526	0.0262763	0.0461654	0.0146617	0.0498862	40	14	14	14	21	8	7	8	8	15	19	3.09323	2.66996
SMPD4	sphingomyelin phosphodiesterase 4	coding	turquoise	-0.0863093	-0.940773	-0.931221	-0.635271	-0.748672	-0.539969	-0.84117	-0.874406	-0.894544	-0.767252	-0.785551	0.596425	5.48088e-07	1.31629e-06	0.0146361	9.45242e-05	0.167141	0.0176927	0.00449795	0.00270497	0.000842145	6.73287e-05	0.999991	5.02944e-06	1.02617e-05	0.0789241	0.000241564	0.999965	0.101101	0.036378	0.024817	0.0146679	0.00131182	40	14	14	14	21	8	7	8	8	15	19	0.461585	0.0670117
AVPI1	arginine vasopressin induced 1	coding	blue	0.00862726	0.880153	0.915695	-0.54797	0.869726	0.0191217	0.766384	0.920089	0.941739	0.767028	0.84537	0.957864	3.28868e-05	4.31343e-06	0.0424955	3.04842e-07	0.964156	0.0444707	0.00120048	0.000473052	0.00084693	5.1911e-06	0.999991	0.000125902	2.64004e-05	0.144993	2.96062e-06	0.999965	0.16145	0.018684	0.0113133	0.014731	0.000235556	40	14	14	14	21	8	7	8	8	15	19	-0.176551	0.169613
C12orf66			blue	0.00839508	0.628903	0.342288	0.45194	0.477917	0.187687	0.828313	0.917786	0.79828	0.766965	0.735221	0.958997	0.0159819	0.230944	0.104727	0.0284349	0.656264	0.0213371	0.001305	0.0175412	0.000848273	0.000335083	0.999991	0.0259511	0.286444	0.251191	0.0417026	0.999965	0.106686	0.0194138	0.0714659	0.0147341	0.00383631	40	14	14	14	21	8	7	8	8	15	19	-0.519083	-0.77025
CEP112	centrosomal protein 112	coding	blue	0.0358588	0.963133	0.964725	0.455675	0.897201	-0.549989	0.847325	0.833051	0.833177	0.766876	0.701021	0.826128	3.34766e-08	2.57794e-08	0.101535	3.5896e-08	0.157856	0.0160842	0.0102251	0.010203	0.000850198	0.00082659	0.999991	6.80565e-07	5.61262e-07	0.245913	1.32035e-06	0.999965	0.0985974	0.0590665	0.0507542	0.0147473	0.00736591	40	14	14	14	21	8	7	8	8	15	19	0.276769	0.495277
NFIC	nuclear factor I C	coding	skyblue	0.0313217	0.380661	0.661427	-0.555822	0.522847	-0.69171	-0.893631	-0.811166	-0.877151	-0.766804	-0.704895	0.847851	0.17936	0.00999212	0.0390383	0.0150201	0.0573588	0.00668789	0.0145398	0.00421853	0.000851731	0.000750879	0.999991	0.226914	0.0173677	0.136818	0.0233528	0.999965	0.0982526	0.0724412	0.0311916	0.0147536	0.00687586	40	14	14	14	21	8	7	8	8	15	19	1.63887	1.32948
PYCARD	PYD and CARD domain containing	coding	orange	-0.0172962	0.0547916	0.0984995	-0.0564465	0.0977936	-0.0690317	-0.798727	-0.851494	-0.846784	-0.766705	-0.628639	0.915638	0.852417	0.737621	0.848006	0.673231	0.870976	0.0312183	0.00730296	0.00799036	0.00085387	0.0039404	0.999991	0.878326	0.778565	0.910458	0.718397	0.999965	0.129386	0.0484755	0.0440182	0.0147546	0.0218825	40	14	14	14	21	8	7	8	8	15	19	-0.833159	-0.823067
ANKRD52	ankyrin repeat domain 52	coding	brown	-0.0417108	-0.894366	-0.831417	-0.56879	-0.863275	-0.170081	-0.870385	-0.910091	-0.813733	-0.766651	-0.516629	0.7983	1.59188e-05	0.000228076	0.0337881	4.69957e-07	0.687195	0.0108205	0.00169664	0.0139836	0.000855036	0.0235254	0.999991	7.00392e-05	0.000651903	0.12581	3.84734e-06	0.999965	0.0982526	0.0222091	0.0619342	0.0147546	0.0746682	40	14	14	14	21	8	7	8	8	15	19	0.903179	0.464934
TMCO6	transmembrane and coiled-coil domains 6	coding	lightcyan	-0.00251214	-0.39315	-0.486113	0.162851	-0.43435	-0.286428	0.821046	0.890968	0.755535	0.766602	0.621945	0.987726	0.164332	0.0779951	0.578035	0.0491278	0.491598	0.0235693	0.00298122	0.0301556	0.000856083	0.0044668	0.999991	0.210024	0.109098	0.728014	0.0687192	0.999965	0.111373	0.0294159	0.103867	0.0147546	0.0237322	40	14	14	14	21	8	7	8	8	15	19	-0.119746	-0.523003
SLC27A4	solute carrier family 27 member 4	coding	pink	-0.0552454	-0.862451	-0.740918	-0.369046	-0.751222	-0.288128	0.855742	0.795332	0.868536	0.766553	0.628821	0.734925	7.22218e-05	0.00243211	0.194107	8.67421e-05	0.488915	0.0140246	0.0182781	0.00513484	0.000857155	0.00392683	0.999991	0.000240708	0.004912	0.370544	0.000224168	0.999965	0.0982526	0.0829301	0.0347762	0.0147546	0.0218455	40	14	14	14	21	8	7	8	8	15	19	0.450247	0.0927243
CPA3	carboxypeptidase A3	coding	salmon	-0.00395376	-0.0443136	-0.79025	0.69592	-0.377057	-0.0143949	-0.776254	-0.846966	-0.915761	-0.766516	-0.815318	0.980683	0.880433	0.000769251	0.00570566	0.0920001	0.973013	0.040151	0.00796297	0.00140163	0.00085795	2.10763e-05	0.999991	0.902048	0.00183913	0.0466977	0.121156	0.999965	0.151284	0.0508287	0.01852	0.0147546	0.000587313	40	14	14	14	21	8	7	8	8	15	19	-2.11274	-3.18406
POLR3GL	RNA polymerase III subunit GL	coding	blue	0.0077256	0.787289	0.770951	-0.0501647	0.769146	0.248762	0.875452	0.91995	0.766005	0.766357	0.453556	0.962264	0.000830982	0.00124678	0.86477	4.60212e-05	0.552456	0.0098216	0.00120664	0.026672	0.000861395	0.0511281	0.999991	0.00190324	0.00276675	0.919849	0.000129428	0.999965	0.0982526	0.0186965	0.0953367	0.0147546	0.128506	40	14	14	14	21	8	7	8	8	15	19	-0.589291	-0.169875
LINC02035	long intergenic non-protein coding RNA 2035	noncoding	blue	0.00999192	0.923181	0.815342	0.85196	0.827602	-0.0473984	0.860545	0.839445	0.928283	0.766278	0.791251	0.951206	2.51021e-06	0.000379625	0.000109611	3.67187e-06	0.911261	0.0129211	0.00914103	0.000873264	0.000863117	5.46836e-05	0.999991	1.63955e-05	0.00100721	0.011746	1.58575e-05	0.999965	0.0982526	0.055279	0.0147994	0.0147546	0.00112311	40	14	14	14	21	8	7	8	8	15	19	-0.519083	-0.880804
DAB2	DAB adaptor protein 2	coding	yellow	-0.00986126	-0.956895	-0.954687	0.355543	-0.898424	0.176647	-0.865865	-0.858889	-0.904267	-0.766209	-0.522854	0.951844	8.4367e-08	1.13307e-07	0.212195	3.21949e-08	0.675612	0.011759	0.00630211	0.00203894	0.000864619	0.021623	0.999991	1.301e-06	1.63933e-06	0.390455	1.27838e-06	0.999965	0.0982526	0.0444819	0.0219425	0.0147546	0.0706298	40	14	14	14	21	8	7	8	8	15	19	0.863732	0.858375
ASMTL	acetylserotonin O-methyltransferase like	coding	orange	-0.00370057	0.297071	-0.379263	0.523453	-0.0506313	-0.0327985	-0.719054	-0.926837	-0.90358	-0.766184	-0.87861	0.98192	0.302338	0.181095	0.0547355	0.827465	0.938547	0.0685975	0.000926123	0.00208209	0.000865149	7.46732e-07	0.999991	0.359379	0.231494	0.167627	0.855133	0.999965	0.213491	0.0165706	0.0222177	0.0147546	5.72268e-05	40	14	14	14	21	8	7	8	8	15	19	0.114341	0.00493723
HSP90AB1	heat shock protein 90 alpha family class B member 1	coding	red	-0.029885	-0.764887	-0.653105	-0.864175	-0.759116	0.0237259	0.848578	0.869	0.600368	0.766167	0.573161	0.854754	0.00143774	0.0113243	6.72196e-05	6.60484e-05	0.955531	0.0157672	0.00508245	0.115558	0.00086553	0.0103079	0.999991	0.00305859	0.0194191	0.0107201	0.000176497	0.999965	0.0984887	0.0388089	0.258122	0.0147546	0.0424571	40	14	14	14	21	8	7	8	8	15	19	2.44348	2.30625
PIN1	peptidylprolyl cis/trans isomerase, NIMA-interacting 1	coding	yellow	-0.0278217	-0.775999	-0.765504	-0.177409	-0.75826	0.104987	-0.731819	-0.956283	-0.955428	-0.766126	-0.762782	0.864685	0.00110375	0.00141733	0.544011	6.8062e-05	0.804592	0.0615313	0.000202087	0.000214043	0.000866425	0.000145933	0.999991	0.00243181	0.00309537	0.700646	0.000181281	0.999965	0.198688	0.00816419	0.00795806	0.0147546	0.00219159	40	14	14	14	21	8	7	8	8	15	19	0.276769	-0.0559929
TTC33	tetratricopeptide repeat domain 33	coding	blue	0.00168354	0.628224	0.623765	0.0412568	0.599342	0.146655	0.837441	0.883852	0.843603	0.766113	0.721623	0.991774	0.0161308	0.0171349	0.888633	0.00408706	0.72894	0.0187099	0.00358391	0.00847697	0.000866705	0.000487245	0.999991	0.0261639	0.0280699	0.933596	0.00717392	0.999965	0.102027	0.03209	0.0456032	0.0147546	0.00509144	40	14	14	14	21	8	7	8	8	15	19	-0.411798	-0.230433
TACC2	transforming acidic coiled-coil containing protein 2	coding	red	-0.000327731	-0.627475	-0.795738	0.655945	-0.686537	0.322735	0.901599	0.944014	0.790265	0.766101	0.462335	0.998399	0.0162964	0.000664562	0.0108552	0.000588193	0.435579	0.0055292	0.000420497	0.0195891	0.000866956	0.0462565	0.999991	0.0263953	0.00161977	0.0667627	0.00123509	0.999965	0.0982526	0.0114103	0.0772868	0.0147546	0.119753	40	14	14	14	21	8	7	8	8	15	19	0.483691	-0.141678
TMEM165	transmembrane protein 165	coding	brown	0.00256663	-0.791565	-0.470374	-0.662677	-0.605878	0.0127413	-0.816815	-0.983847	-0.895277	-0.765079	-0.787581	0.987459	0.000743036	0.0896261	0.00980295	0.00360239	0.976113	0.024927	1.04088e-05	0.00265043	0.000889507	6.25663e-05	0.999991	0.00173065	0.123712	0.0634866	0.00640138	0.999965	0.114736	0.00330387	0.024607	0.015118	0.00124005	40	14	14	14	21	8	7	8	8	15	19	0.758118	0.798802
FABP4	fatty acid binding protein 4	coding	yellow	-0.00624537	-0.919687	-0.960034	0.700244	-0.880608	-0.528475	-0.791302	-0.842437	-0.903634	-0.764995	-0.747438	0.969491	3.2529e-06	5.39731e-08	0.00529095	1.39114e-07	0.178146	0.0340318	0.00865994	0.00207866	0.000891367	0.000234791	0.999991	2.01731e-05	9.33638e-07	0.044722	1.92671e-06	0.999965	0.136657	0.0536001	0.0221999	0.0151293	0.00300601	40	14	14	14	21	8	7	8	8	15	19	-2.66991	-3.18406
TMBIM1	transmembrane BAX inhibitor motif containing 1	coding	blue	0.0173462	0.926105	0.953959	-0.809558	0.903314	-0.0354256	0.714972	0.817189	0.797058	0.76481	0.665311	0.915395	2.00165e-06	1.24491e-07	0.000450728	2.05476e-08	0.933633	0.0709449	0.0132563	0.0178443	0.000895515	0.00187965	0.999991	1.36227e-05	1.76083e-06	0.0166651	1.19401e-06	0.999965	0.218107	0.0684499	0.0722976	0.0151793	0.0132119	40	14	14	14	21	8	7	8	8	15	19	2.10751	1.91828
CCDC71L	coiled-coil domain containing 71 like	coding	brown	-0.0260296	-0.936172	-0.915089	-0.0680805	-0.821611	-0.838592	-0.890079	-0.793707	-0.858609	-0.764643	-0.450903	0.873328	8.4996e-07	4.49674e-06	0.81712	4.95472e-06	0.0092811	0.00724582	0.0186923	0.0063383	0.000899242	0.0526746	0.999991	6.93402e-06	2.72324e-05	0.892587	1.98079e-05	0.754738	0.0982526	0.0839361	0.0386627	0.0152221	0.131143	40	14	14	14	21	8	7	8	8	15	19	0.329212	0.0192784
TMEM134	transmembrane protein 134	coding	skyblue	0.00660943	0.254659	0.0633487	0.213181	0.152749	-0.0776093	-0.872	-0.945311	-0.875305	-0.764529	-0.492806	0.967713	0.379605	0.829655	0.464314	0.508601	0.855066	0.0104961	0.00039233	0.00440516	0.000901814	0.0320527	0.999991	0.440134	0.859072	0.63473	0.562912	0.999965	0.0982526	0.0110048	0.0318668	0.0152342	0.0924513	40	14	14	14	21	8	7	8	8	15	19	-0.486604	-0.489916
WLS	Wnt ligand secretion mediator	coding	blue	-0.00537964	0.778995	0.775075	-0.115185	0.769947	-0.300334	0.874911	0.950514	0.895817	0.764505	0.832224	0.973718	0.00102527	0.0011289	0.694978	4.46775e-05	0.46982	0.0099257	0.000291826	0.00261076	0.000902367	9.9071e-06	0.999991	0.00227767	0.00254818	0.812947	0.000126245	0.999965	0.0982526	0.00955993	0.0243818	0.0152342	0.000347023	40	14	14	14	21	8	7	8	8	15	19	1.23563	1.36529
ENPP2	ectonucleotide pyrophosphatase/phosphodiesterase 2	coding	tan	-0.000259353	0.94214	0.920727	-0.433032	0.885143	0.022814	-0.720299	-0.850362	-0.825958	-0.764424	-0.668304	0.998733	4.77835e-07	3.015e-06	0.121948	9.80758e-08	0.957239	0.0678905	0.00746466	0.0115191	0.000904176	0.0017618	0.999991	4.54396e-06	1.97639e-05	0.275155	1.66635e-06	0.999965	0.212336	0.0490833	0.0546972	0.0152392	0.0126746	40	14	14	14	21	8	7	8	8	15	19	-0.571024	-0.189411
MBOAT1	membrane bound O-acyltransferase domain containing 1	coding	blue	0.00889418	0.877251	0.831877	-0.0592508	0.841108	0.0372812	0.884015	0.933922	0.80991	0.764385	0.342056	0.956561	3.7717e-05	0.000224609	0.840541	1.78868e-06	0.930162	0.00825894	0.000686004	0.0148168	0.000905069	0.151734	0.999991	0.000140233	0.000644179	0.90703	9.21672e-06	0.999965	0.0982526	0.014338	0.0641857	0.0152392	0.284324	40	14	14	14	21	8	7	8	8	15	19	-0.733714	-0.414185
TANK	TRAF family member associated NFKB activator	coding	yellow	-0.014239	-0.57788	-0.72258	0.595559	-0.66471	0.259006	-0.928783	-0.961321	-0.927859	-0.764328	-0.586004	0.93051	0.0304334	0.00350866	0.0246264	0.00101197	0.535645	0.00250118	0.000140506	0.000888575	0.000906353	0.00837373	0.999991	0.0464099	0.00680163	0.10511	0.0020193	0.999965	0.0982526	0.00672992	0.0147994	0.0152405	0.0370391	40	14	14	14	21	8	7	8	8	15	19	-0.119746	-0.114707
PDE7B	phosphodiesterase 7B	coding	yellow	-0.0210763	-0.49686	-0.562042	0.0815272	-0.514131	-0.109725	-0.910596	-0.925593	-0.841437	-0.764128	-0.547943	0.89729	0.0706934	0.0364501	0.781729	0.0171104	0.795912	0.00437246	0.000973244	0.00881894	0.000910884	0.015151	0.999991	0.0989943	0.0554047	0.869237	0.0263117	0.999965	0.0982526	0.0169534	0.0464582	0.0152963	0.0554514	40	14	14	14	21	8	7	8	8	15	19	-0.455653	0.19682
RILP	Rab interacting lysosomal protein	coding	blue	0.0600059	0.0472415	0.137815	-0.0321041	0.0642659	-0.0501559	0.914941	0.950637	0.76804	0.764	0.519852	0.713016	0.87259	0.638474	0.913242	0.781967	0.906115	0.0038697	0.000289691	0.0260253	0.000913786	0.0225246	0.999991	0.895464	0.690692	0.949667	0.816446	0.999965	0.0982526	0.00953944	0.093838	0.0153171	0.072416	40	14	14	14	21	8	7	8	8	15	19	-0.889157	-0.676452
RASSF2	Ras association domain family member 2	coding	yellow	-0.00752153	-0.47481	-0.721702	0.459158	-0.544975	-0.189202	-0.873456	-0.949215	-0.852572	-0.763967	-0.583797	0.96326	0.0862329	0.0035683	0.0986198	0.0106259	0.653621	0.0102085	0.0003151	0.00715124	0.000914545	0.00868328	0.999991	0.118215	0.00690138	0.241816	0.0170795	0.999965	0.0982526	0.00978601	0.0416422	0.0153171	0.0380326	40	14	14	14	21	8	7	8	8	15	19	-0.0112926	-0.851264
ABCC5	ATP binding cassette subfamily C member 5	coding	darkorange	-0.0148358	0.462174	-0.415685	0.692522	0.0530957	-0.28024	0.558759	0.932524	0.90243	0.763761	0.771778	0.927604	0.0961421	0.139351	0.00604886	0.819198	0.501412	0.19228	0.000729716	0.00215551	0.000919247	0.000108621	0.999991	0.130372	0.183169	0.0483794	0.8488	0.999965	0.412799	0.0147742	0.0224888	0.015351	0.00177667	40	14	14	14	21	8	7	8	8	15	19	0.501561	0.276638
EVA1A	eva-1 homolog A, regulator of programmed cell death	coding	yellow	-0.0525012	-0.907661	-0.933912	0.715863	-0.895177	-0.185856	-0.900125	-0.954965	-0.880386	-0.763741	-0.581263	0.74765	7.31611e-06	1.04209e-06	0.00398545	4.28504e-08	0.659462	0.00573397	0.000220703	0.00390379	0.000919713	0.00905006	0.999991	3.76404e-05	8.58045e-06	0.0387131	1.35046e-06	0.999965	0.0982526	0.00847729	0.0300642	0.015351	0.0389021	40	14	14	14	21	8	7	8	8	15	19	-1.81553	-3.18406
CHSY3	chondroitin sulfate synthase 3	coding	darkgrey	0.00227868	0.358089	0.246984	0.193815	0.281209	-0.0382297	-0.920808	-0.920769	-0.838483	-0.763719	-0.508701	0.988866	0.208707	0.394618	0.506742	0.216882	0.928389	0.00324699	0.00117071	0.00929914	0.000920211	0.0261364	0.999991	0.259473	0.456411	0.670222	0.263573	0.999965	0.0982526	0.0184814	0.0478972	0.015351	0.0802562	40	14	14	14	21	8	7	8	8	15	19	-0.260836	-0.141678
TRIOBP	TRIO and F-actin binding protein	coding	blue	0.0148428	0.910915	0.896715	0.296475	0.876951	-0.184375	0.903614	0.785067	0.932353	0.763638	0.759633	0.92757	5.94219e-06	1.3983e-05	0.303357	1.82563e-07	0.662052	0.00525638	0.0209934	0.00073516	0.000922077	0.000161341	0.999991	3.19604e-05	6.65717e-05	0.485742	2.23863e-06	0.999965	0.0982526	0.089632	0.0137412	0.0153619	0.00234135	40	14	14	14	21	8	7	8	8	15	19	1.71273	1.49086
TMEM106B	transmembrane protein 106B	coding	blue	0.0325273	0.805974	0.774699	0.13083	0.797539	0.448467	0.854601	0.788497	0.963311	0.763465	0.558644	0.842067	0.000499905	0.00113926	0.655737	1.49145e-05	0.265068	0.0142943	0.02006	0.000120097	0.000926046	0.0129125	0.999991	0.00123222	0.00256975	0.785878	4.92028e-05	0.999965	0.0982526	0.0873269	0.00632761	0.0154077	0.0495232	40	14	14	14	21	8	7	8	8	15	19	0.415012	0.934169
TOB2	transducer of ERBB2, 2	coding	blue	0.00573428	0.395197	0.591943	-0.226456	0.464177	0.847328	0.883367	0.895852	0.872169	0.763356	0.135873	0.971986	0.161949	0.0257402	0.436264	0.0340286	0.00790885	0.00837178	0.00260818	0.00473432	0.000928564	0.579146	0.999991	0.207398	0.040453	0.610914	0.0491766	0.71776	0.0982526	0.0272565	0.0332771	0.015418	0.713841	40	14	14	14	21	8	7	8	8	15	19	0.865762	0.927649
TNFRSF10B	TNF receptor superfamily member 10b	coding	yellow	-0.0623522	-0.665835	-0.822596	0.593135	-0.73021	-0.0250035	-0.899018	-0.839078	-0.709596	-0.763332	-0.57276	0.7023	0.00933735	0.000303514	0.025369	0.000171175	0.953138	0.00589055	0.00920117	0.0486667	0.000929103	0.0103736	0.999991	0.0159879	0.000830543	0.106719	0.000409789	0.999965	0.0982526	0.0555323	0.142024	0.015418	0.0426769	40	14	14	14	21	8	7	8	8	15	19	1.4136	1.58054
ACTR3B	actin related protein 3B	coding	red	0.00247871	-0.334845	-0.231309	-0.121675	-0.272837	-0.087077	0.913749	0.81142	0.825303	0.763235	0.561431	0.987889	0.241906	0.426225	0.678606	0.231461	0.837554	0.00400398	0.0144842	0.0116436	0.000931359	0.0123754	0.999991	0.295518	0.487748	0.801731	0.279491	0.999965	0.0982526	0.0722779	0.0549791	0.0154299	0.0479873	40	14	14	14	21	8	7	8	8	15	19	-1.45613	-1.13989
SPAG9	sperm associated antigen 9	coding	blue	0.0140766	0.847916	0.866767	-0.23155	0.849371	0.167819	0.871687	0.976482	0.843752	0.763196	0.623788	0.9313	0.000127669	6.02331e-05	0.425731	1.11411e-06	0.691197	0.0105586	3.1947e-05	0.00845377	0.000932259	0.00431639	0.999991	0.000387605	0.000216377	0.601023	6.59853e-06	0.999965	0.0982526	0.0039175	0.045566	0.0154299	0.023234	40	14	14	14	21	8	7	8	8	15	19	1.28457	1.51864
RASGEF1B	RasGEF domain family member 1B	coding	blue	0.00691887	0.879604	0.949338	-0.457315	0.830359	-0.0896296	0.761836	0.819057	0.796388	0.763033	0.562722	0.966202	3.37597e-05	2.1876e-07	0.100155	3.18655e-06	0.832842	0.0465432	0.0128732	0.0180118	0.000936023	0.0121327	0.999991	0.000128273	2.66753e-06	0.2437	1.4168e-05	0.999965	0.166536	0.0673674	0.0727842	0.0154497	0.047322	40	14	14	14	21	8	7	8	8	15	19	0.480058	0.312999
FOSB	FosB proto-oncogene, AP-1 transcription factor subunit	coding	tan	0.27043	0.986081	0.987073	-0.191066	0.243037	-0.0132331	-0.517619	-0.885809	-0.835798	-0.762992	-0.643615	0.0914643	1.01896e-10	6.55245e-11	0.512904	0.288437	0.975191	0.234087	0.00341098	0.00974983	0.00093698	0.0029456	0.999991	1.7055e-08	1.139e-08	0.674537	0.340136	0.999965	0.466	0.0314998	0.0491913	0.0154497	0.0181075	40	14	14	14	21	8	7	8	8	15	19	3.00371	3.18225
ITGA9	integrin subunit alpha 9	coding	blue	0.0113361	0.89253	0.960965	-0.766189	0.854104	0.0606521	0.818502	0.826924	0.767001	0.762986	0.598249	0.944652	1.75805e-05	4.69502e-08	0.00139492	8.38744e-07	0.886556	0.0243806	0.0113372	0.0263543	0.000937125	0.00681451	0.999991	7.59239e-05	8.4167e-07	0.0232543	5.46697e-06	0.999965	0.11324	0.0629042	0.09459	0.0154497	0.0321408	40	14	14	14	21	8	7	8	8	15	19	0.705981	-0.334044
SEC23A	SEC23 homolog A, COPII coat complex component	coding	brown	-0.0136719	-0.852596	-0.789836	-0.360298	-0.822042	-0.440746	-0.883385	-0.967374	-0.848153	-0.762772	-0.564279	0.933271	0.000106968	0.000777649	0.205709	4.85085e-06	0.274387	0.00836855	8.47109e-05	0.00778644	0.000942105	0.011845	0.999991	0.000334722	0.0018557	0.383715	1.94949e-05	0.999965	0.0982526	0.00507663	0.043298	0.0155116	0.046646	40	14	14	14	21	8	7	8	8	15	19	1.14807	1.29057
SRSF9	serine and arginine rich splicing factor 9	coding	turquoise	-0.0313474	-0.78611	-0.706181	-0.106191	-0.740029	-0.0894517	-0.815233	-0.806415	-0.937378	-0.762709	-0.782178	0.847727	0.000856644	0.00476041	0.717867	0.000125572	0.833171	0.0254456	0.0156053	0.000585456	0.000943581	7.59311e-05	0.999991	0.00195422	0.00895899	0.829367	0.000310979	0.999965	0.11582	0.0756131	0.0123647	0.0155157	0.00142449	40	14	14	14	21	8	7	8	8	15	19	-0.101852	0.169613
PLEKHM1P1	pleckstrin homology and RUN domain containing M1 pseudogene 1	noncoding	blue	-0.0058351	0.798125	0.660623	0.599023	0.672552	-0.147056	0.867896	0.925288	0.750312	0.762566	0.518066	0.971494	0.000622743	0.0101154	0.0235937	0.000836944	0.72822	0.0113318	0.000985019	0.0319925	0.000946916	0.0230752	0.999991	0.00148746	0.0175627	0.102608	0.00170202	0.999965	0.0982526	0.0170158	0.107999	0.0155313	0.0736698	40	14	14	14	21	8	7	8	8	15	19	0.438711	0.399395
SSH1	slingshot protein phosphatase 1	coding	blue	0.0433108	0.916771	0.899558	-0.176931	0.882343	0.668462	0.875641	0.979094	0.88649	0.76256	0.806258	0.790732	4.00315e-06	1.19017e-05	0.545113	1.21902e-07	0.0699532	0.00978554	2.24869e-05	0.00335212	0.000947058	3.06389e-05	0.999991	2.3621e-05	5.8605e-05	0.701817	1.80643e-06	0.999965	0.0982526	0.00364605	0.027632	0.0155313	0.000753752	40	14	14	14	21	8	7	8	8	15	19	1.75073	1.35551
KIAA1324L			yellow	-0.0222567	-0.746069	-0.791045	0.436226	-0.743882	-0.193293	-0.898925	-0.899954	-0.810529	-0.7625	-0.556805	0.891571	0.00218259	0.000753314	0.118912	0.000110789	0.646501	0.00590382	0.00231936	0.0146799	0.000948478	0.0132769	0.999991	0.00438425	0.00180684	0.270961	0.000277851	0.999965	0.0982526	0.0257289	0.0637238	0.0155313	0.050401	40	14	14	14	21	8	7	8	8	15	19	-0.295453	-0.209583
CFP	complement factor properdin	coding	blue	0.0085727	0.907433	0.906066	0.307239	0.879041	0.497331	0.526978	0.96815	0.866378	0.762459	0.491688	0.95813	7.42136e-06	8.07894e-06	0.285284	1.56454e-07	0.209856	0.224235	7.88555e-05	0.00538271	0.000949443	0.0325049	0.999991	3.79716e-05	4.31959e-05	0.466678	2.03117e-06	0.999965	0.45469	0.00493627	0.0356735	0.0155313	0.0933934	40	14	14	14	21	8	7	8	8	15	19	-0.535945	-0.359624
MAGI1	membrane associated guanylate kinase, WW and PDZ domain containing 1	coding	grey60	-0.00105275	0.801213	0.360065	0.595727	0.561141	-0.108765	-0.872499	-0.837848	-0.810908	-0.762113	-0.501827	0.994856	0.00057183	0.206024	0.0245756	0.00813071	0.797668	0.0103971	0.00940461	0.0145963	0.000957585	0.0285797	0.999991	0.00138045	0.259015	0.104951	0.0134011	0.999965	0.0982526	0.0563608	0.0635399	0.0156443	0.0856376	40	14	14	14	21	8	7	8	8	15	19	0.682306	0.826417
ZNF546	zinc finger protein 546	coding	green	0.0302547	0.789561	0.667999	0.233865	0.725691	0.613042	0.741822	0.90289	0.91927	0.761911	0.861996	0.852976	0.000783271	0.00902824	0.420987	0.000196549	0.106069	0.0562833	0.00212596	0.00123701	0.000962361	2.0947e-06	0.999991	0.00180587	0.0158449	0.596591	0.000463601	0.999965	0.18834	0.0247572	0.0173434	0.015702	0.000123773	40	14	14	14	21	8	7	8	8	15	19	-0.64735	-0.443377
ADM	adrenomedullin	coding	darkgrey	0.0490012	0.292325	0.111664	0.349498	0.0628841	0.685561	-0.839886	-0.949456	-0.800309	-0.761752	-0.570441	0.763976	0.310497	0.703911	0.220623	0.78655	0.0605462	0.0180392	0.000310696	0.017045	0.00096616	0.0107605	0.999991	0.368004	0.749743	0.398996	0.820621	0.999965	0.101541	0.00978601	0.0702294	0.0157437	0.043583	40	14	14	14	21	8	7	8	8	15	19	-0.307409	2.09742
JMJD4	jumonji domain containing 4	coding	brown	-0.0656563	-0.907243	-0.916993	0.462168	-0.791505	-0.340364	-0.901061	-0.896559	-0.711334	-0.761631	-0.548149	0.687305	7.50992e-06	3.94129e-06	0.0961471	1.92199e-05	0.409392	0.00560341	0.00255683	0.0478672	0.00096904	0.0151052	0.999991	3.83379e-05	2.45505e-05	0.237873	6.08807e-05	0.999965	0.0982526	0.0269202	0.140408	0.0157517	0.0553287	40	14	14	14	21	8	7	8	8	15	19	-0.781558	-1.23934
MAP4K2	mitogen-activated protein kinase kinase kinase kinase 2	coding	lightcyan	-0.133103	-0.515018	-0.620576	0.352423	-0.482359	-0.0887635	0.859097	0.862366	0.940538	0.761627	0.840615	0.412913	0.0594824	0.0178816	0.216519	0.0267911	0.834441	0.0132483	0.00586369	0.000502452	0.000969147	6.60177e-06	0.999991	0.0848455	0.0291345	0.395135	0.0395209	0.999965	0.0982526	0.0424985	0.0117223	0.0157517	0.000271817	40	14	14	14	21	8	7	8	8	15	19	0.703392	0.863847
HS6ST2	heparan sulfate 6-O-sulfotransferase 2	coding	yellow	-0.038469	-0.941282	-0.964905	0.451215	-0.885042	0.0927496	-0.815636	-0.748233	-0.824972	-0.761466	-0.567923	0.813688	5.21013e-07	2.50099e-08	0.105355	9.88566e-08	0.827089	0.0253131	0.0327426	0.0117069	0.000972976	0.0111935	0.999991	4.83361e-06	5.52885e-07	0.252121	1.67566e-06	0.999965	0.115424	0.11942	0.0551063	0.0157937	0.0448059	40	14	14	14	21	8	7	8	8	15	19	-3.39233	-2.50267
PTEN	phosphatase and tensin homolog	coding	blue	0.0268308	0.799554	0.823054	0.000541467	0.826632	-0.307414	0.88043	0.960574	0.904419	0.761399	0.823079	0.869462	0.00059875	0.00029916	0.998534	3.85735e-06	0.458883	0.00889428	0.000148711	0.00202952	0.00097459	1.505e-05	0.999991	0.00143748	0.000821649	0.999086	1.64785e-05	0.999965	0.0982526	0.00690331	0.021897	0.0157996	0.00046191	40	14	14	14	21	8	7	8	8	15	19	0.910792	1.27579
NFE2L3	nuclear factor, erythroid 2 like 3	coding	brown	-0.0370583	-0.864429	-0.875045	0.102371	-0.883745	-0.273557	-0.88573	-0.933064	-0.766164	-0.761336	-0.532697	0.820406	6.65057e-05	4.17633e-05	0.72766	1.094e-07	0.512095	0.0079646	0.000712629	0.0266212	0.000976115	0.018865	0.999991	0.000223931	0.000159642	0.834581	1.7372e-06	0.999965	0.0982526	0.0146286	0.0952439	0.0158041	0.0642985	40	14	14	14	21	8	7	8	8	15	19	-0.0190289	-0.474012
PODXL	podocalyxin like	coding	blue	0.00133869	0.105007	0.394437	-0.208864	0.216531	-0.116109	0.856203	0.771966	0.828753	0.761172	0.585907	0.993459	0.720898	0.162832	0.473621	0.345803	0.784243	0.0139163	0.0248055	0.0109975	0.000980043	0.00838704	0.999991	0.765323	0.210489	0.642383	0.400428	0.999965	0.0982526	0.0994897	0.05324	0.0158296	0.0370689	40	14	14	14	21	8	7	8	8	15	19	2.19683	2.11506
COPE	COPI coat complex subunit epsilon	coding	yellow	-0.0224957	-0.692052	-0.826925	0.204454	-0.748539	-0.278425	-0.786291	-0.877131	-0.943143	-0.761166	-0.899156	0.890414	0.00609764	0.000264318	0.483219	9.49466e-05	0.504306	0.0360069	0.00422048	0.000440141	0.000980198	1.65965e-07	0.999991	0.0109198	0.000738142	0.650467	0.000242403	0.999965	0.141137	0.0349267	0.0109049	0.0158296	1.97984e-05	40	14	14	14	21	8	7	8	8	15	19	0.626427	0.375913
GLIS3	GLIS family zinc finger 3	coding	blue	0.0190946	0.984567	0.961613	-0.241028	0.595967	-0.104749	0.803021	0.827157	0.834062	0.761088	0.549039	0.906903	1.88685e-10	4.25216e-08	0.406479	0.00435783	0.805027	0.0296527	0.0112934	0.0100485	0.000982072	0.0149085	0.999991	2.51149e-08	7.89554e-07	0.583949	0.00758937	0.999965	0.125111	0.062744	0.0502626	0.0158393	0.0547859	40	14	14	14	21	8	7	8	8	15	19	0.415012	0.207377
FAM124A	family with sequence similarity 124 member A	coding	blue	0.0308732	0.47827	0.742801	-0.716147	0.588287	0.16828	0.848707	0.825467	0.662828	0.761037	0.553454	0.850005	0.0836495	0.00233841	0.00396427	0.0050299	0.690381	0.0157348	0.0116124	0.0732293	0.000983304	0.0139624	0.999991	0.115123	0.00475465	0.038709	0.00863704	0.999965	0.0984887	0.0638708	0.187547	0.0158393	0.0521424	40	14	14	14	21	8	7	8	8	15	19	0.652162	1.1532
FAM214A	family with sequence similarity 214 member A	coding	tan	0.0232962	0.622683	0.505583	0.470609	0.559967	0.00807618	-0.907913	-0.824155	-0.960222	-0.760853	-0.533184	0.886539	0.0173856	0.0651346	0.0894439	0.008294	0.984858	0.00470085	0.0118637	0.000152695	0.000987764	0.0187361	0.999991	0.0279756	0.0929497	0.227844	0.0136399	0.999965	0.0982526	0.064598	0.00711689	0.0158909	0.0640147	40	14	14	14	21	8	7	8	8	15	19	0.126926	0.290524
ARHGAP17	Rho GTPase activating protein 17	coding	skyblue	-0.0365435	-0.0815177	0.205786	-0.318424	0.125987	0.19844	-0.866337	-0.790477	-0.82413	-0.76069	-0.588524	0.82286	0.781754	0.480309	0.267193	0.586324	0.637578	0.0116588	0.019533	0.0118685	0.000991728	0.00803118	0.999991	0.81753	0.541842	0.447919	0.637386	0.999965	0.0982526	0.0859114	0.0555841	0.0159344	0.0359994	40	14	14	14	21	8	7	8	8	15	19	1.10303	0.904273
SIPA1	signal-induced proliferation-associated 1	coding	red	-0.0272039	-0.479896	-0.512494	0.237095	-0.463693	-0.46662	0.753174	0.80547	0.917667	0.760573	0.731743	0.867663	0.0824544	0.0609584	0.414413	0.0342403	0.24379	0.050635	0.0158229	0.00131056	0.000994568	0.000369523	0.999991	0.113626	0.0878026	0.591317	0.0494538	0.999965	0.175515	0.0760491	0.0178346	0.0159598	0.00413499	40	14	14	14	21	8	7	8	8	15	19	0.96175	0.808806
EPHX1	epoxide hydrolase 1	coding	blue	0.0201061	0.709439	0.665858	0.267728	0.647314	0.114084	0.887924	0.970524	0.971404	0.760286	0.68254	0.901995	0.00448751	0.00933397	0.354756	0.00151361	0.787942	0.00759717	6.26182e-05	5.72103e-05	0.00100159	0.00128208	0.999991	0.00829964	0.0163248	0.53499	0.00290038	0.999965	0.0982526	0.00473757	0.00520449	0.0160521	0.0101071	40	14	14	14	21	8	7	8	8	15	19	-0.0112926	0.0670117
EIF4EBP1	eukaryotic translation initiation factor 4E binding protein 1	coding	yellow	-0.105311	-0.943406	-0.946475	-0.112028	-0.419403	-0.0597733	-0.573261	-0.899681	-0.86899	-0.760148	-0.738544	0.51781	4.19616e-07	3.02344e-07	0.702985	0.0584118	0.888192	0.178487	0.00233789	0.00508362	0.00100499	0.000304761	0.999991	4.13888e-06	3.42269e-06	0.81853	0.0803981	0.999965	0.395958	0.0258842	0.0346214	0.0160861	0.00361172	40	14	14	14	21	8	7	8	8	15	19	0.31532	-0.263084
NDEL1	nudE neurodevelopment protein 1 like 1	coding	darkgrey	-0.0240923	0.219112	0.626104	-0.641661	0.411202	0.0266117	-0.890165	-0.968255	-0.784631	-0.760038	-0.596152	0.882688	0.451675	0.0166025	0.0133745	0.0640438	0.950127	0.00723204	7.80874e-05	0.0211139	0.00100769	0.00706321	0.999991	0.512788	0.0273002	0.0748652	0.0873438	0.999965	0.0982526	0.00493627	0.0815222	0.016109	0.0329938	40	14	14	14	21	8	7	8	8	15	19	0.847266	0.909357
THADA	THADA armadillo repeat containing	coding	blue	0.00173989	0.780967	0.833188	-0.589521	0.774252	-0.496957	0.78069	0.914814	0.794123	0.759662	0.635248	0.991499	0.000976092	0.000214948	0.0265069	3.80283e-05	0.210254	0.0382887	0.00144838	0.0185856	0.00101699	0.00347191	0.999991	0.00218261	0.000621688	0.109829	0.000109263	0.999965	0.14676	0.020395	0.0745368	0.0162281	0.0202782	40	14	14	14	21	8	7	8	8	15	19	0.620569	0.666674
ZNF81	zinc finger protein 81	coding	blue	0.0288798	0.910545	0.906179	0.318117	0.841749	0.237695	0.892279	0.883073	0.877292	0.759633	0.586201	0.859589	6.08654e-06	8.02319e-06	0.267679	1.72582e-06	0.570824	0.00689724	0.00365426	0.00420443	0.0010177	0.00834646	0.999991	3.25706e-05	4.29881e-05	0.448378	8.98804e-06	0.999965	0.0982526	0.0324268	0.0311089	0.0162281	0.03698	40	14	14	14	21	8	7	8	8	15	19	-0.176551	-0.0559929
DENND2A	DENN domain containing 2A	coding	blue	0.00476744	0.866532	0.956321	-0.612938	0.85091	-0.10291	0.840025	0.821923	0.797817	0.759293	0.691945	0.976708	6.08392e-05	9.12293e-08	0.0197701	1.01695e-06	0.808402	0.0180016	0.0122994	0.0176556	0.00102618	0.00102944	0.999991	0.000208486	1.39323e-06	0.0931947	6.19724e-06	0.999965	0.10153	0.0658405	0.0717632	0.0163293	0.00861991	40	14	14	14	21	8	7	8	8	15	19	-0.983257	-0.285847
HEATR5B	HEAT repeat containing 5B	coding	blue	0.0198563	0.898234	0.732497	0.322048	0.745655	-0.277644	0.742535	0.86343	0.882933	0.759225	0.716615	0.903206	1.28372e-05	0.00288805	0.261481	0.000104507	0.505552	0.055919	0.00573361	0.00366701	0.00102788	0.000556325	0.999991	5.88287e-05	0.00571597	0.442155	0.000264192	0.999965	0.187559	0.0420055	0.0289808	0.0163293	0.00557771	40	14	14	14	21	8	7	8	8	15	19	0.692933	0.837885
KEAP1	kelch like ECH associated protein 1	coding	pink	-0.0121107	-0.697539	-0.498853	-0.457674	-0.592275	-0.162424	0.737589	0.897162	0.948565	0.759223	0.866742	0.940876	0.00554749	0.0693948	0.0998543	0.00467096	0.700768	0.0584733	0.00251355	0.00032719	0.00102793	1.58223e-06	0.999991	0.010034	0.09833	0.24324	0.0080711	0.999965	0.192902	0.0267091	0.00971201	0.0163293	0.000100736	40	14	14	14	21	8	7	8	8	15	19	0.529179	0.447413
NPLOC4	NPL4 homolog, ubiquitin recognition factor	coding	yellow	0.00127811	-0.0937639	0.177355	-0.563015	0.0718152	-0.429224	-0.86672	-0.940388	-0.952346	-0.758987	-0.92596	0.993755	0.749858	0.544136	0.0360572	0.757058	0.288589	0.0115779	0.000506184	0.000260973	0.00103387	1.31822e-08	0.999991	0.790229	0.602346	0.130121	0.793913	0.999965	0.0982526	0.0124593	0.00869133	0.0164031	2.77814e-06	40	14	14	14	21	8	7	8	8	15	19	1.63005	1.14747
OGFR	opioid growth factor receptor	coding	grey	-0.0386072	-0.147216	-0.245077	0.0739062	-0.18861	-0.0275525	0.746212	0.909056	0.912404	0.758865	0.851775	0.81303	0.615509	0.398395	0.801743	0.41291	0.948365	0.0540603	0.00175451	0.00157187	0.00103694	3.70729e-06	0.999991	0.669861	0.459812	0.882259	0.46861	0.999965	0.183613	0.022478	0.0196406	0.0164311	0.000182226	40	14	14	14	21	8	7	8	8	15	19	0.480058	0.530454
PFKP	phosphofructokinase, platelet	coding	yellow	-0.0288211	-0.870049	-0.862382	-0.106033	-0.849618	-0.173255	-0.780129	-0.866274	-0.84228	-0.758787	-0.691239	0.859872	5.22451e-05	7.24262e-05	0.718272	1.098e-06	0.681589	0.0385216	0.00539486	0.00868488	0.0010389	0.00104683	0.999991	0.00018433	0.000251463	0.829608	6.53993e-06	0.999965	0.147362	0.0406353	0.046143	0.0164417	0.00873529	40	14	14	14	21	8	7	8	8	15	19	1.25944	1.12762
S100A10	S100 calcium binding protein A10	coding	blue	0.00938999	0.466711	0.739075	-0.482183	0.577774	0.480868	0.649398	0.954681	0.876507	0.758684	0.765165	0.954143	0.0924975	0.00252665	0.0807934	0.00608724	0.227722	0.114456	0.000224855	0.00428306	0.00104149	0.000135122	0.999991	0.125902	0.0050875	0.213358	0.0102905	0.999965	0.294944	0.00848742	0.0314478	0.0164621	0.00207357	40	14	14	14	21	8	7	8	8	15	19	1.74384	1.63209
C1orf115	chromosome 1 open reading frame 115	coding	blue	0.0153465	0.824474	0.798206	0.147317	0.763329	-0.154854	0.777132	0.812816	0.926969	0.758508	0.78789	0.925119	0.000285975	0.00062136	0.615263	5.6868e-05	0.714257	0.0397785	0.0141807	0.000921219	0.00104597	6.18653e-05	0.999991	0.000766621	0.00152832	0.755853	0.000154811	0.999965	0.150463	0.0713551	0.0148962	0.0165	0.00123001	40	14	14	14	21	8	7	8	8	15	19	0.692933	0.820602
SHE	Src homology 2 domain containing E	coding	blue	0.0183322	0.661999	0.681164	-0.0915563	0.658127	0.431717	0.891881	0.941654	0.762099	0.758487	0.569085	0.910605	0.0099052	0.00731436	0.755582	0.00118198	0.285486	0.00695955	0.000475083	0.0279409	0.0010465	0.0109919	0.999991	0.0168666	0.0131117	0.852229	0.00232083	0.999965	0.0982526	0.0120215	0.098563	0.0165	0.0442229	40	14	14	14	21	8	7	8	8	15	19	1.21212	1.3121
SPRY4	sprouty RTK signaling antagonist 4	coding	yellow	-0.046196	-0.728333	-0.761309	0.266896	-0.629041	0.721445	-0.836399	-0.769282	-0.885006	-0.758384	-0.591814	0.777134	0.0031371	0.0015609	0.356312	0.00225204	0.043375	0.019	0.0256356	0.00348122	0.00104911	0.00760125	0.999991	0.00603418	0.00336704	0.536632	0.0041616	0.999965	0.102519	0.101618	0.0281099	0.0165121	0.0346496	40	14	14	14	21	8	7	8	8	15	19	-0.12888	-0.944473
ITPRIP	inositol 1,4,5-trisphosphate receptor interacting protein	coding	blue	0.0395637	0.645287	0.449689	0.279138	0.526551	-0.105734	0.754593	0.903815	0.952875	0.758354	0.897767	0.808483	0.0126964	0.106683	0.333814	0.0141967	0.803221	0.0499516	0.00206727	0.00025248	0.00104988	1.85521e-07	0.999991	0.0211411	0.144356	0.516024	0.0221791	0.999965	0.173909	0.0244076	0.00855929	0.0165121	2.13264e-05	40	14	14	14	21	8	7	8	8	15	19	0.649351	0.852853
JAG1	jagged canonical Notch ligand 1	coding	blue	0.00582288	0.832024	0.855506	-0.305298	0.825802	0.353429	0.889159	0.792899	0.792189	0.75784	0.560311	0.971554	0.000223511	9.55362e-05	0.288497	4.02238e-06	0.390437	0.0073946	0.0189005	0.0190846	0.00106305	0.0125889	0.999991	0.000620073	0.000317158	0.470217	1.70035e-05	0.999965	0.0982526	0.0844342	0.075889	0.0166877	0.0486064	40	14	14	14	21	8	7	8	8	15	19	1.65858	1.5142
FXYD6	FXYD domain containing ion transport regulator 6	coding	blue	-0.0141351	0.829207	0.950295	-0.82706	0.727113	-0.140059	0.820187	0.942723	0.930033	0.757815	0.937848	0.931015	0.000245368	1.95505e-07	0.000263171	0.000188236	0.740804	0.0238416	0.000449809	0.000811995	0.00106369	3.10259e-09	0.999991	0.000671866	2.44284e-06	0.0139303	0.000445821	0.999965	0.112172	0.0118496	0.0144209	0.0166877	1.11321e-06	40	14	14	14	21	8	7	8	8	15	19	0.716236	0.418306
HMGXB3	HMG-box containing 3	coding	turquoise	-0.0484386	-0.80998	-0.838469	0.182602	-0.820556	0.84017	0.855237	0.820689	0.83684	0.75757	0.269903	0.76661	0.000445196	0.000179369	0.532087	5.21721e-06	0.00902286	0.0141437	0.0125443	0.00957341	0.00107002	0.263777	0.999991	0.00111542	0.000534429	0.690501	2.06872e-05	0.752664	0.0982526	0.0664808	0.0487342	0.0167662	0.420878	40	14	14	14	21	8	7	8	8	15	19	0.663284	0.447413
ITPR1	inositol 1,4,5-trisphosphate receptor type 1	coding	blue	0.0419896	0.98653	0.991091	-0.255207	0.202826	-0.480467	0.887026	0.896408	0.911311	0.75749	0.618753	0.79698	8.37941e-11	7.08159e-12	0.378544	0.377901	0.228166	0.00774626	0.00256772	0.00163006	0.00107208	0.0047374	0.999991	1.47163e-08	2.8886e-09	0.557469	0.433173	0.999965	0.0982526	0.0270124	0.0200703	0.0167778	0.0248463	40	14	14	14	21	8	7	8	8	15	19	1.6224	1.406
OAF	out at first homolog	coding	red	0.0209729	-0.356978	-0.655029	0.422022	-0.467382	0.0798631	0.911946	0.851821	0.86297	0.757174	0.662273	0.897791	0.210224	0.0110049	0.132812	0.0326527	0.850892	0.0042124	0.00725682	0.00578966	0.00108029	0.0020059	0.999991	0.261128	0.0189407	0.291463	0.0473882	0.999965	0.0982526	0.0482511	0.0371814	0.0168746	0.0138378	40	14	14	14	21	8	7	8	8	15	19	0.419021	0.18608
SUPT20H	SPT20 homolog, SAGA complex component	coding	brown	-0.0140008	-0.917498	-0.883226	-0.468245	-0.864633	-0.720308	-0.543099	-0.874812	-0.872621	-0.757149	-0.62456	0.931669	3.80399e-06	2.83354e-05	0.0912876	4.29817e-07	0.0438668	0.207733	0.00445589	0.00468589	0.00108093	0.0042547	0.999991	2.27537e-05	0.000117707	0.230728	3.65995e-06	0.999965	0.433248	0.0361416	0.0331208	0.0168746	0.0229997	40	14	14	14	21	8	7	8	8	15	19	0.490897	0.367884
INSIG2	insulin induced gene 2	coding	black	0.0094307	0.692198	0.801389	-0.330744	0.669946	0.0539382	-0.871855	-0.982987	-0.715845	-0.756757	-0.561317	0.953944	0.00608247	0.000569023	0.248078	0.000892005	0.899062	0.010525	1.21548e-05	0.0458302	0.00109121	0.0123969	0.999991	0.0108942	0.00141751	0.428721	0.00180076	0.999965	0.0982526	0.00330387	0.136873	0.0170103	0.0480119	40	14	14	14	21	8	7	8	8	15	19	0.16917	0.533556
GBF1	golgi brefeldin A resistant guanine nucleotide exchange factor 1	coding	yellow	-0.0293621	-0.634368	-0.554849	-0.0198054	-0.52351	-0.576809	-0.808113	-0.864287	-0.874352	-0.756715	-0.419913	0.857269	0.0148217	0.0394551	0.946421	0.0148699	0.134426	0.0278545	0.00563009	0.00450352	0.00109232	0.073471	0.999991	0.0242458	0.059486	0.969504	0.0231336	0.999965	0.120842	0.0414875	0.0323012	0.0170103	0.167214	40	14	14	14	21	8	7	8	8	15	19	1.27702	0.945417
DCAF17	DDB1 and CUL4 associated factor 17	coding	blue	0.00375074	0.229916	0.531418	-0.400363	0.365033	0.340554	0.699611	0.862544	0.861354	0.75646	0.744758	0.981675	0.429095	0.0505105	0.156039	0.10372	0.409114	0.0801574	0.00584179	0.0059893	0.00109904	0.000254262	0.999991	0.489791	0.0741473	0.322527	0.135169	0.999965	0.236931	0.0424745	0.0377212	0.0170718	0.00318331	40	14	14	14	21	8	7	8	8	15	19	0.0260797	-0.0247799
ZNF70	zinc finger protein 70	coding	skyblue	-0.0154401	0.359581	0.187219	0.235532	0.25425	-0.732357	-0.830098	-0.954028	-0.779488	-0.756419	-0.511948	0.924664	0.206678	0.521586	0.417586	0.266061	0.0388241	0.0208079	0.000234604	0.0225684	0.00110011	0.0250409	0.999991	0.257457	0.581301	0.593834	0.316615	0.999965	0.105584	0.00867939	0.0853146	0.0170718	0.077914	40	14	14	14	21	8	7	8	8	15	19	0.151397	0.123435
FILIP1L	filamin A interacting protein 1 like	coding	blue	0.00603594	0.865003	0.963032	-0.546843	0.829654	-0.282684	0.887239	0.877578	0.928291	0.756412	0.537133	0.970513	6.49191e-05	3.40237e-08	0.0430093	3.30498e-06	0.497528	0.00771073	0.00417605	0.000872976	0.00110032	0.017717	0.999991	0.000219963	6.82904e-07	0.145805	1.45615e-05	0.999965	0.0982526	0.0346652	0.0147994	0.0170718	0.0616147	40	14	14	14	21	8	7	8	8	15	19	1.18525	0.953328
GPR162	G protein-coupled receptor 162	coding	blue	0.00821071	0.914015	0.753557	0.507176	0.777448	0.136122	0.919704	0.885515	0.805962	0.756308	0.581616	0.959897	4.83758e-06	0.00185648	0.0641543	3.36633e-05	0.747907	0.00335931	0.00343663	0.0157094	0.00110308	0.00899818	0.999991	2.74511e-05	0.00390471	0.185509	9.82851e-05	0.999965	0.0982526	0.0316275	0.0665254	0.0170936	0.0387997	40	14	14	14	21	8	7	8	8	15	19	0.192145	0.105192
FOXP4	forkhead box P4	coding	blue	0.0238546	0.691116	0.761414	-0.407268	0.700497	-0.0401743	0.874356	0.869366	0.791736	0.756145	0.53126	0.883837	0.00619553	0.00155717	0.148363	0.000405755	0.924754	0.010033	0.00504152	0.0192025	0.00110739	0.0192493	0.999991	0.0110731	0.00335957	0.31231	0.000884462	0.999965	0.0982526	0.0386598	0.0762372	0.0171376	0.0652333	40	14	14	14	21	8	7	8	8	15	19	1.00249	0.902569
TMEM150A	transmembrane protein 150A	coding	lightcyan	0.0112636	-0.127766	-0.526781	0.367148	-0.297083	0.158472	0.538791	0.900963	0.964417	0.756099	0.775597	0.945005	0.66336	0.0529402	0.196588	0.19094	0.707803	0.212084	0.00225167	0.000109647	0.00110863	9.54467e-05	0.999991	0.713403	0.0773548	0.373301	0.234776	0.999965	0.438776	0.0254117	0.00615068	0.0171376	0.00164513	40	14	14	14	21	8	7	8	8	15	19	-0.0930843	-0.241126
SLC12A6	solute carrier family 12 member 6	coding	blue	0.0175973	0.932518	0.882515	0.249483	0.863819	0.11298	0.783159	0.959055	0.89353	0.755924	0.730858	0.914175	1.17757e-06	2.93402e-05	0.389694	4.5349e-07	0.789958	0.0372733	0.000166383	0.00278154	0.0011133	0.000378754	0.999991	9.019e-06	0.000120535	0.568013	3.77027e-06	0.999965	0.144355	0.00738214	0.0253404	0.0171888	0.00419749	40	14	14	14	21	8	7	8	8	15	19	0.936765	0.930918
SNX3	sorting nexin 3	coding	blue	0.0451004	-0.215976	0.181739	-0.570947	-0.015749	0.0709704	0.60227	0.924607	0.931965	0.755642	0.652549	0.78229	0.458339	0.53406	0.0329686	0.94598	0.867377	0.152411	0.00101169	0.000747665	0.00112084	0.00245832	0.999991	0.519467	0.593114	0.12457	0.95596	0.999965	0.357623	0.0172178	0.013822	0.0172685	0.0159658	40	14	14	14	21	8	7	8	8	15	19	0.755727	0.943823
MOV10L1	Mov10 like RISC complex RNA helicase 1	coding	darkgrey	-0.0144341	0.793067	-0.302916	0.619461	0.405186	-0.468962	-0.885344	-0.968753	-0.910284	-0.755601	-0.529443	0.92956	0.00071397	0.292466	0.0181483	0.0684302	0.241112	0.00803044	7.44975e-05	0.00168603	0.00112195	0.0197438	0.999991	0.00167312	0.351777	0.089433	0.0928035	0.999965	0.0982526	0.00490513	0.0204624	0.0172685	0.0662933	40	14	14	14	21	8	7	8	8	15	19	0.208864	-0.105971
ST3GAL3	ST3 beta-galactoside alpha-2,3-sialyltransferase 3	coding	yellow	0.0135267	0.110872	-0.29716	0.555384	-0.0734476	-0.785725	-0.803732	-0.849788	-0.845895	-0.755541	-0.694557	0.933978	0.705925	0.302188	0.0392256	0.751701	0.0208123	0.0293978	0.00754746	0.00812443	0.00112356	0.000967201	0.999991	0.752586	0.362092	0.137284	0.789605	0.960479	0.12468	0.0493822	0.0443581	0.0172685	0.00823586	40	14	14	14	21	8	7	8	8	15	19	-0.64735	-1.18763
FUT4	fucosyltransferase 4	coding	brown	0.00783217	-0.170351	-0.0639543	-0.103555	-0.109558	0.283957	-0.868812	-0.936688	-0.840002	-0.755527	-0.563338	0.961744	0.560397	0.828048	0.724619	0.636396	0.495508	0.011142	0.000604698	0.00905022	0.00112392	0.0120183	0.999991	0.618938	0.857759	0.83339	0.684637	0.999965	0.0982526	0.0135335	0.0472698	0.0172685	0.0470498	40	14	14	14	21	8	7	8	8	15	19	-0.470946	-0.346702
C7orf49			orange	-0.0170481	0.0878055	0.115521	-0.0976442	0.0733163	-0.415004	-0.866523	-0.913479	-0.98144	-0.755336	-0.840557	0.916844	0.765334	0.694126	0.739827	0.752132	0.306596	0.0116195	0.00151597	1.57629e-05	0.00112908	6.62078e-06	0.999991	0.803858	0.741006	0.842602	0.789794	0.999965	0.0982526	0.0209793	0.00344828	0.0173138	0.000271817	40	14	14	14	21	8	7	8	8	15	19	-0.344641	-0.594994
BCKDK	branched chain keto acid dehydrogenase kinase	coding	yellow	-0.0392889	-0.952784	-0.954584	0.145565	-0.87315	-0.334497	-0.863991	-0.869594	-0.712043	-0.755317	-0.551236	0.809789	1.44436e-07	1.14839e-07	0.619518	2.4001e-07	0.418031	0.0121611	0.00501599	0.0475435	0.00112961	0.0144315	0.999991	1.91685e-06	1.65235e-06	0.758942	2.58007e-06	0.999965	0.0982526	0.0386262	0.139681	0.0173138	0.053374	40	14	14	14	21	8	7	8	8	15	19	0.342818	0.23301
SEC63	SEC63 homolog, protein translocation regulator	coding	skyblue	0.0176899	0.356945	0.741811	-0.541523	0.51182	0.319596	-0.845352	-0.763762	-0.68966	-0.755096	-0.448736	0.913725	0.21027	0.0023873	0.0454974	0.0177021	0.440312	0.0165901	0.0273964	0.0584103	0.00113557	0.0539636	0.999991	0.261159	0.00483772	0.150606	0.0271227	0.999965	0.0992748	0.106225	0.16088	0.0173561	0.133554	40	14	14	14	21	8	7	8	8	15	19	0.549158	0.782453
NME4	NME/NM23 nucleoside diphosphate kinase 4	coding	yellow	-0.0356682	-0.974675	-0.985374	0.215276	-0.245363	-0.244078	-0.743107	-0.895852	-0.852174	-0.755067	-0.841923	0.827038	3.60645e-09	1.36947e-10	0.459831	0.283701	0.560205	0.0556276	0.00260818	0.00720701	0.00113636	6.18415e-06	0.999991	1.51507e-07	1.80384e-08	0.631957	0.335052	0.999965	0.18697	0.0272565	0.0417722	0.0173561	0.000258081	40	14	14	14	21	8	7	8	8	15	19	0.225168	-0.132556
C19orf70			yellow	-0.0325565	-0.730084	-0.756658	0.235378	-0.757108	-0.132826	-0.697422	-0.887461	-0.895892	-0.755027	-0.684584	0.841927	0.00303038	0.00173336	0.417899	7.08568e-05	0.753864	0.0815195	0.00326933	0.00260522	0.00113746	0.00122317	0.999991	0.0058583	0.00367326	0.594164	0.000187523	0.999965	0.238983	0.0307934	0.0243492	0.0173561	0.00977068	40	14	14	14	21	8	7	8	8	15	19	0.0260797	-0.241126
NPC1	NPC intracellular cholesterol transporter 1	coding	red	0.0227909	-0.692001	-0.471573	-0.484524	-0.547553	-0.304215	0.861284	0.799816	0.813376	0.754957	0.705982	0.888984	0.0061029	0.0887001	0.0791185	0.0101906	0.463812	0.0127558	0.0171649	0.01406	0.00113935	0.000730706	0.999991	0.0109277	0.122527	0.210577	0.0164425	0.999965	0.0982526	0.0798858	0.0621206	0.0173561	0.00676907	40	14	14	14	21	8	7	8	8	15	19	0.494471	0.35975
HIST2H2BE			pink	-0.0473118	-0.735412	-0.739764	-0.0730617	-0.749275	-0.103586	0.85908	0.793214	0.914309	0.754916	0.770239	0.771893	0.00272318	0.00249098	0.803968	9.26329e-05	0.807161	0.0132521	0.018819	0.00147371	0.00114047	0.000114357	0.999991	0.0053329	0.00502207	0.884169	0.000237306	0.999965	0.0982526	0.0842874	0.0190926	0.0173561	0.00184679	40	14	14	14	21	8	7	8	8	15	19	0.54587	0.191473
PDE5A	phosphodiesterase 5A	coding	tan	-0.00551427	0.649969	0.540435	0.292563	0.57566	-0.169809	-0.872954	-0.946506	-0.807483	-0.754823	-0.603998	0.973061	0.0118603	0.0460189	0.310085	0.00632066	0.687676	0.0103072	0.000367509	0.0153617	0.00114301	0.00616891	0.999991	0.0198562	0.0683393	0.492529	0.010651	0.999965	0.0982526	0.0106831	0.0656467	0.0173561	0.0298188	40	14	14	14	21	8	7	8	8	15	19	-0.571024	-1.05421
CBX6	chromobox 6	coding	red	-0.0628311	-0.667369	-0.526735	-0.171764	-0.535276	0.116942	0.872952	0.816159	0.760793	0.754822	0.614505	0.70012	0.00911734	0.052965	0.5571	0.0124009	0.782725	0.0103075	0.0134705	0.0283733	0.00114305	0.00511823	0.999991	0.015643	0.0773784	0.711245	0.0196552	0.999965	0.0982526	0.0689788	0.0997168	0.0173561	0.0261707	40	14	14	14	21	8	7	8	8	15	19	1.21092	0.625396
STAT6	signal transducer and activator of transcription 6	coding	blue	0.0115119	0.856005	0.813099	-0.116017	0.838586	-0.403784	0.826488	0.962772	0.934587	0.754811	0.610152	0.943795	9.36816e-05	0.000406037	0.692871	2.05575e-06	0.321172	0.0218861	0.00012541	0.000665838	0.00114335	0.00553414	0.999991	0.000300508	0.00106632	0.81175	1.02504e-05	0.999965	0.107629	0.00642028	0.0130249	0.0173561	0.0276817	40	14	14	14	21	8	7	8	8	15	19	1.77558	1.46522
GLA	galactosidase alpha	coding	darkgreen	-0.0400683	-0.461064	-0.139056	-0.481054	-0.293846	0.318438	0.844246	0.923399	0.860203	0.754544	0.440751	0.806087	0.0970493	0.635425	0.0816104	0.196052	0.442064	0.0168779	0.00106012	0.00613406	0.00115065	0.058921	0.999991	0.131447	0.688042	0.21473	0.240653	0.999965	0.0997795	0.017685	0.0381604	0.017446	0.142649	40	14	14	14	21	8	7	8	8	15	19	-0.397807	0.0263265
ST6GALNAC4	ST6 N-acetylgalactosaminide alpha-2,6-sialyltransferase 4	coding	red	-0.0035866	-0.820794	-0.744032	-0.356674	-0.749067	-0.0772552	0.803212	0.776033	0.77605	0.753892	0.64564	0.982476	0.000321157	0.00227874	0.21064	9.32815e-05	0.855722	0.0295842	0.0235797	0.0235745	0.00116865	0.00282873	0.999991	0.000849055	0.00465428	0.388896	0.000238763	0.999965	0.125031	0.0962593	0.0878314	0.0176977	0.0176116	40	14	14	14	21	8	7	8	8	15	19	0.565355	0.326102
AC037198.1			brown	-0.035711	-0.822478	-0.827378	0.511669	-0.639309	-0.380831	-0.856491	-0.930223	-0.764219	-0.753805	-0.474424	0.826834	0.000304645	0.000260469	0.0614468	0.00180697	0.351979	0.0138491	0.000805507	0.0272476	0.00117107	0.0401387	0.999991	0.000809633	0.000728678	0.180235	0.00341287	0.999965	0.0982526	0.0156846	0.0967012	0.0177132	0.10799	40	14	14	14	21	8	7	8	8	15	19	0.286621	-1.13989
MAP2K6	mitogen-activated protein kinase kinase 6	coding	grey60	-0.00675259	0.677006	-0.175067	0.88175	0.256549	0.131482	-0.709821	-0.809923	-0.898076	-0.753648	-0.818178	0.967014	0.00782574	0.549425	3.04527e-05	0.261614	0.756298	0.0739674	0.0148138	0.00244884	0.00117543	1.86502e-05	0.999991	0.0136473	0.607085	0.0097353	0.311851	0.999965	0.224476	0.0732868	0.023674	0.0177579	0.000538428	40	14	14	14	21	8	7	8	8	15	19	-0.60808	-0.230433
UBE2O	ubiquitin conjugating enzyme E2 O	coding	yellow	0.168578	-0.66314	-0.640118	0.218651	-0.653534	-0.80364	-0.82681	-0.735549	-0.849575	-0.753311	-0.290004	0.298415	0.0097336	0.0136712	0.452652	0.00131443	0.0162497	0.0217885	0.0375504	0.00757824	0.00118489	0.228445	0.999991	0.0166102	0.0229548	0.62591	0.00255983	0.929765	0.107629	0.130232	0.0427226	0.0178794	0.381193	40	14	14	14	21	8	7	8	8	15	19	0.446424	0.111333
STARD4	StAR related lipid transfer domain containing 4	coding	darkgreen	-0.00699493	-0.525024	-0.285348	-0.406574	-0.377656	0.16765	0.755265	0.843706	0.924261	0.75319	0.793841	0.965831	0.0538828	0.322715	0.149124	0.091443	0.691497	0.0496297	0.00846096	0.00102539	0.00118828	4.96457e-05	0.999991	0.0777392	0.383347	0.313182	0.120523	0.999965	0.17317	0.0527134	0.0156974	0.0179083	0.00104803	40	14	14	14	21	8	7	8	8	15	19	0.0817808	0.686326
PTP4A2	protein tyrosine phosphatase 4A2	coding	brown	0.0046828	-0.809325	0.216684	-0.870949	-0.312006	0.657327	-0.553451	-0.974476	-0.930062	-0.753142	-0.688134	0.977122	0.000453793	0.45683	5.02149e-05	0.168543	0.0765138	0.197453	4.07779e-05	0.000810992	0.00118964	0.00112624	0.999991	0.00113403	0.518408	0.00985542	0.209478	0.999965	0.419468	0.00420728	0.0144209	0.0179083	0.00919385	40	14	14	14	21	8	7	8	8	15	19	1.20005	1.34473
FGD4	FYVE, RhoGEF and PH domain containing 4	coding	yellow	-0.0145948	-0.841566	-0.923986	0.362268	-0.857175	0.165524	-0.912097	-0.915557	-0.949324	-0.753046	-0.580704	0.928778	0.000160836	2.36067e-06	0.203058	6.93968e-07	0.695265	0.00419471	0.0014116	0.000313111	0.00119236	0.00913256	0.999991	0.00047264	1.63247e-05	0.380797	4.84819e-06	0.999965	0.0982526	0.0202685	0.00956349	0.0179279	0.0390568	40	14	14	14	21	8	7	8	8	15	19	-0.147536	-0.0247799
OAS1	2'-5'-oligoadenylate synthetase 1	coding	blue	0.0126509	0.838856	0.900773	-0.395058	0.837066	-0.341765	0.815106	0.862286	0.808038	0.752847	0.80604	0.938244	0.000176964	1.10943e-05	0.162111	2.23318e-06	0.407341	0.0254878	0.00587357	0.015236	0.00119796	3.09087e-05	0.999991	0.000511827	5.54933e-05	0.330841	1.09325e-05	0.999965	0.11582	0.0425099	0.0652539	0.0179664	0.000754519	40	14	14	14	21	8	7	8	8	15	19	-0.0758918	0.267205
TXNIP	thioredoxin interacting protein	coding	blue	0.0146252	0.957992	0.94694	-0.0228742	0.904188	-0.332752	0.647963	0.938116	0.907114	0.752819	0.697403	0.928629	7.24586e-08	2.87213e-07	0.938133	1.89154e-08	0.420614	0.115529	0.000565318	0.0018665	0.00119877	0.00090301	0.999991	1.17617e-06	3.29073e-06	0.964525	1.19401e-06	0.999965	0.296985	0.013022	0.0212723	0.0179664	0.00785321	40	14	14	14	21	8	7	8	8	15	19	2.60525	2.63743
FGD5	FYVE, RhoGEF and PH domain containing 5	coding	blue	0.0278121	0.862486	0.796184	0.344247	0.811991	-0.66523	0.792123	0.960335	0.940388	0.752756	0.877708	0.864732	7.21164e-05	0.000656577	0.228111	7.84035e-06	0.0718221	0.0337137	0.000151406	0.000506207	0.00120055	7.92724e-07	0.999991	0.00024042	0.00160402	0.406585	2.87366e-05	0.999965	0.135897	0.00696376	0.0117544	0.0179664	5.93357e-05	40	14	14	14	21	8	7	8	8	15	19	1.93335	1.92718
IQGAP2	IQ motif containing GTPase activating protein 2	coding	yellow	0.00315849	-0.142981	-0.056741	-0.178017	-0.0685291	-0.28616	-0.717825	-0.865998	-0.817898	-0.752754	-0.790135	0.984568	0.625814	0.847221	0.542609	0.767874	0.492022	0.0692999	0.00542713	0.01311	0.0012006	5.69853e-05	0.999991	0.679206	0.874183	0.699418	0.80339	0.999965	0.214944	0.040776	0.0593427	0.0179664	0.00115663	40	14	14	14	21	8	7	8	8	15	19	-1.27567	-1.18763
GABPA	GA binding protein transcription factor subunit alpha	coding	blue	0.0184562	0.656607	0.681429	-0.434721	0.649569	0.0730295	0.930543	0.94055	0.865664	0.752523	0.533186	0.910003	0.0107481	0.00728264	0.120337	0.00143864	0.863556	0.0023517	0.000502154	0.00546642	0.00120719	0.0187356	0.999991	0.0181795	0.0130641	0.272943	0.0027748	0.999965	0.0982526	0.0124018	0.0360766	0.0180432	0.0640147	40	14	14	14	21	8	7	8	8	15	19	-0.147536	0.363831
B4GALT3	beta-1,4-galactosyltransferase 3	coding	red	-0.00538251	-0.798717	-0.848387	-0.0630978	-0.781523	-0.072609	0.841021	0.797993	0.791378	0.752423	0.68112	0.973704	0.000612709	0.000125448	0.83032	2.87348e-05	0.864336	0.0177328	0.0176121	0.0192961	0.00121005	0.00132439	0.999991	0.00146697	0.000396971	0.901081	8.54542e-05	0.999965	0.101101	0.0811312	0.0765129	0.0180432	0.0103632	40	14	14	14	21	8	7	8	8	15	19	0.139276	0.326102
CPTP	ceramide-1-phosphate transfer protein	coding	yellow	-0.00464874	-0.912598	-0.934536	0.625633	-0.880189	-0.106767	-0.89231	-0.881853	-0.881631	-0.752331	-0.428278	0.977288	5.31942e-06	9.85801e-07	0.0167086	1.43572e-07	0.801328	0.00689229	0.00376621	0.00378688	0.00121268	0.0673409	0.999991	2.94277e-05	8.26622e-06	0.0850158	1.96028e-06	0.999965	0.0982526	0.0330491	0.0295543	0.0180432	0.157253	40	14	14	14	21	8	7	8	8	15	19	-0.196631	-0.132556
OXR1	oxidation resistance 1	coding	blue	0.0191765	0.837689	0.803199	0.109946	0.862486	0.392271	0.823226	0.865201	0.852166	0.752328	0.805422	0.906505	0.000184302	0.000540871	0.708284	4.94784e-07	0.33646	0.0228866	0.00552115	0.00720813	0.00121277	3.16853e-05	0.999991	0.000528819	0.00135943	0.82258	3.94735e-06	0.999965	0.110145	0.0411516	0.0417722	0.0180432	0.00076608	40	14	14	14	21	8	7	8	8	15	19	0.157375	0.557822
GJC2	gap junction protein gamma 2	coding	blue	0.00592566	0.897049	0.942809	-0.235096	0.874988	-0.688024	0.875011	0.901025	0.947876	0.752324	0.864197	0.971052	1.3724e-05	4.46317e-07	0.418475	2.10491e-07	0.0592572	0.00990646	0.00224752	0.000340341	0.00121287	1.84145e-06	0.999991	6.18901e-05	4.54775e-06	0.594513	2.40005e-06	0.999965	0.0982526	0.0253976	0.00980864	0.0180432	0.000113586	40	14	14	14	21	8	7	8	8	15	19	-1.13422	-0.321639
G6PD	glucose-6-phosphate dehydrogenase	coding	red	-0.0397811	-0.868744	-0.863068	-0.0650585	-0.858361	-0.109771	0.886156	0.894514	0.756937	0.7522	0.527361	0.807451	5.53118e-05	7.03952e-05	0.825121	6.4421e-07	0.795828	0.00789248	0.0027072	0.0296738	0.00121642	0.0203231	0.999991	0.000193049	0.000246033	0.897905	4.68163e-06	0.999965	0.0982526	0.0277658	0.102757	0.0180748	0.0676278	40	14	14	14	21	8	7	8	8	15	19	0.430906	0.0735405
ISCU	iron-sulfur cluster assembly enzyme	coding	blue	0.00396206	0.744061	0.687104	0.375832	0.681431	0.0607847	0.763884	0.907237	0.935915	0.751494	0.880487	0.980642	0.00227733	0.00662924	0.185401	0.000670471	0.886309	0.0456036	0.00185928	0.000626764	0.00123683	6.58441e-07	0.999991	0.00454854	0.0120147	0.358854	0.00139008	0.999965	0.164395	0.0232779	0.0126402	0.0183565	5.30318e-05	40	14	14	14	21	8	7	8	8	15	19	0.626427	0.683904
PTMS	parathymosin	coding	blue	-0.00674435	0.158829	-0.0738326	0.364055	0.0787931	-0.492364	0.873564	0.970428	0.888018	0.751405	0.679446	0.967054	0.587585	0.801937	0.200674	0.734238	0.215166	0.0101874	6.32253e-05	0.0032224	0.00123941	0.00137576	0.999991	0.644184	0.835847	0.378228	0.773445	0.999965	0.0982526	0.00473757	0.0272374	0.0183733	0.0106271	40	14	14	14	21	8	7	8	8	15	19	1.21092	1.28874
PLCD4	phospholipase C delta 4	coding	blue	0.0288393	0.854917	0.855702	-0.185473	0.882086	0.523826	0.882368	0.932631	0.772329	0.751341	0.538064	0.859784	9.77682e-05	9.48037e-05	0.525545	1.2432e-07	0.182704	0.00854749	0.000726308	0.0246945	0.00124128	0.0174833	0.999991	0.000310779	0.000315223	0.685458	1.81109e-06	0.999965	0.0982526	0.0147418	0.0905071	0.0183793	0.0612061	40	14	14	14	21	8	7	8	8	15	19	-0.186514	0.0121493
AC007743.1			yellow	0.00961115	-0.542767	-0.811865	0.24048	-0.630073	0.0383649	-0.821189	-0.870127	-0.926386	-0.751291	-0.733751	0.953064	0.0449068	0.000421183	0.40758	0.00220353	0.928136	0.0235242	0.00495681	0.000943024	0.00124275	0.000349292	0.999991	0.065975	0.00109948	0.584867	0.00408318	0.999965	0.111369	0.0383666	0.0151	0.0183796	0.00395771	40	14	14	14	21	8	7	8	8	15	19	-0.781558	-1.05421
NXT2	nuclear transport factor 2 like export factor 2	coding	darkgreen	-0.0120766	-0.300094	-0.281847	-0.058046	-0.273093	0.376057	0.832571	0.85352	0.783551	0.751143	0.550815	0.941043	0.297209	0.328947	0.843747	0.231006	0.35855	0.0200872	0.00701946	0.0214144	0.00124706	0.0145219	0.999991	0.354261	0.389798	0.908169	0.279047	0.999965	0.104524	0.0472385	0.0823805	0.0184219	0.0536144	40	14	14	14	21	8	7	8	8	15	19	-1.09311	-0.796096
EIF3I	eukaryotic translation initiation factor 3 subunit I	coding	red	-0.0435959	-0.814596	-0.761121	-0.540874	-0.740899	-0.0917936	0.826201	0.764121	0.772498	0.751006	0.582664	0.789386	0.00038825	0.00156759	0.0458079	0.000122096	0.828851	0.0219731	0.0272797	0.024643	0.00125109	0.00884571	0.999991	0.000996028	0.00337744	0.151198	0.000303108	0.999965	0.107652	0.105943	0.0903871	0.0184598	0.0384642	40	14	14	14	21	8	7	8	8	15	19	1.14543	1.06128
RETREG3	reticulophagy regulator family member 3	coding	grey60	-7.60431e-05	0.662774	0.554707	0.73771	0.465215	-0.661312	-0.910399	-0.759056	-0.959228	-0.75063	-0.782156	0.999628	0.00978836	0.0395162	0.00259853	0.033578	0.0741262	0.00439611	0.0289547	0.000164301	0.00126217	7.5992e-05	0.999991	0.0166901	0.0595569	0.0307375	0.0486139	0.999965	0.0982526	0.110071	0.00742021	0.0185672	0.00142449	40	14	14	14	21	8	7	8	8	15	19	0.758118	0.461469
TMEM9	transmembrane protein 9	coding	tan	0.0116881	0.520496	0.0424033	0.62755	0.30525	-0.326224	-0.877117	-0.900159	-0.728314	-0.75063	-0.533543	0.942936	0.0563674	0.885556	0.0162796	0.178446	0.430341	0.00950552	0.00230548	0.0404746	0.00126218	0.0186414	0.999991	0.0808583	0.906636	0.0835212	0.220767	0.999965	0.0982526	0.0256921	0.126496	0.0185672	0.0637944	40	14	14	14	21	8	7	8	8	15	19	0.208864	0.238012
PQBP1	polyglutamine binding protein 1	coding	red	-0.00491214	-0.731899	-0.680837	-0.0936658	-0.709618	0.359579	0.641606	0.954928	0.727204	0.750562	0.629288	0.976002	0.00292284	0.00735353	0.750112	0.000314779	0.38165	0.120349	0.000221234	0.0409351	0.00126416	0.00389221	0.999991	0.00568342	0.0131782	0.849089	0.000706367	0.999965	0.303886	0.00847729	0.127546	0.0185672	0.0217102	40	14	14	14	21	8	7	8	8	15	19	0.26171	0.212589
EVA1C	eva-1 homolog C	coding	blue	0.0112244	0.79371	0.881445	-0.617252	0.86292	-0.0546615	0.864154	0.819417	0.795524	0.75056	0.690597	0.945196	0.000701825	3.09063e-05	0.0186859	4.80983e-07	0.897714	0.0121258	0.0128002	0.0182293	0.00126424	0.00106285	0.999991	0.00164809	0.000125703	0.0906688	3.88176e-06	0.999965	0.0982526	0.0671614	0.0735042	0.0185672	0.00883032	40	14	14	14	21	8	7	8	8	15	19	0.657746	0.782453
FBN1	fibrillin 1	coding	blue	0.0232081	0.963364	0.948268	0.340659	0.894164	-0.373376	0.808688	0.88771	0.837459	0.750304	0.808941	0.886965	3.22554e-08	2.47414e-07	0.233316	4.67607e-08	0.362264	0.0276557	0.00324826	0.00946955	0.00127182	2.74824e-05	0.999991	6.61457e-07	2.95704e-06	0.412801	1.37065e-06	0.999965	0.120378	0.0306982	0.048398	0.0186569	0.000700634	40	14	14	14	21	8	7	8	8	15	19	2.57252	2.0325
DEXI	Dexi homolog	coding	brown	-0.0336654	-0.821259	-0.870693	0.257769	-0.862238	0.415136	-0.868432	-0.812007	-0.765888	-0.750238	-0.484801	0.836615	0.000316526	5.0785e-05	0.373609	5.02806e-07	0.306426	0.0112205	0.014356	0.0267096	0.00127378	0.0354016	0.999991	0.000838391	0.000187096	0.552225	3.9912e-06	0.999965	0.0982526	0.0719222	0.0954344	0.018663	0.09928	40	14	14	14	21	8	7	8	8	15	19	-0.983257	-1.01543
CCNJL	cyclin J like	coding	cyan	-0.0242203	-0.423747	-0.727621	0.687041	-0.578828	-0.317656	-0.843957	-0.849025	-0.820801	-0.750162	-0.426854	0.882069	0.131068	0.00318132	0.0066362	0.00597365	0.443248	0.0169534	0.00765832	0.0125219	0.00127606	0.0683564	0.999991	0.172104	0.00622337	0.0512926	0.0101117	0.999965	0.0997795	0.0497378	0.057599	0.018663	0.15892	40	14	14	14	21	8	7	8	8	15	19	-0.28371	-0.911822
TXNDC5	thioredoxin domain containing 5	coding	grey	0.002928	0.322319	0.0517039	0.267059	0.176178	-0.187648	-0.816312	-0.876187	-0.809016	-0.750142	-0.665947	0.985694	0.261058	0.860658	0.356006	0.444915	0.656331	0.0250913	0.00431528	0.015016	0.00127667	0.00185409	0.999991	0.315953	0.886095	0.5363	0.500976	0.999965	0.11504	0.035344	0.0646501	0.018663	0.0131039	40	14	14	14	21	8	7	8	8	15	19	0.529179	0.0332954
AC027031.2			red	-0.00139296	-0.704288	-0.499154	-0.48985	-0.568814	0.453298	0.860062	0.974124	0.827672	0.749973	0.695264	0.993194	0.00492489	0.0692001	0.0753984	0.00712749	0.259318	0.0130298	4.24764e-05	0.0111975	0.0012817	0.00095091	0.999991	0.00900843	0.0980761	0.20425	0.0118823	0.999965	0.0982526	0.00429691	0.0537354	0.0187149	0.00814651	40	14	14	14	21	8	7	8	8	15	19	-1.45613	-1.29577
PDLIM2	PDZ and LIM domain 2	coding	yellow	0.000788256	-0.406009	-0.717967	0.554958	-0.522945	-0.22558	-0.853371	-0.928133	-0.787228	-0.749726	-0.587418	0.996148	0.149744	0.00383093	0.0394083	0.0149977	0.591167	0.0145883	0.000878663	0.020402	0.00128911	0.00818002	0.999991	0.193512	0.00736427	0.137771	0.023321	0.999965	0.0982526	0.0161963	0.0795264	0.0187875	0.0364726	40	14	14	14	21	8	7	8	8	15	19	-0.370687	-0.346702
WDSUB1	WD repeat, sterile alpha motif and U-box domain containing 1	coding	blue	0.0282206	0.808064	0.598991	0.260616	0.66782	0.189351	0.821828	0.80893	0.830201	0.749709	0.739546	0.862764	0.000470728	0.0236031	0.368166	0.000939163	0.653363	0.0233231	0.0150353	0.0107332	0.00128964	0.000296088	0.999991	0.00116988	0.037387	0.546865	0.00188683	0.999965	0.111081	0.0739485	0.0525158	0.0187875	0.00353544	40	14	14	14	21	8	7	8	8	15	19	-1.17807	-0.634387
CENPO	centromere protein O	coding	turquoise	-0.0856622	-0.990704	-0.985831	-0.646675	-0.85087	-0.080625	-0.859422	-0.861022	-0.919267	-0.749459	-0.834829	0.599191	9.13234e-12	1.13334e-10	0.0124441	1.01938e-06	0.849482	0.0131744	0.00603075	0.00123715	0.00129717	8.75491e-06	0.999991	5.06887e-09	1.55772e-08	0.071819	6.20386e-06	0.999965	0.0982526	0.0430598	0.0173434	0.0188755	0.000323701	40	14	14	14	21	8	7	8	8	15	19	-1.52927	-1.50446
CDK5R1	cyclin dependent kinase 5 regulatory subunit 1	coding	yellow	-0.0476129	-0.826695	-0.833202	-0.124266	-0.599191	0.526378	-0.842837	-0.710281	-0.876278	-0.749407	-0.562923	0.77048	0.000266295	0.000214842	0.672107	0.00409887	0.180194	0.0172483	0.0483507	0.00430615	0.00129875	0.0120952	0.999991	0.000722009	0.000621522	0.797634	0.00718965	0.999965	0.100232	0.152361	0.0314747	0.0188767	0.0472778	40	14	14	14	21	8	7	8	8	15	19	-2.66991	-2.18585
LIMK1	LIM domain kinase 1	coding	yellow	-0.0833461	-0.910213	-0.931651	0.466919	-0.867352	-0.0958221	-0.902284	-0.867767	-0.956857	-0.749332	-0.924312	0.609139	6.21892e-06	1.26881e-06	0.0923326	3.58418e-07	0.82143	0.00543556	0.00522235	0.000194314	0.00130102	1.58046e-08	0.999991	3.3083e-05	9.94674e-06	0.232163	3.25122e-06	0.999965	0.0982526	0.0397811	0.00766425	0.0188879	3.12264e-06	40	14	14	14	21	8	7	8	8	15	19	0.286621	-0.372821
RASA3	RAS p21 protein activator 3	coding	yellow	-0.0160908	-0.909551	-0.937379	0.662702	-0.883327	-0.344477	-0.883231	-0.974944	-0.963867	-0.749204	-0.638157	0.921498	6.48946e-06	7.59999e-07	0.0097993	1.13002e-07	0.403382	0.00839552	3.85907e-05	0.000114769	0.00130491	0.00328082	0.999991	3.41345e-05	6.79646e-06	0.0634866	1.77504e-06	0.999965	0.0982526	0.00413542	0.00620195	0.0189201	0.019477	40	14	14	14	21	8	7	8	8	15	19	0.76524	0.548833
CMAHP	cytidine monophospho-N-acetylneuraminic acid hydroxylase, pseudogene	noncoding	blue	0.0146318	0.937047	0.988631	-0.300376	0.801191	-0.0584579	0.898839	0.793198	0.73829	0.749118	0.474702	0.928597	7.83915e-07	3.04261e-11	0.296732	1.27397e-05	0.890641	0.00591607	0.0188233	0.036477	0.00130752	0.0400054	0.999991	6.53004e-06	7.12478e-09	0.479083	4.30502e-05	0.999965	0.0982526	0.0842874	0.117997	0.0189201	0.107746	40	14	14	14	21	8	7	8	8	15	19	1.231	1.65279
AC010457.1			yellow	-0.0382399	-0.803705	-0.745068	0.0619774	-0.724229	-0.147908	-0.788656	-0.749205	-0.860759	-0.749111	-0.657273	0.814778	0.000533211	0.00222941	0.833294	0.000205421	0.726691	0.035067	0.0323907	0.00606381	0.00130772	0.00222897	0.999991	0.00130138	0.00456458	0.902296	0.000482098	0.999965	0.139089	0.118493	0.0379026	0.0189201	0.0148579	40	14	14	14	21	8	7	8	8	15	19	-2.11274	-3.18406
ITGA1	integrin subunit alpha 1	coding	blue	0.0335508	0.984256	0.976711	0.388794	0.725006	-0.215662	0.848742	0.953265	0.960256	0.74898	0.957902	0.837164	2.12583e-10	2.19074e-09	0.169476	0.000200661	0.607998	0.0157261	0.000246334	0.000152308	0.00131171	1.21188e-10	0.999991	2.66149e-08	1.06944e-07	0.339802	0.000472155	0.999965	0.0984887	0.00887435	0.00711689	0.0189561	1.70268e-07	40	14	14	14	21	8	7	8	8	15	19	1.02989	0.617341
TRMT13	tRNA methyltransferase 13 homolog	coding	darkgreen	0.0126497	-0.151985	0.197255	-0.329233	0.0251814	0.730509	0.683469	0.904607	0.852142	0.748781	0.581759	0.93825	0.60398	0.49908	0.250377	0.913721	0.039573	0.0904854	0.00201783	0.00721152	0.0013178	0.00897724	0.999991	0.658788	0.559871	0.431278	0.928181	0.999965	0.255515	0.0241395	0.0417726	0.0190223	0.0387716	40	14	14	14	21	8	7	8	8	15	19	-0.757201	-0.334044
GCAT	glycine C-acetyltransferase	coding	yellow	-0.0107253	-0.697099	-0.805152	0.625663	-0.702591	-0.390474	-0.893751	-0.761522	-0.839152	-0.748547	-0.633525	0.94763	0.00559008	0.000511768	0.0167019	0.000383095	0.338876	0.00666947	0.0281315	0.00918892	0.00132498	0.00358935	0.999991	0.0100981	0.00129842	0.0850158	0.000841159	0.999965	0.0982526	0.108123	0.0476204	0.0191042	0.0206776	40	14	14	14	21	8	7	8	8	15	19	-0.344641	-0.523003
TSPAN4	tetraspanin 4	coding	brown	-0.0221179	-0.417304	-0.308239	-0.15163	-0.357225	-0.306998	-0.874892	-0.979538	-0.766125	-0.748421	-0.521975	0.892243	0.137661	0.283639	0.604834	0.111893	0.459524	0.00992925	2.10907e-05	0.0266338	0.00132884	0.021884	0.999991	0.179752	0.342496	0.748569	0.144968	0.999965	0.0982526	0.00364605	0.0952446	0.019138	0.0711693	40	14	14	14	21	8	7	8	8	15	19	0.446424	0.778297
PRKAB2	protein kinase AMP-activated non-catalytic subunit beta 2	coding	blue	0.0127181	0.732109	0.613785	0.346548	0.663959	0.793931	0.826716	0.841951	0.74987	0.74819	0.580346	0.937917	0.00291059	0.0195535	0.22481	0.00103027	0.0186347	0.0218169	0.00873694	0.0321511	0.00133599	0.00918589	0.999991	0.00566135	0.031598	0.403497	0.00205193	0.93831	0.107629	0.0537609	0.108311	0.0192191	0.0392153	40	14	14	14	21	8	7	8	8	15	19	0.305892	-0.0973567
P4HB	prolyl 4-hydroxylase subunit beta	coding	yellow	-0.0540793	-0.824503	-0.814628	0.0154138	-0.584992	-0.341391	-0.687232	-0.913943	-0.835179	-0.748068	-0.605741	0.740324	0.000285709	0.000387872	0.958291	0.00534348	0.407889	0.0880188	0.00149222	0.00985566	0.00133977	0.00598343	0.999991	0.000766133	0.00102457	0.977225	0.00912715	0.999965	0.250845	0.0208039	0.0495203	0.0192516	0.0292028	40	14	14	14	21	8	7	8	8	15	19	1.87225	1.74443
RNF216P1	ring finger protein 216 pseudogene 1	noncoding	yellow	-0.0369336	-0.695003	-0.708858	-0.0882998	-0.687613	0.00225188	-0.765438	-0.885165	-0.797782	-0.747939	-0.614251	0.821	0.0057967	0.00453531	0.764047	0.000572012	0.995778	0.0448977	0.0034673	0.0176642	0.00134377	0.00514181	0.999991	0.0104326	0.00857363	0.857822	0.00120511	0.999965	0.162657	0.031748	0.071775	0.0192725	0.0262487	40	14	14	14	21	8	7	8	8	15	19	-0.319587	-0.721579
RFX3	regulatory factor X3	coding	blue	0.0173062	0.761709	0.736493	0.203694	0.750556	0.30431	0.725611	0.880614	0.815105	0.747923	0.678385	0.915589	0.00154673	0.002664	0.484882	8.87174e-05	0.463666	0.0649163	0.00388218	0.0136919	0.00134427	0.00140915	0.999991	0.00326028	0.00533094	0.651853	0.000228712	0.999965	0.205848	0.0333672	0.0611704	0.0192725	0.0108266	40	14	14	14	21	8	7	8	8	15	19	-0.0930843	-0.123567
AP5B1	adaptor related protein complex 5 subunit beta 1	coding	yellow	-0.0798463	-0.498333	-0.585113	0.497247	-0.187335	-0.364714	-0.89456	-0.728442	-0.845796	-0.747845	-0.477828	0.624302	0.0697317	0.0279463	0.0704397	0.416135	0.374382	0.00654618	0.0404214	0.00813952	0.0013467	0.0385338	0.999991	0.0978535	0.0436326	0.195803	0.471657	0.999965	0.0982526	0.136394	0.0444213	0.0192822	0.1049	40	14	14	14	21	8	7	8	8	15	19	0.0949989	-0.169875
RUSC1	RUN and SH3 domain containing 1	coding	steelblue	-0.00550566	-0.11585	0.226171	-0.674866	0.0748924	-0.222904	0.87486	0.965044	0.915193	0.747793	0.448761	0.973103	0.693294	0.436856	0.00809941	0.746969	0.595692	0.00993558	0.000104001	0.00142955	0.00134832	0.0539483	0.999991	0.740681	0.49838	0.0569378	0.785284	0.999965	0.0982526	0.00564416	0.0187517	0.0192822	0.133551	40	14	14	14	21	8	7	8	8	15	19	0.465321	0.545807
CTSZ	cathepsin Z	coding	tan	0.0156775	0.529324	0.782946	-0.724785	0.640725	0.0148362	-0.811374	-0.95344	-0.930297	-0.747754	-0.885242	0.923509	0.0515973	0.000928655	0.00336237	0.00175184	0.972186	0.0267363	0.000243614	0.000802997	0.00134953	4.74177e-07	0.999991	0.0747877	0.00216298	0.0354014	0.00331766	0.999965	0.118368	0.00885094	0.0143724	0.0192822	4.19299e-05	40	14	14	14	21	8	7	8	8	15	19	1.38937	1.53053
CAMKK1	calcium/calmodulin dependent protein kinase kinase 1	coding	blue	0.0265267	0.923771	0.913985	0.153576	0.798309	0.00253233	0.849738	0.924989	0.85111	0.747638	0.48684	0.870929	2.39996e-06	4.84725e-06	0.600153	1.44308e-05	0.995252	0.0154772	0.000996665	0.00735757	0.00135314	0.0345238	0.999991	1.59002e-05	2.88033e-05	0.744637	4.78566e-05	0.999965	0.0984578	0.0171234	0.0421225	0.0193121	0.0974886	40	14	14	14	21	8	7	8	8	15	19	0.758118	0.295085
SMS	spermine synthase	coding	yellow	-0.0650649	-0.986657	-0.986048	-0.340155	-0.357147	0.116575	-0.776221	-0.850938	-0.965262	-0.747271	-0.88	0.689981	7.91699e-11	1.03361e-10	0.234054	0.111976	0.783393	0.0401651	0.00738212	0.000102089	0.00136467	6.80436e-07	0.999991	1.41715e-08	1.46854e-08	0.413527	0.145046	0.999965	0.151292	0.0488216	0.0060323	0.0194546	5.43387e-05	40	14	14	14	21	8	7	8	8	15	19	-0.426094	-0.386305
ARFGAP1	ADP ribosylation factor GTPase activating protein 1	coding	yellow	-0.0124599	-0.73277	-0.867018	0.394857	-0.782503	-0.137901	-0.887391	-0.927189	-0.814231	-0.747148	-0.534348	0.939175	0.0028723	5.95889e-05	0.162343	2.76475e-05	0.744695	0.00768555	0.000913071	0.0138772	0.00136854	0.018431	0.999991	0.00559893	0.000214354	0.330976	8.2696e-05	0.999965	0.0982526	0.016447	0.0616684	0.0194879	0.0633488	40	14	14	14	21	8	7	8	8	15	19	0.903179	0.661662
GRAP	GRB2 related adaptor protein	coding	salmon	-0.00592327	-0.690293	-0.892242	0.593726	-0.755526	0.174847	-0.78638	-0.803277	-0.846082	-0.747008	-0.662379	0.971064	0.00628262	1.78542e-05	0.0251865	7.48559e-05	0.678783	0.0359714	0.0163353	0.00809615	0.00137299	0.00200136	0.999991	0.0112019	8.07462e-05	0.106283	0.000196616	0.999965	0.141055	0.0775376	0.044322	0.0195121	0.0138215	40	14	14	14	21	8	7	8	8	15	19	-2.334	-1.69682
SULT1C4	sulfotransferase family 1C member 4	coding	grey60	0.00549513	0.833185	0.614906	0.547617	0.657592	0.0333361	-0.833376	-0.83234	-0.934983	-0.746997	-0.611812	0.973154	0.00021497	0.0192697	0.0426561	0.00119681	0.937541	0.0198558	0.0103505	0.000654018	0.00137333	0.00537235	0.999991	0.000601459	0.0311832	0.145293	0.00234704	0.999965	0.104149	0.0594916	0.0129422	0.0195121	0.0271534	40	14	14	14	21	8	7	8	8	15	19	-0.12888	0.169613
ITPR3	inositol 1,4,5-trisphosphate receptor type 3	coding	red	-0.0230189	-0.679558	-0.690383	-0.0550671	-0.698667	-0.238685	0.879791	0.81379	0.876417	0.746846	0.584449	0.887881	0.00750873	0.00627306	0.851682	0.000426479	0.569172	0.00901037	0.0139714	0.00429205	0.00137813	0.00859087	0.999991	0.0131561	0.0114463	0.912879	0.000925014	0.999965	0.0982526	0.0706477	0.0314478	0.0195583	0.0377586	40	14	14	14	21	8	7	8	8	15	19	1.5669	0.937404
TXNDC11	thioredoxin domain containing 11	coding	brown	0.00828972	-0.569796	-0.372455	-0.574668	-0.433267	-0.939455	-0.907121	-0.948748	-0.84768	-0.746754	-0.693128	0.959511	0.0334041	0.189701	0.0315893	0.0497596	0.000529951	0.0048005	0.000323767	0.00785656	0.00138103	0.00100084	0.999991	0.0505983	0.24118	0.121412	0.0695142	0.279218	0.0982526	0.00986751	0.0435729	0.0195775	0.00844272	40	14	14	14	21	8	7	8	8	15	19	0.364886	0.475214
STAG2	stromal antigen 2	coding	blue	-0.0506241	0.0808399	0.178324	-0.050229	0.14644	0.0293678	0.677123	0.915529	0.926262	0.746627	0.842888	0.756393	0.783529	0.541902	0.864599	0.526467	0.944967	0.0947271	0.00141299	0.000947728	0.00138509	5.8909e-06	0.999991	0.818888	0.600346	0.919849	0.580298	0.999965	0.262011	0.0202685	0.0151	0.0196062	0.000252006	40	14	14	14	21	8	7	8	8	15	19	0.668775	1.06785
HLTF	helicase like transcription factor	coding	yellow	0.00605089	0.0274267	-0.294201	0.340498	-0.104628	-0.0448892	-0.750001	-0.954696	-0.936003	-0.746521	-0.819643	0.97044	0.925848	0.307257	0.233551	0.651737	0.915946	0.0521808	0.000224629	0.000624208	0.00138846	1.75038e-05	0.999991	0.939218	0.367193	0.413037	0.699178	0.999965	0.179496	0.00848742	0.0126402	0.0196062	0.000513732	40	14	14	14	21	8	7	8	8	15	19	0.225168	0.247896
SLC3A2	solute carrier family 3 member 2	coding	blue	-0.0226308	0.14323	0.537991	-0.455746	0.333911	0.722632	0.903638	0.849062	0.797261	0.746499	0.35027	0.889759	0.625208	0.0472065	0.101475	0.139055	0.0428651	0.00525321	0.00765298	0.0177938	0.00138915	0.141511	0.999991	0.678839	0.0698487	0.245815	0.176258	0.999965	0.0982526	0.0497286	0.0721624	0.0196062	0.270875	40	14	14	14	21	8	7	8	8	15	19	1.13743	1.31911
SLC25A32	solute carrier family 25 member 32	coding	brown	-0.00787451	-0.738647	-0.464933	-0.538074	-0.575382	-0.21104	-0.754214	-0.950737	-0.882784	-0.746478	-0.702047	0.961538	0.00254903	0.0939144	0.047166	0.00635188	0.615892	0.0501338	0.00028795	0.00368063	0.00138983	0.000805953	0.999991	0.00502768	0.128927	0.154083	0.0106972	0.999965	0.174304	0.00952663	0.0290159	0.0196062	0.00723298	40	14	14	14	21	8	7	8	8	15	19	-0.00364628	0.600911
PRDX5	peroxiredoxin 5	coding	yellow	-0.0299115	-0.614205	-0.78363	0.766758	-0.670106	-0.290082	-0.829586	-0.971802	-0.749972	-0.746438	-0.567255	0.854626	0.0194469	0.000912684	0.00137652	0.000888527	0.485839	0.0209592	5.48758e-05	0.0321144	0.0013911	0.0113107	0.999991	0.0309666	0.00213049	0.023085	0.00179451	0.999965	0.105842	0.00464352	0.108232	0.0196062	0.0451466	40	14	14	14	21	8	7	8	8	15	19	0.571724	0.375913
NADK	NAD kinase	coding	blue	0.0179243	0.757173	0.841892	0.0400669	0.765081	-0.585785	0.881165	0.74635	0.900976	0.746399	0.719535	0.912586	0.00171353	0.000158976	0.891827	5.33905e-05	0.127049	0.00876172	0.033431	0.00225082	0.00139236	0.000515109	0.999991	0.00355498	0.000483466	0.935922	0.000146511	0.999965	0.0982526	0.121023	0.022813	0.0196062	0.00531285	40	14	14	14	21	8	7	8	8	15	19	0.863732	0.845414
ARCN1	archain 1	coding	brown	0.0041319	-0.942774	-0.92752	-0.815398	-0.833771	0.122619	-0.932123	-0.892661	-0.748565	-0.746035	-0.490193	0.979813	4.47905e-07	1.78809e-06	0.000378984	2.66448e-06	0.772383	0.00222217	0.00284824	0.0326221	0.00140403	0.0331173	0.999991	4.34004e-06	1.31227e-05	0.0154092	1.2396e-05	0.999965	0.0982526	0.0285894	0.109331	0.0197424	0.0947869	40	14	14	14	21	8	7	8	8	15	19	1.36517	1.41727
IRF9	interferon regulatory factor 9	coding	blue	0.00365242	0.824327	0.756583	0.27524	0.768593	0.518041	0.562594	0.855796	0.883489	0.746001	0.644748	0.982155	0.000287322	0.00173623	0.34089	4.69692e-05	0.188463	0.188584	0.00670936	0.00361657	0.00140515	0.00287975	0.999991	0.000769743	0.00367749	0.522254	0.000131516	0.999965	0.40875	0.0460651	0.0287439	0.0197424	0.0178404	40	14	14	14	21	8	7	8	8	15	19	-0.571024	-0.474012
PELP1	proline, glutamate and leucine rich protein 1	coding	brown	-0.0561043	-0.839907	-0.806113	-0.196584	-0.85228	-0.619558	-0.872827	-0.810293	-0.824435	-0.745839	-0.24353	0.730956	0.000170558	0.000497927	0.500569	9.36834e-07	0.101369	0.0103322	0.0147319	0.0118099	0.00141038	0.315046	0.999991	0.000496022	0.00126884	0.665033	5.89367e-06	0.999965	0.0982526	0.0729382	0.0554328	0.019779	0.476933	40	14	14	14	21	8	7	8	8	15	19	0.668775	0.399395
PEPD	peptidase D	coding	lightcyan	0.0211423	-0.0854373	-0.624269	0.628693	-0.33428	-0.442593	0.652174	0.818559	0.900081	0.745803	0.764311	0.89697	0.771508	0.0170191	0.0160279	0.138592	0.272143	0.112393	0.0129747	0.00231075	0.00141154	0.000138913	0.999991	0.808798	0.0278909	0.0827914	0.175759	0.999965	0.29153	0.0677113	0.0229731	0.019779	0.00211124	40	14	14	14	21	8	7	8	8	15	19	0.539245	0.355643
ACKR4	atypical chemokine receptor 4	coding	blue	0.0132308	0.887959	0.948339	-0.455875	0.877349	0.434125	0.735782	0.802763	0.811369	0.745736	0.625605	0.935419	2.2343e-05	2.45403e-07	0.101366	1.77314e-07	0.282505	0.059422	0.0164569	0.0144952	0.00141371	0.00417225	0.999991	9.19086e-05	2.94041e-06	0.245645	2.2024e-06	0.999965	0.194661	0.0779098	0.0632912	0.019779	0.022721	40	14	14	14	21	8	7	8	8	15	19	0.208864	0.566682
CEP97	centrosomal protein 97	coding	grey	-0.00314127	0.0233458	0.272799	-0.336345	0.134063	0.86229	0.640303	0.88308	0.895071	0.745698	0.586675	0.984652	0.93686	0.345362	0.239672	0.562345	0.00587316	0.121349	0.00365364	0.00266568	0.00141495	0.00828139	0.999991	0.948486	0.406734	0.419758	0.614488	0.632621	0.305365	0.0324268	0.024658	0.019779	0.0368078	40	14	14	14	21	8	7	8	8	15	19	-0.0844319	0.111333
TRMT1L	tRNA methyltransferase 1 like	coding	grey	-0.00495282	-0.163428	0.0271756	-0.482656	-0.0522965	0.442901	0.84105	0.8791	0.72474	0.745678	0.537495	0.975803	0.57667	0.926525	0.0804533	0.821877	0.271769	0.017725	0.00402703	0.0419684	0.00141558	0.0176257	0.999991	0.633811	0.940584	0.212875	0.850809	0.999965	0.101101	0.034048	0.129658	0.019779	0.0614643	40	14	14	14	21	8	7	8	8	15	19	-0.370687	0.0927243
TMSB4XP8	TMSB4X pseudogene 8		orange	0.0507352	0.114256	-0.390067	0.462493	-0.140232	0.273504	-0.871961	-0.929395	-0.806595	-0.745616	-0.520487	0.755874	0.697332	0.167962	0.0958831	0.544329	0.51218	0.0105038	0.000834002	0.015564	0.0014176	0.0223316	0.999991	0.744674	0.216281	0.237517	0.597382	0.999965	0.0982526	0.0158263	0.0661928	0.0197853	0.0720982	40	14	14	14	21	8	7	8	8	15	19	-0.60808	-0.443377
NIPA1	NIPA magnesium transporter 1	coding	brown	-0.0160086	-0.920775	-0.928866	0.279871	-0.877431	0.729962	-0.901124	-0.875006	-0.759035	-0.745472	-0.530885	0.921898	3.00447e-06	1.60251e-06	0.332494	1.76241e-07	0.0397967	0.00559479	0.00443589	0.0289617	0.00142229	0.0193504	0.999991	1.89107e-05	1.20525e-05	0.514801	2.19892e-06	0.999965	0.0982526	0.0360487	0.101194	0.01981	0.0654513	40	14	14	14	21	8	7	8	8	15	19	-0.196631	-0.346702
CCAR2	cell cycle and apoptosis regulator 2	coding	brown	-0.0156611	-0.95121	-0.934651	-0.482469	-0.871654	-0.0564916	-0.872871	-0.945006	-0.68727	-0.745465	-0.504347	0.923589	1.75236e-07	9.75698e-07	0.0805878	2.6665e-07	0.894303	0.0103236	0.000398846	0.05965	0.0014225	0.0276641	0.999991	2.20923e-06	8.20872e-06	0.213053	2.72116e-06	0.999965	0.0982526	0.0110118	0.163334	0.01981	0.0835872	40	14	14	14	21	8	7	8	8	15	19	0.738741	0.654067
NT5DC1	5'-nucleotidase domain containing 1	coding	blue	0.0395424	0.723219	0.845916	-0.304742	0.816788	0.512459	0.832028	0.92304	0.719369	0.745201	0.578281	0.808584	0.00346579	0.000137449	0.289419	6.25714e-06	0.19411	0.0202444	0.00107481	0.0442754	0.00143113	0.00949769	0.999991	0.00659219	0.000429253	0.471186	2.39248e-05	0.999965	0.104711	0.0177392	0.134324	0.019875	0.0401666	40	14	14	14	21	8	7	8	8	15	19	-0.272174	0.271939
SIDT2	SID1 transmembrane family member 2	coding	blue	0.0216856	0.918862	0.87381	0.216486	0.904756	-0.109493	0.898016	0.972697	0.78951	0.745092	0.819634	0.894337	3.45225e-06	4.41792e-05	0.457251	1.79167e-08	0.796335	0.00603446	4.98477e-05	0.0197892	0.00143469	1.75104e-05	0.999991	2.11091e-05	0.000166994	0.629405	1.19401e-06	0.999965	0.0982526	0.00464352	0.0778092	0.019875	0.000513732	40	14	14	14	21	8	7	8	8	15	19	1.0562	0.905972
SIRT5	sirtuin 5	coding	blue	0.00105641	0.912632	0.650423	0.646233	0.687267	0.58298	0.884036	0.909781	0.723323	0.745083	0.477663	0.994838	5.30747e-06	0.0117815	0.012524	0.000577166	0.129329	0.00825539	0.00171387	0.0425697	0.001435	0.0386105	0.999991	2.94097e-05	0.020132	0.0721156	0.00121458	0.999965	0.0982526	0.0222662	0.131036	0.019875	0.105018	40	14	14	14	21	8	7	8	8	15	19	-0.28371	-0.132556
RIPK2	receptor interacting serine/threonine kinase 2	coding	brown	-0.0300231	-0.755164	-0.586997	-0.577979	-0.613045	-0.247401	-0.794081	-0.813755	-0.849219	-0.745055	-0.548267	0.85409	0.00179184	0.0273243	0.0303984	0.00312693	0.554704	0.0329627	0.0139789	0.00763009	0.00143592	0.0150789	0.999991	0.00369621	0.0427459	0.118988	0.00563409	0.999965	0.134153	0.0706477	0.0427786	0.019875	0.0552726	40	14	14	14	21	8	7	8	8	15	19	-0.486604	-0.199415
OSBPL1A	oxysterol binding protein like 1A	coding	blue	0.0034163	0.833904	0.0565541	0.856071	0.424695	-0.220912	0.811604	0.9359	0.79405	0.745007	0.812093	0.983308	0.000209815	0.847719	9.34369e-05	0.0549835	0.59907	0.0266582	0.00062718	0.0186042	0.00143748	2.41334e-05	0.999991	0.000588794	0.874554	0.0113712	0.0761352	0.999965	0.118195	0.0137933	0.0745643	0.019875	0.000642457	40	14	14	14	21	8	7	8	8	15	19	-0.22795	-0.209583
ZFYVE26	zinc finger FYVE-type containing 26	coding	lightcyan	-0.0104439	-0.338787	-0.513505	0.244554	-0.413631	0.405483	0.719558	0.893352	0.837913	0.745	0.734677	0.949002	0.236061	0.0603642	0.399435	0.062335	0.318944	0.0683111	0.00279513	0.0093937	0.00143771	0.000340289	0.999991	0.289243	0.0871054	0.576844	0.0852413	0.999965	0.212967	0.028253	0.0481684	0.019875	0.00388003	40	14	14	14	21	8	7	8	8	15	19	0.760501	0.563743
SYPL1	synaptophysin like 1	coding	blue	0.0158008	0.0677672	0.362135	-0.145906	0.195929	0.151864	0.859	0.872535	0.75823	0.744986	0.484463	0.922909	0.817948	0.203237	0.618689	0.394672	0.719602	0.0132703	0.00469513	0.0292337	0.00143816	0.0355486	0.999991	0.84827	0.255817	0.758442	0.450336	0.999965	0.0982526	0.0373161	0.101751	0.019875	0.0995598	40	14	14	14	21	8	7	8	8	15	19	0.266768	0.948594
DOK5	docking protein 5	coding	blue	0.00260738	0.758252	0.942701	-0.658376	0.754612	0.165475	0.755654	0.811543	0.884543	0.744874	0.810254	0.98726	0.0016726	4.51286e-07	0.0104657	7.72543e-05	0.695352	0.0494443	0.0144572	0.00352222	0.00144185	2.60418e-05	0.999991	0.00348551	4.58474e-06	0.0653847	0.000201918	0.999965	0.172857	0.0722006	0.0283143	0.0199029	0.000678966	40	14	14	14	21	8	7	8	8	15	19	0.351734	-0.114707
NAV1	neuron navigator 1	coding	yellow	-0.0735498	-0.911885	-0.895136	0.00391687	-0.713961	-0.333388	-0.764289	-0.89959	-0.869951	-0.744791	-0.765517	0.651967	5.57622e-06	1.52616e-05	0.989397	0.000278016	0.419672	0.0454191	0.00234409	0.00497636	0.00144459	0.000133585	0.999991	3.05906e-05	7.13695e-05	0.993933	0.00063115	0.999965	0.163948	0.0258874	0.0342101	0.0199029	0.00205593	40	14	14	14	21	8	7	8	8	15	19	0.748501	-0.359624
ARFGEF2	ADP ribosylation factor guanine nucleotide exchange factor 2	coding	red	-0.0252547	-0.916115	-0.929581	0.0539895	-0.894396	0.0574752	0.750544	0.838104	0.80249	0.744781	0.567653	0.87707	4.18999e-06	1.51064e-06	0.854556	4.58374e-08	0.892471	0.0519146	0.00936199	0.0165216	0.00144491	0.0112408	0.999991	2.4563e-05	1.14633e-05	0.91397	1.35886e-06	0.999965	0.178774	0.0562352	0.0687468	0.0199029	0.0449383	40	14	14	14	21	8	7	8	8	15	19	0.929448	0.948594
BCL2L11	BCL2 like 11	coding	grey60	-0.00358516	0.791654	0.621596	0.646572	0.683161	-0.196334	-0.826686	-0.711402	-0.848741	-0.744539	-0.573659	0.982483	0.000741296	0.0176401	0.0124626	0.000641571	0.641225	0.0218261	0.0478365	0.00769994	0.0014529	0.0102267	0.999991	0.00172755	0.0288004	0.0718928	0.00133508	0.999965	0.107629	0.151678	0.0429492	0.0199912	0.0422885	40	14	14	14	21	8	7	8	8	15	19	-0.196631	-0.594994
RETREG2	reticulophagy regulator family member 2	coding	blue	0.0343587	0.58477	0.406441	0.597464	0.399853	-0.565198	0.756674	0.924777	0.984977	0.744406	0.942128	0.833297	0.0280605	0.149269	0.0240543	0.0725045	0.144315	0.0489587	0.00100499	8.38065e-06	0.00145732	1.71681e-09	0.999991	0.0431455	0.194528	0.103811	0.0977628	0.999965	0.171824	0.0171732	0.00266847	0.020004	8.95387e-07	40	14	14	14	21	8	7	8	8	15	19	0.81742	0.628058
GIMAP4	GTPase, IMAP family member 4	coding	yellow	0.00435654	-0.764945	-0.919623	0.418082	-0.788389	-0.169092	-0.809251	-0.766825	-0.908645	-0.744372	-0.759603	0.978715	0.0014358	3.26791e-06	0.136852	2.18404e-05	0.688943	0.0274615	0.0264102	0.00177784	0.00145847	0.000161497	0.999991	0.00305651	2.10616e-05	0.296853	6.77224e-05	0.999965	0.120115	0.103843	0.0208757	0.020004	0.00234135	40	14	14	14	21	8	7	8	8	15	19	0.674221	0.902569
MAGED1	MAGE family member D1	coding	skyblue	-0.0248924	0.0988452	-0.192553	0.258054	-0.0662203	-0.42741	-0.871259	-0.980074	-0.907824	-0.744368	-0.658365	0.87882	0.736729	0.509567	0.373063	0.775498	0.290856	0.0106443	1.94838e-05	0.00182508	0.00145857	0.00217861	0.999991	0.77868	0.569996	0.551611	0.810427	0.999965	0.0982526	0.00364153	0.0210748	0.020004	0.0146223	40	14	14	14	21	8	7	8	8	15	19	1.67476	1.42613
SAP18	Sin3A associated protein 18	coding	darkgreen	-0.0075449	-0.663123	0.0416418	-0.605175	-0.278782	0.557037	0.673776	0.949378	0.900363	0.744	0.741149	0.963146	0.00973617	0.887599	0.0218403	0.221044	0.151497	0.0970055	0.000312112	0.00229173	0.00147085	0.000282649	0.999991	0.0166114	0.908286	0.098809	0.268193	0.999965	0.265871	0.00978601	0.0229288	0.0201397	0.00342672	40	14	14	14	21	8	7	8	8	15	19	0.733806	0.780379
[truncated: 11,722 more rows]
[truncated: 38 more columns]

## Sheet: noncoding
symbol	genename	genetype	module	bicor.batch	bicor.cordVearly	bicor.cordVlate	bicor.lateVearly	bicor.cordVculture	bicor.flow30minVstatic	bicor.flow8hrVstatic	bicor.flow24hrVstatic	bicor.flow48hrVstatic	bicor.flowVstatic	bicor.timeUnderFlow	p.batch	p.cordVearly	p.cordVlate	p.lateVearly	p.cordVculture	p.flow30minVstatic	p.flow8hrVstatic	p.flow24hrVstatic	p.flow48hrVstatic	p.flowVstatic	p.timeUnderFlow	fdr.batch	fdr.cordVearly	fdr.cordVlate	fdr.lateVearly	fdr.cordVculture	fdr.flow30minVstatic	fdr.flow8hrVstatic	fdr.flow24hrVstatic	fdr.flow48hrVstatic	fdr.flowVstatic	fdr.timeUnderFlow	nObs.batch	nObs.cordVearly	nObs.cordVlate	nObs.lateVearly	nObs.cordVculture	nObs.flow30minVstatic	nObs.flow8hrVstatic	nObs.flow24hrVstatic	nObs.flow48hrVstatic	nObs.flowVstatic	nObs.timeUnderFlow	ya65c	ya66c
[truncated: 282 more rows]
[truncated: 38 more columns]
