# Supplementary material for: Transcriptional drifts associated with environmental changes in endothelial cells
Source: eLife. 2023 Mar 27;12:e81370. doi: 10.7554/eLife.81370 (PMC10168696; doi:10.7554/eLife.81370)
Supplement: Supplementary file 5. [file elife-81370-supp5.xlsx]

## Sheet: cord
	statistic.t	parameter.df	p.value	conf.int1	conf.int2	estimate.mean of x (why negative . . . 0.1 read / 1M read)	estimate.mean of y
PPP1R12B	36.5797	12.9615	1.8232e-14	3.90792	4.39865	5.31624	1.16296
SYNPO2	36.3637	21.9302	4.26899e-21	9.02633	10.1184	6.12986	-3.44249
FOS	33.4263	12.377	1.64947e-13	9.58572	10.9177	9.14534	-1.10636
JUNB	32.9111	15.0323	2.00173e-15	5.65362	6.43648	8.01425	1.96919
SOCS3	30.8023	13.1398	1.22202e-13	5.61554	6.46168	8.87401	2.8354
ITPR1	30.7725	15.3926	3.03134e-15	3.32723	3.82128	5.31589	1.74163
ACTA2	28.9369	12.402	9.23397e-13	7.26851	8.44762	6.98965	-0.868407
TGFB3	27.6595	8.56021	1.1297e-09	3.89377	4.59338	3.77232	-0.47126
SYTL2	26.9602	20.5298	1.66269e-17	6.07867	7.09637	3.18903	-3.39849
BMP6	26.8601	19.6116	6.14111e-17	1.81277	2.11846	7.48297	5.51735
CRISPLD2	26.3969	20.7336	1.94061e-17	7.88263	9.23202	4.47558	-4.08175
SORBS1	26.3192	18.9279	2.26896e-16	5.57466	6.53818	5.2903	-0.766116
MMP28	25.9704	21.8717	6.27353e-18	6.03064	7.07777	5.55254	-1.00167
SLC41A3	25.727	10.5118	7.79494e-11	2.27166	2.69936	5.5389	3.05339
CEBPD	24.975	20.4512	8.44443e-17	4.98522	5.89247	5.14839	-0.290454
ELN	24.5382	20.8653	7.16186e-17	9.64528	11.4323	10.7146	0.175786
FGF18	24.3152	18.9542	9.4277e-16	8.08181	9.60448	3.70365	-5.13949
FOSB	24.2257	8.37532	4.73882e-09	9.2197	11.143	7.96643	-2.2149
ZFP36	24.0636	10.5874	1.38318e-10	6.84423	8.22954	8.07694	0.540056
CXCL2	23.8009	21.6686	5.05564e-17	5.90993	7.03925	6.53112	0.056534
C6orf89	23.2072	12.1661	1.91561e-11	1.07392	1.29609	4.71391	3.5289
ID2	22.8557	17.9872	9.65899e-15	4.55456	5.4767	3.86257	-1.15306
ATF3	22.7585	18.7466	4.08853e-15	4.96114	5.96709	3.75114	-1.71297
MTURN	22.5254	21.6131	1.69944e-16	2.33418	2.80811	3.82213	1.25099
CMKLR1	22.3411	19.479	2.38621e-15	7.2404	8.73452	4.7145	-3.27296
FNIP2	22.2819	18.4184	8.90622e-15	2.54532	3.07433	4.61805	1.80823
IGFBP5	22.2707	21.7837	1.77511e-16	9.4492	11.391	5.53561	-4.88448
KLF4	22.1183	21.9258	1.7478e-16	6.99204	8.4392	6.81688	-0.898738
FBLN2	22.0102	21.8475	2.11375e-16	8.1682	9.86835	7.92002	-1.09826
LMCD1	21.9833	20.8216	6.87653e-16	3.74478	4.52777	5.017	0.880721
TEK	21.5958	18.9786	8.05213e-15	2.13996	2.59932	6.9995	4.62986
NEO1	21.4561	21.2853	6.67832e-16	4.98146	6.04978	0.519012	-4.99661
DUSP1	21.3387	13.5758	7.78198e-12	4.33895	5.31181	8.53174	3.70636
MAP3K8	21.2899	16.8991	1.21423e-13	3.51247	4.28561	3.44898	-0.450066
ITGA1	21.2493	16.3162	2.54404e-13	3.94417	4.81682	4.18555	-0.194945
IRF2BPL	21.2338	10.7675	3.91568e-10	2.01707	2.48495	4.5084	2.25739
ARID5A	21.1406	8.01403	2.57552e-08	3.0177	3.75639	5.26062	1.87358
CCDC80	20.7522	21.1788	1.47666e-15	2.89155	3.53526	5.40793	2.19452
RAMP2	20.7428	17.3198	1.13094e-13	5.16058	6.32742	5.48737	-0.256629
HAPLN3	20.6704	13.6907	1.02137e-11	3.91112	4.81889	6.3384	1.9734
NTN1	20.3409	20.1972	6.31637e-15	5.22426	6.41736	2.85018	-2.97064
AQP1	20.3199	21.7831	1.1982e-15	6.74766	8.28255	8.82677	1.31166
COL1A2	20.2845	16.3336	5.18205e-13	7.63261	9.41085	8.78534	0.263608
LYST	20.05	14.1875	8.23481e-12	3.0015	3.71957	4.70237	1.34183
PTGIS	20.0451	21.4493	2.24402e-15	7.29172	8.97744	7.7334	-0.401182
ARID5B	20.0141	21.4386	2.34185e-15	3.81372	4.69695	5.36341	1.10807
MYLIP	19.9254	21.5116	2.3778e-15	2.51018	3.09428	3.69939	0.89716
SLC8A1	19.7303	18.4305	7.57689e-14	5.46885	6.76988	4.14061	-1.97875
SRL	19.716	21.1378	4.33009e-15	4.7788	5.9053	1.86459	-3.47746
GAS1	19.6183	16.6961	5.78644e-13	4.82459	5.98915	1.64751	-3.75936
SLC22A4	19.6129	14.4765	7.84721e-12	2.67619	3.3311	2.64093	-0.362713
MMP24	19.609	20.1256	1.37947e-14	2.5092	3.10632	1.49373	-1.31403
OLFML2A	19.4459	21.8578	2.76107e-15	5.73264	7.10195	3.56819	-2.8491
RAPGEF4	19.3566	17.0137	5.02568e-13	3.06861	3.81933	3.85021	0.406238
PLCB4	19.2218	21.3616	5.75569e-15	3.87161	4.8099	3.38843	-0.952326
TRIB2	19.1679	11.5215	4.24726e-10	2.73013	3.43406	4.2439	1.16181
ADGRA2	19.0276	13.1389	5.99809e-11	2.95093	3.70592	6.87956	3.55113
KCNN3	19.0146	15.957	2.18626e-12	4.33832	5.42732	3.81763	-1.06519
BTG2	18.9739	11.6976	3.79329e-10	3.56033	4.48709	7.221	3.19728
JPH4	18.9548	21.3346	7.84543e-15	5.91416	7.37027	1.39691	-5.24531
TGFBR3	18.9487	16.533	1.20936e-12	2.68201	3.35573	4.69571	1.67683
ARHGEF9	18.9174	20.5979	1.70149e-14	1.49118	1.86002	2.67128	0.995684
COL1A1	18.8793	11.7701	3.65946e-10	9.28813	11.7176	8.68265	-1.82022
CPAMD8	18.8523	10.1045	3.31645e-09	4.28011	5.42561	4.0209	-0.831964
LDLRAD4	18.7671	18.5968	1.53574e-13	4.95515	6.2012	4.91819	-0.659983
TNXB	18.7513	19.9264	3.96886e-14	7.39598	9.24795	5.08864	-3.23332
CMAHP	18.7394	21.9842	5.25136e-15	5.29896	6.61784	4.82852	-1.12987
DLL1	18.6997	21.1516	1.23373e-14	4.13934	5.17471	4.00039	-0.656632
FMO5	18.6927	19.5291	6.3012e-14	2.77547	3.47394	1.06843	-2.05627
KANSL1L	18.6772	17.26	6.8919e-13	1.65198	2.07218	2.52767	0.665596
SLC22A17	18.6398	21.3954	1.03679e-14	3.66987	4.59043	3.49564	-0.634509
SPEG	18.4919	21.9657	7.03995e-15	5.03427	6.30623	4.19295	-1.4773
PTPN13	18.4732	21.8408	8.09978e-15	2.68065	3.35897	4.37765	1.35784
FHDC1	18.4502	14.2023	2.52806e-11	5.18339	6.54496	1.80794	-4.05623
TXNIP	18.3691	19.7882	6.71956e-14	5.22689	6.56711	7.77633	1.87933
CXCL3	18.3662	21.976	8.02748e-15	4.08094	5.11995	2.04909	-2.55135
AOC3	18.3264	22	8.20837e-15	7.387	9.27222	3.63432	-4.69529
LPP	18.2833	11.0641	1.28652e-09	1.81471	2.31103	6.60169	4.53882
BHLHE40	18.2643	10.0387	4.94256e-09	4.4561	5.69367	7.60939	2.5345
ATP8A1	18.2153	21.9873	9.42078e-15	4.05469	5.09664	4.34008	-0.235586
TMTC2	18.1745	21.6217	1.3928e-14	2.96637	3.73143	3.92945	0.580551
CSRNP1	18.1404	7.66039	1.43378e-07	3.51802	4.55182	6.48493	2.45001
DMD	18.1333	18.9176	2.03808e-13	3.26788	4.12099	4.1184	0.423962
PDGFRB	18.086	21.9358	1.1454e-14	7.15049	9.0031	3.85562	-4.22117
SIK2	17.9267	9.2479	1.69815e-08	2.39455	3.08293	5.24455	2.50581
ZNF577	17.9149	18.5796	3.55163e-13	2.16242	2.73553	1.80248	-0.646494
ANO2	17.8384	17.6598	9.72176e-13	3.23534	4.10052	5.20607	1.53814
PELI2	17.7942	11.6677	8.14545e-10	2.24168	2.8695	3.92054	1.36495
NFKBIZ	17.7843	14.4579	3.13344e-11	2.91678	3.7141	5.25858	1.94314
ITPR2	17.7508	16.7788	2.62246e-12	1.6597	2.10797	6.95068	5.06684
RAB3C	17.7492	21.6354	2.22536e-14	8.11645	10.2665	6.22301	-2.96845
TMEM150C	17.702	14.0617	5.21057e-11	2.81887	3.59575	2.72486	-0.482451
TSC22D3	17.674	9.30967	1.77693e-08	4.06389	5.24999	6.02426	1.36732
CLU	17.6718	21.0192	4.30858e-14	4.85936	6.15551	10.4048	4.89739
PTPRB	17.6212	8.40897	6.20526e-08	2.03551	2.64257	7.63848	5.29944
ITSN2	17.5385	10.695	3.18518e-09	1.40956	1.81573	5.19932	3.58667
GLIS3	17.4918	21.7941	2.59006e-14	3.04945	3.87033	2.20664	-1.25325
MAPK13	17.4604	18.5371	5.8185e-13	2.99664	3.81449	2.40882	-0.996748
HMCN2	17.3828	13.0533	2.08032e-10	8.35002	10.719	4.72018	-4.81432
ZBTB20	17.3799	13.5815	1.14279e-10	2.25798	2.89584	4.28672	1.70981
GHDC	17.3696	14.9971	2.4161e-11	1.7096	2.18787	3.04314	1.09441
N4BP2L1	17.1816	21.96	3.21661e-14	3.66702	4.6739	1.27357	-2.89689
ST8SIA6	17.1806	21.5036	4.8454e-14	5.54766	7.07316	4.07339	-2.23701
PARM1	17.1485	21.8842	3.57967e-14	6.10005	7.77905	3.1996	-3.73995
MYO9A	17.1216	15.0914	2.6848e-11	1.1632	1.49379	4.19068	2.86218
NR4A1	17.1131	8.40858	7.89256e-08	6.69593	8.76131	6.94593	-0.782695
PLVAP	17.0679	18.4099	9.79317e-13	4.18046	5.35195	6.70246	1.93626
CREB3L1	16.8756	18.0171	1.73893e-12	4.30406	5.52802	1.6774	-3.23863
SLC16A5	16.8557	13.5685	1.72703e-10	2.47924	3.20465	3.49314	0.6512
ICAM1	16.6881	15.0551	4.03142e-11	5.08464	6.57313	5.90641	0.0775253
RHOU	16.6706	20.3905	2.37728e-13	4.57534	5.88228	2.98387	-2.24494
KLF11	16.5704	18.1832	2.02529e-12	2.8727	3.70622	3.64071	0.351243
TNS1	16.5034	11.9257	1.41273e-09	2.58912	3.37737	7.25423	4.27099
CPE	16.4778	20.0937	3.86523e-13	5.93751	7.65809	9.06029	2.26249
TPST2	16.4144	19.4936	7.12283e-13	1.48817	1.9223	4.99935	3.29412
PRDM5	16.4095	18.4391	1.8845e-12	1.59505	2.06254	1.46994	-0.358861
COL16A1	16.3719	11.6355	2.15793e-09	4.96286	6.49272	3.34195	-2.38584
GPR146	16.2248	21.1675	2.03171e-13	3.41743	4.42173	0.993188	-2.92639
DACT1	16.1994	20.8742	2.69597e-13	3.98907	5.16462	1.48145	-3.09539
PCDHGB6	16.1914	21.1838	2.08647e-13	2.36419	3.06057	1.43607	-1.27631
PHYHIP	16.1886	20.1936	4.93452e-13	2.46019	3.18746	1.34693	-1.47689
SPIDR	16.121	12.2193	1.33101e-09	1.40436	1.84229	3.98606	2.36273
SLCO2A1	16.0865	20.7074	3.56291e-13	7.28327	9.44811	7.64143	-0.72426
PDGFRA	16.0593	15.2797	5.57353e-11	5.84851	7.63528	1.11377	-5.62813
IFT122	16.0467	11.4718	3.25177e-09	1.65029	2.17194	3.71569	1.80458
MATN2	16.0444	16.8555	1.21515e-11	6.49746	8.46649	7.78735	0.305381
SDC2	16.0391	21.7796	1.5221e-13	4.55287	5.90601	3.41012	-1.81932
LINC00963	16.0029	21.9916	1.3358e-13	1.40138	1.81869	3.52914	1.9191
ASH1L	15.8838	12.8	8.42374e-10	1.20994	1.59159	4.96638	3.56561
RARA	15.8806	18.1776	4.20586e-12	1.34508	1.75491	3.90669	2.3567
PER1	15.8676	8.78642	9.04672e-08	3.33315	4.44635	5.79298	1.90323
HIVEP2	15.7546	15.2272	7.74175e-11	2.81419	3.69347	4.62972	1.37589
MN1	15.7415	14.0296	2.60366e-10	3.6045	4.74141	4.26401	0.0910583
YAP1	15.7405	20.2921	7.68722e-13	1.17304	1.53107	4.48313	3.13108
EPB41L4A	15.7285	17.5527	8.73609e-12	1.77976	2.32967	3.45677	1.40205
ZNF423	15.7135	21.9779	1.95628e-13	3.22565	4.20662	4.59489	0.878747
KIAA0355	15.6912	11.5174	3.95451e-09	1.1364	1.50487	5.39449	4.07386
KCNT2	15.6608	21.0375	4.52834e-13	5.33817	6.97277	4.09859	-2.05687
FAT4	15.6364	12.2232	1.89376e-09	2.4203	3.20216	6.65511	3.84388
CAMK1D	15.5133	21.5221	3.66361e-13	3.54384	4.63919	3.02603	-1.06549
PTK2B	15.4759	21.1459	5.21927e-13	4.00407	5.24663	3.4423	-1.18305
CEP112	15.4633	17.1832	1.61472e-11	1.75468	2.30863	2.5852	0.553541
FOXC1	15.4185	14.1549	3.02595e-10	2.60689	3.44833	5.26841	2.2408
SIRPB2	15.3931	19.1547	3.05476e-12	2.86251	3.76288	2.89627	-0.416427
ASS1	15.3921	17.1013	1.87351e-11	5.92325	7.80402	5.90447	-0.959166
MKL2	15.3793	11.9877	2.95915e-09	2.27425	3.02511	4.8636	2.21392
LEPR	15.3516	20.8164	7.9874e-13	4.03672	5.30255	6.22749	1.55786
C1S	15.3469	21.6019	4.25485e-13	6.79365	8.91925	4.84292	-3.01353
KAT6A	15.3234	10.4229	1.74784e-08	0.898609	1.20245	4.93253	3.88201
CKB	15.3098	21.9997	3.25424e-13	3.32329	4.36471	1.98084	-1.86316
PTPRG	15.2943	10.0578	2.71191e-08	1.8634	2.49834	5.87336	3.69249
HMCN1	15.2909	18.7385	4.91166e-12	4.26108	5.61407	7.70392	2.76634
LRG1	15.256	20.8222	8.96287e-13	6.12849	8.06416	1.58246	-5.51386
TMEM120A	15.2181	18.6079	5.97077e-12	2.2199	2.92908	3.63534	1.06085
GABARAPL1	15.2118	10.2131	2.38982e-08	2.557	3.43172	5.85867	2.86431
ATXN3	15.2076	15.9707	6.38771e-11	1.27336	1.68594	3.21688	1.73723
MRVI1	15.1773	21.2166	7.20828e-13	5.53082	7.28589	3.49013	-2.91823
NOV	15.1695	19.9185	2.09202e-12	4.5722	6.03058	1.75203	-3.54937
ZNF460	15.1396	9.82883	3.89958e-08	1.16805	1.57232	3.81701	2.44683
GPCPD1	15.13	10.7844	1.32207e-08	1.81076	2.42904	3.75647	1.63657
LMO2	15.1253	19.4223	3.33301e-12	1.8609	2.45762	4.55528	2.39602
NBEA	15.1059	18.5917	6.88005e-12	1.93499	2.55852	2.77929	0.532536
TLN2	15.0954	10.0744	3.02009e-08	2.94342	3.96161	2.94737	-0.50515
C1R	15.079	15.1659	1.53964e-10	5.6689	7.53327	5.28036	-1.32073
CBX7	15.0723	16.6586	3.89848e-11	3.28286	4.35346	2.35609	-1.46207
CD74	15.0629	19.9117	2.3953e-12	6.81345	9.00461	5.25759	-2.65144
TMEM8B	15.0416	12.9054	1.46934e-09	3.2883	4.39225	2.17914	-1.66113
RALGAPA1	15.0379	20.7887	1.21319e-12	1.18678	1.56797	3.18335	1.80598
VWF	14.973	19.3783	4.14565e-12	3.1767	4.20757	11.9646	8.2725
PCDHGC3	14.927	16.9764	3.41596e-11	1.7411	2.31437	2.97107	0.943336
THBD	14.8876	21.9446	5.96248e-13	3.60984	4.77853	7.06287	2.86869
MGP	14.884	16.7221	4.48026e-11	4.25717	5.6655	9.38782	4.42648
SELENOM	14.8747	18.1107	1.34932e-11	1.62937	2.16507	3.11003	1.21281
SLC15A3	14.8724	19.7135	3.55439e-12	3.29494	4.37117	2.16987	-1.66318
TFEB	14.8684	17.0004	3.55894e-11	2.1242	2.82673	2.38077	-0.0946939
ACP2	14.8351	15.702	1.18339e-10	0.825057	1.10066	3.37848	2.41562
SCN3B	14.8349	18.7726	8.0783e-12	3.7527	4.98674	3.06375	-1.30597
ZSWIM5	14.8148	13.9841	6.09106e-10	1.87176	2.50554	0.949695	-1.23895
IL1R1	14.8066	18.7732	8.34677e-12	4.15922	5.52998	6.92738	2.08279
B3GNT7	14.8027	21.4807	9.55161e-13	4.31935	5.72913	2.6881	-2.33614
ITGA7	14.7826	21.8323	7.48699e-13	6.25417	8.2964	3.25229	-4.02299
SUSD6	14.7791	18.656	9.50407e-12	1.45764	1.93931	4.42897	2.73049
GAS6	14.7637	13.1086	1.50625e-09	3.04828	4.09228	6.2703	2.70002
MYL9	14.762	21.9966	6.792e-13	3.15959	4.19248	6.03803	2.362
RIPK3	14.7616	17.0664	3.7661e-11	2.30361	3.07165	1.69846	-0.989169
SOCS2	14.7537	16.8497	4.59256e-11	3.93272	5.24622	2.49995	-2.08952
PPP1R15A	14.7146	8.07037	4.09846e-07	2.42677	3.32713	6.45444	3.57749
RBL2	14.6737	21.9147	8.149e-13	0.98205	1.30542	4.31285	3.16912
PLPP1	14.6661	17.0714	4.15706e-11	2.41883	3.23139	2.8505	0.025394
SULF2	14.6362	21.5547	1.12717e-12	2.77192	3.68841	6.9229	3.69274
PTGS2	14.5992	17.2797	3.73572e-11	4.66071	6.2331	7.65935	2.21244
RNF150	14.5969	18.0802	1.89939e-11	3.0742	4.10754	-0.00147213	-3.59234
PCDHGA9	14.5848	21.2412	1.53403e-12	2.16456	2.88392	0.830155	-1.69409
INTU	14.5755	20.0134	4.03799e-12	1.45886	1.94614	1.9967	0.294204
CRTAC1	14.5564	12.8379	2.34679e-09	6.24898	8.43041	7.43955	0.0998555
MED13L	14.5509	10.052	4.41687e-08	1.08533	1.47749	5.49918	4.21777
FAM110D	14.5183	19.0432	9.42381e-12	3.31409	4.43041	2.87134	-1.00091
IL18R1	14.431	21.2668	1.84768e-12	2.19668	2.93573	3.09137	0.525165
FAM168A	14.4209	14.7312	4.32542e-10	0.915501	1.23366	4.07725	3.00267
SLC16A2	14.4179	17.0246	5.6715e-11	2.51589	3.37832	3.40752	0.460413
WDR91	14.3944	11.7636	7.92086e-09	1.04914	1.42438	1.96189	0.725134
CTSO	14.3914	14.2452	6.98363e-10	3.16968	4.27782	3.73087	0.00711668
PBX1	14.3902	12.4155	4.1036e-09	2.38353	3.23038	4.06779	1.26084
SCX	14.3855	19.3434	8.71019e-12	3.49778	4.68724	1.35152	-2.74099
PPM1L	14.3828	14.6595	4.79204e-10	2.23355	3.01258	2.50431	-0.118755
HIPK3	14.3795	9.70317	7.29846e-08	1.74075	2.38228	5.98494	3.92343
ZNF853	14.3642	20.3884	3.94715e-12	3.38928	4.53926	1.45113	-2.51314
NNMT	14.3617	12.4757	3.95556e-09	2.28181	3.09392	6.95205	4.26419
CACNA1H	14.3345	21.9719	1.24526e-12	5.90255	7.89953	1.49036	-5.41068
COL3A1	14.3108	21.9667	1.29197e-12	6.17776	8.27194	9.90159	2.67675
ARRDC4	14.3064	19.8554	6.42626e-12	3.19857	4.29112	2.42477	-1.32008
ZCCHC24	14.2983	16.1283	1.39793e-10	2.44903	3.301	4.05576	1.18075
EGR1	14.2722	12.9918	2.56607e-09	5.69538	7.72728	6.90923	0.197904
CSF2RB	14.2471	14.982	4.07301e-10	2.579	3.48654	6.68249	3.64972
BCAM	14.2257	12.8809	2.97462e-09	2.42114	3.28914	4.9972	2.14206
PLEKHA4	14.2099	10.7641	2.57932e-08	2.33188	3.18936	3.25096	0.490338
FGFR3	14.2076	21.9679	1.49108e-12	4.71807	6.33104	3.81496	-1.7096
STAT3	14.1948	10.8565	2.36527e-08	1.13373	1.55062	6.46474	5.12256
FBXO32	14.1687	21.8576	1.70644e-12	2.77818	3.73134	2.89944	-0.355319
GPRASP1	14.147	8.5265	3.24263e-07	2.99056	4.14058	2.30519	-1.26038
RBP1	14.1334	19.8085	8.31042e-12	3.18609	4.29022	2.32673	-1.41142
CHPF	14.1277	20.9917	3.41745e-12	5.09948	6.85997	1.97776	-4.00197
TLR5	14.127	20.6276	4.49269e-12	5.21556	7.0185	1.85975	-4.25727
COL23A1	14.1072	16.2918	1.48664e-10	7.57668	10.2519	5.34984	-3.56445
PGAP3	14.0547	12.2745	6.21835e-09	2.25093	3.07445	2.62538	-0.0373065
GRAMD1B	14.0512	15.5777	2.92342e-10	2.8009	3.79879	3.76481	0.464971
PPIC	14.0468	21.7301	2.22006e-12	1.49986	2.01988	3.00627	1.2464
FOSL2	14.0449	8.55279	3.33738e-07	2.15172	2.98585	7.07992	4.51113
ZNF397	14.0258	17.7559	4.80447e-11	1.60802	2.17527	2.05255	0.160906
NUCB1	14.004	20.3072	6.72815e-12	1.26049	1.70123	6.40093	4.92007
PROS1	14.0003	15.9383	2.25605e-10	2.73809	3.71561	3.61568	0.388829
KIAA0825	13.9659	21.2929	3.41403e-12	2.10408	2.83961	0.8062	-1.66564
AK9	13.9288	15.0465	5.27808e-10	1.24324	1.69233	0.971956	-0.495826
S1PR4	13.9284	19.0073	2.00091e-11	3.7659	5.09783	1.82342	-2.60845
ST6GAL1	13.9129	20.1431	8.58125e-12	1.2855	1.73872	6.56282	5.05071
C9orf3	13.9015	12.8389	4.09676e-09	1.86051	2.54622	3.73938	1.53601
FGR	13.8989	20.0812	9.15694e-12	6.75694	9.14255	2.72547	-5.22428
CYP27A1	13.8927	19.5603	1.36843e-11	2.42641	3.28524	2.5159	-0.339923
OTUD1	13.8912	11.4702	1.58052e-08	2.40088	3.29959	1.89438	-0.955851
HMBOX1	13.8784	13.2813	2.75232e-09	1.34359	1.83774	4.00022	2.40955
SCUBE3	13.8682	8.69078	3.16112e-07	3.08896	4.30095	3.79904	0.10409
RNASEL	13.836	20.9614	5.19847e-12	1.72879	2.3405	1.37897	-0.655676
JAM2	13.8323	19.4016	1.66854e-11	3.94354	5.34743	2.8149	-1.83059
NDRG1	13.7113	10.2927	6.06591e-08	3.43389	4.76038	7.07233	2.9752
PDLIM3	13.7057	13.0035	4.16623e-09	2.96346	4.07247	4.37001	0.852047
IL17RD	13.7045	20.1212	1.14969e-11	3.40169	4.6226	4.09851	0.0863643
PLPP3	13.6719	16.1235	2.74416e-10	2.23258	3.05137	6.1062	3.46422
SP110	13.6463	12.3699	7.98755e-09	1.57598	2.1725	2.41083	0.536593
SGSM1	13.6451	21.9788	3.29586e-12	3.1451	4.27254	2.09217	-1.61665
PPP1R3C	13.6278	15.2028	6.2655e-10	3.73728	5.12118	2.26482	-2.16441
NHLRC3	13.6177	15.1855	6.42622e-10	1.74929	2.39769	2.44434	0.370843
OLFML3	13.58	21.9698	3.64478e-12	4.24099	5.76993	1.87691	-3.12855
MMRN2	13.5733	12.3848	8.38286e-09	1.46076	2.01711	7.93467	6.19574
FBN1	13.5708	11.8988	1.33927e-08	2.09201	2.89314	7.2069	4.71433
GUCY1A2	13.5686	21.047	7.07967e-12	6.23558	8.49262	3.53446	-3.82964
SNX25	13.5583	15.5428	5.04652e-10	0.793285	1.08816	3.16393	2.22321
PPP2R5B	13.558	11.6186	1.77818e-08	1.91	2.64461	4.33872	2.06141
HSPA2	13.5392	20.4951	1.09421e-11	3.56568	4.86213	5.49908	1.28517
CDKN1C	13.5301	20.4618	1.13478e-11	3.84007	5.23756	3.06499	-1.47382
JUND	13.522	7.85337	1.01924e-06	2.76344	3.90423	6.13704	2.80321
KIAA1211L	13.512	20.324	1.28477e-11	1.7486	2.38629	1.96382	-0.103627
COL6A2	13.512	21.9216	4.16019e-12	4.45851	6.07568	6.19968	0.932579
OPHN1	13.4896	12.6274	7.17284e-09	1.96059	2.711	3.32723	0.991432
ACSL5	13.4854	20.9421	8.568e-12	2.70481	3.69135	2.33786	-0.860219
MAATS1	13.4833	17.5588	1.06632e-10	4.82201	6.60587	1.55687	-4.15707
TANC2	13.4645	13.5816	3.05822e-09	1.93514	2.67098	5.19271	2.88966
HSPB8	13.4638	19.2686	2.96593e-11	1.81779	2.48624	3.33179	1.17978
SSBP2	13.461	12.5675	7.77918e-09	2.25617	3.12241	2.77021	0.0809246
MYO7B	13.4593	21.9616	4.37055e-12	5.16722	7.04988	3.32884	-2.77971
THBS3	13.4571	11.5477	2.06814e-08	2.10569	2.9235	4.43737	1.92278
PLEKHM3	13.4489	11.0672	3.34321e-08	1.27022	1.7669	2.68079	1.16223
TAGLN	13.4264	20.3314	1.43607e-11	5.09807	6.97122	6.35023	0.315589
NPR1	13.4182	18.6928	4.83605e-11	3.21729	4.40805	6.23111	2.41844
ATRN	13.3994	20.6201	1.21321e-11	0.618269	0.845742	4.4351	3.70309
PPP1R14A	13.3781	21.9773	4.87089e-12	5.06174	6.91913	1.22894	-4.76149
RBPMS	13.3724	15.9141	4.52933e-10	1.77094	2.43856	3.40435	1.2996
ALPK1	13.3707	19.9234	2.07728e-11	2.14717	2.94121	2.41879	-0.125405
RAB11FIP1	13.3577	19.4296	3.02641e-11	4.25453	5.83274	5.60358	0.559948
HHAT	13.3483	15.6927	5.58003e-10	2.095	2.88757	0.995188	-1.4961
VCAN	13.3381	17.0084	1.95186e-10	6.4758	8.90932	6.28499	-1.40758
GATM	13.3334	18.2675	7.41656e-11	5.0578	6.94746	1.30134	-4.70129
PRSS35	13.3325	16.5192	2.89885e-10	6.18217	8.51274	0.461507	-6.88595
DNM3	13.2899	21.9685	5.58035e-12	2.11058	2.89116	1.02699	-1.47388
MYLK	13.2815	13.3387	4.51775e-09	3.07758	4.2696	5.06901	1.39542
NR4A2	13.2786	9.14428	2.76809e-07	5.49201	7.74099	2.68598	-3.93052
NAALADL2	13.2764	18.0073	9.69891e-11	3.02429	4.16134	1.43984	-2.15298
LGALS3BP	13.2713	20.9231	1.1737e-11	5.48819	7.52833	1.89244	-4.61582
ZNF44	13.264	17.5451	1.40256e-10	1.58887	2.18825	1.70235	-0.186204
MAGEH1	13.2362	14.8909	1.22698e-09	1.35206	1.87149	3.20554	1.59376
LTBP3	13.2321	11.3566	2.98877e-08	2.69731	3.76875	7.22309	3.99006
IFI35	13.2235	19.739	2.89268e-11	1.82556	2.51007	2.09455	-0.0732692
AC005332.7	13.219	20.5215	1.6718e-11	1.20714	1.65862	2.48208	1.0492
CRY2	13.1957	8.33935	7.06272e-07	2.00956	2.8534	3.81173	1.38025
TSPAN9	13.1915	20.265	2.07958e-11	1.71705	2.36144	5.37143	3.33218
NCOA7	13.1832	9.55932	1.89806e-07	2.63737	3.71832	5.39678	2.21894
COL9A3	13.1831	10.9994	4.40268e-08	5.45937	7.64767	2.8856	-3.66792
BMPR2	13.1644	8.81484	4.26033e-07	1.86297	2.63908	7.48718	5.23616
TRAF1	13.1592	16.3035	4.19511e-10	2.18638	3.02458	1.46378	-1.1417
BSN	13.1331	16.0094	5.46688e-10	3.03448	4.20261	0.885558	-2.73299
AIG1	13.1103	12.6715	9.65901e-09	1.58268	2.20917	2.67898	0.783058
DHH	13.096	19.7299	3.45992e-11	2.81758	3.88634	2.63443	-0.717531
BTN3A1	13.0929	21.8543	8.0692e-12	1.45859	2.00788	2.54935	0.816116
DTX3	13.0792	21.025	1.43955e-11	1.62916	2.24514	2.76653	0.82938
FAM102B	13.0529	13.773	3.83733e-09	1.91679	2.67196	3.28584	0.991463
BTBD9	13.0299	18.2924	1.06755e-10	0.938588	1.29895	2.81236	1.69359
PDZD4	13.0176	21.6824	1.01185e-11	4.86436	6.70986	1.51362	-4.27349
IGF1R	13.0152	9.24018	2.97894e-07	1.84243	2.61392	6.05865	3.83047
BGN	12.9972	16.9386	3.08151e-10	2.27094	3.15138	8.36816	5.657
MRAP2	12.9872	16.3586	4.89214e-10	1.98397	2.75636	3.72189	1.35173
PRKG1	12.9722	21.445	1.2675e-11	3.48738	4.817	1.6468	-2.50538
TULP4	12.9537	13.4128	5.77882e-09	1.13036	1.58116	4.407	3.05124
SMAD7	12.9528	19.9056	3.72043e-11	3.61719	5.00639	4.55314	0.24135
PTGS1	12.9388	21.8946	9.89437e-12	3.52911	4.87681	7.23982	3.03686
CPQ	12.9374	18.4498	1.07109e-10	2.17907	3.02224	3.25644	0.65578
IL15	12.9357	16.7523	3.82616e-10	2.69789	3.75087	0.902733	-2.32165
MYO15B	12.9307	16.2335	5.75884e-10	3.32066	4.62114	5.45102	1.48012
UBL3	12.9304	9.99714	1.44734e-07	1.52034	2.15341	3.11078	1.27391
CFI	12.921	21.6571	1.18799e-11	2.69299	3.72386	2.90781	-0.300612
ASAP3	12.9025	21.3789	1.46785e-11	2.14021	2.96163	4.50686	1.95594
PLCG2	12.902	14.4309	2.55315e-09	2.64367	3.69434	3.96687	0.797869
CCM2L	12.8936	21.7268	1.18217e-11	1.90156	2.63116	2.40028	0.133925
NKD1	12.8808	21.2208	1.68339e-11	4.70149	6.51052	0.786951	-4.81905
ABLIM1	12.8775	21.4369	1.46581e-11	2.1815	3.02055	7.27872	4.6777
LRP1	12.8707	12.3828	1.55755e-08	3.20082	4.5	5.12151	1.2711
ZNF652	12.8473	9.76984	1.93566e-07	0.989725	1.40667	3.47349	2.27529
ELF2	12.8158	8.93791	4.68621e-07	1.14035	1.62985	3.69887	2.31377
KDM4C	12.7944	8.58989	6.88902e-07	1.01266	1.45154	2.85684	1.62474
RBMS3	12.7884	11.4873	3.80836e-08	1.53465	2.16876	4.25126	2.39956
CYP2U1	12.7772	18.6601	1.13443e-10	1.66525	2.31866	2.68495	0.692994
HSD3B7	12.7389	16.9496	4.16721e-10	2.14425	2.99572	0.814882	-1.7551
SPEF2	12.7294	21.9838	1.28287e-11	2.29691	3.19105	0.37107	-2.37291
NIPAL3	12.7208	14.868	2.15796e-09	1.65272	2.31866	3.78396	1.79827
NFKBIA	12.6608	7.90117	1.58791e-06	2.98677	4.32062	6.65613	3.00243
EPSTI1	12.6548	20.9089	2.88397e-11	4.74694	6.61451	1.72364	-3.95709
PAG1	12.6501	21.1859	2.42268e-11	5.2152	7.26595	1.08375	-5.15683
ITGB4	12.6393	21.5945	1.88961e-11	4.48202	6.24385	6.93247	1.56953
C1QTNF1	12.6344	15.974	9.91645e-10	3.06579	4.30221	2.27516	-1.40884
GLT8D2	12.6316	20.862	3.07763e-11	3.42477	4.77536	2.88658	-1.21348
KLF10	12.6114	9.12865	4.40821e-07	2.20807	3.17084	5.95391	3.26445
SLC40A1	12.6098	20.7152	3.49956e-11	2.69688	3.76316	4.86858	1.63856
CTSK	12.6035	17.0318	4.62285e-10	2.34018	3.28104	2.40802	-0.402586
CYP1B1	12.6028	20.839	3.25938e-11	7.62527	10.6408	5.14225	-3.9908
CPED1	12.5995	21.9307	1.61973e-11	3.89331	5.42786	0.138096	-4.52249
SELP	12.5802	17.4395	3.52572e-10	5.62394	7.88522	6.84374	0.0891587
ITGA11	12.5689	11.5446	4.35482e-08	3.46856	4.93102	3.08809	-1.11171
ATXN1	12.5586	11.6511	3.98647e-08	1.53118	2.1766	4.50972	2.65583
CDON	12.558	16.1511	9.46279e-10	3.65578	5.13934	3.94229	-0.455267
NR3C1	12.5575	21.9129	1.74754e-11	1.5285	2.13341	4.60708	2.77612
ADSSL1	12.555	17.571	3.30761e-10	3.13178	4.39321	1.49343	-2.26906
CELSR1	12.5469	21.4853	2.33121e-11	3.47545	4.85416	5.19615	1.03134
LTBP4	12.5361	11.6785	3.96501e-08	3.69523	5.25569	7.06171	2.58625
ACYP2	12.5326	21.8305	1.91282e-11	1.67201	2.33546	0.197388	-1.80635
PALLD	12.5317	10.4507	1.25282e-07	2.06176	2.94717	4.9989	2.49443
TLCD2	12.5303	13.1476	1.09467e-08	2.19123	3.10298	1.95903	-0.688075
TTBK2	12.5273	18.0908	2.36021e-10	1.42852	2.00397	3.37003	1.65379
SEMA7A	12.4947	16.4471	8.15622e-10	3.362	4.73229	2.05711	-1.99004
ALDH2	12.4646	21.9239	2.00332e-11	1.41863	1.98505	4.54559	2.84375
TM6SF1	12.4562	14.0941	5.35705e-09	1.11222	1.57456	2.29099	0.9476
PTTG1IP	12.446	10.0298	2.01197e-07	0.936817	1.34519	7.25301	6.11201
PAN2	12.4425	20.3608	5.6372e-11	1.48257	2.07897	3.49158	1.71081
COL6A1	12.4382	12.9571	1.40811e-08	2.3758	3.37497	5.48299	2.6076
NET1	12.4378	10.3638	1.46611e-07	1.92307	2.75761	5.36218	3.02183
SLC9A7P1	12.4269	21.0102	3.78671e-11	1.5875	2.22559	0.86806	-1.03848
RTKN	12.4159	10.5793	1.21492e-07	1.72606	2.4743	3.77981	1.67963
ADAMTS10	12.3988	19.6548	9.57273e-11	3.04802	4.28273	4.21196	0.546586
BMPR1A	12.3729	21.5985	2.83015e-11	2.49688	3.50376	1.2897	-1.71062
CCDC146	12.3484	21.278	3.59509e-11	3.62868	5.09702	0.433707	-3.92914
NKAIN2	12.3478	21.4061	3.31926e-11	5.53861	7.77896	0.778055	-5.88073
THRB	12.3474	21.8536	2.51124e-11	5.74487	8.06534	2.38319	-4.52192
PLA2G6	12.3447	11.2204	7.09817e-08	2.21872	3.17876	1.88503	-0.813708
MCL1	12.3409	9.16788	5.11264e-07	2.21815	3.21048	8.13358	5.41926
GHR	12.3402	21.8124	2.60547e-11	3.73431	5.24394	1.62817	-2.86096
SLC30A4	12.3211	16.5778	9.13119e-10	1.6843	2.38194	2.31632	0.283199
NIPAL2	12.3194	12.4638	2.40767e-08	1.81244	2.58739	2.64412	0.444205
TAL1	12.3026	16.2424	1.19619e-09	0.645899	0.914441	4.50121	3.72104
SYNE2	12.285	12.9141	1.69452e-08	1.99583	2.84826	6.11289	3.69085
CXXC5	12.2827	15.5981	1.98585e-09	2.26359	3.21033	2.57225	-0.164702
APOL6	12.2821	21.5803	3.29309e-11	2.60379	3.66318	3.05413	-0.0793559
CREBRF	12.2597	15.5239	2.15747e-09	2.51005	3.56276	3.41678	0.380371
KCND1	12.2579	12.752	1.9953e-08	3.2849	4.69389	1.27658	-2.71282
LIMS2	12.2556	18.0239	3.53262e-10	3.35557	4.74389	5.74117	1.69144
NYNRIN	12.2498	9.16089	5.4911e-07	1.92632	2.79607	5.60814	3.24694
SCARNA13	12.2309	13.134	1.48629e-08	1.79944	2.57051	4.0437	1.85873
VPS13D	12.2297	13.3595	1.23455e-08	0.928476	1.32557	5.14322	4.0162
KLRD1	12.2126	14.7703	4.06078e-09	5.13373	7.30813	1.08375	-5.13718
FUCA1	12.2123	21.242	4.52623e-11	1.9104	2.69392	2.84733	0.545175
NCOA1	12.2117	8.10022	1.68598e-06	1.47991	2.16711	3.94905	2.12554
ACACB	12.1469	14.7153	4.55789e-09	3.23369	4.61287	3.04614	-0.877139
SLMAP	12.1453	8.26186	1.48312e-06	0.891281	1.30623	4.37766	3.2789
DCN	12.1418	21.821	3.53559e-11	6.47321	9.14156	7.69422	-0.113166
MAN1C1	12.141	20.2867	9.2014e-11	4.36614	6.17571	3.71485	-1.55607
ACVR1	12.1234	20.5996	7.7462e-11	1.29952	1.83843	3.60852	2.03955
APOL1	12.1169	18.3594	3.37865e-10	2.5505	3.61866	4.02444	0.93986
CTAGE5	12.116	10.3419	1.93212e-07	0.775821	1.12356	2.49464	1.54495
CA5B	12.096	9.04399	6.88454e-07	1.91181	2.79058	1.97511	-0.376084
ANKRD37	12.0794	11.7301	5.68049e-08	2.78172	4.00989	1.55253	-1.84328
PCDHB11	12.0789	17.5694	6.10829e-10	4.43832	6.31134	0.68837	-4.68646
DYRK1A	12.0785	10.823	1.27752e-07	0.698404	1.01041	4.75818	3.90377
SMIM14	12.076	19.5562	1.61814e-10	1.55733	2.20883	2.87976	0.996685
JUN	12.0585	7.93717	2.20819e-06	2.49674	3.67948	7.88627	4.79816
NPTXR	12.0277	21.4699	5.23479e-11	2.48735	3.52562	1.43558	-1.5709
CPNE5	12.027	20.1687	1.17402e-10	2.67893	3.80246	4.34655	1.10585
MAN2B2	12.0171	21.3231	5.81955e-11	1.1301	1.60257	4.0222	2.65587
KLHL13	11.9708	21.9206	4.36745e-11	1.99177	2.82672	4.28194	1.8727
FNBP1	11.967	19.951	1.47234e-10	1.60701	2.28565	5.29643	3.3501
BCL3	11.9566	18.7932	3.15395e-10	1.60843	2.29165	3.31955	1.36951
MSRB3	11.9497	17.2119	9.25793e-10	1.15264	1.64637	5.10433	3.70482
STAT2	11.9404	17.7788	6.35022e-10	0.995015	1.42038	4.73382	3.52612
MPZL2	11.937	21.5635	5.70529e-11	2.70343	3.84192	5.70553	2.43286
AMY2B	11.9249	21.8497	4.90251e-11	3.8354	5.45107	1.07109	-3.57214
PDZD2	11.9219	19.771	1.76306e-10	2.26093	3.22076	2.91173	0.170879
FOXP1	11.9212	9.71728	4.06014e-07	1.51633	2.21684	6.23583	4.36924
SERGEF	11.9177	15.0495	4.57599e-09	0.985214	1.41423	0.756713	-0.443007
FOXN3	11.9161	8.7327	1.06687e-06	1.18426	1.74247	4.23036	2.767
IRF1	11.9007	11.4467	8.54438e-08	2.04854	2.97281	3.44871	0.938041
EEF1A2	11.8886	21.0161	8.56319e-11	2.97183	4.23188	4.15938	0.55753
RPS6KA5	11.8736	18.5407	4.17954e-10	1.51586	2.16596	1.92231	0.0814008
CYBRD1	11.8545	13.3235	1.86413e-08	2.24687	3.2453	5.0799	2.33382
CD14	11.8467	21.9658	5.19046e-11	5.94387	8.46684	2.59646	-4.6089
SYNM	11.8414	12.2782	4.43801e-08	2.31416	3.3546	2.86182	0.0274372
STOM	11.833	11.7054	7.26371e-08	1.85775	2.69916	7.19024	4.91178
MIR4697HG	11.8266	20.4658	1.31754e-10	5.85735	8.36161	1.12389	-5.98559
LINC00672	11.8068	15.135	4.88086e-09	3.18182	4.58238	0.433095	-3.449
RASGEF1B	11.7925	18.8987	3.71017e-10	5.92085	8.47726	2.36379	-4.83527
MAP3K1	11.7906	11.7095	7.52663e-08	1.43466	2.08728	4.05348	2.29251
AMIGO1	11.7709	21.7914	6.49519e-11	2.27091	3.24291	0.999893	-1.75702
LRP6	11.7705	7.63967	3.62287e-06	1.20255	1.79458	5.12355	3.62499
FAM161B	11.7373	21.4914	8.17507e-11	1.1983	1.71349	1.09939	-0.356511
AP005131.6	11.7352	11.485	9.59615e-08	3.72849	5.43908	0.877485	-3.7063
PARP9	11.7349	14.2883	9.99094e-09	2.21295	3.20049	3.9094	1.20268
KLF2	11.7318	11.689	8.08583e-08	4.29973	6.2682	6.17636	0.892402
LSR	11.7263	8.47917	1.56857e-06	3.09329	4.58936	3.02997	-0.811352
AFAP1L2	11.726	20.2224	1.78172e-10	4.50987	6.45995	4.61319	-0.871718
TMOD1	11.7141	21.8326	6.95093e-11	4.37155	6.25345	2.67154	-2.64097
SETBP1	11.6907	21.8447	7.16788e-11	2.38812	3.41862	4.45155	1.54817
ZBTB16	11.6893	18.7603	4.69543e-10	3.2895	4.72594	3.14112	-0.866599
FHL1	11.6726	21.3439	9.88277e-11	1.51355	2.16899	4.85484	3.01357
FREM1	11.6693	18.3334	6.3586e-10	4.46572	6.42368	1.75963	-3.68506
OSMR	11.667	21.7114	8.04675e-11	2.39604	3.43298	4.68169	1.76718
DDX59	11.6658	12.7574	3.5591e-08	0.837188	1.21864	2.04508	1.01716
SPTLC3	11.6563	20.5731	1.60223e-10	3.75724	5.39154	1.57125	-3.00313
NR4A3	11.6549	20.7471	1.44675e-10	5.67502	8.1423	1.16884	-5.73982
INTS6L	11.6287	21.1686	1.17455e-10	1.03422	1.48443	1.73293	0.4736
SLC25A25	11.6125	7.95624	2.87837e-06	2.57142	3.84726	4.96985	1.76051
ZNF570	11.6035	13.8068	1.66607e-08	1.06433	1.54778	1.39713	0.0910771
SLIT3	11.6017	19.0529	4.42251e-10	4.72331	6.80219	4.6186	-1.14415
FOXS1	11.5924	18.4175	6.70762e-10	4.49251	6.47738	-0.0482777	-5.53322
GRASP	11.5886	8.05364	2.64649e-06	1.93592	2.89638	5.72673	3.31058
SFMBT2	11.56	21.3297	1.19281e-10	2.37136	3.41054	1.28801	-1.60294
CAMK2D	11.5435	17.0704	1.73317e-09	1.5845	2.29296	4.67847	2.73974
TAPBPL	11.5339	14.8613	8.19959e-09	1.34951	1.96196	2.06627	0.410542
ST6GALNAC1	11.5262	16.9334	1.94388e-09	4.89698	7.09221	3.72582	-2.26878
KLF9	11.5146	9.48121	6.93737e-07	2.37098	3.51928	5.47731	2.53218
INPP5K	11.5039	12.2765	6.1674e-08	0.922567	1.35236	3.92611	2.78865
CUX1	11.4989	13.8527	1.80366e-08	1.40197	2.04567	4.9457	3.22188
C11orf96	11.4842	10.6967	2.37376e-07	3.54686	5.23596	1.86438	-2.52703
CCNL1	11.4745	8.89456	1.24635e-06	1.33026	1.98505	5.25489	3.59723
SLC44A2	11.4724	10.7417	2.30604e-07	1.71521	2.53254	6.43963	4.31576
ZNF711	11.4703	15.6189	5.14676e-09	1.23871	1.80175	1.78862	0.268388
IGSF9B	11.4531	21.7447	1.11826e-10	5.43122	7.83504	2.53748	-4.09565
DHRS3	11.4267	21.5025	1.33946e-10	2.09065	3.01932	4.48043	1.92544
ANAPC16	11.4204	9.3637	8.32496e-07	0.926827	1.38134	3.70888	2.5548
ZNF365	11.4115	21.7203	1.21391e-10	4.05784	5.86196	2.48143	-2.47847
GPR107	11.4058	12.1238	7.68494e-08	0.834331	1.22781	4.81449	3.78342
IFIH1	11.3983	21.9812	1.07182e-10	2.45797	3.5514	2.67357	-0.331115
CFLAR	11.388	11.031	1.9368e-07	0.829703	1.22709	5.99231	4.96392
PLLP	11.371	9.3866	8.46596e-07	1.80951	2.70128	2.29576	0.0403673
ELFN1	11.3655	19.6123	4.44673e-10	1.95721	2.83851	1.68939	-0.708468
ZFAND4	11.3655	10.0234	4.75985e-07	1.76932	2.63188	1.76918	-0.431427
SERPINE2	11.3607	21.4207	1.56214e-10	3.81083	5.51613	5.2697	0.606221
CPEB3	11.3556	12.5117	5.92145e-08	2.02457	2.98056	1.45977	-1.04279
RNASE1	11.3548	9.242	9.80665e-07	2.23605	3.34314	6.83515	4.04556
TGFB2	11.3469	20.3319	2.98676e-10	3.73094	5.40952	4.41853	-0.151698
SELE	11.3434	16.4381	3.43993e-09	3.65271	5.3273	2.44483	-2.04517
BTBD3	11.3393	8.68582	1.68068e-06	1.01332	1.52189	3.48453	2.21693
SLC16A4	11.333	19.3013	5.63125e-10	2.43187	3.53216	2.66564	-0.316372
RABGAP1	11.2969	16.3183	3.959e-09	0.944973	1.3807	4.1348	2.97196
CHSY1	11.2913	8.03709	3.28087e-06	1.49803	2.26617	5.44718	3.56508
SYNE1	11.2886	18.92	7.58139e-10	1.65582	2.40985	5.26959	3.23676
PLA1A	11.2795	21.4261	1.77831e-10	6.12359	8.88795	3.59579	-3.90998
MDFIC	11.2474	10.4413	3.63888e-07	1.9977	2.97774	3.81511	1.32739
ZNF641	11.239	21.3597	1.97206e-10	1.88304	2.73704	2.40706	0.0970205
LRRK2	11.2254	11.949	1.05577e-07	3.62719	5.3754	2.34781	-2.15348
CSPP1	11.2214	14.8282	1.21363e-08	0.83146	1.22188	2.0661	1.03944
C5orf56	11.2097	14.864	1.19993e-08	1.89178	2.78098	1.27589	-1.06049
PRICKLE2	11.2031	20.8164	2.83737e-10	1.85624	2.70302	3.23281	0.95318
AGO3	11.1958	8.1244	3.21075e-06	1.26392	1.91745	4.14953	2.55884
ANKRD29	11.1935	14.4298	1.6653e-08	3.55792	5.23875	0.77191	-3.62642
RASSF9	11.1922	15.777	6.51965e-09	2.73636	4.01697	2.73457	-0.642095
CARMIL1	11.182	19.0864	8.02815e-10	2.37387	3.46678	4.53988	1.61956
H3F3B	11.1819	10.0029	5.64442e-07	1.40702	2.10726	6.90946	5.15232
NR1H3	11.1813	16.0111	5.64493e-09	1.81713	2.6673	1.56245	-0.679762
ZNF81	11.172	15.9307	6.02938e-09	0.728817	1.07033	1.51466	0.61509
MEGF6	11.1669	11.345	1.82408e-07	2.41926	3.60157	6.71884	3.70843
CALD1	11.1478	16.7391	3.64531e-09	1.0839	1.59069	6.90172	5.56442
HEG1	11.1353	14.8443	1.32992e-08	2.61072	3.84817	8.25266	5.02322
ATP2A3	11.1333	21.5909	2.06606e-10	5.52694	8.0608	4.23587	-2.558
ADAM32	11.1265	21.3987	2.32195e-10	1.68116	2.45297	0.518329	-1.54874
INHBA	11.1175	19.5088	6.88986e-10	2.12027	3.10163	4.44909	1.83814
AC241952.1	11.1108	19.2299	8.20132e-10	1.47622	2.1608	1.22038	-0.598134
DNAH1	11.1056	14.2224	2.13967e-08	2.01647	2.98001	3.40462	0.906377
TSPAN2	11.1024	21.9205	1.81907e-10	4.91324	7.171	3.27979	-2.76233
CFH	11.0976	21.8234	1.93263e-10	2.70486	3.94887	6.88833	3.56147
ARHGAP44	11.0942	17.7659	2.04172e-09	2.90575	4.26496	2.18617	-1.39919
DDX60	11.0884	13.2889	4.31443e-08	2.20507	3.26929	3.83007	1.09289
GADD45B	11.0796	10.3693	4.47745e-07	2.86944	4.30538	5.35263	1.76522
MAN1A1	11.0691	10.8099	3.11149e-07	1.40537	2.10484	3.92338	2.16828
PTCH1	11.0679	9.78004	7.55312e-07	1.41452	2.13034	2.54296	0.77053
EBF4	11.0383	21.8901	2.06054e-10	2.73702	4.00385	1.65584	-1.7146
BAZ2B	11.0223	19.6348	7.41036e-10	0.989687	1.4524	4.58324	3.3622
NTPCR	11.0084	15.4332	1.03652e-08	1.00302	1.48323	2.82166	1.57853
GABRB3	10.9976	21.7256	2.411e-10	4.24364	6.21788	2.80331	-2.42745
CTDSP2	10.9775	17.3736	3.06941e-09	0.677772	0.999631	5.60461	4.76591
ZFP14	10.9708	20.2413	5.68819e-10	1.52789	2.24464	1.37434	-0.511928
VASN	10.9691	11.0029	2.90499e-07	2.28644	3.43428	1.13392	-1.72643
SEMA4C	10.9594	20.3584	5.4244e-10	1.20865	1.77612	3.95598	2.46359
SSPO	10.9583	14.3511	2.3193e-08	2.99506	4.44862	2.18735	-1.53449
TGM2	10.9373	15.4438	1.12536e-08	1.08908	1.61467	9.20007	7.84819
ZNF568	10.9357	21.812	2.55655e-10	1.36062	1.99784	1.284	-0.395232
IFITM1	10.9234	16.4314	5.99722e-09	4.30406	6.37145	4.03334	-1.30441
IRF7	10.9124	10.9927	3.08782e-07	1.48801	2.24	2.30196	0.437959
KIF26A	10.9112	11.1465	2.72716e-07	1.61205	2.42511	5.21368	3.1951
ZNF248	10.8997	19.6563	8.85412e-10	1.03697	1.5285	1.64378	0.361046
SOBP	10.899	19.5247	9.55367e-10	1.58504	2.33683	1.88005	-0.0808882
TNFAIP3	10.8933	18.8797	1.39851e-09	3.56049	5.25503	4.57443	0.166667
DENND5B	10.8899	10.7446	3.86477e-07	1.1594	1.74891	2.94458	1.49043
NOTCH3	10.8818	12.7947	7.79573e-08	3.67503	5.49942	4.7743	0.187069
FAM228B	10.8766	16.4028	6.50104e-09	1.30361	1.93323	0.254812	-1.36361
MOB2	10.8657	9.50563	1.13579e-06	1.30085	1.97799	4.1181	2.47868
ACVR1B	10.8649	10.1232	6.65563e-07	1.0946	1.6582	4.13444	2.75804
NAB1	10.8568	12.761	8.2098e-08	1.04533	1.56594	3.51009	2.20446
KDM7A	10.8532	8.75207	2.26111e-06	1.68086	2.5709	3.64262	1.51674
SETDB2	10.8354	15.1448	1.56207e-08	1.49275	2.2231	1.64205	-0.215878
FBLN5	10.8322	21.1	4.44827e-10	3.84676	5.67408	5.63471	0.874289
FRY	10.8251	11.215	2.79987e-07	1.33257	2.01076	5.26633	3.59467
PDCD4	10.8234	11.5162	2.20699e-07	1.74352	2.62756	3.92042	1.73488
TTC39B	10.8148	13.8954	3.77889e-08	1.30944	1.95786	1.71584	0.0821919
ADARB1	10.8142	9.15063	1.62287e-06	1.19135	1.81962	3.72644	2.22096
TNS3	10.7922	19.4269	1.192e-09	1.86508	2.7609	4.91831	2.60533
PGM5	10.7754	16.3264	7.81422e-09	6.80039	10.1248	5.44015	-3.02244
FILIP1L	10.763	21.9008	3.28033e-10	1.54103	2.27689	4.29572	2.38676
ADPRH	10.7612	21.9967	3.13103e-10	1.52501	2.25313	1.81923	-0.0698415
ENPP2	10.7552	21.5824	3.92311e-10	3.64804	5.39342	1.65494	-2.86579
OLFML2B	10.7545	9.98118	8.26055e-07	4.07912	6.21176	2.09791	-3.04753
N4BP2L2	10.7534	11.5562	2.2906e-07	0.975377	1.47373	4.6635	3.43895
MAP3K2	10.7461	16.1808	8.91294e-09	1.10084	1.6413	3.69114	2.32007
PKNOX2	10.7458	17.637	3.62557e-09	6.02915	8.965	3.78759	-3.70948
RAB6B	10.7431	15.6352	1.27059e-08	3.23674	4.83192	3.47805	-0.556282
PLXDC2	10.7358	17.7574	3.42229e-09	5.08284	7.55922	4.25402	-2.06701
C14orf37	10.7333	19.1659	1.51386e-09	1.75999	2.61206	0.397296	-1.78873
DACT3	10.721	14.2554	3.28391e-08	2.94526	4.41531	0.91152	-2.76876
TMTC1	10.7189	17.9857	3.06255e-09	4.29743	6.39287	6.2491	0.903945
RHOB	10.7135	15.2077	1.74564e-08	1.81871	2.72076	8.97677	6.70703
VPS13B	10.7054	13.707	4.89582e-08	1.06737	1.60355	4.21434	2.87887
ITM2B	10.6984	10.5489	5.40477e-07	1.56079	2.37468	6.34771	4.37997
JAK3	10.6847	10.9511	3.95138e-07	2.8184	4.2818	2.62577	-0.924324
BCAS3	10.681	21.9973	3.59811e-10	1.39876	2.07282	2.5653	0.829515
LSAMP	10.6665	14.1088	3.87487e-08	5.45139	8.19298	1.37908	-5.4431
CD34	10.6648	16.2129	9.73525e-09	2.61118	3.90508	6.51769	3.25956
ANKRD12	10.6589	13.9414	4.38823e-08	1.4123	2.12419	3.98486	2.21662
MEDAG	10.6468	11.0368	3.82491e-07	1.42298	2.16426	4.43529	2.64167
VSTM4	10.6448	16.6286	7.71992e-09	5.33804	7.98273	2.80508	-3.8553
CPVL	10.6443	16.9894	6.19245e-09	5.02534	7.51012	0.419185	-5.84855
KMT5B	10.6292	11.3062	3.14563e-07	0.75356	1.1455	3.01196	2.06242
FAM167B	10.6223	19.5404	1.4602e-09	2.72429	4.05821	0.460723	-2.93053
ART4	10.597	17.9093	3.82974e-09	2.60548	3.89464	4.62458	1.37452
BACH1	10.5778	11.1532	3.72742e-07	1.27998	1.95117	3.97885	2.36328
CFP	10.5768	14.1114	4.30378e-08	2.78741	4.20412	1.05503	-2.44073
LRRC37A16P	10.5729	18.9083	2.24192e-09	1.34985	2.01646	1.10632	-0.576836
RILPL2	10.5584	21.7734	4.98999e-10	0.976684	1.4545	2.59006	1.37446
PCNX1	10.5569	10.0377	9.35371e-07	0.836352	1.28355	4.71913	3.65918
TNFAIP1	10.555	9.60189	1.35203e-06	1.07415	1.65312	5.63136	4.26772
DUSP5	10.5505	8.52229	3.50699e-06	2.56552	3.98133	5.7717	2.49827
HVCN1	10.5449	16.1418	1.1958e-08	1.80812	2.71723	0.0141088	-2.24856
CRTC3	10.5392	12.673	1.23337e-07	0.643638	0.976642	3.41083	2.60069
TMCC1	10.5375	12.5898	1.31268e-07	0.902802	1.3704	3.10153	1.96493
MPP7	10.5285	19.6148	1.62716e-09	4.61461	6.89854	3.72107	-2.0355
RNF217	10.5178	17.7321	4.76973e-09	0.832002	1.24791	2.92055	1.88059
COQ7	10.517	18.052	3.96856e-09	0.854903	1.28162	2.48819	1.41993
MCF2L	10.5153	19.1436	2.15062e-09	5.35791	8.01921	3.18281	-3.50575
PRDM11	10.5093	9.32155	1.78596e-06	1.57836	2.43846	2.99805	0.989642
CAMKK1	10.497	8.47428	3.81432e-06	1.88323	2.93051	2.63508	0.228211
GNA14	10.4961	21.9942	4.98104e-10	2.49505	3.72383	2.16817	-0.941273
SEMA6A	10.485	14.7409	3.1617e-08	2.18968	3.30925	2.16903	-0.580433
CREB5	10.4825	14.4347	3.88135e-08	2.18839	3.31028	3.65629	0.906962
JDP2	10.4825	16.6382	9.60357e-09	2.44601	3.6813	2.52893	-0.534724
SMARCA2	10.4808	9.10559	2.2042e-06	0.749051	1.16047	4.76918	3.81442
CRYAB	10.4787	17.565	5.56684e-09	5.74787	8.63711	2.54031	-4.65218
EHBP1L1	10.4753	8.35121	4.33601e-06	1.6246	2.53323	4.82166	2.74274
KCNAB2	10.4622	16.4433	1.1118e-08	1.91104	2.87964	1.51324	-0.882106
GARNL3	10.4567	9.97677	1.07448e-06	1.88383	2.90445	1.37555	-1.01859
PLSCR1	10.4532	8.58186	3.57898e-06	1.62818	2.53611	4.43984	2.35769
GJC2	10.4524	16.3152	1.21835e-08	3.2407	4.88641	0.953118	-3.11044
SEZ6L2	10.4429	20.4232	1.21587e-09	2.48005	3.71609	3.41285	0.314784
IFIT2	10.4392	21.954	5.61754e-10	3.05349	4.56772	1.39948	-2.41112
IRAK3	10.4347	15.64	1.89525e-08	1.97593	2.98585	4.6731	2.19221
NDRG4	10.4251	20.8289	1.01527e-09	2.0134	3.01747	5.67126	3.15582
STOX2	10.4161	19.0081	2.70607e-09	4.83076	7.26027	2.00302	-4.04249
SCAPER	10.4158	10.1625	9.56904e-07	1.15718	1.78526	2.20701	0.735791
NUAK1	10.3843	10.1927	9.60541e-07	1.57598	2.43424	5.53207	3.52696
DSTYK	10.3831	15.7429	1.9032e-08	1.03158	1.56176	3.41373	2.11707
KCTD18	10.3757	14.9801	3.10859e-08	1.03072	1.56375	1.66678	0.369546
PIM1	10.3693	8.11533	5.81892e-06	2.98427	4.68579	4.67098	0.835946
SARM1	10.3688	11.3062	4.0646e-07	1.42196	2.18511	1.33798	-0.465558
MTMR3	10.3643	11.5771	3.32639e-07	1.34776	2.06895	1.40204	-0.30632
KCNN4	10.3629	18.8264	3.24863e-09	4.90758	7.39364	2.07419	-4.07642
CX3CL1	10.3558	20.5201	1.33714e-09	4.34076	6.52612	1.45027	-3.98317
AC020916.1	10.3531	9.13917	2.37558e-06	2.22019	3.458	4.24934	1.41025
SIDT2	10.3502	10.7154	6.53468e-07	1.29428	1.9963	3.8765	2.23121
TGFBR1	10.339	10.6959	6.70659e-07	1.74284	2.68975	3.87465	1.65835
IL11RA	10.3311	8.17242	5.68059e-06	1.90495	2.99456	2.33114	-0.118611
IFI44L	10.3306	10.4039	8.51488e-07	5.10563	7.89497	4.27233	-2.22797
RRNAD1	10.321	11.2389	4.48623e-07	0.790945	1.21832	1.7984	0.793771
SYNGR2	10.3184	22	6.80475e-10	1.09095	1.6398	4.32704	2.96167
PCDHB13	10.317	21.6045	8.27861e-10	2.53815	3.81699	0.632198	-2.54537
WDPCP	10.3005	11.9939	2.61013e-07	1.32733	2.03956	1.31453	-0.368919
SHF	10.2956	16.5492	1.31486e-08	2.00583	3.04251	1.77859	-0.745583
CD200	10.2882	19.1145	3.12513e-09	1.8626	2.81352	2.49634	0.158281
TNFRSF11B	10.2845	21.9767	7.31071e-10	4.33843	6.53025	1.50226	-3.93208
HEPH	10.2827	16.6542	1.25814e-08	3.60762	5.47392	3.53758	-1.00319
AC004540.1	10.2824	21.1094	1.12376e-09	2.41509	3.63918	0.658249	-2.36889
ADCY4	10.2737	15.28	2.93414e-08	2.17313	3.30859	6.21012	3.46926
SBNO2	10.2705	7.7135	9.06079e-06	1.37258	2.17408	5.56738	3.79405
HYAL1	10.2619	18.4649	4.63213e-09	2.55652	3.86981	2.19344	-1.01973
PAIP2B	10.2418	15.5563	2.57876e-08	2.33035	3.55042	0.615527	-2.32486
ADAM8	10.2315	12.2666	2.30728e-07	4.92238	7.57793	1.91032	-4.33983
ITGA9	10.2196	18.7235	4.29769e-09	3.30014	5.0022	2.36658	-1.78459
GNE	10.2175	21.8189	8.89105e-10	0.586847	0.885924	2.59546	1.85907
CCDC3	10.2168	15.6198	2.56455e-08	3.75371	5.7242	4.04425	-0.694707
ENTPD1	10.2135	16.7524	1.31028e-08	2.12023	3.22581	5.28999	2.61697
FBLN7	10.21	21.9003	8.66358e-10	3.03438	4.5818	0.775302	-3.03279
SLC7A8	10.2061	19.1043	3.58064e-09	1.90519	2.88774	1.41107	-0.985398
STMN3	10.1986	16.9187	1.21543e-08	3.88704	5.91571	3.9368	-0.964579
ADGRL1	10.1982	10.7917	7.12368e-07	2.12652	3.30057	4.33094	1.6174
LAMA3	10.1966	21.7263	9.64949e-10	2.01866	3.05041	3.75328	1.21874
EPS15	10.1888	10.0602	1.27562e-06	0.596411	0.929927	4.30022	3.53705
RPS6KA2	10.1835	17.9532	6.92251e-09	1.18498	1.80115	6.13511	4.64204
ZMAT1	10.1824	20.2245	2.08014e-09	2.45979	3.72613	1.85085	-1.24211
CPXM2	10.1794	16.3337	1.7577e-08	4.35631	6.64321	6.25362	0.753859
AL353743.1	10.1668	20.3444	2.00944e-09	1.82152	2.76064	-0.00787495	-2.29895
TAF1	10.1603	11.6983	3.75161e-07	0.699275	1.08245	3.67846	2.7876
MVB12B	10.1582	7.94447	7.93869e-06	1.74759	2.77565	3.4576	1.19598
PKDCC	10.1517	21.8842	9.69147e-10	2.09395	3.16954	2.65194	0.0201974
ZNF844	10.1492	19.1497	3.82886e-09	2.90402	4.41196	2.23196	-1.42603
FAM84B	10.1481	13.2451	1.28421e-07	1.37996	2.12464	4.00704	2.25474
C18orf32	10.1413	21.3034	1.30584e-09	1.17447	1.77975	0.275569	-1.20154
B3GALT4	10.1368	20.9735	1.54631e-09	1.61846	2.45402	0.459948	-1.57629
C7	10.1315	21.2493	1.36381e-09	5.48185	8.31096	4.27205	-2.62435
CSRP2	10.1285	9.28286	2.53684e-06	1.69733	2.66774	1.46942	-0.71311
TMEM25	10.1081	17.4491	1.0262e-08	0.748341	1.14216	2.44873	1.50347
XAF1	10.0803	9.11645	3.03558e-06	2.64844	4.17723	2.9675	-0.44533
BST1	10.0798	15.0259	4.4292e-08	1.80338	2.7704	1.89128	-0.395613
ANGEL1	10.0619	15.7091	2.99615e-08	0.894545	1.37301	3.19759	2.06382
IKZF2	10.0549	21.7542	1.22656e-09	2.70057	4.10521	0.796611	-2.60628
ZNF559	10.0491	21.9921	1.10833e-09	1.04551	1.58927	1.771	0.453611
HIP1	10.0466	12.7982	1.95484e-07	0.929005	1.43904	4.98417	3.80015
APOL3	10.0415	21.788	1.2365e-09	2.03016	3.08775	4.04552	1.48656
PPP1R15B	10.0411	10.6783	9.04523e-07	0.956319	1.4958	5.28109	4.05503
TNFSF10	10.032	21.9976	1.14014e-09	2.15495	3.27811	4.56391	1.84738
LMBRD1	10.0314	11.0242	7.03616e-07	1.71295	2.67558	2.78195	0.587687
SORT1	10.0313	21.9326	1.1769e-09	2.2486	3.42092	3.37115	0.536397
ATP9B	10.028	14.9138	5.07818e-08	0.803423	1.23742	2.59444	1.57402
SNX18	10.0224	10.1467	1.38765e-06	1.25419	1.96946	4.42724	2.81541
TMEM205	10.0208	20.5367	2.34115e-09	1.06061	1.61707	2.56201	1.22318
DENND2C	10.0157	21.0308	1.85704e-09	2.45317	3.73871	0.457279	-2.63866
SLC39A11	10.0109	10.7599	8.75611e-07	1.35652	2.12378	2.00593	0.265782
PLEK	10.0064	13.3737	1.39248e-07	5.06859	7.84972	1.58073	-4.87843
RNF180	10.0047	19.1425	4.85226e-09	1.51264	2.31247	1.19941	-0.713143
CEP350	10.0029	11.3142	5.84547e-07	0.609925	0.952566	4.3513	3.57006
FBXO34	9.99788	8.21014	7.05724e-06	1.37029	2.18718	4.1419	2.36316
SMOC1	9.96437	19.3415	4.67881e-09	5.22567	8.00053	3.42091	-3.19219
ZNFX1	9.95001	8.48881	5.74846e-06	1.03439	1.65045	5.4481	4.10568
SSH1	9.92902	12.4205	2.89028e-07	1.15233	1.79714	5.08983	3.61509
AC104083.1	9.92792	21.9391	1.41591e-09	4.73982	7.24344	2.83194	-3.15969
ZNF506	9.92491	19.429	4.77602e-09	2.42608	3.72034	2.16103	-0.912183
LINC00847	9.91718	20.2975	3.1437e-09	0.979617	1.50087	0.235942	-1.0043
FMOD	9.91391	20.2318	3.2644e-09	6.30027	9.65489	3.96219	-4.01538
ST5	9.90882	11.4229	5.95308e-07	1.8748	2.93932	2.28713	-0.119925
ZFP3	9.90082	18.0802	9.97491e-09	1.34816	2.07412	0.920207	-0.790934
GATA6	9.89862	17.1363	1.66695e-08	1.63362	2.51796	4.36942	2.29363
HERC2P9	9.88922	9.25775	3.17746e-06	2.19872	3.49585	2.52213	-0.325158
INAFM2	9.88556	17.7387	1.22537e-08	0.728513	1.12226	3.00556	2.08018
ZEB2	9.87182	11.271	6.90259e-07	1.10799	1.74143	4.6428	3.21809
GOLGB1	9.87003	19.1242	6.09779e-09	0.731604	1.12518	5.02601	4.09762
ZBTB44	9.86748	9.30302	3.12094e-06	0.835041	1.32862	3.51771	2.43588
SPINT2	9.86583	20.306	3.41885e-09	3.13156	4.80878	2.95844	-1.01173
YPEL5	9.86277	13.1413	1.92407e-07	1.36454	2.12892	4.26068	2.51396
ARHGEF6	9.85834	21.9978	1.56554e-09	1.89209	2.90025	2.86452	0.468354
GSTK1	9.85221	17.3684	1.57413e-08	0.529213	0.817044	4.0613	3.38818
PARP11	9.8484	17.2957	1.64691e-08	1.00632	1.55413	1.13193	-0.148298
ABHD2	9.84376	12.4576	3.10213e-07	1.29131	2.02161	5.53296	3.8765
LRP2BP	9.84282	11.656	5.4049e-07	1.33871	2.10308	0.324583	-1.39631
SULF1	9.83591	18.1568	1.06026e-08	4.1333	6.37685	9.77779	4.52272
TNS2	9.83262	9.98718	1.87362e-06	1.48698	2.35856	6.02366	4.10088
METTL7A	9.82525	17.5468	1.48942e-08	1.97279	3.04847	4.02302	1.5124
TMEM87A	9.82257	16.0443	3.43364e-08	0.712452	1.1045	3.2588	2.35032
VWA5A	9.803	14.336	9.69983e-08	0.908041	1.41523	2.73579	1.57415
SOX5	9.80255	21.8908	1.8208e-09	3.07454	4.72517	0.223537	-3.67632
BMPER	9.80032	19.4245	5.88429e-09	4.57886	7.0611	4.50916	-1.31082
LINC00702	9.80012	16.5073	2.73034e-08	2.96474	4.59621	0.95019	-2.83029
DYNC2H1	9.79076	21.2842	2.45537e-09	1.61131	2.47952	3.09625	1.05084
NOP53	9.78183	13.667	1.51215e-07	1.17452	1.83616	5.20443	3.69909
UTP14C	9.77639	15.1139	6.28395e-08	0.642047	0.999758	2.44382	1.62292
TMBIM1	9.76514	10.0198	1.94582e-06	1.11579	1.77527	6.3836	4.93807
TRO	9.75446	15.4754	5.23884e-08	1.46195	2.2767	3.05187	1.18255
PLEKHA7	9.74977	21.9894	1.91955e-09	2.31289	3.56273	2.18531	-0.752497
ADAMTS15	9.74843	20.8984	3.16732e-09	5.45922	8.42118	2.42955	-4.51064
HERC2	9.74291	7.49052	1.61851e-05	1.71612	2.79711	6.30544	4.04883
RUNDC1	9.74003	12.9315	2.55168e-07	0.763021	1.19828	2.59389	1.61324
DHX58	9.73924	16.2744	3.39554e-08	1.77319	2.75816	1.95542	-0.31026
JMY	9.73502	19.8183	5.4145e-09	1.22469	1.89316	3.1595	1.60057
ERO1B	9.71539	17.5071	1.79956e-08	1.27242	1.97638	0.937638	-0.686764
SYNPO	9.71231	15.0366	7.17043e-08	1.65616	2.5872	7.11	4.98832
AHCYL2	9.71063	18.1409	1.30229e-08	1.21541	1.88605	3.40795	1.85722
ZNF395	9.70887	12.7656	2.95026e-07	1.26428	1.98969	3.16104	1.53406
GMDS	9.70708	11.3212	7.90511e-07	1.30355	2.06462	2.83222	1.14814
DENND2D	9.70511	21.9445	2.12712e-09	2.91438	4.4987	1.46137	-2.24517
METRNL	9.69477	9.49522	3.11823e-06	1.70185	2.72714	4.53204	2.31755
ID1	9.68668	20.3383	4.59006e-09	1.5651	2.423	5.97753	3.98348
ARSG	9.68644	9.32773	3.58533e-06	1.38734	2.2269	1.19138	-0.615738
GPM6A	9.68068	18.3565	1.22311e-08	5.01039	7.78298	1.15972	-5.23697
CASKIN2	9.67796	10.6458	1.32426e-06	1.10841	1.76441	4.17713	2.74072
MFGE8	9.67455	21.5877	2.63979e-09	1.59193	2.46188	4.63421	2.60731
TSC22D1	9.67398	8.49752	7.12028e-06	2.16271	3.49856	6.20189	3.37126
CALHM2	9.66957	14.1211	1.31299e-07	1.14612	1.7988	3.08274	1.61029
ZNF493	9.66194	10.6583	1.33327e-06	1.69726	2.70374	1.20756	-0.992942
TTLL7	9.6591	21.9297	2.33185e-09	1.44966	2.24255	1.16535	-0.68076
CD83	9.65623	20.0379	5.57732e-09	2.5139	3.89907	0.247334	-2.95915
ZNF471	9.65536	12.1414	4.74857e-07	1.62835	2.57584	1.09864	-1.00346
ELMO1	9.64997	15.9653	4.58727e-08	1.30987	2.04756	4.51056	2.83185
CXCL16	9.64657	21.8846	2.4348e-09	1.68226	2.60403	1.68596	-0.457186
LIFR	9.64518	10.0168	2.18333e-06	2.12732	3.40508	6.37829	3.61209
IPCEF1	9.64146	21.6449	2.73412e-09	4.56394	7.06845	0.582959	-5.23324
KLF7	9.63746	10.3735	1.68418e-06	0.861005	1.37558	4.66134	3.54305
LYNX1	9.63336	14.9989	8.15517e-08	2.54844	3.99658	2.15211	-1.1204
IER2	9.62882	7.33307	2.02407e-05	1.86398	3.06284	4.81771	2.3543
IQCG	9.62623	16.7304	3.11823e-08	0.77648	1.21307	0.65958	-0.335196
SAMD12	9.62195	19.7357	6.83043e-09	2.15078	3.34275	2.81481	0.0680465
LRRC49	9.62048	19.3431	8.27142e-09	1.03017	1.60218	1.50471	0.188534
TLE1	9.61878	12.0682	5.197e-07	1.06282	1.68482	4.28317	2.90936
ZNF660	9.61812	20.5962	4.58998e-09	2.40758	3.73794	1.02312	-2.04964
TRANK1	9.61647	13.7888	1.72213e-07	1.88479	2.96887	3.18414	0.757304
SNX33	9.61646	12.6944	3.44373e-07	1.07241	1.69582	3.84324	2.45913
PIK3IP1	9.61406	21.5764	2.96439e-09	2.06543	3.20324	3.07797	0.443635
MYOM3	9.61351	21.0814	3.70641e-09	4.10569	6.37164	1.76026	-3.47841
KIAA1109	9.60345	18.2262	1.47854e-08	0.888618	1.38573	5.25684	4.11967
MMP2	9.60256	20.2262	5.60209e-09	1.77389	2.75755	8.20345	5.93773
IGIP	9.60148	13.245	2.46307e-07	1.84285	2.91032	1.19385	-1.18274
ARRDC2	9.59323	11.3009	9.04165e-07	1.23996	1.97523	3.01728	1.40969
TOGARAM1	9.59187	14.2367	1.3531e-07	0.741231	1.16733	2.80188	1.8476
PDE1C	9.58854	20.1368	5.98569e-09	2.05754	3.20102	1.22675	-1.40253
MBOAT1	9.58458	18.0969	1.62683e-08	1.0335	1.61349	0.492387	-0.831107
EFCAB13	9.57992	14.6122	1.09913e-07	2.2749	3.58074	1.62215	-1.30568
PTPRJ	9.57764	17.6163	2.10314e-08	2.14199	3.34818	4.16076	1.41568
FHOD3	9.56962	20.458	5.32974e-09	4.02148	6.25923	0.461656	-4.6787
ATL2	9.56926	11.5364	7.87921e-07	1.31872	2.10078	4.46478	2.75503
ZNF25	9.56593	11.4676	8.29125e-07	1.00081	1.59514	2.03247	0.734496
CYYR1	9.56488	12.799	3.41989e-07	1.89072	2.99628	4.67169	2.22819
STAG1	9.56296	16.7712	3.35238e-08	0.580413	0.909455	3.846	3.10107
KMT2C	9.55921	10.4581	1.7093e-06	0.778906	1.24873	5.0982	4.08438
ADGRG6	9.55754	13.2837	2.53625e-07	1.72911	2.73627	7.13565	4.90295
TSHZ3	9.55638	19.3465	9.19825e-09	1.75636	2.73993	2.35897	0.110824
ZNF362	9.54081	14.8454	1.01049e-07	1.41322	2.22725	3.46393	1.64369
SLC2A10	9.54052	19.3293	9.52642e-09	0.793417	1.23872	2.79459	1.77852
SMAD9	9.53266	20.2099	6.37805e-09	1.48083	2.30974	3.42895	1.53367
IL10RA	9.53217	21.9753	2.89632e-09	5.3478	8.32209	1.91429	-4.92065
MOAP1	9.52591	13.961	1.73944e-07	0.869607	1.37515	2.91189	1.78951
SLC2A3	9.52321	10.713	1.47372e-06	2.73589	4.38767	5.57894	2.01716
ZNF615	9.52019	16.1795	4.91346e-08	0.837252	1.31638	0.826685	-0.25013
C3orf70	9.51943	21.6923	3.35466e-09	3.42801	5.33969	1.39922	-2.98463
ZNF33A	9.50739	12.8596	3.52299e-07	0.985648	1.56613	2.92567	1.64978
LDLRAD3	9.49794	11.5652	8.34713e-07	1.19991	1.91819	4.11561	2.55657
FBXL17	9.49584	16.8239	3.60574e-08	1.15399	1.81394	2.00004	0.516076
SOCS5	9.4832	11.6547	7.98269e-07	1.26285	2.01947	2.79195	1.15078
LRP11	9.48276	9.77243	3.06004e-06	1.22844	1.98615	3.62321	2.01591
TTC9	9.48113	21.987	3.17176e-09	3.38286	5.2772	1.36318	-2.96685
TSPAN7	9.4806	20.6695	5.66962e-09	3.32455	5.19522	4.16367	-0.096214
CYB5R1	9.46762	15.4234	8.04037e-08	0.681447	1.0762	2.90082	2.022
MOCOS	9.46343	21.6862	3.73275e-09	1.59442	2.49033	0.0927722	-1.94961
PLCD3	9.455	10.8252	1.45912e-06	1.35505	2.17946	3.74063	1.97338
TIMP1	9.45391	19.2989	1.11903e-08	1.96022	3.07348	6.58509	4.06824
CASP10	9.44543	14.3211	1.55865e-07	0.997812	1.5825	4.22234	2.93219
CALCOCO1	9.43964	21.8761	3.59619e-09	1.33996	2.09482	5.1058	3.38841
EPHX2	9.43356	21.5137	4.25222e-09	3.22053	5.0386	0.601869	-3.5277
TRMT10B	9.43265	18.8347	1.44734e-08	0.424051	0.666087	0.711457	0.166388
PDE3A	9.42871	16.6887	4.28389e-08	1.33485	2.10585	5.28968	3.56933
PCMTD1	9.42146	9.19859	5.02033e-06	2.11102	3.43933	4.81746	2.04228
CEBPB	9.41448	8.07798	1.24521e-05	2.04649	3.37132	3.22522	0.516314
PDLIM5	9.40813	21.5738	4.34374e-09	0.830052	1.30016	6.35449	5.28938
DNAJB5	9.40353	11.4691	9.87484e-07	1.07481	1.72744	2.10399	0.702866
PIK3C3	9.3957	14.9802	1.1401e-07	0.631438	1.00204	3.49699	2.68025
RCAN1	9.39429	8.60371	8.22488e-06	1.65203	2.70977	4.09591	1.91501
VPS36	9.38951	11.6593	8.82428e-07	0.897834	1.44272	3.78924	2.61896
FN1	9.38444	17.7861	2.61594e-08	1.17443	1.85271	11.6666	10.153
SPIN1	9.38118	10.9407	1.45296e-06	0.796252	1.28483	4.31667	3.27612
USP11	9.37743	13.4377	2.88341e-07	0.921644	1.47105	3.54887	2.35252
RSAD2	9.37019	15.0445	1.13895e-07	5.25987	8.35639	1.04823	-5.7599
KIDINS220	9.36936	9.3028	4.85484e-06	0.675571	1.10283	4.85917	3.96997
AC004540.2	9.36717	18.3937	1.99539e-08	2.88561	4.55097	0.565825	-3.15246
LAYN	9.36182	20.8229	6.55963e-09	1.70748	2.68336	0.0714667	-2.12396
ZNF548	9.35982	13.9894	2.11957e-07	1.08349	1.72772	1.89817	0.492565
ZC3H12A	9.35121	8.70413	7.87242e-06	1.78235	2.92769	2.70672	0.351699
PLSCR4	9.35028	17.2032	3.70154e-08	2.00986	3.17982	5.64826	3.05342
ZNF662	9.34049	21.3925	5.32572e-09	2.40033	3.77333	1.11389	-1.97294
SELENOP	9.34005	20.0913	9.44825e-09	3.55892	5.60493	0.417573	-4.16435
STAT5B	9.33861	10.4315	2.17189e-06	0.645624	1.04729	4.55047	3.70401
CC2D2A	9.33335	20.4772	8.04517e-09	0.608191	0.957621	2.43507	1.65217
TCEAL1	9.33291	12.1899	6.64178e-07	1.16284	1.86954	1.48586	-0.0303296
NUPR1	9.33186	18.9935	1.58904e-08	4.81748	7.60341	1.91147	-4.29897
COPZ2	9.32958	18.9721	1.61126e-08	1.24383	1.96342	1.57423	-0.0293933
ABCA1	9.32358	20.6158	7.70125e-09	2.4337	3.8331	4.9014	1.768
CLDN15	9.32029	11.0215	1.46501e-06	1.03955	1.68212	1.97832	0.617479
TIAM1	9.30371	21.6294	5.15709e-09	2.91635	4.59159	0.916339	-2.83763
PRR5	9.30291	17.4321	3.55192e-08	1.3573	2.15159	1.46517	-0.289274
C1orf198	9.3019	8.74638	7.94236e-06	1.08757	1.79064	3.48898	2.04987
DCHS1	9.3015	10.3375	2.41062e-06	1.08577	1.76586	6.4802	5.05439
NPR2	9.29346	17.5365	3.42244e-08	1.61609	2.56252	3.60141	1.51211
TCTN1	9.29274	21.9531	4.59588e-09	0.779871	1.22803	1.95333	0.94938
CREG1	9.28955	12.8256	4.67868e-07	1.80764	2.90517	3.73316	1.37676
RBMS2	9.28929	9.9167	3.30544e-06	1.0455	1.70631	5.67475	4.29884
GNB5	9.27948	11.0134	1.53843e-06	0.768997	1.24713	2.25072	1.24266
NPEPPS	9.27212	18.3753	2.35375e-08	0.724691	1.14851	3.96125	3.02465
AVPI1	9.27161	12.6176	5.44191e-07	1.66301	2.67752	1.81819	-0.352077
ZNF521	9.27116	14.1999	2.10639e-07	1.37839	2.20666	6.08078	4.28826
PURA	9.26825	9.01776	6.61891e-06	1.16122	1.91081	3.63761	2.10159
CTDSP1	9.26675	10.1309	2.89324e-06	0.805392	1.31413	4.71099	3.65123
HMGN3	9.25806	10.7483	1.88824e-06	1.09048	1.77324	3.80224	2.37038
TNFRSF1B	9.25636	11.4553	1.17109e-06	1.09178	1.76865	5.1503	3.72009
PTPN6	9.25148	17.1561	4.421e-08	4.73408	7.52868	1.17112	-4.96026
BTG1	9.23705	16.8405	5.30174e-08	1.39888	2.22785	4.86787	3.05451
SPAG16	9.23533	20.877	8.07069e-09	1.28244	2.0282	0.509757	-1.14557
KIAA2026	9.23369	9.94811	3.4099e-06	1.0693	1.75012	3.7376	2.32788
DENND2A	9.23075	21.5375	6.14891e-09	4.25344	6.72247	0.664777	-4.82318
GRK5	9.22771	11.2546	1.3816e-06	1.13193	1.83848	4.98515	3.49994
RARG	9.22669	13.2572	3.8855e-07	1.14775	1.84774	2.73975	1.24201
KIZ	9.22449	17.4282	4.02821e-08	0.978264	1.55706	1.17737	-0.0902911
FBXO25	9.2197	9.28963	5.6204e-06	1.15454	1.90061	2.72855	1.20097
BEST1	9.21204	12.0336	8.44464e-07	2.25936	3.65865	1.13961	-1.8194
TET1	9.20214	13.3844	3.71443e-07	2.0332	3.276	1.46645	-1.18815
COL21A1	9.1875	21.9959	5.5215e-09	3.18445	5.04123	0.271078	-3.84176
AC004656.1	9.18539	15.8158	9.73751e-08	1.67634	2.6835	1.96906	-0.210859
GDF7	9.17901	21.9761	5.65763e-09	4.35877	6.90349	6.7334	1.10227
CALCOCO2	9.1784	11.9819	9.07368e-07	0.897921	1.45705	4.25528	3.0778
AEBP1	9.17739	13.8918	2.84804e-07	1.61362	2.59879	5.2443	3.1381
CDH22	9.17307	15.7278	1.03863e-07	3.87238	6.20441	-0.218565	-5.25696
EBF1	9.15083	20.0276	1.36011e-08	3.50003	5.56663	0.379944	-4.15339
ITGB2	9.15032	16.5786	6.91669e-08	5.64299	9.03358	2.75268	-4.5856
ZNF525	9.14541	21.3609	7.77234e-09	1.84823	2.93474	1.86923	-0.522255
WBP1L	9.14514	13.361	4.04914e-07	0.849479	1.37308	4.52211	3.41083
APLF	9.135	12.564	6.63049e-07	1.63544	2.65328	1.28167	-0.862685
R3HDM2	9.12404	9.81527	4.17587e-06	0.790101	1.30241	2.30441	1.25815
AKNA	9.12306	10.6805	2.278e-06	1.2428	2.03696	3.69248	2.0526
NFIA	9.12191	9.51957	5.18835e-06	1.6565	2.73707	5.27388	3.07709
ZNF383	9.11896	11.8891	1.03104e-06	0.947771	1.54367	1.03827	-0.207449
PCMTD2	9.11662	21.9967	6.32599e-09	0.974199	1.54795	3.39937	2.1383
OBSCN	9.11611	8.16002	1.48156e-05	1.73542	2.90535	1.92851	-0.391868
TSPYL2	9.10872	9.16661	6.82476e-06	1.38796	2.30177	3.1777	1.33284
MAGI2	9.10595	14.4724	2.25529e-07	1.37493	2.2188	1.1732	-0.623666
CASP1	9.1036	21.2491	8.80751e-09	2.59878	4.13621	1.94957	-1.41792
LHX6	9.10156	21.3788	8.37949e-09	3.28815	5.23306	3.48992	-0.770683
ZNF154	9.10108	19.428	1.9358e-08	2.14939	3.43079	1.9816	-0.808487
DOCK11	9.09612	9.30291	6.23693e-06	3.14552	5.21428	0.756761	-3.42314
MTERF2	9.08782	14.1281	2.80266e-07	1.10537	1.78753	1.34446	-0.101986
EMP2	9.07253	17.5544	4.82924e-08	1.83137	2.93777	4.60421	2.21964
CCDC149	9.07208	20.5664	1.24328e-08	1.09328	1.74467	2.04024	0.621266
HERC5	9.07146	20.3559	1.36133e-08	2.46201	3.93026	0.843969	-2.35217
MX1	9.06462	13.8138	3.45483e-07	3.81544	6.18453	4.07414	-0.925846
ACKR3	9.06297	15.1059	1.69474e-07	2.89322	4.67113	7.07	3.28782
SYDE2	9.06095	12.8104	6.248e-07	1.36667	2.22409	1.10889	-0.686487
KCNJ15	9.05136	10.6753	2.46504e-06	2.81695	4.636	1.46049	-2.26598
PMEPA1	9.05062	18.618	3.04304e-08	1.42979	2.29158	4.2593	2.39861
TMEM50B	9.04682	12.1166	9.717e-07	0.864495	1.41223	2.81157	1.6732
CCDC69	9.04508	21.9992	7.25722e-09	1.74453	2.7825	3.87313	1.60962
FAM189A2	9.04492	21.4059	9.22379e-09	3.13334	5.00156	3.06439	-1.00306
HECA	9.04321	15.5177	1.40193e-07	0.9719	1.56906	3.68593	2.41545
NR1H2	9.03719	12.9167	6.03833e-07	0.585037	0.952936	3.81817	3.04918
TTC28	9.03555	11.1663	1.80725e-06	1.01062	1.65997	4.50616	3.17086
MFSD6	9.03512	12.0581	1.02179e-06	1.58711	2.59512	2.58483	0.493712
HSPA1A	9.03058	21.2427	1.01319e-08	1.10304	1.76246	2.34156	0.908812
SAV1	9.02603	8.3411	1.3831e-05	1.05013	1.76402	2.79716	1.39008
TMEM45A	9.02544	10.7895	2.34607e-06	1.51255	2.49126	1.88484	-0.117067
C1RL	9.02359	15.2098	1.69635e-07	1.46737	2.37353	3.92773	2.00728
GRIK4	9.01904	14.5781	2.39799e-07	4.14002	6.71086	0.755725	-4.66971
NDRG2	9.01678	16.7972	7.62136e-08	5.12753	8.26383	2.4124	-4.28328
ATP10D	9.01333	15.7991	1.26583e-07	1.29149	2.0869	4.17517	2.48597
HSPA1B	9.0099	9.03921	8.21689e-06	1.89109	3.15793	3.28649	0.761979
FAM189A1	9.00906	19.2526	2.45745e-08	4.55236	7.30457	3.00549	-2.92298
FZD8	9.00447	12.3071	9.08428e-07	1.86325	3.04845	4.8379	2.38205
ADAMTS3	8.9829	21.7294	9.11389e-09	1.68495	2.69744	0.819718	-1.37147
FBXW4	8.97996	12.1211	1.04873e-06	1.00308	1.64484	2.30531	0.981352
C16orf45	8.96808	16.7999	8.21351e-08	1.00915	1.63078	3.04641	1.72645
EIF4A2P4	8.95397	18.3928	3.97083e-08	1.03964	1.67581	0.199032	-1.15869
PLK3	8.95105	7.43432	3.05913e-05	1.65119	2.81799	4.751	2.51641
GINM1	8.93559	16.2092	1.15587e-07	1.05839	1.71587	3.44556	2.05843
AFF1	8.92234	8.52958	1.30632e-05	1.29412	2.18323	5.63788	3.89921
ZNF846	8.91952	16.4096	1.07264e-07	1.29964	2.10786	0.754037	-0.949708
RASL11A	8.91951	11.5928	1.56453e-06	1.67526	2.76387	0.463275	-1.75629
SORBS2	8.9024	21.8193	1.02782e-08	1.41359	2.27276	3.75108	1.90791
ACOX2	8.88634	19.2551	3.04433e-08	1.58858	2.56631	0.712663	-1.36478
AKAP6	8.88508	13.8134	4.38601e-07	3.37012	5.51848	0.969403	-3.47489
ABI3BP	8.87899	13.8581	4.3134e-07	3.72391	6.09898	6.32	1.40856
CISH	8.87828	9.91561	4.95754e-06	2.62449	4.38588	1.45239	-2.05279
NCOA3	8.87653	8.05544	1.96312e-05	0.996425	1.69471	4.95181	3.60625
GBP4	8.87624	17.6321	6.40659e-08	2.62073	4.24922	5.17872	1.74375
EXOC6B	8.87429	8.3049	1.61875e-05	1.17386	1.99104	4.76436	3.18191
TMEM86A	8.8741	21.6126	1.17756e-08	1.31561	2.11914	0.631814	-1.08556
VPS13A	8.86361	12.0277	1.27518e-06	1.0246	1.69228	4.73412	3.37568
ASRGL1	8.86209	15.1605	2.19743e-07	1.11435	1.81927	2.96396	1.49715
GPD1L	8.85912	12.3077	1.08216e-06	1.02621	1.69317	3.19944	1.83975
EPB41L1	8.85773	11.254	2.08032e-06	2.09052	3.46788	3.69922	0.920024
BBS9	8.85473	16.2664	1.2717e-07	0.991634	1.61481	1.84497	0.541745
IRF2BP2	8.84823	10.9571	2.54456e-06	1.0997	1.82841	5.0659	3.60184
GPR68	8.84592	11.8865	1.4197e-06	2.51768	4.16555	0.937413	-2.4042
ZNF793	8.83921	17.1483	8.52851e-08	3.36454	5.47243	0.792752	-3.62573
DOC2B	8.83618	16.7716	1.02472e-07	5.09066	8.28853	4.21517	-2.47443
EMILIN1	8.836	21.8475	1.15703e-08	2.97736	4.80457	4.42026	0.529299
CNST	8.83527	10.6331	3.18959e-06	0.648287	1.08086	2.8283	1.96372
CARF	8.8317	13.361	6.0651e-07	1.54397	2.5403	1.08341	-0.958729
LETMD1	8.83156	17.4996	7.32946e-08	0.571078	0.928555	2.64377	1.89396
SKIL	8.83043	10.5956	3.28657e-06	1.70671	2.84704	5.93845	3.66158
SEMA4A	8.82117	10.006	4.93413e-06	2.87132	4.81186	1.11711	-2.72448
FSTL1	8.81618	17.4604	7.65395e-08	0.937032	1.52506	8.45739	7.22635
LRP4	8.81445	10.9199	2.7051e-06	1.26383	2.10605	2.77801	1.09307
ZBTB8A	8.80901	10.3949	3.84146e-06	1.29763	2.17031	1.83269	0.0987197
ELMSAN1	8.79383	9.4269	7.58938e-06	0.945815	1.59492	5.27766	4.00729
PPM1M	8.79229	11.5373	1.87509e-06	0.749298	1.24595	2.65033	1.65271
ZNF418	8.782	21.9353	1.24361e-08	1.33468	2.16012	0.895196	-0.852206
DENND1A	8.77713	10.8017	3.04198e-06	1.07463	1.79614	3.16012	1.72474
IQCA1	8.77341	18.7507	4.61591e-08	2.57988	4.19839	2.98876	-0.400368
CASC4	8.77317	9.71771	6.31621e-06	0.718794	1.21079	4.3014	3.33661
TMEM59	8.77227	9.40182	7.88786e-06	1.04009	1.75662	5.22962	3.83126
MEF2A	8.76416	8.89606	1.14391e-05	1.23198	2.0913	4.78669	3.12505
PAM	8.76253	18.8282	4.54911e-08	0.876806	1.42757	5.74824	4.59605
STARD8	8.76211	12.1922	1.30451e-06	0.924127	1.53441	3.80771	2.57844
TRIOBP	8.76152	10.5105	3.74161e-06	0.839156	1.40651	5.49034	4.3675
EVA1C	8.75287	12.2339	1.28688e-06	0.973954	1.61772	3.44912	2.15328
HERPUD2	8.74545	8.86948	1.1866e-05	0.686076	1.1663	3.031	2.10481
HDAC5	8.7449	21.9101	1.35074e-08	1.10356	1.78991	3.82109	2.37435
TMEM91	8.7447	21.3759	1.65852e-08	0.79771	1.29481	1.41655	0.37029
FAM13B	8.74065	9.42418	8.00563e-06	1.11222	1.88182	2.58505	1.08803
AKAP13	8.73226	15.0895	2.75268e-07	0.824491	1.3566	5.55412	4.46358
RALGAPA1P1	8.7231	20.7745	2.18732e-08	0.807416	1.31335	0.245485	-0.814896
ALS2CL	8.72148	9.13401	1.00195e-05	1.89455	3.21756	4.12045	1.5644
LIMCH1	8.71922	18.6203	5.36601e-08	1.7996	2.93854	3.95392	1.58485
GNAL	8.71742	17.2943	9.70999e-08	2.44978	4.01154	0.526606	-2.70405
FLOT2	8.71658	15.646	2.13062e-07	0.681597	1.12074	5.47762	4.57645
ANTXR1	8.71549	19.9104	3.14033e-08	3.31063	5.39479	3.79986	-0.552848
TLR3	8.71073	21.0042	2.04598e-08	2.22859	3.62641	1.5639	-1.3636
SLC24A1	8.70646	13.9237	5.25669e-07	0.766717	1.26829	2.54413	1.52663
ZBTB10	8.7064	11.4715	2.15689e-06	1.0461	1.74923	3.57387	2.1762
GAB2	8.70369	12.5726	1.12126e-06	0.72154	1.20019	4.99517	4.03431
VSIR	8.70339	10.6448	3.64861e-06	2.39173	4.01973	3.68982	0.484091
KIF16B	8.70092	16.634	1.35498e-07	0.865916	1.42151	2.04181	0.898099
MFAP3L	8.69322	12.4494	1.2202e-06	2.25049	3.74788	0.202288	-2.7969
CC2D2B	8.68697	16.9461	1.19767e-07	3.36959	5.53208	0.764446	-3.68639
RELB	8.68564	17.3827	9.8253e-08	1.67499	2.74743	2.27548	0.0642724
ZNF10	8.677	17.7376	8.496e-08	1.33256	2.1852	0.421307	-1.33758
MTMR9LP	8.67487	18.6808	5.64786e-08	1.95603	3.20196	3.95778	1.37879
BCOR	8.6744	16.0779	1.84043e-07	0.705024	1.16083	3.50138	2.56845
SCAF11	8.6701	9.74213	6.88509e-06	0.709694	1.20301	5.27862	4.32226
NFATC1	8.66766	7.52666	3.54113e-05	2.23543	3.88056	5.08605	2.02806
ZNF880	8.66662	20.3349	2.89613e-08	1.41917	2.31763	1.60459	-0.263811
DDX5	8.66025	10.0105	5.79976e-06	0.58434	0.989103	7.25809	6.47137
PLAC9	8.65908	21.981	1.55858e-08	1.97841	3.22461	1.84577	-0.755746
LRIG1	8.64886	10.0393	5.75654e-06	1.01768	1.7235	5.04831	3.67772
Z99129.4	8.64622	10.2241	5.10584e-06	1.63889	2.77229	1.49415	-0.711441
ZFP37	8.63889	20.1981	3.22073e-08	1.68042	2.74938	0.199873	-2.01503
MINDY1	8.63835	21.7118	1.79575e-08	0.942463	1.53856	2.6367	1.39619
ADAMTSL4	8.63547	7.75271	3.03924e-05	2.0989	3.63995	3.39815	0.528722
KIAA0141	8.62641	18.309	7.20649e-08	0.592346	0.973155	4.52379	3.74104
BTN3A3	8.62431	21.9966	1.66058e-08	0.953429	1.55715	1.4511	0.195813
SERINC1	8.61895	9.21844	1.04061e-05	1.25931	2.15122	6.17144	4.46618
AKR1E2	8.5982	20.3656	3.25248e-08	1.00462	1.64723	0.42191	-0.904014
CEP85L	8.59658	8.68201	1.55926e-05	1.02511	1.76287	3.06995	1.67596
GXYLT2	8.59653	18.2279	7.85672e-08	3.14465	5.17643	0.465435	-3.69511
GATA2	8.59007	16.901	1.42999e-07	1.10172	1.81954	4.86054	3.39991
CLIC2	8.58838	20.6702	2.94218e-08	3.61615	5.9299	3.52844	-1.24458
KDM3A	8.58	15.6087	2.66769e-07	0.916007	1.51882	3.96494	2.74753
TRPS1	8.57912	21.0176	2.62051e-08	1.38623	2.27326	2.16729	0.337546
SFT2D2	8.57585	9.01925	1.24789e-05	0.869695	1.49263	5.26726	4.0861
PFKFB2	8.57163	17.2876	1.2376e-07	2.05047	3.38721	1.15597	-1.56287
MAFB	8.5631	20.9487	2.77466e-08	1.75245	2.87688	1.38644	-0.92822
STAT5A	8.56129	13.1439	9.75759e-07	1.11044	1.8589	3.85658	2.37191
KIAA1217	8.56107	19.7573	4.43597e-08	2.05684	3.38345	1.72779	-0.992357
PLEKHG3	8.56028	13.3485	8.73887e-07	1.65429	2.76719	3.13827	0.927536
TEAD3	8.55751	20.0801	3.92763e-08	2.16922	3.56715	1.00723	-1.86095
TXNDC15	8.55333	11.6208	2.35689e-06	0.646798	1.09111	3.64517	2.77622
RGL2	8.55224	14.1343	5.82123e-07	0.653294	1.09013	4.78624	3.91453
PXYLP1	8.53906	14.8449	4.12954e-07	1.23453	2.05684	0.191019	-1.45466
CDKL5	8.53541	10.9534	3.61283e-06	1.16934	1.98252	2.09461	0.518675
PSD4	8.53452	10.4809	4.86961e-06	3.78317	6.43415	0.681193	-4.42747
KAZALD1	8.53213	10.7688	4.0687e-06	2.3723	4.02757	1.3793	-1.82063
APBB3	8.53206	10.0156	6.60232e-06	1.49227	2.54686	1.96266	-0.0569076
LITAF	8.52812	21.0465	2.86055e-08	2.32831	3.82977	5.46734	2.3883
PCDHB14	8.52177	21.2114	2.72205e-08	3.02785	4.98114	0.532883	-3.47161
PHC3	8.51706	9.19717	1.16535e-05	0.852053	1.46563	4.21101	3.05216
PNMA8A	8.50696	21.1112	2.90892e-08	2.44429	4.02536	1.09704	-2.13779
DIXDC1	8.50203	10.9807	3.68901e-06	1.4605	2.48112	5.33002	3.35921
OBSL1	8.49432	11.5483	2.63938e-06	1.28552	2.17772	3.81739	2.08577
FAM120B	8.48846	12.422	1.60201e-06	0.983309	1.65898	3.52771	2.20657
CDKN2D	8.48344	10.5073	5.06225e-06	1.94274	3.31456	1.57419	-1.05445
LRIG3	8.48186	12.6986	1.3837e-06	1.31719	2.2204	5.38063	3.61184
BACH2	8.48092	16.9456	1.67402e-07	1.6448	2.73451	0.913002	-1.27665
IFI6	8.47729	7.87557	3.15419e-05	3.00973	5.26752	4.06869	-0.0699375
RBM23	8.47438	13.9348	7.19859e-07	0.391012	0.656158	4.00361	3.48003
RRAGB	8.4691	16.5875	2.0051e-07	1.06198	1.76843	1.5367	0.121495
NEDD4L	8.46454	21.9144	2.35522e-08	1.17078	1.93089	3.28892	1.73808
BPTF	8.4603	9.56822	9.56811e-06	0.814749	1.40221	5.15086	4.04238
AF117829.1	8.46017	8.74419	1.69099e-05	1.14961	1.99391	0.797669	-0.774089
SUGCT	8.45956	16.1863	2.44614e-07	1.26778	2.11459	-0.119126	-1.81031
DSTN	8.45224	11.6276	2.64784e-06	1.14883	1.95067	5.98682	4.43707
ARHGEF26	8.44958	17.4075	1.43827e-07	1.14372	1.90315	0.871665	-0.65177
TSPAN31	8.44466	11.8255	2.38025e-06	0.880562	1.49431	2.33117	1.14373
GALNT10	8.44136	13.3522	1.02295e-06	0.759801	1.2806	5.29404	4.27385
PSEN1	8.43765	9.3784	1.1125e-05	0.626272	1.08127	3.90339	3.04962
SH3PXD2A	8.434	15.1774	4.09733e-07	1.55977	2.61333	3.88199	1.79544
C5orf42	8.43205	10.3999	5.73096e-06	1.07062	1.83423	4.04921	2.59678
GLIS2	8.42477	17.959	1.18432e-07	1.36339	2.26949	2.04451	0.228069
ARL4D	8.41689	14.5724	5.65222e-07	1.59565	2.68157	1.5586	-0.580011
IL6	8.41644	17.2416	1.63409e-07	2.27325	3.79206	3.30325	0.270598
GTDC1	8.40988	10.2374	6.50885e-06	0.893067	1.53412	2.28985	1.07626
NXPH3	8.40873	12.5425	1.65745e-06	2.03945	3.4568	0.526993	-2.22113
RFX2	8.4025	12.4271	1.78135e-06	1.50638	2.55569	2.76623	0.735194
SPTAN1	8.40223	7.56787	4.25044e-05	1.52877	2.70137	8.29813	6.18306
FUT10	8.40176	11.8604	2.45797e-06	1.05589	1.79659	2.76695	1.34071
TMEM38A	8.39483	17.5619	1.47571e-07	1.35593	2.26332	0.643892	-1.16573
BMX	8.3944	12.0497	2.22568e-06	0.809171	1.37612	5.80795	4.71531
LMO4	8.39112	11.3437	3.367e-06	0.738617	1.26125	2.73666	1.73673
IL13RA1	8.38189	9.21173	1.31643e-05	1.13544	1.97087	5.53703	3.98388
RNF122	8.37614	20.9508	3.98338e-08	1.08967	1.8096	1.89743	0.447797
ACKR4	8.37305	12.7837	1.52062e-06	3.63968	6.17685	2.15484	-2.75342
CARNS1	8.36953	12.8052	1.50993e-06	2.08303	3.53556	0.648371	-2.16092
BRSK2	8.36345	9.79579	9.08861e-06	2.52527	4.36654	0.988502	-2.4574
CTSF	8.36305	17.7787	1.42098e-07	1.66435	2.78244	3.59785	1.37445
ARHGEF40	8.36287	19.679	6.60087e-08	1.6265	2.70905	3.42734	1.25957
PARD3B	8.36264	13.0766	1.31674e-06	0.93591	1.58738	2.9073	1.64565
CMIP	8.3582	10.3094	6.57582e-06	1.29547	2.23203	5.58054	3.81678
ZBTB22	8.35596	20.443	5.00041e-08	0.993807	1.65384	2.2782	0.954373
SETD2	8.35539	9.72952	9.5704e-06	0.520963	0.901811	4.56429	3.8529
SPRY1	8.35345	18.1745	1.22498e-07	1.61167	2.69376	2.32982	0.177103
HFE	8.34339	12.1609	2.22749e-06	1.03536	1.76579	0.932166	-0.468408
ZMIZ1	8.34108	9.80721	9.2338e-06	1.30667	2.26269	5.50107	3.71639
PLEKHH2	8.34023	15.1551	4.76944e-07	2.70657	4.56265	2.87232	-0.762287
CAMTA1	8.33261	21.2524	3.88785e-08	0.668108	1.11208	2.37365	1.48356
KALRN	8.33217	15.3287	4.44731e-07	1.54698	2.60784	3.86616	1.78875
KIF3B	8.32457	18.6215	1.07438e-07	0.347086	0.580671	4.01614	3.55226
AC093752.1	8.32279	16.552	2.58126e-07	0.686626	1.15425	0.456748	-0.463689
CCDC7	8.32132	10.0203	8.21912e-06	1.95185	3.37882	1.57185	-1.09349
HERPUD1	8.31617	20.9663	4.45362e-08	0.731148	1.21882	3.55992	2.58493
ZNF699	8.31582	13.4357	1.16112e-06	1.11326	1.89124	0.0582962	-1.44395
HDAC6	8.31569	18.0163	1.39673e-07	0.654186	1.09645	3.62789	2.75258
NF1	8.30539	11.8925	2.71685e-06	0.559522	0.958033	4.01975	3.26097
SLC30A3	8.30409	16.2539	3.03806e-07	2.89925	4.88356	2.24345	-1.64796
ARPIN	8.29391	15.8361	3.72939e-07	0.56165	0.947783	3.10873	2.35402
GPATCH2L	8.29225	21.9139	3.33556e-08	0.357468	0.595977	3.83353	3.3568
FUT11	8.29064	12.5809	1.89011e-06	0.483694	0.826179	3.92509	3.27015
SLC25A27	8.28008	18.4515	1.24537e-07	2.2224	3.73009	0.311655	-2.66459
SH3RF3	8.27896	11.123	4.37707e-06	1.04616	1.80245	3.49635	2.07205
AKAP2	8.27472	15.7544	3.98953e-07	1.45014	2.45079	-0.222937	-2.1734
SLC12A6	8.27011	12.7711	1.75247e-06	0.772616	1.32035	3.97689	2.9304
POR	8.26886	9.99113	8.85443e-06	0.789231	1.37155	4.28605	3.20566
FGGY	8.26763	15.9802	3.64143e-07	1.16634	1.97082	0.951815	-0.616763
ZFAND2B	8.2656	9.97299	8.98818e-06	0.79043	1.37414	2.44703	1.36475
SRSF5	8.26537	10.6672	5.84182e-06	0.804607	1.39169	5.45218	4.35403
ZNF543	8.25702	21.3095	4.42603e-08	0.530986	0.888075	1.43036	0.720834
PLXNA4	8.25394	16.339	3.17133e-07	1.59401	2.69328	6.18248	4.03884
MAF	8.24451	20.5848	5.88375e-08	3.49231	5.85232	1.8631	-2.80922
BRAF	8.24072	9.00243	1.74246e-05	0.742252	1.30392	3.35255	2.32946
TCEAL4	8.23963	9.06165	1.67588e-05	0.60451	1.06141	3.38175	2.54879
ZNF136	8.23143	17.1921	2.27678e-07	1.5282	2.58039	1.43184	-0.622461
ATAD2B	8.23043	10.5711	6.44174e-06	0.497264	0.862774	2.78011	2.10009
ZHX3	8.22091	11.9111	2.98594e-06	0.669012	1.15206	3.37297	2.46244
SDAD1P1	8.21976	19.837	8.12867e-08	0.903404	1.51829	-0.39277	-1.60362
MIA3	8.21877	11.0079	5.02608e-06	0.578954	1.0024	4.18799	3.39731
USP30	8.21646	18.1814	1.55399e-07	0.634104	1.06936	1.52412	0.672384
ANKAR	8.21567	11.0002	5.06724e-06	1.57165	2.7219	0.521812	-1.62497
GEM	8.21335	14.6091	7.48391e-07	2.47871	4.22157	0.492325	-2.85782
FOXJ2	8.20808	10.9868	5.15267e-06	0.885061	1.53376	3.31438	2.10497
SYNGR1	8.20402	11.2622	4.40781e-06	1.78485	3.0886	1.86845	-0.568267
FAXDC2	8.20077	8.67553	2.26406e-05	2.22322	3.93041	3.38303	0.306215
PLEKHA6	8.19829	16.7276	2.93276e-07	1.29835	2.19968	3.31662	1.56761
LRRC4B	8.19824	18.8562	1.22954e-07	3.01713	5.08726	0.847188	-3.20501
CYB5D2	8.19524	19.7831	8.68729e-08	0.973926	1.63963	2.45874	1.15196
EPM2A	8.18861	9.45925	1.35544e-05	0.900549	1.58107	0.893778	-0.347033
AGO4	8.18858	18.645	1.35878e-07	0.733885	1.23875	3.12975	2.14344
TCN2	8.18643	19.8838	8.50884e-08	1.03449	1.7423	4.99005	3.60165
OSTM1	8.18347	12.7059	2.03399e-06	1.17151	2.01461	2.89282	1.29977
KANK2	8.18055	8.11554	3.42036e-05	1.04872	1.86922	4.42576	2.96679
PDGFD	8.1801	9.83039	1.07755e-05	2.30919	4.04367	3.11771	-0.0587167
MLLT6	8.17668	11.7589	3.43468e-06	0.973635	1.68321	5.08585	3.75743
ERC1	8.17051	17.7615	1.99599e-07	0.828054	1.40204	4.34142	3.22637
SERINC5	8.16027	10.5829	6.92298e-06	0.757618	1.32096	2.60047	1.56118
TTC19	8.1595	12.3188	2.58094e-06	0.535254	0.923726	3.45263	2.72314
GPRASP2	8.15571	11.4921	4.09523e-06	0.920149	1.59552	2.06244	0.804605
IFIT3	8.14948	13.647	1.31349e-06	2.67082	4.58508	2.39895	-1.229
NFIX	8.14626	11.9151	3.27102e-06	1.59085	2.75379	4.1826	2.01028
G0S2	8.14361	11.546	4.03142e-06	5.28883	9.17575	1.44482	-5.78747
ARL4A	8.13287	10.5447	7.30689e-06	1.71253	2.99262	3.66807	1.31549
ZNF805	8.13078	10.7755	6.38446e-06	0.857527	1.49634	2.04055	0.863618
SCARNA7	8.12803	12.466	2.48469e-06	1.09686	1.89575	5.34393	3.84762
PNRC1	8.11637	16.7738	3.29506e-07	1.42385	2.42551	4.66145	2.73677
NME3	8.11607	17.2074	2.75089e-07	0.678474	1.15454	2.42239	1.50588
CYLD	8.11088	10.6273	7.1313e-06	0.735348	1.2863	3.29824	2.28742
FAM107A	8.10325	10.0338	1.03044e-05	2.5248	4.43866	4.66759	1.18586
ACP5	8.10149	21.6376	5.40436e-08	3.60504	6.08899	1.15159	-3.69542
RGS11	8.09994	9.05417	1.93353e-05	1.94749	3.4549	3.10726	0.406059
IMMP2L	8.09751	13.332	1.65397e-06	0.928026	1.60107	0.509968	-0.754581
MFAP2	8.09398	19.7429	1.06821e-07	1.66555	2.82339	4.0609	1.81643
MPHOSPH8	8.09231	10.2177	9.31658e-06	0.529004	0.929406	2.92664	2.19744
KBTBD7	8.09085	11.8214	3.69209e-06	0.953422	1.65778	0.66607	-0.639532
PDE4DIP	8.09031	9.86027	1.16378e-05	1.13621	2.00223	2.61456	1.04534
BCL2L2	8.0885	11.9531	3.44569e-06	0.677278	1.17698	3.07057	2.14344
OAS1	8.08721	12.6915	2.32854e-06	2.61209	4.52277	1.95989	-1.60754
TMEM87B	8.08715	17.8411	2.23631e-07	0.861437	1.46662	4.03606	2.87204
LINC01197	8.08504	13.9458	1.24284e-06	0.911981	1.57087	1.72674	0.485312
ST3GAL1	8.08366	16.6899	3.60505e-07	0.574539	0.981144	5.07068	4.29284
TTC17	8.08346	12.7049	2.32399e-06	0.679	1.17591	4.37945	3.45199
MR1	8.07612	19.5041	1.20622e-07	2.04118	3.46592	0.427638	-2.32591
XYLT1	8.07327	17.3688	2.77071e-07	1.57314	2.68384	1.99424	-0.134249
KLHDC2	8.06519	17.0261	3.23254e-07	0.641889	1.09662	2.68032	1.81107
UBA7	8.05886	20.5928	8.43251e-08	1.22146	2.0725	4.04178	2.3948
LRRCC1	8.05295	18.9257	1.56236e-07	1.32122	2.24954	1.037	-0.748381
CYR61	8.04821	13.1266	1.96356e-06	1.85791	3.21949	7.70198	5.16328
HINT3	8.04625	9.96897	1.14102e-05	1.11528	1.97001	2.0801	0.537452
SMIM3	8.03932	19.8774	1.12913e-07	1.67121	2.84297	1.01894	-1.23815
CHD9	8.03621	7.8955	4.55393e-05	0.975868	1.76385	5.18063	3.81077
ACTN1	8.02696	9.09255	2.02811e-05	0.784123	1.39819	7.71753	6.62637
A2M	8.02644	21.3095	7.03124e-08	3.02943	5.1457	3.21577	-0.871798
ARHGEF37	8.02115	15.1908	7.64779e-07	1.74252	3.00185	3.057	0.684811
ZNRF2	8.01851	13.2932	1.88196e-06	1.23622	2.14522	0.976392	-0.714333
BMP1	8.01301	17.6061	2.79613e-07	0.932261	1.59628	4.57191	3.30764
LRP5	8.00855	15.3219	7.35595e-07	1.20645	2.07936	5.04442	3.40151
TPBG	7.99579	9.66403	1.45493e-05	1.3236	2.35297	3.46013	1.62184
NHS	7.99297	19.3731	1.48031e-07	1.76378	3.01299	1.16503	-1.22336
DTX3L	7.98631	13.0554	2.21593e-06	1.18952	2.07119	3.64994	2.01959
HIF3A	7.98389	16.4939	4.62086e-07	3.1709	5.45598	3.16636	-1.14708
ZNF135	7.98274	17.6046	2.94996e-07	2.5666	4.40414	1.19465	-2.29072
STK33	7.98261	19.2966	1.55219e-07	2.191	3.74607	0.28106	-2.68747
HELB	7.9811	18.5582	2.04739e-07	1.09787	1.88009	1.6501	0.161123
WDR48	7.96632	15.3304	7.82973e-07	0.545591	0.943175	3.08182	2.33743
AUH	7.9635	20.3596	1.10311e-07	0.815439	1.39336	0.608766	-0.495633
SECTM1	7.96316	19.2892	1.61441e-07	2.18143	3.7349	0.565008	-2.39316
TMEM117	7.94387	17.13	3.81195e-07	1.49466	2.57487	0.273949	-1.76082
HELZ2	7.93641	8.58513	3.09965e-05	1.34226	2.42364	4.55158	2.66863
TRIM4	7.9353	17.9655	2.78739e-07	0.652965	1.12331	2.88594	1.9978
ZHX2	7.93201	12.0184	4.06303e-06	1.24869	2.19426	2.07218	0.350708
ALDH1A2	7.93199	19.7446	1.45475e-07	2.10768	3.61349	5.53452	2.67393
ID3	7.92568	11.3454	5.88874e-06	1.0041	1.77224	6.15971	4.77154
WWTR1	7.92363	9.06028	2.29842e-05	0.99686	1.79236	6.55891	5.1643
SERTAD4	7.92217	20.1493	1.2866e-07	1.80437	3.09336	2.31183	-0.137029
EHBP1	7.9209	11.4632	5.5528e-06	0.968909	1.70951	2.73935	1.40014
ZSCAN18	7.91524	19.3151	1.7508e-07	1.95158	3.35262	2.86346	0.211365
LRTOMT	7.91146	19.8802	1.44291e-07	1.00963	1.73305	-0.190197	-1.56154
IFIT1	7.91075	16.5489	5.10407e-07	4.07258	7.04341	1.7702	-3.78779
DNAH14	7.9104	14.5467	1.21249e-06	1.02763	1.7885	0.669958	-0.738104
MID1	7.90649	11.4268	5.76645e-06	0.980812	1.73279	4.35483	2.99803
PALMD	7.89523	11.2539	6.42875e-06	1.13693	2.0125	5.79934	4.22463
AC027290.2	7.89241	8.03703	4.69108e-05	1.70969	3.11957	2.62782	0.213192
AKAP11	7.88531	12.8329	2.84483e-06	0.78731	1.38259	4.33211	3.24715
MTMR11	7.8839	8.55744	3.32154e-05	1.31129	2.37839	2.18853	0.343691
AC092070.2	7.87914	21.0865	1.02061e-07	1.07712	1.84933	0.809211	-0.654016
IGFBP3	7.86695	11.5289	5.7309e-06	4.17763	7.39826	5.27683	-0.51112
FBXL20	7.86343	21.8131	8.3271e-08	0.927776	1.5929	3.33585	2.07551
KLF15	7.8612	12.3042	3.8403e-06	2.02357	3.56951	1.13081	-1.66574
SEMA4D	7.86054	9.87434	1.4804e-05	1.41737	2.54148	2.89213	0.912704
BMP4	7.85583	14.0666	1.63984e-06	1.4745	2.58132	5.55022	3.52231
RFTN2	7.85104	9.98274	1.40202e-05	1.33288	2.38956	2.0777	0.216483
ZNF529	7.84976	20.5226	1.30636e-07	0.839459	1.44572	1.45667	0.314075
SLC9A9	7.83948	8.58451	3.40616e-05	1.95935	3.56541	0.856823	-1.90556
FAM221A	7.83526	20.9193	1.17861e-07	1.25176	2.15662	-0.0391061	-1.7433
NAP1L2	7.83196	20.5955	1.32088e-07	2.04543	3.52678	0.114183	-2.67192
GULP1	7.81965	12.2505	4.17044e-06	1.61161	2.85269	3.29498	1.06284
KAZN	7.81652	16.4519	6.22014e-07	1.33132	2.31915	1.71667	-0.108562
ZNF467	7.81527	17.0316	4.94756e-07	1.72563	3.00163	2.6176	0.25397
IL16	7.80745	14.5348	1.42528e-06	2.3472	4.11683	0.718297	-2.51372
RND1	7.80391	21.8373	9.3556e-08	2.83302	4.88494	1.4899	-2.36908
SCNN1D	7.80361	13.2184	2.63817e-06	1.31359	2.317	0.260779	-1.55452
ZNF677	7.80344	15.408	9.80029e-07	0.888147	1.55354	1.61895	0.398111
SIGIRR	7.79454	16.3391	6.75539e-07	0.881779	1.53908	2.90656	1.69614
P4HTM	7.79196	16.5027	6.35177e-07	0.671767	1.1722	2.6501	1.72812
ARID4B	7.78828	11.1331	7.82949e-06	0.655192	1.17034	3.68786	2.7751
IER3	7.78555	16.9062	5.47092e-07	1.62822	2.83943	5.93309	3.69927
AGRN	7.78393	10.5487	1.08926e-05	1.4724	2.64185	6.90166	4.84454
PARVA	7.77968	8.12917	4.8872e-05	0.501595	0.922573	5.16921	4.45713
TEAD1	7.77416	10.4918	1.13791e-05	0.762605	1.36995	4.47665	3.41037
MAP3K13	7.77024	10.4111	1.19687e-05	0.740709	1.33186	2.0915	1.05522
STON1	7.76974	15.1195	1.1697e-06	1.20864	2.12158	2.1337	0.468592
BST2	7.76588	21.8908	9.96288e-08	2.25702	3.90236	3.95119	0.871498
CFAP44	7.75713	20.0189	1.85868e-07	1.43648	2.49311	0.9916	-0.973195
NFKB2	7.75666	13.3497	2.64882e-06	1.13002	1.99927	3.7444	2.17975
LRMDA	7.74829	21.7387	1.08384e-07	1.73954	3.01227	0.557001	-1.81891
SCARA3	7.74495	12.0191	5.17953e-06	1.10135	1.96337	6.16955	4.63719
ZBTB4	7.72669	11.9367	5.5334e-06	0.622401	1.11167	4.59398	3.72695
DDX17	7.7151	11.1478	8.49845e-06	0.483813	0.869173	7.35677	6.68028
C2orf88	7.71456	20.7219	1.60432e-07	2.83979	4.93823	1.42321	-2.46581
ZNF141	7.71279	21.4077	1.29419e-07	0.813428	1.41307	1.32693	0.213683
ZNF836	7.70512	15.0799	1.3176e-06	1.06391	1.8771	0.769054	-0.701448
PRX	7.70187	12.9005	3.54578e-06	1.41159	2.51341	0.808466	-1.15403
FCGRT	7.69904	16.6861	6.91939e-07	1.21365	2.13171	5.44325	3.77057
PJA2	7.69684	8.5665	3.9631e-05	0.781376	1.43904	5.05894	3.94873
TNIP1	7.69474	16.0025	9.14293e-07	0.81082	1.42746	4.94118	3.82204
LRRC1	7.69438	11.6718	6.61434e-06	1.33792	2.39958	2.69753	0.82878
TFDP2	7.69266	10.1369	1.5309e-05	1.01371	1.83826	3.27229	1.8463
ZNF91	7.69227	8.72295	3.60105e-05	1.14334	2.10253	2.4756	0.852666
SIN3A	7.69038	9.11431	2.82223e-05	0.561878	1.02893	3.99734	3.20193
LINC01278	7.68735	15.5268	1.12406e-06	0.940176	1.65861	1.16855	-0.130839
CPLX1	7.68388	21.8621	1.19436e-07	2.61683	4.55254	1.04635	-2.53833
PATJ	7.68208	18.0086	4.33127e-07	1.37798	2.41535	1.19882	-0.697844
GSE1	7.67963	8.82983	3.40828e-05	1.25917	2.31514	3.76192	1.97476
IGFBP7	7.67839	9.10996	2.86538e-05	1.19065	2.18265	6.66576	4.97911
GCH1	7.67669	11.1392	8.95279e-06	1.57491	2.8383	1.08822	-1.11839
DUSP22	7.6757	13.1844	3.21422e-06	0.711266	1.26737	3.26323	2.27391
KAT6B	7.67487	9.69517	2.01994e-05	1.06985	1.95043	2.89735	1.38721
NFE2L2	7.67008	15.6744	1.08807e-06	1.05834	1.8687	4.22679	2.76327
CRISPLD1	7.65982	13.7813	2.49679e-06	1.83106	3.2582	2.43908	-0.105553
KMT2E	7.65742	10.72	1.15015e-05	0.890912	1.61288	4.84822	3.59632
FOXO4	7.65331	8.72997	3.72804e-05	1.72833	3.18853	2.82937	0.370942
FBXO38	7.65287	13.8548	2.44023e-06	0.341467	0.607759	3.55346	3.07885
TMX4	7.65023	12.213	5.3254e-06	0.862101	1.54686	4.0289	2.82442
ZNF528	7.64844	21.7998	1.31165e-07	0.964664	1.68294	1.65964	0.335831
LTBP2	7.64161	9.62296	2.18638e-05	2.00566	3.66914	9.6548	6.8174
PCDHGB7	7.6377	21.859	1.31787e-07	1.4575	2.5446	2.33519	0.334143
LLGL2	7.62557	16.8409	7.40032e-07	1.30077	2.29687	2.08291	0.284087
NRG3	7.62556	15.688	1.16404e-06	1.49267	2.64472	3.1902	1.1215
CNNM2	7.62512	8.62414	4.10109e-05	1.45031	2.68549	1.76015	-0.307756
KANK3	7.62486	19.6693	2.7081e-07	1.61413	2.83171	3.74413	1.52121
OAS2	7.61717	16.1663	9.75138e-07	3.28491	5.81549	2.67128	-1.87892
ZFP36L2	7.61576	14.4868	1.95347e-06	1.30458	2.32298	4.68074	2.86696
ANKRD42	7.61419	13.7907	2.66012e-06	0.809554	1.44574	1.22908	0.101431
PCF11	7.60651	10.1133	1.71236e-05	0.532361	0.972507	4.2668	3.51437
PITPNC1	7.60466	11.7359	7.18767e-06	1.06892	1.93041	2.45274	0.953076
ZBTB37	7.60363	15.94	1.091e-06	0.911975	1.61738	2.71063	1.44595
IQSEC1	7.60279	8.15999	5.65711e-05	0.970524	1.81146	3.46426	2.07327
HTRA1	7.60132	21.9526	1.38407e-07	1.35017	2.36351	5.75589	3.89905
PKHD1L1	7.59911	19.6681	2.84931e-07	4.51407	7.93507	2.76442	-3.46015
CTBS	7.59859	12.6526	4.61077e-06	1.1026	1.98206	1.21759	-0.324741
MKNK2	7.59771	21.8274	1.4479e-07	0.879687	1.54064	5.71349	4.50332
PHF2	7.59326	7.89833	6.79053e-05	0.769539	1.44297	3.82327	2.71702
SHC2	7.59293	21.5743	1.57854e-07	1.61225	2.82582	2.8172	0.598166
ZNF582	7.59173	16.2037	1.00306e-06	0.885676	1.57097	-0.189923	-1.41824
IFI44	7.58827	9.34541	2.732e-05	1.75415	3.23236	2.73535	0.242093
NOD1	7.5862	15.5368	1.32008e-06	0.937932	1.66787	3.98514	2.68223
KLF3	7.579	7.89069	6.91624e-05	1.2068	2.26599	5.02977	3.29337
SAP30L	7.57638	10.0985	1.78753e-05	0.788245	1.4438	3.06584	1.94982
NEMP2	7.57637	21.5324	1.65525e-07	0.949926	1.66722	0.385751	-0.922821
CYTH1	7.57613	10.8364	1.1914e-05	0.706845	1.28722	3.95981	2.96278
BICRAL	7.57265	8.72328	4.06153e-05	1.10485	2.05267	2.81305	1.23429
DOPEY1	7.57036	13.9606	2.63343e-06	0.758392	1.35821	3.03146	1.97316
CRTC1	7.56825	9.90737	2.01113e-05	1.22402	2.24728	1.89521	0.15956
KLHL20	7.56661	9.64664	2.34187e-05	0.875206	1.61096	3.47785	2.23477
IL33	7.56603	21.9044	1.51343e-07	3.1086	5.45707	5.01651	0.733673
NORAD	7.56444	11.9732	6.72659e-06	0.738075	1.33548	6.25977	5.223
STX7	7.55758	11.6994	7.78481e-06	0.710151	1.28779	3.84789	2.84892
TNRC6B	7.55579	8.39201	5.09323e-05	0.764342	1.42805	4.96638	3.87018
STK38L	7.54781	9.37497	2.80404e-05	1.5671	2.89689	4.40228	2.17029
PLEKHO2	7.54339	9.47954	2.64905e-05	1.04202	1.92496	4.17089	2.6874
ALPL	7.54137	9.92658	2.05083e-05	4.1013	7.54601	0.790324	-5.03333
AMOT	7.53896	18.8408	4.22177e-07	1.17881	2.08564	2.1063	0.474073
SYS1	7.53842	12.4312	5.57098e-06	0.559572	1.01208	2.9562	2.17037
RNASET2	7.53285	9.70431	2.35148e-05	1.97005	3.63476	1.46105	-1.34135
PPARA	7.52972	21.9138	1.63057e-07	0.870602	1.53268	2.42817	1.22653
POLR3GL	7.52377	15.5683	1.44422e-06	0.783821	1.40073	1.14429	0.0520105
FKBP9	7.51757	20.4923	2.57282e-07	0.775436	1.36977	4.53331	3.46071
THADA	7.51422	16.7552	9.28001e-07	0.441695	0.787095	3.1753	2.5609
ATG2B	7.51341	12.9421	4.53417e-06	0.427084	0.772028	3.87277	3.27322
MXRA8	7.5129	9.52265	2.67089e-05	2.0475	3.79085	1.22657	-1.69261
SPNS2	7.49679	12.706	5.1812e-06	0.846286	1.53377	4.64399	3.45396
CD47	7.49417	12.4915	5.75334e-06	1.15882	2.10303	4.39567	2.76475
UBN2	7.49408	8.40898	5.35457e-05	0.787042	1.47823	3.10247	1.96983
ZNF518A	7.49246	12.4631	5.84514e-06	1.09261	1.98345	2.73672	1.19869
PDE9A	7.49032	17.6643	6.95265e-07	2.72511	4.85378	1.12838	-2.66107
MALT1	7.48248	17.9422	6.39528e-07	0.957483	1.70531	2.52141	1.19001
LINC00654	7.47826	17.6445	7.1573e-07	2.00585	3.57637	0.811709	-1.9794
ZNF626	7.47396	14.6937	2.23367e-06	1.14877	2.06774	0.561129	-1.04713
ARHGEF11	7.47334	10.6147	1.5202e-05	0.43004	0.791353	4.31059	3.69989
CCND2	7.46123	20.6167	2.77722e-07	1.56886	2.78327	6.23236	4.0563
HECTD2	7.4586	13.512	3.79318e-06	1.06189	1.92321	2.12253	0.62998
NEK9	7.45785	12.4548	6.15607e-06	0.736314	1.34065	3.8555	2.81702
IGFBP4	7.45552	19.0463	4.62617e-07	1.30245	2.31894	6.38746	4.57676
ARHGAP31	7.45345	10.0354	2.13393e-05	0.455366	0.843448	5.51289	4.86348
TAPBP	7.453	16.8977	9.80234e-07	0.695724	1.24551	5.05525	4.08463
LINC02035	7.4525	16.4328	1.16567e-06	1.12127	2.0101	0.603541	-0.962142
PLBD1	7.44881	15.0855	1.98103e-06	3.28044	5.90852	0.685923	-3.90856
PDGFC	7.4478	8.35004	5.81802e-05	0.928749	1.75308	1.81703	0.476115
ADAMTS1	7.4465	20.9176	2.6126e-07	2.32756	4.13197	6.8664	3.63664
CXCL11	7.4446	15.1949	1.9088e-06	2.51139	4.5232	0.489923	-3.02737
S100A4	7.44184	9.10844	3.68003e-05	2.77643	5.19526	0.697219	-3.28863
FAM198B	7.43484	12.8842	5.20818e-06	1.21615	2.21368	6.17741	4.4625
RASSF5	7.43432	8.25806	6.2491e-05	2.66496	5.04285	1.05634	-2.79756
HEATR5B	7.43253	12.6011	5.95442e-06	0.32054	0.584432	3.52669	3.0742
FRYL	7.42743	15.5309	1.71866e-06	0.461574	0.831563	4.75934	4.11277
ZNF219	7.41406	16.6827	1.13588e-06	1.30489	2.34507	2.27094	0.445953
NPDC1	7.41306	8.33708	6.07086e-05	1.08691	2.05852	5.81098	4.23827
TAPT1	7.41051	14.1558	3.08841e-06	0.932306	1.69068	2.15841	0.846915
TMEM127	7.40159	21.5633	2.37234e-07	0.433299	0.771184	4.35792	3.75568
RNF13	7.40111	9.38973	3.26211e-05	1.2279	2.29916	3.23088	1.46735
ZNF585A	7.40086	15.6408	1.72109e-06	1.5294	2.76049	0.375242	-1.7697
TMEM184A	7.39752	9.15003	3.76527e-05	2.38277	4.47449	1.03614	-2.39249
MIR99AHG	7.39255	8.84354	4.54116e-05	1.57003	2.95998	2.25906	-0.00594509
A4GALT	7.38787	12.7015	6.05374e-06	1.1528	2.10887	1.94995	0.319116
RSF1	7.38547	8.56699	5.41103e-05	0.613433	1.16123	4.08056	3.19323
DISP1	7.38507	14.9208	2.34628e-06	0.922866	1.67219	0.266897	-1.03063
HES1	7.38452	17.9459	7.65688e-07	1.62783	2.92277	4.66425	2.38895
SPATA6	7.38226	16.0726	1.50593e-06	1.0023	1.80943	0.389172	-1.01669
ZXDC	7.38093	9.85722	2.56118e-05	0.612611	1.14391	2.99294	2.11468
HERC2P2	7.37572	11.9056	8.94679e-06	1.48548	2.73262	4.44006	2.33101
MGEA5	7.36902	14.5708	2.77379e-06	0.468066	0.850408	4.81471	4.15547
POU6F1	7.36853	14.732	2.59991e-06	0.96757	1.75692	1.49863	0.136385
MEF2D	7.36412	11.5399	1.08555e-05	0.893812	1.6497	4.19566	2.9239
SYNE3	7.3616	9.72472	2.81887e-05	0.95919	1.79645	4.41271	3.03489
ALDH5A1	7.36028	13.6845	4.07487e-06	2.2869	4.17355	0.996176	-2.23405
SEMA6D	7.35953	21.8333	2.40239e-07	1.38574	2.47383	2.9973	1.06752
BRWD1	7.35597	14.497	2.9184e-06	0.769098	1.39932	4.34317	3.25896
PIP5K1C	7.35452	8.84877	4.71083e-05	1.08697	2.05634	4.93299	3.36134
GAB3	7.35202	9.27289	3.68253e-05	0.759452	1.43017	1.32881	0.233995
TNRC6C	7.35142	8.39226	6.23708e-05	1.0013	1.90586	3.43256	1.97898
DENND6B	7.35017	16.5324	1.34226e-06	1.35521	2.44976	0.496957	-1.40553
FCHSD2	7.35016	13.4702	4.53814e-06	0.8993	1.64426	3.67942	2.40764
ZMYND11	7.34873	8.27909	6.70975e-05	0.395376	0.753913	4.03811	3.46346
RAD51B	7.33768	10.5212	1.88354e-05	0.672599	1.2536	0.51047	-0.452629
LGALS9	7.33585	13.5642	4.45185e-06	1.79103	3.27735	3.20055	0.66636
ETV3	7.3345	8.76419	5.06004e-05	0.612018	1.16117	3.22693	2.34034
GOLGA1	7.33366	16.7407	1.28138e-06	0.459427	0.831151	2.85015	2.20486
SKI	7.33302	11.3819	1.22215e-05	1.27603	2.36416	5.19538	3.37529
BTRC	7.33023	9.83074	2.75491e-05	0.439598	0.824844	2.94843	2.31621
ANKRD6	7.3283	12.8377	6.19552e-06	1.18954	2.18589	1.25939	-0.428326
FBXL14	7.32679	11.3314	1.26324e-05	0.651116	1.20745	1.94533	1.01605
MCC	7.32546	11.5522	1.13528e-05	0.745494	1.38058	4.88572	3.82268
C22orf39	7.32208	11.2803	1.30357e-05	0.362674	0.673075	2.0188	1.50093
EMILIN2	7.32172	11.1129	1.41788e-05	1.63715	3.042	2.7478	0.408223
ZSCAN30	7.31962	17.0793	1.16466e-06	0.632054	1.14373	2.14083	1.25294
FBXL5	7.3184	8.05939	7.93627e-05	0.910905	1.74748	4.18676	2.85757
WSCD1	7.31578	16.0618	1.69434e-06	0.616656	1.11962	5.05377	4.18563
FXYD6	7.31433	16.632	1.37876e-06	3.80518	6.89761	3.2284	-2.123
GALNT15	7.31151	17.978	8.67821e-07	3.40583	6.15266	3.39488	-1.38436
CELSR2	7.30589	20.0318	4.55548e-07	1.08151	1.94576	0.965066	-0.548567
WBP1	7.3022	16.2962	1.59089e-06	1.24966	2.26992	0.961079	-0.798709
APPL2	7.30172	20.414	4.09587e-07	0.531435	0.955741	2.57153	1.82794
TLE2	7.2952	13.5061	4.85127e-06	1.00119	1.83911	3.52299	2.10284
BIRC3	7.29448	17.4453	1.07327e-06	2.83575	5.13738	1.85843	-2.12813
ARRDC3	7.28653	8.84627	5.06788e-05	1.83884	3.50105	5.86293	3.19298
MOB3C	7.28281	21.3669	3.23047e-07	0.963815	1.73312	2.15852	0.810051
NAP1L5	7.28149	14.3034	3.55151e-06	0.991222	1.81665	0.661522	-0.742413
F11R	7.27666	19.938	4.97264e-07	0.91359	1.64808	5.3118	4.03097
MCM9	7.27188	15.5595	2.20362e-06	0.424463	0.774912	1.75965	1.15996
BATF2	7.27026	9.56698	3.4139e-05	2.33889	4.42447	1.4771	-1.90459
CEP70	7.26581	11.4816	1.27105e-05	0.794537	1.48005	1.54956	0.41226
ZNF76	7.2627	11.654	1.17461e-05	0.677305	1.2606	2.78544	1.81649
PRR15	7.25244	17.7562	1.04374e-06	2.65989	4.83244	1.00185	-2.74431
ATP2B1	7.24703	9.67123	3.30902e-05	1.02802	1.9469	4.1077	2.62024
SMARCD3	7.246	12.8989	6.78998e-06	0.94917	1.7565	1.92707	0.574236
SPTLC2	7.24586	10.4951	2.13596e-05	0.622636	1.17054	5.65097	4.75438
PDE6B	7.24167	20.2132	4.91763e-07	1.24927	2.25921	-0.206929	-1.96117
MEIS2	7.23185	18.6172	8.19019e-07	0.965277	1.75313	3.19198	1.83278
PPCS	7.22408	18.4869	8.6675e-07	0.397891	0.723362	1.96358	1.40295
CCDC102A	7.22344	11.999	1.05276e-05	1.107	2.06325	1.97123	0.386103
SECISBP2	7.22208	12.0146	1.04711e-05	0.446482	0.832189	3.37007	2.73074
ZNF737	7.222	11.1427	1.58795e-05	0.862001	1.61603	0.621594	-0.617422
MGA	7.2132	18.8677	7.84477e-07	0.386207	0.702166	4.4001	3.85591
RAB11FIP2	7.21269	18.1956	9.73087e-07	0.659134	1.20035	1.92312	0.993375
DHRS13	7.20627	9.93888	3.00076e-05	1.33051	2.52298	0.111435	-1.81531
CNNM3	7.20082	11.1043	1.66304e-05	0.802762	1.50837	2.00306	0.847496
CERS5	7.19896	16.7249	1.63711e-06	0.439971	0.805417	3.18227	2.55958
NAALADL1	7.19855	18.581	8.83548e-07	1.2222	2.22646	0.884272	-0.84006
BABAM2	7.19464	12.0297	1.07989e-05	0.640176	1.19613	2.10698	1.18882
KCTD12	7.19382	9.36712	4.15845e-05	1.42846	2.72761	7.23334	5.15531
MECP2	7.19365	8.03562	9.09882e-05	0.527193	1.02409	4.1312	3.35556
MIF4GD	7.18632	21.8658	3.46218e-07	0.658775	1.19351	1.37498	0.448842
MICU1	7.18592	20.443	5.15766e-07	0.420005	0.762911	3.5893	2.99785
CALCRL	7.18448	9.25418	4.47581e-05	1.55772	2.98079	7.74228	5.47302
ASAH1	7.18109	8.75375	5.98161e-05	1.49526	2.87922	3.23058	1.04334
SLC27A1	7.17628	15.4813	2.66535e-06	1.0589	1.95024	2.75067	1.2461
CPD	7.17135	12.307	9.83146e-06	0.636196	1.18929	5.74943	4.83669
UNC93B1	7.16977	14.0412	4.70596e-06	0.695967	1.28985	1.52613	0.533226
ARHGEF25	7.16048	19.0347	8.26014e-07	1.38526	2.52938	1.30746	-0.649857
POF1B	7.15545	19.6445	6.938e-07	4.23011	7.71699	1.99062	-3.98293
ZCCHC14	7.15233	9.63604	3.76055e-05	0.993567	1.89945	3.73387	2.28735
CAVIN2	7.14686	13.2962	6.6252e-06	0.978893	1.82435	6.65087	5.24925
GALNT11	7.14143	15.4863	2.82176e-06	0.437552	0.808411	3.0796	2.45662
FRAS1	7.14033	19.3165	7.89051e-07	1.8598	3.39984	3.75653	1.12671
KANSL1	7.13088	8.87408	5.88678e-05	0.569141	1.0997	4.05664	3.22221
PIAS2	7.13059	8.97284	5.56607e-05	0.368794	0.711751	2.50057	1.9603
BLCAP	7.1285	9.33272	4.56072e-05	0.587286	1.12898	4.42183	3.5637
SYT17	7.12721	15.2731	3.12773e-06	1.67188	3.09534	0.694515	-1.68909
ZNF333	7.11723	21.4087	4.55038e-07	0.56072	1.02291	2.00193	1.21011
STIM1	7.11656	15.796	2.62977e-06	0.541971	1.00254	3.43922	2.66696
VCAM1	7.11616	20.9256	5.20705e-07	3.60209	6.57763	3.03648	-2.05338
ZNF350	7.11264	16.3153	2.20192e-06	0.616823	1.13946	0.685278	-0.192862
ERCC6L2	7.10877	10.2611	2.84904e-05	0.601356	1.14768	2.84578	1.97126
FRG1HP	7.10743	21.3723	4.69338e-07	0.845374	1.54366	0.422187	-0.77233
PDK4	7.10115	18.1574	1.21849e-06	1.87975	3.45797	2.20101	-0.467847
CHD6	7.10109	20.3171	6.37587e-07	0.740998	1.35654	4.29593	3.24716
ARL4C	7.09975	10.3032	2.81919e-05	1.30178	2.48569	2.09078	0.197048
ZNF345	7.09961	17.8992	1.32679e-06	1.01757	1.87341	0.246279	-1.19921
APCDD1	7.0963	21.8487	4.23207e-07	1.57636	2.87893	0.135209	-2.09244
NFIL3	7.09	7.7602	0.00011947	1.45676	2.87243	2.44696	0.282363
LTBP1	7.08807	12.2347	1.14193e-05	1.68426	3.17468	6.35753	3.92806
ZNF483	7.08578	8.15608	9.40826e-05	1.60151	3.13922	0.772278	-1.59809
JPH3	7.08474	14.6769	4.20015e-06	1.8539	3.4538	0.440894	-2.21296
ZNF596	7.08467	8.9925	5.78706e-05	1.33139	2.58069	0.658179	-1.29786
DNPEP	7.08191	13.9517	5.59733e-06	0.454742	0.850024	3.04054	2.38815
RIMKLB	7.07643	10.2964	2.91107e-05	0.939531	1.7982	4.35062	2.98176
KLF8	7.07065	20.4267	6.58571e-07	2.15751	3.95982	2.2023	-0.856368
TTC21A	7.06824	9.34434	4.85041e-05	1.18911	2.29933	1.19761	-0.54661
ZBTB43	7.06623	16.4695	2.26643e-06	0.349133	0.64741	1.68446	1.18619
MKLN1	7.06473	10.1881	3.12035e-05	0.694794	1.33262	3.94122	2.92752
H1FX	7.06466	7.94793	0.000109034	0.73234	1.44332	3.90253	2.8147
ADAMTS13	7.06464	16.5186	2.23494e-06	1.4022	2.60012	0.237096	-1.76406
TNFRSF1A	7.06212	14.4801	4.69802e-06	0.675236	1.26165	5.47672	4.50828
AHR	7.05039	13.9341	5.92231e-06	0.702638	1.31743	3.42865	2.41862
MAFK	7.04949	9.89941	3.6882e-05	1.49537	2.8803	4.358	2.17017
TCP11L2	7.04469	10.7724	2.39035e-05	2.06034	3.93983	3.51309	0.513003
PSMB9	7.04298	19.2831	9.6834e-07	1.94991	3.59656	0.392573	-2.38066
IQSEC2	7.042	11.7196	1.53512e-05	1.0003	1.90007	1.55058	0.100396
HKR1	7.04163	14.61	4.62197e-06	0.594183	1.11176	2.67267	1.8197
SNTB2	7.03706	8.63859	7.44862e-05	0.6843	1.33884	6.01623	5.00466
DOK5	7.02748	20.8543	6.40867e-07	1.99729	3.67725	1.5672	-1.27006
ZNF292	7.02154	12.8764	9.52633e-06	0.797906	1.50811	3.89244	2.73943
AGPAT4	7.0177	18.2426	1.39281e-06	0.707641	1.31156	2.84558	1.83598
RASGRP2	7.01762	14.5802	4.86111e-06	2.30409	4.32154	0.822816	-2.49
THNSL2	7.0158	21.0049	6.30773e-07	3.41986	6.30137	0.552352	-4.30826
EZH1	7.01183	14.7697	4.57036e-06	0.722867	1.35551	3.3415	2.30231
CD81	7.01013	9.54301	4.65856e-05	0.95294	1.8495	6.06204	4.66082
ANKS1A	7.0069	21.8145	5.19355e-07	0.423781	0.78035	3.35492	2.75285
ZCCHC11	7.00503	17.917	1.57903e-06	0.457528	0.849724	3.15568	2.50205
ODF3B	7.00299	11.5985	1.71095e-05	1.73465	3.31032	0.362555	-2.15993
EFEMP1	6.9998	9.98261	3.74973e-05	0.709427	1.37219	9.72108	8.68027
BTBD7	6.99517	10.0781	3.59157e-05	0.592085	1.14472	4.09694	3.22854
ZNF891	6.99258	12.28	1.28189e-05	0.87097	1.65652	0.944479	-0.319267
RING1	6.98835	9.07749	6.13916e-05	0.731784	1.43097	2.53887	1.45749
ZNF783	6.98433	11.3388	1.97685e-05	0.67014	1.28358	1.95435	0.977484
ICA1	6.98004	21.2945	6.30632e-07	0.613864	1.13425	2.8257	1.95164
PTPRM	6.97939	17.8171	1.71067e-06	0.839553	1.56343	4.89403	3.69254
HEIH	6.97406	10.6057	2.83645e-05	0.583659	1.12553	1.15597	0.301375
MIDN	6.97151	9.56625	4.81291e-05	1.62291	3.16148	5.17136	2.77917
SERPINB1	6.96753	8.48791	8.74138e-05	1.23054	2.43005	4.05036	2.22006
VILL	6.96504	17.8042	1.76511e-06	0.616908	1.15042	1.71623	0.832565
SYNGAP1	6.96358	10.0868	3.71584e-05	1.08276	2.09994	3.16915	1.5778
MST1	6.95703	13.3358	8.68981e-06	0.992851	1.88388	0.635221	-0.803147
COQ8A	6.95532	10.5573	2.97376e-05	0.722251	1.39601	1.85748	0.798348
CDK19	6.94843	17.2917	2.14058e-06	0.773532	1.44687	2.09969	0.989489
PDE4B	6.94804	11.1307	2.28513e-05	1.1434	2.20146	6.14577	4.47334
ARHGAP4	6.94366	14.9365	4.81292e-06	1.0161	1.9167	3.64597	2.17957
RUNX1T1	6.93804	12.1109	1.49093e-05	1.38831	2.65759	4.53039	2.50744
DCLK1	6.93702	21.4969	6.56843e-07	2.28219	4.23243	1.47004	-1.78727
CBFA2T2	6.9367	9.80545	4.42884e-05	0.913678	1.78184	2.33058	0.982818
GPER1	6.93558	15.0387	4.70121e-06	1.3634	2.57282	1.62801	-0.340098
JAG1	6.93221	12.215	1.43722e-05	0.680362	1.30231	5.56742	4.57608
KDM6B	6.92996	12.7106	1.16897e-05	1.40094	2.67433	3.57223	1.53459
PCDHGA10	6.92806	18.1216	1.71865e-06	1.05647	1.97545	1.02454	-0.491424
PLCD4	6.92568	8.65341	8.32011e-05	1.07943	2.13621	1.338	-0.26982
LYRM1	6.92275	11.9927	1.60397e-05	0.708936	1.36021	3.067	2.03243
COX7A1	6.92254	16.4965	2.90627e-06	1.64508	3.09227	2.02857	-0.340104
TBC1D19	6.91655	21.9138	6.17938e-07	0.475287	0.882502	0.367839	-0.311055
IL1RAP	6.91156	8.9175	7.2979e-05	1.09713	2.16699	1.99135	0.359294
VAMP4	6.90178	9.06348	6.81456e-05	1.22379	2.41527	1.91862	0.0990942
DKK3	6.89585	9.91436	4.40112e-05	1.85761	3.63415	6.96267	4.21679
RHBDD2	6.89313	11.784	1.83198e-05	0.49381	0.951618	3.16198	2.43927
RSBN1	6.88977	15.1646	4.856e-06	0.557043	1.05541	2.25942	1.45319
C10orf128	6.88587	16.1669	3.46329e-06	1.77753	3.35691	1.86282	-0.704404
DNAJB9	6.87952	13.1527	1.0526e-05	1.11439	2.13295	2.11785	0.494182
ARNT	6.87948	11.0669	2.5776e-05	0.484723	0.940302	3.78185	3.06934
TMEM167B	6.87697	8.42265	9.98303e-05	0.811441	1.61954	3.0194	1.80391
ANKH	6.87672	9.6674	5.10541e-05	0.831852	1.63483	3.04108	1.80774
C1orf115	6.87244	14.518	6.31055e-06	0.696437	1.32528	3.79457	2.78371
NXF1	6.86875	9.29108	6.26584e-05	0.527096	1.04112	4.28084	3.49673
GJA5	6.86304	21.8532	7.06289e-07	2.6094	4.87059	4.8135	1.07351
PRKCZ	6.8621	16.5369	3.19967e-06	3.24703	6.13902	1.90242	-2.7906
CAP2	6.86128	18.706	1.64743e-06	2.2797	4.28412	0.84557	-2.43634
BCL6	6.86067	8.76121	8.40933e-05	1.17541	2.33907	2.78444	1.02719
WDR7	6.85912	11.9434	1.79261e-05	0.446221	0.861997	2.59085	1.93674
CRIM1	6.85876	8.67074	8.85809e-05	0.834447	1.66292	8.52727	7.27858
ABAT	6.85578	18.9528	1.55157e-06	1.17543	2.20879	0.700894	-0.991217
DSP	6.85502	19.1137	1.48449e-06	4.03782	7.58523	3.34542	-2.46611
ZCCHC6	6.85456	13.1604	1.09008e-05	0.468374	0.898707	3.4945	2.81096
STAT6	6.85217	14.0974	7.62217e-06	0.467496	0.893096	5.53954	4.85924
CRELD1	6.85158	12.1145	1.68377e-05	0.828562	1.60006	3.42957	2.21526
OSBPL2	6.84294	11.1459	2.61e-05	0.602761	1.17302	3.24258	2.35469
CCDC40	6.84182	18.0771	2.05855e-06	1.27261	2.40002	-0.102083	-1.93839
SELL	6.8397	8.74863	8.66432e-05	2.54743	5.08181	2.57639	-1.23823
DYNC1I1	6.83663	21.6643	7.84722e-07	1.73891	3.25523	0.72136	-1.77571
HDAC4	6.83515	8.65281	9.17868e-05	0.742599	1.48407	2.82975	1.71642
MPZL3	6.83422	14.1521	7.68793e-06	0.726623	1.39031	1.86498	0.806508
UBXN7	6.83384	10.3641	3.80746e-05	0.534132	1.04731	3.91184	3.12112
UBE2L6	6.83293	21.9844	7.31145e-07	1.31694	2.46479	2.97411	1.08325
PLA2R1	6.82759	20.7249	1.01582e-06	0.994747	1.86716	3.99184	2.56088
TMEM140	6.82698	17.6982	2.37331e-06	0.691475	1.30734	1.96413	0.964726
KCNJ12	6.82689	21.9929	7.39525e-07	1.03834	1.94447	0.723508	-0.767896
PPFIBP2	6.81722	21.5627	8.39982e-07	1.56535	2.93646	0.888662	-1.36224
LURAP1L	6.80434	19.7627	1.37624e-06	1.24915	2.35486	0.212988	-1.58902
P2RX7	6.8037	21.1359	9.6279e-07	1.23666	2.32484	0.635816	-1.14494
CA12	6.80025	9.92595	4.91528e-05	1.27052	2.51073	0.430512	-1.46011
ARAP2	6.79783	20.1751	1.24953e-06	2.63747	4.97083	0.463295	-3.34085
MADD	6.79547	9.14158	7.37261e-05	0.636315	1.26913	3.86805	2.91533
SYNC	6.79205	17.6751	2.55527e-06	0.917633	1.74113	0.887396	-0.441984
COL8A2	6.79059	18.7373	1.87978e-06	2.2113	4.18452	3.61115	0.413235
ENDOD1	6.78763	11.5521	2.34813e-05	0.75819	1.47963	4.26909	3.15018
ZNF788	6.78706	20.8895	1.06243e-06	1.66422	3.13531	1.72838	-0.671392
GDAP1	6.78377	19.5922	1.50387e-06	1.223	2.3112	0.894811	-0.872288
SMURF1	6.78044	9.50378	6.22069e-05	0.399361	0.79446	3.33736	2.74045
CLUHP3	6.78042	18.3551	2.13969e-06	1.27242	2.41267	0.794653	-1.04789
NRG1	6.77719	13.4827	1.08354e-05	1.59975	3.08895	6.41831	4.07397
ZNF69	6.7746	16.8846	3.36348e-06	1.71876	3.27469	0.277546	-2.21918
B4GALT1	6.77422	10.2686	4.2975e-05	1.08859	2.15006	5.37627	3.75695
GABPB2	6.77337	15.5694	5.16076e-06	0.685825	1.31274	1.76901	0.769729
TAB3	6.77305	8.74509	9.34108e-05	0.844	1.69619	3.14351	1.87342
TOR1AIP1	6.77054	18.4	2.15389e-06	0.659348	1.25131	4.1141	3.15878
CCDC171	6.76949	9.87528	5.2328e-05	0.976718	1.93759	0.0916114	-1.36554
MKL1	6.76817	9.00922	8.15473e-05	0.689944	1.38253	3.62599	2.58975
FOXO1	6.76434	10.6863	3.57541e-05	0.933256	1.83831	5.34758	3.9618
ITGAX	6.76272	10.8982	3.25099e-05	3.55152	6.98445	1.91434	-3.35365
ZNF558	6.76065	16.7382	3.61307e-06	1.93049	3.68503	1.56314	-1.24462
ZNF329	6.75723	11.1471	2.9271e-05	0.532118	1.04499	1.8659	1.07735
NLRX1	6.75496	14.3223	8.22019e-06	0.757425	1.46	2.04058	0.931868
LEPROT	6.74554	8.40694	0.000115822	0.809193	1.63919	4.72086	3.49667
MYO1F	6.74325	7.6472	0.00017946	2.67641	5.49257	2.01187	-2.07262
TMEM248	6.73707	8.85907	9.14531e-05	0.410739	0.827534	5.04326	4.42413
ZNF549	6.73406	21.1026	1.12974e-06	0.463934	0.87833	0.904665	0.233533
MDM4	6.73104	15.9777	4.85987e-06	0.603258	1.15803	3.80348	2.92284
SATB1	6.73053	20.522	1.31732e-06	1.15388	2.18789	2.32306	0.652178
EBF3	6.72196	21.802	9.7864e-07	1.66381	3.14965	1.51163	-0.895096
BAMBI	6.72149	10.2547	4.62396e-05	1.67159	3.32109	2.18115	-0.315195
ABHD4	6.71944	19.1526	1.93375e-06	0.812736	1.54754	2.76053	1.58039
CMPK2	6.71588	10.0535	5.12612e-05	1.82559	3.63643	0.465471	-2.26554
SMAD6	6.70041	19.7594	1.71003e-06	1.41876	2.70292	4.81804	2.7572
LCORL	6.68669	9.14102	8.35646e-05	1.13733	2.2962	3.23358	1.51682
MPPE1	6.68632	9.2872	7.75806e-05	0.709544	1.43002	0.898707	-0.171073
ADD1	6.68363	8.91329	9.43825e-05	0.426277	0.86345	6.18561	5.54075
RHEBL1	6.68269	12.6299	1.74523e-05	0.805567	1.57863	-0.342075	-1.53417
ATXN7L1	6.68269	9.12366	8.47051e-05	0.675814	1.36534	1.23977	0.219195
C11orf54	6.68094	15.7876	5.65239e-06	0.867077	1.67438	1.33236	0.0616359
PHF1	6.67918	7.96337	0.000159305	0.820836	1.68756	3.29265	2.03845
ABTB1	6.67624	10.0637	5.35999e-05	1.5218	3.04444	2.0607	-0.222423
PHIP	6.67617	11.8618	2.40682e-05	0.575442	1.13408	4.46538	3.61062
ZNF287	6.67491	19.4628	1.94976e-06	0.497147	0.950282	0.491509	-0.232205
KLC4	6.6743	20.5811	1.46416e-06	0.709891	1.35366	2.03674	1.00496
MARVELD2	6.67357	18.2725	2.70556e-06	1.07973	2.07036	2.09892	0.523882
DDIT4	6.67262	9.00274	9.12156e-05	2.14528	4.34579	4.77914	1.5336
BBS2	6.67189	21.9517	1.05668e-06	0.638087	1.21379	3.0511	2.12516
DRC3	6.67093	12.127	2.17377e-05	1.06697	2.10021	0.516464	-1.06713
ABR	6.67078	9.8131	6.08733e-05	0.5836	1.17127	4.97911	4.10167
CLN8	6.66857	9.07238	8.83982e-05	0.718722	1.45532	2.64245	1.55543
AUTS2	6.66725	11.3911	2.97471e-05	1.30913	2.59139	2.38127	0.431012
GNAZ	6.66266	20.5424	1.51586e-06	1.35084	2.57917	0.580663	-1.38434
HP1BP3	6.65895	9.73286	6.42189e-05	0.227254	0.457098	5.01476	4.67258
KCNJ2	6.65893	7.5136	0.000211048	1.52102	3.16079	4.40714	2.06624
PRUNE1	6.65737	8.93382	9.61988e-05	0.669911	1.36068	1.82752	0.81222
ZNF655	6.64746	19.7436	1.91808e-06	0.744129	1.42553	2.16001	1.07518
PECAM1	6.64707	19.1518	2.24266e-06	0.870432	1.6699	9.23506	7.9649
GFOD1	6.64444	21.4671	1.25936e-06	1.0385	1.9829	4.54711	3.03641
MINDY2	6.64047	14.5538	9.16222e-06	0.668975	1.30393	2.95462	1.96816
GRAMD4	6.63933	12.3817	2.05477e-05	0.781298	1.54071	2.69358	1.53258
BOD1L1	6.63906	9.51389	7.32428e-05	0.531709	1.07454	4.1927	3.38957
SENP7	6.63876	11.3943	3.0904e-05	0.946872	1.88021	2.70549	1.29195
BEX1	6.63644	21.9198	1.15288e-06	3.3549	6.40571	0.370604	-4.5097
LINC00174	6.63373	11.2548	3.30396e-05	1.21904	2.42464	0.166944	-1.6549
SPAG9	6.62966	8.32266	0.000137368	0.485116	0.997282	5.08281	4.34161
GALNT18	6.62401	18.4299	2.85782e-06	2.18226	4.20459	1.65994	-1.53348
CNKSR3	6.62394	9.90817	6.16151e-05	1.45167	2.92611	3.76868	1.57979
TOB1	6.62007	12.2955	2.18813e-05	1.43843	2.84419	1.85187	-0.289441
ROM1	6.61804	11.7398	2.75117e-05	1.0329	2.05054	1.37787	-0.16385
ZNF417	6.60955	17.9522	3.35914e-06	0.491123	0.948956	0.893536	0.173496
SPARC	6.6082	16.3858	5.33787e-06	0.744443	1.4457	9.21594	8.12087
YY1AP1	6.60543	12.6219	1.9667e-05	0.596828	1.1796	2.93631	2.04809
Z83843.1	6.60222	12.7435	1.88548e-05	1.09704	2.16741	1.05643	-0.575793
MON2	6.60112	9.28989	8.56405e-05	0.493052	1.00347	3.57083	2.82257
PAN3	6.60009	8.43322	0.000133593	0.655695	1.35038	3.16312	2.16008
RBSN	6.59732	9.43931	7.98852e-05	0.458905	0.932714	3.46543	2.76962
NLGN1	6.59259	12.0019	2.56322e-05	1.11402	2.21384	3.93696	2.27303
DMXL1	6.5905	11.6165	3.01121e-05	0.589478	1.17493	3.82648	2.94428
GNPTG	6.5892	13.5744	1.41005e-05	0.631177	1.24303	3.12158	2.18448
WLS	6.58728	19.5281	2.2995e-06	0.429124	0.827751	4.87253	4.2441
FYCO1	6.58702	17.7121	3.75681e-06	0.730118	1.41515	3.90438	2.83175
MCU	6.5766	13.2461	1.62254e-05	0.605795	1.19683	3.6787	2.77739
ESYT2	6.57517	7.83406	0.000190767	0.609222	1.27113	5.34274	4.40257
AFAP1	6.57456	14.8351	9.31155e-06	0.670765	1.31525	6.26824	5.27523
NCOA2	6.57243	10.0545	6.13427e-05	0.858756	1.73867	3.10723	1.80852
FBXL4	6.57176	10.6316	4.72009e-05	0.766393	1.54319	2.86805	1.71326
EPB41L3	6.56602	15.8764	6.75026e-06	0.631568	1.2344	6.12189	5.18891
ANKRD10	6.55816	21.6485	1.46316e-06	0.60125	1.15814	3.52285	2.64315
HAUS7	6.5549	8.4326	0.0001404	1.12933	2.3385	0.70357	-1.03035
TRAPPC9	6.54901	18.4618	3.29261e-06	0.662425	1.28653	2.66584	1.69136
PITPNA	6.54564	10.8563	4.42723e-05	0.568698	1.1463	4.86672	4.00921
LINC01578	6.54008	10.3159	5.66978e-05	1.27212	2.57859	2.76503	0.839677
B4GALT4	6.53684	10.2781	5.79196e-05	0.709297	1.43883	0.896926	-0.177136
CCL28	6.53618	17.8875	3.95104e-06	1.94469	3.78826	0.632156	-2.23432
LOXL1	6.5316	16.6848	5.62297e-06	1.29247	2.52847	1.70389	-0.206582
KCTD2	6.53044	8.99675	0.000107758	0.651955	1.34308	3.62861	2.63109
PXMP4	6.52656	14.7735	1.03195e-05	0.869109	1.71375	0.95575	-0.335679
SCN8A	6.52579	13.966	1.35949e-05	0.920295	1.82169	4.21319	2.8422
ADAL	6.52525	12.0781	2.74352e-05	0.85042	1.70211	0.277621	-0.998645
PHF21A	6.5241	12.9926	1.935e-05	0.777676	1.54776	3.21181	2.04909
CEP162	6.52207	10.664	4.97011e-05	0.608088	1.23117	1.86429	0.944659
PCCA	6.52163	20.6832	1.98739e-06	0.5855	1.13448	1.66896	0.808972
VMP1	6.52035	9.56733	8.23884e-05	0.714833	1.46396	6.45137	5.36197
KLHL28	6.51861	10.3842	5.65337e-05	0.879077	1.78522	1.57613	0.243986
KLHL15	6.50946	11.6701	3.30624e-05	0.705774	1.41931	1.65809	0.59555
ZNF420	6.509	21.4233	1.71959e-06	0.904576	1.75248	0.704119	-0.62441
GLUL	6.50752	7.84252	0.000203581	1.06685	2.2443	6.75275	5.09718
TMEM2	6.49858	11.6288	3.41498e-05	0.457502	0.921483	4.57335	3.88386
GCA	6.4958	9.11552	0.000105738	1.75026	3.61516	2.16617	-0.516543
TCEANC2	6.49247	11.6256	3.44943e-05	0.481424	0.970381	1.73599	1.01008
ZNF43	6.49049	14.0873	1.38189e-05	0.820862	1.63042	2.18886	0.96322
TSC22D2	6.48268	8.26362	0.000166199	1.33372	2.79386	4.71856	2.65477
PPP1R12A	6.47973	11.97	3.0612e-05	0.443687	0.893413	4.58283	3.91428
CSF1	6.47304	12.0807	2.95984e-05	0.919913	1.85237	2.73432	1.34818
PPM1K	6.47295	21.4785	1.8407e-06	0.700384	1.36212	1.91688	0.885627
KBTBD2	6.46897	8.21793	0.000172843	0.727733	1.52822	4.36882	3.24085
KIAA0319L	6.45441	16.8328	6.22897e-06	0.560395	1.10528	3.96793	3.13509
ZNF542P	6.45341	21.0129	2.13715e-06	0.47959	0.935627	1.30474	0.597136
NFYC	6.44965	17.9465	4.61305e-06	0.371355	0.73028	2.51949	1.96868
EDN1	6.44677	18.4325	4.07818e-06	0.885645	1.73981	7.07317	5.76044
RTL6	6.44668	8.62577	0.000143172	0.419291	0.877293	4.0437	3.39541
PLA2G12A	6.44587	9.13284	0.000111203	0.708927	1.47296	1.68463	0.593687
FZD1	6.44021	12.2152	2.94997e-05	1.24638	2.51716	2.04531	0.163543
BORCS5	6.43479	8.48891	0.000155668	0.721163	1.51432	1.00676	-0.110981
IGSF3	6.43477	20.8867	2.29231e-06	1.4732	2.88081	1.32156	-0.855447
LRRC75A	6.43407	12.0775	3.13944e-05	0.894535	1.8096	2.61345	1.26138
FUNDC2	6.43319	13.1857	2.08016e-05	0.384499	0.772474	2.86296	2.28447
RNF125	6.42975	13.4944	1.87471e-05	1.62546	3.26129	1.7086	-0.734781
GBP1	6.42059	20.5411	2.56112e-06	0.802497	1.57294	2.80247	1.61474
AC009041.2	6.41742	8.58295	0.000151252	1.27207	2.67314	1.05836	-0.91424
PROX1	6.41623	16.286	7.84201e-06	1.35171	2.6828	2.33377	0.31651
CD302	6.41593	9.4971	9.67912e-05	1.25622	2.60783	0.779007	-1.15302
ARHGAP5	6.41419	8.86813	0.000131501	0.747477	1.56484	4.00215	2.84599
ALMS1	6.41039	8.19364	0.000186561	0.61464	1.30089	3.81267	2.8549
OSBPL5	6.40944	14.4451	1.40455e-05	0.523647	1.04808	3.17336	2.3875
ZDHHC14	6.40798	10.1315	7.30858e-05	0.736245	1.51907	2.67765	1.54999
CDH11	6.40585	21.1373	2.30873e-06	1.42785	2.79978	6.12575	4.01193
LGALSL	6.3926	13.6517	1.8855e-05	0.93106	1.87467	0.749022	-0.653844
CD99L2	6.39066	19.6883	3.34211e-06	0.571631	1.12647	4.2889	3.43985
MAP3K14	6.38507	8.98737	0.000128282	0.864837	1.81419	2.2287	0.889188
CCDC186	6.38371	10.8243	5.59158e-05	0.526894	1.08309	2.53317	1.72818
ANKRD46	6.38153	9.15809	0.000118583	0.937841	1.96369	2.21109	0.760323
SLX4IP	6.38102	9.23081	0.000114587	0.532058	1.11306	1.40911	0.586557
DLG3	6.3759	11.3209	4.60716e-05	0.799456	1.63796	0.528666	-0.690043
FOXO3	6.37235	7.77156	0.000243623	1.47093	3.15272	3.26029	0.94847
TBC1D12	6.37174	8.50766	0.000165466	0.773636	1.63715	2.62956	1.42417
ELF1	6.37094	7.5837	0.000270527	0.878365	1.89008	4.41553	3.03131
ZNF532	6.36859	20.0146	3.24186e-06	0.438609	0.865851	3.70589	3.05366
GBP2	6.36356	19.0316	4.15282e-06	1.03056	2.04056	4.65325	3.11769
TBCK	6.36301	9.8759	8.68364e-05	0.746833	1.55383	3.0545	1.90416
NEK11	6.3618	12.4518	3.03748e-05	0.915717	1.86386	0.0412728	-1.34852
MAMLD1	6.35979	10.9654	5.44878e-05	1.36658	2.81392	1.71585	-0.374399
CRYBG3	6.35821	11.4693	4.452e-05	0.406759	0.8342	3.72594	3.10546
IFT140	6.3564	15.5729	1.0815e-05	0.819074	1.64154	2.66469	1.43438
ZNF236	6.35534	12.0835	3.52151e-05	0.3664	0.748242	2.40345	1.84613
BISPR	6.35453	19.2434	4.01733e-06	1.19702	2.37135	-0.231789	-2.01598
TNKS1BP1	6.35197	11.3901	4.63599e-05	0.950993	1.95308	6.03574	4.5837
CCDC102B	6.35066	16.9073	7.43289e-06	1.67629	3.34523	0.128176	-2.38258
ITM2A	6.3501	21.7624	2.28211e-06	2.3971	4.72436	1.43671	-2.12403
PRMT2	6.34968	15.8018	1.02243e-05	0.592592	1.1875	4.62645	3.73641
TSPYL5	6.34766	21.9939	2.18464e-06	0.650502	1.28183	3.1235	2.15733
GLRB	6.34738	17.4807	6.3972e-06	0.662098	1.31933	-0.234157	-1.22487
MYRIP	6.34707	16.4947	8.403e-06	1.01284	2.025	4.07798	2.55906
ZNF197	6.33803	17.6512	6.22648e-06	0.409739	0.816931	1.60732	0.993984
NOL3	6.33613	9.79749	9.30877e-05	0.741475	1.5493	1.447	0.301613
CHMP1B	6.33445	19.1773	4.25779e-06	0.574981	1.14192	3.08795	2.2295
H1F0	6.33	16.1153	9.67188e-06	0.509411	1.02197	3.91337	3.14768
TTC23	6.326	12.5453	3.10058e-05	0.46712	0.954358	2.28506	1.57432
MAP3K6	6.32415	13.6513	2.10953e-05	0.802016	1.62818	3.19126	1.97616
PIK3C2B	6.32207	20.1483	3.47433e-06	0.959637	1.90407	4.79033	3.35848
TMEM128	6.31766	10.6458	6.59407e-05	0.788949	1.63786	0.643295	-0.570109
SEMA3F	6.31135	15.0216	1.38624e-05	0.714372	1.44279	5.85718	4.7786
GGT7	6.31095	15.6812	1.13711e-05	0.718838	1.44785	0.523014	-0.560332
FLI1	6.31083	17.3788	7.06215e-06	0.378798	0.758328	5.29563	4.72707
COL5A1	6.3078	10.7174	6.48644e-05	0.911192	1.89272	7.36493	5.96298
ZKSCAN1	6.30576	16.311	9.56721e-06	0.476395	0.957807	4.33646	3.61936
FTX	6.30309	9.57007	0.000107588	0.866726	1.82357	3.31631	1.97116
GORASP1	6.30223	8.67266	0.00016488	0.351115	0.747873	4.11067	3.56117
RTL5	6.30194	14.18	1.8379e-05	1.27111	2.58035	0.0290234	-1.89671
TSHZ1	6.29966	10.6867	6.64309e-05	0.768636	1.59871	3.3103	2.12662
TRIM52	6.29945	8.70232	0.00016301	0.531223	1.13141	1.45092	0.619606
ARID4A	6.29794	10.4979	7.20722e-05	0.750937	1.56508	2.43723	1.27922
ZNF862	6.2975	14.673	1.58271e-05	0.901611	1.8269	2.07375	0.709493
EGFLAM	6.29639	12.9667	2.79278e-05	1.94353	3.97467	0.127098	-2.832
DNAJC18	6.29566	14.7438	1.55299e-05	0.447082	0.905808	2.16813	1.49169
GPR162	6.29407	21.9371	2.49975e-06	0.932487	1.84919	2.48733	1.09649
B3GNT9	6.28628	9.39693	0.000118939	1.32566	2.80124	1.00179	-1.06166
IRS2	6.28575	10.9839	5.99366e-05	1.40451	2.9185	1.55408	-0.607429
TRIM44	6.28325	13.0211	2.79785e-05	0.292199	0.598343	4.74058	4.29531
TDRD3	6.27356	7.43092	0.000325104	0.768657	1.68137	2.44634	1.22133
RMDN2	6.27245	14.7127	1.63288e-05	1.36645	2.77675	0.0890176	-1.98258
NAB2	6.26813	11.146	5.75646e-05	0.573376	1.19243	2.51504	1.63214
ZFHX3	6.26799	13.1495	2.74221e-05	0.76281	1.56378	3.48594	2.32264
CLASP1	6.2652	9.51771	0.000115521	0.365837	0.774011	4.50626	3.93634
PLPP5	6.26191	19.8625	4.22467e-06	0.352695	0.705286	2.52245	1.99346
RABGAP1L	6.26134	10.8591	6.52302e-05	0.743366	1.55125	3.15042	2.00311
DOCK8	6.26106	18.5208	5.82218e-06	1.8486	3.71009	2.74728	-0.0320599
KDSR	6.25516	12.1991	3.922e-05	0.574913	1.18779	3.05887	2.17752
CSRP1	6.25481	17.5283	7.58092e-06	0.449106	0.90472	6.83252	6.15561
KAT2B	6.25342	9.02847	0.00014703	1.57632	3.36182	3.42601	0.956943
THY1	6.25106	21.3056	3.14781e-06	2.74691	5.4822	1.93509	-2.17946
AC135050.6	6.2492	14.2991	1.93523e-05	0.65177	1.33091	0.143387	-0.847954
ARID2	6.24851	8.85883	0.000160333	0.443951	0.949739	3.4477	2.75086
TBC1D32	6.24117	9.6796	0.000110698	0.869634	1.8421	0.194106	-1.16176
THRA	6.24013	9.14606	0.000141373	0.592801	1.26445	3.8497	2.92108
AC240274.1	6.23779	16.2614	1.10214e-05	0.941941	1.90986	-0.139408	-1.56531
WWP2	6.2345	8.6494	0.000180342	0.515693	1.10879	3.74219	2.92995
TNFRSF14	6.23114	15.0165	1.60026e-05	0.796265	1.62411	3.1562	1.94602
TRERF1	6.22919	11.7296	4.85616e-05	1.38775	2.88666	1.92375	-0.213458
SERTAD1	6.22772	9.14218	0.000143773	0.9209	1.96766	3.30144	1.85716
AC068888.1	6.22602	9.16363	0.000142641	1.35847	2.90241	0.400403	-1.73003
ARSB	6.22583	11.739	4.86312e-05	0.482192	1.00337	3.68014	2.93736
NBEAL1	6.22293	12.2313	4.07106e-05	0.477498	0.990358	2.77437	2.04044
FCHO2	6.22251	8.64809	0.00018298	0.859271	1.85056	3.32962	1.9747
VWA1	6.22198	9.00104	0.000154658	1.6124	3.45461	2.41766	-0.115854
C6orf132	6.22125	21.6886	3.10914e-06	2.60251	5.20851	-0.324731	-4.23024
CNTN1	6.22036	21.6249	3.15662e-06	3.53323	7.07287	1.33237	-3.97068
FAT1	6.2159	19.111	5.54767e-06	1.6836	3.39198	4.05486	1.51707
EPHB1	6.20917	21.99	3.00601e-06	1.32123	2.6465	0.0180836	-1.96578
PCDH7	6.20791	20.0267	4.57448e-06	1.29537	2.60629	4.61602	2.66519
PDE4A	6.20473	19.5445	5.13671e-06	0.988445	1.99191	1.92456	0.434385
INO80D	6.2022	10.8475	7.11526e-05	0.606986	1.27655	3.22239	2.28063
RNPC3	6.20065	9.11041	0.000150781	0.747573	1.60385	1.6729	0.49719
STIM2	6.19889	14.5908	1.92749e-05	0.698777	1.43387	3.40421	2.33789
MOSPD2	6.19754	13.0176	3.21226e-05	0.633427	1.3112	2.12963	1.15732
NAP1L3	6.19404	15.5196	1.4751e-05	2.15616	4.40861	0.728478	-2.5539
IMPAD1	6.19124	9.03776	0.000157742	0.63936	1.37484	5.63539	4.62829
FBLN1	6.19013	16.4926	1.13179e-05	2.38202	4.85417	0.43724	-3.18085
FCER1G	6.18767	13.0697	3.20632e-05	2.81538	5.83339	0.421427	-3.90296
KAT8	6.18742	10.6743	7.78751e-05	0.493843	1.04233	2.80663	2.03855
UHRF1BP1	6.18734	20.9098	3.94982e-06	0.408807	0.822903	3.12608	2.51022
IDS	6.18387	10.4243	8.66852e-05	0.75687	1.60222	3.42162	2.24207
TM2D3	6.17839	9.39144	0.000136288	0.675247	1.44759	2.55934	1.49792
CEP192	6.17797	11.2426	6.30192e-05	0.430049	0.904114	3.94883	3.28174
SIRPA	6.17755	17.7526	8.34969e-06	0.632907	1.28624	3.87372	2.91414
BNC2	6.17415	11.7248	5.27794e-05	0.596378	1.24946	3.76818	2.84526
ZNF181	6.16631	13.747	2.65569e-05	0.631577	1.30704	0.733309	-0.236
PIK3AP1	6.16446	14.3358	2.21315e-05	3.21246	6.62911	0.605557	-4.31523
ACVR2A	6.16134	9.86665	0.000112989	0.808908	1.72803	2.28954	1.02108
ZNF717	6.15959	10.4976	8.69339e-05	0.768857	1.63166	0.88894	-0.311319
ZNF264	6.15838	9.73141	0.000120257	0.566747	1.21314	3.25536	2.36542
SUN1	6.15276	8.19718	0.000247345	0.567098	1.24249	4.95793	4.05313
OFD1	6.15033	12.2995	4.44073e-05	0.445017	0.931265	1.67826	0.990122
CEMIP	6.14943	12.0332	4.89151e-05	1.61536	3.38732	0.23427	-2.26707
BRWD3	6.14089	11.486	6.0611e-05	0.443749	0.935581	2.80807	2.11841
ERMP1	6.13863	12.3143	4.49794e-05	0.594197	1.24523	2.8175	1.89779
MRAS	6.13775	15.9463	1.45081e-05	1.28558	2.64275	4.06227	2.09811
CASZ1	6.13751	21.3059	4.06946e-06	0.863264	1.74692	0.026796	-1.27829
USP37	6.13185	14.4747	2.24452e-05	0.408437	0.845794	2.15756	1.53044
STK19	6.13022	10.32	9.72982e-05	0.413697	0.88305	1.22239	0.574019
DIP2C	6.12878	10.3935	9.45941e-05	0.70302	1.49975	3.03065	1.92926
TKFC	6.12743	13.507	3.06126e-05	0.568093	1.18321	2.15105	1.2754
ZNF160	6.12332	12.8616	3.81413e-05	0.56688	1.18599	2.72719	1.85075
SP100	6.12079	10.4486	9.35056e-05	0.357174	0.762355	4.43257	3.8728
CWF19L2	6.11977	18.0528	8.71434e-06	0.462244	0.945382	1.92875	1.22493
PPP1R3B	6.11888	13.5061	3.10584e-05	0.647124	1.34933	4.50506	3.50683
PITPNM3	6.11041	17.2025	1.09633e-05	1.50211	3.0843	1.5657	-0.727505
MDK	6.10453	21.8727	3.91802e-06	0.802951	1.62965	4.3268	3.1105
ASXL1	6.10438	9.39525	0.000149249	0.413519	0.895534	4.85305	4.19853
KLHL26	6.10262	9.06962	0.000173089	0.58973	1.28318	1.0817	0.145245
PARP6	6.09685	10.1646	0.000108489	0.541897	1.16394	3.08006	2.22714
RAPGEF5	6.09253	18.1593	8.97992e-06	0.889414	1.82478	4.87322	3.51613
CYTH3	6.08946	13.4911	3.27702e-05	0.514436	1.07692	1.99366	1.19798
SOD2	6.08847	8.35188	0.000246508	1.46403	3.22829	4.55852	2.21236
TTC3P1	6.08845	11.3091	6.99307e-05	0.85885	1.82631	1.45174	0.10916
OS9	6.08828	15.9404	1.59402e-05	0.64482	1.33407	5.56903	4.57959
GPNMB	6.08552	16.5031	1.3785e-05	3.06264	6.32463	0.0577407	-4.6359
HYAL2	6.08539	9.40335	0.00015231	0.802642	1.74268	7.39068	6.11802
CNTNAP3	6.08481	16.5369	1.36821e-05	0.949514	1.96077	2.51139	1.05625
KIF27	6.08453	15.8745	1.63433e-05	0.727552	1.50637	-0.0673711	-1.18433
MANBA	6.08295	12.9618	3.93551e-05	1.14548	2.40783	2.2131	0.436441
PDK2	6.08289	13.9051	2.90794e-05	0.87678	1.83276	1.90008	0.545313
NSUN6	6.08275	12.8226	4.12368e-05	0.511962	1.07715	1.02459	0.23003
LRRC32	6.07658	14.0887	2.77776e-05	0.781955	1.63429	5.21697	4.00885
MAP3K11	6.06912	10.2274	0.000109737	0.426888	0.919811	5.3255	4.65215
L3MBTL1	6.06293	11.1003	7.85118e-05	0.980742	2.09669	1.17643	-0.362283
GALC	6.06105	9.8774	0.000128205	0.707534	1.53233	3.02737	1.90744
PEX1	6.06037	10.9977	8.19403e-05	0.519842	1.11279	2.39705	1.58074
MARVELD1	6.05569	10.1506	0.0001153	0.571908	1.23565	4.83121	3.92744
SULT1C4	6.05212	18.8489	8.31895e-06	0.933116	1.92054	1.84824	0.421414
GPHN	6.04733	17.3626	1.1936e-05	0.442427	0.915397	1.44429	0.765382
AL365205.1	6.04475	13.9597	3.05148e-05	1.32837	2.79005	0.277233	-1.78197
FUK	6.04443	10.8436	8.89241e-05	0.511266	1.09845	2.26387	1.45902
BDNF	6.04074	21.9912	4.43951e-06	1.88382	3.8536	2.75714	-0.11157
ZDHHC17	6.04035	9.77048	0.000137778	0.722454	1.57125	2.85712	1.71027
NR1D1	6.03365	8.52647	0.000241638	1.86125	4.12466	2.71444	-0.278511
ZNF462	6.03335	9.9537	0.000128812	0.736569	1.60003	3.61832	2.45002
ZNF276	6.03196	8.03634	0.000306547	0.800889	1.79097	3.27832	1.98239
GCNT1	6.03039	21.9555	4.5788e-06	0.733343	1.50227	3.2212	2.10339
RAB20	6.02796	9.27275	0.000173361	1.76404	3.86828	-0.273335	-3.08949
FAS	6.02086	10.8867	9.04398e-05	0.920872	1.9842	1.21364	-0.238898
SQOR	6.01969	18.3112	1.00671e-05	1.10328	2.28404	2.31863	0.624974
FAM160A2	6.01926	11.5298	7.13607e-05	0.490899	1.05188	2.93496	2.16357
NEMF	6.01469	12.7469	4.716e-05	0.283047	0.601348	3.15412	2.71192
NEU3	6.01125	8.56569	0.00024356	0.378484	0.840957	2.34022	1.7305
VGLL3	6.01019	18.408	1.00411e-05	2.13427	4.42269	2.43757	-0.840915
RFX3	6.00673	10.9544	8.99378e-05	0.612629	1.3218	1.41487	0.447649
DNAL1	6.00528	10.6354	0.00010184	0.586587	1.26984	1.75208	0.823871
ATL1	6.00482	21.2267	5.59075e-06	1.05659	2.17506	-0.353447	-1.96927
SELPLG	6.00239	10.3065	0.000116362	2.28696	4.96998	0.943699	-2.68477
WDTC1	6.00158	15.7189	1.99035e-05	0.505512	1.05891	3.80088	3.01867
PLEKHH3	5.99923	9.35975	0.000173067	0.755621	1.66189	2.33967	1.13091
HSPA12B	5.99848	13.8502	3.41456e-05	0.96193	2.03436	3.70216	2.20401
TNFAIP2	5.99768	11.0481	8.79556e-05	0.813325	1.75552	3.20021	1.91579
TMEM9B	5.99417	10.0341	0.000131302	0.586386	1.27974	2.95043	2.01737
TRIM38	5.99004	13.6649	3.66578e-05	0.348846	0.739401	3.23094	2.68681
ZNF782	5.98991	12.0299	6.2486e-05	0.491555	1.05336	0.717729	-0.0547273
AMOTL2	5.98845	8.53235	0.000254093	0.566259	1.26313	5.64607	4.73137
RAI2	5.98818	21.5684	5.43609e-06	1.077	2.22027	1.14963	-0.499008
AC006001.3	5.97797	8.98844	0.000209121	0.667113	1.47963	1.98274	0.909368
ZBTB47	5.97783	8.65823	0.000242781	0.613989	1.36891	3.14098	2.14953
AC003681.1	5.97692	9.6502	0.00015739	0.880649	1.93576	1.77943	0.371229
TMCO4	5.97663	10.9972	9.2409e-05	0.516253	1.11817	1.08349	0.266273
ERAP1	5.97612	13.7804	3.62323e-05	0.673032	1.42832	4.2142	3.16353
PPP1R21	5.97514	9.83972	0.000145818	0.534351	1.17209	1.92014	1.06692
SLC25A4	5.97454	14.3391	3.07645e-05	0.458949	0.971228	1.94718	1.23209
LAPTM4A	5.97387	9.62369	0.00015978	0.726999	1.59928	4.95655	3.79342
WNT2B	5.97351	8.41809	0.000272744	0.900181	2.01645	1.11496	-0.343354
COL4A3BP	5.96993	19.3428	8.88698e-06	0.610402	1.26826	2.74755	1.80821
PLEKHA3	5.96853	9.52374	0.000167801	0.576564	1.27098	3.14323	2.21945
MMP25	5.96612	9.69595	0.000156602	2.52952	5.56571	0.543235	-3.50438
SMPDL3B	5.96145	21.8908	5.4414e-06	2.50399	5.17674	-0.44467	-4.28504
NAAA	5.95938	19.5299	8.73658e-06	0.560947	1.16656	1.52803	0.664274
EIF1	5.95475	18.9116	1.00782e-05	0.816538	1.70208	5.63468	4.37537
PPP1R3F	5.95378	16.9883	1.57542e-05	0.725466	1.5219	0.0137646	-1.10992
ZNF680	5.94665	12.4925	5.71787e-05	0.752848	1.61757	0.941647	-0.243562
DICER1	5.94618	16.8635	1.64891e-05	0.301578	0.633602	4.19268	3.72509
ZBTB5	5.94333	10.4209	0.000120653	0.296354	0.648737	2.38268	1.91014
IER5	5.94261	10.3265	0.0001253	0.843329	1.84818	3.63544	2.28968
GJA4	5.93999	21.6283	6.00719e-06	1.6937	3.51358	4.5722	1.96856
TRIM56	5.93982	8.59735	0.000261196	0.646595	1.45132	3.85217	2.80321
DYM	5.93708	11.4023	8.44194e-05	0.391566	0.849785	3.56702	2.94634
IFITM3	5.93498	12.2802	6.25015e-05	1.20297	2.59301	6.05864	4.16065
GATAD2B	5.92711	10.751	0.00010879	0.752974	1.64654	4.00736	2.80761
MBD5	5.92671	10.5661	0.000116759	0.623073	1.36515	2.76473	1.77062
ZNF461	5.92648	19.9226	8.65041e-06	0.652869	1.36235	0.0998064	-0.907802
TASP1	5.92226	9.37655	0.000189496	0.698394	1.55322	1.27634	0.150539
YTHDC1	5.92217	10.1524	0.000137989	0.257777	0.567734	3.61703	3.20427
PKD2	5.92195	8.9585	0.000227026	0.719627	1.61026	4.15032	2.98537
KRBOX4	5.91839	15.0598	2.77451e-05	0.446587	0.949031	0.842791	0.144982
WWC3	5.91806	11.0357	9.91452e-05	0.454296	0.991961	4.51675	3.79362
ZNF720	5.91541	12.3422	6.31407e-05	0.523307	1.13063	1.41481	0.587842
FAM117A	5.91358	10.3577	0.000128844	1.44098	3.17036	2.52434	0.21867
INSR	5.91101	21.6283	6.42411e-06	0.974239	2.02896	4.53232	3.03072
CD58	5.90771	11.9654	7.25145e-05	1.12032	2.4302	1.74727	-0.0279926
ETS2	5.906	12.5821	5.92488e-05	0.482398	1.04184	4.30954	3.54742
AP4S1	5.9057	10.296	0.00013341	0.457967	1.00946	1.06114	0.327429
ABHD14B	5.90528	12.8922	5.37049e-05	0.503931	1.08613	2.63718	1.84215
ZNF432	5.90386	11.8975	7.46538e-05	0.627367	1.36239	1.22328	0.228402
APP	5.8987	17.6524	1.50245e-05	0.482946	1.01845	8.43886	7.68816
CIRBP	5.89853	16.2926	2.08491e-05	0.693081	1.46898	5.23432	4.15328
MGMT	5.89706	20.7298	7.86497e-06	0.734085	1.53488	1.58459	0.450109
GCC2	5.89673	10.5451	0.00012275	0.745109	1.64011	2.93842	1.74581
GPX3	5.89596	21.696	6.56955e-06	0.981589	2.04815	1.09157	-0.423297
SRSF7	5.8942	9.57815	0.000180608	0.661152	1.4726	5.49319	4.42631
WDSUB1	5.89134	14.2441	3.65917e-05	0.655068	1.40319	-0.147576	-1.17671
GON4L	5.88654	9.14976	0.000218365	0.40907	0.917649	3.83867	3.17531
UBAC2	5.88606	13.6859	4.34645e-05	0.305953	0.657938	3.08736	2.60541
WDR78	5.88154	10.8641	0.000111324	1.62439	3.57191	0.302161	-2.29599
AC024075.2	5.87721	11.668	8.41278e-05	0.800783	1.74906	0.189962	-1.08496
AC135983.2	5.87219	12.1171	7.28191e-05	0.741141	1.61409	-0.288111	-1.46573
ICE2	5.87173	9.81252	0.000169102	0.52541	1.1707	3.05356	2.20551
RECK	5.86962	16.1152	2.30451e-05	0.845875	1.80144	3.50402	2.18037
TMEM175	5.86506	11.7351	8.37472e-05	0.640493	1.40067	1.64817	0.627588
FBXO3	5.86143	11.5981	8.8269e-05	0.388428	0.850882	2.81429	2.19463
MNT	5.86068	9.17607	0.00022309	0.675733	1.52128	2.47521	1.3767
CTGF	5.86028	16.4229	2.17359e-05	1.04628	2.22838	8.62769	6.99037
MLYCD	5.85687	10.3703	0.000138713	0.807555	1.79158	1.81986	0.520288
STEAP2	5.85617	12.6206	6.34018e-05	1.07984	2.34841	2.31325	0.599129
YPEL3	5.85443	11.4337	9.44443e-05	1.28205	2.81539	3.02182	0.973095
WDR60	5.85276	12.0319	7.72201e-05	0.574449	1.25548	1.94893	1.03396
SDC3	5.84667	12.0773	7.67898e-05	0.856668	1.87329	4.53236	3.16739
PLCXD3	5.84402	20.1632	9.89238e-06	3.84675	8.11369	0.693345	-5.28687
RNF213	5.84233	15.0551	3.19228e-05	0.629882	1.3531	6.12578	5.13429
PARP16	5.84207	9.94858	0.00016669	0.578955	1.29367	0.9007	-0.03561
ROBO3	5.8399	13.0518	5.68954e-05	0.893936	1.94298	3.76495	2.34649
PARP10	5.83859	15.1126	3.16543e-05	0.858791	1.84532	2.97395	1.62189
EPC2	5.8378	9.18853	0.000228442	0.543279	1.22721	2.71447	1.82923
MAGED2	5.8359	16.3212	2.33655e-05	0.641609	1.37183	6.17097	5.16425
TMEM231	5.83313	14.1727	4.13634e-05	0.408199	0.882082	0.641461	-0.00367941
LIPA	5.83234	13.3522	5.25983e-05	1.04203	2.26297	3.96508	2.31258
KIAA1522	5.83204	21.0384	8.59777e-06	0.639247	1.34767	3.50473	2.51127
ZNF638	5.82876	15.707	2.76199e-05	0.242275	0.519895	4.69505	4.31396
SENCR	5.82546	18.3928	1.48191e-05	0.684473	1.45482	0.998378	-0.071268
GIMAP1	5.82449	21.2663	8.38705e-06	0.553438	1.16738	2.44989	1.58948
BRPF3	5.82064	11.7485	8.92334e-05	0.402359	0.885634	3.49466	2.85067
RBMS2P1	5.82008	11.6294	9.29884e-05	0.848025	1.86865	0.755602	-0.602735
PCM1	5.81642	12.0255	8.18963e-05	0.262958	0.577847	5.16716	4.74675
CCDC191	5.8131	14.3431	4.08535e-05	0.984227	2.13106	0.311897	-1.24575
ZFP28	5.80976	12.5341	7.0233e-05	0.424545	0.930232	1.23217	0.554785
ANKRD50	5.80914	10.1544	0.000160939	0.981592	2.19904	6.004	4.41369
NIPBL	5.8069	15.9633	2.69919e-05	0.759807	1.63379	4.22341	3.02661
HELQ	5.80626	19.5737	1.20837e-05	0.427397	0.907726	1.34315	0.675591
ZNF841	5.80409	14.0887	4.45726e-05	0.399456	0.867277	1.91451	1.28114
RNF103	5.80369	15.2621	3.24595e-05	0.430375	0.928794	2.08321	1.40362
SNX29	5.80303	17.3499	1.95538e-05	0.570596	1.22095	2.57478	1.679
ZNF394	5.80226	9.04433	0.000253923	0.421605	0.959765	2.41258	1.72189
DGCR2	5.80192	12.0706	8.25458e-05	0.338585	0.74539	4.26143	3.71944
B4GAT1	5.7994	14.3115	4.22282e-05	0.459568	0.997239	3.11326	2.38486
RAB27A	5.79644	18.9341	1.40579e-05	1.1354	2.41925	2.66457	0.887241
ATP6V0A1	5.79031	9.75329	0.000192997	0.543503	1.22723	3.31318	2.42781
RAB23	5.78803	15.903	2.8406e-05	0.560346	1.20853	1.70913	0.82469
MAFF	5.78236	8.45772	0.000335613	0.955353	2.20322	5.18773	3.60844
PINK1	5.78228	12.7378	6.89049e-05	0.898123	1.97312	2.42667	0.991044
TNRC18	5.78011	8.48068	0.000333102	0.832752	1.92039	4.88695	3.51038
CHD2	5.78001	10.6771	0.000137926	0.408519	0.913983	4.54683	3.88558
ENPP4	5.77861	11.725	9.59433e-05	1.18243	2.61978	3.25596	1.35486
RNF20	5.77657	12.5145	7.45541e-05	0.261792	0.576572	3.05762	2.63844
SGIP1	5.77389	21.9772	8.31167e-06	1.123	2.38201	1.29699	-0.455516
ZNF502	5.76901	14.031	4.81759e-05	0.566785	1.2374	0.604185	-0.297907
C17orf58	5.76889	14.851	3.85482e-05	0.73952	1.60741	1.93964	0.766175
SLC22A23	5.76585	16.7664	2.40969e-05	0.504454	1.08765	2.07569	1.27964
DDX60L	5.76467	21.4248	9.35841e-06	0.907174	1.92915	3.36823	1.95007
RNF19B	5.76418	8.53708	0.000331183	0.633073	1.46222	4.14743	3.09979
PURB	5.76341	14.8383	3.9067e-05	0.735024	1.59904	3.54826	2.38123
MCPH1	5.76275	19.3972	1.37643e-05	0.277307	0.592942	2.23326	1.79813
CHST3	5.76152	19.2703	1.41554e-05	0.786248	1.68208	3.82592	2.59175
UBR3	5.76119	9.19083	0.000251617	0.692202	1.58259	4.02449	2.88709
SLC25A28	5.76086	12.6028	7.43992e-05	0.759017	1.67456	2.16735	0.950566
RDH13	5.75792	9.56386	0.000217211	1.00139	2.27849	2.18977	0.549831
BFSP1	5.75628	13.3538	5.97845e-05	0.813176	1.78607	0.529419	-0.770204
CCNG2	5.75608	11.6882	0.000100552	0.80654	1.79372	2.20523	0.905104
MAST4	5.75348	14.2603	4.64658e-05	0.616782	1.34794	5.2538	4.27144
PPP1R9A	5.74969	12.7296	7.28637e-05	1.1158	2.46362	2.12857	0.338857
ZNF34	5.74861	9.46042	0.000229175	0.684346	1.56167	0.190565	-0.932443
CREB3L2	5.74411	9.31427	0.000244532	0.700871	1.60389	5.54788	4.3955
SH3BP2	5.73931	8.20778	0.000395021	0.503773	1.17555	4.94861	4.10895
TCTEX1D1	5.73919	21.8182	9.26973e-06	1.17813	2.51233	0.380419	-1.46481
TACC1	5.73902	7.77139	0.000483316	0.562735	1.32525	6.82682	5.88283
IFNAR1	5.73872	12.0299	9.23763e-05	0.573263	1.27467	3.73543	2.81146
CRADD	5.73871	20.4342	1.18924e-05	0.345459	0.739176	0.291132	-0.251185
ERICH1	5.73672	10.0404	0.000185686	0.587186	1.33231	2.03244	1.07269
ELL	5.73573	9.63621	0.000217377	0.367599	0.83856	2.36611	1.76303
CCDC120	5.72985	10.8423	0.000139768	0.929781	2.09296	1.20627	-0.305095
EXOC3L2	5.72859	21.4505	1.013e-05	1.52758	3.26528	0.513368	-1.88306
DOCK9	5.72499	10.1698	0.000179736	0.521923	1.18459	6.37388	5.52062
HILPDA	5.72449	7.16212	0.000660474	1.7813	4.26914	3.84354	0.81832
TK2	5.72279	21.1936	1.07432e-05	0.534371	1.1439	2.87317	2.03403
SCARNA9	5.71862	11.6643	0.000107368	1.35628	3.03455	0.402244	-1.79317
USP20	5.71021	9.66693	0.000222217	0.599903	1.37357	2.51651	1.52978
RORA	5.70948	10.4625	0.000164912	0.754482	1.71085	3.09488	1.86221
BAIAP2	5.70592	7.69233	0.000520612	0.950671	2.25549	3.08217	1.47909
ARMC7	5.7021	9.07467	0.000284629	0.926646	2.14287	2.02997	0.495216
PKP4	5.7013	10.47	0.000166391	0.502031	1.13979	4.40978	3.58887
LRCH2	5.70123	9.6326	0.00022793	0.695079	1.59455	1.05773	-0.0870822
ZNF594	5.69868	12.2715	9.1184e-05	0.644545	1.43934	0.456545	-0.585398
H3F3A	5.69854	11.5958	0.000113265	0.525138	1.17938	2.40079	1.54853
ZNF780B	5.69669	11.7111	0.000109376	0.594855	1.33499	1.61456	0.649643
AC126755.1	5.69637	15.546	3.69382e-05	0.839589	1.83868	0.142807	-1.19633
KLHL24	5.69429	21.8373	1.02679e-05	0.836009	1.79444	3.28424	1.96902
PPP1CB	5.69243	10.1712	0.000187968	0.896398	2.04517	5.12723	3.65645
MLLT3	5.68993	12.922	7.58968e-05	0.676782	1.50609	2.20433	1.11289
SETDB1	5.68852	14.2814	5.18717e-05	0.241793	0.53361	3.20599	2.81829
CYSLTR2	5.68754	20.5127	1.31597e-05	2.38413	5.13885	2.58036	-1.18113
PTPRS	5.68045	10.5004	0.000169548	1.00692	2.29299	4.02409	2.37414
SPG11	5.67941	13.2995	6.91995e-05	0.387846	0.862296	3.89793	3.27285
ULK4	5.67523	17.3639	2.5274e-05	0.58703	1.28001	1.45549	0.521967
ZNF211	5.66965	10.1858	0.000192999	0.55962	1.28131	1.61859	0.698127
PARGP1	5.66808	14.831	4.66052e-05	0.507884	1.12104	0.171484	-0.642979
H6PD	5.66753	21.9998	1.06428e-05	0.637146	1.37253	4.92567	3.92083
IFNGR1	5.66475	7.92401	0.000489884	0.907403	2.15691	3.89933	2.36717
NUMA1	5.66172	12.7101	8.46977e-05	0.495204	1.10859	5.51891	4.71701
SLC35C2	5.66117	16.9988	2.81759e-05	0.247544	0.541672	3.0106	2.616
AVIL	5.66082	9.11613	0.000295039	0.900807	2.0961	-0.00141058	-1.49986
CRTAP	5.66038	10.703	0.000162415	0.308754	0.703822	5.35236	4.84608
SHROOM4	5.65634	14.1462	5.69612e-05	0.469728	1.04263	5.45966	4.70348
ZER1	5.65588	9.79515	0.000227606	0.757114	1.74604	3.50178	2.25021
CREBBP	5.65497	9.71065	0.000235338	0.619657	1.43087	4.56845	3.54318
RC3H1	5.65187	7.57055	0.000585575	0.407843	0.979546	4.15269	3.45899
EVI5	5.65064	15.7252	3.85804e-05	0.672166	1.48116	4.12156	3.0449
DENND1B	5.64615	11.8253	0.000114061	0.76245	1.72323	0.360729	-0.882112
C6orf48	5.64509	11.0071	0.000149541	0.527946	1.20263	4.07841	3.21312
GTPBP1	5.64431	9.54709	0.000254225	0.379316	0.879432	4.12039	3.49101
CDC37L1	5.64388	11.9371	0.000110487	0.554883	1.25336	1.08287	0.178752
DOCK1	5.6435	21.0177	1.33038e-05	0.322026	0.697815	4.82729	4.31737
NADK2	5.63788	13.3967	7.22638e-05	0.645175	1.4429	2.17208	1.12804
SLC9A3R2	5.63074	10.5575	0.000178428	0.869218	1.99427	4.68431	3.25257
IRAK4	5.63052	10.2536	0.000198926	0.364766	0.839881	2.32748	1.72516
MAP3K7CL	5.63038	8.82722	0.000345095	1.07554	2.52748	0.41754	-1.38397
SARAF	5.62737	10.3749	0.000191296	0.449229	1.03342	5.30566	4.56434
TPT1	5.62189	7.95776	0.000506911	0.6452	1.54401	7.65867	6.56407
ADA2	5.61221	20.2797	1.6275e-05	1.76861	3.85812	2.07429	-0.739078
CCL2	5.61211	11.981	0.0001146	1.99094	4.51861	5.54812	2.29335
ZNF708	5.61194	9.2819	0.000294244	0.774446	1.81238	1.16202	-0.131397
HCG11	5.60871	8.93434	0.000339466	0.591816	1.39341	1.40846	0.41584
CD79B	5.60504	21.8881	1.25683e-05	1.44505	3.14321	0.384326	-1.9098
ZNF565	5.60133	8.61975	0.00039001	0.700608	1.6607	0.450757	-0.729896
ATG9B	5.59645	10.323	0.000203631	1.2002	2.77694	1.61639	-0.372186
HSPG2	5.59211	15.0146	5.12182e-05	0.872295	1.94665	11.1563	9.74679
AKAP9	5.58985	11.6631	0.00013114	0.44506	1.01663	4.28449	3.55365
CCDC9	5.58435	8.14948	0.000486613	0.875221	2.09983	2.15844	0.67092
COA5	5.58334	9.69328	0.000261019	0.500708	1.17051	1.57435	0.738741
AKT3	5.58241	18.1841	2.58257e-05	0.360434	0.794941	4.60936	4.03167
OCLN	5.57865	14.5012	5.97135e-05	1.27325	2.85545	1.64132	-0.423027
TMEM245	5.57078	8.30707	0.000462033	0.512011	1.22745	4.7849	3.91517
TMBIM6	5.56571	8.18271	0.000490385	0.350952	0.844223	6.89115	6.29356
TBC1D8B	5.56487	9.01603	0.000347453	0.808639	1.91587	1.50065	0.1384
ARFGEF3	5.56364	11.268	0.000155	0.615124	1.41652	3.62075	2.60492
YAF2	5.5608	13.3805	8.28816e-05	0.357945	0.810625	1.1562	0.571911
MGAT1	5.55945	8.72998	0.000392615	0.407007	0.969946	5.0011	4.31263
SLC37A3	5.55475	11.7561	0.000134564	0.253129	0.581107	3.22943	2.81231
NBPF11	5.55341	16.6744	3.75694e-05	0.623044	1.38833	-0.575152	-1.58084
STAMBP	5.55307	10.8075	0.00018338	0.306368	0.710144	2.42078	1.91253
SPICE1	5.55191	13.5252	8.0912e-05	0.354489	0.803198	1.82781	1.24897
PIGH	5.54863	18.3939	2.6619e-05	0.561435	1.24399	0.846248	-0.0564646
SDCBP2	5.54633	7.9293	0.000560481	0.89038	2.16105	0.81054	-0.715173
COG7	5.54069	11.2922	0.000159274	0.412563	0.953515	1.7484	1.06536
[truncated: 10,069 more rows]

## Sheet: flow
	statistic.t	parameter.df	p.value	conf.int1	conf.int2	estimate.mean of x	estimate.mean of y
KIT	-16.5135	15.9855	1.81902e-11	-0.660744	-0.51039	3.09123	3.67679
TNFRSF21	-15.166	13.9123	4.79896e-10	-0.395506	-0.29745	3.4337	3.78018
CDCA7L	-13.5869	9.43358	1.6515e-07	-0.32197	-0.230609	3.22924	3.50553
PDGFB	-11.3272	17.9531	1.30848e-09	-0.739026	-0.507739	3.47529	4.09867
SLC7A7	-11.2845	16.0119	4.94661e-09	-0.515467	-0.352434	2.40048	2.83443
ACSS1	-11.0789	17.3439	2.71704e-09	-0.504215	-0.3431	2.61921	3.04287
PIM3	-11.0481	16.592	4.58013e-09	-0.496751	-0.337196	3.76335	4.18032
COLEC12	-10.8305	17.9612	2.64172e-09	-0.466504	-0.314901	3.1417	3.5324
TCF4	-10.7565	12.8547	8.53238e-08	-0.39625	-0.263576	3.97248	4.30239
CYTOR	-10.6998	17.9995	3.12361e-09	-0.326722	-0.219475	2.6468	2.9199
RASD1	-10.6715	17.2365	5.13025e-09	-0.774972	-0.519346	1.88314	2.5303
CHST15	-10.2637	17.1621	9.61296e-09	-0.347988	-0.229387	3.42667	3.71535
EVA1A	-10.0867	17.257	1.1798e-08	-0.479865	-0.314001	3.02464	3.42157
RALGPS2	-10.0594	17.6192	1.0043e-08	-0.328658	-0.214949	3.05787	3.32968
VASH1	-10.0197	16.4135	2.10128e-08	-0.42119	-0.274335	4.09945	4.44721
TGFBRAP1	-9.72837	10.9781	9.88303e-07	-0.258967	-0.163388	3.45458	3.66576
FILIP1	-9.70565	17.9668	1.43607e-08	-0.748552	-0.48212	2.47498	3.09031
PAWR	-9.58298	17.7853	1.91184e-08	-0.321134	-0.205563	3.42236	3.68571
ARID3A	-9.40402	13.0451	3.55161e-07	-0.37685	-0.23609	2.61028	2.91675
FZD8	-9.32973	16.5658	5.30295e-08	-0.427673	-0.269663	3.0029	3.35157
SEC14L1	-9.14159	17.8434	3.75967e-08	-0.322124	-0.20167	4.27505	4.53695
AMOTL2	-9.10195	15.3983	1.3712e-07	-0.436562	-0.271196	3.44196	3.79584
FGD4	-9.04126	10.3619	3.08591e-06	-0.4169	-0.252668	2.93792	3.27271
OSBPL10	-9.00993	11.9399	1.1331e-06	-0.397046	-0.242341	3.02948	3.34917
PDE4B	-8.95909	13.9916	3.5965e-07	-0.381372	-0.234036	3.31744	3.62514
ABCA6	-8.92611	13.3052	5.53871e-07	-0.42161	-0.257604	2.91521	3.25481
GRAMD1C	-8.9202	16.8089	8.81619e-08	-0.355787	-0.219582	2.66051	2.9482
DACH1	-8.72272	17.5602	8.52734e-08	-0.563349	-0.344335	2.7406	3.19444
C15orf54	-8.70955	14.7341	3.41372e-07	-0.747151	-0.452985	2.28454	2.8846
SH3TC1	-8.67579	11.6328	2.02508e-06	-0.321732	-0.192209	3.69991	3.95688
MYO6	-8.65546	10.3286	4.72026e-06	-0.276	-0.163379	3.60794	3.82763
CERK	-8.6228	12.7167	1.14349e-06	-0.258578	-0.15478	3.86099	4.06767
LINC00704	-8.58098	17.9446	9.12044e-08	-0.490386	-0.297453	2.63882	3.03274
ANGPT2	-8.58089	14.509	4.60758e-07	-0.795951	-0.478459	3.63889	4.2761
NOX4	-8.55988	15.4113	3.02709e-07	-0.337217	-0.20301	2.99564	3.26576
PIK3CD	-8.51424	17.607	1.18282e-07	-0.408262	-0.24645	2.34308	2.67044
CNTNAP3	-8.51015	14.4489	5.25673e-07	-0.336261	-0.2012	2.47303	2.74177
HIC1	-8.47054	16.2555	2.32853e-07	-0.306657	-0.184014	3.32529	3.57063
LOXL2	-8.47039	9.78706	8.18414e-06	-0.178868	-0.10419	4.2791	4.42063
TXNRD2	-8.44438	17.551	1.36344e-07	-0.264365	-0.158872	3.01899	3.23061
RASSF2	-8.36205	17.9828	1.30673e-07	-0.43778	-0.261961	3.56016	3.91003
THBS1	-8.36142	17.3132	1.73715e-07	-0.593138	-0.354382	5.18696	5.66072
DNAJC6	-8.35943	16.7571	2.22072e-07	-0.455048	-0.271479	2.02132	2.38459
HIVEP1	-8.33157	16.8165	2.26476e-07	-0.320487	-0.190884	3.04066	3.29635
CXADR	-8.30657	13.4206	1.18517e-06	-0.718707	-0.422774	2.26125	2.83199
CHST7	-8.30513	17.263	1.95115e-07	-0.380681	-0.22659	2.71549	3.01912
AK5	-8.30355	13.8238	9.67728e-07	-0.660344	-0.388981	1.33395	1.85861
ZNF704	-8.2885	17.9984	1.47527e-07	-0.423927	-0.252475	3.06195	3.40015
SOX18	-8.201	13.4822	1.32804e-06	-0.388102	-0.226726	4.15522	4.46264
ARHGAP28	-8.06813	15.1168	7.35346e-07	-0.536933	-0.312642	3.0276	3.45239
DAPK2	-8.04242	17.996	2.27627e-07	-0.715658	-0.419196	1.80774	2.37517
SNHG20	-8.0061	17.4355	3.02925e-07	-0.356223	-0.207856	2.031	2.31304
ESM1	-7.99126	17.6561	2.84782e-07	-0.657706	-0.38357	3.36283	3.88347
MAGED1	-7.97871	12.3937	3.1398e-06	-0.202962	-0.11613	4.03712	4.19666
PDE7B	-7.96899	16.6905	4.36673e-07	-0.598882	-0.347871	2.71266	3.18604
FAM43A	-7.90284	17.7847	3.16605e-07	-0.357322	-0.207135	3.98823	4.27046
C2orf27A	-7.79912	17.358	4.48213e-07	-0.461669	-0.265314	1.97402	2.33751
ASB1	-7.79562	11.4229	6.63337e-06	-0.267854	-0.15032	2.75101	2.9601
ARHGAP29	-7.78523	12.1349	4.63014e-06	-0.234456	-0.132019	4.09796	4.2812
FGFRL1	-7.74478	17.451	4.76074e-07	-0.31412	-0.179825	3.12527	3.37224
HOMER3	-7.72084	10.9828	9.22752e-06	-0.232327	-0.129236	3.58018	3.76096
MOV10L1	-7.68052	16.1756	8.73413e-07	-0.379846	-0.215632	2.42273	2.72047
GAB2	-7.63602	11.1383	9.42019e-06	-0.220559	-0.121977	3.38717	3.55843
NMT2	-7.58899	17.9375	5.26747e-07	-0.29082	-0.164687	2.9739	3.20165
AMN1	-7.57292	14.9514	1.71541e-06	-0.240563	-0.134866	2.40793	2.59564
KIAA0040	-7.55604	17.511	6.52207e-07	-0.634716	-0.358111	2.79495	3.29137
LXN	-7.52901	17.5355	6.78739e-07	-0.602905	-0.339447	3.02761	3.49878
FABP4	-7.50049	15.3638	1.62842e-06	-0.505609	-0.282195	3.67196	4.06586
JUN	-7.49596	17.8942	6.34417e-07	-0.398412	-0.223916	3.65806	3.96922
GJA1	-7.49311	15.3596	1.65097e-06	-0.441265	-0.24613	3.99745	4.34114
GPR3	-7.48575	17.6658	7.00708e-07	-0.403339	-0.226368	1.66651	1.98136
RAI14	-7.47925	17.9075	6.51201e-07	-0.293439	-0.1647	4.0976	4.32667
PGF	-7.43351	14.5414	2.53588e-06	-0.62375	-0.345163	3.96287	4.44733
HAGHL	-7.39777	15.4616	1.85488e-06	-0.350808	-0.19419	2.05661	2.32911
TANK	-7.38732	14.9589	2.3023e-06	-0.273821	-0.15117	3.11941	3.3319
ARHGAP18	-7.37426	13.4245	4.4666e-06	-0.460142	-0.25214	3.59324	3.94938
RALA	-7.3515	17.9477	8.13696e-07	-0.326709	-0.181455	3.93357	4.18765
ADM	-7.32279	14.3706	3.23817e-06	-0.653973	-0.358224	2.96506	3.47116
KLHL23	-7.31804	15.1176	2.41966e-06	-0.272173	-0.149454	2.68144	2.89226
P3H3	-7.30326	14.6821	2.94451e-06	-0.199675	-0.109324	3.55291	3.70741
GBA2	-7.29107	15.3122	2.34545e-06	-0.281836	-0.154504	3.50215	3.72032
AC037198.1	-7.16939	17.8599	1.17803e-06	-0.625939	-0.342104	1.74323	2.22725
FOXO1	-7.15942	14.3299	4.26199e-06	-0.301865	-0.162925	3.58278	3.81518
RASA3	-7.15537	16.1849	2.13893e-06	-0.202966	-0.110255	3.51405	3.67066
PDE5A	-7.15128	16.2121	2.13357e-06	-0.392505	-0.213155	1.91509	2.21792
SCARF2	-7.12745	15.5185	2.85539e-06	-0.291784	-0.157744	2.82389	3.04865
TNFAIP8L1	-7.12705	10.629	2.31197e-05	-0.25844	-0.136082	3.56229	3.75955
ZFAND5	-7.09931	11.6469	1.46808e-05	-0.208853	-0.110509	3.7077	3.86738
DCAF16	-7.07687	17.961	1.35822e-06	-0.224878	-0.12191	2.78391	2.9573
APBA2	-7.06792	17.9459	1.38817e-06	-0.323783	-0.175377	2.67986	2.92944
MYL12A	-7.0609	13.9984	5.67888e-06	-0.23461	-0.125288	3.93921	4.11916
CARD19	-7.05363	16.5178	2.28e-06	-0.288958	-0.155669	2.84225	3.06457
AC096921.2	-7.03298	16.0399	2.7887e-06	-0.309915	-0.166378	2.2467	2.48484
TMSB4X	-7.02781	10.9158	2.27893e-05	-0.203124	-0.106168	4.01569	4.17033
FAM89A	-7.00448	14.3423	5.43558e-06	-0.520487	-0.276878	2.40418	2.80286
PFKL	-6.99545	14.9765	4.35006e-06	-0.171338	-0.0913029	3.95822	4.08954
F2R	-6.9858	17.4673	1.88742e-06	-0.240532	-0.129119	4.23948	4.4243
PDE1C	-6.98011	17.8531	1.68925e-06	-0.758806	-0.407543	1.389	1.97218
ABCA4	-6.9328	12.8749	1.08745e-05	-0.573165	-0.300613	1.9855	2.42239
RGL1	-6.91666	14.0179	7.0835e-06	-0.377268	-0.198691	3.16891	3.45689
CHRNA1	-6.91499	15.8765	3.62873e-06	-1.15049	-0.610337	1.75306	2.63348
CUL7	-6.88185	17.9993	1.95005e-06	-0.195087	-0.103832	3.44378	3.59324
MYH10	-6.84431	15.5559	4.58152e-06	-0.330946	-0.17414	4.18078	4.43333
DCUN1D3	-6.83954	14.5411	6.60623e-06	-0.266365	-0.139526	3.10321	3.30616
H6PD	-6.80654	17.0747	2.98693e-06	-0.282346	-0.148761	3.52956	3.74511
PDK1	-6.80596	17.796	2.39938e-06	-0.354128	-0.186962	2.48483	2.75537
GPX8	-6.80566	17.7776	2.41407e-06	-0.262426	-0.138537	3.47734	3.67782
MYO1D	-6.78097	17.5965	2.67248e-06	-0.274555	-0.144505	3.6947	3.90423
AP1B1	-6.75524	16.1539	4.39508e-06	-0.289194	-0.151122	3.81188	4.03204
PLOD1	-6.7298	13.9556	9.78648e-06	-0.279396	-0.144318	4.2345	4.44635
TMEM30A	-6.71956	14.1369	9.31444e-06	-0.282914	-0.146103	4.30797	4.52248
CHSY3	-6.69451	16.3855	4.55731e-06	-0.365881	-0.190144	2.42592	2.70393
ORAI2	-6.67445	14.7246	8.15659e-06	-0.202418	-0.104307	3.61931	3.77267
RASSF7	-6.65095	13.3003	1.41495e-05	-0.277619	-0.141721	2.62526	2.83493
SLC22A23	-6.64279	15.4977	6.64531e-06	-0.516542	-0.266114	2.88107	3.27239
AC127502.2	-6.63807	15.7332	6.20859e-06	-0.345578	-0.178106	1.7289	1.99075
FUT4	-6.63492	15.5574	6.60842e-06	-0.243396	-0.125317	2.54987	2.73422
CTSB	-6.63011	14.2833	1.02426e-05	-0.241898	-0.123813	4.54643	4.72929
BNIP3	-6.61309	12.1756	2.3194e-05	-0.447801	-0.226119	3.03468	3.37164
CCL14	-6.59975	16.9744	4.54019e-06	-0.671296	-0.346037	1.6487	2.15737
AC073869.1	-6.59199	13.9845	1.21169e-05	-0.194781	-0.0991404	2.62606	2.77302
GPX4	-6.52518	11.0153	4.24998e-05	-0.191782	-0.0950488	3.90611	4.04953
CCDC71L	-6.5219	17.8007	4.16234e-06	-0.230682	-0.118204	3.514	3.68844
CPA3	-6.49872	16.8454	5.70694e-06	-0.852824	-0.434576	1.54353	2.18723
SNRK	-6.48857	11.6478	3.43773e-05	-0.185288	-0.0918982	3.95309	4.09169
ASMTL	-6.48839	17.9106	4.31415e-06	-0.285705	-0.145902	2.89266	3.10847
MEGF9	-6.47285	12.3596	2.65762e-05	-0.247454	-0.123118	3.10975	3.29503
RUNX1	-6.47096	17.368	5.18542e-06	-0.288901	-0.147005	2.61652	2.83447
RNF152	-6.46997	13.2453	1.92066e-05	-0.414824	-0.207437	3.10339	3.41452
SOD2	-6.46363	12.3357	2.71953e-05	-0.242829	-0.120667	3.26719	3.44894
CDR2	-6.4394	16.8986	6.28971e-06	-0.277947	-0.140714	3.1917	3.40103
MAST4	-6.43843	12.5296	2.62487e-05	-0.228697	-0.113452	3.61311	3.78418
CLEC2B	-6.4167	16.0844	8.31543e-06	-0.504014	-0.253769	2.27075	2.64964
RALGDS	-6.40314	13.6301	1.86717e-05	-0.294801	-0.146579	3.43286	3.65355
SLC39A13	-6.39046	17.8711	5.29394e-06	-0.246601	-0.124526	3.35131	3.53688
ZNF775	-6.38983	12.7911	2.56807e-05	-0.216779	-0.107096	2.48401	2.64595
ARHGEF28	-6.38944	17.864	5.31486e-06	-0.385747	-0.194764	3.43148	3.72173
FJX1	-6.38332	17.135	6.55389e-06	-0.315417	-0.158779	2.83893	3.07602
PHF10	-6.37725	11.5524	4.19118e-05	-0.241502	-0.118109	3.25186	3.43166
DDI2	-6.37023	10.7308	5.92401e-05	-0.245137	-0.118954	3.21492	3.39697
PTGIR	-6.36042	16.8231	7.46868e-06	-0.734665	-0.368456	1.20326	1.75482
ID3	-6.35718	8.58511	0.000161745	-0.642501	-0.30341	3.38821	3.86117
CTSS	-6.33906	17.1454	7.11889e-06	-0.312862	-0.156685	2.48774	2.72251
INSIG2	-6.33766	17.9711	5.72909e-06	-0.249196	-0.125102	2.88579	3.07294
TGFB1I1	-6.31794	15.615	1.14498e-05	-0.23146	-0.114982	3.38426	3.55748
KIAA1324L	-6.31562	14.3396	1.70545e-05	-0.397756	-0.196421	3.15283	3.44992
AL391422.3	-6.29166	16.9682	8.1875e-06	-0.261092	-0.129945	2.74152	2.93704
B4GALT2	-6.26799	16.5295	9.66277e-06	-0.200822	-0.0995102	3.35708	3.50725
GAB1	-6.25732	17.9924	6.69523e-06	-0.466129	-0.231792	3.09535	3.44431
SIX4	-6.25212	14.3244	1.91028e-05	-0.273023	-0.133769	2.34855	2.55195
SLC16A3	-6.2209	17.1085	9.04536e-06	-0.36616	-0.180761	3.66861	3.94207
FADS3	-6.21769	17.9997	7.23882e-06	-0.211759	-0.104797	3.47677	3.63505
TMSB4XP8	-6.20006	13.842	2.43413e-05	-0.326689	-0.158624	1.98768	2.23034
NLRP12	-6.13398	16.303	1.32557e-05	-0.881795	-0.429347	1.2096	1.86517
LRIG1	-6.12712	17.9587	8.78377e-06	-0.397577	-0.19452	3.38594	3.68199
VLDLR	-6.10646	17.1281	1.126e-05	-0.442887	-0.21553	2.65274	2.98195
GPRIN3	-6.10064	17.7719	9.70015e-06	-0.933808	-0.45507	2.25661	2.95104
SLC4A7	-6.0922	16.1692	1.48734e-05	-0.34155	-0.165323	3.3734	3.62684
TVP23C	-6.07849	15.4192	1.87468e-05	-0.278876	-0.134327	1.88158	2.08818
SLC2A10	-6.0762	17.5621	1.07267e-05	-0.212421	-0.103122	2.90349	3.06126
ITPRIPL1	-6.07158	17.9282	9.90543e-06	-0.331719	-0.161131	1.67281	1.91923
FRMD6	-6.0637	12.9968	4.01324e-05	-0.226602	-0.107548	3.50367	3.67074
PPP1R3B	-6.06142	17.5548	1.10695e-05	-0.325567	-0.157743	3.52136	3.76301
STX6	-6.06136	10.1884	0.00011267	-0.182641	-0.0846365	3.46283	3.59647
MAGI1	-6.06079	15.9798	1.66058e-05	-0.328954	-0.158454	3.46973	3.71343
KCNJ15	-6.03304	14.8102	2.4198e-05	-0.644058	-0.307501	1.45206	1.92784
FBXL12	-6.02742	11.7264	6.56752e-05	-0.232403	-0.108759	2.616	2.78658
CHST14	-5.99876	11.9085	6.43074e-05	-0.171161	-0.0798963	3.34231	3.46784
PPP2R3A	-5.99042	17.9437	1.16452e-05	-0.33821	-0.162548	3.03117	3.28155
LOX	-5.98644	17.3441	1.35398e-05	-0.447289	-0.214429	3.48032	3.81118
SYDE1	-5.98508	16.2286	1.79491e-05	-0.236983	-0.113119	3.03701	3.21206
BASP1	-5.98458	17.995	1.16452e-05	-0.235605	-0.113165	3.56261	3.73699
TADA3	-5.9823	10.821	9.79571e-05	-0.181288	-0.083625	3.19721	3.32967
PFKP	-5.98055	17.8336	1.2193e-05	-0.289479	-0.138894	3.83479	4.04898
ZBED1	-5.97937	13.965	3.40795e-05	-0.206109	-0.0972643	3.36651	3.5182
ITM2C	-5.96952	17.2829	1.42139e-05	-0.336947	-0.16113	2.73572	2.98476
LINC00702	-5.95887	15.5047	2.28275e-05	-0.967933	-0.458979	0.906204	1.61966
SMOC1	-5.9569	12.8962	4.93123e-05	-0.797356	-0.372677	1.43219	2.0172
NRP1	-5.95146	17.7853	1.30846e-05	-0.345941	-0.165309	4.04865	4.30427
TMEM134	-5.94695	16.7864	1.67805e-05	-0.190664	-0.0907344	2.64922	2.78992
FAAP20	-5.94386	14.1011	3.48001e-05	-0.200637	-0.0942878	3.13325	3.28071
FHL2	-5.94314	17.9009	1.29566e-05	-0.255163	-0.121839	3.60104	3.78954
ZBTB18	-5.94009	17.0694	1.58703e-05	-0.250536	-0.119239	3.01852	3.20341
AVL9	-5.93769	8.53909	0.000268937	-0.194407	-0.0864997	3.1732	3.31366
PYCR1	-5.93664	16.4549	1.85958e-05	-0.286309	-0.135886	3.27522	3.48632
TNFRSF10C	-5.92812	17.2187	1.56791e-05	-0.421305	-0.200293	3.46081	3.77161
IFT122	-5.9274	10.7282	0.000109682	-0.205944	-0.0941619	2.73856	2.88861
C20orf204	-5.92489	17.923	1.33823e-05	-0.438186	-0.208726	2.28538	2.60884
PDGFRL	-5.92198	15.7717	2.27841e-05	-0.280577	-0.132524	2.45872	2.66527
N4BP3	-5.91762	15.5685	2.42313e-05	-0.545168	-0.257114	3.37937	3.78051
EDEM1	-5.89245	12.321	6.59317e-05	-0.192412	-0.0887486	3.58194	3.72252
SEC23A	-5.88401	17.1213	1.75245e-05	-0.173217	-0.0818185	3.88991	4.01742
RHOBTB1	-5.87295	13.7843	4.31757e-05	-0.236285	-0.109734	3.14399	3.317
MAML3	-5.8528	17.2247	1.82056e-05	-0.253078	-0.119062	3.28104	3.46711
MYO10	-5.8455	17.7098	1.65291e-05	-0.262791	-0.123715	4.11964	4.31289
KDM4B	-5.8453	12.0746	7.70242e-05	-0.163822	-0.0749001	3.49533	3.61469
ALDOA	-5.83961	14.8434	3.39612e-05	-0.200315	-0.0931151	4.39096	4.53767
MTX2	-5.83532	15.3578	2.98537e-05	-0.201153	-0.0936786	2.91136	3.05877
ACTG1	-5.83338	16.2433	2.39343e-05	-0.200879	-0.0938879	5.07163	5.21902
TNFRSF10B	-5.81552	11.2734	0.000105866	-0.213489	-0.0965103	4.21588	4.37088
MAP2K6	-5.80881	15.1494	3.31157e-05	-0.344808	-0.159807	2.17128	2.42359
CYB561	-5.80814	17.9979	1.67414e-05	-0.325598	-0.152617	3.19267	3.43177
OGFRL1	-5.806	15.4382	3.08801e-05	-0.345736	-0.16039	2.90947	3.16253
SH3BP4	-5.80228	12.7274	6.69064e-05	-0.214183	-0.097777	3.6039	3.75988
TGFBR2	-5.80182	14.6828	3.79812e-05	-0.236042	-0.109031	4.41052	4.58306
PPP1R35	-5.80105	11.6378	9.54555e-05	-0.195696	-0.088562	2.72808	2.87021
WFS1	-5.79906	16.6489	2.31989e-05	-0.251991	-0.117388	3.43313	3.61782
CREB3L2	-5.79768	17.9048	1.74613e-05	-0.228575	-0.106945	3.77341	3.94117
ABL1	-5.79291	13.2908	5.72499e-05	-0.187521	-0.0858121	3.8082	3.94486
SULT1C4	-5.79256	17.9904	1.73193e-05	-0.438449	-0.205048	2.68219	3.00394
CHST1	-5.78329	11.7167	9.55196e-05	-0.696259	-0.314456	3.45292	3.95828
GPX1	-5.77907	17.9608	1.7926e-05	-0.303209	-0.14151	3.65397	3.87633
LINC01094	-5.77455	16.345	2.61726e-05	-0.511727	-0.237242	1.64615	2.02064
ZNF70	-5.77022	17.9966	1.81167e-05	-0.191011	-0.0890429	2.58567	2.72569
ZNF275	-5.76271	9.40174	0.000230377	-0.217558	-0.095473	2.94158	3.09809
SPTBN2	-5.76016	17.7077	1.96999e-05	-0.295906	-0.137604	3.01865	3.23541
MEX3D	-5.75641	14.5973	4.21867e-05	-0.199284	-0.0913942	3.64787	3.79321
ARHGEF1	-5.74605	11.8897	9.55683e-05	-0.195726	-0.0880222	3.49795	3.63983
PYCARD	-5.74335	11.7551	0.0001003	-0.303324	-0.136199	2.44425	2.66401
PGM3	-5.74194	17.9844	1.92643e-05	-0.221412	-0.102784	3.37019	3.53229
TSPAN4	-5.7387	16.4183	2.75857e-05	-0.198099	-0.0913836	3.11044	3.25518
ZDBF2	-5.73706	17.8338	2.01017e-05	-0.210248	-0.0974816	2.99025	3.14412
FOCAD	-5.73258	16.4323	2.7826e-05	-0.177647	-0.0818791	3.42665	3.55641
AC007743.1	-5.71834	17.6969	2.15217e-05	-0.319551	-0.147679	2.52981	2.76343
ZNF618	-5.71716	14.5243	4.61762e-05	-0.245793	-0.112015	3.66066	3.83957
ATP6V1A	-5.71406	13.3981	6.34112e-05	-0.148376	-0.0671393	3.57109	3.67885
ZNF532	-5.70811	13.5864	6.07047e-05	-0.228469	-0.10341	3.39312	3.55906
PYCR3	-5.69592	12.1119	9.62905e-05	-0.206928	-0.0925054	2.39458	2.5443
RNF19A	-5.69571	8.65678	0.00034178	-0.42723	-0.183281	3.32222	3.62747
LONP1	-5.68369	15.3736	3.94811e-05	-0.148106	-0.0674433	3.47441	3.58219
CCL2	-5.67796	16.6119	2.97247e-05	-0.601916	-0.275358	3.14113	3.57976
AFMID	-5.64309	12.2151	0.000101446	-0.285278	-0.126572	2.62329	2.82922
PCDH19	-5.63574	12.7048	8.85487e-05	-0.450954	-0.2006	2.40318	2.72896
RAI1	-5.62987	16.5888	3.28726e-05	-0.165693	-0.0752337	3.56978	3.69024
TSPAN13	-5.62609	14.5616	5.39315e-05	-0.422385	-0.189835	3.00541	3.31152
CXCL3	-5.62426	13.7343	6.73803e-05	-0.571942	-0.255737	1.06017	1.47401
C8orf82	-5.62222	15.6422	4.15528e-05	-0.234375	-0.105851	2.76616	2.93627
PHLDB2	-5.62047	15.1837	4.6593e-05	-0.273684	-0.123296	3.39732	3.59581
GIMAP4	-5.61441	17.3819	2.85109e-05	-0.331579	-0.150663	3.68611	3.92723
AGPAT5	-5.60656	17.5898	2.77315e-05	-0.220272	-0.100041	3.42518	3.58534
BCAR1	-5.59973	17.278	3.00377e-05	-0.230229	-0.104331	4.00978	4.17706
SPATA2L	-5.59607	13.7789	6.99395e-05	-0.220487	-0.0981717	2.57169	2.73102
RBM24	-5.59094	17.4152	2.9708e-05	-0.827226	-0.374544	1.56885	2.16974
TMEM120B	-5.57437	16.4571	3.77982e-05	-0.187359	-0.0842862	2.75959	2.89541
MAGED2	-5.57258	13.4682	7.92839e-05	-0.208593	-0.0923392	4.01296	4.16343
YPEL2	-5.57105	17.8443	2.83267e-05	-0.229308	-0.103662	3.62718	3.79366
GNG11	-5.56672	17.5185	3.05618e-05	-0.261086	-0.117807	4.24168	4.43113
ARFGAP1	-5.56306	15.7579	4.52997e-05	-0.169916	-0.0760638	3.47873	3.60172
BACH2	-5.54499	18	2.89938e-05	-0.469115	-0.211311	2.10142	2.44163
F2RL1	-5.53822	17.9325	2.98088e-05	-0.388321	-0.174687	3.25854	3.54004
CRIM1	-5.52495	13.666	8.16709e-05	-0.360621	-0.158597	4.32185	4.58146
ZNF22	-5.5231	10.1668	0.000238852	-0.20281	-0.0863965	3.31232	3.45692
GOLGA3	-5.52133	17.9976	3.04903e-05	-0.165874	-0.0744334	3.69306	3.81321
GUCY1A2	-5.52062	17.9694	3.07066e-05	-0.815578	-0.365901	1.20904	1.79978
CXCR4	-5.5183	15.4866	5.25783e-05	-1.06779	-0.473924	3.14431	3.91517
EPOP	-5.51234	11.8582	0.000139443	-0.227018	-0.0982727	2.55475	2.7174
LIMCH1	-5.49926	17.9998	3.19288e-05	-0.448799	-0.200675	3.08431	3.40905
ENPP2	-5.49039	12.1847	0.000130997	-0.853388	-0.369078	1.83474	2.44597
CD93	-5.47302	17.9246	3.42457e-05	-0.440712	-0.196162	4.53201	4.85045
EGR1	-5.46912	11.4975	0.000166736	-1.28039	-0.548315	2.05771	2.97207
BNIP3L	-5.46021	17.9265	3.51702e-05	-0.264101	-0.117305	3.76319	3.95389
CTNNBIP1	-5.45192	16.3122	4.97497e-05	-0.422813	-0.186326	3.10759	3.41216
MARCKS	-5.44793	14.8404	6.99106e-05	-0.14997	-0.0655651	4.48083	4.5886
HBEGF	-5.44207	16.9016	4.48266e-05	-0.340585	-0.150222	2.84627	3.09167
VKORC1L1	-5.44204	15.3705	6.24825e-05	-0.25394	-0.11122	3.27835	3.46093
NT5DC2	-5.44079	17.8411	3.72518e-05	-0.294304	-0.130258	3.83007	4.04235
NUMBL	-5.4318	17.9648	3.70701e-05	-0.239589	-0.10593	3.06714	3.2399
DAB2	-5.42486	17.1825	4.38537e-05	-0.24702	-0.108763	3.92841	4.1063
KRT10	-5.41997	16.209	5.41939e-05	-0.243442	-0.106653	2.62495	2.8
PDP1	-5.41897	12.1055	0.000150559	-0.200169	-0.0854432	3.10666	3.24946
ANO7	-5.41483	17.6831	4.0563e-05	-0.269116	-0.118522	2.0379	2.23172
HIC2	-5.40783	11.2512	0.000197903	-0.217121	-0.0917517	2.52928	2.68371
ANGPTL2	-5.40782	17.9093	3.9415e-05	-0.188846	-0.0831412	3.29083	3.42683
USP31	-5.40404	12.0431	0.000157062	-0.29228	-0.124364	3.28748	3.49581
CCDC71	-5.39244	16.3295	5.58006e-05	-0.163482	-0.0713248	2.75465	2.87206
PTPRF	-5.38306	13.4819	0.000109952	-0.251925	-0.108	4.20603	4.386
LAMA4	-5.38152	11.5187	0.000190038	-0.252847	-0.106629	4.53	4.70974
NORAD	-5.37779	11.8549	0.000173076	-0.182236	-0.0770455	3.94649	4.07613
NFYA	-5.37612	13.8861	0.000100524	-0.189736	-0.0814597	3.23942	3.37502
NUAK2	-5.36873	17.665	4.48398e-05	-0.397651	-0.173745	1.6881	1.9738
ZBTB42	-5.36102	14.2055	9.55419e-05	-0.242161	-0.1039	2.36544	2.53847
TMEM9	-5.35673	15.2163	7.61606e-05	-0.146506	-0.0631762	3.06616	3.171
ZNF395	-5.35151	16.4244	5.93842e-05	-0.406187	-0.176034	2.80275	3.09386
MIR210HG	-5.34837	15.5297	7.22153e-05	-0.590413	-0.254638	1.96876	2.39128
APLN	-5.34811	15.1365	7.88204e-05	-0.834425	-0.35912	3.50161	4.09838
P4HA3	-5.34394	16.4191	6.03602e-05	-0.585574	-0.253434	3.09198	3.51149
AC078883.1	-5.33392	17.5586	4.92236e-05	-0.462969	-0.200981	2.0221	2.35407
ZNF217	-5.33163	9.64184	0.000375727	-0.179978	-0.0735081	3.17527	3.30201
YIF1A	-5.32888	17.9396	4.633e-05	-0.179604	-0.0780133	3.21653	3.34534
SVIL	-5.32768	17.9403	4.64427e-05	-0.284899	-0.123724	3.73553	3.93984
XXYLT1	-5.32491	15.89	6.99786e-05	-0.245363	-0.105573	3.52223	3.6977
SH3D19	-5.29953	12.0833	0.000184148	-0.165483	-0.0691084	3.72593	3.84322
CXCL11	-5.28584	17.9903	5.03088e-05	-0.911894	-0.393163	1.13948	1.79201
ETV5	-5.2843	12.8939	0.000151929	-0.172099	-0.072157	3.34098	3.4631
C8orf58	-5.27628	10.5041	0.00030529	-0.249584	-0.102051	2.66856	2.84437
FAM198B	-5.27431	15.9309	7.66738e-05	-0.333204	-0.142098	4.20332	4.44097
CALM1	-5.26522	10.7796	0.000284794	-0.30974	-0.1268	4.29987	4.51814
DACT3	-5.26405	14.7098	0.000101693	-0.53485	-0.226175	1.80128	2.1818
USE1	-5.26235	17.9656	5.31314e-05	-0.174405	-0.0748713	2.42526	2.5499
C4orf3	-5.25897	10.1885	0.000346529	-0.224538	-0.0911298	3.43606	3.59389
FBXO32	-5.25803	15.3177	9.00397e-05	-0.442345	-0.18749	2.32253	2.63744
RGS3	-5.23717	10.1782	0.000358919	-0.275817	-0.111447	3.91715	4.11078
GMFB	-5.23021	17.8095	5.8511e-05	-0.261433	-0.111511	3.19844	3.38491
JMJD4	-5.22907	15.1748	9.81663e-05	-0.178049	-0.0750039	2.76954	2.89606
AL024507.2	-5.22613	17.5135	6.22539e-05	-0.285847	-0.121689	2.13186	2.33563
PDLIM2	-5.22315	14.3717	0.00011846	-0.163746	-0.0685778	2.80182	2.91799
COPA	-5.22096	13.8387	0.000134512	-0.12272	-0.0511966	4.0786	4.16556
FABP5	-5.21946	16.1271	8.21798e-05	-0.355732	-0.150326	1.70812	1.96115
SEC61G	-5.2144	17.68	6.19256e-05	-0.206211	-0.0876561	2.99256	3.13949
CTXN1	-5.21388	17.3878	6.53595e-05	-0.226206	-0.0960321	3.55584	3.71696
COPG1	-5.20181	14.2041	0.00012801	-0.165585	-0.0689946	3.83334	3.95063
RMND5B	-5.20133	16.0403	8.66993e-05	-0.188348	-0.0792895	2.98844	3.12226
CHPF2	-5.19988	14.2951	0.000125847	-0.164216	-0.0684388	3.76815	3.88447
TMEM214	-5.19301	15.7261	9.38859e-05	-0.171681	-0.0720452	3.55359	3.67545
SAT1	-5.18272	17.9297	6.33909e-05	-0.405078	-0.171347	3.69104	3.97926
GMIP	-5.17881	17.2974	7.15095e-05	-0.194458	-0.0819843	2.93136	3.06958
NFE2L3	-5.17769	16.6341	8.10422e-05	-0.195472	-0.0821542	3.28331	3.42212
NAGLU	-5.17133	17.9708	6.44952e-05	-0.187257	-0.0790525	3.21193	3.34508
EGLN1	-5.16916	15.2053	0.000109481	-0.249567	-0.103964	3.59773	3.77449
KCNC4	-5.16701	17.9189	6.56826e-05	-0.290621	-0.122564	2.97157	3.17816
CAVIN4	-5.16558	15.9523	9.47493e-05	-0.315625	-0.131914	2.06567	2.28944
PPP4C	-5.16485	11.9458	0.00023859	-0.15748	-0.0640006	3.61636	3.7271
CBARP	-5.16233	10.9394	0.000317782	-0.230004	-0.0924369	2.84471	3.00593
EXTL3	-5.16163	10.8711	0.000324588	-0.175418	-0.0704323	3.70664	3.82956
MAP1S	-5.15712	17.7985	6.85003e-05	-0.250291	-0.105308	3.59129	3.76909
P3H1	-5.15286	15.9171	9.7858e-05	-0.173092	-0.072154	3.81257	3.9352
MMD	-5.1463	17.2489	7.72238e-05	-0.224907	-0.0942192	2.59122	2.75078
RGP1	-5.14221	16.6159	8.74432e-05	-0.220466	-0.0920263	3.30248	3.45873
SLC38A1	-5.14129	16.8938	8.32188e-05	-0.239881	-0.10024	3.66596	3.83602
P2RX4	-5.13461	14.2908	0.000142207	-0.311967	-0.12838	2.7968	3.01698
DDHD2	-5.13321	17.9919	6.97455e-05	-0.214999	-0.0901171	3.2187	3.37126
FAM214A	-5.13193	12.2672	0.000231545	-0.213618	-0.086505	3.06419	3.21425
COMT	-5.11904	17.7019	7.55455e-05	-0.163193	-0.0681371	3.54158	3.65724
SEC24A	-5.10144	17.9994	7.45854e-05	-0.22695	-0.0945475	3.40623	3.56698
TTC3	-5.09731	11.3668	0.000311711	-0.1322	-0.0526822	3.93025	4.02269
PGM2L1	-5.09271	16.8301	9.30928e-05	-0.260374	-0.10775	3.54436	3.72843
SP4	-5.0922	10.862	0.000362315	-0.176419	-0.0698218	2.61357	2.73669
PAM	-5.08959	15.623	0.000117551	-0.192528	-0.0791477	3.91611	4.05195
SLC35E3	-5.08877	12.5	0.000234817	-0.196795	-0.0791627	2.5775	2.71548
ZNF267	-5.08342	11.518	0.000305836	-0.249528	-0.0993134	2.83343	3.00785
ARHGAP1	-5.08155	11.3251	0.000323357	-0.166725	-0.0661928	3.34855	3.46501
ARHGEF9	-5.07354	11.8125	0.000287302	-0.243552	-0.0970317	2.5853	2.75559
GRAP	-5.07285	13.4086	0.000194191	-0.239849	-0.0968867	3.0894	3.25777
CTHRC1	-5.07275	17.9864	7.9516e-05	-0.52513	-0.217533	2.40681	2.77814
PEG10	-5.07085	14.7374	0.000145758	-0.466891	-0.190245	3.2905	3.61907
ITGBL1	-5.0678	17.2396	9.12048e-05	-0.402122	-0.165896	1.78146	2.06546
MAN2A1	-5.06581	17.0554	9.45779e-05	-0.213324	-0.0879004	3.60489	3.7555
C2CD4B	-5.06215	17.9155	8.2314e-05	-0.467349	-0.193137	2.70173	3.03197
DAPK3	-5.06025	14.8235	0.000146121	-0.137027	-0.0557446	3.65094	3.74732
ZDHHC9	-5.05975	11.708	0.000302089	-0.148877	-0.0590791	3.36446	3.46843
AJUBA	-5.05062	15.2803	0.000135769	-0.264465	-0.107669	3.05326	3.23933
SEMA6B	-5.04988	17.9944	8.34288e-05	-0.253484	-0.104533	4.26516	4.44417
UGCG	-5.04474	17.9655	8.47587e-05	-0.270805	-0.111549	2.9584	3.14958
WASF3	-5.04221	17.5833	9.0793e-05	-0.313297	-0.128784	3.38874	3.60978
RHOB	-5.0419	16.6049	0.000107658	-0.381673	-0.156191	4.36495	4.63389
ACBD3	-5.04169	17.233	9.64627e-05	-0.176664	-0.0725019	3.2848	3.40938
OCLN	-5.03094	11.0956	0.000373354	-0.370356	-0.145091	2.22451	2.48223
C19orf12	-5.02515	12.2118	0.000281151	-0.199438	-0.078961	2.87722	3.01642
SCN5A	-5.02133	17.9156	8.98764e-05	-0.336282	-0.137842	2.61949	2.85656
SIRPB2	-5.01857	17.1308	0.000103059	-0.494045	-0.201716	2.10554	2.45342
B4GALT7	-5.01503	11.9285	0.000307164	-0.165387	-0.0651583	3.01727	3.13254
FEZ2	-5.01162	17.1115	0.000104919	-0.164816	-0.0671924	3.34736	3.46337
THSD4	-5.00964	15.3035	0.000146444	-0.257336	-0.103904	3.28739	3.46801
KIAA1191	-5.00792	12.878	0.000246498	-0.163387	-0.0648379	3.69479	3.8089
CNN3	-5.00763	11.0461	0.000392694	-0.181744	-0.0708007	3.85471	3.98098
GVINP1	-5.00643	14.7091	0.000165805	-0.378645	-0.152236	1.89875	2.16419
R3HDM4	-4.9895	13.112	0.000241225	-0.168064	-0.0665625	3.17999	3.2973
DPYSL2	-4.9887	15.5397	0.00014586	-0.169816	-0.0683606	3.84585	3.96494
DTNA	-4.98332	17.9217	9.7465e-05	-0.204173	-0.0830463	2.43269	2.5763
RNF216P1	-4.98133	10.0937	0.000537048	-0.168468	-0.0644261	2.63549	2.75193
FAM114A1	-4.97901	16.8848	0.000116774	-0.181374	-0.0733714	3.60932	3.73669
CPT2	-4.97757	14.4745	0.000183738	-0.202959	-0.0809854	2.55841	2.70038
FRMD4A	-4.9755	17.1965	0.00011159	-0.279997	-0.113348	3.59442	3.79109
RNF144B	-4.9744	12.0047	0.000322498	-0.217681	-0.085077	3.41099	3.56237
ZC3HAV1L	-4.96736	12.1501	0.000314806	-0.218556	-0.0854107	2.61144	2.76342
MAML2	-4.96393	14.3879	0.000191914	-0.260959	-0.103768	2.75535	2.93771
ARVCF	-4.96014	17.9927	0.000101329	-0.275986	-0.111751	3.44848	3.64235
PRRC1	-4.93824	15.7944	0.000153864	-0.157679	-0.0628916	3.47631	3.58659
CTNNB1	-4.93481	12.5886	0.0002997	-0.161065	-0.0627545	4.33973	4.45164
CSRNP1	-4.93472	10.181	0.000561188	-0.400339	-0.151686	2.86517	3.14118
MYO1E	-4.92985	13.1352	0.000266898	-0.198071	-0.0774557	3.55221	3.68997
HK2	-4.92951	17.9737	0.000108611	-0.352281	-0.14172	2.7424	2.9894
RNF144A	-4.92587	16.1379	0.000148348	-0.420631	-0.167638	3.16429	3.45842
NUDT16	-4.92207	11.8393	0.000366808	-0.202646	-0.0781577	3.11402	3.25443
NMRK1	-4.91741	15.076	0.000183257	-0.245226	-0.0969675	2.79783	2.96893
LAMB1	-4.90171	14.9644	0.000193012	-0.197469	-0.0777628	4.58898	4.72659
RBM12	-4.89771	15.0073	0.00019294	-0.178538	-0.0702653	3.45163	3.57603
NLRX1	-4.89645	17.36	0.000128458	-0.269774	-0.107478	2.6047	2.79332
UACA	-4.8959	9.19798	0.000800096	-0.372161	-0.13746	3.4256	3.68041
SMS	-4.89299	17.6616	0.000123388	-0.271057	-0.108053	3.14269	3.33224
UNC13B	-4.88457	11.3266	0.000444005	-0.198976	-0.0756595	3.50882	3.64614
ULK2	-4.86301	14.1213	0.000245027	-0.194443	-0.0754881	2.82429	2.95925
APBB2	-4.85168	9.76666	0.000716681	-0.17618	-0.0650397	3.83446	3.95507
AP000695.1	-4.82341	18	0.000136257	-0.246677	-0.0969877	2.46784	2.63967
LINC01013	-4.82122	17.5075	0.000147432	-0.538746	-0.211259	2.89695	3.27195
GMFG	-4.81355	17.9128	0.000141025	-0.705333	-0.276606	1.91054	2.40151
CTTN	-4.81242	16.0946	0.000188384	-0.17206	-0.0668631	3.98159	4.10105
ROBO4	-4.81	17.9184	0.000142003	-0.207002	-0.0811161	4.15191	4.29597
XYLT1	-4.80518	15.9282	0.000196645	-0.359714	-0.139427	2.32052	2.57009
AC019069.1	-4.80372	17.1288	0.000162251	-0.224703	-0.0876115	1.61411	1.77026
MEX3A	-4.8021	13.0267	0.000343575	-0.255103	-0.0968152	3.35475	3.53071
GPSM1	-4.79158	11.7932	0.000461645	-0.178642	-0.0668122	3.31334	3.43606
COL4A1	-4.78652	17.9593	0.000148558	-0.299713	-0.116845	4.67027	4.87855
CARD16	-4.78264	12.5034	0.00039846	-0.216024	-0.0812144	2.41418	2.5628
MIR155HG	-4.78054	13.2743	0.00033911	-0.260205	-0.0984606	1.76562	1.94495
BEND3	-4.78028	11.0076	0.000570059	-0.187891	-0.0694249	2.42728	2.55594
ALDOC	-4.77837	17.4645	0.000162697	-0.391473	-0.151997	2.27774	2.54948
CDC42EP1	-4.77829	13.1083	0.000352485	-0.19798	-0.0747681	3.63412	3.77049
LEPROT	-4.77481	13.2604	0.000343655	-0.211102	-0.0797621	3.48497	3.6304
NUDT22	-4.76747	12.2562	0.000432311	-0.202809	-0.0757825	2.65181	2.7911
CSNK1G2	-4.76543	11.018	0.000582319	-0.128283	-0.047234	3.59306	3.68082
BCOR	-4.75755	13.1014	0.000366466	-0.227822	-0.0856079	2.91608	3.0728
AKAP12	-4.75037	17.5968	0.000169444	-0.331058	-0.127791	4.25024	4.47967
CISH	-4.7456	11.5793	0.000524528	-0.332538	-0.122688	1.82079	2.04841
EIF4EBP1	-4.73836	17.9965	0.000164156	-0.257461	-0.0992834	3.33401	3.51238
PALMD	-4.72366	15.2634	0.000259578	-0.291394	-0.110376	3.579	3.77988
EXT1	-4.72293	16.8878	0.000199796	-0.220646	-0.084336	3.41568	3.56818
BET1L	-4.72044	17.5029	0.000183249	-0.178419	-0.0683607	3.20344	3.32683
CDC14A	-4.71778	9.25125	0.00101331	-0.302458	-0.106955	2.46337	2.66807
ACOT9	-4.7169	15.5744	0.000249575	-0.21989	-0.0833173	3.2616	3.41321
CSNK1E	-4.71519	11.0407	0.000628018	-0.158589	-0.0576822	3.44019	3.54833
COL4A2	-4.70441	17.6127	0.000186709	-0.291639	-0.111375	4.62646	4.82797
TBC1D16	-4.70393	16.8062	0.000210568	-0.172241	-0.0655105	3.8756	3.99448
PHACTR1	-4.70358	15.7392	0.000249467	-0.310419	-0.117359	2.46593	2.67981
GPT2	-4.70282	16.7551	0.000212712	-0.146707	-0.0557691	2.99647	3.09771
PXDC1	-4.70086	14.2935	0.000322525	-0.223412	-0.0836041	3.52073	3.67423
TXNDC5	-4.69684	16.8893	0.000211071	-0.498678	-0.189427	3.35064	3.6947
NHSL1	-4.69602	14.3788	0.00032049	-0.248092	-0.0927876	3.32074	3.49118
GPR155	-4.68974	17.7315	0.000189511	-0.250747	-0.0954762	2.09629	2.2694
KDELR3	-4.67907	17.8891	0.000189723	-0.274817	-0.104449	3.15064	3.34027
GBX2	-4.67634	14.5596	0.000322235	-0.264759	-0.0986719	1.79528	1.977
STARD13	-4.67498	15.0941	0.000294355	-0.163474	-0.0611274	3.00415	3.11646
ZNF609	-4.6729	11.3159	0.000629874	-0.160532	-0.0579663	3.73527	3.84452
TPM1	-4.66808	14.8575	0.000310781	-0.292455	-0.108998	3.75302	3.95375
DCP1A	-4.6669	10.7159	0.000735583	-0.155164	-0.0554925	3.23844	3.34376
KIAA2013	-4.66275	11.8203	0.000570611	-0.148535	-0.0538192	3.2613	3.36247
IL17D	-4.64859	14.614	0.000336837	-0.29276	-0.108399	2.39064	2.59122
TXNDC11	-4.64674	16.6615	0.000242751	-0.156576	-0.0586863	3.19492	3.30255
ACSM3	-4.64276	15.9222	0.000274195	-1.08912	-0.406118	2.69918	3.4468
ZFPL1	-4.64159	11.5617	0.000626934	-0.148683	-0.0534155	2.87173	2.97278
BLOC1S4	-4.64149	9.62961	0.00101676	-0.144578	-0.0504598	2.65674	2.75426
CERS1	-4.63934	17.7479	0.000210991	-0.310027	-0.116622	2.30266	2.51599
TPI1P1	-4.63535	15.6497	0.000290711	-0.321582	-0.119495	1.60844	1.82897
PPARD	-4.63513	16.609	0.000250705	-0.179896	-0.0672142	3.14417	3.26772
TMEM165	-4.6269	14.6085	0.000351716	-0.167065	-0.0615182	3.5854	3.69969
CPTP	-4.62213	11.951	0.000594311	-0.157443	-0.0565321	3.25317	3.36016
LIMK1	-4.62145	15.8424	0.000290043	-0.152331	-0.0564731	3.46818	3.57258
FAM49A	-4.61249	14.5244	0.000367038	-0.196789	-0.0721541	3.42685	3.56132
AKT1	-4.60882	16.7407	0.000259881	-0.165838	-0.0615992	3.86195	3.97567
DNAH11	-4.60614	17.8733	0.00022302	-0.560785	-0.209341	0.868456	1.25352
NAV1	-4.60239	17.8515	0.00022552	-0.21447	-0.0799786	3.78888	3.93611
AC009414.2	-4.6021	16.4134	0.000276615	-0.266275	-0.0985608	2.04972	2.23214
IPO9	-4.60107	10.762	0.000808207	-0.139561	-0.0490786	3.71426	3.80858
ZSWIM4	-4.6007	11.9399	0.000618129	-0.14413	-0.0514534	3.30582	3.40361
HNMT	-4.59802	16.9423	0.000258253	-0.529334	-0.196292	1.90187	2.26468
MCEE	-4.59195	17.8507	0.000230759	-0.223511	-0.083131	1.95714	2.11046
SHANK1	-4.59095	16.7986	0.00026763	-0.525437	-0.19435	1.75294	2.11283
EPHX4	-4.57961	16.7058	0.000277818	-0.338732	-0.124867	2.50251	2.73431
SEC24D	-4.57926	17.8548	0.000237133	-0.174714	-0.0647747	3.76971	3.88945
SLC2A8	-4.57652	14.3728	0.000404028	-0.202408	-0.0734437	2.4283	2.56623
SPRY4	-4.57313	9.86705	0.00105722	-0.510424	-0.175576	2.84706	3.19006
KDM3A	-4.56862	16.3383	0.000299963	-0.180352	-0.0661592	3.3834	3.50666
CNOT6L	-4.56783	10.5677	0.000893464	-0.182039	-0.0632534	3.15334	3.27598
ARHGEF37	-4.56446	17.1565	0.000269199	-0.291639	-0.107346	2.63517	2.83466
NARF	-4.56069	17.9663	0.000243394	-0.155498	-0.0574079	3.5223	3.62876
CTSZ	-4.55633	17.9714	0.000245576	-0.231581	-0.0854032	3.82647	3.98496
LACTB	-4.55097	12.9572	0.000548668	-0.154856	-0.0551377	3.11262	3.21761
ZSCAN9	-4.55061	10.4307	0.00094939	-0.238085	-0.0821569	2.42251	2.58263
DNMBP	-4.54352	17.2206	0.000279105	-0.205896	-0.0754012	3.68717	3.82781
NEDD1	-4.54214	16.881	0.00029338	-0.183272	-0.0669718	2.89589	3.02101
PLS3	-4.54098	14.0116	0.000460642	-0.197073	-0.070638	4.24787	4.38172
ANO6	-4.54011	10.4824	0.000953262	-0.182401	-0.0628074	3.95611	4.07871
GRIK4	-4.54009	17.0443	0.000288057	-0.666903	-0.243784	0.800082	1.25543
GOLGA5	-4.53896	10.7158	0.000903173	-0.140462	-0.0485237	3.27737	3.37186
POFUT2	-4.52527	16.8723	0.000304468	-0.213802	-0.0777796	3.32043	3.46622
TRIM44	-4.52219	10.1264	0.00107012	-0.125329	-0.0426858	3.75194	3.83595
MGST2	-4.51949	17.5669	0.000280661	-0.290978	-0.106077	3.09695	3.29548
SDHAF2	-4.51588	16.4432	0.000329895	-0.164102	-0.0594082	2.4676	2.57936
NME4	-4.5127	17.4392	0.000289671	-0.163162	-0.0593368	3.55206	3.66331
DPF3	-4.51231	17.8845	0.000273585	-0.385352	-0.140434	1.94202	2.20491
NDEL1	-4.51136	14.795	0.000427657	-0.143206	-0.0512311	3.22759	3.32481
C7orf49	-4.50829	17.1764	0.000302881	-0.162337	-0.0588878	2.66058	2.77119
HGSNAT	-4.50628	13.2037	0.000568499	-0.167131	-0.0589258	3.62224	3.73526
PMM2	-4.50391	12.4401	0.000660501	-0.20904	-0.0730903	2.73127	2.87234
SCHIP1	-4.50363	17.6713	0.0002866	-0.455929	-0.165601	1.97955	2.29032
SLC52A2	-4.50339	17.9639	0.000276198	-0.197672	-0.0718953	3.23224	3.36702
YDJC	-4.50009	17.9937	0.000277164	-0.204382	-0.0742814	2.58769	2.72702
ALAD	-4.49417	10.7598	0.000961135	-0.14829	-0.0506128	3.0363	3.13575
VOPP1	-4.49257	17.8721	0.000286168	-0.191005	-0.0692405	3.12226	3.25238
SAR1A	-4.48737	16.3824	0.000353262	-0.171011	-0.0614166	3.53519	3.65141
ARSG	-4.48483	17.2175	0.00031682	-0.307013	-0.110697	1.71119	1.92005
PPP6R2	-4.48413	11.0882	0.000907043	-0.147546	-0.0504541	3.40624	3.50524
BMP2K	-4.47909	10.5741	0.00102825	-0.262936	-0.0890964	3.1054	3.28142
SEMA6D	-4.46799	17.7917	0.000305126	-0.503352	-0.181196	2.33021	2.67248
TMEM101	-4.46406	12.7511	0.000668227	-0.186568	-0.0647174	2.77498	2.90062
GCN1	-4.46109	16.8408	0.000350556	-0.20831	-0.0744743	3.63842	3.77982
BCL2L11	-4.45985	17.8116	0.000309847	-0.416743	-0.149702	2.90292	3.18614
PRDX5	-4.4541	11.3359	0.000903504	-0.142237	-0.0483824	3.58468	3.67999
TWSG1	-4.45177	10.1878	0.00117683	-0.17286	-0.0577342	3.59255	3.70785
MPP4	-4.45164	17.8363	0.000314514	-0.63444	-0.227422	1.70562	2.13655
CCNJL	-4.45132	13.6858	0.000578104	-0.155664	-0.0542855	3.04862	3.1536
MS4A6A	-4.45124	14.7177	0.000487604	-0.76613	-0.269429	1.9013	2.41908
GRAMD1A	-4.44805	16.7743	0.000363668	-0.15281	-0.0544167	3.81437	3.91798
TP53I13	-4.43535	11.3957	0.000920786	-0.171927	-0.0582075	2.88713	3.0022
DNAJC5	-4.43246	13.0784	0.000666527	-0.133693	-0.0461105	3.79554	3.88544
XYLT2	-4.42849	11.5175	0.000908108	-0.125903	-0.0426086	3.07282	3.15708
E2F4	-4.42201	14.3109	0.000551038	-0.151695	-0.0527402	3.39893	3.50115
KRT80	-4.41483	17.7957	0.000342733	-0.458686	-0.162726	2.2993	2.61
EIF2AK3	-4.41314	17.7906	0.000344223	-0.213887	-0.075842	3.01322	3.15809
SYCE1L	-4.40633	17.9978	0.000340754	-0.232925	-0.0825203	2.14231	2.30003
FAM168B	-4.40622	11.904	0.000872388	-0.148072	-0.0500271	3.80289	3.90194
RAPGEF2	-4.40262	10.6705	0.00113821	-0.184974	-0.0613595	3.57064	3.69381
IDH2	-4.39479	17.9894	0.000349908	-0.232971	-0.0822663	3.51456	3.67218
TMEM65	-4.3898	14.3224	0.000585662	-0.213718	-0.0736234	3.2487	3.39237
MSR1	-4.38914	12.4305	0.000812359	-0.907451	-0.306929	1.23188	1.83907
HDAC3	-4.37886	13.7954	0.000651366	-0.148143	-0.0506419	3.14198	3.24137
BCKDK	-4.37626	8.80849	0.00187472	-0.120934	-0.0383328	3.45332	3.53295
CSGALNACT1	-4.37201	16.498	0.00044331	-0.403408	-0.14038	3.54311	3.815
PXDN	-4.37131	12.2079	0.000874555	-0.295713	-0.0992306	4.58397	4.78145
PLEKHJ1	-4.37078	16.3306	0.000454442	-0.183934	-0.0639185	2.9664	3.09032
TMED3	-4.36943	17.8233	0.000377474	-0.151193	-0.0529611	3.61123	3.7133
NOL4L	-4.3678	15.7364	0.000495927	-0.222371	-0.0769151	3.69001	3.83966
CTGF	-4.36611	17.519	0.000394442	-0.652906	-0.228127	4.37189	4.81241
DPY19L3	-4.3634	14.9573	0.00055978	-0.212509	-0.0730054	3.23766	3.38042
SIVA1	-4.35353	15.3326	0.000540636	-0.125947	-0.0432606	3.08907	3.17367
SMCO4	-4.35211	17.336	0.000415851	-0.205788	-0.071542	2.3106	2.44926
HLX	-4.34606	15.937	0.000504595	-0.489969	-0.168621	2.67078	3.00008
WWP1	-4.34555	14.2727	0.000643492	-0.167679	-0.0569899	3.25607	3.3684
RWDD2A	-4.34364	17.7819	0.000401492	-0.196108	-0.0681701	2.54391	2.67605
SPECC1	-4.3409	13.7465	0.000705996	-0.20025	-0.0676529	2.80419	2.93814
PRNP	-4.33922	15.4233	0.000549478	-0.205781	-0.070429	3.37958	3.51768
GCAT	-4.33916	11.3434	0.00109583	-0.176146	-0.0578773	2.59772	2.71473
POU2F2	-4.339	17.9961	0.00039558	-0.446923	-0.155317	2.10555	2.40667
PCYT2	-4.3349	12.7483	0.000845761	-0.229155	-0.0765136	2.85381	3.00664
ARHGAP45	-4.33099	15.05	0.000589358	-0.303874	-0.103464	2.16798	2.37165
ENTPD7	-4.32762	16.7147	0.000473638	-0.191626	-0.0659086	2.97718	3.10595
TPI1	-4.32738	14.6532	0.000629295	-0.23401	-0.0793474	3.85956	4.01624
ARHGDIA	-4.32643	16.9332	0.00046199	-0.183444	-0.0631529	4.21477	4.33807
USP6NL	-4.32157	12.1172	0.000971731	-0.176357	-0.0582176	3.30641	3.4237
SIPA1L2	-4.31763	11.1897	0.00117271	-0.330928	-0.107761	3.09131	3.31065
ADAMTS7	-4.31238	17.9183	0.000423375	-0.198814	-0.0685272	3.63956	3.77323
FBXL6	-4.31157	17.7483	0.000432552	-0.178028	-0.0612936	2.70235	2.82201
BAIAP3	-4.30846	17.4985	0.000448464	-0.48778	-0.16756	1.30437	1.63204
CXorf40B	-4.30811	12.812	0.000878429	-0.195255	-0.0647012	2.42161	2.55159
FYN	-4.29718	10.6769	0.00135036	-0.158297	-0.0508016	3.69095	3.7955
CDK5R1	-4.29673	14.5968	0.00067435	-0.303674	-0.101966	2.21508	2.4179
CMTM7	-4.29337	17.0706	0.000487746	-0.200045	-0.0682454	3.02636	3.16051
ABCB9	-4.28716	17.8047	0.000453485	-0.203133	-0.0694491	2.58966	2.72595
PHGDH	-4.28651	17.7566	0.000456644	-0.487024	-0.166434	2.28505	2.61178
VEGFB	-4.28147	17.8647	0.000456088	-0.16024	-0.0547078	3.3628	3.47028
DYNLT1	-4.27864	17.7895	0.000462893	-0.186542	-0.0636078	3.15122	3.27629
HERC1	-4.27811	16.8974	0.000514748	-0.20418	-0.0692644	3.57926	3.71598
PPARA	-4.27396	15.8545	0.000592563	-0.235446	-0.0792427	2.99354	3.15089
AC092807.3	-4.2692	16.3284	0.00056297	-0.385561	-0.129982	1.36648	1.62425
RCN3	-4.2679	15.2813	0.000648114	-0.251592	-0.0841742	3.46587	3.63376
SLC19A1	-4.26455	17.7592	0.000479136	-0.17527	-0.059499	3.02921	3.14659
SLC29A4	-4.25922	17.9998	0.000471915	-0.289388	-0.0982031	2.55764	2.75144
CCDC85B	-4.24993	12.6785	0.00100006	-0.197315	-0.0640911	3.54894	3.67965
MAP4K4	-4.24952	17.7628	0.000495081	-0.21533	-0.072763	4.48116	4.62521
EXOC6	-4.24818	17.2077	0.000529134	-0.242242	-0.0815713	3.67548	3.83739
NAMPT	-4.24733	11.5872	0.00122306	-0.223433	-0.0715246	3.44821	3.59569
LINC01235	-4.24289	15.2823	0.000681871	-0.575728	-0.191117	2.82223	3.20565
MPST	-4.2303	13.2049	0.000950288	-0.119256	-0.038711	3.54293	3.62191
ANAPC11	-4.22979	13.1699	0.000956586	-0.163137	-0.0529268	2.97542	3.08345
SPAG4	-4.22312	15.3873	0.000700006	-0.431682	-0.142514	1.99104	2.27813
DLL4	-4.218	12.9589	0.00101207	-0.399139	-0.128703	3.66895	3.93287
NCS1	-4.21358	17.9681	0.000524039	-0.19811	-0.0662709	3.49484	3.62703
CRYBG1	-4.21199	17.4121	0.000559219	-0.57038	-0.190124	2.78357	3.16382
PJA2	-4.2077	13.4889	0.000948144	-0.123567	-0.0399303	3.72133	3.80308
SFXN2	-4.20588	12.2562	0.00116524	-0.269674	-0.0858989	2.09759	2.27538
FBLN1	-4.20197	16.7161	0.000619313	-0.392017	-0.129715	1.97042	2.23128
RAB20	-4.20089	16.3331	0.000649947	-0.255639	-0.0843523	1.39797	1.56796
ERLEC1	-4.19936	17.3588	0.000578307	-0.156145	-0.0518231	3.2266	3.33058
NAT14	-4.19651	17.961	0.000544676	-0.188674	-0.062772	2.82791	2.95364
RPS6KA5	-4.19595	14.2855	0.000861005	-0.255414	-0.0828379	2.4507	2.61983
ANKS3	-4.19358	17.9375	0.000549612	-0.202059	-0.0671538	2.36058	2.49519
SRRM3	-4.19105	16.9564	0.000616452	-0.314845	-0.103969	2.35132	2.56072
HAGLR	-4.19044	15.43	0.000744282	-0.269802	-0.088165	3.3503	3.52929
HS6ST2	-4.17938	15.88	0.00071903	-0.27263	-0.0890584	2.57619	2.75704
BDH1	-4.17748	17.9918	0.000566322	-0.231952	-0.076714	1.97633	2.13067
ELMO3	-4.17624	16.8865	0.000641573	-0.223191	-0.0733191	1.86659	2.01484
AL138828.1	-4.17594	17.1281	0.000624551	-0.568314	-0.186949	0.476222	0.853854
TCF7L1	-4.17162	17.3694	0.000613667	-0.246108	-0.0809598	3.4741	3.63764
DLC1	-4.16889	11.3628	0.00146115	-0.222709	-0.0691952	3.62905	3.775
EFNA1	-4.16618	17.4939	0.000612578	-0.302689	-0.0994676	3.50205	3.70313
IGF2BP2	-4.16414	16.5994	0.000680729	-0.144556	-0.0472143	3.54544	3.64133
PARL	-4.16409	14.245	0.000921986	-0.175701	-0.0563645	2.19649	2.31253
FAM3C2	-4.16359	12.6557	0.00117621	-0.354554	-0.111869	0.874623	1.10783
TCEA2	-4.16295	16.6551	0.000678043	-0.18628	-0.0608398	3.24397	3.36753
CASP1	-4.16004	16.1376	0.000725428	-0.316798	-0.103014	1.90343	2.11333
YIPF1	-4.15921	16.871	0.000666701	-0.205363	-0.0670814	2.6212	2.75742
RFX2	-4.15898	17.973	0.000591258	-0.389121	-0.127912	2.35611	2.61462
COPE	-4.15768	17.2108	0.000643814	-0.155873	-0.0509955	3.38049	3.48392
CD2AP	-4.15608	11.7512	0.0013918	-0.142852	-0.0444357	3.41965	3.51329
STK10	-4.15513	14.2401	0.000939023	-0.248276	-0.0794028	3.324	3.48784
HIP1R	-4.15331	15.351	0.00081141	-0.194818	-0.0628482	3.75161	3.88045
IGF1R	-4.15126	17.7334	0.000616872	-0.210046	-0.0687813	3.59899	3.73841
TMEM121	-4.15047	17.8689	0.000609153	-0.231703	-0.0759105	2.35462	2.50842
KSR2	-4.14821	17.8605	0.000612744	-0.501221	-0.164081	1.76355	2.0962
SLC18B1	-4.14814	13.3344	0.00108729	-0.25641	-0.081087	2.56807	2.73682
SORBS2	-4.14204	17.9837	0.000613254	-0.267853	-0.0875659	3.02136	3.19907
EFNA5	-4.14065	17.4402	0.000651597	-0.205812	-0.0670468	2.95399	3.09042
ATF4	-4.13483	14.7766	0.000908223	-0.143465	-0.0457822	3.65464	3.74926
SLC37A3	-4.13379	13.4503	0.00109794	-0.12843	-0.0404636	3.12388	3.20833
P4HB	-4.13206	15.5258	0.000829067	-0.16305	-0.0522949	4.63002	4.7377
ADSSL1	-4.12988	17.9239	0.000633955	-0.357168	-0.116257	1.83644	2.07315
SEC13	-4.12628	17.9085	0.000640058	-0.174768	-0.0568137	3.73621	3.852
ZNF542P	-4.12501	12.5229	0.0012902	-0.218577	-0.0679386	2.78646	2.92971
DAD1	-4.12428	13.7146	0.00107529	-0.13696	-0.0431254	3.52234	3.61238
DAAM1	-4.12322	17.2245	0.000692877	-0.249859	-0.0808207	3.12086	3.2862
DGUOK	-4.1205	10.9087	0.00172905	-0.142223	-0.04312	2.96319	3.05586
CDC42BPA	-4.11684	12.5466	0.00130465	-0.156832	-0.0486204	3.93885	4.04157
ST3GAL3	-4.11534	18	0.000649674	-0.152159	-0.0493081	2.62135	2.72209
ZNF365	-4.11191	17.8164	0.000667102	-0.46446	-0.150184	1.28446	1.59178
NINL	-4.10833	17.9474	0.000663428	-0.228798	-0.0739473	3.00372	3.15509
GRB10	-4.1055	12.1548	0.00142044	-0.25235	-0.0775286	3.96269	4.12763
COL12A1	-4.10373	14.6016	0.000989424	-0.486434	-0.153345	3.51838	3.83827
SNAPC4	-4.10047	16.468	0.000791559	-0.146257	-0.0467198	3.06558	3.16207
TMEM243	-4.10012	15.5445	0.000883509	-0.204398	-0.0648532	2.72558	2.86021
PROB1	-4.09937	17.6311	0.000699124	-0.328302	-0.105596	1.96053	2.17748
TMEM203	-4.09661	12.1599	0.00144217	-0.118866	-0.0364044	2.89469	2.97232
ERG	-4.09624	11.1194	0.00173176	-0.123065	-0.0371118	4.04433	4.12442
CAV2	-4.09489	16.0076	0.000844802	-0.20041	-0.0636913	3.59609	3.72814
APH1B	-4.09479	9.76773	0.00227135	-0.172275	-0.0506051	2.96836	3.0798
CD55	-4.09214	11.7524	0.00155765	-0.264754	-0.080498	3.66839	3.84102
BMP2	-4.08952	17.1398	0.00075241	-0.355663	-0.113677	3.11892	3.35359
CYP27A1	-4.0894	17.1486	0.000751889	-0.226981	-0.0725486	2.72711	2.87687
NUAK1	-4.08901	17.9829	0.000690041	-0.237896	-0.0764004	3.61612	3.77327
CDKN2B	-4.0882	17.7377	0.000708725	-0.557177	-0.17864	2.15065	2.51856
RNF41	-4.08748	10.78	0.0018733	-0.20055	-0.0599361	3.33543	3.46567
PDXK	-4.08539	17.5294	0.000728615	-0.173409	-0.055477	3.17887	3.29331
LRCH1	-4.08296	13.0824	0.00127775	-0.382211	-0.11781	2.97393	3.22394
RPS6KA2	-4.07978	17.9867	0.000704087	-0.209449	-0.0670537	4.05282	4.19107
PTPDC1	-4.07977	15.2145	0.000959631	-0.220494	-0.069286	2.38172	2.52661
KIAA1147	-4.07974	16.0996	0.000862819	-0.183548	-0.0580647	3.71074	3.83154
AP001157.1	-4.07824	17.918	0.000711386	-0.251323	-0.0803859	1.96351	2.12936
FUOM	-4.07571	14.7701	0.00102373	-0.225646	-0.0705407	2.21164	2.35973
B4GALNT4	-4.07243	15.9733	0.000889126	-0.299513	-0.094422	2.9103	3.10727
NOTCH4	-4.07213	13.1203	0.00129668	-0.379938	-0.116703	3.44719	3.69551
RHOT2	-4.07146	15.0109	0.00100128	-0.1496	-0.0467929	3.34082	3.43901
MEX3B	-4.07042	10.3109	0.00211142	-0.254344	-0.0748681	3.00975	3.17436
NFIB	-4.06873	14.874	0.00102448	-0.149323	-0.0466071	3.98728	4.08525
TMCC2	-4.05947	12.0067	0.00158145	-0.187474	-0.0565231	2.30462	2.42662
MYO1B	-4.05926	15.0597	0.00102014	-0.441817	-0.137652	3.45671	3.74644
EFEMP2	-4.05417	14.6081	0.0010916	-0.181179	-0.0561255	3.39503	3.51368
CTNND1	-4.05079	10.4957	0.00210312	-0.11662	-0.0341933	4.25593	4.33134
RAC3	-4.04983	17.962	0.00075444	-0.208524	-0.0660581	2.95984	3.09713
NTN4	-4.04349	12.1685	0.00158515	-0.600729	-0.180444	3.93579	4.32637
YIPF3	-4.04077	11.2224	0.00186965	-0.133515	-0.0395014	3.66272	3.74923
ZNF526	-4.03897	13.9274	0.00123139	-0.159609	-0.0488555	2.80557	2.90981
AK3	-4.03148	15.3741	0.00103908	-0.211258	-0.0653333	3.33081	3.46911
ZNF865	-4.03034	14.2472	0.00119987	-0.153546	-0.0469979	3.01309	3.11336
SNRPB	-4.0281	17.6975	0.000812623	-0.226021	-0.070944	3.42208	3.57057
SLC9A5	-4.02688	17.3314	0.00084535	-0.171914	-0.0538177	2.19211	2.30498
LONRF3	-4.02673	15.695	0.00101039	-0.252161	-0.0780458	2.59007	2.75517
GEMIN8	-4.02622	13.0146	0.00143618	-0.179403	-0.0541166	2.61723	2.73399
EPB41	-4.02557	11.6932	0.00177004	-0.167487	-0.0496306	3.40263	3.51119
DCAF12L1	-4.02456	17.9743	0.000797102	-0.442302	-0.13888	2.21683	2.50742
AC083799.1	-4.02443	11.3769	0.00187191	-0.226094	-0.0666403	2.05518	2.20155
MOSPD3	-4.02328	17.2912	0.000855529	-0.18037	-0.0563779	2.88662	3.005
MLLT6	-4.02153	17.9125	0.000807315	-0.162891	-0.0510731	3.58496	3.69194
RIPK2	-4.02113	13.6922	0.00131666	-0.171438	-0.0520059	2.80617	2.91789
STX3	-4.01911	10.2516	0.00232323	-0.144919	-0.0417665	3.45446	3.5478
NRARP	-4.01897	12.1568	0.00166019	-0.471865	-0.140407	3.44113	3.74727
KLF16	-4.01534	10.9131	0.00206432	-0.155514	-0.0453207	3.37633	3.47675
PLAGL1	-4.01518	15.9047	0.00101044	-0.239208	-0.0738442	2.96993	3.12646
CACHD1	-4.01124	17.9827	0.000820429	-0.303957	-0.0949903	2.48503	2.6845
MAGEF1	-4.01097	13.3313	0.00141212	-0.127411	-0.0383531	2.72748	2.81036
RTN4	-4.00755	17.9982	0.000825965	-0.195135	-0.0609065	4.21415	4.34217
AC073130.2	-4.00647	17.9934	0.000828333	-0.531937	-0.165962	1.00864	1.35759
ELOA	-4.00588	15.4897	0.00108057	-0.174917	-0.0536402	3.41121	3.52549
PHACTR2	-4.00528	17.6124	0.000861803	-0.191204	-0.0594949	3.76809	3.89344
NSUN5	-4.00361	16.6361	0.000955676	-0.4141	-0.127966	1.37395	1.64499
KIAA1024	-3.99981	17.9938	0.000840678	-0.273315	-0.085068	1.98183	2.16102
MAFK	-3.99896	14.3477	0.00126029	-0.284792	-0.0862434	3.20634	3.39186
SFXN1	-3.99609	17.3475	0.000902768	-0.144902	-0.0448638	3.25789	3.35277
MUM1	-3.99386	15.3065	0.00113172	-0.184593	-0.0562719	3.11812	3.23855
STK11	-3.99361	12.0234	0.00177541	-0.0995624	-0.0292829	3.50246	3.56689
FAM118B	-3.99297	13.384	0.00145074	-0.142785	-0.0427141	3.07113	3.16388
LRRC20	-3.99032	16.6651	0.000980296	-0.192718	-0.0592763	2.49104	2.61703
CDK2AP1	-3.98973	14.3252	0.00128731	-0.170442	-0.0514249	3.73742	3.84835
DUSP10	-3.98718	15.8751	0.00107505	-0.332358	-0.101524	1.6045	1.82144
RLF	-3.98381	11.5931	0.00193775	-0.118973	-0.0346342	3.11639	3.19319
SAE1	-3.98351	14.1934	0.00132554	-0.143554	-0.0431551	3.67565	3.769
KHNYN	-3.97959	9.16683	0.00309238	-0.148858	-0.0411493	3.46485	3.55985
ADD3	-3.97943	15.8578	0.00109476	-0.239194	-0.0728449	3.45177	3.60779
ABHD14B	-3.97742	14.6505	0.0012665	-0.175252	-0.0527919	2.741	2.85503
NKIRAS2	-3.97186	9.2424	0.00307861	-0.145187	-0.0400859	3.46456	3.5572
EIF2AK1	-3.96721	13.6512	0.00146974	-0.141456	-0.0420233	3.6034	3.69514
AC010457.1	-3.96558	16.4445	0.00105785	-0.364415	-0.110887	1.0205	1.25815
PFDN1	-3.95922	15.673	0.00116575	-0.155012	-0.0467814	3.26693	3.36783
LAMC1	-3.95535	12.8181	0.00168825	-0.22659	-0.0663552	4.51945	4.66592
OXSR1	-3.955	12.8639	0.00167823	-0.1361	-0.0398733	3.43545	3.52344
NOXA1	-3.94814	16.5323	0.00108798	-0.434047	-0.131289	1.728	2.01067
RRBP1	-3.94454	17.7238	0.000974992	-0.169564	-0.051624	4.07344	4.18403
ALKBH7	-3.94347	11.5177	0.00210666	-0.16491	-0.0471808	2.71801	2.82405
AL365357.1	-3.94174	10.8408	0.00236997	-0.147932	-0.0417996	2.80733	2.90219
CACNA1H	-3.93804	16.2705	0.00114241	-0.305912	-0.0919994	1.14191	1.34087
PTPRN2	-3.9331	15.8507	0.00120727	-0.351717	-0.105235	1.79288	2.02136
SEC16A	-3.92939	17.2703	0.00105248	-0.152776	-0.046113	3.80382	3.90326
RERE	-3.92613	17.9988	0.00099017	-0.156733	-0.0474639	3.75685	3.85895
P3H4	-3.92379	17.8978	0.00100454	-0.181306	-0.0548232	3.47745	3.59552
SAMD4A	-3.92319	16.0538	0.00120614	-0.279456	-0.0834256	3.2576	3.43904
ETV6	-3.92261	13.4396	0.00164793	-0.145434	-0.0423534	3.32164	3.41554
AP002004.1	-3.92117	17.9434	0.00100623	-0.322049	-0.0973101	2.95441	3.16409
SLC35B2	-3.92038	10.0717	0.00282578	-0.149345	-0.0411705	3.27788	3.37314
COL21A1	-3.91796	16.7472	0.00113571	-0.945432	-0.283105	1.68252	2.29679
RCHY1	-3.91644	12.5094	0.00189814	-0.158458	-0.0455009	2.82676	2.92874
LRRC42	-3.91518	11.2865	0.0022996	-0.105454	-0.029706	3.03443	3.10201
YIPF5	-3.91508	17.2643	0.00108652	-0.178055	-0.0534459	3.41802	3.53377
OSTC	-3.91431	14.6683	0.00143499	-0.133788	-0.0393329	3.50495	3.59151
TUBA1A	-3.91413	17.4185	0.00107297	-0.326615	-0.0981006	3.87603	4.08838
TNFRSF10D	-3.91255	15.845	0.00126119	-0.333317	-0.0989298	3.9652	4.18132
PPM1K	-3.91066	9.97485	0.00292414	-0.255496	-0.0699858	2.47825	2.64099
MOGS	-3.90931	16.4223	0.0011955	-0.148004	-0.0440667	3.5755	3.67154
EMC8	-3.90756	11.6225	0.0022073	-0.163154	-0.0460708	3.07535	3.17996
NHS	-3.90206	17.8708	0.00105683	-0.540398	-0.162014	1.83057	2.18177
KRT7	-3.90109	17.0699	0.00114124	-0.457698	-0.136461	3.41749	3.71457
MAP2K1	-3.90014	17.9071	0.00105787	-0.170013	-0.0509439	3.4128	3.52327
ARF4	-3.89966	17.8656	0.00106297	-0.191932	-0.0574866	3.89706	4.02177
MEF2D	-3.89965	8.297	0.0042364	-0.138219	-0.0358962	3.53569	3.62275
VGLL3	-3.89896	13.109	0.00180272	-0.56606	-0.162638	1.94625	2.3106
TRIM16	-3.89879	11.8311	0.00217013	-0.348975	-0.0985061	2.33235	2.55609
TMEM106A	-3.89581	17.3132	0.00112804	-0.172351	-0.0513632	2.28107	2.39292
NPLOC4	-3.89503	15.9651	0.0012919	-0.145595	-0.0429561	3.73583	3.83011
PHC2	-3.89174	15.4246	0.00137844	-0.159515	-0.0467931	3.63927	3.74243
CCNY	-3.89022	14.0112	0.00163062	-0.159439	-0.0461181	3.77887	3.88165
CD274	-3.888	17.0876	0.0011722	-0.267019	-0.0792114	2.20158	2.37469
BACE2	-3.8871	11.1709	0.00246132	-0.416382	-0.115677	3.8303	4.09633
ABCA5	-3.88568	14.7584	0.00150442	-0.254083	-0.0739095	2.587	2.751
FAAP100	-3.88484	13.4626	0.00176695	-0.142673	-0.0409277	3.28582	3.37762
USP46	-3.8848	11.6904	0.0022742	-0.163905	-0.0458925	3.02118	3.12608
GPR107	-3.88387	11.8718	0.00221523	-0.163856	-0.0459921	3.67997	3.7849
FAM109B	-3.88326	17.0558	0.00118796	-0.179285	-0.0530735	2.90353	3.01971
L3MBTL3	-3.88108	13.9952	0.00166355	-0.189377	-0.0545641	3.36761	3.48958
APBA1	-3.87984	14.1748	0.00163128	-0.315994	-0.0911719	2.17899	2.38258
ETAA1	-3.87793	10.1478	0.00298635	-0.121428	-0.0329196	2.72986	2.80704
WDR90	-3.87697	17.7953	0.00112494	-0.150928	-0.0447845	2.77077	2.86863
POLR3D	-3.87583	17.4934	0.00115904	-0.147476	-0.043656	3.13055	3.22611
MOAP1	-3.87464	14.5577	0.00157466	-0.231847	-0.0670094	2.86551	3.01494
ZNF696	-3.86847	12.8322	0.00198324	-0.266347	-0.0752992	2.29505	2.46587
CORO7	-3.86732	17.9316	0.00113549	-0.199752	-0.0590948	2.60184	2.73126
ZBTB34	-3.86693	12.139	0.00219469	-0.198462	-0.0555315	3.02492	3.15191
RPS7	-3.86489	14.7698	0.00156705	-0.179514	-0.0517827	2.95465	3.07029
PDIA5	-3.86442	15.8218	0.00139849	-0.249674	-0.0726789	3.42843	3.5896
PLA2G4C	-3.86333	16.069	0.00136644	-0.307808	-0.0897394	2.76833	2.9671
DDB1	-3.85687	12.9445	0.00199638	-0.110693	-0.0311866	4.06953	4.14047
PLPP6	-3.85639	10.2011	0.0030643	-0.122788	-0.0330107	2.49564	2.57353
ROMO1	-3.85317	17.9988	0.00116497	-0.200056	-0.0588749	2.89263	3.0221
MED14	-3.85259	16.846	0.00129518	-0.173005	-0.0505132	3.57172	3.68348
FSCN1	-3.85145	16.0754	0.00140026	-0.213107	-0.0618327	4.40565	4.54312
BMP6	-3.85134	17.9179	0.001178	-0.301584	-0.0886432	3.86929	4.06441
TRIM24	-3.84808	15.759	0.00145667	-0.225535	-0.0651806	3.24181	3.38717
PGAM1	-3.84322	17.2802	0.00126948	-0.229047	-0.0668231	2.81864	2.96658
SOX4	-3.83958	17.5218	0.00125206	-0.140232	-0.0409173	4.19522	4.28579
TNFRSF12A	-3.83787	16.602	0.00136843	-0.451803	-0.13089	2.83196	3.12331
FRMD5	-3.83758	17.6687	0.00124132	-0.259298	-0.0756695	2.69746	2.86495
ABL2	-3.83022	17.5063	0.00127988	-0.195278	-0.056755	3.95673	4.08275
RNF187	-3.82965	11.1921	0.00271108	-0.120031	-0.0325327	3.67917	3.75546
AAR2	-3.82881	13.0869	0.00206615	-0.169365	-0.0472336	2.94524	3.05354
CKAP4	-3.82782	16.8258	0.00136899	-0.195138	-0.0563909	4.14902	4.27478
AES	-3.8272	15.2885	0.0015984	-0.163073	-0.0465314	4.03532	4.14013
GAREM2	-3.82421	16.4635	0.00142798	-0.252178	-0.072569	2.51957	2.68194
PRRC2B	-3.82361	15.3997	0.00159143	-0.136026	-0.0387936	4.13294	4.22035
AXIN2	-3.81944	17.9995	0.00125585	-0.447751	-0.129969	1.73753	2.02639
GORASP2	-3.81794	11.9178	0.00247813	-0.116505	-0.0318038	3.671	3.74515
NUDCD3	-3.81791	11.5512	0.00261745	-0.141046	-0.0382705	3.47947	3.56912
NLGN2	-3.81691	17.9918	0.00126378	-0.160636	-0.046577	3.36506	3.46866
MYL12B	-3.81075	17.8611	0.00129553	-0.198304	-0.0573047	3.88219	4.01
GIMAP8	-3.80966	17.4011	0.00135156	-0.228526	-0.0658079	3.81852	3.96568
VWF	-3.80819	17.9266	0.00129567	-0.228901	-0.0661038	5.21111	5.35861
ACE	-3.80228	15.6313	0.00162414	-0.608895	-0.172438	3.48456	3.87523
ZSWIM6	-3.80123	14.1153	0.00191993	-0.199409	-0.055622	3.23853	3.36604
ARHGAP12	-3.79696	8.17183	0.0050571	-0.170007	-0.0418247	2.99947	3.10538
TSPO	-3.79539	15.1023	0.00174062	-0.142531	-0.0400539	3.75592	3.84721
NIPA1	-3.79423	10.02	0.00350636	-0.173479	-0.0451345	3.03485	3.14415
PABPC4L	-3.78901	16.3388	0.00155785	-0.340574	-0.0964666	2.02656	2.24508
TMEM129	-3.78833	17.6271	0.00138895	-0.153586	-0.0438989	3.19542	3.29416
NAA50	-3.78742	17.9289	0.00135669	-0.170316	-0.0487584	3.59324	3.70277
RRAGA	-3.78724	9.63355	0.00380481	-0.110949	-0.0284889	3.5386	3.60832
TMEM263	-3.7869	14.5823	0.00187368	-0.158024	-0.0440198	3.51423	3.61525
CRLS1	-3.78623	15.7851	0.00165377	-0.133166	-0.0375029	3.07325	3.15858
CLMN	-3.78566	17.6154	0.00139858	-0.474636	-0.135499	2.04905	2.35412
FAM160B2	-3.78273	14.7292	0.00185928	-0.128769	-0.0358582	3.2235	3.30581
DPYSL4	-3.78037	16.439	0.00157192	-0.32113	-0.0906935	3.17247	3.37839
SELENOP	-3.77503	15.6111	0.00172264	-0.651615	-0.182346	1.32033	1.73731
EIF4E3	-3.77307	17.6519	0.00143353	-0.253054	-0.0718723	2.68611	2.84857
MRPL14	-3.77127	15.5298	0.00175044	-0.167039	-0.0466334	2.91984	3.02668
SLC2A1	-3.77083	17.895	0.00141164	-0.42667	-0.121261	3.41873	3.69269
MAP4K3	-3.76562	12.1009	0.00265547	-0.157754	-0.0421786	3.01951	3.11948
RALY	-3.76367	12.7261	0.00244994	-0.14251	-0.0384246	3.68516	3.77563
LIMD2	-3.7615	15.5012	0.00179152	-0.208393	-0.057914	3.20739	3.34054
SRP54	-3.76102	14.2171	0.00205558	-0.159277	-0.0436946	3.295	3.39648
MPG	-3.7567	10.2528	0.00358283	-0.171331	-0.0440261	3.31321	3.42089
PNPLA2	-3.75491	17.2776	0.00154032	-0.201923	-0.0567544	3.6126	3.74194
POM121C	-3.74847	13.1336	0.0023943	-0.129386	-0.0348366	2.92338	3.00549
TCF3	-3.74711	14.8933	0.00196416	-0.129378	-0.0355208	3.9329	4.01535
GAS2L3	-3.74701	17.8244	0.00149699	-0.278249	-0.0782317	2.74074	2.91898
SLC39A7	-3.74656	17.5258	0.00153607	-0.177729	-0.0498589	3.74724	3.86103
SMPDL3A	-3.73826	17.4137	0.00157916	-0.19743	-0.0551407	2.33493	2.46121
ATOH8	-3.73601	17.1547	0.00162229	-0.585655	-0.163103	2.18529	2.55967
CBLB	-3.7358	13.7262	0.00228534	-0.199059	-0.0536833	2.99881	3.12518
LIMD1	-3.73525	11.4925	0.00305906	-0.164776	-0.0429885	3.35278	3.45667
ZNF516	-3.73179	14.6383	0.0020816	-0.176361	-0.0479609	3.03027	3.14243
ACER2	-3.73065	17.2285	0.00163104	-0.297837	-0.0827941	2.51391	2.70423
TTC13	-3.73032	13.6158	0.00233983	-0.15489	-0.0416103	3.05855	3.1568
MAP3K3	-3.72846	10.5101	0.00359998	-0.136776	-0.0348705	3.7725	3.85833
TMEM98	-3.72525	11.0235	0.00333901	-0.145902	-0.0375446	3.39227	3.484
ATF6	-3.72457	17.2461	0.00165042	-0.123893	-0.0343512	3.86532	3.94444
KLHL25	-3.72147	12.6598	0.00267497	-0.144888	-0.0382706	2.46856	2.56014
THSD7A	-3.71985	16.7051	0.00174712	-0.256015	-0.070547	3.41128	3.57456
CD163L1	-3.71741	17.9987	0.00157651	-0.350474	-0.09737	2.2801	2.50402
PLEKHA5	-3.71263	17.6726	0.00163549	-0.175733	-0.0486113	2.88899	3.00116
MCTP1	-3.71117	15.8569	0.00192266	-0.368567	-0.100455	3.59438	3.82889
IQGAP2	-3.70979	16.5569	0.00180888	-0.410705	-0.112527	1.97185	2.23347
CCAR2	-3.70658	15.5623	0.00199647	-0.153171	-0.0415494	3.58078	3.67814
RASSF4	-3.70625	14.6902	0.00218012	-0.552786	-0.148651	2.48103	2.83175
ELP2	-3.70586	9.85955	0.00416817	-0.115238	-0.0285928	3.33925	3.41116
SLC11A2	-3.70582	14.7878	0.00216007	-0.176875	-0.0476025	3.01121	3.12345
PANX2	-3.70503	14.7151	0.0021799	-0.312574	-0.0840288	2.24122	2.43952
TACSTD2	-3.70488	17.998	0.00162121	-0.406917	-0.112417	3.32561	3.58528
SLC12A4	-3.70468	17.1046	0.00174431	-0.169038	-0.046402	3.39439	3.50211
ZDHHC4	-3.69982	14.3871	0.00228026	-0.166661	-0.0445377	2.80794	2.91354
IPMK	-3.69637	9.79208	0.00428299	-0.228372	-0.0562869	2.67049	2.81282
TMEM204	-3.69636	17.8902	0.00166629	-0.24653	-0.0677959	3.03448	3.19164
RAB3B	-3.69464	17.6773	0.00170116	-0.416617	-0.114313	3.15842	3.42389
SLC25A6	-3.6908	11.461	0.00332633	-0.132715	-0.0338627	4.36332	4.4466
DDAH1	-3.6901	15.6007	0.00205871	-0.217222	-0.0584961	3.49572	3.63358
PPP1R26	-3.68634	17.0553	0.00182289	-0.202026	-0.0549729	3.14608	3.27458
ESRRA	-3.68553	11.2291	0.00347167	-0.138015	-0.0349672	3.0669	3.15339
EHD3	-3.68294	11.297	0.00345337	-0.311038	-0.0788061	2.9517	3.14662
DEXI	-3.68229	9.54347	0.00457697	-0.118528	-0.0287993	2.90919	2.98286
NACC1	-3.67069	16.9916	0.00189597	-0.140681	-0.0379848	3.73969	3.82903
KDM5B	-3.67018	16.5027	0.00197855	-0.120337	-0.032358	3.76864	3.84499
SLC45A4	-3.66623	17.9924	0.00176765	-0.260658	-0.0707437	2.33857	2.50427
ZNF771	-3.66615	13.1957	0.00278301	-0.201814	-0.0522979	2.5881	2.71516
TM4SF18	-3.66147	17.0875	0.00191908	-0.345641	-0.0929908	3.36913	3.58845
EDN1	-3.65928	17.9887	0.00179574	-0.63552	-0.171919	3.55775	3.96147
RANBP17	-3.65855	16.647	0.0020036	-0.304653	-0.0815672	1.96568	2.15879
SNX9	-3.65704	10.7213	0.00393446	-0.137904	-0.0340714	3.64549	3.73148
ARFIP2	-3.65577	15.6522	0.00220115	-0.122483	-0.0324677	3.15382	3.2313
MGAT4B	-3.65337	11.2687	0.00365366	-0.120969	-0.0301758	4.09114	4.16671
PIEZO2	-3.65322	17.7478	0.00185401	-0.710463	-0.191326	2.49998	2.95088
AC007998.3	-3.65275	17.9941	0.00182126	-0.385708	-0.104026	2.55606	2.80093
PAQR4	-3.65194	17.9942	0.00182453	-0.276687	-0.0745943	2.78476	2.9604
HNRNPA0	-3.6502	12.7408	0.00302873	-0.130494	-0.0333326	3.93073	4.01264
FIBP	-3.64796	11.1738	0.00373913	-0.135493	-0.0336403	3.28778	3.37235
KIAA1958	-3.64733	17.9971	0.00184297	-0.194458	-0.0523124	2.32008	2.44346
DOCK4	-3.64591	16.4363	0.002096	-0.154253	-0.0409799	4.04763	4.14525
N4BP1	-3.6429	9.18488	0.00519696	-0.12888	-0.0303218	3.23044	3.31005
GSKIP	-3.6422	12.4734	0.00317723	-0.154516	-0.0391487	2.85037	2.94721
TMEM159	-3.64104	13.5786	0.00279707	-0.163653	-0.0420991	2.92457	3.02744
SEMA4G	-3.63887	16.914	0.0020445	-0.25397	-0.067506	2.48937	2.65011
XBP1	-3.63839	17.1553	0.00200694	-0.198551	-0.0528627	3.42496	3.55067
FBXL17	-3.63657	15.1608	0.00239871	-0.153812	-0.0402021	2.83905	2.93606
AL158206.1	-3.63554	17.7839	0.00192265	-0.320216	-0.0855347	2.52662	2.72949
GALNT15	-3.6352	12.6047	0.00316763	-1.17443	-0.29711	2.40129	3.13706
MAFF	-3.6351	18	0.00189339	-0.278304	-0.0744362	3.38126	3.55763
IL3RA	-3.63315	17.9995	0.00190168	-0.251087	-0.0670939	2.69119	2.85028
TRIM62	-3.6331	10.6735	0.00412959	-0.202692	-0.0493994	2.62717	2.75321
RPL39	-3.6325	13.4628	0.00288089	-0.156714	-0.0400811	2.69988	2.79827
YRDC	-3.6305	15.3475	0.00238655	-0.234488	-0.0612207	2.74349	2.89134
YKT6	-3.62859	17.1219	0.00205576	-0.147606	-0.0391039	3.65367	3.74702
SPRY2	-3.62623	17.9671	0.0019359	-0.261652	-0.0696695	2.66855	2.83421
MARK1	-3.62375	13.8109	0.00282122	-0.135214	-0.0345855	2.31827	2.40317
ZYX	-3.62231	17.144	0.00208036	-0.184423	-0.0487174	4.1174	4.23397
RASA2	-3.6223	14.3782	0.00266684	-0.157263	-0.0404714	2.75674	2.85561
ZNF629	-3.62133	16.1624	0.00226133	-0.140355	-0.0367585	3.15551	3.24406
CD34	-3.61983	15.4212	0.00242338	-0.48928	-0.127164	3.56377	3.872
TIFA	-3.6159	16.0977	0.00230037	-0.167441	-0.0437099	2.69835	2.80393
EMILIN2	-3.61521	16.2228	0.00227911	-0.382611	-0.099956	1.85805	2.09933
SELE	-3.61384	17.9823	0.00198773	-0.770719	-0.204014	1.65965	2.14702
C16orf58	-3.61292	15.3655	0.00247102	-0.132391	-0.0342714	3.24945	3.33278
LZTS3	-3.61256	17.5612	0.00205736	-0.336414	-0.0887259	2.31875	2.53132
FOXJ3	-3.61134	9.7921	0.00492151	-0.161253	-0.0379768	3.37843	3.47804
KLHDC3	-3.61087	11.2853	0.00393043	-0.131454	-0.0320797	3.48072	3.56249
KCTD11	-3.61029	16.9528	0.00216829	-0.165885	-0.0434978	2.50251	2.6072
INPPL1	-3.61017	14.5445	0.00268762	-0.1086	-0.0278309	3.80428	3.87249
FAM234B	-3.60884	13.6924	0.0029423	-0.154708	-0.0392139	2.68857	2.78553
IL1RAP	-3.60825	14.8979	0.00260685	-0.177705	-0.0456731	2.29695	2.40864
NECTIN3	-3.60672	15.0013	0.00258939	-0.219687	-0.0564819	3.07624	3.21433
PGK1	-3.60468	17.9712	0.00203028	-0.184794	-0.0486941	3.99512	4.11186
TSPAN15	-3.59971	17.8916	0.00206485	-0.617391	-0.162197	3.15367	3.54347
ASB13	-3.59903	17.9096	0.00206524	-0.18514	-0.0486288	2.57283	2.68972
WDR45B	-3.59874	13.7665	0.00297766	-0.162228	-0.0409464	3.47311	3.57469
TPGS2	-3.59805	13.8707	0.00294914	-0.137066	-0.0346294	3.79689	3.88274
EEF2K	-3.59768	10.5384	0.00447805	-0.163969	-0.0390805	3.38274	3.48426
SELENOO	-3.5975	13.5066	0.00306921	-0.0997091	-0.0250648	3.02163	3.08402
RNF216	-3.59403	12.1295	0.00362661	-0.104599	-0.0257007	3.4442	3.50935
DROSHA	-3.59362	13.6644	0.00304057	-0.175039	-0.0440047	3.37093	3.48045
MZT2B	-3.59283	10.0351	0.00487871	-0.145825	-0.0342204	3.3035	3.39353
AGAP1	-3.5916	12.8246	0.00335098	-0.182512	-0.0452945	3.13057	3.24448
ZNF469	-3.59147	17.8939	0.00210259	-0.327379	-0.0856591	3.00523	3.21175
TPBG	-3.59064	17.4688	0.00217414	-0.217115	-0.0566073	2.81974	2.9566
PTPRE	-3.59051	17.3433	0.00219566	-0.168138	-0.0437927	3.79282	3.89878
PTOV1	-3.59028	13.8104	0.00301371	-0.120999	-0.0304242	3.68251	3.75822
TRO	-3.58301	15.7888	0.0025325	-0.311052	-0.0796435	2.80594	3.00129
PMPCA	-3.58224	17.4226	0.00222234	-0.146135	-0.0379282	3.26245	3.35448
GOLGA2	-3.57976	16.0123	0.0025014	-0.157458	-0.0403343	3.43965	3.53854
KLHL20	-3.57964	15.7907	0.00255008	-0.187085	-0.0478208	3.12097	3.23843
CSNK2A2	-3.57593	8.80593	0.00618247	-0.126818	-0.028336	3.72127	3.79884
USP11	-3.57284	12.765	0.00349647	-0.139706	-0.0342959	3.15441	3.24141
MCAM	-3.57259	16.905	0.00236172	-0.198548	-0.0510708	4.71872	4.84353
GABPB1	-3.57019	12.1155	0.00379633	-0.150164	-0.0364175	3.2556	3.34889
CITED2	-3.56863	14.2644	0.00300408	-0.271454	-0.0678701	3.04479	3.21445
GNA11	-3.56294	14.6424	0.00292934	-0.130656	-0.0327148	3.8347	3.91638
TMEM8A	-3.56115	14.021	0.00312418	-0.147729	-0.0366801	3.80954	3.90174
SLC1A1	-3.56023	12.6532	0.00362743	-0.164954	-0.0401487	3.02839	3.13094
MERTK	-3.55848	14.3123	0.00305143	-0.219669	-0.0546609	3.15992	3.29708
CMPK2	-3.55713	15.4509	0.0027533	-0.786579	-0.198069	1.70611	2.19844
TRAF5	-3.55613	12.8613	0.00356987	-0.22102	-0.0538513	2.73151	2.86894
ZBTB37	-3.55565	14.9497	0.002889	-0.252394	-0.0631716	2.52331	2.68109
PRKG1	-3.55531	17.9855	0.00226339	-0.263374	-0.0677145	1.69459	1.86013
PLXNA2	-3.55401	17.3922	0.00236959	-0.23785	-0.0608392	4.18596	4.3353
BMX	-3.55141	12.8327	0.00361379	-0.218034	-0.0529638	3.64767	3.78317
LAMA2	-3.55107	15.4858	0.00277977	-0.533169	-0.133879	1.27897	1.6125
DPF1	-3.54969	17.9459	0.00229827	-0.327043	-0.083818	1.53042	1.73585
TMED9	-3.54817	17.3088	0.00241499	-0.156997	-0.0400109	3.89684	3.99534
BMP4	-3.54611	17.9958	0.0023085	-0.605677	-0.155	3.32483	3.70517
LYPLA1	-3.54417	12.1986	0.00394357	-0.159488	-0.0381854	3.33092	3.42975
CALD1	-3.54365	15.3344	0.00286062	-0.196478	-0.0490667	4.06079	4.18356
ACTB	-3.53854	17.7984	0.0023805	-0.202973	-0.051665	5.03358	5.1609
LYPLA2	-3.53723	15.7892	0.00278794	-0.14505	-0.0362667	3.42469	3.51535
RPL3	-3.53467	12.8785	0.0037118	-0.147264	-0.0354706	4.48477	4.57613
CDKN1C	-3.53428	17.3502	0.0024819	-0.409955	-0.10376	2.33292	2.58978
ULK3	-3.53328	12.8467	0.00373479	-0.152745	-0.0367442	2.99041	3.08516
YEATS2	-3.53289	11.1678	0.00458598	-0.164302	-0.0383077	3.55409	3.6554
MXI1	-3.53272	16.6213	0.00263141	-0.261898	-0.0658311	2.83428	2.99815
TIMP3	-3.5288	14.8931	0.003068	-0.432095	-0.106545	3.19723	3.46655
SELENOS	-3.52609	17.2022	0.00255438	-0.160047	-0.0402861	3.02095	3.12112
FAM20C	-3.52505	13.7936	0.0034333	-0.132046	-0.032058	3.28669	3.36875
ZNF71	-3.52391	12.3057	0.00404336	-0.159072	-0.0377268	2.78401	2.88241
PBLD	-3.52308	17.96	0.00243571	-0.281635	-0.0711967	1.97142	2.14783
GPR137B	-3.51995	16.6659	0.00269529	-0.171228	-0.0427664	2.76126	2.86826
SLC25A10	-3.51946	17.8831	0.00246847	-0.2589	-0.0652874	1.87764	2.03973
UBE2V1P2	-3.51658	17.9689	0.00246955	-0.553642	-0.139491	0.46007	0.806637
YIPF2	-3.51639	17.9637	0.00247151	-0.146505	-0.0369067	3.16937	3.26107
TRIM27	-3.51543	13.9714	0.00343807	-0.129915	-0.0314477	3.39514	3.47582
HHEX	-3.51059	11.7403	0.0044352	-0.125969	-0.0293405	3.46566	3.54332
TSC22D2	-3.50985	16.3608	0.00282027	-0.178711	-0.0442727	3.15311	3.2646
GPKOW	-3.50978	10.8262	0.00500195	-0.13435	-0.0306655	2.82009	2.9026
SMARCA1	-3.50853	17.9656	0.00251467	-0.144758	-0.0363156	3.46474	3.55528
SCAF1	-3.50814	17.062	0.00268372	-0.136045	-0.0338797	3.66786	3.75283
MRPS21	-3.50809	11.0286	0.00488134	-0.136364	-0.0312413	3.04466	3.12846
DCBLD1	-3.50675	17.9619	0.00252525	-0.280006	-0.0701769	3.26668	3.44177
GBE1	-3.50656	17.9637	0.00252602	-0.182374	-0.0457036	3.42546	3.5395
NUBP2	-3.50589	12.1933	0.00423658	-0.114088	-0.0267282	3.15147	3.22188
MYDGF	-3.50399	17.0839	0.00270364	-0.155268	-0.0385877	3.52985	3.62678
FKBP14	-3.50274	17.9629	0.00254765	-0.168638	-0.0421749	3.2118	3.3172
SMYD3	-3.49884	10.5475	0.00529861	-0.117667	-0.0265	2.64711	2.71919
SGCE	-3.49818	12.7728	0.00402544	-0.229772	-0.0541272	3.05542	3.19737
MFHAS1	-3.49614	13.8729	0.00360667	-0.134667	-0.0322065	3.24877	3.3322
RICTOR	-3.49491	10.9679	0.00503651	-0.253792	-0.0576104	3.46887	3.62457
TSNAX	-3.48959	8.70721	0.00719098	-0.170026	-0.035867	2.80901	2.91196
MMP11	-3.48814	17.9455	0.00263457	-0.34893	-0.0865698	2.7915	3.00925
SGIP1	-3.48553	15.589	0.00315895	-0.341595	-0.0828766	2.77721	2.98944
TNPO1	-3.48525	15.359	0.00322198	-0.157141	-0.0380264	4.06089	4.15847
B3GALT6	-3.48481	13.3855	0.00387154	-0.169486	-0.0399979	3.28527	3.39001
MAPKAPK5	-3.48323	14.9321	0.00335623	-0.146275	-0.0351895	2.8876	2.97833
MTSS1	-3.48007	13.9901	0.00368151	-0.186557	-0.044281	3.59779	3.71321
CCNJ	-3.47904	13.9604	0.00369955	-0.205798	-0.0487999	3.17189	3.29919
SNHG16	-3.47748	16.6014	0.00296724	-0.150236	-0.0366457	3.18318	3.27662
PAIP2	-3.47732	12.8676	0.00414593	-0.136362	-0.0317864	3.35403	3.43811
MED30	-3.47405	14.6514	0.0035055	-0.193733	-0.0462126	2.29488	2.41486
MAPK8	-3.47198	10.555	0.00554374	-0.158095	-0.0350329	3.12885	3.22541
KATNB1	-3.47088	11.2803	0.00504638	-0.117213	-0.0264117	2.94276	3.01457
TLE2	-3.46761	16.4755	0.00305947	-0.237243	-0.0574846	3.34768	3.49505
HAGLROS	-3.4673	16.4829	0.00305981	-0.319607	-0.0774333	1.96304	2.16156
TNFSF18	-3.46536	15.344	0.00336184	-0.531646	-0.127199	2.05085	2.38027
NECAP2	-3.45922	11.5529	0.00498169	-0.129937	-0.0292437	3.64164	3.72123
TMEM184A	-3.45848	16.8683	0.00303098	-0.653897	-0.158194	0.569236	0.975281
TXNL4A	-3.4581	15.6518	0.00332823	-0.137157	-0.0327877	3.33724	3.42221
STUB1	-3.45801	15.9697	0.00324604	-0.139158	-0.0333729	3.4073	3.49356
KDM2B	-3.45478	12.4053	0.00454958	-0.110867	-0.0253007	3.12514	3.19322
BCHE	-3.45447	17.1503	0.00299656	-0.385752	-0.0933414	2.3595	2.59905
EEF1B2	-3.45446	11.8708	0.00483776	-0.135199	-0.0305381	3.21756	3.30043
CASTOR2	-3.45425	15.4692	0.00340505	-0.175903	-0.0418761	2.15177	2.26066
VPS37C	-3.45357	12.1257	0.00470513	-0.150627	-0.0341731	2.90785	3.00025
DERA	-3.453	15.2583	0.00347367	-0.173373	-0.041149	2.90855	3.01581
AC037198.2	-3.45106	17.8564	0.00287705	-0.39029	-0.0948056	2.11037	2.35291
ALDH1A3	-3.45084	15.8858	0.0033171	-0.366741	-0.0875189	2.05777	2.2849
CCNDBP1	-3.45052	14.8112	0.00362624	-0.234276	-0.0552386	2.96309	3.10784
AGL	-3.45	15.7671	0.00335416	-0.17436	-0.0415384	2.91631	3.02426
MYADM	-3.44882	17.4413	0.00297315	-0.256497	-0.0620195	3.75403	3.91329
SEC31A	-3.44832	17.1317	0.0030409	-0.12799	-0.0308575	4.12326	4.20269
PRKD1	-3.44819	11.5635	0.00507556	-0.190277	-0.0425453	2.48907	2.60548
NID2	-3.44787	17.8483	0.00289897	-0.806503	-0.195544	2.77095	3.27197
MAP3K7CL	-3.44674	13.1683	0.00426112	-0.285606	-0.0656988	1.80879	1.98444
NUDT4	-3.44503	15.7909	0.003383	-0.300152	-0.0713199	3.4004	3.58614
FAM173A	-3.44415	15.5905	0.00344357	-0.172216	-0.0408137	2.51417	2.62068
RFTN1	-3.44406	13.4486	0.00416512	-0.239308	-0.0551969	3.24528	3.39254
RFLNB	-3.44361	14.1557	0.00389814	-0.193431	-0.0450505	3.3274	3.44664
NISCH	-3.44139	16.2868	0.00328166	-0.161389	-0.0384585	3.69954	3.79946
REXO5	-3.43811	11.4714	0.00522682	-0.254259	-0.0563856	1.90419	2.05951
RETREG3	-3.43711	12.3791	0.00471638	-0.110514	-0.0249397	3.25608	3.32381
PPP2R3B	-3.43536	17.6134	0.00302685	-0.115343	-0.0277161	2.83471	2.90624
SURF4	-3.43529	17.544	0.00304142	-0.14387	-0.0345498	4.10143	4.19064
RIN2	-3.4347	16.1411	0.00336536	-0.188283	-0.0446302	3.63476	3.75121
PTPN21	-3.43228	16.9655	0.0031855	-0.172536	-0.0411581	2.97291	3.07976
NAA30	-3.43028	10.4912	0.00600875	-0.151243	-0.0325888	3.18042	3.27234
ARCN1	-3.42946	13.2321	0.00437785	-0.133149	-0.0303421	3.9656	4.04734
PARP16	-3.42228	14.1837	0.00405767	-0.16957	-0.0390093	2.38247	2.48676
SF3A2	-3.42008	9.53099	0.00701526	-0.137196	-0.0285137	3.6708	3.75365
FLOT2	-3.42004	11.1563	0.00561175	-0.176142	-0.038344	3.73773	3.84497
SLC39A9	-3.41967	9.97325	0.00657615	-0.117685	-0.0248079	3.44534	3.51658
RGCC	-3.41766	17.9693	0.0030751	-0.595745	-0.142111	2.82231	3.19124
EGFL7	-3.41387	10.0593	0.00655967	-0.15615	-0.0328763	4.10562	4.20014
ECHS1	-3.41291	17.8088	0.00313975	-0.160635	-0.0381638	3.46919	3.56859
CDYL2	-3.40732	12.6453	0.00484887	-0.148737	-0.0331099	3.58424	3.67517
PHRF1	-3.40607	14.6577	0.00402222	-0.135051	-0.0309557	3.44777	3.53078
MBD4	-3.40517	12.1705	0.00512198	-0.13448	-0.029634	2.93809	3.02015
SLC46A1	-3.40497	13.8272	0.00433837	-0.264209	-0.059847	2.14702	2.30905
ZBED4	-3.40277	14.0005	0.00428897	-0.123841	-0.0280829	3.33136	3.40732
LMAN1	-3.4023	17.9659	0.00318212	-0.147384	-0.0348433	3.85748	3.9486
KCTD5	-3.40153	12.0224	0.00524182	-0.166761	-0.0365555	3.04681	3.14847
MLF1	-3.40132	14.4165	0.00414601	-0.315964	-0.0719908	2.28457	2.47855
BTD	-3.39903	17.9992	0.00319852	-0.127549	-0.0301042	2.93857	3.01739
AACS	-3.39704	14.0447	0.004321	-0.128251	-0.0289982	2.99075	3.06938
AKR1A1	-3.39552	17.8985	0.00324396	-0.171909	-0.0404573	3.31483	3.42102
SNAI1	-3.39364	9.43972	0.00742646	-0.676716	-0.137681	2.64732	3.05452
FGF16	-3.39095	17.4053	0.00338243	-0.349293	-0.0816436	2.54265	2.75811
JUNB	-3.38991	8.20481	0.00915369	-0.446432	-0.0858868	3.34249	3.60865
WASHC4	-3.38891	11.5846	0.00563753	-0.13598	-0.029296	3.69607	3.77871
COG5	-3.38889	14.1607	0.00434683	-0.105041	-0.0236688	3.26531	3.32967
TSTA3	-3.38589	14.529	0.00423618	-0.132398	-0.029925	3.33368	3.41484
CAMTA1	-3.3856	12.5387	0.00510872	-0.163909	-0.0359193	2.95397	3.05388
LDLRAD2	-3.38552	16.1242	0.00373941	-0.244368	-0.0562491	2.71342	2.86372
FAM107B	-3.38408	17.8299	0.00334138	-0.227756	-0.0532075	3.81804	3.95852
WDR1	-3.38345	13.998	0.00445806	-0.137067	-0.0307106	4.34313	4.42702
MORF4L2	-3.38207	17.3474	0.00346174	-0.138891	-0.0322758	3.93802	4.0236
PIBF1	-3.3806	12.7832	0.00502991	-0.116943	-0.0256574	2.84906	2.92036
RNF4	-3.38031	12.3143	0.00528284	-0.144998	-0.0315338	3.36893	3.4572
BNIP2	-3.37787	9.89226	0.00713469	-0.121093	-0.0247491	3.63514	3.70807
PRMT1	-3.37693	17.7783	0.00340546	-0.153519	-0.0356958	3.62503	3.71964
SLC35E1	-3.37522	17.806	0.00341238	-0.149674	-0.0347738	3.46743	3.55966
MGAT5B	-3.37522	13.4067	0.00478295	-0.448438	-0.0990723	1.82425	2.09801
PDE6B	-3.37443	17.6178	0.00345917	-0.271501	-0.0629485	1.4394	1.60663
PCNX3	-3.37113	14.5327	0.00436323	-0.093554	-0.0209523	3.58582	3.64308
OSTF1	-3.37026	14.6625	0.00432397	-0.157929	-0.03541	3.20015	3.29682
CYR61	-3.36993	15.4944	0.00404998	-0.416622	-0.0943394	3.97407	4.22955
FBRS	-3.36891	11.268	0.00606551	-0.120746	-0.0254858	3.65661	3.72972
AK4	-3.36827	17.2717	0.00358507	-0.572353	-0.131809	2.84693	3.19902
WDR25	-3.3639	16.1814	0.00389856	-0.188063	-0.0427429	2.44854	2.56395
JAK1	-3.36145	16.5455	0.00381993	-0.143089	-0.0325917	4.00505	4.09289
CNN2	-3.35924	17.5869	0.00358341	-0.179026	-0.0411143	3.90607	4.01614
CTDSP2	-3.35811	12.1766	0.00558742	-0.143569	-0.0306887	3.91703	4.00416
WIPF1	-3.35676	16.5222	0.00386465	-0.204603	-0.0464566	3.19855	3.32408
SMAD1	-3.3566	17.8178	0.0035527	-0.189682	-0.0435766	3.51235	3.62898
SCAND1	-3.35461	10.8378	0.00655364	-0.159226	-0.0329242	3.1376	3.23367
ANKRD6	-3.35419	12.4413	0.00547526	-0.182902	-0.0391968	2.73897	2.85002
AC114491.1	-3.35395	12.6464	0.00536482	-0.458702	-0.0986646	0.530293	0.808976
WNT3	-3.353	10.8367	0.00657316	-0.254794	-0.0526252	1.96452	2.11823
ECE1	-3.35104	16.3362	0.00396283	-0.150311	-0.0339439	4.77626	4.86839
PREX2	-3.34988	13.5118	0.004977	-0.322429	-0.0701944	3.66033	3.85664
ALDH1A1	-3.34895	14.81	0.00446172	-0.366465	-0.0812173	3.82412	4.04796
ABCA1	-3.3485	11.4897	0.00613268	-0.364436	-0.076262	2.96072	3.18107
DOCK9	-3.34221	17.3185	0.00378291	-0.182227	-0.0413124	4.04595	4.15772
VPS9D1	-3.342	15.7983	0.00419708	-0.130959	-0.0292373	2.97696	3.05705
C1orf122	-3.34012	16.4434	0.00402615	-0.16414	-0.0368529	2.95585	3.05635
AFF4	-3.33833	11.8366	0.00601108	-0.124725	-0.0261216	3.83208	3.9075
SLC44A5	-3.33627	17.3546	0.00382348	-0.273235	-0.0617338	2.45032	2.61781
LARP1B	-3.33529	11.0933	0.00657535	-0.15349	-0.0315233	2.6409	2.73341
ATXN7L3	-3.33323	11.9699	0.00598155	-0.122821	-0.0257066	3.63808	3.71234
PJA1	-3.32895	13.4569	0.00521093	-0.151759	-0.0325565	2.86322	2.95537
CD83	-3.32836	17.511	0.00385216	-0.546148	-0.122953	1.10788	1.44243
RGS19	-3.32694	15.359	0.00447366	-0.121386	-0.0267033	3.00724	3.08129
MKL2	-3.32648	15.2702	0.00450794	-0.155536	-0.034169	3.29579	3.39064
QPCTL	-3.32538	15.058	0.00459191	-0.111549	-0.0244242	2.69578	2.76377
RPLP0P6	-3.3248	13.7684	0.00511017	-0.175583	-0.0377482	1.90479	2.01145
UXS1	-3.32337	17.5525	0.00388449	-0.183993	-0.0413059	3.28762	3.40027
MSANTD3	-3.31909	17.0618	0.00404323	-0.137508	-0.0306476	3.22371	3.30779
MCRIP1	-3.31879	13.0561	0.00551447	-0.151595	-0.0320823	3.42634	3.51818
TP53	-3.31819	12.4864	0.00583308	-0.145196	-0.0303946	3.6519	3.7397
CAP1P2	-3.31798	17.9424	0.0038394	-0.236403	-0.053069	1.46556	1.61029
ARHGDIB	-3.31787	17.8114	0.00387035	-0.257001	-0.0576246	3.8897	4.04701
FBXO41	-3.31594	13.9449	0.00512192	-0.314818	-0.0674629	2.24248	2.43362
ENO1	-3.31502	17.347	0.00400646	-0.188642	-0.042046	4.52616	4.64151
BCL2	-3.31396	12.1671	0.00607267	-0.211341	-0.04383	2.20772	2.33531
PATJ	-3.31325	16.0279	0.00438633	-0.209228	-0.0459692	2.0575	2.1851
DIP2C	-3.31249	15.7685	0.00447444	-0.15071	-0.0329999	3.04485	3.1367
MTF2	-3.31237	9.00762	0.00903915	-0.151275	-0.0285088	2.99029	3.08019
C9orf64	-3.31195	16.7465	0.0041904	-0.358816	-0.0793611	1.92322	2.14231
PHLDA1	-3.31162	15.1822	0.0046793	-0.270426	-0.0587686	3.48555	3.65015
LEMD2	-3.31113	12.0795	0.00616014	-0.123718	-0.0255604	3.35504	3.42968
HLTF	-3.31113	16.4015	0.00429481	-0.147959	-0.0325927	2.9711	3.06138
SHPK	-3.31046	17.9787	0.00389523	-0.189499	-0.0423489	1.90855	2.02447
MIDN	-3.31018	11.4039	0.00663665	-0.327474	-0.0665861	3.5378	3.73483
GRK5	-3.3091	15.4609	0.00460749	-0.212151	-0.0461837	3.46622	3.59539
ALDH18A1	-3.30897	17.946	0.00391565	-0.143799	-0.0320959	3.56952	3.65747
AKT3	-3.308	14.2143	0.00508744	-0.130692	-0.0279681	3.70473	3.78406
CCNE2	-3.30773	16.8376	0.00420363	-0.37163	-0.082044	2.15753	2.38437
RAB2B	-3.30721	10.8436	0.00711854	-0.157051	-0.0314081	2.93884	3.03307
KIAA1211	-3.30692	16.8106	0.00421832	-0.182669	-0.0402954	3.07362	3.18511
PECAM1	-3.30691	15.6409	0.00456846	-0.162145	-0.0353217	5.12748	5.22621
MNAT1	-3.3008	10.4833	0.00752178	-0.153916	-0.0303224	2.71641	2.80853
CLPP	-3.30014	9.97607	0.00803699	-0.144448	-0.0279877	3.26567	3.35189
MEGF8	-3.29963	17.0401	0.00422276	-0.154996	-0.0341047	3.96536	4.05991
NT5DC3	-3.29893	17.9999	0.00399073	-0.174412	-0.0386949	2.34133	2.44788
MFSD9	-3.29831	16.6364	0.00434577	-0.172916	-0.0378631	2.46083	2.56622
NLN	-3.29557	17.0277	0.00426334	-0.223929	-0.0491354	3.11812	3.25465
RARS2	-3.29156	17.4958	0.00417854	-0.154595	-0.0339818	2.96222	3.05651
CD151	-3.29124	16.4462	0.00446728	-0.162061	-0.035251	4.09596	4.19461
GFPT1	-3.29116	16.7985	0.00436697	-0.190729	-0.0416347	3.48658	3.60276
ATP7A	-3.29033	15.8783	0.00465124	-0.152897	-0.0330316	3.00045	3.09341
FKBP8	-3.28971	11.8839	0.00654111	-0.127149	-0.0257635	3.83669	3.91314
DUBR	-3.28917	17.9013	0.00410092	-0.233563	-0.0514452	2.20034	2.34285
PNMA2	-3.2875	16.1789	0.00458381	-0.447943	-0.0969143	2.44134	2.71376
KLF6	-3.28609	14.252	0.00529952	-0.194725	-0.0410759	3.97775	4.09565
PDE7A	-3.28591	12.5265	0.00617559	-0.162375	-0.0332576	2.62151	2.71933
PPP1R16B	-3.28483	17.6931	0.00419096	-0.170462	-0.0373704	4.0926	4.19652
ARSB	-3.28477	16.1499	0.00461941	-0.259369	-0.0559947	3.23813	3.39581
CAMK2N1	-3.28389	16.0836	0.00464877	-0.25837	-0.0557053	3.23671	3.39375
CNTNAP3P2	-3.28206	15.5409	0.00484585	-0.393606	-0.0842272	1.35991	1.59883
ZNF559	-3.28031	10.1351	0.0081412	-0.163641	-0.0313995	2.40392	2.50144
PCDH10	-3.27338	17.6561	0.00430667	-0.352086	-0.076577	4.0139	4.22823
SND1	-3.27297	13.2805	0.00590412	-0.115261	-0.0237207	4.07264	4.14213
PODXL2	-3.27062	17.2974	0.00442599	-0.23869	-0.0516451	2.76064	2.90581
C3orf62	-3.27052	16.0655	0.00478762	-0.147308	-0.031467	2.2407	2.33008
PLCB1	-3.26956	15.2203	0.0050889	-0.201562	-0.0425946	3.06707	3.18915
TMEM177	-3.26688	13.8207	0.0057044	-0.228515	-0.0472489	2.19675	2.33463
SRSF5	-3.26677	17.4353	0.00442657	-0.139759	-0.0302005	3.3596	3.44458
LDLRAD3	-3.26675	11.8898	0.00681988	-0.152464	-0.0303846	3.14101	3.23243
SETD5	-3.26667	10.6153	0.00785417	-0.124297	-0.0239613	3.68136	3.75549
NAT9	-3.26648	14.2139	0.00552888	-0.130052	-0.027046	2.93279	3.01134
ARL8A	-3.2655	9.30242	0.00933509	-0.132419	-0.0243523	3.27336	3.35175
GABARAPL2	-3.26393	11.3306	0.00727306	-0.131361	-0.0257748	3.24694	3.32551
TCF25	-3.26261	14.1268	0.00561086	-0.128442	-0.0266033	3.52069	3.59821
DUSP6	-3.26078	15.5418	0.00506481	-0.144509	-0.030475	4.04038	4.12788
APMAP	-3.26028	12.6559	0.00640364	-0.12778	-0.0257585	3.70466	3.78143
MFGE8	-3.26	15.8601	0.00496301	-0.197189	-0.0417202	3.31974	3.4392
TRAPPC12	-3.25713	12.1478	0.00676457	-0.123883	-0.0246546	3.09993	3.17419
UIMC1	-3.25521	11.9794	0.00690384	-0.148266	-0.0293556	3.214	3.30281
TUSC3	-3.25456	16.8726	0.00470234	-0.309616	-0.0659863	2.90816	3.09596
PRDX4	-3.25374	17.7564	0.00447004	-0.182067	-0.0391122	3.34471	3.4553
MSH6	-3.25349	17.454	0.00455137	-0.126488	-0.0270919	3.2774	3.35419
FKBP9	-3.25254	15.0944	0.00531872	-0.192599	-0.0401543	3.53694	3.65331
MYO19	-3.2512	17.4341	0.0045795	-0.178272	-0.038116	3.0365	3.14469
CLINT1	-3.25028	12.8596	0.00640542	-0.137332	-0.0275908	3.63443	3.7169
RUNDC1	-3.2502	16.653	0.00481172	-0.149231	-0.0316371	2.96608	3.05651
PYCR2	-3.24989	9.22714	0.0096775	-0.143969	-0.0260596	2.96451	3.04952
RPS6	-3.24924	9.24232	0.00966693	-0.115607	-0.0209283	4.46765	4.53592
NFRKB	-3.24734	15.152	0.00535356	-0.0949264	-0.0197332	3.07878	3.13611
GGA2	-3.24707	13.6129	0.00603542	-0.117295	-0.0238291	3.3754	3.44596
AC004846.1	-3.24355	17.9257	0.00452771	-0.295487	-0.0631322	2.03131	2.21062
ACP1	-3.24186	12.0008	0.00706171	-0.124093	-0.0243363	3.26151	3.33572
EFNA4	-3.24184	16.2293	0.00503196	-0.181054	-0.0379846	2.7269	2.83642
CHD7	-3.24146	12.2722	0.00688157	-0.137889	-0.0271961	3.34238	3.42492
NAA40	-3.24139	13.8459	0.0059872	-0.127946	-0.0259851	3.12502	3.20198
SLFN12	-3.2411	15.4083	0.00532549	-0.15661	-0.032519	2.77001	2.86457
AL356124.1	-3.24053	17.4121	0.0046931	-0.554422	-0.117645	0.709154	1.04519
TOX2	-3.24027	16.8601	0.00485274	-0.512472	-0.108128	2.60487	2.91517
C5orf30	-3.24005	17.9594	0.0045542	-0.170291	-0.0363066	2.60942	2.71272
UVRAG	-3.23854	15.0567	0.00548871	-0.15877	-0.0327573	3.35696	3.45272
ME3	-3.23715	17.9629	0.00458244	-0.179574	-0.0382102	2.72089	2.82978
CYSLTR2	-3.23626	17.2043	0.00479482	-0.659816	-0.139311	2.39793	2.79749
HDAC7	-3.23559	13.8316	0.00606337	-0.134368	-0.0271677	3.91477	3.99553
DDA1	-3.2293	13.9024	0.00610439	-0.138417	-0.0278895	3.29596	3.37911
IMP3	-3.229	11.6152	0.00751857	-0.131897	-0.0253805	2.97079	3.04943
TMUB1	-3.22897	11.2137	0.00784423	-0.114263	-0.0217599	3.08162	3.14963
KDELR2	-3.22681	17.9821	0.00468289	-0.156511	-0.0330696	3.96267	4.05746
ETV1	-3.22601	15.2618	0.00555074	-0.162815	-0.0333804	2.73005	2.82815
ATP9A	-3.22532	17.8773	0.00472542	-0.176951	-0.0373137	3.56397	3.6711
KDM5A	-3.22368	12.4851	0.00697396	-0.101674	-0.0198746	3.50921	3.56999
TBC1D9B	-3.22347	15.8945	0.00534596	-0.137605	-0.028384	3.89958	3.98257
NEK3	-3.22009	17.0373	0.0050144	-0.225703	-0.0470343	2.398	2.53437
SLC35C2	-3.2188	12.537	0.00700494	-0.154435	-0.030108	2.95951	3.05179
UBTD1	-3.21538	11.4934	0.00780499	-0.171137	-0.0324825	3.54729	3.6491
FAM114A2	-3.21429	11.9966	0.00743523	-0.129987	-0.0249557	2.98339	3.06086
POM121	-3.21357	16.087	0.00539062	-0.137542	-0.0282329	3.04142	3.1243
PIK3R1	-3.21205	11.2658	0.00804157	-0.291208	-0.0547968	3.00225	3.17526
STK17A	-3.21133	17.6971	0.00492121	-0.17483	-0.0364417	3.29639	3.40203
TMEM140	-3.21128	15.9757	0.00545555	-0.248085	-0.0507721	2.76068	2.91011
SLC36A4	-3.21126	16.4444	0.00529656	-0.131308	-0.0270183	2.78601	2.86517
NAA60	-3.20993	10.6376	0.00865014	-0.136773	-0.0252285	3.27761	3.35861
JAG2	-3.20965	17.0829	0.00511485	-0.250063	-0.0517463	3.54406	3.69497
AL590004.4	-3.20792	14.7903	0.00595635	-0.710198	-0.142762	1.88195	2.30843
CRACR2B	-3.2074	15.7721	0.00557352	-0.276893	-0.0563678	2.45231	2.61894
PHKA2	-3.2067	8.80738	0.0110169	-0.112765	-0.0192933	2.80252	2.86855
C1GALT1	-3.20662	15.675	0.00561842	-0.15668	-0.0318391	2.93659	3.03085
MCRIP2	-3.20486	15.8598	0.00557115	-0.152647	-0.0310504	2.40746	2.49931
CCDC24	-3.20339	16.1537	0.00548429	-0.150253	-0.0306377	1.98514	2.07558
EFEMP1	-3.20315	17.3165	0.00511784	-0.393668	-0.0812736	4.92369	5.16116
ZNF207	-3.19997	17.7382	0.00503357	-0.16023	-0.0331399	3.63709	3.73378
NOCT	-3.19991	17.971	0.00497119	-0.259714	-0.0538306	2.5732	2.72998
LINC01547	-3.19743	17.7759	0.00505122	-0.341333	-0.0704922	1.6209	1.82681
CD36	-3.19631	16.7141	0.00537917	-0.960524	-0.196079	2.01773	2.59603
RAB5C	-3.19467	10.9787	0.00855499	-0.121479	-0.0223582	3.45134	3.52326
PALD1	-3.19419	16.6161	0.00543531	-0.451673	-0.0919612	3.54207	3.81389
SYVN1	-3.19388	13.4023	0.00681602	-0.126881	-0.0246774	3.1667	3.24248
EPOR	-3.19175	17.8319	0.00509893	-0.178318	-0.0366939	2.89761	3.00511
TMEM135	-3.19	17.3732	0.00524908	-0.148337	-0.0303496	2.71386	2.80321
IPPK	-3.18949	17.3919	0.00524927	-0.200265	-0.0409666	2.62005	2.74067
ACO1	-3.18908	12.3977	0.00750464	-0.125393	-0.0238145	3.39239	3.46699
TMEM181	-3.18882	16.4125	0.00556595	-0.172632	-0.0349286	3.5666	3.67038
RABAC1	-3.18833	10.2915	0.00934871	-0.113528	-0.0203361	3.38274	3.44968
ZFP41	-3.18811	15.2065	0.00602456	-0.166579	-0.0331832	2.48122	2.5811
PDK3	-3.18803	13.3214	0.00694026	-0.207319	-0.0400796	2.27771	2.40141
MSRB1	-3.18791	9.72655	0.0100239	-0.125775	-0.0220559	2.81172	2.88563
NDST1	-3.18742	16.3454	0.00560536	-0.222458	-0.0449285	4.13228	4.26598
USP4	-3.18661	13.189	0.00703631	-0.149141	-0.0287291	3.30718	3.39612
AREL1	-3.18335	14.0064	0.00663342	-0.13192	-0.0257166	3.36166	3.44048
TIGD5	-3.18259	11.2525	0.00849151	-0.143979	-0.0264425	2.96249	3.04771
SEC24C	-3.17986	11.959	0.00795428	-0.131327	-0.0245089	3.74221	3.82013
ECHDC2	-3.17903	15.8638	0.00587926	-0.142636	-0.0284615	2.46326	2.54881
C19orf48	-3.17874	13.9461	0.00672546	-0.164088	-0.0318412	3.05707	3.15504
TRAPPC1	-3.17678	12.269	0.00777121	-0.14665	-0.027499	3.27796	3.36503
SEMA3G	-3.17471	16.6296	0.00566135	-0.695359	-0.139556	2.88983	3.30729
NALCN	-3.17343	16.9033	0.00558694	-0.372449	-0.0749031	2.07771	2.30139
ASPH	-3.17332	15.5264	0.00608043	-0.116018	-0.0229506	3.68909	3.75858
AC007318.1	-3.17234	17.5946	0.00538826	-0.167038	-0.0338065	1.44915	1.54957
MED12	-3.17201	17.9966	0.00527816	-0.113702	-0.0230955	3.5198	3.5882
EML3	-3.17171	10.097	0.00984333	-0.106093	-0.0186057	3.45846	3.52081
MTMR4	-3.17034	12.4341	0.00774901	-0.161238	-0.0301881	3.19356	3.28928
JOSD2	-3.16973	11.9417	0.00811829	-0.15213	-0.0281452	2.69642	2.78655
PLEKHA8	-3.16929	13.1917	0.0072749	-0.138047	-0.0262309	3.21877	3.30091
PIN1	-3.16739	15.0504	0.00635363	-0.139464	-0.0272851	3.14732	3.23069
EVC	-3.16645	11.3865	0.0086234	-0.161664	-0.0294025	3.23062	3.32615
YIPF6	-3.16128	11.6243	0.00850147	-0.123119	-0.0224378	3.16511	3.23789
PIH1D1	-3.16097	15.8568	0.00610838	-0.143113	-0.0281627	3.05768	3.14332
CRYL1	-3.16025	17.9853	0.0054193	-0.26869	-0.0540927	2.80757	2.96897
TMEM268	-3.15937	13.5902	0.00718312	-0.204698	-0.0388754	2.51088	2.63267
RPS14	-3.15852	10.7263	0.00937376	-0.133293	-0.0236131	4.10498	4.18343
OAT	-3.15509	12.8398	0.00769977	-0.11259	-0.0210008	3.55203	3.61883
C20orf194	-3.15449	12.8244	0.00771867	-0.192293	-0.0358383	3.18333	3.29739
SLC25A29	-3.15357	17.9938	0.00549692	-0.163225	-0.0326973	3.42938	3.52734
ANKRD52	-3.14948	16.2084	0.00612404	-0.142247	-0.0278648	3.69868	3.78373
ZBED6	-3.14756	17.7669	0.00563553	-0.138939	-0.0276441	2.3237	2.40699
LINC00607	-3.14746	16.1887	0.00615745	-0.215675	-0.042172	3.48054	3.60946
PIGW	-3.14604	17.4577	0.00574742	-0.175282	-0.0347259	2.47373	2.57874
DARS	-3.14577	12.5883	0.00800823	-0.166221	-0.0306016	3.1235	3.22191
PFKFB3	-3.14547	17.578	0.00571775	-0.315395	-0.0625336	3.34074	3.5297
SERPINE1	-3.1432	17.7183	0.00570385	-0.452249	-0.0896374	4.86619	5.13713
LONRF1	-3.14285	12.4614	0.00814209	-0.208936	-0.0382636	2.4042	2.5278
C1orf54	-3.14195	17.7097	0.00572195	-0.226886	-0.0449226	2.67288	2.80878
CORO1B	-3.14074	12.4185	0.00820536	-0.144926	-0.0264684	3.70333	3.78902
IGSF8	-3.14067	15.5729	0.00648729	-0.224355	-0.043293	2.67954	2.81336
DDX5	-3.139	12.5007	0.00817347	-0.131236	-0.0239776	4.25243	4.33003
COPB1	-3.13826	15.4425	0.00657402	-0.128489	-0.0247029	3.88348	3.96008
SLC43A2	-3.13709	16.9745	0.00601572	-0.244711	-0.0478975	3.12916	3.27546
BCL2L2	-3.13615	12.2619	0.00839198	-0.122483	-0.0222019	2.93139	3.00374
RASAL2	-3.13279	14.5328	0.0070639	-0.216831	-0.0409518	3.27024	3.39913
LINC00639	-3.12474	17.9095	0.00588031	-0.314157	-0.0614954	2.38541	2.57323
MAPKAPK2	-3.12465	10.8149	0.00985727	-0.103082	-0.0177737	3.70859	3.76902
P4HA1	-3.12284	12.5023	0.00842616	-0.244173	-0.0440037	3.60984	3.75393
OXNAD1	-3.11926	13.5986	0.00776643	-0.122795	-0.0225672	2.3148	2.38748
ZKSCAN2	-3.11906	14.8352	0.007115	-0.154123	-0.0289184	2.7025	2.79402
ARHGAP24	-3.11894	17.4561	0.00609545	-0.220321	-0.0427318	3.44612	3.57764
DNAJC30	-3.11585	14.3594	0.00739789	-0.113824	-0.0211398	2.80719	2.87468
HMCN2	-3.11464	16.1998	0.00659393	-0.750824	-0.143044	0.789816	1.23675
CASC15	-3.11294	13.8341	0.00772659	-0.269215	-0.0494267	2.48511	2.64443
SOX17	-3.11249	15.3176	0.00698854	-0.436816	-0.0821003	3.04584	3.30529
FAM35A	-3.11204	17.9757	0.00602596	-0.233468	-0.0452731	2.40132	2.54069
ZNF280B	-3.11052	12.8825	0.00835651	-0.196531	-0.0353391	2.15331	2.26925
NMB	-3.10857	17.9841	0.00606926	-0.190702	-0.036881	2.16011	2.2739
ARL5A	-3.10607	11.4545	0.00955805	-0.173428	-0.0299836	3.14736	3.24907
GPR161	-3.10481	13.9308	0.00779671	-0.0922894	-0.0168567	3.51698	3.57156
NR2F6	-3.10261	14.6687	0.00743896	-0.142365	-0.0262799	3.2927	3.37702
MAN2B1	-3.10046	17.7513	0.00624978	-0.144419	-0.0276828	3.30984	3.39589
SEC61B	-3.10025	14.3656	0.00763	-0.139917	-0.0256493	3.35739	3.44017
TMEM237	-3.09963	14.8876	0.00737653	-0.208741	-0.0385678	2.80311	2.92677
SLC1A4	-3.09729	15.7737	0.0070124	-0.240046	-0.0448349	2.90011	3.04255
ANKRD9	-3.0963	16.0488	0.00691368	-0.103959	-0.0194719	2.97131	3.03302
ADGRF5	-3.09607	16.8034	0.00662944	-0.747918	-0.141371	2.98998	3.43462
SLC25A22	-3.09245	17.7556	0.0063583	-0.176452	-0.0336046	2.91624	3.02127
IDS	-3.09162	15.0324	0.00742814	-0.16086	-0.0295859	3.22253	3.31775
TRAF3	-3.09028	16.3442	0.00688422	-0.165718	-0.031001	3.14238	3.24074
OST4	-3.08907	9.64815	0.0119417	-0.109585	-0.017479	3.62796	3.6915
CDH13	-3.08669	15.1152	0.00746393	-0.211931	-0.0388645	3.76378	3.88917
CENPX	-3.08309	17.9963	0.00641313	-0.190962	-0.0361787	2.65786	2.77143
PATZ1	-3.08231	12.2225	0.00931527	-0.146573	-0.0253145	3.10661	3.19256
EIF2B2	-3.08153	12.3747	0.00920896	-0.339276	-0.0587745	3.41649	3.61552
MTHFD1L	-3.08093	17.765	0.00651669	-0.17782	-0.0335485	3.32489	3.43057
MYO9B	-3.08073	16.0353	0.00714855	-0.134409	-0.024844	3.78637	3.86599
SPHK1	-3.07973	17.9951	0.00646085	-0.318734	-0.0602171	3.36163	3.55111
CD99L2	-3.07885	13.9059	0.00822297	-0.190839	-0.0340661	3.40606	3.51851
TET3	-3.07769	14.5048	0.00790914	-0.148276	-0.0267208	3.28373	3.37123
CCDC130	-3.07484	12.7879	0.00901574	-0.148128	-0.0257534	2.85069	2.93763
EIF4BP6	-3.07326	12.7862	0.00904417	-0.317931	-0.0551939	0.906971	1.09353
ANKRD37	-3.07296	12.6086	0.00917996	-0.32835	-0.0567546	2.35631	2.54886
ATXN7L3B	-3.0723	10.1409	0.011611	-0.109823	-0.0175914	3.59023	3.65394
GPR176	-3.07205	16.7335	0.00700384	-0.139972	-0.0259097	2.99583	3.07877
TRNAU1AP	-3.07197	16.7658	0.00699291	-0.143565	-0.0265835	2.6354	2.72047
MSX1	-3.07119	13.6764	0.00848661	-0.325634	-0.0574849	2.03466	2.22622
GLT8D1	-3.07033	12.4121	0.00937608	-0.11855	-0.0203461	3.26888	3.33833
MED22	-3.0698	12.5007	0.00931686	-0.133451	-0.0229415	3.14594	3.22414
PPM1H	-3.06702	14.9368	0.0078582	-0.377041	-0.0677889	2.31761	2.54003
PPM1M	-3.06655	14.0179	0.00835988	-0.177117	-0.0313381	2.59113	2.69536
GADD45B	-3.06606	13.0364	0.00899153	-0.50845	-0.08818	2.79719	3.0955
LINC01776	-3.06444	17.1669	0.00695903	-0.508199	-0.0939415	0.94337	1.24444
SS18L2	-3.06386	13.6842	0.00860498	-0.138077	-0.0242189	2.52915	2.6103
FBXO21	-3.06167	11.9518	0.00990976	-0.125411	-0.0211006	3.3137	3.38696
RND1	-3.06079	17.1683	0.00701311	-0.448398	-0.082631	2.09223	2.35774
COL18A1	-3.06004	16.4598	0.00729146	-0.234994	-0.0429078	4.88899	5.02794
AC022075.1	-3.05964	16.582	0.00724964	-0.65305	-0.119383	1.71531	2.10153
BPHL	-3.05865	15.3549	0.00779026	-0.226388	-0.040664	2.40309	2.53662
QSOX1	-3.05651	16.4397	0.00735402	-0.160532	-0.0292148	3.91686	4.01174
KIAA0319L	-3.05431	14.666	0.00820405	-0.130448	-0.0230892	3.44971	3.52648
ZFP36	-3.05197	10.5835	0.0114754	-0.438346	-0.0699858	2.46924	2.72341
ZDHHC12	-3.05021	16.7924	0.00731419	-0.137336	-0.0249664	2.74073	2.82188
ENTPD4	-3.04833	11.2903	0.0107789	-0.138951	-0.0226415	3.35338	3.43418
SERTAD4	-3.04623	16.7858	0.00737896	-0.21273	-0.0385348	2.69661	2.82224
ABAT	-3.04617	16.9456	0.00731907	-0.389884	-0.0707591	1.98349	2.21381
PSKH1	-3.04607	13.7812	0.00885056	-0.141203	-0.0244148	3.34948	3.43228
HIF1AN	-3.04604	11.9564	0.0101972	-0.119006	-0.0197293	3.20074	3.27011
ADGRL4	-3.04516	17.2091	0.00723748	-0.163664	-0.0297693	4.10723	4.20395
REXO2	-3.04421	17.9745	0.00698833	-0.127058	-0.0232882	3.2887	3.36387
HEATR6	-3.04319	15.7262	0.00786936	-0.147615	-0.026296	2.62568	2.71263
NLRC3	-3.04308	17.0453	0.00733021	-0.658519	-0.119331	1.71653	2.10546
AC004656.1	-3.04041	16.4765	0.00759336	-0.189577	-0.0340325	2.17125	2.28305
AUTS2	-3.03959	16.1419	0.00774561	-0.162621	-0.0290436	2.87893	2.97476
RAVER2	-3.03802	17.8481	0.00712532	-0.244871	-0.0445804	2.6873	2.83203
CDH2	-3.03763	17.9963	0.00708206	-0.33727	-0.0614788	3.18801	3.38738
NEK6	-3.03726	15.9844	0.00785164	-0.131846	-0.0234477	3.34106	3.4187
AC099489.1	-3.03541	17.1569	0.00740978	-0.478176	-0.086182	1.45636	1.73854
BCKDHB	-3.03055	14.2101	0.00886489	-0.171371	-0.0294454	2.49062	2.59103
SCYL1	-3.02975	16.9411	0.00758181	-0.111794	-0.0199958	3.5239	3.5898
PPP2R5E	-3.02971	13.8244	0.00911344	-0.129414	-0.022057	3.40746	3.48319
HHIP	-3.02957	17.6297	0.00733253	-0.408513	-0.0736455	4.31928	4.56036
CHMP6	-3.0261	11.7007	0.0108166	-0.117772	-0.0190088	3.03958	3.10797
PDGFD	-3.02609	17.3688	0.00748105	-0.322262	-0.0577455	2.7737	2.96371
CDCA4	-3.02543	16.8214	0.00769858	-0.175017	-0.031137	2.88141	2.98448
TAF9	-3.02518	14.139	0.00900246	-0.132947	-0.022699	3.09381	3.17164
PDZD2	-3.02482	12.6316	0.0100407	-0.481818	-0.0796308	2.2388	2.51952
MPHOSPH6	-3.02427	17.2245	0.00756345	-0.206674	-0.0369111	2.67183	2.79362
NDUFA11	-3.02404	16.4943	0.00785318	-0.128062	-0.0226599	2.74645	2.82181
MGLL	-3.02285	17.9439	0.00733153	-0.269267	-0.0484202	3.42489	3.58373
GPATCH8	-3.02249	12.8558	0.00991266	-0.103286	-0.0171233	3.3789	3.43911
CCDC57	-3.01991	17.5872	0.00750234	-0.107467	-0.0191986	2.57538	2.63872
GCA	-3.01895	15.0009	0.00863261	-0.274227	-0.0472543	2.3049	2.46564
IGF2BP1	-3.01648	14.2156	0.00911385	-0.123051	-0.0208673	3.5165	3.58846
NDFIP2	-3.01506	15.8552	0.00828285	-0.169792	-0.0295378	2.91793	3.0176
RPS19BP1	-3.01264	17.9195	0.00750447	-0.184224	-0.0328173	3.05895	3.16747
TMEM132A	-3.01212	17.9999	0.00748542	-0.182499	-0.0325233	3.92994	4.03745
SUPT20H	-3.01208	17.8031	0.00755387	-0.128261	-0.0228074	3.15592	3.23145
ARSD	-3.01118	17.7256	0.00759587	-0.297764	-0.0528595	3.09173	3.26704
PDCD1LG2	-3.01106	15.7841	0.00838486	-0.381916	-0.0661259	1.92707	2.15109
NAALADL2	-3.01057	13.8874	0.00942408	-0.219065	-0.0367084	1.87699	2.00488
AP5B1	-3.01003	10.3082	0.0126995	-0.133042	-0.0201221	3.07469	3.15127
CNTRL	-3.009	17.4562	0.00772877	-0.221861	-0.0391865	2.71585	2.84637
UBALD2	-3.00885	11.4185	0.0114441	-0.140278	-0.0220576	3.3765	3.45767
PTBP1	-3.00815	17.8963	0.00758606	-0.145373	-0.0257849	4.13177	4.21735
PCK2	-3.00754	11.0499	0.0118628	-0.150983	-0.0234207	2.46854	2.55574
RPUSD2	-3.00753	14.5242	0.00909736	-0.126458	-0.0213829	2.50319	2.57711
KBTBD4	-3.00468	14.3219	0.00926736	-0.148201	-0.0248994	2.86086	2.94741
PGM1	-3.00308	13.1072	0.010099	-0.349587	-0.0571964	3.02398	3.22737
KLHDC8B	-3.00132	12.3473	0.0107341	-0.276516	-0.0443253	2.98725	3.14767
MRPL15	-3.00089	15.324	0.00878846	-0.186587	-0.0317752	3.28067	3.38985
ATAD3A	-3.00087	17.2346	0.00794858	-0.15862	-0.0277354	3.03086	3.12404
NIPSNAP2	-3.00061	16.8809	0.00809163	-0.170791	-0.0297261	3.2328	3.33306
ARF5	-3.00052	15.0024	0.008962	-0.139659	-0.0236513	3.39576	3.47742
MED25	-2.99959	13.3787	0.00997193	-0.108945	-0.0178714	3.28917	3.35258
INTS11	-2.9994	11.8576	0.0112109	-0.0929214	-0.0146648	3.38308	3.43688
LCAT	-2.99918	16.6447	0.00821285	-0.178793	-0.0309829	2.16165	2.26654
MAFG	-2.99769	10.8675	0.0122814	-0.131789	-0.0201011	3.38285	3.45879
SDHAF1	-2.99717	13.5701	0.0098867	-0.160719	-0.0264099	2.38978	2.48334
FAM96B	-2.99514	10.3561	0.0129687	-0.110526	-0.0164815	3.09382	3.15733
SIMC1	-2.99477	12.7127	0.0105654	-0.144088	-0.0231605	2.511	2.59463
PLEKHO1	-2.99473	15.889	0.00862469	-0.138736	-0.0236916	3.52737	3.60859
FNDC3B	-2.99464	17.4691	0.00796658	-0.184406	-0.0321484	4.16012	4.2684
SPOCD1	-2.99408	14.8386	0.0091692	-0.378855	-0.0635873	2.76056	2.98178
DCAF7	-2.99314	11.1511	0.0120605	-0.115389	-0.0176911	3.81074	3.87728
C4orf48	-2.99287	15.0355	0.00908492	-0.131665	-0.0221467	2.8901	2.96701
G3BP2	-2.99236	11.5458	0.0116622	-0.106634	-0.0165487	3.96208	4.02367
ETFA	-2.99009	16.9065	0.00826421	-0.13192	-0.0227434	3.37394	3.45127
NR1D2	-2.98978	17.9106	0.00788955	-0.159924	-0.0278956	3.04424	3.13815
E2F3	-2.98802	16.5751	0.00843865	-0.153293	-0.0262623	2.9904	3.08017
UBL4A	-2.98724	17.0737	0.00824736	-0.123436	-0.0212683	3.09164	3.16399
BLCAP	-2.98479	17.5607	0.00810272	-0.130822	-0.0226224	3.55968	3.63641
C1orf35	-2.98444	11.2096	0.0121865	-0.131957	-0.0200839	2.77243	2.84845
LCMT2	-2.98368	17.6092	0.00810423	-0.158934	-0.0274703	2.41511	2.50831
KLHL36	-2.98356	9.93596	0.0138169	-0.115966	-0.0167593	3.22664	3.293
DSN1	-2.98239	17.7316	0.00808158	-0.212374	-0.0367149	2.52702	2.65157
GBP2	-2.97966	17.9997	0.0080329	-0.190814	-0.0330029	3.29294	3.40484
COG3	-2.97959	12.2928	0.0112298	-0.108427	-0.0169714	2.99226	3.05496
FKBP10	-2.9788	13.1492	0.0105517	-0.10912	-0.0174391	3.9871	4.05038
ZNF12	-2.97829	11.4038	0.0121132	-0.122497	-0.0186425	3.02412	3.09469
UBE2J1	-2.97816	9.90201	0.0139947	-0.165944	-0.0237968	3.79533	3.8902
PTPRU	-2.97753	17.8179	0.00813548	-0.357897	-0.0616502	2.39026	2.60003
ZNF281	-2.97739	11.9939	0.0115473	-0.135698	-0.0210128	3.17497	3.25333
NFATC2	-2.97672	13.9426	0.0100397	-0.397882	-0.0645565	2.97339	3.20461
SELENOH	-2.97668	9.05695	0.0154274	-0.106985	-0.014642	2.9927	3.05351
DNAAF2	-2.97566	10.5269	0.0131921	-0.146325	-0.021504	2.65036	2.73428
FAM91A1	-2.97479	11.8834	0.0117078	-0.132698	-0.0204248	3.21374	3.2903
ZC4H2	-2.97382	16.9778	0.00852578	-0.153914	-0.0261514	2.62783	2.71786
KMT5C	-2.97289	15.4982	0.00921825	-0.136613	-0.0227062	2.29662	2.37628
HDAC4	-2.97251	11.2991	0.0123534	-0.19198	-0.0289328	2.98526	3.09571
OTUD5	-2.96956	9.52253	0.0147954	-0.115701	-0.0161176	3.3925	3.45841
UNK	-2.96793	16.9387	0.00864943	-0.114699	-0.0193682	2.93952	3.00656
BACH1	-2.96779	17.9997	0.00824247	-0.141153	-0.0241405	3.09705	3.1797
TINF2	-2.9673	12.23	0.0115482	-0.139385	-0.0214983	3.08633	3.16678
FCHSD1	-2.96355	17.1449	0.00864569	-0.140729	-0.0237254	2.94907	3.0313
PAPSS2	-2.96347	17.4236	0.00853629	-0.200322	-0.0338874	3.58114	3.69824
LRRC3	-2.96159	14.4399	0.0100284	-0.34538	-0.0557264	2.60452	2.80507
NFIC	-2.96086	14.6549	0.00991429	-0.121415	-0.0196541	3.79137	3.86191
LSM14B	-2.96037	13.2323	0.0108712	-0.130584	-0.0205143	3.12792	3.20347
PPP2R5A	-2.95976	10.877	0.0131267	-0.178117	-0.026068	3.37596	3.47806
LCORL	-2.95912	10.5589	0.0135385	-0.17072	-0.0246559	2.91162	3.00931
TP53I11	-2.95908	17.9938	0.00840189	-0.284992	-0.0483301	3.79417	3.96083
LBH	-2.95883	14.7134	0.00992055	-0.386528	-0.0625072	2.56987	2.79438
ZNF292	-2.95768	17.6102	0.00857078	-0.14165	-0.0238815	3.34529	3.42806
LINC02407	-2.95683	16.5403	0.009028	-0.351167	-0.0583445	1.88148	2.08624
UCKL1	-2.95433	10.6232	0.01357	-0.0983091	-0.0141572	3.14887	3.2051
MAD2L2	-2.95395	15.532	0.00956726	-0.157823	-0.0257548	2.83583	2.92762
PKP4	-2.95323	15.3604	0.00967131	-0.192749	-0.0313436	3.29368	3.40573
UNKL	-2.95285	15.6511	0.00952784	-0.145177	-0.0237098	2.92786	3.01231
YPEL1	-2.95278	16.1051	0.00930582	-0.335397	-0.0551549	2.54362	2.7389
TST	-2.9522	17.4029	0.00875349	-0.160123	-0.0267836	3.12475	3.2182
GRK2	-2.95188	12.4947	0.0116504	-0.107784	-0.0164711	3.52564	3.58777
FASTK	-2.95086	17.9334	0.00857524	-0.123006	-0.0206793	3.2061	3.27795
SNAP23	-2.95	16.1157	0.00935487	-0.167296	-0.0274389	3.64443	3.7418
CDKN2A	-2.94882	17.9007	0.00862531	-0.571849	-0.0959084	1.00391	1.33779
RAP2C	-2.94767	14.3094	0.0103937	-0.145538	-0.0230895	3.14582	3.23013
METTL26	-2.94706	10.7238	0.0136165	-0.111257	-0.0159523	3.04913	3.11274
CCDC85A	-2.94619	13.7888	0.0107693	-0.288877	-0.0452713	2.75226	2.91934
RNF169	-2.94602	16.2551	0.00936685	-0.114315	-0.0187127	3.32079	3.38731
OS9	-2.94599	12.7419	0.0115695	-0.153166	-0.0234106	4.04556	4.13385
SLC15A4	-2.94495	14.1623	0.0105449	-0.159569	-0.0251695	2.81774	2.91011
CAV1	-2.94247	15.1726	0.00998966	-0.195255	-0.031304	4.60468	4.71796
PPP1R16A	-2.94241	13.4337	0.0111042	-0.085363	-0.0132191	3.02318	3.07248
RPL29	-2.94203	11.308	0.0130442	-0.12169	-0.0177317	3.75398	3.82369
CDK17	-2.94157	15.2206	0.00998143	-0.153462	-0.0246011	3.71945	3.80848
ADIPOR1	-2.93996	13.547	0.011074	-0.122272	-0.0189341	3.50064	3.57124
ANKS6	-2.93981	12.2512	0.0121387	-0.133177	-0.0199477	3.0029	3.07946
ACADS	-2.93914	17.9989	0.008771	-0.214434	-0.0356623	2.41512	2.54017
PPP2R2A	-2.93819	16.4853	0.00941441	-0.173984	-0.0283491	3.65331	3.75448
GNB1	-2.93587	14.1299	0.0107582	-0.120126	-0.0187548	4.28716	4.3566
DPP7	-2.93494	14.7186	0.0104073	-0.11821	-0.0186511	3.5878	3.65623
WDR54	-2.93465	13.5314	0.011201	-0.148215	-0.0228124	2.74063	2.82615
HGS	-2.93455	17.8388	0.00891925	-0.129731	-0.0214361	3.63632	3.71191
SEC22B	-2.93395	15.5035	0.00998427	-0.132027	-0.0210985	3.00561	3.08217
MAP7D3	-2.93376	17.8612	0.00892585	-0.121532	-0.0200709	2.85402	2.92482
MEIS1	-2.92917	17.5358	0.00914232	-0.268341	-0.0439366	2.41719	2.57333
MMS19	-2.9289	11.0704	0.013633	-0.106062	-0.0150903	3.61188	3.67245
TOMM20	-2.92469	13.0316	0.0118079	-0.132155	-0.0198796	3.60853	3.68454
B2M	-2.92422	12.8668	0.011954	-0.163504	-0.0244789	4.20722	4.30122
CCDC85C	-2.92392	17.9409	0.00908679	-0.122143	-0.0199914	3.26905	3.34012
COPB2	-2.92331	17.1683	0.00940983	-0.109418	-0.0177249	3.93385	3.99742
COMTD1	-2.92318	17.9379	0.00910262	-0.0774584	-0.0126677	2.26404	2.3091
MROH1	-2.92291	17.3111	0.00935794	-0.104056	-0.0168807	3.31704	3.37751
HUS1	-2.92229	17.9915	0.00909971	-0.169367	-0.0276911	2.71625	2.81478
PI4K2A	-2.92133	8.60641	0.0178088	-0.116997	-0.0144758	3.04252	3.10826
RELT	-2.92125	17.6914	0.00923663	-0.202448	-0.0329449	2.61744	2.73514
FAR2	-2.92124	11.786	0.0130266	-0.145064	-0.0209743	3.4509	3.53392
MED19	-2.92116	11.3503	0.0134985	-0.139446	-0.0198631	2.76018	2.83984
PSMD13	-2.92074	17.8786	0.0091735	-0.147855	-0.0241033	3.57295	3.65893
GTPBP2	-2.92027	15.6721	0.0101791	-0.0969002	-0.0153071	3.25456	3.31067
SHTN1	-2.91997	17.3527	0.00939952	-0.192186	-0.0311005	2.78749	2.89913
MARVELD2	-2.91937	13.631	0.0114665	-0.378479	-0.0574198	2.32003	2.53798
GAREM1	-2.91934	16.3935	0.00983799	-0.372123	-0.0593877	1.81194	2.02769
CYBA	-2.91905	17.3705	0.00941067	-0.169293	-0.0273761	3.11475	3.21309
AGO4	-2.91867	14.4625	0.010914	-0.166811	-0.025739	2.9771	3.07337
REPS2	-2.91833	14.3229	0.0110115	-0.211241	-0.0324914	2.33119	2.45306
SEC23IP	-2.91599	16.7563	0.00973895	-0.124051	-0.0198316	3.39014	3.46208
NRSN2	-2.91583	12.4127	0.0125462	-0.119314	-0.0174757	3.08681	3.15521
CBL	-2.91568	12.2088	0.0127406	-0.127005	-0.0184879	3.65129	3.72403
PRELID2	-2.91146	17.0541	0.00969975	-0.185873	-0.0296964	2.05419	2.16198
EIF2S2	-2.90995	16.5683	0.00995064	-0.114434	-0.0181296	3.36242	3.4287
PRDM4	-2.90979	12.4315	0.0126726	-0.122748	-0.0178637	3.32353	3.39384
ABT1	-2.9095	11.386	0.0137465	-0.112945	-0.0158872	2.96378	3.02819
ARID3B	-2.90782	15.0619	0.0107851	-0.221562	-0.0341735	2.10179	2.22965
APLP2	-2.90699	12.8167	0.0123972	-0.19997	-0.0293211	4.60664	4.72129
HOOK3	-2.90679	11.1326	0.0141096	-0.103473	-0.0143719	3.61932	3.67824
SYDE2	-2.90554	15.6915	0.0104825	-0.25056	-0.0389751	1.82127	1.96604
TCAF1	-2.90519	13.4415	0.0119322	-0.0928296	-0.0138007	2.89556	2.94887
FLT1	-2.90391	16.1056	0.0103031	-0.179681	-0.0280872	4.14047	4.24435
PPP2CB	-2.90371	16.7344	0.0100047	-0.136155	-0.0214798	3.48272	3.56154
SLC43A3	-2.90364	13.0931	0.0122446	-0.109385	-0.0160937	3.28923	3.35197
FAM174A	-2.90357	14.1142	0.0114812	-0.159999	-0.0241075	2.51387	2.60592
ZNF823	-2.90209	10.6706	0.0148138	-0.16703	-0.0226387	2.16138	2.25622
ERGIC1	-2.90192	11.6314	0.0136642	-0.127547	-0.0179329	3.83152	3.90426
H1FX	-2.90177	13.0262	0.012344	-0.146517	-0.0214736	3.62437	3.70836
RPSAP52	-2.90066	16.4089	0.010223	-0.288402	-0.0451345	1.41277	1.57953
CXCL1	-2.8995	17.951	0.00957486	-0.514175	-0.082066	2.0642	2.36232
DEDD2	-2.89914	10.7909	0.0147326	-0.0992738	-0.0134744	2.90541	2.96179
NUDT14	-2.89271	17.8513	0.00975587	-0.189529	-0.0299966	2.94786	3.05763
SLC25A32	-2.89163	15.2106	0.011058	-0.139898	-0.0212541	3.02578	3.10635
PFKFB4	-2.88851	12.5428	0.0130879	-0.264658	-0.0376873	2.03017	2.18134
ETNK2	-2.88771	14.589	0.0115291	-0.175247	-0.0261949	2.70835	2.80907
ARHGEF26	-2.8866	15.3908	0.0110675	-0.267635	-0.0405646	1.83749	1.99159
PLOD2	-2.88424	16.8917	0.0103503	-0.266652	-0.041286	4.13647	4.29044
RPS21	-2.88338	12.4141	0.0133359	-0.107857	-0.015207	3.83102	3.89255
CSNK1G1	-2.88269	11.2115	0.0146386	-0.123536	-0.0167053	3.20875	3.27887
CADM4	-2.88234	17.9671	0.00992949	-0.196935	-0.0308683	2.96407	3.07798
VDAC2	-2.88223	15.8643	0.0109049	-0.130149	-0.0197905	2.95607	3.03104
SYNGR2	-2.88116	13.0653	0.0128094	-0.118864	-0.0170236	3.43707	3.50502
ARHGAP39	-2.88033	12.7348	0.0131169	-0.125795	-0.0178367	2.66799	2.73981
AC026471.1	-2.8797	17.9125	0.0100082	-0.16594	-0.0259182	2.15793	2.25385
PGBD1	-2.87888	10.3764	0.0158461	-0.137326	-0.0178297	2.56395	2.64153
PLD3	-2.87793	12.8123	0.0131078	-0.167192	-0.0236897	3.84836	3.9438
LZTS2	-2.87762	8.59945	0.0191083	-0.10981	-0.0127636	3.49085	3.55213
C7orf50	-2.87761	16.8262	0.0105269	-0.155318	-0.0238508	3.15697	3.24655
MEGF6	-2.8766	16.3425	0.0107841	-0.24018	-0.0365736	3.83241	3.97079
PDE3B	-2.87611	17.706	0.0101707	-0.256391	-0.0397848	1.87768	2.02576
RPL13A	-2.87588	11.9585	0.0139798	-0.118533	-0.0163239	4.28445	4.35188
ZDHHC23	-2.87528	17.918	0.0101015	-0.228134	-0.035464	2.16933	2.30113
DTD1	-2.87513	17.9908	0.0100754	-0.208405	-0.0324213	2.95288	3.0733
GPSM3	-2.87369	17.7944	0.0101869	-0.16194	-0.0250906	2.7184	2.81192
KNTC1	-2.87339	17.6534	0.0102523	-0.19314	-0.0298603	2.72278	2.83428
AL162586.1	-2.87088	17.9918	0.0101675	-0.228085	-0.035319	1.4755	1.6072
KAZALD1	-2.8703	16.4376	0.010879	-0.244356	-0.0370028	1.5692	1.70988
MPI	-2.87018	17.9972	0.0101808	-0.134216	-0.0207686	3.00048	3.07797
FHL1	-2.86983	14.3661	0.0120994	-0.217989	-0.0317729	3.37048	3.49536
FAM57A	-2.86961	13.831	0.0124866	-0.174305	-0.0250975	3.09292	3.19263
ZNF792	-2.86781	12.9988	0.0131994	-0.189392	-0.0266459	2.95726	3.06527
CAMK2G	-2.86742	13.4618	0.0128252	-0.103978	-0.0147997	3.10876	3.16815
PIEZO1	-2.86661	16.4535	0.0109554	-0.120145	-0.0181225	4.27755	4.34669
PANX1	-2.86455	17.8853	0.0103509	-0.218898	-0.0336148	2.80432	2.93058
PRR12	-2.86385	15.1871	0.0117155	-0.113273	-0.0166673	3.37756	3.44253
LRRC8C	-2.86333	15.3454	0.0116335	-0.207909	-0.0306641	3.5268	3.64608
JARID2	-2.86288	13.6346	0.0128028	-0.139555	-0.0198399	2.99419	3.07389
CHMP1A	-2.86231	11.6301	0.0146943	-0.122251	-0.0163634	3.49447	3.56377
PHEX	-2.86217	17.7948	0.0104419	-0.482289	-0.0737794	1.88522	2.16325
NCKIPSD	-2.86203	15.5736	0.0115321	-0.168999	-0.0249905	2.7713	2.8683
TMEM35A	-2.86171	15.6197	0.0115133	-0.322087	-0.0476496	2.33629	2.52116
RNF121	-2.86105	17.9002	0.010423	-0.209395	-0.0320364	2.86454	2.98526
PHLDB1	-2.85997	17.9025	0.0104461	-0.160137	-0.0244715	3.76402	3.85632
MAP3K10	-2.85978	16.5797	0.0110499	-0.120332	-0.0180458	2.892	2.96119
FCGRT	-2.85876	17.6916	0.0105621	-0.219012	-0.0333314	3.66036	3.78653
CDK16	-2.85842	15.5435	0.0116349	-0.115885	-0.0170556	3.67406	3.74053
DHX32	-2.85697	13.9742	0.0126936	-0.10428	-0.0148392	3.1679	3.22746
STK16	-2.85565	14.3197	0.0124784	-0.114073	-0.0163336	2.74511	2.81031
SCD5	-2.85528	17.5352	0.0107088	-0.146033	-0.0220914	3.32672	3.41078
SSR3	-2.85363	16.9302	0.0110227	-0.175638	-0.0262937	3.76983	3.8708
CDC34	-2.85334	14.5666	0.0123664	-0.121661	-0.0174642	3.44847	3.51804
BET1	-2.84693	14.947	0.012276	-0.130986	-0.0188051	2.93033	3.00522
PPP2R1B	-2.84415	17.0385	0.0111937	-0.198625	-0.0294591	3.01976	3.1338
TRPC4AP	-2.84375	12.5682	0.0142192	-0.0993086	-0.0133914	3.75047	3.80682
MSTO1	-2.84345	17.9869	0.0107881	-0.196911	-0.0295663	2.04294	2.15617
DGCR2	-2.84324	15.0127	0.0123258	-0.117976	-0.0168847	3.59423	3.66166
ERCC2	-2.84317	17.6766	0.010927	-0.126663	-0.0189345	3.12096	3.19375
POLR2E	-2.84289	17.456	0.0110311	-0.160994	-0.023986	3.68671	3.7792
PSENEN	-2.8407	13.3615	0.0135918	-0.113439	-0.0155848	2.72523	2.78974
PARP4	-2.8361	16.6303	0.0115861	-0.146967	-0.0214595	3.55325	3.63746
ARHGAP17	-2.83569	10.2488	0.0172807	-0.125811	-0.0152985	3.65577	3.72632
TGFBR1	-2.83559	14.8733	0.0126082	-0.130456	-0.0184464	2.80133	2.87579
TBC1D22A	-2.83553	10.6952	0.0166259	-0.10898	-0.0135435	3.24236	3.30362
DGKQ	-2.83544	16.417	0.0117115	-0.116528	-0.0169438	3.14254	3.20927
GDI1	-2.83522	15.4301	0.0122687	-0.117016	-0.01672	3.60816	3.67503
CTBP1	-2.83445	11.578	0.0155246	-0.092438	-0.011905	3.70402	3.75619
KDM6B	-2.83405	13.1012	0.0139913	-0.160045	-0.0216495	3.40331	3.49415
HDHD5	-2.83241	10.3204	0.0172687	-0.129886	-0.0157783	3.02894	3.10177
AC090673.1	-2.8315	17.9972	0.0110642	-0.741617	-0.109843	0.69702	1.12275
TGFB1	-2.82982	17.6807	0.0112413	-0.181607	-0.0267316	4.24107	4.34523
CFL1	-2.82975	17.9883	0.0111099	-0.154972	-0.0229035	4.50252	4.59145
ZNF827	-2.82789	16.8575	0.0116729	-0.132852	-0.0192784	2.89541	2.97147
BCAP29	-2.82628	17.2762	0.011511	-0.130418	-0.0190077	3.48749	3.5622
CLASP1	-2.82608	12.2983	0.014972	-0.112757	-0.0147314	3.52161	3.58535
ARF3	-2.82342	13.0153	0.0143569	-0.115364	-0.0153549	3.73154	3.7969
PLPP5	-2.82326	17.9891	0.0112653	-0.174074	-0.0255316	2.79562	2.89542
ADPRHL2	-2.82207	13.8521	0.0136913	-0.117997	-0.0160321	2.99113	3.05814
TIAM2	-2.82179	15.7235	0.0124346	-0.24775	-0.0350152	2.3122	2.45358
BLOC1S1	-2.82179	13.2518	0.0141927	-0.158118	-0.0211413	2.31403	2.40366
KIAA1328	-2.8205	14.6844	0.0131246	-0.148416	-0.0205154	2.24647	2.33093
MZT2A	-2.8202	15.1189	0.012845	-0.295206	-0.0411611	3.01453	3.18271
COX4I1	-2.82005	9.27293	0.0194836	-0.11354	-0.0127147	3.82661	3.88973
TRPT1	-2.81968	14.9464	0.0129707	-0.200076	-0.0277807	2.65591	2.76983
POLR2C	-2.81915	12.3673	0.0150969	-0.134594	-0.0174618	3.27293	3.34896
GTF2IP4	-2.81911	15.4099	0.0126912	-0.328498	-0.0460029	2.06257	2.24982
ST8SIA4	-2.81758	17.4106	0.0116624	-0.246375	-0.0356054	2.85749	2.99848
CDC42SE2	-2.81705	14.9832	0.0130153	-0.155537	-0.0215419	3.04338	3.13192
MED8	-2.81705	16.3864	0.0121854	-0.123515	-0.0175575	2.98662	3.05716
PSAP	-2.81659	15.6493	0.012612	-0.116659	-0.0163597	4.7977	4.8642
EFNB2	-2.81654	14.6613	0.0132452	-0.345797	-0.0475369	3.89879	4.09546
SMIM20	-2.81646	15.0462	0.0129898	-0.143057	-0.0198241	2.38205	2.4635
CLN8	-2.81595	13.577	0.0140782	-0.203568	-0.0272492	2.92728	3.04269
SLC38A10	-2.81486	14.4836	0.0134143	-0.108443	-0.0148177	3.76	3.82163
PPP3CA	-2.8146	13.7069	0.0140092	-0.169304	-0.0226993	3.58959	3.6856
LRRC70	-2.81388	17.5091	0.0117087	-0.262044	-0.0377548	2.02312	2.17302
SNX22	-2.81298	17.8611	0.0115725	-0.161145	-0.0233071	1.93773	2.02995
C3orf18	-2.81228	14.2303	0.0136675	-0.213912	-0.0289637	2.10848	2.22992
CPXM1	-2.81134	17.826	0.0116287	-0.294109	-0.0424336	2.54822	2.71649
MTCL1	-2.81034	11.3632	0.0164869	-0.199648	-0.024659	2.93878	3.05093
ELL2	-2.80938	17.9351	0.0116294	-0.21169	-0.0305157	2.75244	2.87354
MMP10	-2.80662	17.4611	0.011913	-0.651897	-0.0930354	2.64133	3.0138
TOR2A	-2.80658	17.6398	0.0118316	-0.144332	-0.0206502	2.72168	2.80418
GEMIN7	-2.80658	13.4866	0.0144131	-0.112301	-0.0148127	2.70247	2.76603
SNX30	-2.80536	12.826	0.015039	-0.127595	-0.0164865	2.98311	3.05515
RNPS1	-2.8036	14.6168	0.0136242	-0.141667	-0.019136	3.43244	3.51284
C19orf70	-2.80288	17.3994	0.0120371	-0.127735	-0.0181297	2.76344	2.83637
ZXDA	-2.80113	12.3109	0.0156752	-0.140512	-0.0177525	2.23222	2.31135
PAOX	-2.8009	15.0534	0.0133998	-0.170317	-0.0231425	2.19144	2.28817
ARHGEF7	-2.80055	11.0628	0.0171729	-0.185162	-0.0222598	3.70568	3.80939
SSR2	-2.79959	16.1144	0.0127871	-0.121044	-0.0167579	3.84761	3.91651
NCAPH2	-2.79933	17.8668	0.0119127	-0.156056	-0.022201	2.73579	2.82492
P4HA2	-2.79922	11.4732	0.0166851	-0.143627	-0.0175393	3.4383	3.51888
MEG9	-2.79921	16.2416	0.0127259	-0.195524	-0.0271166	1.63779	1.74911
LINC02454	-2.79888	17.8987	0.01191	-0.28581	-0.0406557	1.72723	1.89046
FARP1	-2.79885	14.4857	0.0138477	-0.126299	-0.0169048	3.54169	3.6133
AC004540.1	-2.79846	17.9914	0.0118797	-0.237565	-0.0338186	1.97965	2.11534
TGOLN2	-2.79633	14.2177	0.0141157	-0.110434	-0.0146398	4.138	4.20054
SPAG1	-2.79334	16.5817	0.0126959	-0.267353	-0.0370181	2.3263	2.47848
ARL16	-2.79243	12.2408	0.0160074	-0.110446	-0.0137512	2.82447	2.88657
TSPAN31	-2.79177	10.0928	0.0189048	-0.143183	-0.0161646	2.74465	2.82432
AURKAIP1	-2.79084	16.7504	0.012673	-0.125564	-0.0173792	3.28443	3.3559
BRD1	-2.78898	11.6352	0.0168005	-0.124049	-0.0150235	3.18439	3.25393
CDC42EP5	-2.78761	16.57	0.0128549	-0.227109	-0.0312109	3.38584	3.515
C21orf2	-2.78669	17.6881	0.0123208	-0.230127	-0.032146	2.1605	2.29164
ERCC1	-2.78636	12.2356	0.0161955	-0.121395	-0.0149817	3.27413	3.34232
ZCCHC2	-2.78565	12.7342	0.0157034	-0.196345	-0.0246171	3.14391	3.25439
TFRC	-2.78448	15.7692	0.0133959	-0.184374	-0.0248763	3.83071	3.93533
FBXL14	-2.78421	12.4038	0.016082	-0.14716	-0.0182121	2.6141	2.69679
SAMD9L	-2.78415	12.4959	0.0159883	-0.224255	-0.0278377	3.09888	3.22492
MBD6	-2.78247	11.2867	0.0174401	-0.118729	-0.014035	3.50886	3.57525
SMARCC1	-2.7821	17.9529	0.0123204	-0.139217	-0.0194079	3.75419	3.83351
TRABD	-2.78176	14.4959	0.0143199	-0.109643	-0.0143488	3.24589	3.30788
MBD3	-2.78054	16.2124	0.0132441	-0.115559	-0.0156391	3.47177	3.53736
RHPN1	-2.78007	17.0303	0.0128166	-0.195106	-0.026756	3.00109	3.11202
ID2	-2.77983	11.5929	0.017136	-0.386654	-0.0461215	2.01965	2.23604
ADAM23	-2.77721	16.8081	0.0130091	-0.189993	-0.0258653	3.05447	3.1624
RAB5A	-2.77671	10.7372	0.018385	-0.115469	-0.0131849	3.51499	3.57932
FHOD1	-2.77649	16.3996	0.01325	-0.185533	-0.0250594	3.44371	3.54901
RTL8C	-2.77405	15.2866	0.0139908	-0.127943	-0.0168625	3.58673	3.65914
FAM196B	-2.77395	17.9921	0.0125191	-0.351853	-0.0485714	2.49131	2.69152
C1orf198	-2.77322	13.9851	0.0149593	-0.154744	-0.0197658	3.02805	3.1153
PRKACB	-2.77221	17.8613	0.0126256	-0.225978	-0.0310673	3.43088	3.55941
NDUFB7	-2.77207	12.8435	0.0160055	-0.126536	-0.0156153	3.12582	3.19689
COMMD2	-2.77174	14.2909	0.0147627	-0.152483	-0.0195877	2.98403	3.07007
YWHAB	-2.77119	16.4906	0.0133461	-0.145286	-0.0195181	4.05521	4.13761
C1orf159	-2.77027	17.5592	0.0128202	-0.130881	-0.0178686	2.60913	2.6835
NRIP3	-2.77007	17.9914	0.0126237	-0.491448	-0.0675037	2.19018	2.46966
RAD54L2	-2.76898	10.5458	0.0189274	-0.125048	-0.0139661	3.30275	3.37226
TMED1	-2.76549	12.9411	0.0161122	-0.140508	-0.0172287	2.87302	2.95189
ZDHHC7	-2.76532	13.415	0.0156776	-0.128613	-0.0159944	3.40013	3.47244
EIF3FP3	-2.76382	17.9984	0.0127902	-0.285306	-0.0388764	1.16201	1.32411
ZNF544	-2.76368	9.28909	0.0213577	-0.134168	-0.0137029	2.85069	2.92462
STARD3NL	-2.76299	13.9298	0.015308	-0.123226	-0.0154934	3.31916	3.38852
CDK7	-2.76287	17.6324	0.0129876	-0.15985	-0.0216379	2.70126	2.792
CMTM4	-2.76258	14.1902	0.0151114	-0.199258	-0.0252079	2.69962	2.81186
C14orf37	-2.75731	17.9143	0.0130081	-0.354707	-0.0478642	2.11275	2.31404
TNRC6A	-2.75625	13.6204	0.0157735	-0.133009	-0.0164231	3.47614	3.55085
PRPSAP1	-2.75368	14.7371	0.0149638	-0.112334	-0.0142224	3.34663	3.40991
KATNA1	-2.75314	14.5714	0.0151023	-0.141632	-0.0178475	2.66961	2.74935
ZSCAN25	-2.75255	8.5577	0.023438	-0.137131	-0.0128732	2.71964	2.79464
PRKCSH	-2.75203	10.7555	0.0191787	-0.107578	-0.0118209	4.09836	4.15806
FNBP1L	-2.75179	13.3913	0.0161147	-0.151674	-0.0184831	3.63364	3.71872
AC073130.1	-2.74833	17.2054	0.0136086	-0.343014	-0.0452362	1.92901	2.12314
RPLP2	-2.7482	11.1931	0.018682	-0.110765	-0.0123619	4.102	4.16357
DAZAP2	-2.74791	10.8947	0.0191133	-0.126198	-0.013873	3.6945	3.76453
TMED7	-2.74772	17.8418	0.0133111	-0.144098	-0.0191773	3.53992	3.62156
PPME1	-2.74709	12.3872	0.0172608	-0.110919	-0.0129856	3.16026	3.22221
NXPH3	-2.74705	15.7848	0.0144535	-0.508216	-0.0652104	2.00352	2.29023
RARB	-2.74602	15.2399	0.0148399	-0.270316	-0.0342426	3.31406	3.46634
LYPD6	-2.74586	17.9633	0.0133063	-0.254608	-0.0338613	1.8743	2.01854
HMGN4	-2.74438	12.5629	0.0171602	-0.121901	-0.014302	2.86886	2.93696
MRPL41	-2.74385	16.043	0.014389	-0.153906	-0.0197602	3.04366	3.1305
LASP1	-2.74074	17.2714	0.0137933	-0.124434	-0.0162587	4.14909	4.21944
LRRC45	-2.74055	14.4913	0.0155464	-0.116384	-0.0143751	2.80458	2.86996
PIGA	-2.74033	13.7507	0.0161557	-0.135678	-0.0164265	2.45218	2.52823
TMEM64	-2.7389	15.6837	0.0147608	-0.153607	-0.0194451	3.04699	3.13351
AC107021.2	-2.73869	15.4089	0.0149472	-0.393388	-0.0494972	1.17086	1.3923
TMEM50A	-2.73773	15.3021	0.0150481	-0.124112	-0.0155587	3.60194	3.67177
XKR8	-2.73722	17.9947	0.0135387	-0.144926	-0.0190588	2.74294	2.82494
MTPN	-2.73396	14.516	0.0157325	-0.124635	-0.0152557	4.03604	4.10599
MRGBP	-2.73342	13.5728	0.0165315	-0.103705	-0.0123626	3.05392	3.11195
SUSD1	-2.73189	14.8399	0.0155542	-0.164976	-0.0202919	3.19185	3.28448
RPL7A	-2.7313	11.812	0.0184498	-0.12647	-0.01412	3.98884	4.05914
CIRBP	-2.73108	17.5967	0.0139107	-0.218105	-0.0282678	3.42126	3.54444
NES	-2.73102	15.8266	0.0149087	-0.185725	-0.023316	4.15825	4.26277
PREP	-2.7305	13.792	0.0164324	-0.108978	-0.0130164	3.24995	3.31095
SLC25A43	-2.73028	9.86556	0.0214291	-0.125011	-0.0125455	2.84054	2.90931
SERTAD3	-2.72904	9.05583	0.0231342	-0.241026	-0.0226579	2.85267	2.98451
DOCK1	-2.72834	14.7401	0.0157388	-0.116395	-0.0142078	3.86738	3.93268
ARIH2	-2.72768	17.0947	0.0142711	-0.120011	-0.0153532	3.30732	3.375
NF2	-2.7276	17.9847	0.0138238	-0.19279	-0.0250159	3.43784	3.54674
RPL15	-2.72698	14.7367	0.0157841	-0.139959	-0.0170484	4.19562	4.27412
RDX	-2.72604	10.6426	0.0202566	-0.159548	-0.0166788	3.89916	3.98728
AR	-2.72575	14.5376	0.0159742	-0.23226	-0.0281009	2.87638	3.00657
PPP1R15A	-2.72527	12.0702	0.0183439	-0.183429	-0.0204977	3.35931	3.46127
RAB11FIP1	-2.72477	13.6168	0.0167718	-0.3755	-0.0442341	2.31841	2.52828
ACSL1	-2.72357	16.2685	0.0148637	-0.157625	-0.0197495	2.91435	3.00304
C11orf49	-2.72322	14.9549	0.0157421	-0.117536	-0.0143121	2.86552	2.93145
ZC3H7B	-2.72315	14.1141	0.0163959	-0.141039	-0.0168097	3.7965	3.87543
DIS3	-2.72119	16.2674	0.0149376	-0.113505	-0.0141724	3.39272	3.45656
ZNF669	-2.71969	13.3008	0.0172301	-0.177222	-0.0205128	2.37486	2.47373
MT1E	-2.71969	16.4259	0.0148895	-0.365268	-0.045647	2.05823	2.26368
ZNF579	-2.71833	11.8295	0.0188733	-0.13183	-0.0144197	3.02398	3.0971
COG6	-2.71715	16.033	0.0152066	-0.121384	-0.0149976	3.08339	3.15158
CLCN4	-2.71687	13.3382	0.0172884	-0.189068	-0.0218132	2.89208	2.99752
ZNF138	-2.71683	17.131	0.0145796	-0.170897	-0.0215416	2.00771	2.10393
PFN2	-2.71605	17.4124	0.0144544	-0.159814	-0.0202181	3.44117	3.53118
PSMD9	-2.71553	15.5898	0.0155433	-0.129888	-0.0158626	2.41875	2.49162
KIAA0895L	-2.71533	17.9461	0.0142081	-0.132172	-0.0168472	2.86659	2.9411
TSC22D4	-2.71371	12.3626	0.0184028	-0.118171	-0.0131093	3.72334	3.78898
ATP5S	-2.71252	17.5931	0.0144691	-0.195349	-0.0246617	2.24347	2.35347
KNOP1	-2.71082	16.8852	0.0148998	-0.152006	-0.0189123	2.93858	3.02403
HSDL1	-2.70934	9.6144	0.0226968	-0.126976	-0.0120323	3.0892	3.1587
TSPAN17	-2.70893	16.7099	0.0150581	-0.124454	-0.0153922	3.40108	3.471
NT5C2	-2.7086	10.8414	0.0205796	-0.133621	-0.0136974	3.09991	3.17357
ZMYND19	-2.70773	17.1152	0.0148688	-0.1201	-0.0149361	2.8696	2.93712
MRPL23	-2.70685	14.4551	0.0166507	-0.320911	-0.0376445	1.54718	1.72646
ACBD6	-2.70685	14.631	0.0165124	-0.130695	-0.0154014	3.07138	3.14443
ANKRD50	-2.70612	17.8933	0.0145148	-0.175165	-0.0220162	3.59697	3.69556
TMEM222	-2.70525	14.3878	0.0167575	-0.123464	-0.0144212	3.01013	3.07907
CEP170	-2.70471	17.9155	0.0145473	-0.16897	-0.0212015	3.53665	3.63173
SESTD1	-2.70314	12.2923	0.0188512	-0.195805	-0.0212847	3.3556	3.46414
GALNT18	-2.70246	17.9065	0.0146214	-0.588032	-0.073532	1.81899	2.14977
PCBP4	-2.70149	16.9315	0.0151661	-0.223075	-0.0273991	2.90768	3.03292
RAB6A	-2.70035	9.94675	0.0223986	-0.0954936	-0.00911522	3.68004	3.73235
PHB2	-2.6995	9.82012	0.0226714	-0.114935	-0.0108528	3.80918	3.87208
SH3GLB2	-2.69872	11.8024	0.0196011	-0.127804	-0.0135055	3.25194	3.32259
RAB1B	-2.69798	12.4323	0.0188738	-0.106532	-0.0115437	3.8418	3.90084
MTMR9	-2.6974	13.0337	0.0182501	-0.137671	-0.0152375	3.09545	3.17191
USP13	-2.69725	18	0.0147376	-0.191486	-0.0237982	2.81574	2.92338
GPX1P1	-2.69584	14.6208	0.0168859	-0.494968	-0.0573182	0.829927	1.10607
PTPN1	-2.69515	17.9955	0.0148054	-0.160954	-0.0199408	3.46903	3.55947
ITGB1	-2.69412	14.0921	0.0173772	-0.144802	-0.0164823	4.59065	4.67129
GANAB	-2.69348	13.7366	0.0177117	-0.100846	-0.0113471	4.30113	4.35723
FAM45A	-2.6919	10.9987	0.0209598	-0.102413	-0.0102747	2.57461	2.63095
TLE4	-2.69122	14.8881	0.0168351	-0.152685	-0.0176729	3.02046	3.10564
BTG3	-2.68804	17.9035	0.0150767	-0.221784	-0.027148	2.70311	2.82758
RYK	-2.68788	10.5299	0.0218511	-0.106287	-0.010298	3.38417	3.44247
NOP53	-2.68737	17.9171	0.0150913	-0.140448	-0.0171783	3.84323	3.92204
EOGT	-2.68359	17.9952	0.0151732	-0.154667	-0.0188343	3.54569	3.63244
INTS1	-2.68259	17.2115	0.0156178	-0.106699	-0.0128015	3.78806	3.84781
CD200	-2.68031	15.9414	0.016459	-0.452132	-0.0527176	2.57193	2.82435
RHPN2	-2.6799	16.2912	0.0162482	-0.304081	-0.0356949	1.95133	2.12121
GK5	-2.67979	15.2986	0.016919	-0.15465	-0.0177552	2.42509	2.5113
NEDD8	-2.67889	10.4719	0.0222959	-0.129156	-0.0122541	3.11087	3.18157
FBXO18	-2.67859	12.053	0.0200237	-0.123447	-0.0127312	3.64358	3.71167
HPS6	-2.67858	10.4777	0.0222982	-0.110701	-0.0105006	3.02787	3.08847
ZNF462	-2.67797	15.0088	0.017195	-0.153935	-0.0174963	2.9003	2.98601
CRKL	-2.67743	12.1183	0.0199867	-0.109149	-0.0112653	3.58219	3.64239
MRPS17	-2.67727	11.8023	0.0203892	-0.129987	-0.0132231	2.17301	2.24462
PEX14	-2.67602	9.88776	0.0234649	-0.125389	-0.0113556	2.87631	2.94468
RBM38	-2.67535	16.8024	0.0160901	-0.144986	-0.0170711	3.14211	3.22314
AL138756.1	-2.67488	13.4387	0.0186451	-0.173599	-0.0187569	2.12067	2.21685
Z99289.1	-2.67421	17.9099	0.0155211	-0.370559	-0.0444225	0.872687	1.08018
FAM124B	-2.67216	17.0404	0.0160588	-0.20405	-0.0240138	3.61609	3.73012
KIF1BP	-2.67067	15.7254	0.0169315	-0.123755	-0.0141412	3.21831	3.28726
ZDHHC14	-2.66947	15.4144	0.0171907	-0.121101	-0.0137113	3.01094	3.07835
PCDHGA4	-2.66941	17.904	0.0156827	-0.280438	-0.033367	2.36957	2.52647
NCK2	-2.66838	12.0494	0.0204102	-0.110128	-0.0111477	3.33751	3.39815
TCTN2	-2.66821	17.6214	0.0158705	-0.17037	-0.020136	2.62483	2.72008
TMEM258	-2.66767	11.2934	0.0214497	-0.0995927	-0.00970256	3.06692	3.12157
TBC1D24	-2.66732	13.877	0.0185064	-0.115181	-0.01246	2.89661	2.96043
SLC35E2B	-2.66612	15.4368	0.0172913	-0.0933335	-0.0105151	3.31558	3.36751
ENC1	-2.66562	17.9987	0.0157602	-0.260471	-0.0308576	3.31198	3.45764
ABHD17A	-2.66192	11.8838	0.0208663	-0.232358	-0.0230645	2.78376	2.91147
DDX42	-2.66171	11.6698	0.0211563	-0.105369	-0.0103478	3.63457	3.69243
FAM213A	-2.66045	17.7046	0.0160872	-0.143375	-0.0167639	4.25306	4.33313
FBXW8	-2.66033	15.4299	0.0174997	-0.235927	-0.0263222	2.88431	3.01544
ZNF791	-2.65981	12.1297	0.0206366	-0.112762	-0.0112756	2.9501	3.01212
CACTIN	-2.65909	15.6898	0.0173592	-0.109139	-0.0122269	3.17625	3.23693
SMO	-2.65839	16.0001	0.0171725	-0.167344	-0.0188588	2.96787	3.06097
RABL6	-2.65742	14.0834	0.0186808	-0.111431	-0.0119259	3.60879	3.67047
ARMC5	-2.65741	17.6477	0.0162208	-0.15129	-0.0175865	3.01896	3.1034
PLEKHG2	-2.65435	17.9217	0.0161803	-0.142173	-0.0165245	3.43659	3.51594
FIGN	-2.65151	17.9977	0.0162382	-0.137336	-0.0159103	2.22955	2.30617
SBNO2	-2.6503	17.1399	0.0167487	-0.127344	-0.0144983	3.5031	3.57402
ANKMY1	-2.6498	13.07	0.0199452	-0.187455	-0.0191238	2.23571	2.339
PPP1CA	-2.64831	16.2196	0.017384	-0.123407	-0.0137426	3.65083	3.71941
DIP2A	-2.64768	10.022	0.0243678	-0.100703	-0.00867988	3.37965	3.43434
UBE2Z	-2.64711	13.3392	0.0197695	-0.110454	-0.0113242	3.68145	3.74234
RPL4	-2.64541	10.8599	0.0229934	-0.112849	-0.0102605	4.28611	4.34767
IAH1	-2.64434	16.139	0.0175788	-0.138293	-0.0152708	2.65178	2.72856
JMJD6	-2.64384	15.4869	0.0180497	-0.206739	-0.0224628	2.89898	3.01358
ALKBH5	-2.64179	14.7871	0.0186614	-0.10807	-0.0114874	3.57958	3.63936
DIAPH2	-2.63984	10.0268	0.0246889	-0.327314	-0.027741	3.12351	3.30104
RNF220	-2.63918	11.154	0.0227894	-0.130488	-0.0119225	3.1263	3.1975
BEX3	-2.63686	15.0912	0.0186041	-0.129738	-0.0137851	3.60933	3.68109
C5orf22	-2.6356	11.0737	0.0230595	-0.193837	-0.0174963	2.94416	3.04983
OCIAD2	-2.6346	15.0664	0.0187073	-0.206012	-0.0217879	2.87264	2.98654
TAF7	-2.63362	10.7001	0.0237427	-0.102999	-0.00904219	3.47667	3.53269
USP42	-2.63268	11.5061	0.0225381	-0.100023	-0.00919867	2.9962	3.05081
LSM7	-2.63181	17.0325	0.0174694	-0.133371	-0.0146921	2.96975	3.04378
DUSP8	-2.6314	14.2852	0.0194759	-0.227713	-0.0234109	2.31791	2.44348
TEF	-2.63073	17.1457	0.0174415	-0.273335	-0.0301228	2.12802	2.27975
DDX52	-2.63064	16.2476	0.0180056	-0.12223	-0.0132158	3.34128	3.409
CYB5R4	-2.63056	16.652	0.0177478	-0.174832	-0.0190682	2.64257	2.73952
MTUS1	-2.62983	16.1038	0.0181318	-0.229503	-0.0246983	4.17327	4.30037
NUP58	-2.629	17.7618	0.0171552	-0.125484	-0.0139502	3.2651	3.33482
PRR14L	-2.6287	14.2144	0.0196419	-0.105426	-0.0107614	3.37725	3.43534
FAM117B	-2.62815	16.8376	0.0177207	-0.176469	-0.0192417	2.58882	2.68668
IGFBP2	-2.62793	12.8314	0.0210556	-0.151691	-0.0147117	3.67303	3.75623
GPATCH2L	-2.62696	12.1568	0.021898	-0.139021	-0.0130624	3.29441	3.37045
LRSAM1	-2.62676	11.8355	0.0223251	-0.11266	-0.0104153	3.00733	3.06887
TMEM250	-2.62664	9.8649	0.025576	-0.104483	-0.00848005	3.49744	3.55393
RPS6KA1	-2.62662	13.0046	0.0209163	-0.134681	-0.0131203	2.66373	2.73763
DKK1	-2.62589	16.5262	0.0179995	-0.376572	-0.04063	2.85588	3.06448
FREM1	-2.62514	17.9923	0.0171704	-0.285649	-0.0316801	0.977499	1.13616
CHD6	-2.62392	17.7244	0.0173598	-0.135908	-0.0149689	3.38162	3.45706
CENPJ	-2.6236	14.1169	0.0199274	-0.214938	-0.0216655	2.43044	2.54874
EXOSC6	-2.62298	14.7233	0.0194242	-0.167765	-0.0172084	3.01737	3.10986
DGCR11	-2.62295	15.1871	0.0190537	-0.180525	-0.0187581	1.88615	1.98579
HES6	-2.62135	17.5832	0.0175323	-0.208963	-0.0228536	1.91497	2.03087
MBD2	-2.62116	15.0891	0.0191986	-0.113688	-0.0117434	3.4645	3.52722
BVES	-2.62086	13.1504	0.0209887	-0.150255	-0.014558	2.5891	2.67151
VPS53	-2.61947	12.3766	0.02193	-0.121382	-0.01135	3.26539	3.33175
RBM15	-2.61865	14.8964	0.0194494	-0.0926643	-0.00947647	2.7078	2.75887
ITPKC	-2.61479	14.1652	0.0202294	-0.141826	-0.014082	3.0958	3.17376
C19orf47	-2.61392	16.6885	0.0183433	-0.127027	-0.0134667	2.68386	2.75411
ANKRD1	-2.61339	17.0475	0.0181406	-0.364847	-0.0389372	3.75021	3.9521
NCOR1	-2.61309	12.4717	0.0220764	-0.127176	-0.0117897	3.82125	3.89074
NEIL2	-2.61267	17.6662	0.0178067	-0.131052	-0.0141404	2.4788	2.5514
EIF4H	-2.61245	13.1726	0.0213043	-0.11202	-0.0106844	3.77856	3.83992
GLI4	-2.61214	17.9943	0.0176461	-0.13904	-0.0150798	2.28603	2.36309
TUBB6	-2.61146	17.9896	0.0176737	-0.16473	-0.0178436	3.98997	4.08126
SMIM26	-2.61139	9.26534	0.027563	-0.140549	-0.0103762	2.60466	2.68013
MTSS1L	-2.60834	17.9821	0.0177942	-0.144638	-0.0155795	3.38691	3.46702
CNOT2	-2.60532	11.1329	0.0242497	-0.109112	-0.00925802	3.39135	3.45053
ZNF222	-2.60324	13.9258	0.0209159	-0.168153	-0.0161946	1.92434	2.01651
INO80C	-2.60277	10.8639	0.0247949	-0.145707	-0.0120763	2.8023	2.88119
ARPC4	-2.60273	11.9987	0.023111	-0.130687	-0.0115856	3.41981	3.49095
USP48	-2.60252	16.9787	0.0185961	-0.126772	-0.0132488	3.61927	3.68928
CFAP54	-2.6025	17.0837	0.0185325	-0.289962	-0.0303696	2.71216	2.87233
S1PR3	-2.60056	15.694	0.0195395	-0.272886	-0.027572	3.08131	3.23154
MSL3	-2.59856	14.2264	0.0208253	-0.15045	-0.0145039	3.25663	3.33911
DALRD3	-2.5981	14.0285	0.021028	-0.142251	-0.0136095	2.80656	2.88449
ZNF316	-2.59809	11.6818	0.0237455	-0.12978	-0.0111963	3.23961	3.3101
CBX4	-2.59769	9.31464	0.0280812	-0.167953	-0.0120251	2.85005	2.94004
TMTC4	-2.59767	14.8524	0.0203141	-0.161783	-0.01588	3.08845	3.17728
CHAC1	-2.59726	14.7065	0.0204539	-0.21156	-0.0206577	2.29005	2.40615
SMPD4	-2.59717	17.9849	0.0182157	-0.138184	-0.0145918	3.2705	3.34688
ZNF670	-2.59522	12.2652	0.023085	-0.210483	-0.0186092	2.15762	2.27216
CHMP4B	-2.59229	14.8956	0.020496	-0.114266	-0.011113	3.67581	3.7385
RFNG	-2.59201	14.5244	0.0208253	-0.107954	-0.0103733	3.1987	3.25786
DEPDC5	-2.59171	16.0455	0.0196366	-0.10423	-0.0104492	2.68464	2.74198
ZNF776	-2.59089	17.6519	0.018645	-0.160417	-0.0166402	2.74019	2.82872
ODF3B	-2.5901	17.9439	0.018511	-0.388135	-0.0404313	1.54142	1.7557
DNAL1	-2.58967	14.2689	0.0211513	-0.170382	-0.0161594	2.60146	2.69473
HTR1B	-2.58894	15.7592	0.0199547	-0.351241	-0.0347701	2.62632	2.81933
PHKG2	-2.58882	17.4012	0.0188724	-0.117209	-0.0120507	2.56803	2.63266
ENG	-2.58818	17.9254	0.0185957	-0.298976	-0.0310236	4.51427	4.67927
SHF	-2.58782	17.6533	0.0187642	-0.282651	-0.0291545	2.40042	2.55633
XPA	-2.58731	13.4381	0.0220653	-0.144519	-0.0132332	2.37862	2.45749
INPP5D	-2.58725	13.8117	0.0216876	-0.143656	-0.0133411	3.57153	3.65003
UQCR11	-2.58559	11.3566	0.0247736	-0.110368	-0.00907776	3.00763	3.06735
TMEM254	-2.58427	17.675	0.018891	-0.177111	-0.0181563	2.27987	2.37751
FAT4	-2.58425	11.752	0.0242526	-0.217362	-0.0182494	3.46684	3.58465
EIF5A2	-2.58357	17.1896	0.0192076	-0.239474	-0.0242721	2.3067	2.43857
FAM129B	-2.58336	16.5184	0.0196459	-0.121437	-0.0121194	4.26513	4.33191
RAD51D	-2.58165	12.0711	0.0239288	-0.142633	-0.0121161	2.70684	2.78421
OPN3	-2.58165	15.5955	0.0203737	-0.132157	-0.0128412	2.88704	2.95954
MAP4K5	-2.58154	12.2872	0.0236506	-0.10502	-0.00901973	3.48818	3.5452
PLIN3	-2.58128	17.6035	0.0190509	-0.130341	-0.0132678	3.47271	3.54452
SNX11	-2.58102	15.6691	0.0203438	-0.139062	-0.0135223	2.76472	2.84101
TRAF1	-2.58029	16.0914	0.0200646	-0.27309	-0.0268118	1.67956	1.82951
NCSTN	-2.5795	12.6611	0.0232749	-0.127087	-0.0110661	3.72878	3.79786
E2F1	-2.5794	15.1743	0.0207968	-0.303405	-0.0290009	2.46275	2.62895
EWSR1	-2.57851	17.3127	0.0193346	-0.12984	-0.0130686	3.714	3.78545
AC008038.1	-2.57817	17.9965	0.0189504	-0.127402	-0.0129935	2.11873	2.18893
VEPH1	-2.57816	17.7959	0.019064	-0.150706	-0.0153097	3.53185	3.61486
GLRX3P2	-2.57648	16.7664	0.0197603	-0.311171	-0.0308229	1.03924	1.21024
LINC00641	-2.57467	17.3077	0.0194923	-0.277332	-0.0277062	2.22795	2.38047
EVI2B	-2.57375	15.5383	0.0207441	-0.468117	-0.0447029	1.44315	1.69956
PMM1	-2.57224	16.3852	0.0201891	-0.196838	-0.0191618	1.98915	2.09715
PHF12	-2.57154	11.4014	0.0253407	-0.0981709	-0.00783149	3.21863	3.27163
PRDM1	-2.57121	11.1222	0.0257943	-0.628159	-0.0491511	1.86392	2.20258
MPLKIP	-2.57089	10.3296	0.0271984	-0.1128	-0.00829858	2.86285	2.9234
KLC2	-2.57011	13.4406	0.0228021	-0.105245	-0.00928986	3.22755	3.28482
CTDSPL2	-2.56997	15.7106	0.02077	-0.12758	-0.0121487	3.09169	3.16156
BICD2	-2.56963	16.4899	0.020225	-0.12347	-0.0119883	3.43496	3.50269
RPS6KB1	-2.56952	16.0613	0.02053	-0.111617	-0.0107188	3.03669	3.09786
TGDS	-2.56794	14.14	0.0221912	-0.15069	-0.0135999	2.27148	2.35363
LRRC29	-2.56468	17.3862	0.0198521	-0.339314	-0.0333017	1.65254	1.83885
RPL13	-2.56287	12.4854	0.0242309	-0.107373	-0.00892628	4.25734	4.31549
ARSJ	-2.56138	16.9487	0.0202632	-0.246216	-0.0237736	3.11418	3.24917
FAH	-2.56112	13.8938	0.0227293	-0.301868	-0.0265987	2.10316	2.2674
REPIN1	-2.56044	11.358	0.0259211	-0.121487	-0.00940327	3.72622	3.79166
RILPL1	-2.56022	13.2562	0.0234393	-0.14791	-0.0126727	2.98208	3.06237
RBM3	-2.55905	13.7778	0.0229376	-0.513905	-0.0448727	3.51262	3.79201
C12orf65	-2.55857	12.4842	0.0244277	-0.137441	-0.0113106	2.41914	2.49351
AP000695.2	-2.55819	16.2651	0.0208602	-0.210189	-0.0198303	2.54334	2.65835
NDUFA1	-2.5575	16.1214	0.0209926	-0.117464	-0.0110249	3.06444	3.12868
ZSCAN21	-2.55456	17.203	0.0203868	-0.152601	-0.0146184	2.45861	2.54222
OSBPL2	-2.55429	10.0916	0.0284648	-0.12091	-0.00831982	3.14769	3.21231
VPS25	-2.55302	10.2801	0.0281524	-0.13757	-0.00960029	2.84159	2.91517
PGAP3	-2.55291	14.6969	0.0223337	-0.161541	-0.0143902	2.40074	2.4887
KIAA0930	-2.55122	12.5225	0.0247165	-0.136986	-0.0110994	3.42752	3.50156
SERF2	-2.55042	10.0623	0.0287147	-0.0919737	-0.00624142	3.98195	4.03105
BPGM	-2.5499	16.1935	0.021266	-0.337761	-0.0312637	2.95115	3.13566
ATP7B	-2.54933	16.203	0.0212837	-0.13143	-0.0121539	2.88639	2.95818
HEMK1	-2.54786	16.6716	0.0210195	-0.108519	-0.0101252	2.61398	2.6733
TMEM216	-2.54677	16.7825	0.0209917	-0.158234	-0.0147704	2.33154	2.41804
C2orf68	-2.54673	16.5523	0.0211499	-0.150881	-0.0140026	2.8935	2.97594
CAP1	-2.54638	17.9403	0.0202869	-0.168713	-0.0161517	3.94448	4.03692
KCNMB4	-2.54624	17.8273	0.0203586	-0.504188	-0.0481411	2.37933	2.65549
CBX8	-2.54565	11.1522	0.0269518	-0.196682	-0.0144444	2.04729	2.15286
RSAD2	-2.54537	17.8381	0.0203893	-0.485314	-0.0462672	1.07277	1.33856
CCDC149	-2.54537	13.2836	0.0240813	-0.17941	-0.0148716	2.86233	2.95947
EMD	-2.54483	15.3493	0.0221349	-0.118973	-0.010634	3.26282	3.32763
SLC7A6OS	-2.54477	13.5189	0.0238507	-0.120247	-0.0100567	2.76159	2.82674
WDR27	-2.54197	12.8423	0.0247507	-0.165697	-0.0133436	2.89589	2.98541
ELOB	-2.54169	14.2756	0.0232234	-0.102257	-0.00875209	3.35987	3.41538
ANAPC5	-2.5414	11.9268	0.025975	-0.100258	-0.0076674	3.56079	3.61475
UGDH	-2.54042	17.9689	0.0205243	-0.158162	-0.014967	3.16682	3.25338
RNF126	-2.54037	17.7829	0.0206356	-0.122997	-0.0115923	3.19919	3.26649
BICRA	-2.53988	11.0303	0.0274348	-0.0894568	-0.00640956	3.08627	3.13421
CTSO	-2.5397	17.6593	0.0207386	-0.195107	-0.0183137	2.68963	2.79634
PQLC1	-2.53831	13.3731	0.0243076	-0.133947	-0.0109625	3.20155	3.27401
AIG1	-2.53824	9.97476	0.029505	-0.149332	-0.00968997	2.59026	2.66977
MRM2	-2.5382	14.0105	0.0236419	-0.116996	-0.00983272	2.74582	2.80923
MRPS34	-2.53781	14.8265	0.0228924	-0.0994847	-0.00860761	3.24008	3.29412
C10orf25	-2.53693	17.5784	0.0209075	-0.16637	-0.0154987	2.15628	2.24721
ACAD10	-2.53595	17.9872	0.0207059	-0.160388	-0.0150434	2.50792	2.59563
PRPF40B	-2.53555	14.7589	0.0230545	-0.189815	-0.0163015	2.21902	2.32207
PAPD7	-2.53471	10.1477	0.0293254	-0.146787	-0.00959248	3.14312	3.22131
SPTY2D1	-2.53413	10.8087	0.0281008	-0.135883	-0.00941405	3.12552	3.19817
ADO	-2.534	10.4928	0.0286849	-0.143014	-0.00963763	3.082	3.15832
MLLT11	-2.53363	15.8569	0.0222317	-0.228457	-0.0202278	3.38373	3.50807
APBB1	-2.53262	11.8705	0.0264772	-0.118177	-0.00880339	3.38709	3.45058
PDGFC	-2.53034	17.1595	0.0214595	-0.28605	-0.0260243	2.52929	2.68533
SMARCA4	-2.53025	17.998	0.0209473	-0.112161	-0.0103973	3.91548	3.97676
C19orf25	-2.52969	15.7704	0.0224756	-0.141498	-0.0123876	2.80317	2.88011
FEN1	-2.52903	17.4013	0.0213629	-0.290282	-0.0264857	2.71405	2.87244
UBE2D2	-2.52876	11.5197	0.02719	-0.101755	-0.00732964	3.5935	3.64804
CLEC16A	-2.52868	10.5996	0.0287528	-0.122714	-0.00822015	3.224	3.28947
FBXW9	-2.52839	17.0118	0.0216428	-0.134881	-0.0121757	2.5294	2.60293
MCM3AP	-2.52752	16.6528	0.0219247	-0.11594	-0.0103517	3.54025	3.60339
SPHK2	-2.52684	15.7008	0.0226592	-0.158078	-0.0137221	2.88462	2.97052
TPRG1L	-2.52667	13.5191	0.0246918	-0.112923	-0.00904386	3.62472	3.6857
TPD52L2	-2.52499	13.6244	0.0246572	-0.116377	-0.00932551	3.8029	3.86575
PRRC2A	-2.52459	17.5119	0.0214902	-0.121145	-0.0109761	4.14557	4.21164
RPL3P7	-2.5234	15.0772	0.0233313	-0.290663	-0.0245392	1.07715	1.23475
NMRAL1	-2.52318	13.6274	0.0247396	-0.139715	-0.0111474	2.85203	2.92746
RCC1L	-2.52267	15.4957	0.0230143	-0.123612	-0.0105614	3.2225	3.28958
SPATS2	-2.52236	15.4434	0.0230711	-0.133923	-0.0114154	3.30476	3.37743
RIC8A	-2.52196	14.4995	0.0239192	-0.106071	-0.00874293	3.57661	3.63401
PLEKHA8P1	-2.5219	15.9028	0.0227268	-0.219296	-0.0189379	2.01329	2.13241
SMARCA5	-2.52093	11.9679	0.0269091	-0.106541	-0.00773985	3.85365	3.91079
NUDT3	-2.51885	17.5856	0.021701	-0.184657	-0.0165502	3.26134	3.36195
SNRPN	-2.51815	10.3835	0.0297017	-0.107955	-0.00686505	2.92273	2.98014
ZFP64	-2.51808	13.4575	0.0251695	-0.131284	-0.0102629	2.97973	3.0505
LATS2	-2.5155	17.4127	0.0219607	-0.118905	-0.0105356	3.7175	3.78222
MAPK12	-2.51377	15.4959	0.0234266	-0.144288	-0.012075	3.3251	3.40329
TELO2	-2.51244	14.4626	0.0244043	-0.0815951	-0.00656277	3.13792	3.182
KLHL26	-2.51233	9.52129	0.0318672	-0.154429	-0.00873202	2.5134	2.59498
KATNAL1	-2.51207	11.474	0.0280954	-0.15323	-0.0104976	3.11996	3.20183
BAD	-2.51191	11.6971	0.0277582	-0.106347	-0.0073998	3.11801	3.17488
LRMDA	-2.51189	16.6646	0.0226263	-0.302595	-0.0260946	2.28926	2.45361
NELFB	-2.51136	14.1619	0.0247495	-0.0838693	-0.00664767	3.49701	3.54227
TMEM185A	-2.51123	12.1873	0.0270817	-0.211286	-0.0151545	2.41301	2.52623
ERF	-2.50974	9.13835	0.0329588	-0.198159	-0.0105091	3.52733	3.63166
AMOT	-2.5095	17.5486	0.0221482	-0.12526	-0.010986	2.80829	2.87641
MAGEE1	-2.50879	17.2903	0.0223462	-0.177881	-0.0154789	2.05398	2.15066
SOX12	-2.50736	13.8517	0.0252614	-0.128391	-0.00994223	3.53453	3.6037
AC073896.4	-2.50668	11.754	0.0279374	-0.135043	-0.00929355	2.12842	2.20059
SLC35F2	-2.50542	13.2456	0.0260269	-0.165318	-0.0123808	3.40638	3.49523
RBM4	-2.50518	12.6465	0.0267712	-0.182771	-0.0132494	2.10965	2.20766
ABLIM1	-2.50381	16.0135	0.0234828	-0.264565	-0.0219759	4.12717	4.27044
TM2D2	-2.50194	17.9908	0.0222236	-0.12881	-0.0112201	3.37103	3.44105
PTP4A2	-2.5019	14.8476	0.024551	-0.127445	-0.0101331	3.67096	3.73975
USP22	-2.50126	14.2007	0.0252004	-0.122918	-0.00951197	4.16995	4.23617
PAFAH1B2	-2.50102	14.2538	0.0251589	-0.120211	-0.00931743	3.71879	3.78355
ATXN2	-2.49958	12.6854	0.0270026	-0.0866311	-0.00619747	3.30105	3.34746
NUDT16L1	-2.49703	11.7536	0.0284333	-0.121549	-0.00813137	2.76335	2.82819
ABCA9	-2.49605	16.1722	0.0237308	-0.510684	-0.0418336	2.35145	2.6277
UAP1	-2.49533	16.6281	0.0234283	-0.194573	-0.0161238	3.21413	3.31948
SLC30A9	-2.49508	14.0537	0.0256545	-0.132633	-0.0100368	3.333	3.40434
IRF2BP1	-2.49452	12.1393	0.0279976	-0.108319	-0.00738599	3.11017	3.16803
DOT1L	-2.4945	16.2891	0.0237165	-0.127323	-0.0104272	3.3044	3.37327
MAP3K13	-2.49433	14.6391	0.0251135	-0.173817	-0.0134499	2.63955	2.73318
ERO1A	-2.49355	14.8402	0.0249648	-0.127008	-0.00988443	3.57382	3.64226
THOC6	-2.49333	17.9465	0.0226518	-0.122137	-0.0104191	2.69008	2.75636
SNF8	-2.49252	17.5611	0.0229303	-0.122786	-0.0103585	3.27358	3.34015
PPIF	-2.49228	17.3217	0.023097	-0.165485	-0.0138691	2.97162	3.0613
PPP1R14B	-2.49219	17.113	0.0232406	-0.145837	-0.0121537	3.58872	3.66772
UBL5	-2.49213	17.4241	0.0230373	-0.127468	-0.0107069	3.28012	3.34921
LYSMD3	-2.49073	10.8518	0.0302612	-0.120408	-0.00733606	3.18981	3.25368
SHARPIN	-2.49041	11.2712	0.0295482	-0.103718	-0.00655009	3.20219	3.25733
MED17	-2.49034	11.5182	0.0291488	-0.137632	-0.00886438	2.09791	2.17115
C11orf24	-2.48992	17.5742	0.0230454	-0.135378	-0.0113543	2.89504	2.96841
ALG13	-2.48801	14.905	0.0251787	-0.109825	-0.00844664	2.74961	2.80874
CLCF1	-2.48719	17.9074	0.022966	-0.196527	-0.0165094	2.1603	2.26682
HNRNPAB	-2.48707	17.9211	0.0229633	-0.14479	-0.0121637	3.81922	3.89769
PKD1L1	-2.48696	15.7095	0.0245356	-0.274973	-0.0217032	2.62674	2.77508
BCL7A	-2.4865	14.044	0.0260935	-0.140346	-0.0103757	2.84472	2.92008
CASP4	-2.48647	10.598	0.030964	-0.100591	-0.00589396	3.23472	3.28796
SNAPC2	-2.48642	13.1402	0.0271077	-0.128257	-0.00906861	2.98576	3.05442
HOMER1	-2.48602	17.2429	0.0234485	-0.163151	-0.0134421	2.40207	2.49037
TCF12	-2.48575	10.9192	0.0304069	-0.112223	-0.00676821	3.71325	3.77275
TMEM128	-2.48568	11.3232	0.0297129	-0.145725	-0.00910469	2.34812	2.42553
AASS	-2.4855	17.5243	0.0232885	-0.157619	-0.0130642	2.82134	2.90668
NR5A2	-2.48482	17.1832	0.0235464	-0.705314	-0.0578505	1.77942	2.16101
SMIM12	-2.48259	15.4519	0.0249658	-0.16562	-0.0128135	3.19621	3.28543
BRIP1	-2.48164	17.4415	0.0235286	-0.339744	-0.0278379	2.09522	2.27901
ETFBKMT	-2.48066	17.1631	0.0237615	-0.120922	-0.00981222	1.82185	1.88722
MAPRE1	-2.48064	17.9289	0.0232667	-0.132352	-0.0109506	3.65369	3.72534
PHF13	-2.48062	10.0966	0.0322996	-0.127243	-0.00690493	3.08334	3.15041
OAZ1	-2.48049	16.0561	0.0245769	-0.130045	-0.0102115	4.10375	4.17388
ZNF784	-2.48	14.662	0.0258057	-0.150425	-0.0112195	2.15462	2.23545
SLC25A24	-2.47956	12.8247	0.0278531	-0.130253	-0.00887015	3.34665	3.41621
CNOT3	-2.47939	11.5157	0.0297354	-0.0977723	-0.00608132	3.4058	3.45772
ZNF48	-2.47861	12.892	0.0278172	-0.133148	-0.00907773	3.16105	3.23216
SLC35A2	-2.47749	14.6622	0.0259326	-0.124728	-0.00924017	3.00659	3.07358
TFG	-2.47508	15.8694	0.0249945	-0.119622	-0.00920645	3.63	3.69442
ALPK3	-2.47489	16.54	0.0244863	-0.231537	-0.0181928	3.66585	3.79072
HMOX2	-2.47473	17.9948	0.0235123	-0.140703	-0.0114934	3.52911	3.60521
EAF1	-2.47403	12.8053	0.0281679	-0.13371	-0.00894674	3.0794	3.15073
PTPRK	-2.47367	17.3861	0.0239537	-0.129084	-0.0103556	3.48195	3.55167
SLC2A4RG	-2.47346	17.2806	0.0240347	-0.168335	-0.0134593	3.28786	3.37876
RNASET2	-2.47298	16.6037	0.0245339	-0.194819	-0.0152624	2.09426	2.1993
RPL34	-2.47239	12.0177	0.0293388	-0.104954	-0.00663296	3.66992	3.72571
ZNRF3	-2.47112	15.6673	0.0253591	-0.217441	-0.0164477	2.35802	2.47496
DMPK	-2.47069	15.7677	0.0252978	-0.128289	-0.00972669	2.99739	3.06639
YPEL5	-2.47032	16.2768	0.0249124	-0.115042	-0.00886115	3.52451	3.58646
NIPSNAP1	-2.46823	17.4419	0.0241857	-0.165663	-0.0131283	3.19649	3.28589
ZNF416	-2.46629	12.6354	0.0288014	-0.136089	-0.00879954	2.2626	2.33504
TPST1	-2.46607	14.7158	0.0264666	-0.144099	-0.0103674	2.75384	2.83107
[truncated: 10,069 more rows]

## Sheet: both.up
	cord.statistic.t	cord.parameter.df	cord.p.value	cord.conf.int1	cord.conf.int2	cord.estimate.mean.of.x	cord.estimate.mean.of.y	flow.statistic.t	flow.parameter.df	flow.p.value	flow.conf.int1	flow.conf.int2	flow.estimate.mean.of.x	flow.estimate.mean.of.y
ITPR1	30.7725	15.3926	3.03134e-15	3.32723	3.82128	5.31589	1.74163	6.58448	12.3529	2.25477e-05	0.121499	0.241106	3.09076	2.90946
ACTA2	28.9369	12.402	9.23397e-13	7.26851	8.44762	6.98965	-0.868407	2.77778	17.4259	0.0126817	0.0436431	0.317226	2.72751	2.54707
SYTL2	26.9602	20.5298	1.66269e-17	6.07867	7.09637	3.18903	-3.39849	3.24283	17.7698	0.00457474	0.086646	0.406317	1.94676	1.70028
CRISPLD2	26.3969	20.7336	1.94061e-17	7.88263	9.23202	4.47558	-4.08175	6.6026	16.9857	4.50074e-06	0.637947	1.23717	1.90572	0.968164
CEBPD	24.975	20.4512	8.44443e-17	4.98522	5.89247	5.14839	-0.290454	2.32228	17.9482	0.0321793	0.0177703	0.355816	2.69733	2.51054
ELN	24.5382	20.8653	7.16186e-17	9.64528	11.4323	10.7146	0.175786	9.50024	13.5116	2.3633e-07	1.10059	1.74526	3.65868	2.23575
FGF18	24.3152	18.9542	9.4277e-16	8.08181	9.60448	3.70365	-5.13949	8.22145	12.8997	1.74584e-06	0.849062	1.45498	1.55838	0.406363
MTURN	22.5254	21.6131	1.69944e-16	2.33418	2.80811	3.82213	1.25099	2.58871	16.4288	0.0194918	0.0290945	0.289174	2.89133	2.73219
CMKLR1	22.3411	19.479	2.38621e-15	7.2404	8.73452	4.7145	-3.27296	15.4924	11.5378	4.45089e-09	2.07275	2.7547	3.14017	0.726447
FNIP2	22.2819	18.4184	8.90622e-15	2.54532	3.07433	4.61805	1.80823	3.56333	14.1721	0.00306399	0.0548323	0.220168	3.20614	3.06864
IGFBP5	22.2707	21.7837	1.77511e-16	9.4492	11.391	5.53561	-4.88448	14.1396	13.7055	1.45979e-09	1.55599	2.11376	2.94608	1.1112
KLF4	22.1183	21.9258	1.7478e-16	6.99204	8.4392	6.81688	-0.898738	6.78105	7.72087	0.000165479	0.595293	1.21471	3.3053	2.40029
FBLN2	22.0102	21.8475	2.11375e-16	8.1682	9.86835	7.92002	-1.09826	6.11277	17.9999	8.95334e-06	0.75419	1.5441	3.77961	2.63047
TEK	21.5958	18.9786	8.05213e-15	2.13996	2.59932	6.9995	4.62986	8.63824	11.4926	2.30455e-06	0.272131	0.456924	4.15894	3.79441
NEO1	21.4561	21.2853	6.67832e-16	4.98146	6.04978	0.519012	-4.99661	4.51621	9.89823	0.00114397	0.196061	0.578965	1.40109	1.01358
DUSP1	21.3387	13.5758	7.78198e-12	4.33895	5.31181	8.53174	3.70636	2.20466	17.7349	0.0409351	0.00585087	0.248365	3.49134	3.36423
ITGA1	21.2493	16.3162	2.54404e-13	3.94417	4.81682	4.18555	-0.194945	7.00598	14.979	4.27051e-06	0.382219	0.716538	3.0384	2.48903
RAMP2	20.7428	17.3198	1.13094e-13	5.16058	6.32742	5.48737	-0.256629	3.89415	16.9005	0.00117768	0.128801	0.43369	3.46153	3.18028
NTN1	20.3409	20.1972	6.31637e-15	5.22426	6.41736	2.85018	-2.97064	5.13167	17.7221	7.32845e-05	0.323725	0.773393	1.65779	1.10923
AQP1	20.3199	21.7831	1.1982e-15	6.74766	8.28255	8.82677	1.31166	5.20898	14.6154	0.000115185	0.346639	0.828662	3.83459	3.24694
LYST	20.05	14.1875	8.23481e-12	3.0015	3.71957	4.70237	1.34183	8.79431	15.0824	2.52417e-07	0.166922	0.273652	3.25784	3.03755
SRL	19.716	21.1378	4.33009e-15	4.7788	5.9053	1.86459	-3.47746	4.19903	18	0.000539385	0.196857	0.5911	1.86141	1.46743
SLC22A4	19.6129	14.4765	7.84721e-12	2.67619	3.3311	2.64093	-0.362713	3.84176	16.4687	0.00137468	0.0584738	0.201718	2.47762	2.34753
MMP24	19.609	20.1256	1.37947e-14	2.5092	3.10632	1.49373	-1.31403	3.64261	17.9834	0.00186434	0.169004	0.629694	2.27581	1.87646
RAPGEF4	19.3566	17.0137	5.02568e-13	3.06861	3.81933	3.85021	0.406238	2.86572	10.2699	0.0163722	0.0378547	0.298262	2.7674	2.59935
PLCB4	19.2218	21.3616	5.75569e-15	3.87161	4.8099	3.38843	-0.952326	5.69076	16.5619	2.93154e-05	0.161786	0.35304	2.58265	2.32524
KCNN3	19.0146	15.957	2.18626e-12	4.33832	5.42732	3.81763	-1.06519	4.76524	13.9476	0.000304744	0.157242	0.414807	2.78981	2.50378
JPH4	18.9548	21.3346	7.84543e-15	5.91416	7.37027	1.39691	-5.24531	11.2448	13.1427	4.07007e-08	1.25156	1.84601	1.9592	0.410413
TGFBR3	18.9487	16.533	1.20936e-12	2.68201	3.35573	4.69571	1.67683	3.94591	17.9634	0.000950583	0.0793303	0.260057	3.33642	3.16672
CPAMD8	18.8523	10.1045	3.31645e-09	4.28011	5.42561	4.0209	-0.831964	4.30041	17.8692	0.000437183	0.128672	0.374737	2.49901	2.24731
TNXB	18.7513	19.9264	3.96886e-14	7.39598	9.24795	5.08864	-3.23332	8.95677	12.7328	7.44569e-07	0.908176	1.48717	2.5583	1.36062
CMAHP	18.7394	21.9842	5.25136e-15	5.29896	6.61784	4.82852	-1.12987	4.79235	14.3077	0.000270081	0.163223	0.426715	2.00488	1.70991
DLL1	18.6997	21.1516	1.23373e-14	4.13934	5.17471	4.00039	-0.656632	4.66087	14.2726	0.000349552	0.185654	0.501121	2.82432	2.48093
KANSL1L	18.6772	17.26	6.8919e-13	1.65198	2.07218	2.52767	0.665596	3.89355	12.9026	0.00187354	0.063097	0.220666	2.67318	2.5313
PTPN13	18.4732	21.8408	8.09978e-15	2.68065	3.35897	4.37765	1.35784	4.03594	18	0.000775235	0.118833	0.376876	2.6929	2.44504
FHDC1	18.4502	14.2023	2.52806e-11	5.18339	6.54496	1.80794	-4.05623	6.32171	14.4066	1.65185e-05	0.320062	0.647444	1.89815	1.4144
TXNIP	18.3691	19.7882	6.71956e-14	5.22689	6.56711	7.77633	1.87933	2.96012	14.3496	0.0101136	0.0935139	0.581452	3.44499	3.10751
AOC3	18.3264	22	8.20837e-15	7.387	9.27222	3.63432	-4.69529	2.45671	10.1242	0.0335947	0.0275338	0.554915	0.902569	0.611345
ATP8A1	18.2153	21.9873	9.42078e-15	4.05469	5.09664	4.34008	-0.235586	2.36382	15.9032	0.0311584	0.0292177	0.539532	3.08369	2.79932
TSC22D3	17.674	9.30967	1.77693e-08	4.06389	5.24999	6.02426	1.36732	7.0049	14.5362	5.04626e-06	0.329854	0.619541	3.58343	3.10873
PTPRB	17.6212	8.40897	6.20526e-08	2.03551	2.64257	7.63848	5.29944	3.48542	17.7172	0.00269202	0.0652816	0.263978	4.39965	4.23502
GLIS3	17.4918	21.7941	2.59006e-14	3.04945	3.87033	2.20664	-1.25325	2.46547	17.9803	0.0239769	0.0263044	0.329658	2.51432	2.33634
ST8SIA6	17.1806	21.5036	4.8454e-14	5.54766	7.07316	4.07339	-2.23701	11.7198	17.1541	1.29934e-09	0.645025	0.928013	3.0519	2.26538
PARM1	17.1485	21.8842	3.57967e-14	6.10005	7.77905	3.1996	-3.73995	5.98627	17.9869	1.16267e-05	0.557343	1.16013	1.71062	0.851879
NR4A1	17.1131	8.40858	7.89256e-08	6.69593	8.76131	6.94593	-0.782695	3.27171	16.9686	0.00450513	0.0703139	0.325773	2.47315	2.2751
PLVAP	17.0679	18.4099	9.79317e-13	4.18046	5.35195	6.70246	1.93626	4.34542	16.2716	0.000483087	0.21365	0.619597	4.04629	3.62966
RHOU	16.6706	20.3905	2.37728e-13	4.57534	5.88228	2.98387	-2.24494	2.59601	12.8627	0.0223287	0.0275776	0.302873	2.48291	2.31768
KLF11	16.5704	18.1832	2.02529e-12	2.8727	3.70622	3.64071	0.351243	3.80507	13.2176	0.00212585	0.0736527	0.266397	2.74919	2.57916
TNS1	16.5034	11.9257	1.41273e-09	2.58912	3.37737	7.25423	4.27099	4.10014	17.4352	0.00071241	0.118041	0.367319	4.02587	3.78319
CPE	16.4778	20.0937	3.86523e-13	5.93751	7.65809	9.06029	2.26249	2.81857	17.245	0.0117155	0.0639485	0.443041	3.69469	3.44119
TPST2	16.4144	19.4936	7.12283e-13	1.48817	1.9223	4.99935	3.29412	2.92384	15.8681	0.0100032	0.0323818	0.203579	3.6433	3.52532
SLCO2A1	16.0865	20.7074	3.56291e-13	7.28327	9.44811	7.64143	-0.72426	7.10068	14.4118	4.53335e-06	0.99301	1.84922	3.45042	2.02931
PER1	15.8676	8.78642	9.04672e-08	3.33315	4.44635	5.79298	1.90323	4.06793	16.1303	0.000881425	0.0619416	0.196571	3.12247	2.99321
MN1	15.7415	14.0296	2.60366e-10	3.6045	4.74141	4.26401	0.0910583	3.73712	14.2329	0.00215206	0.145889	0.537488	3.19955	2.85786
EPB41L4A	15.7285	17.5527	8.73609e-12	1.77976	2.32967	3.45677	1.40205	2.13957	17.0182	0.0471736	0.0011323	0.160751	3.17037	3.08943
ZNF423	15.7135	21.9779	1.95628e-13	3.22565	4.20662	4.59489	0.878747	3.09776	12.4309	0.00888907	0.0509609	0.289523	3.00748	2.83723
CAMK1D	15.5133	21.5221	3.66361e-13	3.54384	4.63919	3.02603	-1.06549	4.79953	17.912	0.000145409	0.139638	0.357197	2.5187	2.27028
CEP112	15.4633	17.1832	1.61472e-11	1.75468	2.30863	2.5852	0.553541	2.20086	17.2711	0.0416229	0.00251887	0.115979	2.86325	2.80401
ASS1	15.3921	17.1013	1.87351e-11	5.92325	7.80402	5.90447	-0.959166	5.04803	13.8276	0.00018482	0.293239	0.727386	2.90388	2.39357
CKB	15.3098	21.9997	3.25424e-13	3.32329	4.36471	1.98084	-1.86316	3.28234	17.6612	0.00422179	0.129085	0.589949	2.57794	2.21842
PTPRG	15.2943	10.0578	2.71191e-08	1.8634	2.49834	5.87336	3.69249	5.1877	13.0824	0.000171264	0.138301	0.335473	3.80084	3.56395
ATXN3	15.2076	15.9707	6.38771e-11	1.27336	1.68594	3.21688	1.73723	3.36529	13.2876	0.00493135	0.0317567	0.144937	3.0126	2.92425
NOV	15.1695	19.9185	2.09202e-12	4.5722	6.03058	1.75203	-3.54937	10.2733	17.9945	5.90687e-09	1.24573	1.88625	3.13429	1.5683
CD74	15.0629	19.9117	2.3953e-12	6.81345	9.00461	5.25759	-2.65144	2.47012	14.164	0.0268063	0.0336061	0.473086	1.32053	1.06719
PCDHGC3	14.927	16.9764	3.41596e-11	1.7411	2.31437	2.97107	0.943336	4.2486	12.6996	0.000998895	0.0586435	0.180578	3.08612	2.96651
TFEB	14.8684	17.0004	3.55894e-11	2.1242	2.82673	2.38077	-0.0946939	7.67798	17.6404	4.99535e-07	0.193054	0.338796	2.70875	2.44282
IL1R1	14.8066	18.7732	8.34677e-12	4.15922	5.52998	6.92738	2.08279	4.68115	14.95	0.000298076	0.158887	0.424675	3.05007	2.75829
B3GNT7	14.8027	21.4807	9.55161e-13	4.31935	5.72913	2.6881	-2.33614	3.14765	10.8422	0.00943681	0.114528	0.650246	1.99517	1.61278
PLPP1	14.6661	17.0714	4.15706e-11	2.41883	3.23139	2.8505	0.025394	6.63448	17.8161	3.3251e-06	0.403008	0.776934	3.36496	2.77499
CRTAC1	14.5564	12.8379	2.34679e-09	6.24898	8.43041	7.43955	0.0998555	2.87464	16.4825	0.0107585	0.122982	0.807641	3.05286	2.58755
SLC16A2	14.4179	17.0246	5.6715e-11	2.51589	3.37832	3.40752	0.460413	4.31502	12.6732	0.000888754	0.0725911	0.218927	2.82715	2.68139
PBX1	14.3902	12.4155	4.1036e-09	2.38353	3.23038	4.06779	1.26084	2.89126	17.4927	0.00993408	0.0342151	0.217514	3.08826	2.96239
PPM1L	14.3828	14.6595	4.79204e-10	2.23355	3.01258	2.50431	-0.118755	4.49385	17.4261	0.000302279	0.156268	0.431889	2.74602	2.45194
ZCCHC24	14.2983	16.1283	1.39793e-10	2.44903	3.301	4.05576	1.18075	4.05102	17.5669	0.000782787	0.0918279	0.290417	3.46967	3.27855
CSF2RB	14.2471	14.982	4.07301e-10	2.579	3.48654	6.68249	3.64972	2.22854	11.6819	0.0463034	0.00186345	0.190703	3.55763	3.46135
BCAM	14.2257	12.8809	2.97462e-09	2.42114	3.28914	4.9972	2.14206	3.21147	17.9145	0.00486134	0.0702077	0.336106	3.67917	3.47601
FGFR3	14.2076	21.9679	1.49108e-12	4.71807	6.33104	3.81496	-1.7096	5.87846	17.7785	1.5212e-05	0.414125	0.875407	2.20198	1.55722
TLR5	14.127	20.6276	4.49269e-12	5.21556	7.0185	1.85975	-4.25727	3.56887	13.5797	0.0032204	0.122633	0.494731	1.34252	1.03383
COL23A1	14.1072	16.2918	1.48664e-10	7.57668	10.2519	5.34984	-3.56445	6.51822	12.9115	2.01265e-05	0.51433	1.02481	2.1682	1.39863
KIAA0825	13.9659	21.2929	3.41403e-12	2.10408	2.83961	0.8062	-1.66564	2.83603	9.46336	0.0186097	0.0349457	0.300642	1.92748	1.75968
AK9	13.9288	15.0465	5.27808e-10	1.24324	1.69233	0.971956	-0.495826	3.21826	13.5961	0.00639578	0.0279461	0.140559	2.36487	2.28062
C9orf3	13.9015	12.8389	4.09676e-09	1.86051	2.54622	3.73938	1.53601	3.90338	15.4485	0.0013421	0.107779	0.365638	2.93517	2.69846
FGR	13.8989	20.0812	9.15694e-12	6.75694	9.14255	2.72547	-5.22428	5.33515	17.3072	5.15127e-05	0.558236	1.28693	1.28812	0.365535
SCUBE3	13.8682	8.69078	3.16112e-07	3.08896	4.30095	3.79904	0.10409	2.99592	15.8072	0.00864164	0.0697654	0.408569	2.78484	2.54567
NDRG1	13.7113	10.2927	6.06591e-08	3.43389	4.76038	7.07233	2.9752	15.2181	13.7505	5.39174e-10	0.38509	0.511695	3.7515	3.3031
PLPP3	13.6719	16.1235	2.74416e-10	2.23258	3.05137	6.1062	3.46422	12.3284	12.3753	2.57734e-08	0.414792	0.592154	4.17107	3.6676
MMRN2	13.5733	12.3848	8.38286e-09	1.46076	2.01711	7.93467	6.19574	7.37438	14.9776	2.33338e-06	0.165667	0.300391	4.64149	4.40846
FBN1	13.5708	11.8988	1.33927e-08	2.09201	2.89314	7.2069	4.71433	5.23162	17.6759	5.97524e-05	0.164201	0.385067	4.1225	3.84786
SNX25	13.5583	15.5428	5.04652e-10	0.793285	1.08816	3.16393	2.22321	3.72499	17.8782	0.00156512	0.03275	0.117577	3.12557	3.05041
KIAA1211L	13.512	20.324	1.28477e-11	1.7486	2.38629	1.96382	-0.103627	2.80154	17.6267	0.0119654	0.0368871	0.259463	2.62222	2.47404
ACSL5	13.4854	20.9421	8.568e-12	2.70481	3.69135	2.33786	-0.860219	3.07705	17.9999	0.00649733	0.0805152	0.427103	2.22069	1.96688
TANC2	13.4645	13.5816	3.05822e-09	1.93514	2.67098	5.19271	2.88966	11.6482	17.6215	1.04402e-09	0.267998	0.386169	3.7597	3.43262
HSPB8	13.4638	19.2686	2.96593e-11	1.81779	2.48624	3.33179	1.17978	3.37872	16.0577	0.00381206	0.0657262	0.286924	2.68655	2.51023
MYO7B	13.4593	21.9616	4.37055e-12	5.16722	7.04988	3.32884	-2.77971	3.30132	17.9272	0.00398666	0.162991	0.733981	1.09274	0.64425
NPR1	13.4182	18.6928	4.83605e-11	3.21729	4.40805	6.23111	2.41844	3.27828	12.4585	0.00630657	0.0969173	0.476417	3.63921	3.35254
PPP1R14A	13.3781	21.9773	4.87089e-12	5.06174	6.91913	1.22894	-4.76149	7.31422	14.8795	2.67423e-06	0.335097	0.610993	2.22356	1.75051
RBPMS	13.3724	15.9141	4.52933e-10	1.77094	2.43856	3.40435	1.2996	3.96056	10.4068	0.00248377	0.0413326	0.146379	3.17823	3.08438
PRSS35	13.3325	16.5192	2.89885e-10	6.18217	8.51274	0.461507	-6.88595	4.19263	17.262	0.000593278	0.536291	1.62026	1.61481	0.536532
DNM3	13.2899	21.9685	5.58035e-12	2.11058	2.89116	1.02699	-1.47388	6.91569	17.2873	2.27866e-06	0.147495	0.276763	2.10332	1.89119
COL9A3	13.1831	10.9994	4.40268e-08	5.45937	7.64767	2.8856	-3.66792	4.39354	14.9211	0.000529906	0.265072	0.765048	2.06169	1.54663
BSN	13.1331	16.0094	5.46688e-10	3.03448	4.20261	0.885558	-2.73299	3.79542	17.2346	0.0014151	0.139811	0.488992	1.47993	1.16553
DHH	13.096	19.7299	3.45992e-11	2.81758	3.88634	2.63443	-0.717531	7.17346	12.7566	8.02924e-06	0.462907	0.862992	2.56787	1.90492
BGN	12.9972	16.9386	3.08151e-10	2.27094	3.15138	8.36816	5.657	2.54513	17.7965	0.0204239	0.0269213	0.282774	5.06736	4.91251
PTGS1	12.9388	21.8946	9.89437e-12	3.52911	4.87681	7.23982	3.03686	4.09361	9.8503	0.00223589	0.217865	0.740669	3.14016	2.66089
UBL3	12.9304	9.99714	1.44734e-07	1.52034	2.15341	3.11078	1.27391	3.47715	12.4231	0.00435391	0.0262964	0.113671	3.14818	3.0782
ASAP3	12.9025	21.3789	1.46785e-11	2.14021	2.96163	4.50686	1.95594	6.26831	17.9907	6.55153e-06	0.238261	0.478506	3.28023	2.92185
PLCG2	12.902	14.4309	2.55315e-09	2.64367	3.69434	3.96687	0.797869	6.51694	16.8891	5.44399e-06	0.327659	0.641611	3.29135	2.80672
CCM2L	12.8936	21.7268	1.18217e-11	1.90156	2.63116	2.40028	0.133925	11.3683	15.8711	4.90056e-09	0.472109	0.688716	3.33119	2.75078
CYP2U1	12.7772	18.6601	1.13443e-10	1.66525	2.31866	2.68495	0.692994	3.31165	14.0824	0.00510614	0.0485275	0.226644	2.86669	2.7291
NIPAL3	12.7208	14.868	2.15796e-09	1.65272	2.31866	3.78396	1.79827	7.46934	10.4215	1.69489e-05	0.130155	0.239959	3.25175	3.06669
NFKBIA	12.6608	7.90117	1.58791e-06	2.98677	4.32062	6.65613	3.00243	5.24279	14.8262	0.00010315	0.186144	0.441621	3.82241	3.50853
PAG1	12.6501	21.1859	2.42268e-11	5.2152	7.26595	1.08375	-5.15683	4.88512	17.9958	0.000119199	0.322942	0.810332	1.60613	1.03949
ITGB4	12.6393	21.5945	1.88961e-11	4.48202	6.24385	6.93247	1.56953	8.75041	8.26142	1.8615e-05	0.649593	1.11103	4.03351	3.1532
CYP1B1	12.6028	20.839	3.25938e-11	7.62527	10.6408	5.14225	-3.9908	13.4056	11.3587	2.59364e-08	1.21263	1.68686	2.82506	1.37531
CDON	12.558	16.1511	9.46279e-10	3.65578	5.13934	3.94229	-0.455267	2.60664	10.7703	0.0247816	0.0184028	0.221498	2.48928	2.36933
NR3C1	12.5575	21.9129	1.74754e-11	1.5285	2.13341	4.60708	2.77612	2.56259	14.196	0.0223701	0.0187433	0.209662	3.2262	3.112
ALDH2	12.4646	21.9239	2.00332e-11	1.41863	1.98505	4.54559	2.84375	2.41142	17.534	0.0271035	0.0108567	0.159983	3.66102	3.5756
NET1	12.4378	10.3638	1.46611e-07	1.92307	2.75761	5.36218	3.02183	4.70186	13.3178	0.000388073	0.0947131	0.255014	3.22027	3.0454
THRB	12.3474	21.8536	2.51124e-11	5.74487	8.06534	2.38319	-4.52192	2.8424	16.4211	0.0115404	0.073137	0.498833	1.76348	1.47749
PLA2G6	12.3447	11.2204	7.09817e-08	2.21872	3.17876	1.88503	-0.813708	2.73345	17.782	0.01375	0.0245574	0.188312	2.19675	2.09031
GHR	12.3402	21.8124	2.60547e-11	3.73431	5.24394	1.62817	-2.86096	2.26025	17.6233	0.0367201	0.0114411	0.319867	1.96693	1.80128
CXXC5	12.2827	15.5981	1.98585e-09	2.26359	3.21033	2.57225	-0.164702	5.41958	13.4001	0.000105343	0.174916	0.405637	2.9881	2.69782
APOL6	12.2821	21.5803	3.29309e-11	2.60379	3.66318	3.05413	-0.0793559	3.14223	16.0987	0.00625955	0.0668481	0.343659	2.32073	2.11548
CREBRF	12.2597	15.5239	2.15747e-09	2.51005	3.56276	3.41678	0.380371	2.18926	17.8656	0.0421017	0.00444447	0.2187	3.07088	2.95931
KCND1	12.2579	12.752	1.9953e-08	3.2849	4.69389	1.27658	-2.71282	6.80874	16.1531	3.99355e-06	0.315697	0.600843	2.19525	1.73698
LIMS2	12.2556	18.0239	3.53262e-10	3.35557	4.74389	5.74117	1.69144	5.38721	10.553	0.000254969	0.254171	0.608418	3.50406	3.07277
KLRD1	12.2126	14.7703	4.06078e-09	5.13373	7.30813	1.08375	-5.13718	2.92648	10.7825	0.0140462	0.0778213	0.554741	1.07046	0.754178
ACACB	12.1469	14.7153	4.55789e-09	3.23369	4.61287	3.04614	-0.877139	2.46764	16.0988	0.0251859	0.0174938	0.230039	1.96376	1.83999
APOL1	12.1169	18.3594	3.37865e-10	2.5505	3.61866	4.02444	0.93986	5.09672	16.6444	9.5492e-05	0.141136	0.341076	3.28509	3.04398
NPTXR	12.0277	21.4699	5.23479e-11	2.48735	3.52562	1.43558	-1.5709	4.62242	16.8676	0.000247883	0.158284	0.424396	2.50662	2.21528
BCL3	11.9566	18.7932	3.15395e-10	1.60843	2.29165	3.31955	1.36951	2.2566	16.4904	0.0379271	0.00911947	0.281127	3.17234	3.02721
MSRB3	11.9497	17.2119	9.25793e-10	1.15264	1.64637	5.10433	3.70482	2.6189	12.2652	0.0220911	0.0132099	0.142171	3.60835	3.53066
MPZL2	11.937	21.5635	5.70529e-11	2.70343	3.84192	5.70553	2.43286	5.47368	14.2392	7.71989e-05	0.222797	0.509149	3.54674	3.18077
AMY2B	11.9249	21.8497	4.90251e-11	3.8354	5.45107	1.07109	-3.57214	2.47959	12.2996	0.0285509	0.0225535	0.342186	1.39185	1.20948
FOXP1	11.9212	9.71728	4.06014e-07	1.51633	2.21684	6.23583	4.36924	3.88339	12.0027	0.00217357	0.0577167	0.205256	3.70269	3.5712
CD14	11.8467	21.9658	5.19046e-11	5.94387	8.46684	2.59646	-4.6089	3.77	8.16805	0.00526265	0.225716	0.930287	1.25096	0.672959
STOM	11.833	11.7054	7.26371e-08	1.85775	2.69916	7.19024	4.91178	7.06338	15.1811	3.60143e-06	0.15416	0.28721	4.11833	3.89765
MIR4697HG	11.8266	20.4658	1.31754e-10	5.85735	8.36161	1.12389	-5.98559	8.68946	17.9648	7.52127e-08	0.581243	0.952001	1.26858	0.501962
RASGEF1B	11.7925	18.8987	3.71017e-10	5.92085	8.47726	2.36379	-4.83527	5.22218	11.7117	0.000231702	0.615446	1.50082	1.98021	0.922079
MAP3K1	11.7906	11.7095	7.52663e-08	1.43466	2.08728	4.05348	2.29251	3.97566	15.3523	0.00116866	0.0718573	0.237244	3.26634	3.11179
AMIGO1	11.7709	21.7914	6.49519e-11	2.27091	3.24291	0.999893	-1.75702	2.26204	12.2141	0.0426918	0.00536048	0.271944	2.31188	2.17323
PARP9	11.7349	14.2883	9.99094e-09	2.21295	3.20049	3.9094	1.20268	3.08764	15.1768	0.00742059	0.0478599	0.260533	2.94249	2.78829
KLF2	11.7318	11.689	8.08583e-08	4.29973	6.2682	6.17636	0.892402	3.3046	7.33811	0.0121861	0.126144	0.740603	4.10532	3.67195
TMOD1	11.7141	21.8326	6.95093e-11	4.37155	6.25345	2.67154	-2.64097	4.3423	17.9909	0.000392939	0.250951	0.721435	2.68327	2.19707
OSMR	11.667	21.7114	8.04675e-11	2.39604	3.43298	4.68169	1.76718	3.26255	15.5653	0.00503797	0.0383507	0.18158	3.48837	3.3784
FOXS1	11.5924	18.4175	6.70762e-10	4.49251	6.47738	-0.0482777	-5.53322	5.68955	16.8595	2.74584e-05	0.563229	1.22781	1.90144	1.00592
ST6GALNAC1	11.5262	16.9334	1.94388e-09	4.89698	7.09221	3.72582	-2.26878	7.89495	12.7195	2.97209e-06	0.743871	1.30608	2.3688	1.34383
KLF9	11.5146	9.48121	6.93737e-07	2.37098	3.51928	5.47731	2.53218	3.60089	17.0137	0.00220223	0.0662121	0.253559	3.3934	3.23351
INPP5K	11.5039	12.2765	6.1674e-08	0.922567	1.35236	3.92611	2.78865	4.70281	15.1265	0.000277012	0.0883552	0.234639	3.40506	3.24357
C11orf96	11.4842	10.6967	2.37376e-07	3.54686	5.23596	1.86438	-2.52703	3.26657	14.2646	0.00550553	0.0571002	0.274344	2.26544	2.09972
IGSF9B	11.4531	21.7447	1.11826e-10	5.43122	7.83504	2.53748	-4.09565	6.30249	10.4358	7.35423e-05	0.448041	0.933824	1.49452	0.803584
ANAPC16	11.4204	9.3637	8.32496e-07	0.926827	1.38134	3.70888	2.5548	3.04148	12.5046	0.00982664	0.0243761	0.145594	3.22702	3.14203
CFLAR	11.388	11.031	1.9368e-07	0.829703	1.22709	5.99231	4.96392	2.52483	15.9518	0.0225559	0.00999209	0.114776	3.92772	3.86534
SERPINE2	11.3607	21.4207	1.56214e-10	3.81083	5.51613	5.2697	0.606221	3.65549	17.0546	0.00194947	0.123436	0.460219	3.15356	2.86174
RNASE1	11.3548	9.242	9.80665e-07	2.23605	3.34314	6.83515	4.04556	3.06296	13.5581	0.00869914	0.04858	0.277878	3.87742	3.71419
SYNE1	11.2886	18.92	7.58139e-10	1.65582	2.40985	5.26959	3.23676	5.28949	17.849	5.12174e-05	0.0932118	0.216168	3.27251	3.11782
PLA1A	11.2795	21.4261	1.77831e-10	6.12359	8.88795	3.59579	-3.90998	4.49191	17.4128	0.000304078	0.527308	1.45821	2.59963	1.60687
RASSF9	11.1922	15.777	6.51965e-09	2.73636	4.01697	2.73457	-0.642095	7.61989	16.4723	8.61169e-07	0.209005	0.369604	2.85489	2.56559
ZNF81	11.172	15.9307	6.02938e-09	0.728817	1.07033	1.51466	0.61509	3.14594	11.4564	0.00888816	0.029806	0.166443	2.68979	2.59166
HEG1	11.1353	14.8443	1.32992e-08	2.61072	3.84817	8.25266	5.02322	11.2987	15.5997	6.44448e-09	0.275625	0.403269	4.27228	3.93284
ATP2A3	11.1333	21.5909	2.06606e-10	5.52694	8.0608	4.23587	-2.558	7.47423	17.2004	8.45364e-07	0.661803	1.18173	1.8867	0.964933
VASN	10.9691	11.0029	2.90499e-07	2.28644	3.43428	1.13392	-1.72643	4.50072	17.9206	0.000279354	0.235435	0.647908	1.58598	1.1443
TGM2	10.9373	15.4438	1.12536e-08	1.08908	1.61467	9.20007	7.84819	6.49568	13.8635	1.48027e-05	0.173496	0.344783	5.06067	4.80153
MOB2	10.8657	9.50563	1.13579e-06	1.30085	1.97799	4.1181	2.47868	6.99821	12.7568	1.03686e-05	0.10378	0.196728	3.2169	3.06664
NAB1	10.8568	12.761	8.2098e-08	1.04533	1.56594	3.51009	2.20446	2.70816	11.1268	0.020173	0.0113165	0.108813	3.19698	3.13691
SETDB2	10.8354	15.1448	1.56207e-08	1.49275	2.2231	1.64205	-0.215878	2.49641	14.2181	0.0254209	0.0136271	0.178185	2.4761	2.38019
FRY	10.8251	11.215	2.79987e-07	1.33257	2.01076	5.26633	3.59467	2.53074	12.3393	0.0259189	0.0142855	0.187375	3.5758	3.47497
ADARB1	10.8142	9.15063	1.62287e-06	1.19135	1.81962	3.72644	2.22096	3.80034	17.322	0.00138913	0.0362591	0.126476	3.34161	3.26024
PGM5	10.7754	16.3264	7.81422e-09	6.80039	10.1248	5.44015	-3.02244	6.18286	10.5509	8.24036e-05	0.703794	1.48816	1.85671	0.760731
FILIP1L	10.763	21.9008	3.28033e-10	1.54103	2.27689	4.29572	2.38676	6.09657	17.9509	9.36348e-06	0.1617	0.331796	3.62693	3.38018
ADPRH	10.7612	21.9967	3.13103e-10	1.52501	2.25313	1.81923	-0.0698415	2.70308	9.32613	0.0235386	0.0135679	0.148382	2.6475	2.56653
RAB6B	10.7431	15.6352	1.27059e-08	3.23674	4.83192	3.47805	-0.556282	3.33029	17.9963	0.00372451	0.0560317	0.24755	2.84146	2.68967
TMTC1	10.7189	17.9857	3.06255e-09	4.29743	6.39287	6.2491	0.903945	6.66094	10.7579	3.96403e-05	0.527981	1.05124	3.2064	2.41679
MEDAG	10.6468	11.0368	3.82491e-07	1.42298	2.16426	4.43529	2.64167	2.56894	17.8187	0.0194218	0.0356745	0.357248	3.53587	3.33941
VSTM4	10.6448	16.6286	7.71992e-09	5.33804	7.98273	2.80508	-3.8553	2.38138	11.9849	0.0346996	0.0254591	0.574043	1.93244	1.63269
FAM167B	10.6223	19.5404	1.4602e-09	2.72429	4.05821	0.460723	-2.93053	4.94523	12.1831	0.000324229	0.273686	0.703512	2.78623	2.29763
CFP	10.5768	14.1114	4.30378e-08	2.78741	4.20412	1.05503	-2.44073	9.4086	17.0439	3.67068e-08	0.659847	1.04123	2.2073	1.35676
DUSP5	10.5505	8.52229	3.50699e-06	2.56552	3.98133	5.7717	2.49827	3.19448	13.8094	0.00658863	0.0905107	0.461846	3.31548	3.03931
HVCN1	10.5449	16.1418	1.1958e-08	1.80812	2.71723	0.0141088	-2.24856	5.26181	9.71144	0.000404394	0.1303	0.323049	2.34476	2.11808
MPP7	10.5285	19.6148	1.62716e-09	4.61461	6.89854	3.72107	-2.0355	2.96228	16.0591	0.00914502	0.0847086	0.510616	2.30683	2.00916
MCF2L	10.5153	19.1436	2.15062e-09	5.35791	8.01921	3.18281	-3.50575	3.14347	17.8349	0.00566597	0.219649	1.10668	1.39843	0.735266
CAMKK1	10.497	8.47428	3.81432e-06	1.88323	2.93051	2.63508	0.228211	4.40364	15.8249	0.000454918	0.139476	0.398866	2.36715	2.09798
GNA14	10.4961	21.9942	4.98104e-10	2.49505	3.72383	2.16817	-0.941273	6.32924	14.2282	1.72761e-05	0.308588	0.624209	2.7481	2.2817
SEMA6A	10.485	14.7409	3.1617e-08	2.18968	3.30925	2.16903	-0.580433	5.06842	17.9931	8.0173e-05	0.221652	0.535517	2.95508	2.5765
EHBP1L1	10.4753	8.35121	4.33601e-06	1.6246	2.53323	4.82166	2.74274	6.29941	17.8812	6.33064e-06	0.15153	0.303289	3.28176	3.05436
GJC2	10.4524	16.3152	1.21835e-08	3.2407	4.88641	0.953118	-3.11044	7.43147	17.9162	7.09076e-07	0.227491	0.406896	2.22445	1.90726
IFIT2	10.4392	21.954	5.61754e-10	3.05349	4.56772	1.39948	-2.41112	3.09122	15.2819	0.00731785	0.0869619	0.471221	2.58124	2.30214
IRAK3	10.4347	15.64	1.89525e-08	1.97593	2.98585	4.6731	2.19221	3.34752	12.8543	0.00532032	0.042526	0.197808	3.17734	3.05717
NDRG4	10.4251	20.8289	1.01527e-09	2.0134	3.01747	5.67126	3.15582	3.50075	11.4083	0.00470656	0.107875	0.468971	3.89713	3.60871
STOX2	10.4161	19.0081	2.70607e-09	4.83076	7.26027	2.00302	-4.04249	7.72812	17.9471	4.07444e-07	0.665087	1.16185	2.28519	1.37172
KCNN4	10.3629	18.8264	3.24863e-09	4.90758	7.39364	2.07419	-4.07642	11.6965	12.8465	3.21171e-08	1.3274	1.92973	2.129	0.500433
ADCY4	10.2737	15.28	2.93414e-08	2.17313	3.30859	6.21012	3.46926	6.58362	17.8929	3.59389e-06	0.145441	0.281856	3.52648	3.31283
HYAL1	10.2619	18.4649	4.63213e-09	2.55652	3.86981	2.19344	-1.01973	6.50174	12.3868	2.51824e-05	0.544655	1.09084	2.19427	1.37652
ADAM8	10.2315	12.2666	2.30728e-07	4.92238	7.57793	1.91032	-4.33983	2.19523	14.7781	0.0445507	0.00437124	0.310317	1.09537	0.938031
ITGA9	10.2196	18.7235	4.29769e-09	3.30014	5.0022	2.36658	-1.78459	5.1326	14.0715	0.00014986	0.397175	0.96693	2.31821	1.63615
ENTPD1	10.2135	16.7524	1.31028e-08	2.12023	3.22581	5.28999	2.61697	3.71828	16.2382	0.00182811	0.117957	0.429983	4.15249	3.87852
STMN3	10.1986	16.9187	1.21543e-08	3.88704	5.91571	3.9368	-0.964579	3.11534	11.9553	0.00896803	0.122669	0.694233	2.14132	1.73287
ZNF844	10.1492	19.1497	3.82886e-09	2.90402	4.41196	2.23196	-1.42603	4.11585	17.8444	0.000659387	0.0681845	0.210555	1.96555	1.82618
XAF1	10.0803	9.11645	3.03558e-06	2.64844	4.17723	2.9675	-0.44533	2.77626	16.9917	0.0129395	0.0292055	0.214151	2.52752	2.40585
HIP1	10.0466	12.7982	1.95484e-07	0.929005	1.43904	4.98417	3.80015	4.01664	17.9602	0.000812383	0.0590706	0.188676	3.8289	3.70503
APOL3	10.0415	21.788	1.2365e-09	2.03016	3.08775	4.04552	1.48656	3.21673	13.3355	0.00655536	0.0949958	0.480544	3.25851	2.97074
TMEM205	10.0208	20.5367	2.34115e-09	1.06061	1.61707	2.56201	1.22318	2.99122	15.9134	0.00867646	0.0242847	0.142634	2.95538	2.87192
CEP350	10.0029	11.3142	5.84547e-07	0.609925	0.952566	4.3513	3.57006	2.20263	12.54	0.0469927	0.000697691	0.0892299	3.39262	3.34765
ZNFX1	9.95001	8.48881	5.74846e-06	1.03439	1.65045	5.4481	4.10568	3.13582	16.3105	0.00626508	0.0272305	0.140334	3.66717	3.58339
AC104083.1	9.92792	21.9391	1.41591e-09	4.73982	7.24344	2.83194	-3.15969	2.16829	15.7684	0.0457926	0.00515269	0.482146	2.6175	2.37385
FMOD	9.91391	20.2318	3.2644e-09	6.30027	9.65489	3.96219	-4.01538	4.15591	16.3034	0.000717351	0.18803	0.578384	1.31569	0.932478
SULF1	9.83591	18.1568	1.06026e-08	4.1333	6.37685	9.77779	4.52272	2.44393	12.0485	0.0308619	0.0409423	0.71114	4.63685	4.26081
TNS2	9.83262	9.98718	1.87362e-06	1.48698	2.35856	6.02366	4.10088	4.45226	16.2205	0.00038896	0.0878198	0.247125	3.72194	3.55447
METTL7A	9.82525	17.5468	1.48942e-08	1.97279	3.04847	4.02302	1.5124	5.83751	12.2762	7.29811e-05	0.358803	0.784455	3.10904	2.53741
BMPER	9.80032	19.4245	5.88429e-09	4.57886	7.0611	4.50916	-1.31082	3.42953	16.2878	0.00336523	0.246916	1.04329	2.25748	1.61238
DYNC2H1	9.79076	21.2842	2.45537e-09	1.61131	2.47952	3.09625	1.05084	2.79515	16.8104	0.0125282	0.0430531	0.309065	2.78317	2.60711
TMBIM1	9.76514	10.0198	1.94582e-06	1.11579	1.77527	6.3836	4.93807	3.30672	12.4071	0.00600781	0.0462897	0.223239	3.85882	3.72406
ADAMTS15	9.74843	20.8984	3.16732e-09	5.45922	8.42118	2.42955	-4.51064	6.06454	13.9305	2.97674e-05	0.62726	1.3142	2.1107	1.13997
ERO1B	9.71539	17.5071	1.79956e-08	1.27242	1.97638	0.937638	-0.686764	2.51689	16.0467	0.022847	0.0154108	0.179752	2.54104	2.44346
SYNPO	9.71231	15.0366	7.17043e-08	1.65616	2.5872	7.11	4.98832	6.11848	13.0374	3.62385e-05	0.182872	0.382408	4.48164	4.199
AHCYL2	9.71063	18.1409	1.30229e-08	1.21541	1.88605	3.40795	1.85722	2.17398	13.1385	0.0485602	0.00054822	0.149145	3.14337	3.06853
DENND2D	9.70511	21.9445	2.12712e-09	2.91438	4.4987	1.46137	-2.24517	5.17213	17.7906	6.64334e-05	0.197206	0.467396	1.74644	1.41414
CASKIN2	9.67796	10.6458	1.32426e-06	1.10841	1.76441	4.17713	2.74072	8.63578	17.3064	1.104e-07	0.22346	0.36769	3.56755	3.27197
TSC22D1	9.67398	8.49752	7.12028e-06	2.16271	3.49856	6.20189	3.37126	2.75775	17.9662	0.0129717	0.0283291	0.209657	3.61111	3.49212
CALHM2	9.66957	14.1211	1.31299e-07	1.14612	1.7988	3.08274	1.61029	4.10385	11.4713	0.00160326	0.17709	0.582374	3.27627	2.89654
ELMO1	9.64997	15.9653	4.58727e-08	1.30987	2.04756	4.51056	2.83185	3.23527	11.8011	0.00729293	0.0293092	0.150899	3.49594	3.40584
IPCEF1	9.64146	21.6449	2.73412e-09	4.56394	7.06845	0.582959	-5.23324	3.73313	12.8408	0.00255725	0.135387	0.50844	1.18736	0.865448
LYNX1	9.63336	14.9989	8.15517e-08	2.54844	3.99658	2.15211	-1.1204	3.62232	16.4142	0.00220858	0.124317	0.473412	2.77545	2.47659
TLE1	9.61878	12.0682	5.197e-07	1.06282	1.68482	4.28317	2.90936	2.72843	14.9485	0.0155831	0.0133903	0.109139	3.58779	3.52653
MYOM3	9.61351	21.0814	3.70641e-09	4.10569	6.37164	1.76026	-3.47841	10.5234	9.38559	1.67053e-06	0.961073	1.48324	2.31769	1.09554
MBOAT1	9.58458	18.0969	1.62683e-08	1.0335	1.61349	0.492387	-0.831107	3.165	11.1939	0.00881774	0.0473283	0.261953	1.85755	1.70291
PTPRJ	9.57764	17.6163	2.10314e-08	2.14199	3.34818	4.16076	1.41568	2.71038	15.4479	0.015803	0.0333889	0.276372	2.89684	2.74195
CYYR1	9.56488	12.799	3.41989e-07	1.89072	2.99628	4.67169	2.22819	5.55624	12.5533	0.000105568	0.143386	0.326909	3.46986	3.23471
SMAD9	9.53266	20.2099	6.37805e-09	1.48083	2.30974	3.42895	1.53367	4.89311	12.7865	0.000308057	0.0928679	0.240149	2.69291	2.5264
IL10RA	9.53217	21.9753	2.89632e-09	5.3478	8.32209	1.91429	-4.92065	4.94615	16.6021	0.000131241	0.324	0.807557	1.63432	1.06854
SLC2A3	9.52321	10.713	1.47372e-06	2.73589	4.38767	5.57894	2.01716	4.16656	17.9877	0.000580485	0.0881299	0.267418	3.59249	3.41472
SOCS5	9.4832	11.6547	7.98269e-07	1.26285	2.01947	2.79195	1.15078	4.40522	16.65	0.000404971	0.0822034	0.233783	3.14888	2.99089
LRP11	9.48276	9.77243	3.06004e-06	1.22844	1.98615	3.62321	2.01591	2.29945	17.0022	0.034423	0.00694191	0.16139	3.0809	2.99674
PLCD3	9.455	10.8252	1.45912e-06	1.35505	2.17946	3.74063	1.97338	7.46812	17.9974	6.44197e-07	0.242658	0.432632	3.51209	3.17445
TIMP1	9.45391	19.2989	1.11903e-08	1.96022	3.07348	6.58509	4.06824	4.34509	12.5396	0.000861917	0.0981875	0.293826	3.66749	3.47149
TCEAL1	9.33291	12.1899	6.64178e-07	1.16284	1.86954	1.48586	-0.0303296	2.98099	15.4537	0.00908832	0.0271147	0.161963	2.65378	2.55924
CLDN15	9.32029	11.0215	1.46501e-06	1.03955	1.68212	1.97832	0.617479	8.92577	13.4061	5.22994e-07	0.517152	0.846096	3.16748	2.48586
PRR5	9.30291	17.4321	3.55192e-08	1.3573	2.15159	1.46517	-0.289274	6.19415	17.9858	7.61786e-06	0.154979	0.314084	2.64911	2.41457
RBMS2	9.28929	9.9167	3.30544e-06	1.0455	1.70631	5.67475	4.29884	3.12492	12.6213	0.00830824	0.0227652	0.12576	3.71743	3.64317
NPEPPS	9.27212	18.3753	2.35375e-08	0.724691	1.14851	3.96125	3.02465	4.43355	13.9848	0.000568465	0.0564896	0.162383	3.66921	3.55977
AVPI1	9.27161	12.6176	5.44191e-07	1.66301	2.67752	1.81819	-0.352077	3.97602	17.268	0.000950762	0.11113	0.361772	2.30691	2.07046
PTPN6	9.25148	17.1561	4.421e-08	4.73408	7.52868	1.17112	-4.96026	2.25467	17.5507	0.0371893	0.0154024	0.447991	0.87053	0.638834
DENND2A	9.23075	21.5375	6.14891e-09	4.25344	6.72247	0.664777	-4.82318	5.4563	16.7477	4.49659e-05	0.335102	0.758429	2.17238	1.62562
RARG	9.22669	13.2572	3.8855e-07	1.14775	1.84774	2.73975	1.24201	2.74317	11.4431	0.0185165	0.0166008	0.148235	2.92849	2.84607
CALCOCO2	9.1784	11.9819	9.07368e-07	0.897921	1.45705	4.25528	3.0778	2.96253	12.1257	0.011747	0.0258473	0.168941	3.41226	3.31487
CDH22	9.17307	15.7278	1.03863e-07	3.87238	6.20441	-0.218565	-5.25696	5.38261	9.00097	0.000442815	0.242833	0.594905	1.40568	0.986809
MAGI2	9.10595	14.4724	2.25529e-07	1.37493	2.2188	1.1732	-0.623666	3.03279	14.9798	0.00840323	0.0353281	0.202478	2.41595	2.29705
LHX6	9.10156	21.3788	8.37949e-09	3.28815	5.23306	3.48992	-0.770683	2.26975	14.2364	0.0392644	0.0157311	0.54087	2.87405	2.59575
MTERF2	9.08782	14.1281	2.80266e-07	1.10537	1.78753	1.34446	-0.101986	3.78011	12.2896	0.00251907	0.0531277	0.196818	2.32476	2.19979
ACKR3	9.06297	15.1059	1.69474e-07	2.89322	4.67113	7.07	3.28782	3.38387	17.9685	0.00331405	0.0878628	0.375722	3.52704	3.29525
PMEPA1	9.05062	18.618	3.04304e-08	1.42979	2.29158	4.2593	2.39861	2.6583	10.8126	0.0225486	0.0219637	0.236012	3.53776	3.40877
CCDC69	9.04508	21.9992	7.25722e-09	1.74453	2.7825	3.87313	1.60962	10.4445	14.1953	4.76853e-08	0.53378	0.809209	3.565	2.8935
HECA	9.04321	15.5177	1.40193e-07	0.9719	1.56906	3.68593	2.41545	3.41607	16.3145	0.00345616	0.0258282	0.109966	3.43528	3.36739
HSPA1A	9.03058	21.2427	1.01319e-08	1.10304	1.76246	2.34156	0.908812	3.47636	17.9513	0.00270323	0.0570741	0.231516	2.8595	2.71521
HSPA1B	9.0099	9.03921	8.21689e-06	1.89109	3.15793	3.28649	0.761979	3.55503	15.7325	0.0026987	0.0504081	0.199841	2.73576	2.61063
NCOA3	8.87653	8.05544	1.96312e-05	0.996425	1.69471	4.95181	3.60625	2.33106	9.78024	0.0425167	0.00238717	0.113403	3.41254	3.35465
GPD1L	8.85912	12.3077	1.08216e-06	1.02621	1.69317	3.19944	1.83975	5.86104	10.9495	0.00011114	0.132507	0.292018	3.17693	2.96467
EPB41L1	8.85773	11.254	2.08032e-06	2.09052	3.46788	3.69922	0.920024	2.99447	16.6003	0.00831388	0.0364279	0.211268	3.136	3.01215
LRP4	8.81445	10.9199	2.7051e-06	1.26383	2.10605	2.77801	1.09307	4.10714	17.9236	0.0006668	0.0851804	0.263695	2.87913	2.70469
MEF2A	8.76416	8.89606	1.14391e-05	1.23198	2.0913	4.78669	3.12505	7.09721	14.812	3.90904e-06	0.151811	0.28234	3.68821	3.47114
STARD8	8.76211	12.1922	1.30451e-06	0.924127	1.53441	3.80771	2.57844	7.97472	14.6231	1.06243e-06	0.226706	0.392605	3.40355	3.0939
TRIOBP	8.76152	10.5105	3.74161e-06	0.839156	1.40651	5.49034	4.3675	3.42577	13.697	0.00421486	0.0343424	0.149985	3.82816	3.736
EVA1C	8.75287	12.2339	1.28688e-06	0.973954	1.61772	3.44912	2.15328	5.81981	17.9484	1.65212e-05	0.123088	0.262206	3.03464	2.842
AKAP13	8.73226	15.0895	2.75268e-07	0.824491	1.3566	5.55412	4.46358	2.86301	17.9622	0.0103536	0.0198089	0.12909	3.84288	3.76843
ALS2CL	8.72148	9.13401	1.00195e-05	1.89455	3.21756	4.12045	1.5644	7.41659	16.2869	1.30992e-06	0.267381	0.480982	2.83343	2.45925
TLR3	8.71073	21.0042	2.04598e-08	2.22859	3.62641	1.5639	-1.3636	3.16487	10.4126	0.00959996	0.0688448	0.390515	2.03565	1.80597
VSIR	8.70339	10.6448	3.64861e-06	2.39173	4.01973	3.68982	0.484091	2.28555	17.9882	0.0346339	0.0172249	0.409474	2.86832	2.65498
CC2D2B	8.68697	16.9461	1.19767e-07	3.36959	5.53208	0.764446	-3.68639	2.67113	16.9196	0.0161629	0.0651093	0.555406	1.85798	1.54772
MTMR9LP	8.67487	18.6808	5.64786e-08	1.95603	3.20196	3.95778	1.37879	2.69405	17.7939	0.0149411	0.0323134	0.262095	3.00808	2.86088
PLAC9	8.65908	21.981	1.55858e-08	1.97841	3.22461	1.84577	-0.755746	10.7793	15.3411	1.4709e-08	0.797844	1.19019	2.47166	1.47764
MINDY1	8.63835	21.7118	1.79575e-08	0.942463	1.53856	2.6367	1.39619	3.62256	16.3263	0.00222394	0.0525255	0.20015	2.90874	2.78241
ADAMTSL4	8.63547	7.75271	3.03924e-05	2.0989	3.63995	3.39815	0.528722	6.13439	14.5863	2.1605e-05	0.243727	0.504268	1.97629	1.60229
CEP85L	8.59658	8.68201	1.55926e-05	1.02511	1.76287	3.06995	1.67596	3.06915	12.2151	0.00955377	0.0263243	0.154303	2.79837	2.70806
CLIC2	8.58838	20.6702	2.94218e-08	3.61615	5.9299	3.52844	-1.24458	4.68366	9.87202	0.000893186	0.251956	0.710744	2.72823	2.24688
PLEKHG3	8.56028	13.3485	8.73887e-07	1.65429	2.76719	3.13827	0.927536	4.08141	16.5766	0.000814359	0.114988	0.362081	2.61277	2.37424
CDKN2D	8.48344	10.5073	5.06225e-06	1.94274	3.31456	1.57419	-1.05445	4.69666	11.6418	0.000561088	0.0889127	0.243779	2.43307	2.26672
DSTN	8.45224	11.6276	2.64784e-06	1.14883	1.95067	5.98682	4.43707	4.82014	8.94278	0.000964068	0.0611172	0.169414	4.03441	3.91914
GLIS2	8.42477	17.959	1.18432e-07	1.36339	2.26949	2.04451	0.228069	3.26947	16.3937	0.00469519	0.047396	0.221236	3.1748	3.04048
ARL4D	8.41689	14.5724	5.65222e-07	1.59565	2.68157	1.5586	-0.580011	8.84536	10.9908	2.49752e-06	0.466127	0.774983	2.72178	2.10122
SPTAN1	8.40223	7.56787	4.25044e-05	1.52877	2.70137	8.29813	6.18306	6.27751	17.4381	7.42208e-06	0.119336	0.239812	4.41932	4.23975
TMEM38A	8.39483	17.5619	1.47571e-07	1.35593	2.26332	0.643892	-1.16573	8.25796	14.9829	5.85983e-07	0.313284	0.531299	2.66329	2.241
ACKR4	8.37305	12.7837	1.52062e-06	3.63968	6.17685	2.15484	-2.75342	3.96881	16.7657	0.001016	0.257269	0.84256	2.27412	1.7242
ARHGEF40	8.36287	19.679	6.60087e-08	1.6265	2.70905	3.42734	1.25957	3.26425	15.2184	0.00514558	0.0550916	0.261665	2.94537	2.78699
ZMIZ1	8.34108	9.80721	9.2338e-06	1.30667	2.26269	5.50107	3.71639	7.04229	15.537	3.27873e-06	0.198143	0.369402	4.06517	3.7814
SLC12A6	8.27011	12.7711	1.75247e-06	0.772616	1.32035	3.97689	2.9304	2.75585	11.1917	0.0184281	0.0124795	0.110468	3.50476	3.44328
ZFAND2B	8.2656	9.97299	8.98818e-06	0.79043	1.37414	2.44703	1.36475	2.8691	12.2207	0.0138886	0.0202488	0.147019	2.74544	2.66181
PLEKHA6	8.19829	16.7276	2.93276e-07	1.29835	2.19968	3.31662	1.56761	8.42267	14.3511	6.26118e-07	0.343042	0.576717	2.93919	2.47931
TCN2	8.18643	19.8838	8.50884e-08	1.03449	1.7423	4.99005	3.60165	3.16181	15.8383	0.00610483	0.0585953	0.297639	3.77743	3.59932
IFIT3	8.14948	13.647	1.31349e-06	2.67082	4.58508	2.39895	-1.229	3.23976	17.7837	0.00460206	0.0509937	0.239608	2.52729	2.38199
G0S2	8.14361	11.546	4.03142e-06	5.28883	9.17575	1.44482	-5.78747	8.507	16.3599	2.09437e-07	0.783692	1.30268	1.54736	0.504178
ARL4A	8.13287	10.5447	7.30689e-06	1.71253	2.99262	3.66807	1.31549	7.50753	12.0406	7.02023e-06	0.268605	0.488144	3.31096	2.93259
FAM107A	8.10325	10.0338	1.03044e-05	2.5248	4.43866	4.66759	1.18586	3.27975	17.5065	0.0042849	0.072842	0.33395	2.76288	2.55948
ACP5	8.10149	21.6376	5.40436e-08	3.60504	6.08899	1.15159	-3.69542	3.92212	12.4208	0.00190289	0.362234	1.26009	2.04146	1.23029
RGS11	8.09994	9.05417	1.93353e-05	1.94749	3.4549	3.10726	0.406059	2.75933	17.3859	0.0132064	0.0485023	0.361356	2.45795	2.25302
OAS1	8.08721	12.6915	2.32854e-06	2.61209	4.52277	1.95989	-1.60754	6.83705	17.993	2.13044e-06	0.353888	0.667866	2.23628	1.7254
MR1	8.07612	19.5041	1.20622e-07	2.04118	3.46592	0.427638	-2.32591	2.57765	10.6222	0.0263443	0.0243944	0.318209	1.92157	1.75027
CHD9	8.03621	7.8955	4.55393e-05	0.975868	1.76385	5.18063	3.81077	3.18578	13.3443	0.00695758	0.0226494	0.117315	3.64495	3.57497
DTX3L	7.98631	13.0554	2.21593e-06	1.18952	2.07119	3.64994	2.01959	3.28218	13.0729	0.00590869	0.0462147	0.223919	3.19833	3.06326
HIF3A	7.98389	16.4939	4.62086e-07	3.1709	5.45598	3.16636	-1.14708	3.66084	17.4941	0.00185969	0.243549	0.902786	2.63038	2.05721
ALDH1A2	7.93199	19.7446	1.45475e-07	2.10768	3.61349	5.53452	2.67393	5.41904	12.4623	0.000135967	0.292633	0.683491	3.58683	3.09877
MTMR11	7.8839	8.55744	3.32154e-05	1.31129	2.37839	2.18853	0.343691	4.5667	14.6367	0.000393712	0.180709	0.498327	2.52175	2.18224
NAP1L2	7.83196	20.5955	1.32088e-07	2.04543	3.52678	0.114183	-2.67192	2.55522	17.0342	0.0204663	0.0311642	0.326143	1.8092	1.63055
ZNF467	7.81527	17.0316	4.94756e-07	1.72563	3.00163	2.6176	0.25397	5.77412	14.11	4.67023e-05	0.197318	0.43026	3.49566	3.18187
SIGIRR	7.79454	16.3391	6.75539e-07	0.881779	1.53908	2.90656	1.69614	4.0083	15.1837	0.00111486	0.0620641	0.202714	3.16645	3.03406
LRRC1	7.69438	11.6718	6.61434e-06	1.33792	2.39958	2.69753	0.82878	3.09769	13.67	0.00805946	0.0362472	0.200627	2.85488	2.73644
GSE1	7.67963	8.82983	3.40828e-05	1.25917	2.31514	3.76192	1.97476	2.43461	15.7291	0.0272172	0.0194492	0.284343	3.16064	3.00874
GCH1	7.67669	11.1392	8.95279e-06	1.57491	2.8383	1.08822	-1.11839	3.43743	14.7952	0.00372952	0.0901335	0.385279	2.39347	2.15577
NFE2L2	7.67008	15.6744	1.08807e-06	1.05834	1.8687	4.22679	2.76327	2.86482	14.3579	0.0122265	0.0240464	0.165982	3.57871	3.4837
KMT2E	7.65742	10.72	1.15015e-05	0.890912	1.61288	4.84822	3.59632	2.56557	13.0456	0.0234376	0.0110675	0.128817	3.741	3.67105
LLGL2	7.62557	16.8409	7.40032e-07	1.30077	2.29687	2.08291	0.284087	4.101	17.9962	0.000670983	0.139249	0.431799	2.3655	2.07998
NRG3	7.62556	15.688	1.16404e-06	1.49267	2.64472	3.1902	1.1215	2.45605	14.0343	0.0276825	0.0117455	0.173321	3.21502	3.12249
CNNM2	7.62512	8.62414	4.10109e-05	1.45031	2.68549	1.76015	-0.307756	4.5846	16.8651	0.000268676	0.0704806	0.190789	2.64688	2.51624
KANK3	7.62486	19.6693	2.7081e-07	1.61413	2.83171	3.74413	1.52121	4.4356	17.7453	0.0003295	0.0788533	0.221048	3.67467	3.52472
OAS2	7.61717	16.1663	9.75138e-07	3.28491	5.81549	2.67128	-1.87892	3.59459	17.5836	0.00213675	0.132908	0.508324	2.16693	1.84631
MKNK2	7.59771	21.8274	1.4479e-07	0.879687	1.54064	5.71349	4.50332	7.03828	17.9198	1.48083e-06	0.235172	0.435403	4.25057	3.91528
IL33	7.56603	21.9044	1.51343e-07	3.1086	5.45707	5.01651	0.733673	2.11809	16.4029	0.0497688	0.000192574	0.338823	3.32617	3.15666
TNRC6B	7.55579	8.39201	5.09323e-05	0.764342	1.42805	4.96638	3.87018	4.09676	12.9831	0.00126405	0.0476769	0.15409	3.50359	3.40271
ALPL	7.54137	9.92658	2.05083e-05	4.1013	7.54601	0.790324	-5.03333	2.39843	17.5326	0.0278321	0.04946	0.758927	1.06306	0.658871
POLR3GL	7.52377	15.5683	1.44422e-06	0.783821	1.40073	1.14429	0.0520105	2.55597	16.201	0.0210005	0.0124784	0.133093	2.43369	2.3609
THADA	7.51422	16.7552	9.28001e-07	0.441695	0.787095	3.1753	2.5609	2.8522	17.1352	0.0109597	0.0211636	0.141177	3.01913	2.93796
MALT1	7.48248	17.9422	6.39528e-07	0.957483	1.70531	2.52141	1.19001	3.40894	14.323	0.00411637	0.0365197	0.159737	2.79463	2.6965
HECTD2	7.4586	13.512	3.79318e-06	1.06189	1.92321	2.12253	0.62998	2.86587	10.2804	0.0163522	0.0230771	0.181696	2.63982	2.53744
ARHGAP31	7.45345	10.0354	2.13393e-05	0.455366	0.843448	5.51289	4.86348	4.4009	14.6991	0.000540218	0.0570496	0.164582	4.03431	3.92349
LINC02035	7.4525	16.4328	1.16567e-06	1.12127	2.0101	0.603541	-0.962142	2.24387	17.8308	0.0377835	0.00608035	0.186741	2.3345	2.23809
PLBD1	7.44881	15.0855	1.98103e-06	3.28044	5.90852	0.685923	-3.90856	4.68495	8.81245	0.0012111	0.304485	0.876666	1.32668	0.736103
ADAMTS1	7.4465	20.9176	2.6126e-07	2.32756	4.13197	6.8664	3.63664	13.6353	12.3259	8.40966e-09	0.98959	1.36468	4.24315	3.06601
S100A4	7.44184	9.10844	3.68003e-05	2.77643	5.19526	0.697219	-3.28863	10.5365	16.4281	1.01334e-08	0.52793	0.793169	2.11501	1.45446
RASSF5	7.43432	8.25806	6.2491e-05	2.66496	5.04285	1.05634	-2.79756	2.55844	17.9945	0.0197511	0.0454477	0.46289	1.55641	1.30224
HEATR5B	7.43253	12.6011	5.95442e-06	0.32054	0.584432	3.52669	3.0742	3.76513	13.4912	0.00221934	0.0279239	0.10246	3.19701	3.13181
MIR99AHG	7.39255	8.84354	4.54116e-05	1.57003	2.95998	2.25906	-0.00594509	2.29023	16.3409	0.0356215	0.00689997	0.17483	2.12139	2.03053
SYNE3	7.3616	9.72472	2.81887e-05	0.95919	1.79645	4.41271	3.03489	6.23237	16.6728	9.94242e-06	0.24343	0.493157	3.37759	3.00929
LGALS9	7.33585	13.5642	4.45185e-06	1.79103	3.27735	3.20055	0.66636	3.24817	12.899	0.00640851	0.117799	0.58681	3.12858	2.77627
FXYD6	7.31433	16.632	1.37876e-06	3.80518	6.89761	3.2284	-2.123	6.12724	16.8784	1.15295e-05	0.312116	0.640216	2.71509	2.23892
WBP1	7.3022	16.2962	1.59089e-06	1.24966	2.26992	0.961079	-0.798709	2.72848	15.1189	0.0154598	0.021149	0.171685	2.02303	1.92662
BATF2	7.27026	9.56698	3.4139e-05	2.33889	4.42447	1.4771	-1.90459	4.13416	14.5687	0.000935262	0.105491	0.331238	1.88144	1.66308
KCTD12	7.19382	9.36712	4.15845e-05	1.42846	2.72761	7.23334	5.15531	2.78074	16.9701	0.0128294	0.0336689	0.24554	4.46955	4.32995
CALCRL	7.18448	9.25418	4.47581e-05	1.55772	2.98079	7.74228	5.47302	7.45753	14.8891	2.1156e-06	0.176266	0.317475	4.41859	4.17172
POF1B	7.15545	19.6445	6.938e-07	4.23011	7.71699	1.99062	-3.98293	5.57863	10.8316	0.000175148	0.463848	1.07026	1.38942	0.622362
ARL4C	7.09975	10.3032	2.81919e-05	1.30178	2.48569	2.09078	0.197048	2.23353	15.1584	0.0409972	0.00618513	0.259444	2.95515	2.82234
KLF8	7.07065	20.4267	6.58571e-07	2.15751	3.95982	2.2023	-0.856368	11.8308	16.8711	1.36675e-09	0.580463	0.832605	2.6734	1.96686
PSMB9	7.04298	19.2831	9.6834e-07	1.94991	3.59656	0.392573	-2.38066	2.18361	12.2143	0.0491943	0.000955299	0.461279	1.70097	1.46986
SNTB2	7.03706	8.63859	7.44862e-05	0.6843	1.33884	6.01623	5.00466	2.56631	17.9989	0.019426	0.0248965	0.249686	3.86569	3.7284
DOK5	7.02748	20.8543	6.40867e-07	1.99729	3.67725	1.5672	-1.27006	5.47305	17.6139	3.64065e-05	0.17414	0.391681	2.32931	2.0464
AGPAT4	7.0177	18.2426	1.39281e-06	0.707641	1.31156	2.84558	1.83598	3.14018	16.8135	0.00603014	0.0255155	0.130279	2.9759	2.898
HEIH	6.97406	10.6057	2.83645e-05	0.583659	1.12553	1.15597	0.301375	2.13943	15.3251	0.0488808	0.000382478	0.137024	2.74078	2.67207
SERPINB1	6.96753	8.48791	8.74138e-05	1.23054	2.43005	4.05036	2.22006	2.75459	17.0597	0.0135057	0.0404112	0.304574	3.21301	3.04051
SYNGAP1	6.96358	10.0868	3.71584e-05	1.08276	2.09994	3.16915	1.5778	2.22239	13.9883	0.0432589	0.00165214	0.0931777	2.98232	2.9349
MST1	6.95703	13.3358	8.68981e-06	0.992851	1.88388	0.635221	-0.803147	2.32805	14.3539	0.0350039	0.0116295	0.276067	2.17283	2.02898
COQ8A	6.95532	10.5573	2.97376e-05	0.722251	1.39601	1.85748	0.798348	3.86319	17.8556	0.00115367	0.0800832	0.271271	2.77638	2.6007
ARHGAP4	6.94366	14.9365	4.81292e-06	1.0161	1.9167	3.64597	2.17957	2.5553	17.6798	0.0200645	0.0163517	0.168676	3.10776	3.01525
GPER1	6.93558	15.0387	4.70121e-06	1.3634	2.57282	1.62801	-0.340098	7.60778	12.4411	5.04191e-06	0.261968	0.471087	2.78725	2.42073
JAG1	6.93221	12.215	1.43722e-05	0.680362	1.30231	5.56742	4.57608	2.79515	17.9821	0.0119682	0.0298176	0.210341	3.55593	3.43585
PLCD4	6.92568	8.65341	8.32011e-05	1.07943	2.13621	1.338	-0.26982	3.73417	13.7126	0.00229624	0.107777	0.400006	1.93881	1.68492
COX7A1	6.92254	16.4965	2.90627e-06	1.64508	3.09227	2.02857	-0.340104	2.39746	17.7574	0.0277328	0.015159	0.231674	2.23838	2.11497
C10orf128	6.88587	16.1669	3.46329e-06	1.77753	3.35691	1.86282	-0.704404	4.76578	17.9578	0.00015547	0.224698	0.5791	2.65416	2.25226
C1orf115	6.87244	14.518	6.31055e-06	0.696437	1.32528	3.79457	2.78371	3.39151	11.7427	0.00550993	0.0306994	0.141767	3.4328	3.34657
NXF1	6.86875	9.29108	6.26584e-05	0.527096	1.04112	4.28084	3.49673	2.26587	16.741	0.0370227	0.00459028	0.130866	3.3824	3.31467
GJA5	6.86304	21.8532	7.06289e-07	2.6094	4.87059	4.8135	1.07351	3.32939	14.4599	0.00477597	0.121237	0.556596	3.83127	3.49235
PRKCZ	6.8621	16.5369	3.19967e-06	3.24703	6.13902	1.90242	-2.7906	4.9115	10.118	0.000591819	0.296707	0.78803	2.47186	1.92949
BCL6	6.86067	8.76121	8.40933e-05	1.17541	2.33907	2.78444	1.02719	3.46152	13.238	0.00411186	0.0562156	0.241988	2.83435	2.68525
STAT6	6.85217	14.0974	7.62217e-06	0.467496	0.893096	5.53954	4.85924	4.00156	11.1323	0.00203248	0.0448984	0.154311	3.93676	3.83715
KCNJ12	6.82689	21.9929	7.39525e-07	1.03834	1.94447	0.723508	-0.767896	3.31635	17.9976	0.0038407	0.0766824	0.341788	2.21854	2.00931
PPFIBP2	6.81722	21.5627	8.39982e-07	1.56535	2.93646	0.888662	-1.36224	3.04043	16.3079	0.00766221	0.0729594	0.407305	2.32263	2.08249
SYNC	6.79205	17.6751	2.55527e-06	0.917633	1.74113	0.887396	-0.441984	8.71543	17.8483	7.58203e-08	0.213396	0.349064	3.02665	2.74542
COL8A2	6.79059	18.7373	1.87978e-06	2.2113	4.18452	3.61115	0.413235	2.38101	16.1819	0.0298779	0.014343	0.245324	2.42663	2.29679
ENDOD1	6.78763	11.5521	2.34813e-05	0.75819	1.47963	4.26909	3.15018	7.44443	10.1707	2.00132e-05	0.291433	0.539599	3.71723	3.30171
GABPB2	6.77337	15.5694	5.16076e-06	0.685825	1.31274	1.76901	0.769729	2.43286	12.4759	0.0308717	0.0123217	0.215445	2.36555	2.25166
ADD1	6.68363	8.91329	9.43825e-05	0.426277	0.86345	6.18561	5.54075	3.65868	14.7712	0.00238149	0.0357146	0.135727	4.22631	4.14059
DDIT4	6.67262	9.00274	9.12156e-05	2.14528	4.34579	4.77914	1.5336	2.22606	13.6662	0.0433827	0.00779262	0.446635	3.97403	3.74682
DRC3	6.67093	12.127	2.17377e-05	1.06697	2.10021	0.516464	-1.06713	2.37771	17.99	0.0287155	0.0119668	0.193693	1.71741	1.61458
GNAZ	6.66266	20.5424	1.51586e-06	1.35084	2.57917	0.580663	-1.38434	8.84932	14.7056	2.83975e-07	0.377245	0.617181	2.35941	1.8622
ZNF655	6.64746	19.7436	1.91808e-06	0.744129	1.42553	2.16001	1.07518	2.4969	11.9074	0.0282102	0.0123211	0.182266	2.48076	2.38346
GRAMD4	6.63933	12.3817	2.05477e-05	0.781298	1.54071	2.69358	1.53258	3.73137	16.1928	0.00178541	0.0516393	0.1872	3.27788	3.15846
SPAG9	6.62966	8.32266	0.000137368	0.485116	0.997282	5.08281	4.34161	2.81094	15.1618	0.0130608	0.0192665	0.139676	3.72531	3.64584
CNKSR3	6.62394	9.90817	6.16151e-05	1.45167	2.92611	3.76868	1.57979	2.38863	17.2836	0.0285715	0.0113963	0.182046	3.17913	3.08241
TOB1	6.62007	12.2955	2.18813e-05	1.43843	2.84419	1.85187	-0.289441	2.61548	8.27921	0.0299935	0.0162515	0.246984	2.91355	2.78193
ESYT2	6.57517	7.83406	0.000190767	0.609222	1.27113	5.34274	4.40257	5.4957	17.1918	3.78438e-05	0.100439	0.225437	3.8229	3.65996
HAUS7	6.5549	8.4326	0.0001404	1.12933	2.3385	0.70357	-1.03035	3.43849	15.5714	0.0034898	0.0858244	0.363405	1.83024	1.60562
GLUL	6.50752	7.84252	0.000203581	1.06685	2.2443	6.75275	5.09718	4.46163	12.761	0.000669922	0.0596759	0.172136	3.85398	3.73807
TMEM2	6.49858	11.6288	3.41498e-05	0.457502	0.921483	4.57335	3.88386	3.5558	14.2602	0.00308352	0.0331675	0.133565	3.853	3.76963
NFYC	6.44965	17.9465	4.61305e-06	0.371355	0.73028	2.51949	1.96868	2.23787	9.871	0.0495144	0.000154214	0.119261	3.02322	2.96351
LRRC75A	6.43407	12.0775	3.13944e-05	0.894535	1.8096	2.61345	1.26138	2.99647	16.8673	0.00816865	0.0601883	0.347208	2.61768	2.41398
RNF125	6.42975	13.4944	1.87471e-05	1.62546	3.26129	1.7086	-0.734781	5.76821	17.5807	1.99283e-05	0.246173	0.52899	2.73295	2.34536
PROX1	6.41623	16.286	7.84201e-06	1.35171	2.6828	2.33377	0.31651	7.66086	13.4916	2.84582e-06	0.196843	0.350673	3.10759	2.83384
CDH11	6.40585	21.1373	2.30873e-06	1.42785	2.79978	6.12575	4.01193	2.88532	16.7653	0.0103854	0.0869786	0.562126	3.74036	3.41581
LGALSL	6.3926	13.6517	1.8855e-05	0.93106	1.87467	0.749022	-0.653844	2.24479	16.8879	0.0384715	0.00597626	0.194387	2.56884	2.46865
ELF1	6.37094	7.5837	0.000270527	0.878365	1.89008	4.41553	3.03131	2.97001	10.3015	0.0136214	0.0217465	0.15033	3.53988	3.45384
IFT140	6.3564	15.5729	1.0815e-05	0.819074	1.64154	2.66469	1.43438	2.55156	17.9753	0.0200486	0.0140283	0.144905	2.99584	2.91638
PIK3C2B	6.32207	20.1483	3.47433e-06	0.959637	1.90407	4.79033	3.35848	6.99117	13.0208	9.38415e-06	0.166008	0.314453	4.0006	3.76037
SEMA3F	6.31135	15.0216	1.38624e-05	0.714372	1.44279	5.85718	4.7786	6.0534	10.4585	0.000102134	0.179218	0.386054	4.21306	3.93042
FLI1	6.31083	17.3788	7.06215e-06	0.378798	0.758328	5.29563	4.72707	3.18703	9.59749	0.0102057	0.0253231	0.145272	3.98575	3.90045
GPR162	6.29407	21.9371	2.49975e-06	0.932487	1.84919	2.48733	1.09649	5.53212	16.0164	4.53386e-05	0.171156	0.383795	3.10844	2.83097
KAT2B	6.25342	9.02847	0.00014703	1.57632	3.36182	3.42601	0.956943	3.70652	17.1666	0.0017283	0.0710567	0.258518	3.26212	3.09733
THY1	6.25106	21.3056	3.14781e-06	2.74691	5.4822	1.93509	-2.17946	2.46024	17.4512	0.0245793	0.0482758	0.62166	2.37532	2.04035
TBC1D32	6.24117	9.6796	0.000110698	0.869634	1.8421	0.194106	-1.16176	2.9273	13.7324	0.0112168	0.0320257	0.208791	2.01958	1.89917
FCHO2	6.22251	8.64809	0.00018298	0.859271	1.85056	3.32962	1.9747	6.89338	13.7743	8.07032e-06	0.122928	0.234221	3.49483	3.31625
PCDH7	6.20791	20.0267	4.57448e-06	1.29537	2.60629	4.61602	2.66519	3.02256	12.0262	0.0105891	0.11855	0.730287	3.17527	2.75085
RNPC3	6.20065	9.11041	0.000150781	0.747573	1.60385	1.6729	0.49719	3.11707	14.0655	0.00753538	0.0319092	0.17249	2.43061	2.32841
STIM2	6.19889	14.5908	1.92749e-05	0.698777	1.43387	3.40421	2.33789	6.75985	14.79	6.90337e-06	0.130876	0.251635	3.1267	2.93545
ZNF181	6.16631	13.747	2.65569e-05	0.631577	1.30704	0.733309	-0.236	2.47365	17.673	0.0237675	0.00967047	0.119656	2.38893	2.32427
CEMIP	6.14943	12.0332	4.89151e-05	1.61536	3.38732	0.23427	-2.26707	2.16562	15.0559	0.0468012	0.00552433	0.680853	1.83128	1.48809
MRAS	6.13775	15.9463	1.45081e-05	1.28558	2.64275	4.06227	2.09811	3.27357	17.528	0.00433746	0.0536205	0.246794	3.25595	3.10574
RAPGEF5	6.09253	18.1593	8.97992e-06	0.889414	1.82478	4.87322	3.51613	11.0051	16.6858	4.56631e-09	0.281958	0.415947	4.03754	3.68858
GPNMB	6.08552	16.5031	1.3785e-05	3.06264	6.32463	0.0577407	-4.6359	5.41789	16.1987	5.45381e-05	0.19186	0.438108	1.32994	1.01496
HYAL2	6.08539	9.40335	0.00015231	0.802642	1.74268	7.39068	6.11802	6.91085	17.1087	2.43357e-06	0.187787	0.352718	4.37877	4.10852
L3MBTL1	6.06293	11.1003	7.85118e-05	0.980742	2.09669	1.17643	-0.362283	3.40484	15.5179	0.00375927	0.0353547	0.152798	1.98802	1.89395
AL365205.1	6.04475	13.9597	3.05148e-05	1.32837	2.79005	0.277233	-1.78197	13.4313	17.8452	9.08387e-11	0.445031	0.610192	2.8752	2.34758
ZDHHC17	6.04035	9.77048	0.000137778	0.722454	1.57125	2.85712	1.71027	6.09405	17.3668	1.08651e-05	0.11025	0.226727	3.10376	2.93527
NR1D1	6.03365	8.52647	0.000241638	1.86125	4.12466	2.71444	-0.278511	2.36399	15.6403	0.0313843	0.00538955	0.100735	2.64501	2.59195
FAS	6.02086	10.8867	9.04398e-05	0.920872	1.9842	1.21364	-0.238898	5.23115	17.9993	5.64553e-05	0.191602	0.448798	2.54955	2.22935
FAM160A2	6.01926	11.5298	7.13607e-05	0.490899	1.05188	2.93496	2.16357	2.88607	16.835	0.0103365	0.0211831	0.136652	2.97219	2.89327
RFX3	6.00673	10.9544	8.99378e-05	0.612629	1.3218	1.41487	0.447649	2.34684	11.799	0.037256	0.00400338	0.110642	2.76886	2.71154
ATL1	6.00482	21.2267	5.59075e-06	1.05659	2.17506	-0.353447	-1.96927	2.42161	17.7642	0.0263899	0.0292577	0.415385	2.08362	1.8613
SELPLG	6.00239	10.3065	0.000116362	2.28696	4.96998	0.943699	-2.68477	5.90948	11.5356	8.39064e-05	0.356536	0.775955	1.90656	1.34031
HSPA12B	5.99848	13.8502	3.41456e-05	0.96193	2.03436	3.70216	2.20401	13.5738	12.5132	7.41978e-09	0.592524	0.817893	3.59288	2.88767
WNT2B	5.97351	8.41809	0.000272744	0.900181	2.01645	1.11496	-0.343354	3.00545	11.6646	0.0112698	0.0406343	0.25735	2.18518	2.03618
SMPDL3B	5.96145	21.8908	5.4414e-06	2.50399	5.17674	-0.44467	-4.28504	3.10819	14.4197	0.0074812	0.0707922	0.383241	1.69574	1.46872
INSR	5.91101	21.6283	6.42411e-06	0.974239	2.02896	4.53232	3.03072	2.34308	17.9083	0.0308755	0.00986255	0.181604	3.92145	3.82572
CD58	5.90771	11.9654	7.25145e-05	1.12032	2.4302	1.74727	-0.0279926	3.9851	15.1037	0.00118026	0.0761565	0.251071	2.58647	2.42286
ETS2	5.906	12.5821	5.92488e-05	0.482398	1.04184	4.30954	3.54742	5.73968	16.5049	2.69761e-05	0.111818	0.242275	3.63729	3.46025
WDSUB1	5.89134	14.2441	3.65917e-05	0.655068	1.40319	-0.147576	-1.17671	3.11657	15.2299	0.00696901	0.044329	0.235359	2.42904	2.2892
WDR78	5.88154	10.8641	0.000111324	1.62439	3.57191	0.302161	-2.29599	3.90391	15.6358	0.00131345	0.0831442	0.281564	1.97152	1.78916
RECK	5.86962	16.1152	2.30451e-05	0.845875	1.80144	3.50402	2.18037	3.37709	17.936	0.00337087	0.0407773	0.175129	3.31134	3.20339
FBXO3	5.86143	11.5981	8.8269e-05	0.388428	0.850882	2.81429	2.19463	2.55452	10.9744	0.0268215	0.0101549	0.136856	3.02635	2.95285
KIAA1522	5.83204	21.0384	8.59777e-06	0.639247	1.34767	3.50473	2.51127	10.1013	16.013	2.36865e-08	0.260595	0.399014	3.88475	3.55495
SENCR	5.82546	18.3928	1.48191e-05	0.684473	1.45482	0.998378	-0.071268	9.49632	10.8852	1.34016e-06	0.170406	0.273401	2.80234	2.58044
RBMS2P1	5.82008	11.6294	9.29884e-05	0.848025	1.86865	0.755602	-0.602735	2.26722	13.2378	0.040742	0.00543711	0.2171	1.55581	1.44454
RAB27A	5.79644	18.9341	1.40579e-05	1.1354	2.41925	2.66457	0.887241	3.94747	9.09957	0.00329557	0.0479189	0.176059	3.09726	2.98527
MCPH1	5.76275	19.3972	1.37643e-05	0.277307	0.592942	2.23326	1.79813	2.85315	12.0774	0.0144564	0.0191874	0.142807	2.83	2.749
BFSP1	5.75628	13.3538	5.97845e-05	0.813176	1.78607	0.529419	-0.770204	5.51318	15.0095	5.94296e-05	0.226094	0.511075	2.80497	2.43638
SH3BP2	5.73931	8.20778	0.000395021	0.503773	1.17555	4.94861	4.10895	7.38754	17.903	7.72682e-07	0.182813	0.328194	3.77337	3.51786
TCTEX1D1	5.73919	21.8182	9.26973e-06	1.17813	2.51233	0.380419	-1.46481	2.36454	13.2829	0.0339101	0.00912545	0.197519	2.11858	2.01526
EXOC3L2	5.72859	21.4505	1.013e-05	1.52758	3.26528	0.513368	-1.88306	4.11774	12.9664	0.00121855	0.214059	0.68684	2.5358	2.08535
BAIAP2	5.70592	7.69233	0.000520612	0.950671	2.25549	3.08217	1.47909	2.49386	12.0133	0.0282122	0.010511	0.155754	2.78659	2.70345
AVIL	5.66082	9.11613	0.000295039	0.900807	2.0961	-0.00141058	-1.49986	2.90192	15.3411	0.010754	0.0464578	0.301641	1.46271	1.28866
SLC9A3R2	5.63074	10.5575	0.000178428	0.869218	1.99427	4.68431	3.25257	17.4965	17.7624	1.2128e-12	0.463602	0.590269	4.24445	3.71751
IRAK4	5.63052	10.2536	0.000198926	0.364766	0.839881	2.32748	1.72516	3.74866	10.3319	0.00358323	0.0420819	0.164103	3.01252	2.90943
CD79B	5.60504	21.8881	1.25683e-05	1.44505	3.14321	0.384326	-1.9098	2.42461	12.9186	0.030745	0.0514759	0.898162	1.50463	1.02981
EFR3B	5.53284	17.3519	3.39241e-05	0.837144	1.86654	0.171004	-1.18084	8.29193	16.5931	2.66554e-07	0.284125	0.478543	2.41346	2.03213
STPG1	5.52961	11.207	0.000166507	0.578917	1.34166	1.1909	0.230618	6.98708	12.2565	1.30525e-05	0.138988	0.264526	2.62516	2.4234
FGF2	5.49929	17.4769	3.54368e-05	1.13277	2.53825	3.61057	1.77506	5.68512	15.7144	3.62138e-05	0.193488	0.424131	3.61708	3.30827
ZBTB38	5.48994	10.3364	0.000236054	0.380424	0.896328	5.01776	4.37939	3.38493	17.2569	0.00346079	0.0373826	0.160719	3.73966	3.64061
ENSA	5.47832	18.4307	3.07204e-05	0.205456	0.460373	4.07663	3.74372	2.61974	11.2699	0.0234216	0.0111554	0.126314	3.4503	3.38156
DNASE1L1	5.47355	15.6941	5.46419e-05	0.501181	1.13644	3.82921	3.0104	6.67072	14.9582	7.57746e-06	0.197192	0.382445	3.67228	3.38246
RASSF3	5.43514	18.8882	3.09837e-05	0.292706	0.659564	4.22401	3.74787	2.43536	15.1654	0.0276757	0.00850891	0.12696	3.68014	3.61241
LGALS3	5.41508	8.7364	0.000470133	0.963279	2.35655	2.9013	1.24139	3.48584	8.1426	0.00802429	0.0437201	0.213098	3.06645	2.93804
FLOT1	5.40618	21.9529	1.99595e-05	0.428899	0.962862	5.0511	4.35522	3.33336	17.9583	0.00370773	0.0609109	0.268673	3.40206	3.23727
PIK3R3	5.37934	9.00788	0.000443559	0.99613	2.44159	2.90975	1.19089	2.96443	17.5756	0.00846016	0.0471492	0.277948	3.03726	2.87471
FAM46C	5.37301	7.30274	0.000903288	3.14098	8.00556	2.38521	-3.18806	5.48899	17.9741	3.27929e-05	0.180579	0.404569	1.79617	1.5036
IRF9	5.3715	10.3229	0.000281475	0.848827	2.04353	0.166261	-1.27992	3.8575	15.5141	0.00146558	0.0895079	0.309152	1.53387	1.33454
YBX3	5.37136	8.35779	0.000577288	0.624524	1.55204	6.68481	5.59653	3.04599	14.1223	0.00864673	0.0248772	0.142964	4.30792	4.224
AFTPH	5.3702	7.97502	0.000676474	0.418091	1.04797	3.00673	2.2737	2.82516	9.90469	0.0181606	0.016322	0.138909	3.19485	3.11723
FGD6	5.34836	13.2223	0.000124909	0.410159	0.964466	3.07461	2.3873	2.39255	9.21308	0.039785	0.0037122	0.12469	3.25616	3.19196
EPAS1	5.34168	11.9746	0.000177249	0.641971	1.52679	7.26701	6.18263	3.20864	17.9685	0.00487743	0.033492	0.160582	4.87363	4.77659
NOS3	5.33494	9.3417	0.000416086	0.795274	1.95499	6.43747	5.06234	5.53144	16.2446	4.31379e-05	0.217645	0.487595	4.09986	3.74724
EPHX1	5.32879	11.0169	0.000240265	0.600684	1.4458	1.85972	0.836482	6.43906	13.8038	1.65823e-05	0.183149	0.366465	3.23998	2.96517
RYBP	5.32262	11.3041	0.000222287	0.912267	2.19154	2.86305	1.31115	2.28686	10.2323	0.0446934	0.00191172	0.131463	3.22711	3.16042
PRICKLE1	5.32123	9.87458	0.000351801	0.670463	1.63928	3.38135	2.22647	3.97723	16.2611	0.00105231	0.0711344	0.233064	3.64763	3.49553
CASK	5.27822	8.58592	0.000593518	0.412766	1.04001	2.63412	1.90773	4.96195	14.5412	0.000186736	0.135723	0.341119	3.38027	3.14185
ZBTB46	5.2746	13.0195	0.000149576	0.796279	1.90077	2.28651	0.937982	2.34476	16.6893	0.0316857	0.0110442	0.212249	3.16005	3.0484
ITGA3	5.24796	10.8644	0.000284888	0.451394	1.10524	5.05605	4.27773	6.0784	13.0733	3.82135e-05	0.116072	0.243962	3.88978	3.70976
PAPPA	5.24663	10.8989	0.000282494	1.48149	3.62693	1.36111	-1.1931	2.55205	16.8924	0.020693	0.0520423	0.550009	2.29431	1.99328
CDH24	5.23051	9.97994	0.000386546	0.666493	1.65621	2.80542	1.64407	3.25381	13.5292	0.00599828	0.0468927	0.230021	3.00606	2.86761
LNPEP	5.22173	9.43263	0.000470452	0.554279	1.39128	4.52208	3.5493	2.40267	12.5263	0.0325726	0.00572398	0.11184	3.48263	3.42385
ZNF385A	5.20853	10.7804	0.00031037	0.711264	1.7568	0.060215	-1.17382	2.2905	17.0923	0.0349705	0.00496542	0.120324	2.70136	2.63872
TMEM173	5.20709	9.38092	0.000488686	0.711902	1.79375	4.95143	3.6986	5.55944	13.2545	8.60133e-05	0.133602	0.302889	3.75353	3.53528
ZNF37BP	5.19537	10.8768	0.000307648	0.482216	1.19281	2.20089	1.36338	2.3402	16.2044	0.0323818	0.00759349	0.152165	2.53094	2.45106
MROH6	5.18747	13.7209	0.000146924	0.804562	1.94253	-0.40868	-1.78223	2.7905	14.6076	0.013992	0.0241584	0.181982	2.01862	1.91555
TPCN1	5.18613	11.5523	0.00025676	0.41069	1.01023	3.16504	2.45458	4.84562	17.9502	0.00013079	0.103796	0.262754	3.16359	2.98032
TCF7L2	5.1783	11.4722	0.000265912	0.683662	1.6857	2.0032	0.818522	2.61821	11.4612	0.0232032	0.0132072	0.148386	3.02096	2.94016
EPHB4	5.16279	12.3755	0.000213738	0.458354	1.12383	6.70556	5.91446	7.47382	15.4549	1.64042e-06	0.154544	0.277421	4.55859	4.3426
SIK3	5.13607	9.36195	0.000542565	0.483566	1.23689	3.06008	2.19985	2.83354	11.5071	0.0156339	0.0157586	0.122843	3.13912	3.06982
INSIG1	5.13355	15.9402	0.000101242	0.794915	1.91384	4.48336	3.12898	6.25674	17.0173	8.644e-06	0.173406	0.349832	3.16705	2.90543
PALM	5.13243	12.9676	0.000194024	0.702752	1.72485	3.98245	2.76864	8.1475	16.9012	2.96431e-07	0.253007	0.429935	4.17299	3.83152
PROCR	5.12649	9.43075	0.000537266	0.513473	1.31453	6.35288	5.43888	3.23174	15.5105	0.0053917	0.0760521	0.368244	4.13386	3.91171
SYNJ1	5.1236	10.8264	0.000348739	0.594462	1.49291	2.38796	1.34428	5.41969	14.2253	8.54447e-05	0.0756577	0.174513	3.1322	3.00712
SGMS1	5.11839	15.002	0.00012596	0.339705	0.824515	2.80074	2.21863	3.01309	13.782	0.00944438	0.0262367	0.156521	3.03289	2.94151
JAK2	5.11784	13.319	0.000182973	0.478028	1.17348	2.15974	1.33398	2.28383	14.0599	0.0384391	0.00377394	0.119442	2.82102	2.75941
ABCG1	5.0978	19.7631	5.68812e-05	0.859973	2.05274	2.9169	1.46054	3.28517	17.979	0.00411871	0.0397039	0.18061	3.27464	3.16449
TBC1D10A	5.09507	8.88471	0.000676052	0.553704	1.44116	1.18757	0.19014	2.67576	13.1174	0.0189328	0.0157746	0.147396	2.48077	2.39919
SPTBN1	5.08658	9.88973	0.000489873	0.493051	1.26379	8.14631	7.26789	6.53304	15.5113	8.03353e-06	0.0969371	0.190421	4.71427	4.57059
ATP8B2	5.05328	7.97848	0.000993333	0.369693	0.990852	5.30149	4.62122	8.82289	12.3533	1.10049e-06	0.163788	0.27076	3.93423	3.71696
IQCE	5.02681	7.94176	0.00104089	0.525691	1.41889	2.7381	1.76581	4.04062	12.4696	0.00151895	0.0517584	0.171812	3.14973	3.03795
OMA1	5.02048	8.99194	0.000720578	0.822104	2.17089	0.835023	-0.661473	2.20631	15.0801	0.0432807	0.00370998	0.212124	2.10752	1.99961
PXK	5.00139	9.61283	0.000604369	0.393226	1.03137	2.50259	1.79029	2.87962	14.4015	0.0118415	0.0241301	0.163559	2.97076	2.87691
ISCU	4.99363	12.4192	0.000281897	0.304542	0.772893	3.65045	3.11174	2.61344	11.2763	0.0236791	0.00844334	0.0968791	3.2786	3.22594
BCL9L	4.98603	10.3072	0.000500698	0.593216	1.5448	3.4389	2.3699	2.9666	17.8534	0.00831695	0.0321637	0.188595	3.68998	3.57961
CTSH	4.98557	9.83325	0.000577424	1.32122	3.46534	2.05793	-0.335346	4.51701	16.2722	0.000337299	0.335669	0.927857	2.65484	2.02307
NPAS2	4.97688	10.679	0.000456359	0.686476	1.78228	4.4225	3.18813	2.47866	17.3471	0.0237355	0.0201606	0.248463	3.68785	3.55354
SRSF8	4.9642	8.86113	0.000812856	0.412318	1.10575	3.22873	2.46969	4.26241	10.8015	0.00139316	0.0684791	0.215391	3.41911	3.27718
KRAS	4.94843	9.34681	0.000708838	0.513693	1.36995	3.10902	2.16721	2.92279	13.1033	0.0117933	0.0179966	0.119674	3.46014	3.3913
ISYNA1	4.85806	8.32534	0.00112327	0.588842	1.63937	3.44075	2.32664	4.08532	12.6309	0.001364	0.123733	0.403225	3.45229	3.18881
CPNE8	4.82544	10.1188	0.000673521	0.517966	1.40404	2.31995	1.35894	9.11261	11.2779	1.54294e-06	0.217634	0.355697	3.19301	2.90634
SP1	4.81847	7.93216	0.00135608	0.349926	0.994104	4.89366	4.22165	3.56848	11.7639	0.00397996	0.0302691	0.12573	3.6445	3.5665
IFI27	4.7896	11.226	0.000531534	1.24414	3.35023	5.24108	2.9439	3.34964	12.8429	0.00530472	0.0680925	0.316349	3.48271	3.29049
ARNTL	4.77716	8.87235	0.00104616	0.435043	1.22093	1.5062	0.678211	4.4856	14.6674	0.000459333	0.057194	0.161152	2.63415	2.52497
CADPS2	4.75783	10.1152	0.000746969	0.420255	1.15843	3.85979	3.07045	4.69316	10.8817	0.000676826	0.0765358	0.212061	3.39587	3.25157
PPM1D	4.75027	7.50355	0.00172275	0.658018	1.928	3.63036	2.33735	7.29095	11.4584	1.24364e-05	0.129333	0.240407	3.34775	3.16288
CRBN	4.74357	7.43074	0.00178387	0.592672	1.74387	3.37418	2.20591	4.58507	15.1817	0.000346945	0.0640604	0.175142	3.23503	3.11543
AHDC1	4.71914	9.53794	0.000930358	0.62066	1.74496	3.13562	1.95281	2.16201	13.3699	0.0492958	0.000214135	0.120016	3.47618	3.41606
LMBRD2	4.70274	13.0178	0.000411663	0.567207	1.53092	1.99748	0.948414	3.1013	15.0347	0.00728139	0.0298081	0.160742	2.77679	2.68151
TAP1	4.63827	13.298	0.000437834	0.451514	1.23548	2.72445	1.88095	2.48479	13.4839	0.0267895	0.0140921	0.196674	3.09472	2.98934
DUSP3	4.62181	12.7848	0.000499382	0.208286	0.575084	4.3732	3.98152	4.33518	12.0282	0.000964636	0.0473438	0.142967	3.78597	3.69081
GSDMB	4.61469	9.29997	0.00115951	0.435218	1.26421	0.693725	-0.155991	3.04633	17.8385	0.0070009	0.0581155	0.316949	2.1685	1.98097
RIN3	4.61299	9.71767	0.00103577	0.622009	1.7932	1.95664	0.749041	2.83559	17.5217	0.0111741	0.0216329	0.146301	3.29828	3.21432
PLEKHM1P1	4.59729	10.1674	0.000942566	0.601195	1.72714	2.53212	1.36795	4.23591	17.9641	0.000498929	0.0621013	0.184357	2.58375	2.46052
SNCG	4.59189	19.3585	0.000190555	0.307033	0.820185	2.37563	1.81202	7.69477	15.92	9.4529e-07	0.272209	0.479346	3.2183	2.84252
SLC8B1	4.57344	10.9277	0.000812484	0.408428	1.16742	3.40953	2.62161	4.95126	9.44839	0.000683686	0.081655	0.217229	3.21467	3.06522
GDF3	4.50107	21.4446	0.000187424	1.27209	3.452	-0.156113	-2.51816	4.72753	17.7696	0.00017362	0.290135	0.755047	3.59832	3.07573
CCDC66	4.49045	10.946	0.000926722	0.364858	1.0672	1.7165	1.00047	2.50642	8.67183	0.0344286	0.00749264	0.155	2.54852	2.46727
ARHGEF3	4.4818	16.5198	0.000350597	0.560754	1.56249	3.45718	2.39555	4.78968	17.7916	0.000151217	0.128594	0.329854	3.31638	3.08715
SDSL	4.4591	10.6438	0.00104489	0.739348	2.19234	0.014015	-1.45183	3.27173	17.8895	0.00426434	0.0599181	0.275222	2.04242	1.87485
LRRC37B	4.44844	14.3448	0.00052053	0.346442	0.988746	0.671042	0.00344778	3.96909	17.3404	0.000958391	0.0601799	0.196324	2.40169	2.27343
C2CD5	4.43411	19.0383	0.000283522	0.313366	0.873545	2.69758	2.10412	2.40001	8.5612	0.0412352	0.00346818	0.135198	3.07117	3.00184
POGLUT1	4.42284	9.59299	0.00142505	0.439738	1.34308	2.6822	1.79079	4.56533	16.647	0.000288752	0.0842963	0.22959	3.15799	3.00105
MALAT1	4.40261	10.4103	0.00120743	0.828303	2.50762	9.95676	8.2888	4.21238	17.7993	0.000535176	0.0775535	0.232136	4.43537	4.28053
DIRC2	4.39549	15.5881	0.000478458	0.242989	0.697604	1.69408	1.22378	2.95225	10.2927	0.0140598	0.0229398	0.16193	2.85082	2.75839
CLSTN3	4.39009	21.7121	0.000238912	0.797277	2.22708	4.43484	2.92266	3.0601	17.9735	0.00675074	0.042691	0.22977	3.71777	3.58154
TTC7A	4.3819	10.1277	0.00133247	0.396569	1.21425	2.69071	1.8853	3.82154	12.699	0.00220558	0.0624558	0.225809	2.90528	2.76115
NOSTRIN	4.37269	13.2524	0.000722197	0.87887	2.58879	-0.492974	-2.2268	4.51916	11.4073	0.000797322	0.302848	0.873081	1.12405	0.536087
NEK1	4.36041	8.62237	0.0020177	0.387332	1.23425	2.01558	1.20479	2.8014	16.2934	0.0126396	0.0188017	0.135075	2.90986	2.83292
LINC00674	4.3393	8.27626	0.00228977	0.583161	1.8897	0.456796	-0.779634	2.20716	17.6158	0.040827	0.00284913	0.119323	2.40334	2.34225
C1orf21	4.32257	14.7261	0.000628489	0.634766	1.87368	3.31232	2.05809	3.86922	15.1044	0.0014958	0.111357	0.384159	3.62497	3.37721
HCFC2	4.31171	9.14779	0.0018841	0.401008	1.28165	2.43057	1.58924	2.43147	8.80506	0.0384569	0.0056454	0.164185	2.97308	2.88817
PHOSPHO1	4.30399	7.60777	0.00292449	1.38697	4.6516	1.59457	-1.42472	3.01176	14.3525	0.00911921	0.0507286	0.299728	1.13527	0.960042
SPATA13	4.28348	14.239	0.000730204	0.348544	1.04542	2.32123	1.62425	5.28709	17.524	5.46604e-05	0.166123	0.385913	3.0164	2.74038
MFSD13A	4.27683	19.4943	0.00038719	0.308136	0.896808	0.248592	-0.35388	3.56338	10.9683	0.0044661	0.0463496	0.196247	2.29021	2.16891
HCN3	4.24542	10.3317	0.00158207	0.501201	1.59833	-0.656794	-1.70656	3.33645	15.1055	0.00447213	0.0460501	0.208686	1.96757	1.8402
NADK	4.24439	7.82183	0.00296855	0.190356	0.647238	4.03204	3.61324	3.39878	12.3267	0.00509645	0.0251622	0.114309	3.56345	3.49371
CTTNBP2NL	4.24172	8.30743	0.00259904	0.299986	1.00477	4.9795	4.32712	4.2929	9.74718	0.00167438	0.0471364	0.149618	3.84561	3.74723
ZFHX2	4.24069	13.4228	0.000899882	0.724962	2.22091	0.533285	-0.939651	3.07731	14.7414	0.00779263	0.035964	0.198859	2.61311	2.49569
B3GNT8	4.23664	19.4894	0.000425043	0.351538	1.03572	0.396552	-0.297078	4.93818	17.3336	0.000118056	0.111025	0.27624	2.66833	2.4747
RAB29	4.23387	14.2102	0.000808087	0.279184	0.850831	2.74353	2.17852	3.35873	13.4314	0.00492799	0.0392835	0.179637	3.40366	3.2942
MDGA1	4.17881	14.7846	0.000830587	0.784202	2.42126	-0.480866	-2.0836	3.92494	16.6588	0.00112876	0.127874	0.426148	2.23828	1.96127
AC015813.6	4.17483	13.8776	0.000952181	0.305731	0.952855	0.268769	-0.360524	3.13511	15.0771	0.00677579	0.0277881	0.14565	2.3643	2.27758
RGS2	4.17407	9.62126	0.0020722	1.07399	3.56193	2.87869	0.560729	2.14653	17.3108	0.0462806	0.00332501	0.357139	2.12364	1.94341
CAMLG	4.17134	10.2425	0.00181731	0.369096	1.20974	2.76232	1.97291	2.34543	14.8966	0.0332766	0.00588201	0.123841	3.27716	3.2123
DMXL2	4.14999	9.14785	0.00239838	0.350359	1.18549	2.57037	1.80245	2.40793	17.8027	0.0271146	0.00773088	0.114204	2.92214	2.86117
NLRP1	4.13886	11.3304	0.00154805	0.40155	1.30681	5.09633	4.24216	2.19065	11.6056	0.0496822	6.9303e-05	0.0844293	3.52254	3.48029
C12orf66	4.13828	16.3018	0.000744742	0.347053	1.07383	0.0926051	-0.617839	2.98473	10.8915	0.0125395	0.0302311	0.200816	2.15315	2.03763
VGLL4	4.13394	21.9209	0.000437733	0.322771	0.972915	3.66621	3.01837	2.74208	17.9993	0.0133969	0.0295936	0.223537	3.87311	3.74654
LPCAT4	4.12071	11.7037	0.00149375	0.486029	1.58322	3.43769	2.40307	9.59351	15.3933	6.86073e-08	0.252793	0.396796	3.22127	2.89647
NFAT5	4.09777	9.67541	0.00230613	0.462787	1.57694	4.82189	3.80203	5.95306	17.4965	1.39588e-05	0.111945	0.234443	3.86105	3.68785
PCGF2	4.08879	11.5384	0.00162647	0.456194	1.50698	3.04138	2.05979	5.28029	11.4062	0.00023048	0.0842925	0.2039	3.7728	3.6287
STXBP1	4.07901	10.8032	0.00189181	0.514598	1.72664	3.10668	1.98607	4.43803	16.4451	0.000388439	0.0677141	0.191043	3.35094	3.22157
RPAP2	4.07633	12.4554	0.0014259	0.181499	0.594707	2.00414	1.61604	2.33625	14.3494	0.0344631	0.00572664	0.130546	2.93141	2.86327
CYB5RL	4.05536	8.09235	0.00357023	0.302412	1.09604	1.23315	0.53393	2.35865	12.2948	0.0356781	0.00624657	0.152507	2.52335	2.44397
VEGFA	4.04418	7.61793	0.00411255	0.698016	2.58847	3.88682	2.24358	3.61824	16.8656	0.00214632	0.0745896	0.28355	3.2235	3.04443
GABPA	4.0339	11.0677	0.00194492	0.335328	1.13934	2.03275	1.29542	3.04108	15.0268	0.00823861	0.0242004	0.137554	3.00049	2.91962
RFX1	3.99831	10.7781	0.00217755	0.382755	1.32546	1.48292	0.628817	3.38683	17.7539	0.0033372	0.0288731	0.123467	3.04772	2.97155
CCDC159	3.98298	10.4761	0.0023623	0.542507	1.90115	1.55903	0.337197	2.5865	16.7799	0.0193484	0.0152102	0.150585	2.52572	2.44283
SOX13	3.9824	8.31307	0.00374629	0.359462	1.33322	3.73906	2.89272	4.69093	17.2352	0.00020303	0.114811	0.30215	3.46464	3.25616
ANKRD33B	3.98129	9.90649	0.00264411	0.52442	1.86131	2.37726	1.1844	7.93801	17.9767	2.76193e-07	0.22032	0.378937	3.06803	2.7684
PLEC	3.96679	9.75708	0.00278836	0.401899	1.43998	7.79266	6.87172	4.4099	17.2561	0.000370577	0.111138	0.314586	4.43979	4.22692
PTHLH	3.95466	10.1726	0.00262118	1.15252	4.11167	1.0507	-1.5814	10.4503	14.1112	5.00991e-08	0.697407	1.05727	2.68017	1.80283
AP1G2	3.94837	8.65716	0.00363058	0.402766	1.49892	2.28675	1.3359	3.71485	17.9186	0.00159561	0.0668814	0.241137	2.89536	2.74136
GABBR1	3.92773	9.0455	0.00343611	0.440657	1.63548	3.10761	2.06954	2.35683	17.9595	0.029988	0.00777379	0.135605	2.90605	2.83436
DNHD1	3.92111	8.98502	0.00351639	0.436049	1.62596	1.63564	0.604634	3.17193	13.7542	0.00691851	0.0556257	0.289139	2.12926	1.95688
NHSL2	3.87485	10.8876	0.00263539	0.235828	0.857828	5.12915	4.58232	3.56763	17.9988	0.0022002	0.0549286	0.212291	3.78741	3.6538
SHE	3.86084	12.0887	0.00223565	0.166588	0.597364	4.7724	4.39042	3.08994	15.0051	0.00746664	0.0319294	0.173922	3.9182	3.81527
C14orf93	3.83945	19.0879	0.0010979	0.341152	1.15831	0.469876	-0.279854	2.41397	12.6712	0.0316964	0.0078121	0.144337	2.24101	2.16493
MAP3K12	3.83807	10.5394	0.0029767	0.313376	1.16668	3.53754	2.79751	3.47897	14.7278	0.0034471	0.0404529	0.16896	3.1923	3.08759
LAT2	3.77231	8.60863	0.00476804	0.74427	3.0133	0.180934	-1.69785	3.98593	16.4882	0.00100822	0.10565	0.344471	1.41565	1.19059
GSN	3.76586	20.9129	0.00114215	0.400163	1.38775	5.45713	4.56318	2.54478	16.5043	0.0212674	0.0214458	0.232316	4.24467	4.11779
SIRT5	3.7426	11.7784	0.00289732	0.263746	1.00238	1.40019	0.767126	2.35284	12.9206	0.0351492	0.00614937	0.145259	2.67297	2.59727
ZNF326	3.72825	11.6988	0.00300702	0.252739	0.968456	2.14626	1.53567	3.35739	12.6015	0.00535415	0.0382692	0.177661	3.18256	3.07459
CROT	3.71406	21.2897	0.00126137	0.317776	1.12491	0.806821	0.0854784	3.29523	16.7369	0.0043462	0.0632114	0.288973	3.08753	2.91144
ISG20	3.69328	15.1663	0.00213308	0.458411	1.70679	1.18232	0.0997244	2.68238	17.9923	0.0152136	0.0523061	0.430341	2.50812	2.2668
SLC12A7	3.68393	11.2982	0.0034467	0.243842	0.961913	3.37958	2.7767	2.34924	16.023	0.0319637	0.00607526	0.118259	3.58813	3.52596
TBC1D2	3.6769	19.7368	0.00152208	0.453311	1.64439	1.77724	0.728389	13.279	17.2824	1.68837e-10	0.385713	0.531217	2.74756	2.28909
DNM3OS	3.66823	10.6604	0.00389563	0.551311	2.22156	0.579235	-0.807199	5.29537	17.0271	5.90382e-05	0.202344	0.470318	2.22964	1.89331
ALDH3A2	3.65922	14.0309	0.00256877	0.171935	0.658689	2.83051	2.4152	2.4943	9.88222	0.0320135	0.00733146	0.131969	2.98229	2.91264
HIBCH	3.65436	16.2303	0.00209568	0.180448	0.677672	1.41808	0.98902	2.43044	12.7821	0.0305908	0.00896568	0.154672	2.74852	2.6667
SLC25A37	3.63638	7.176	0.00797797	0.634721	2.96193	5.59711	3.79878	2.96409	17.9277	0.00833516	0.0235144	0.138095	3.35644	3.27563
FBF1	3.62441	11.6023	0.00367391	0.247515	1.0008	-0.0449419	-0.669101	2.79317	13.8641	0.01448	0.0221569	0.169324	1.87799	1.78225
WNK1	3.61579	7.56018	0.00750749	0.42457	1.96251	6.1656	4.97206	5.25574	15.0948	9.48911e-05	0.0623351	0.147309	4.10278	3.99796
DLG4	3.57167	14.0046	0.00306468	0.224029	0.897464	2.75767	2.19693	3.5151	12.8382	0.00387004	0.0268172	0.112632	3.3072	3.23748
DNAJC21	3.56353	13.8777	0.00315509	0.16515	0.665521	3.08083	2.6655	2.31265	10.7869	0.0415401	0.00218332	0.0927714	3.24247	3.195
PTPN12	3.51689	16.2226	0.00280887	0.352283	1.41846	3.88826	3.00289	2.80882	14.6351	0.0134698	0.0206806	0.152012	3.86831	3.78196
SYTL4	3.50859	9.71178	0.00590115	0.225443	1.01878	3.15471	2.5326	4.25721	15.6824	0.000627568	0.0967329	0.289254	3.31729	3.12429
PRKAA2	3.50575	16.7294	0.00276554	0.519152	2.09332	1.70579	0.39956	5.58379	17.7895	2.78942e-05	0.156482	0.345525	2.75137	2.50036
NR2F2	3.50569	10.7635	0.00508122	0.436843	1.9214	5.28633	4.10721	4.94729	15.7942	0.000151098	0.0912902	0.228438	4.45834	4.29847
CHN1	3.49959	15.3742	0.00312355	0.124124	0.508789	2.09153	1.77508	3.86818	11.375	0.00246137	0.0504437	0.182401	3.04529	2.92887
ULK1	3.47224	11.0532	0.00518324	0.346321	1.54361	3.24685	2.30188	2.25015	17.5643	0.037516	0.00446351	0.133609	3.54615	3.47712
SMIM10	3.43699	20.1543	0.00258684	0.433932	1.77223	-0.279462	-1.38254	2.84511	15.4292	0.0120241	0.0422436	0.292164	1.57841	1.4112
IL18BP	3.43437	12.0619	0.00491098	0.278521	1.24367	2.12842	1.36732	4.11271	13.8123	0.0010842	0.0969573	0.308865	2.56935	2.36643
RIN1	3.42143	9.25735	0.00730278	0.241702	1.17334	1.7545	1.04698	5.69831	15.6661	3.57321e-05	0.167571	0.366664	2.72594	2.45882
FAM124A	3.42031	10.1636	0.00639411	0.418549	1.97332	3.3082	2.11226	2.92095	11.5161	0.0133199	0.0352686	0.246225	3.04608	2.90533
FBXW7	3.41085	13.7931	0.00430175	0.171215	0.753517	3.00736	2.545	3.12655	11.2226	0.00942171	0.0240884	0.137723	3.17777	3.09687
CARD10	3.39159	12.2724	0.00519559	0.237819	1.08648	3.9725	3.31035	4.17911	17.9348	0.000567706	0.0649115	0.196224	3.67603	3.54546
AC083843.3	3.36451	10.7763	0.00649029	0.279104	1.34283	-0.0227684	-0.833736	2.69936	8.32645	0.0261451	0.0339874	0.414644	0.793853	0.569538
OSBPL1A	3.35444	15.3391	0.00423233	0.183844	0.82129	1.51968	1.01711	4.09502	14.0243	0.00108902	0.0607108	0.1942	2.90271	2.77525
GDPD5	3.35117	15.2662	0.00428493	0.284208	1.27338	3.97657	3.19778	2.30446	16.6944	0.034332	0.00825767	0.190274	3.69806	3.59879
NOVA2	3.30965	10.7698	0.00715123	0.290176	1.45136	3.6986	2.82783	2.19155	16.2348	0.0433253	0.00176468	0.102566	3.68663	3.63447
AC093297.2	3.30942	12.7426	0.0057841	0.380119	1.81797	-0.423819	-1.52286	4.59618	15.6529	0.00031462	0.192722	0.523803	1.7316	1.37334
UGP2	3.30179	11.4771	0.00668367	0.205107	1.01301	4.09152	3.48246	3.94179	17.867	0.000967926	0.0622758	0.204585	3.58035	3.44691
CGNL1	3.27564	8.9015	0.00973851	0.381978	2.09652	5.31568	4.07643	6.49028	15.7499	8.04809e-06	0.112207	0.22127	3.99811	3.83137
GUK1	3.25099	8.4545	0.0108455	0.173139	0.991759	5.36052	4.77807	2.85826	13.8458	0.0127569	0.0163026	0.11473	3.84092	3.7754
VANGL1	3.24712	10.4366	0.00830164	0.120286	0.636986	3.47862	3.09998	5.55244	10.908	0.000177476	0.0869767	0.201412	3.51466	3.37047
AHNAK2	3.21773	7.94491	0.0123942	0.22987	1.39766	5.87312	5.05936	4.65388	16.6161	0.000240771	0.103996	0.277044	4.02084	3.83032
HSD17B12	3.15523	9.18134	0.011357	0.277083	1.66601	3.51195	2.5404	3.97585	15.6752	0.0011258	0.0632409	0.208235	3.44315	3.30741
TUBE1	3.15046	14.6416	0.00676445	0.160426	0.835998	1.58328	1.08507	3.68071	12.6889	0.00287757	0.0513041	0.197993	2.49574	2.37109
C11orf71	3.14264	14.6044	0.00689034	0.221731	1.16339	-0.937225	-1.62979	2.23475	15.626	0.0404147	0.00383322	0.150909	2.10859	2.03121
LRRC28	3.13244	9.08712	0.011934	0.165794	1.02319	1.082	0.48751	2.62943	15.6702	0.0184486	0.0107531	0.101027	2.71688	2.66099
ZNF182	3.10606	12.278	0.0088669	0.124869	0.7068	-0.0168805	-0.432715	2.22423	17.0819	0.0399004	0.00358132	0.134732	2.43281	2.36366
ZNRD1ASP	3.08275	8.52277	0.0139515	0.175306	1.17384	0.522724	-0.15185	2.78481	17.553	0.0124335	0.0252964	0.181882	1.96396	1.86038
AC087481.3	3.08066	9.55745	0.0122429	0.163813	1.03995	0.404155	-0.197729	2.31171	12.3366	0.0388112	0.00444985	0.143062	2.02632	1.95256
SGMS2	3.01548	18.5729	0.00724404	0.212835	1.1836	3.65232	2.9541	3.3352	17.8951	0.0037068	0.0633111	0.279086	3.26231	3.09111
PML	2.99111	11.1996	0.0120516	0.134121	0.875236	3.71088	3.2062	2.60664	16.739	0.0185881	0.0144274	0.13773	3.63714	3.56106
DNAJC1	2.98768	15.8976	0.00874801	0.118073	0.696002	2.54222	2.13518	2.90999	16.7907	0.00984742	0.0180248	0.113406	3.09567	3.02996
F2RL3	2.93846	14.8779	0.0102396	0.440319	2.7723	0.0822432	-1.52406	3.62837	11.5489	0.0036743	0.0921455	0.372187	2.41523	2.18307
SEC11C	2.93244	20.2418	0.00816457	0.153782	0.909699	1.27643	0.744685	3.86005	16.4295	0.00132707	0.0726674	0.248889	2.68367	2.52289
PARD6A	2.92724	20.3527	0.0082289	0.175222	1.04081	-0.442904	-1.05092	2.71255	17.5651	0.0144827	0.0370236	0.293392	2.20468	2.03948
ZC3H8	2.91495	13.4143	0.0117284	0.155548	1.03554	0.635811	0.0402687	2.87955	12.2967	0.0135453	0.0284282	0.20329	2.24906	2.1332
ELMO2	2.90027	12.0232	0.0132963	0.0578713	0.407116	2.77757	2.54507	3.05491	11.1829	0.0107602	0.0196089	0.119977	3.20234	3.13254
ANKRD26	2.88818	9.69502	0.0166543	0.101839	0.802469	1.99999	1.54784	2.18736	12.085	0.0490894	0.000237668	0.101297	2.93133	2.88056
STAG3L5P	2.87539	9.46269	0.0174268	0.222178	1.80598	0.344571	-0.669508	2.66088	17.9994	0.0159186	0.0272121	0.231408	2.01828	1.88897
CCDC68	2.83149	9.24409	0.0191748	0.317685	2.79266	0.51029	-1.04488	5.65809	9.5852	0.000245938	0.294247	0.680274	1.99651	1.50925
CDC42EP4	2.80533	12.6672	0.0151927	0.100603	0.782484	2.7758	2.33426	2.92588	17.9973	0.00902697	0.029674	0.180821	3.11472	3.00947
CLK4	2.79929	10.0395	0.0187507	0.119393	1.0485	1.93377	1.34983	3.22164	10.7428	0.00837315	0.0484024	0.259098	2.73254	2.57879
SH3BGRL2	2.76946	21.8982	0.0112133	0.142778	0.995072	3.24231	2.67338	2.28832	17.4288	0.034858	0.00742901	0.178922	3.24247	3.1493
ITPRIP	2.76529	13.6947	0.015435	0.0978284	0.780479	3.81607	3.37692	6.21359	17.9285	7.43039e-06	0.197812	0.4	4.23838	3.93948
ZNF546	2.74928	8.24617	0.024384	0.153477	1.70043	0.395184	-0.53177	3.08925	14.5439	0.00770681	0.0391556	0.214976	2.17176	2.04469
DOK4	2.71945	12.2645	0.0183172	0.0700896	0.628305	2.88713	2.53793	4.31779	15.3762	0.000577833	0.0805522	0.236953	3.24046	3.08171
ZFP36L1	2.71679	13.0109	0.0176094	0.133488	1.16961	4.22916	3.57761	3.75963	13.541	0.00222975	0.0664697	0.244353	3.97755	3.82214
KAT2A	2.67075	9.92806	0.0235993	0.110322	1.22768	3.18371	2.51471	3.67825	17.912	0.00173174	0.0497939	0.182549	3.2375	3.12133
ANK1	2.66952	8.36283	0.0273032	0.409952	5.33753	-0.0931362	-2.96688	4.0513	15.7535	0.000953481	0.213427	0.683197	2.16883	1.72052
UNC13D	2.63031	11.2486	0.0230121	0.164932	1.82855	1.64183	0.64509	4.53915	17.9884	0.000254479	0.173219	0.471757	2.34907	2.02658
SLK	2.62775	10.54	0.0242636	0.0581071	0.677765	4.69061	4.32268	5.56102	17.9947	2.80624e-05	0.105246	0.233059	3.7189	3.54975
PDLIM4	2.61217	7.86819	0.0314624	0.0749739	1.23316	4.35013	3.69607	4.96298	17.9101	0.000102034	0.0972705	0.240165	3.56801	3.39929
PREPL	2.58263	10.8727	0.0256821	0.050286	0.635959	2.99125	2.64813	2.16511	15.1177	0.0467768	0.00120333	0.147236	3.34552	3.2713
COBLL1	2.58022	18.2308	0.0187406	0.145005	1.41004	3.70755	2.93002	6.59035	13.8026	1.29625e-05	0.13581	0.267116	3.29224	3.09078
MOK	2.56662	9.69477	0.0287	0.0797323	1.16453	0.0501993	-0.57193	2.65	16.7372	0.0169979	0.0248892	0.220458	2.14864	2.02596
TTLL11	2.55055	8.52762	0.0324778	0.0650983	1.16869	0.00488571	-0.612009	4.22973	13.3557	0.000928602	0.0625867	0.192546	2.41318	2.28561
SLC5A3	2.52569	11.6059	0.0272088	0.0494281	0.687864	2.45086	2.08222	5.13582	11.3522	0.000294315	0.31797	0.791755	3.54098	2.98611
GBP3	2.49523	12.6788	0.0272319	0.157135	2.22431	2.73731	1.54658	2.82306	11.1355	0.0163988	0.0145391	0.116734	3.00849	2.94286
KRT8P12	2.49147	9.05044	0.0342023	0.0500658	1.0288	-0.592659	-1.13209	3.32631	15.1504	0.00455081	0.0374168	0.170589	2.00768	1.90368
SHANK3	2.45905	8.73974	0.0369627	0.0593067	1.50394	5.57674	4.79512	2.38873	13.6704	0.0319252	0.00718051	0.136303	4.32415	4.25241
EMP3	2.40943	8.35569	0.0412902	0.039806	1.5533	3.70562	2.90907	7.84147	14.1883	1.58388e-06	0.219455	0.384421	3.42955	3.12761
CARHSP1	2.31191	8.62857	0.0472747	0.0055769	0.73488	3.06665	2.69642	3.473	16.4946	0.00302003	0.0638799	0.262798	3.46808	3.30474
TSC2	2.2973	9.01369	0.0471658	0.00731699	0.935383	4.51011	4.03876	4.30672	17.9984	0.000424799	0.0547507	0.159047	3.73143	3.62453
PGAP1	2.29726	11.7532	0.0408206	0.0366746	1.44976	1.89146	1.14824	2.43331	15.4591	0.0275225	0.0102067	0.151404	3.11401	3.03321
OGDH	2.29301	10.6319	0.0433224	0.0091817	0.50005	4.34071	4.0861	4.52496	14.8442	0.000413008	0.0647907	0.180384	3.62885	3.50626
TAF8	2.28955	13.1569	0.0391949	0.012644	0.426661	2.83177	2.61211	2.87886	11.3414	0.0145852	0.012709	0.0939701	3.08065	3.02731
SESN3	2.28586	11.338	0.0424264	0.0422003	2.03563	3.53873	2.49981	2.3541	16.4396	0.0313027	0.0147719	0.27648	3.99435	3.84872
HAPLN1	2.27916	21.5344	0.0329438	0.22556	4.84711	0.61365	-1.92269	2.51084	11.5594	0.0280241	0.0679014	0.988484	1.90603	1.37784
FLVCR2	2.27338	15.1592	0.0379657	0.0602089	1.8425	-1.26833	-2.21969	2.36642	17.3282	0.0298532	0.0172217	0.296701	2.21088	2.05392
SH3KBP1	2.26963	13.7014	0.0399378	0.0223978	0.821658	1.8736	1.45158	3.26272	17.0706	0.00456463	0.0388162	0.180757	3.14357	3.03378
TRIM2	2.26244	12.0957	0.0428587	0.017001	0.88238	1.72137	1.27168	2.93107	17.62	0.00907167	0.0418058	0.25457	3.02672	2.87853
SPSB2	2.20307	10.9209	0.049988	2.63786e-05	0.844848	0.581511	0.159074	3.30257	10.5642	0.00742398	0.0682193	0.345	2.32305	2.11644

## Sheet: both.down
	cord.statistic.t	cord.parameter.df	cord.p.value	cord.conf.int1	cord.conf.int2	cord.estimate.mean.of.x	cord.estimate.mean.of.y	flow.statistic.t	flow.parameter.df	flow.p.value	flow.conf.int1	flow.conf.int2	flow.estimate.mean.of.x	flow.estimate.mean.of.y
SMS	-26.6164	11.3057	1.48436e-11	-2.79517	-2.36949	1.18306	3.76538	-4.89299	17.6616	0.000123388	-0.271057	-0.108053	3.14269	3.33224
VEPH1	-25.1437	8.11963	5.4342e-09	-6.35382	-5.28877	-1.30026	4.52104	-2.57816	17.7959	0.019064	-0.150706	-0.0153097	3.53185	3.61486
HMGA2	-23.5719	18.2698	3.9404e-15	-4.56069	-3.81497	0.364221	4.55205	-2.3657	18	0.0294225	-0.22936	-0.0135963	3.49748	3.61895
LINC01013	-21.906	11.5406	9.21956e-11	-6.86274	-5.61607	-3.38197	2.85744	-4.82122	17.5075	0.000147432	-0.538746	-0.211259	2.89695	3.27195
FEN1	-21.5465	17.8895	3.02566e-14	-4.31453	-3.54758	-0.643652	3.2874	-2.52903	17.4013	0.0213629	-0.290282	-0.0264857	2.71405	2.87244
FJX1	-21.4452	19.1827	7.22704e-15	-1.8952	-1.55835	0.978018	2.70479	-6.38332	17.135	6.55389e-06	-0.315417	-0.158779	2.83893	3.07602
CDCA7L	-20.9291	9.02253	5.87722e-09	-3.83963	-3.09082	0.289037	3.75426	-13.5869	9.43358	1.6515e-07	-0.32197	-0.230609	3.22924	3.50553
UHRF1	-20.8278	12.0995	7.58538e-11	-5.43521	-4.40659	-1.84857	3.07233	-2.30488	15.113	0.0357669	-0.323337	-0.0127456	2.49335	2.66139
HMGA1	-20.6616	10.9029	4.31638e-10	-4.96756	-4.01017	2.82911	7.31798	-2.33535	17.9657	0.0313247	-0.200051	-0.0105575	4.40429	4.50959
C19orf48	-20.4997	14.8663	2.6018e-12	-2.51007	-2.03693	1.76495	4.03846	-3.17874	13.9461	0.00672546	-0.164088	-0.0318412	3.05707	3.15504
MAP4K4	-18.9169	21.9061	4.65968e-15	-2.19248	-1.75915	5.10001	7.07582	-4.24952	17.7628	0.000495081	-0.21533	-0.072763	4.48116	4.62521
DKK1	-18.4775	16.3701	2.15217e-12	-6.90098	-5.48281	-2.25898	3.93292	-2.62589	16.5262	0.0179995	-0.376572	-0.04063	2.85588	3.06448
UBE2S	-18.0645	17.3221	1.11841e-12	-3.1326	-2.47822	0.58382	3.38923	-2.18164	16.1416	0.0442583	-0.241803	-0.00355619	2.75009	2.87277
SLC1A1	-17.7072	13.8051	6.94059e-11	-4.80566	-3.76604	-1.39219	2.89366	-3.56023	12.6532	0.00362743	-0.164954	-0.0401487	3.02839	3.13094
SNRPA	-17.3911	10.8714	2.79116e-09	-1.91298	-1.48262	1.62865	3.32645	-2.44727	16.9124	0.0256175	-0.175194	-0.0129389	3.19469	3.28876
SAE1	-17.3499	11.3672	1.5577e-09	-1.79447	-1.39184	3.51152	5.10467	-3.98351	14.1934	0.00132554	-0.143554	-0.0431551	3.67565	3.769
APLN	-17.1948	21.9557	3.17852e-14	-7.39168	-5.80039	-1.24025	5.35579	-5.34811	15.1365	7.88204e-05	-0.834425	-0.35912	3.50161	4.09838
CFL1	-17.1049	9.60808	1.62341e-08	-1.48203	-1.13874	5.87229	7.18268	-2.82975	17.9883	0.0111099	-0.154972	-0.0229035	4.50252	4.59145
FGF16	-16.8622	14.6249	5.47583e-11	-7.02395	-5.44438	-5.80288	0.43129	-3.39095	17.4053	0.00338243	-0.349293	-0.0816436	2.54265	2.75811
CDK2AP1	-16.6904	13.2635	2.74318e-10	-1.79396	-1.38351	2.17076	3.7595	-3.98973	14.3252	0.00128731	-0.170442	-0.0514249	3.73742	3.84835
NME4	-16.2087	10.4798	9.29282e-09	-2.39781	-1.82139	2.1965	4.3061	-4.5127	17.4392	0.000289671	-0.163162	-0.0593368	3.55206	3.66331
GAS2L3	-16.1656	8.5432	1.05608e-07	-3.82832	-2.88164	-1.11197	2.24302	-3.74701	17.8244	0.00149699	-0.278249	-0.0782317	2.74074	2.91898
ARHGAP18	-15.7992	16.2782	2.67998e-11	-2.91553	-2.22653	2.23517	4.8062	-7.37426	13.4245	4.4666e-06	-0.460142	-0.25214	3.59324	3.94938
CENPN	-15.6205	16.501	2.58632e-11	-3.40066	-2.58969	-0.690808	2.30437	-2.2431	16.1944	0.0392179	-0.199497	-0.00573014	2.68919	2.7918
RALA	-15.2575	17.3736	1.6885e-11	-3.09542	-2.34443	1.72945	4.44937	-7.3515	17.9477	8.13696e-07	-0.326709	-0.181455	3.93357	4.18765
ARHGAP24	-15.1338	8.40124	2.17394e-07	-5.32805	-3.92913	-0.0866113	4.54198	-3.11894	17.4561	0.00609545	-0.220321	-0.0427318	3.44612	3.57764
PFN1	-14.986	12.1817	3.24578e-09	-1.94972	-1.45546	5.06063	6.76322	-2.2579	17.9964	0.0366117	-0.14655	-0.00527689	4.3278	4.40372
LMNB2	-14.7203	11.1248	1.21437e-08	-2.72016	-2.01337	3.29767	5.66444	-2.12836	16.1519	0.0490419	-0.173104	-0.000410534	3.75008	3.83684
NACC1	-14.6898	8.38536	2.82291e-07	-2.11815	-1.54731	2.53195	4.36468	-3.67069	16.9916	0.00189597	-0.140681	-0.0379848	3.73969	3.82903
CEP170	-14.6791	16.8668	4.89922e-11	-2.0302	-1.51967	2.99161	4.76655	-2.70471	17.9155	0.0145473	-0.16897	-0.0212015	3.53665	3.63173
ZMYND19	-14.3434	9.95085	5.67104e-08	-2.15916	-1.5782	0.405602	2.27429	-2.70773	17.1152	0.0148688	-0.1201	-0.0149361	2.8696	2.93712
LINC00704	-14.2645	12.4655	4.32942e-09	-7.64102	-5.62333	-4.03219	2.59998	-8.58098	17.9446	9.12044e-08	-0.490386	-0.297453	2.63882	3.03274
MSANTD3	-14.1436	8.23846	4.56497e-07	-2.39872	-1.72909	0.918425	2.98233	-3.31909	17.0618	0.00404323	-0.137508	-0.0306476	3.22371	3.30779
CD274	-13.9351	12.8823	3.81722e-09	-3.08807	-2.25843	-0.787584	1.88567	-3.888	17.0876	0.0011722	-0.267019	-0.0792114	2.20158	2.37469
L3MBTL3	-13.8847	11.062	2.40513e-08	-2.91563	-2.11821	0.775656	3.29258	-3.88108	13.9952	0.00166355	-0.189377	-0.0545641	3.36761	3.48958
ESM1	-13.8328	8.81562	2.80167e-07	-6.04885	-4.34384	0.0744654	5.27081	-7.99126	17.6561	2.84782e-07	-0.657706	-0.38357	3.36283	3.88347
NF2	-13.7907	14.3204	1.15337e-09	-2.24428	-1.64125	3.76561	5.70837	-2.7276	17.9847	0.0138238	-0.19279	-0.0250159	3.43784	3.54674
HAGLR	-13.7302	11.4463	1.83736e-08	-3.95369	-2.86571	-1.23216	2.17754	-4.19044	15.43	0.000744282	-0.269802	-0.088165	3.3503	3.52929
MMP10	-13.7003	14.5671	1.0121e-09	-7.18734	-5.24771	-3.32283	2.8947	-2.80662	17.4611	0.011913	-0.651897	-0.0930354	2.64133	3.0138
CDCA4	-13.6622	18.6351	3.718e-11	-2.12129	-1.55703	1.00397	2.84313	-3.02543	16.8214	0.00769858	-0.175017	-0.031137	2.88141	2.98448
HS6ST2	-13.6455	15.0414	7.06965e-10	-4.18892	-3.05732	-4.37837	-0.755247	-4.17938	15.88	0.00071903	-0.27263	-0.0890584	2.57619	2.75704
EMC8	-13.5718	10.8849	3.65234e-08	-1.65256	-1.19084	1.36337	2.78507	-3.90756	11.6225	0.0022073	-0.163154	-0.0460708	3.07535	3.17996
ADAM9	-13.512	16.4381	2.5267e-10	-1.71908	-1.25369	4.62603	6.11242	-2.28411	15.686	0.0366594	-0.181719	-0.00662773	3.84945	3.94362
POLR2E	-13.347	10.0887	9.74036e-08	-1.55666	-1.11173	3.42642	4.76062	-2.84289	17.456	0.0110311	-0.160994	-0.023986	3.68671	3.7792
C15orf54	-13.173	11.6404	2.38822e-08	-7.60116	-5.4372	-4.65384	1.86534	-8.70955	14.7341	3.41372e-07	-0.747151	-0.452985	2.28454	2.8846
DSN1	-13.1114	19.8742	3.0588e-11	-1.92867	-1.39903	0.432251	2.0961	-2.98239	17.7316	0.00808158	-0.212374	-0.0367149	2.52702	2.65157
EIF4EBP1	-13.0514	8.42936	6.98068e-07	-3.51796	-2.46938	1.44176	4.43544	-4.73836	17.9965	0.000164156	-0.257461	-0.0992834	3.33401	3.51238
SOX17	-12.9141	19.666	4.6376e-11	-6.17309	-4.45458	-2.94644	2.36739	-3.11249	15.3176	0.00698854	-0.436816	-0.0821003	3.04584	3.30529
ASF1B	-12.8986	8.2021	9.85639e-07	-5.4148	-3.77829	-2.06654	2.53	-2.42183	16.4659	0.027313	-0.308409	-0.0208552	2.4322	2.59683
PKMYT1	-12.874	9.67467	2.09235e-07	-6.33221	-4.45645	-3.54383	1.8505	-2.18122	16.7049	0.0437633	-0.350835	-0.00560215	2.25777	2.43599
AP1B1	-12.792	13.7488	5.07102e-09	-1.68084	-1.19743	3.75109	5.19023	-6.75524	16.1539	4.39508e-06	-0.289194	-0.151122	3.81188	4.03204
PAQR4	-12.7026	7.7243	1.88728e-06	-3.77958	-2.61202	-1.23593	1.95987	-3.65194	17.9942	0.00182453	-0.276687	-0.0745943	2.78476	2.9604
USP31	-12.6605	21.5422	1.8928e-11	-1.49386	-1.07289	1.92348	3.20686	-5.40404	12.0431	0.000157062	-0.29228	-0.124364	3.28748	3.49581
HTR1B	-12.5544	8.66765	7.41076e-07	-4.13316	-2.8648	-0.166563	3.33242	-2.58894	15.7592	0.0199547	-0.351241	-0.0347701	2.62632	2.81933
ETV5	-12.5039	8.78926	6.74512e-07	-4.22599	-2.92713	-0.24382	3.33274	-5.2843	12.8939	0.000151929	-0.172099	-0.072157	3.34098	3.4631
BCKDK	-12.4839	12.73	1.63809e-08	-1.5265	-1.07528	2.3048	3.60569	-4.37626	8.80849	0.00187472	-0.120934	-0.0383328	3.45332	3.53295
NRP1	-12.4499	15.0547	2.49986e-09	-3.35553	-2.37479	3.12461	5.98977	-5.95146	17.7853	1.30846e-05	-0.345941	-0.165309	4.04865	4.30427
EIF2B2	-12.4112	14.5598	3.85888e-09	-2.61421	-1.84618	1.88701	4.11721	-3.08153	12.3747	0.00920896	-0.339276	-0.0587745	3.41649	3.61552
MRPL15	-12.3564	8.297	1.24746e-06	-2.8788	-1.97801	0.960747	3.38915	-3.00089	15.324	0.00878846	-0.186587	-0.0317752	3.28067	3.38985
SFXN1	-12.3409	11.5592	5.23768e-08	-1.88291	-1.31578	2.40541	4.00475	-3.99609	17.3475	0.000902768	-0.144902	-0.0448638	3.25789	3.35277
SMARCC1	-12.2202	12.6223	2.30962e-08	-1.11087	-0.776237	4.14386	5.08741	-2.7821	17.9529	0.0123204	-0.139217	-0.0194079	3.75419	3.83351
PGF	-12.2029	19.849	1.11448e-10	-7.18452	-5.08597	-0.590966	5.54428	-7.43351	14.5414	2.53588e-06	-0.62375	-0.345163	3.96287	4.44733
YKT6	-12.0706	15.0272	3.90768e-09	-1.46047	-1.02216	3.17267	4.41398	-3.62859	17.1219	0.00205576	-0.147606	-0.0391039	3.65367	3.74702
POLD1	-12.066	9.13216	6.44124e-07	-2.45773	-1.68311	1.26165	3.33207	-2.44207	14.0265	0.0284463	-0.117751	-0.00764194	2.99684	3.05954
GBE1	-11.9561	8.98607	8.05478e-07	-2.80302	-1.91091	1.93718	4.29414	-3.50656	17.9637	0.00252602	-0.182374	-0.0457036	3.42546	3.5395
TIMM17A	-11.9289	13.5734	1.41354e-08	-1.99687	-1.38671	1.88408	3.57587	-2.20784	17.9431	0.040515	-0.157636	-0.00389351	3.20309	3.28386
IPO9	-11.8994	9.43748	5.39719e-07	-1.32089	-0.901383	3.61963	4.73077	-4.60107	10.762	0.000808207	-0.139561	-0.0490786	3.71426	3.80858
PFDN1	-11.8097	9.28533	6.68238e-07	-1.56793	-1.06579	2.47833	3.79519	-3.95922	15.673	0.00116575	-0.155012	-0.0467814	3.26693	3.36783
CYTOR	-11.7536	15.6448	3.58214e-09	-2.01133	-1.3957	0.842588	2.5461	-10.6998	17.9995	3.12361e-09	-0.326722	-0.219475	2.6468	2.9199
MEX3A	-11.7275	18.2815	6.06595e-10	-2.81357	-1.95945	0.423504	2.81002	-4.8021	13.0267	0.000343575	-0.255103	-0.0968152	3.35475	3.53071
CKAP4	-11.71	7.93517	2.76172e-06	-1.82665	-1.22487	4.54776	6.07351	-3.82782	16.8258	0.00136899	-0.195138	-0.0563909	4.14902	4.27478
TIMM22	-11.6491	8.74236	1.2744e-06	-1.7181	-1.15722	1.61267	3.05033	-2.31592	16.4224	0.0337869	-0.120165	-0.00543522	3.00052	3.06332
DPYSL4	-11.626	9.23591	8.03466e-07	-6.95514	-4.69675	-2.91182	2.91413	-3.78037	16.439	0.00157192	-0.32113	-0.0906935	3.17247	3.37839
SMPD4	-11.6091	12.3962	5.04549e-08	-1.6718	-1.145	2.4167	3.8251	-2.59717	17.9849	0.0182157	-0.138184	-0.0145918	3.2705	3.34688
TCF3	-11.598	10.96	1.70834e-07	-1.49534	-1.01813	3.55551	4.81225	-3.74711	14.8933	0.00196416	-0.129378	-0.0355208	3.9329	4.01535
PLOD1	-11.5714	17.5259	1.23357e-09	-1.39484	-0.965467	4.63217	5.81232	-6.7298	13.9556	9.78648e-06	-0.279396	-0.144318	4.2345	4.44635
GNPNAT1	-11.5212	19.3725	4.07816e-10	-2.20031	-1.52451	0.631413	2.49382	-2.23733	14.2561	0.041728	-0.164646	-0.00361578	3.2597	3.34383
LINC02407	-11.4666	8.35944	2.11306e-06	-7.19985	-4.80379	-5.0104	0.991425	-2.95683	16.5403	0.009028	-0.351167	-0.0583445	1.88148	2.08624
SLC35F2	-11.4375	8.11887	2.73977e-06	-2.77275	-1.84425	1.95878	4.26728	-2.50542	13.2456	0.0260269	-0.165318	-0.0123808	3.40638	3.49523
DCBLD1	-11.3969	20.4813	2.53154e-10	-1.61808	-1.11804	2.08656	3.45462	-3.50675	17.9619	0.00252525	-0.280006	-0.0701769	3.26668	3.44177
YDJC	-11.3594	11.7373	1.10154e-07	-1.96408	-1.33057	0.464448	2.11178	-4.50009	17.9937	0.000277164	-0.204382	-0.0742814	2.58769	2.72702
PSMD13	-11.3447	10.1707	4.24741e-07	-1.42059	-0.95506	3.53449	4.72231	-2.92074	17.8786	0.0091735	-0.147855	-0.0241033	3.57295	3.65893
ETV4	-11.334	7.72077	4.38836e-06	-7.3441	-4.84785	-3.4455	2.65047	-2.33259	17.9725	0.0314958	-0.282702	-0.0147568	2.94725	3.09597
DAB2	-11.3311	10.0908	4.61154e-07	-1.91771	-1.28809	3.6248	5.2277	-5.42486	17.1825	4.38537e-05	-0.24702	-0.108763	3.92841	4.1063
S100A16	-11.2697	9.93715	5.56353e-07	-1.98538	-1.32944	4.64546	6.30287	-2.19119	15.1709	0.0444493	-0.160913	-0.00230257	4.1839	4.2655
MRPL17	-11.2386	13.3437	3.51822e-08	-1.8876	-1.28024	2.53338	4.1173	-2.23893	17.9877	0.0380402	-0.153868	-0.00488919	3.18282	3.2622
CDK16	-11.1848	10.3032	4.329e-07	-1.31922	-0.882383	3.46021	4.56102	-2.85842	15.5435	0.0116349	-0.115885	-0.0170556	3.67406	3.74053
PCDH10	-11.1273	8.64684	2.03485e-06	-4.21945	-2.78628	1.26849	4.77135	-3.27338	17.6561	0.00430667	-0.352086	-0.076577	4.0139	4.22823
NRIP3	-11.1237	10.3395	4.42171e-07	-6.19534	-4.13523	-3.43119	1.7341	-2.77007	17.9914	0.0126237	-0.491448	-0.0675037	2.19018	2.46966
ENO1	-11.0503	8.14471	3.48051e-06	-2.6816	-1.75799	6.27695	8.49675	-3.31502	17.347	0.00400646	-0.188642	-0.042046	4.52616	4.64151
MT1E	-11.0379	16.6914	4.35427e-09	-4.69108	-3.18374	-0.946998	2.99041	-2.71969	16.4259	0.0148895	-0.365268	-0.045647	2.05823	2.26368
PCYT2	-11.0218	15.7644	8.16086e-09	-1.73976	-1.1779	1.01138	2.47021	-4.3349	12.7483	0.000845761	-0.229155	-0.0765136	2.85381	3.00664
NAV1	-11.0144	8.25447	3.20983e-06	-3.79563	-2.48726	2.00586	5.1473	-4.60239	17.8515	0.00022552	-0.21447	-0.0799786	3.78888	3.93611
TNPO1	-10.9606	9.33552	1.22424e-06	-1.98643	-1.30983	4.4667	6.11483	-3.48525	15.359	0.00322198	-0.157141	-0.0380264	4.06089	4.15847
PHEX	-10.9463	16.9339	4.22247e-09	-5.26291	-3.56155	-5.71076	-1.29852	-2.86217	17.7948	0.0104419	-0.482289	-0.0737794	1.88522	2.16325
TGFBRAP1	-10.9164	12.3369	1.06241e-07	-1.0863	-0.725728	2.87579	3.7818	-9.72837	10.9781	9.88303e-07	-0.258967	-0.163388	3.45458	3.66576
MGLL	-10.9137	10.0873	6.5801e-07	-2.70776	-1.79048	2.37773	4.62684	-3.02285	17.9439	0.00733153	-0.269267	-0.0484202	3.42489	3.58373
PPP1CA	-10.7637	9.37512	1.38445e-06	-1.44737	-0.947169	3.5808	4.77807	-2.64831	16.2196	0.017384	-0.123407	-0.0137426	3.65083	3.71941
SEC13	-10.747	15.2663	1.60994e-08	-1.55985	-1.04418	4.03821	5.34023	-4.12628	17.9085	0.000640058	-0.174768	-0.0568137	3.73621	3.852
SLC4A7	-10.7194	9.34298	1.47623e-06	-2.69779	-1.76189	2.44671	4.67655	-6.0922	16.1692	1.48734e-05	-0.34155	-0.165323	3.3734	3.62684
PRKACB	-10.6784	11.3296	2.94414e-07	-2.48891	-1.64074	1.88565	3.95048	-2.77221	17.8613	0.0126256	-0.225978	-0.0310673	3.43088	3.55941
SLC17A9	-10.5876	8.66547	2.99462e-06	-3.0716	-1.98485	1.10287	3.63109	-2.45278	14.2634	0.0276161	-0.241981	-0.016419	2.95041	3.07961
N4BP3	-10.5383	21.5513	5.78349e-10	-6.84963	-4.59472	-2.6049	3.11728	-5.91762	15.5685	2.42313e-05	-0.545168	-0.257114	3.37937	3.78051
FAH	-10.5243	12.8636	1.09274e-07	-2.26159	-1.49054	-0.553379	1.32268	-2.56112	13.8938	0.0227293	-0.301868	-0.0265987	2.10316	2.2674
SLC38A1	-10.5203	16.2743	1.1389e-08	-3.21937	-2.14075	1.86604	4.5461	-5.14129	16.8938	8.32188e-05	-0.239881	-0.10024	3.66596	3.83602
FABP5	-10.4787	18.5684	3.13506e-09	-5.35324	-3.56841	-3.5983	0.862528	-5.21946	16.1271	8.21798e-05	-0.355732	-0.150326	1.70812	1.96115
AC073130.1	-10.4654	7.57608	9.01477e-06	-7.42113	-4.71967	-5.02427	1.04612	-2.74833	17.2054	0.0136086	-0.343014	-0.0452362	1.92901	2.12314
NT5DC2	-10.4565	13.2024	9.27398e-08	-2.84894	-1.87456	2.19989	4.56164	-5.44079	17.8411	3.72518e-05	-0.294304	-0.130258	3.83007	4.04235
LOXL2	-10.444	11.4547	3.36768e-07	-2.97072	-1.94067	3.17145	5.62714	-8.47039	9.78706	8.18414e-06	-0.178868	-0.10419	4.2791	4.42063
RANGAP1	-10.4347	11.7668	2.68545e-07	-2.5159	-1.64514	3.26448	5.345	-2.44807	17.1663	0.0253956	-0.182377	-0.0136018	3.66326	3.76125
RNASEH1	-10.4344	15.9557	1.55748e-08	-1.59315	-1.05501	0.810854	2.13493	-2.43676	15.967	0.0269024	-0.134746	-0.00935838	2.78917	2.86122
MRPS34	-10.4206	9.443	1.73295e-06	-1.87315	-1.20885	1.47321	3.01422	-2.53781	14.8265	0.0228924	-0.0994847	-0.00860761	3.24008	3.29412
SCN5A	-10.4166	8.73244	3.21939e-06	-6.64684	-4.26583	-3.02044	2.43589	-5.02133	17.9156	8.98764e-05	-0.336282	-0.137842	2.61949	2.85656
SEC14L1	-10.3607	7.90108	7.13607e-06	-2.58901	-1.64466	3.81695	5.93378	-9.14159	17.8434	3.75967e-08	-0.322124	-0.20167	4.27505	4.53695
CCNE2	-10.3317	10.3433	8.92763e-07	-4.5836	-2.96331	-2.95729	0.81616	-3.30773	16.8376	0.00420363	-0.37163	-0.082044	2.15753	2.38437
UBE3C	-10.322	12.6331	1.61008e-07	-0.952593	-0.622049	4.12587	4.91319	-2.29382	12.4323	0.0399499	-0.0887263	-0.0024521	3.79996	3.84554
SLC35B2	-10.2621	7.96662	7.21191e-06	-1.73881	-1.10035	1.64941	3.06898	-3.92038	10.0717	0.00282578	-0.149345	-0.0411705	3.27788	3.37314
KIT	-10.241	18.2688	5.32805e-09	-5.7761	-3.81132	-2.42855	2.36516	-16.5135	15.9855	1.81902e-11	-0.660744	-0.51039	3.09123	3.67679
MYO6	-10.2407	15.1084	3.41078e-08	-1.51958	-0.996268	2.10406	3.36198	-8.65546	10.3286	4.72026e-06	-0.276	-0.163379	3.60794	3.82763
MYO1B	-10.2183	19.6674	2.61059e-09	-5.56467	-3.6762	-1.39899	3.22144	-4.05926	15.0597	0.00102014	-0.441817	-0.137652	3.45671	3.74644
SGTA	-10.2047	10.1326	1.18661e-06	-1.35465	-0.869811	2.93963	4.05186	-2.45916	17.0382	0.0249165	-0.12029	-0.00920768	3.50441	3.56916
LRRC59	-10.1521	13.001	1.50866e-07	-2.11394	-1.37211	3.78734	5.53037	-2.13179	16.8601	0.0480383	-0.170302	-0.00082847	3.81467	3.90024
CDYL2	-10.1334	11.4915	4.48877e-07	-1.51023	-0.973553	2.87304	4.11493	-3.40732	12.6453	0.00484887	-0.148737	-0.0331099	3.58424	3.67517
RNF25	-10.1326	12.4497	2.25838e-07	-1.10877	-0.71761	1.59107	2.50426	-2.44102	12.9813	0.029734	-0.121677	-0.00741243	2.85391	2.91845
PTRH2	-10.0657	12.1199	3.06472e-07	-1.51761	-0.978003	1.09232	2.34013	-2.20254	17.6829	0.0411487	-0.139086	-0.00319497	2.77361	2.84475
LRRC3	-10.0561	13.0423	1.6386e-07	-2.17836	-1.40813	-1.12455	0.668696	-2.96159	14.4399	0.0100284	-0.34538	-0.0557264	2.60452	2.80507
KRT80	-10.0274	17.1378	1.37662e-08	-4.45185	-2.9049	-2.36303	1.31534	-4.41483	17.7957	0.000342733	-0.458686	-0.162726	2.2993	2.61
GPX4	-9.9903	16.4622	2.13044e-08	-1.61928	-1.05343	3.68001	5.01636	-6.52518	11.0153	4.24998e-05	-0.191782	-0.0950488	3.90611	4.04953
TMEM177	-9.97138	8.25078	6.94989e-06	-2.81241	-1.76045	-1.60859	0.677839	-3.26688	13.8207	0.0057044	-0.228515	-0.0472489	2.19675	2.33463
PRMT1	-9.97117	8.9378	3.86078e-06	-1.89505	-1.19359	3.7618	5.30612	-3.37693	17.7783	0.00340546	-0.153519	-0.0356958	3.62503	3.71964
TBC1D4	-9.95281	11.7682	4.43964e-07	-1.6094	-1.03027	2.66509	3.98492	-2.2664	13.6842	0.0402034	-0.181629	-0.0048107	3.51392	3.60714
NHSL1	-9.92269	17.3971	1.3936e-08	-2.16831	-1.409	2.14766	3.93632	-4.69602	14.3788	0.00032049	-0.248092	-0.0927876	3.32074	3.49118
SNRPB	-9.91176	9.16447	3.36344e-06	-1.99975	-1.25821	3.41175	5.04072	-4.0281	17.6975	0.000812623	-0.226021	-0.070944	3.42208	3.57057
KCTD5	-9.89311	11.0651	7.84599e-07	-1.41882	-0.902702	1.44772	2.60848	-3.40153	12.0224	0.00524182	-0.166761	-0.0365555	3.04681	3.14847
ATAD3A	-9.85641	9.11804	3.6627e-06	-2.42632	-1.52194	1.09892	3.07305	-3.00087	17.2346	0.00794858	-0.15862	-0.0277354	3.03086	3.12404
ENC1	-9.80591	11.6478	5.65438e-07	-2.77375	-1.76244	1.75684	4.02494	-2.66562	17.9987	0.0157602	-0.260471	-0.0308576	3.31198	3.45764
GPI	-9.74762	14.1274	1.18387e-07	-1.2719	-0.813448	4.71736	5.76004	-2.30653	16.9704	0.0339656	-0.122482	-0.00544738	3.85659	3.92055
THBS1	-9.73969	8.27808	8.13075e-06	-2.11038	-1.30617	8.86561	10.5739	-8.36142	17.3132	1.73715e-07	-0.593138	-0.354382	5.18696	5.66072
NES	-9.72622	7.77677	1.26919e-05	-3.34135	-2.0554	4.00005	6.69843	-2.73102	15.8266	0.0149087	-0.185725	-0.023316	4.15825	4.26277
FRMD4A	-9.71754	10.8992	1.05798e-06	-3.54704	-2.23578	0.93869	3.8301	-4.9755	17.1965	0.00011159	-0.279997	-0.113348	3.59442	3.79109
PPP1R14B	-9.6909	8.46209	7.23476e-06	-2.22624	-1.37693	2.80054	4.60212	-2.49219	17.113	0.0232406	-0.145837	-0.0121537	3.58872	3.66772
TMEM11	-9.67388	10.2193	1.82377e-06	-1.45169	-0.90944	0.812116	1.99268	-2.40326	16.0879	0.0286587	-0.126032	-0.00792309	2.91464	2.98162
KNTC1	-9.66902	19.6502	6.56901e-09	-1.75848	-1.1338	1.89153	3.33767	-2.87339	17.6534	0.0102523	-0.19314	-0.0298603	2.72278	2.83428
C12orf65	-9.64166	10.4386	1.59843e-06	-1.33891	-0.838562	0.800498	1.88924	-2.55857	12.4842	0.0244277	-0.137441	-0.0113106	2.41914	2.49351
NCS1	-9.62782	7.48119	1.77348e-05	-2.89735	-1.76663	2.13165	4.46364	-4.21358	17.9681	0.000524039	-0.19811	-0.0662709	3.49484	3.62703
UROD	-9.59279	11.0702	1.06394e-06	-1.52575	-0.956632	3.20502	4.44621	-2.2198	13.7306	0.0438064	-0.119582	-0.00194512	3.36122	3.42199
PTBP1	-9.592	12.453	4.14872e-07	-1.2804	-0.807942	4.88152	5.92569	-3.00815	17.8963	0.00758606	-0.145373	-0.0257849	4.13177	4.21735
FABP4	-9.58593	19.9081	6.69476e-09	-7.46894	-4.79864	-4.3636	1.77019	-7.50049	15.3638	1.62842e-06	-0.505609	-0.282195	3.67196	4.06586
REPIN1	-9.54504	8.36744	8.81022e-06	-1.31964	-0.809228	3.20648	4.27092	-2.56044	11.358	0.0259211	-0.121487	-0.00940327	3.72622	3.79166
FOCAD	-9.5422	9.42946	3.76579e-06	-2.35967	-1.46032	2.41825	4.32824	-5.73258	16.4323	2.7826e-05	-0.177647	-0.0818791	3.42665	3.55641
PRSS23	-9.53741	9.39881	3.87309e-06	-2.88057	-1.78182	4.39523	6.72642	-2.46161	16.8882	0.0248986	-0.240577	-0.0184534	4.16001	4.28953
KRT7	-9.50845	21.8061	3.25828e-09	-7.34586	-4.71412	-1.93421	4.09578	-3.90109	17.0699	0.00114124	-0.457698	-0.136461	3.41749	3.71457
SPOCD1	-9.49658	7.41076	2.0768e-05	-6.63172	-4.01116	-0.940976	4.38046	-2.99408	14.8386	0.0091692	-0.378855	-0.0635873	2.76056	2.98178
GALE	-9.4845	11.1607	1.11852e-06	-1.287	-0.802874	1.84321	2.88814	-2.16446	17.5458	0.0444834	-0.10485	-0.00146465	3.02795	3.08111
DNAH11	-9.47487	8.93241	5.90366e-06	-5.6528	-3.47176	-6.001	-1.43872	-4.60614	17.8733	0.00022302	-0.560785	-0.209341	0.868456	1.25352
PFN2	-9.43619	9.13145	5.2209e-06	-2.02885	-1.24558	1.72919	3.36641	-2.71605	17.4124	0.0144544	-0.159814	-0.0202181	3.44117	3.53118
ACO1	-9.4074	13.0548	3.51587e-07	-1.23273	-0.772449	3.03073	4.03332	-3.18908	12.3977	0.00750464	-0.125393	-0.0238145	3.39239	3.46699
WASF3	-9.40593	12.4534	5.14967e-07	-1.56406	-0.977661	1.96856	3.23942	-5.04221	17.5833	9.0793e-05	-0.313297	-0.128784	3.38874	3.60978
MARCKS	-9.39862	15.7725	7.31329e-08	-1.54627	-0.976567	4.95987	6.22129	-5.44793	14.8404	6.99106e-05	-0.14997	-0.0655651	4.48083	4.5886
PMPCA	-9.38391	8.76924	7.26887e-06	-1.53794	-0.938537	2.3409	3.57914	-3.58224	17.4226	0.00222234	-0.146135	-0.0379282	3.26245	3.35448
PLS3	-9.38272	9.43196	4.3455e-06	-1.75017	-1.07399	5.38433	6.79642	-4.54098	14.0116	0.000460642	-0.197073	-0.070638	4.24787	4.38172
LRRC42	-9.38162	10.447	2.05705e-06	-1.3437	-0.830341	0.965828	2.05285	-3.91518	11.2865	0.0022996	-0.105454	-0.029706	3.03443	3.10201
DDA1	-9.35547	13.8711	2.28593e-07	-0.966824	-0.605945	2.06478	2.85117	-3.2293	13.9024	0.00610439	-0.138417	-0.0278895	3.29596	3.37911
MRGBP	-9.35545	10.0859	2.73984e-06	-1.25526	-0.772805	1.59409	2.60812	-2.73342	13.5728	0.0165315	-0.103705	-0.0123626	3.05392	3.11195
EIF2S2	-9.34452	9.20891	5.33603e-06	-1.7368	-1.06167	3.13045	4.52969	-2.90995	16.5683	0.00995064	-0.114434	-0.0181296	3.36242	3.4287
COX8A	-9.33612	10.0713	2.82171e-06	-1.18871	-0.730997	2.97074	3.9306	-2.10553	17.5271	0.0499475	-0.131989	-1.68838e-05	3.16244	3.22844
NLN	-9.32871	7.45418	2.26181e-05	-3.4766	-2.08426	0.624005	3.40443	-3.29557	17.0277	0.00426334	-0.223929	-0.0491354	3.11812	3.25465
CMTM7	-9.32774	8.03792	1.37937e-05	-3.86169	-2.33179	-0.672245	2.4245	-4.29337	17.0706	0.000487746	-0.200045	-0.0682454	3.02636	3.16051
MAD2L1BP	-9.32572	10.1843	2.62649e-06	-1.4954	-0.91977	0.863607	2.07119	-2.27686	12.7372	0.0407384	-0.132761	-0.00334626	2.85408	2.92213
SPDL1	-9.28966	9.33082	5.10992e-06	-3.66492	-2.23576	0.0788015	3.02914	-2.19622	15.3616	0.0438169	-0.23903	-0.00382205	2.81327	2.9347
SSR3	-9.27808	12.2109	6.98346e-07	-2.09966	-1.30229	4.01712	5.71809	-2.85363	16.9302	0.0110227	-0.175638	-0.0262937	3.76983	3.8708
SLC52A2	-9.26713	8.99774	6.72874e-06	-1.49705	-0.909558	2.14011	3.34342	-4.50339	17.9639	0.000276198	-0.197672	-0.0718953	3.23224	3.36702
PEG10	-9.25065	20.213	1.04882e-08	-3.52567	-2.22892	0.407427	3.28473	-5.07085	14.7374	0.000145758	-0.466891	-0.190245	3.2905	3.61907
ANGPT2	-9.23005	9.53622	4.62865e-06	-3.9214	-2.38817	1.26992	4.42471	-8.58089	14.509	4.60758e-07	-0.795951	-0.478459	3.63889	4.2761
CALM3	-9.21713	11.0983	1.55231e-06	-1.08097	-0.664594	4.69917	5.57195	-2.37648	16.3274	0.0300268	-0.155084	-0.00897544	4.0886	4.17063
FRMD5	-9.21599	8.13264	1.39596e-05	-4.82908	-2.90048	-1.63696	2.22782	-3.83758	17.6687	0.00124132	-0.259298	-0.0756695	2.69746	2.86495
TMEM237	-9.14396	15.0613	1.54784e-07	-1.63297	-1.01577	1.19484	2.51922	-3.09963	14.8876	0.00737653	-0.208741	-0.0385678	2.80311	2.92677
PHB2	-9.08976	9.03548	7.66342e-06	-1.19118	-0.716661	4.26634	5.22026	-2.6995	9.82012	0.0226714	-0.114935	-0.0108528	3.80918	3.87208
MPP4	-9.06226	10.2861	3.18273e-06	-6.71357	-4.07175	-4.54478	0.847873	-4.45164	17.8363	0.000314514	-0.63444	-0.227422	1.70562	2.13655
RPSAP52	-9.05988	7.80603	2.06681e-05	-6.31791	-3.74539	-4.53591	0.495735	-2.90066	16.4089	0.010223	-0.288402	-0.0451345	1.41277	1.57953
TNFSF18	-9.05209	21.1033	1.03049e-08	-7.35676	-4.60866	-5.05572	0.926991	-3.46536	15.344	0.00336184	-0.531646	-0.127199	2.05085	2.38027
PALD1	-9.03618	17.0971	6.38371e-08	-3.48137	-2.16386	0.84571	3.66832	-3.19419	16.6161	0.00543531	-0.451673	-0.0919612	3.54207	3.81389
TFRC	-9.01696	8.07268	1.72413e-05	-3.65202	-2.16635	2.71217	5.62136	-2.78448	15.7692	0.0133959	-0.184374	-0.0248763	3.83071	3.93533
MMS19	-9.01037	18.8918	2.8793e-08	-1.15678	-0.720528	3.76526	4.70391	-2.9289	11.0704	0.013633	-0.106062	-0.0150903	3.61188	3.67245
CFAP54	-9.00472	19.0851	2.667e-08	-3.95186	-2.46159	-0.920442	2.28628	-2.6025	17.0837	0.0185325	-0.289962	-0.0303696	2.71216	2.87233
FUOM	-9.00011	12.4987	8.12535e-07	-2.06516	-1.263	-0.605542	1.05854	-4.07571	14.7701	0.00102373	-0.225646	-0.0705407	2.21164	2.35973
RNF121	-8.96553	18.4406	3.81036e-08	-1.4868	-0.923056	1.79219	2.99712	-2.86105	17.9002	0.010423	-0.209395	-0.0320364	2.86454	2.98526
RNF4	-8.96255	9.49324	6.15433e-06	-1.26098	-0.755918	2.96043	3.96888	-3.38031	12.3143	0.00528284	-0.144998	-0.0315338	3.36893	3.4572
RTN4	-8.94377	15.5308	1.61064e-07	-1.52847	-0.941565	4.62965	5.86467	-4.00755	17.9982	0.000825965	-0.195135	-0.0609065	4.21415	4.34217
TMEM8A	-8.93798	10.375	3.40244e-06	-1.51046	-0.910008	3.26043	4.47066	-3.56115	14.021	0.00312418	-0.147729	-0.0366801	3.80954	3.90174
LYPLA2	-8.91142	9.33525	7.24247e-06	-1.68484	-1.0056	2.6828	4.02801	-3.53723	15.7892	0.00278794	-0.14505	-0.0362667	3.42469	3.51535
APEH	-8.89866	19.0681	3.23177e-08	-1.23233	-0.763102	2.88813	3.88584	-2.44295	17.6477	0.0253345	-0.152436	-0.0113657	3.16753	3.24943
PRDM4	-8.89216	9.19199	8.18383e-06	-0.855559	-0.509413	2.79089	3.47338	-2.90979	12.4315	0.0126726	-0.122748	-0.0178637	3.32353	3.39384
CLTC	-8.87764	9.34717	7.4143e-06	-0.947122	-0.564187	5.88161	6.63726	-2.27098	17.8309	0.035783	-0.0794905	-0.00306495	4.35928	4.40056
CERS1	-8.87477	19.0262	3.43169e-08	-5.01738	-3.10255	-5.90888	-1.84891	-4.63934	17.7479	0.000210991	-0.310027	-0.116622	2.30266	2.51599
PRDX4	-8.87121	10.1635	4.21005e-06	-1.54906	-0.928207	2.93832	4.17695	-3.25374	17.7564	0.00447004	-0.182067	-0.0391122	3.34471	3.4553
RNF126	-8.85256	11.5961	1.68631e-06	-1.54792	-0.93456	2.0838	3.32504	-2.54037	17.7829	0.0206356	-0.122997	-0.0115923	3.19919	3.26649
EVA1A	-8.85194	8.53393	1.38474e-05	-6.04069	-3.56525	-2.60782	2.19516	-10.0867	17.257	1.1798e-08	-0.479865	-0.314001	3.02464	3.42157
IAH1	-8.82876	15.638	1.80817e-07	-1.01221	-0.619644	1.18233	1.99826	-2.64434	16.139	0.0175788	-0.138293	-0.0152708	2.65178	2.72856
MAP2K1	-8.81237	9.26827	8.34919e-06	-1.41223	-0.837306	1.93111	3.05588	-3.90014	17.9071	0.00105787	-0.170013	-0.0509439	3.4128	3.52327
SLC25A10	-8.80869	7.50168	3.23192e-05	-4.80946	-2.79536	-3.64657	0.155842	-3.51946	17.8831	0.00246847	-0.2589	-0.0652874	1.87764	2.03973
CENPJ	-8.75386	19.5536	3.39472e-08	-1.66064	-1.02075	0.821996	2.1627	-2.6236	14.1169	0.0199274	-0.214938	-0.0216655	2.43044	2.54874
FSCN1	-8.74793	13.6646	5.7218e-07	-1.71412	-1.03785	4.61594	5.99192	-3.85145	16.0754	0.00140026	-0.213107	-0.0618327	4.40565	4.54312
P3H1	-8.74554	10.9424	2.87669e-06	-1.24297	-0.742871	3.86929	4.86221	-5.15286	15.9171	9.7858e-05	-0.173092	-0.072154	3.81257	3.9352
PKIG	-8.73909	13.3749	6.79499e-07	-1.64634	-0.995189	3.77479	5.09555	-2.36202	16.937	0.0304153	-0.142374	-0.00800957	3.68583	3.76103
PKIA	-8.70793	11.4686	2.15689e-06	-2.96805	-1.77513	0.551267	2.92286	-2.24165	17.6162	0.0381167	-0.176295	-0.00557568	3.3284	3.41933
CCL14	-8.69515	9.44289	8.25881e-06	-5.97708	-3.52305	-5.34343	-0.593365	-6.59975	16.9744	4.54019e-06	-0.671296	-0.346037	1.6487	2.15737
KNOP1	-8.68872	9.50442	7.96198e-06	-1.60128	-0.943938	0.664631	1.93724	-2.71082	16.8852	0.0148998	-0.152006	-0.0189123	2.93858	3.02403
NOTCH4	-8.66975	18.8168	5.37777e-08	-4.31964	-2.63868	0.123449	3.60261	-4.07213	13.1203	0.00129668	-0.379938	-0.116703	3.44719	3.69551
RAB1B	-8.66209	13.0549	8.98506e-07	-0.891625	-0.535776	3.42886	4.14256	-2.69798	12.4323	0.0188738	-0.106532	-0.0115437	3.8418	3.90084
FAM196B	-8.63817	9.56729	8.01317e-06	-5.89	-3.46268	-2.26896	2.40738	-2.77395	17.9921	0.0125191	-0.351853	-0.0485714	2.49131	2.69152
CHST7	-8.63199	16.4282	1.66472e-07	-2.93368	-1.7788	-1.02391	1.33233	-8.30513	17.263	1.95115e-07	-0.380681	-0.22659	2.71549	3.01912
SLC19A1	-8.61141	7.69923	3.23245e-05	-2.72591	-1.56816	1.04924	3.19627	-4.26455	17.7592	0.000479136	-0.17527	-0.059499	3.02921	3.14659
SCRN1	-8.60906	21.2694	2.24709e-08	-3.63372	-2.22063	0.745389	3.67256	-2.19709	17.5702	0.0416873	-0.340594	-0.00732205	3.62048	3.79444
PGAM1	-8.59863	8.90564	1.32436e-05	-2.29809	-1.33954	2.02777	3.84659	-3.84322	17.2802	0.00126948	-0.229047	-0.0668231	2.81864	2.96658
EXOSC9	-8.59681	16.769	1.50265e-07	-1.47679	-0.894278	1.21919	2.40472	-2.41538	17.8392	0.0266793	-0.201476	-0.0139633	2.67927	2.78699
RAC3	-8.553	8.57392	1.75518e-05	-5.15069	-2.98302	-2.00459	2.06226	-4.04983	17.962	0.00075444	-0.208524	-0.0660581	2.95984	3.09713
TSPAN13	-8.49313	21.9917	2.16279e-08	-4.57191	-2.77732	-2.68248	0.992137	-5.62609	14.5616	5.39315e-05	-0.422385	-0.189835	3.00541	3.31152
EDEM1	-8.44576	10.9622	3.97754e-06	-0.910877	-0.534143	2.90712	3.62963	-5.89245	12.321	6.59317e-05	-0.192412	-0.0887486	3.58194	3.72252
CCDC71L	-8.41209	9.04037	1.43781e-05	-1.3113	-0.755798	2.56805	3.6016	-6.5219	17.8007	4.16234e-06	-0.230682	-0.118204	3.514	3.68844
TPGS2	-8.40222	7.70883	3.8148e-05	-2.775	-1.57362	2.65669	4.831	-3.59805	13.8707	0.00294914	-0.137066	-0.0346294	3.79689	3.88274
MYO10	-8.37118	9.76557	9.19578e-06	-1.90731	-1.10335	4.27118	5.77651	-5.8455	17.7098	1.65291e-05	-0.262791	-0.123715	4.11964	4.31289
HHIP	-8.36815	8.36639	2.412e-05	-3.74357	-2.13569	3.79982	6.73945	-3.02957	17.6297	0.00733253	-0.408513	-0.0736455	4.31928	4.56036
MCRIP2	-8.3538	8.22567	2.70582e-05	-1.98055	-1.12685	-0.19524	1.35846	-3.20486	15.8598	0.00557115	-0.152647	-0.0310504	2.40746	2.49931
PYCR1	-8.30685	9.99684	8.47241e-06	-1.88166	-1.08569	1.9841	3.46777	-5.93664	16.4549	1.85958e-05	-0.286309	-0.135886	3.27522	3.48632
XPOT	-8.28259	12.2367	2.30591e-06	-1.39323	-0.813873	3.54981	4.65336	-2.23573	17.6133	0.0385722	-0.129731	-0.00393072	3.54631	3.61314
PLEKHJ1	-8.27067	9.53789	1.18379e-05	-1.58142	-0.906689	1.5794	2.82346	-4.37078	16.3306	0.000454442	-0.183934	-0.0639185	2.9664	3.09032
MYDGF	-8.21855	13.3805	1.36527e-06	-1.24489	-0.727829	2.84332	3.82968	-3.50399	17.0839	0.00270364	-0.155268	-0.0385877	3.52985	3.62678
FNDC10	-8.21593	10.8619	5.49819e-06	-2.91045	-1.67905	-3.01756	-0.722808	-2.2441	17.1221	0.0383281	-0.18366	-0.00571416	2.32931	2.424
ACOT9	-8.20754	9.07344	1.71597e-05	-1.59614	-0.907061	2.8823	4.1339	-4.7169	15.5744	0.000249575	-0.21989	-0.0833173	3.2616	3.41321
SPATS2	-8.17049	16.3254	3.65255e-07	-1.12701	-0.663259	2.36748	3.26262	-2.52236	15.4434	0.0230711	-0.133923	-0.0114154	3.30476	3.37743
C21orf58	-8.11783	7.61877	5.18886e-05	-3.53757	-1.9617	-1.18018	1.56946	-2.35609	17.0163	0.0307189	-0.16466	-0.00908612	2.14889	2.23576
JAK1	-8.11045	17.6286	2.33832e-07	-1.12303	-0.660365	4.85847	5.75017	-3.36145	16.5455	0.00381993	-0.143089	-0.0325917	4.00505	4.09289
RNF144B	-8.10716	19.5612	1.11395e-07	-1.74781	-1.03163	3.2159	4.60562	-4.9744	12.0047	0.000322498	-0.217681	-0.085077	3.41099	3.56237
STARD3NL	-8.09148	7.52233	5.69947e-05	-1.6524	-0.913092	2.22345	3.50619	-2.76299	13.9298	0.015308	-0.123226	-0.0154934	3.31916	3.38852
DOCK4	-8.07654	16.9007	3.34024e-07	-1.80475	-1.05688	4.0316	5.46241	-3.64591	16.4363	0.002096	-0.154253	-0.0409799	4.04763	4.14525
F2RL1	-8.072	14.4409	9.99622e-07	-5.91986	-3.43999	-1.41573	3.26419	-5.53822	17.9325	2.98088e-05	-0.388321	-0.174687	3.25854	3.54004
GNG11	-8.03578	14.0064	1.29609e-06	-2.45011	-1.41779	3.7663	5.70025	-5.56672	17.5185	3.05618e-05	-0.261086	-0.117807	4.24168	4.43113
KDM1A	-8.02284	10.6054	7.99091e-06	-1.06412	-0.604315	4.35058	5.1848	-2.4433	10.0637	0.0345108	-0.0925606	-0.00430292	3.76713	3.81556
PPP2R2A	-7.94582	10.4366	9.63695e-06	-1.56634	-0.883298	2.22744	3.45226	-2.93819	16.4853	0.00941441	-0.173984	-0.0283491	3.65331	3.75448
ZNF702P	-7.94018	10.9019	7.41578e-06	-2.47203	-1.39807	-0.0600863	1.87497	-2.385	17.9628	0.0283082	-0.125498	-0.00793818	3.00609	3.07281
RHPN2	-7.9264	11.9024	4.35213e-06	-3.9195	-2.2281	-4.19413	-1.12033	-2.6799	16.2912	0.0162482	-0.304081	-0.0356949	1.95133	2.12121
SLC29A4	-7.92582	16.7555	4.57336e-07	-3.80443	-2.2034	-3.14907	-0.145159	-4.25922	17.9998	0.000471915	-0.289388	-0.0982031	2.55764	2.75144
RPL39L	-7.92321	9.23239	2.05968e-05	-3.14872	-1.75423	-1.41016	1.04132	-2.22714	17.9573	0.0389723	-0.233646	-0.0067937	2.10187	2.22209
TUBB6	-7.92306	8.31254	3.77329e-05	-2.10313	-1.15967	4.97989	6.61129	-2.61146	17.9896	0.0176737	-0.16473	-0.0178436	3.98997	4.08126
POLR2C	-7.88903	12.6922	3.0375e-06	-0.761374	-0.433387	3.04023	3.63761	-2.81915	12.3673	0.0150969	-0.134594	-0.0174618	3.27293	3.34896
HGS	-7.82636	9.53089	1.89224e-05	-1.36575	-0.757278	3.52535	4.58687	-2.93455	17.8388	0.00891925	-0.129731	-0.0214361	3.63632	3.71191
MICB	-7.82204	7.9461	5.32696e-05	-4.32263	-2.35244	-1.07482	2.26271	-2.27452	15.0055	0.0380445	-0.152108	-0.0049415	2.80512	2.88364
DIAPH2	-7.82074	13.3692	2.39534e-06	-1.64403	-0.933905	1.38976	2.67872	-2.63984	10.0268	0.0246889	-0.327314	-0.027741	3.12351	3.30104
RAB3B	-7.81901	14.3382	1.53003e-06	-5.82843	-3.32355	-1.4426	3.13339	-3.69464	17.6773	0.00170116	-0.416617	-0.114313	3.15842	3.42389
TRAPPC1	-7.79491	16.3544	6.70948e-07	-1.18532	-0.679151	0.948358	1.88059	-3.17678	12.269	0.00777121	-0.14665	-0.027499	3.27796	3.36503
HNRNPAB	-7.77407	13.777	2.1147e-06	-1.53316	-0.869328	3.42859	4.62984	-2.48707	17.9211	0.0229633	-0.14479	-0.0121637	3.81922	3.89769
MPG	-7.76496	11.0901	8.24725e-06	-1.34177	-0.749566	1.47169	2.51736	-3.7567	10.2528	0.00358283	-0.171331	-0.0440261	3.31321	3.42089
LINC00607	-7.74965	12.5431	3.95336e-06	-2.08586	-1.17379	2.1845	3.81432	-3.14746	16.1887	0.00615745	-0.215675	-0.042172	3.48054	3.60946
NMT2	-7.73424	17.0477	5.65851e-07	-1.05236	-0.601343	2.70283	3.52968	-7.58899	17.9375	5.26747e-07	-0.29082	-0.164687	2.9739	3.20165
PDP1	-7.73124	18.9468	2.82597e-07	-0.966133	-0.554409	2.25187	3.01215	-5.41897	12.1055	0.000150559	-0.200169	-0.0854432	3.10666	3.24946
AREL1	-7.727	8.73438	3.45282e-05	-1.13473	-0.618936	2.94307	3.8199	-3.18335	14.0064	0.00663342	-0.13192	-0.0257166	3.36166	3.44048
TOR2A	-7.72299	8.10111	5.25156e-05	-1.79795	-0.972512	-0.178123	1.20711	-2.80658	17.6398	0.0118316	-0.144332	-0.0206502	2.72168	2.80418
DCUN1D5	-7.71354	19.3752	2.5184e-07	-1.25242	-0.718363	1.54396	2.52936	-2.22483	17.5548	0.0394658	-0.164349	-0.00455815	3.00224	3.0867
CMTM3	-7.70071	14.0529	2.07834e-06	-1.63558	-0.923175	2.18802	3.4674	-2.31044	13.7776	0.0368897	-0.199554	-0.00726868	3.51131	3.61472
ECHS1	-7.69985	10.9335	9.72371e-06	-1.45523	-0.807853	2.70011	3.83165	-3.41291	17.8088	0.00313975	-0.160635	-0.0381638	3.46919	3.56859
SPHK2	-7.687	9.32283	2.49226e-05	-1.80279	-0.986312	0.139594	1.53414	-2.52684	15.7008	0.0226592	-0.158078	-0.0137221	2.88462	2.97052
GPR3	-7.68399	10.2872	1.41911e-05	-2.7587	-1.52208	-2.94954	-0.809149	-7.48575	17.6658	7.00708e-07	-0.403339	-0.226368	1.66651	1.98136
FANCE	-7.68337	8.74963	3.57223e-05	-2.18867	-1.18966	-0.468315	1.22085	-2.3534	14.9052	0.0327577	-0.134098	-0.00659924	2.41769	2.48804
STUB1	-7.67518	15.068	1.38866e-06	-1.264	-0.714712	1.05207	2.04142	-3.45801	15.9697	0.00324604	-0.139158	-0.0333729	3.4073	3.49356
TXNL4A	-7.66102	8.71277	3.7398e-05	-1.39953	-0.758952	2.18848	3.26772	-3.4581	15.6518	0.00332823	-0.137157	-0.0327877	3.33724	3.42221
OSBPL10	-7.66016	21.1674	1.55579e-07	-2.00371	-1.14838	1.12793	2.70398	-9.00993	11.9399	1.1331e-06	-0.397046	-0.242341	3.02948	3.34917
CBX1	-7.65757	11.6594	6.97958e-06	-0.963859	-0.535779	2.84692	3.59673	-2.33502	13.7208	0.035283	-0.109386	-0.00454072	3.4202	3.47717
RALGPS2	-7.6562	13.4732	2.88956e-06	-1.87315	-1.05098	0.81701	2.27907	-10.0594	17.6192	1.0043e-08	-0.328658	-0.214949	3.05787	3.32968
HDLBP	-7.65073	16.9263	6.85618e-07	-0.606914	-0.344468	6.87307	7.34876	-2.24298	12.2835	0.0440771	-0.0713675	-0.00112687	4.60613	4.64238
AGPAT5	-7.64831	9.92863	1.81507e-05	-1.53507	-0.841921	2.1764	3.36489	-5.60656	17.5898	2.77315e-05	-0.220272	-0.100041	3.42518	3.58534
IDH2	-7.6439	10.3964	1.39813e-05	-2.20238	-1.21218	2.68746	4.39473	-4.39479	17.9894	0.000349908	-0.232971	-0.0822663	3.51456	3.67218
SNAPC2	-7.64035	8.32013	4.91364e-05	-1.51099	-0.813949	1.29555	2.45802	-2.48642	13.1402	0.0271077	-0.128257	-0.00906861	2.98576	3.05442
ANKRD1	-7.63329	10.2592	1.52887e-05	-5.23564	-2.87596	2.81705	6.87285	-2.61339	17.0475	0.0181406	-0.364847	-0.0389372	3.75021	3.9521
CEP89	-7.62209	9.00201	3.24728e-05	-1.16889	-0.633866	2.1616	3.06298	-2.11962	17.136	0.0489352	-0.108162	-0.000283336	3.11629	3.17051
NTMT1	-7.61521	8.76518	3.78927e-05	-2.39334	-1.29361	-0.964545	0.878932	-2.37982	17.4492	0.0289663	-0.136509	-0.0083429	2.75185	2.82428
COPB2	-7.59795	9.28953	2.7959e-05	-1.16387	-0.631775	4.58726	5.48508	-2.92331	17.1683	0.00940983	-0.109418	-0.0177249	3.93385	3.99742
[truncated: 797 more rows]

## Sheet: cord.up.flow.dow
	cord.statistic.t	cord.parameter.df	cord.p.value	cord.conf.int1	cord.conf.int2	cord.estimate.mean.of.x	cord.estimate.mean.of.y	flow.statistic.t	flow.parameter.df	flow.p.value	flow.conf.int1	flow.conf.int2	flow.estimate.mean.of.x	flow.estimate.mean.of.y
[truncated: 618 more rows]

[truncated: 1 more sheets: cord.down.flow.up]
