# Supplementary material for: Transcriptional drifts associated with environmental changes in endothelial cells
Source: eLife. 2023 Mar 27;12:e81370. doi: 10.7554/eLife.81370 (PMC10168696; doi:10.7554/eLife.81370)
Supplement: Supplementary file 6. [file elife-81370-supp6.csv]

	p_val	avg_logFC	pct.1	pct.2	p_val_adj
FABP4	0	0.926305725820491	0.573	0.215	0
FABP5	0	0.512370862450089	0.997	0.984	0
NME2	0	0.396522002353199	0.663	0.296	0
MIF	0	0.372772019260992	0.993	0.966	0
S100A10	0	0.317112890237661	1	1	0
TPT1	0	0.303460163419182	1	1	0
VIM	0	0.259690535552607	1	1	0
SNX3	0	0.236622289087077	0.995	0.982	0
PCBP2	0	0.23558845560528	0.998	0.994	0
C19orf43	0	0.235228579014796	0.997	0.991	0
SUB1	0	0.225938257706745	0.998	0.993	0
PFN1	0	0.20784665505799	1	1	0
BTF3	0	0.202707986968615	1	1	0
SUMO2	0	0.176935749861783	1	0.999	0
NACA	0	0.165400619532243	1	1	0
GAPDH	0	0.141841272966404	1	1	0
TGFBI	0	-0.140813201592974	0.023	0.191	0
CRYAB	0	-0.187200543298991	0.041	0.256	0
NDUFA4L2	0	-0.211561372236209	0.011	0.262	0
COL1A1	0	-0.223450432119007	0.005	0.271	0
COX6C	0	-0.224013527056236	0.996	0.998	0
SEC61G	0	-0.241043419606678	0.997	0.999	0
HSP90AB1	0	-0.246478378151078	0.998	0.999	0
FAU	0	-0.253840183336	1	1	0
COX6B1	0	-0.278101183338125	0.999	0.999	0
UQCR10	0	-0.282531411263521	0.966	0.985	0
CBX3	0	-0.283727007078742	0.861	0.928	0
LYL1	0	-0.286828980189299	0.187	0.489	0
COX7A2	0	-0.288190819063417	0.999	1	0
C14orf2	0	-0.288849039887199	0.997	0.999	0
IFITM2	0	-0.297674216576624	0.985	0.995	0
OST4	0	-0.299403161082164	1	1	0
SEC62	0	-0.304133576903515	0.842	0.919	0
DNAJC1	0	-0.306554947320776	0.371	0.631	0
MRPS21	0	-0.310441653042276	0.989	0.994	0
TSR3	0	-0.325977734141835	0.317	0.612	0
ATOX1	0	-0.326347382088706	0.983	0.994	0
SRRM1	0	-0.327380863826493	0.857	0.936	0
TCEB2	0	-0.330736734928673	0.998	1	0
NAA38	0	-0.332048747030849	0.96	0.985	0
MYEOV2	0	-0.334487837635044	0.989	0.996	0
AP2B1	0	-0.334986402268548	0.674	0.823	0
DDX18	0	-0.336426175133356	0.689	0.845	0
TMA7	0	-0.337752749937857	0.999	1	0
EVA1B	0	-0.340107162511958	0.86	0.942	0
KTN1	0	-0.349221776965451	0.849	0.938	0
PA2G4	0	-0.349391724987536	0.923	0.96	0
COX17	0	-0.35104912911946	0.796	0.899	0
COX7C	0	-0.3553042106565	1	1	0
UBL5	0	-0.35563691949521	0.997	1	0
FAM173A	0	-0.361884417581634	0.315	0.636	0
MIR4458HG	0	-0.363422054637286	0.333	0.574	0
ATP5J2	0	-0.363682129945522	0.982	0.992	0
EFHD2	0	-0.369261740256296	0.46	0.694	0
MRPL52	0	-0.378286827835029	0.949	0.981	0
TMEM256	0	-0.38183859605228	0.93	0.977	0
UQCRQ	0	-0.382455229074502	0.997	0.999	0
DDX21	0	-0.38395217169843	0.83	0.929	0
DPM3	0	-0.384681073014479	0.695	0.866	0
EIF2S2	0	-0.386336128461323	0.986	0.996	0
SRSF9	0	-0.388866716431172	0.883	0.954	0
TAGLN	0	-0.398724507362296	0.483	0.825	0
ITGB1	0	-0.399132076494695	0.973	0.988	0
METAP2	0	-0.409472228194939	0.854	0.94	0
RNF145	0	-0.414968027909466	0.365	0.703	0
ACTA2	0	-0.420101831410321	0.257	0.641	0
TOMM7	0	-0.420850429119777	0.998	1	0
SON	0	-0.423538904882718	0.892	0.958	0
NDUFA1	0	-0.427060412762384	0.97	0.992	0
S100A6	0	-0.428362967500501	1	1	0
TIMP1	0	-0.437052562700811	0.995	1	0
CLTB	0	-0.443864036700347	0.708	0.89	0
NMT1	0	-0.458229765371553	0.475	0.768	0
EIF5B	0	-0.465879792584662	0.908	0.966	0
SOX4	0	-0.466519994842039	0.949	0.982	0
NPDC1	0	-0.468633256232931	0.911	0.978	0
COX7A1	0	-0.470377416117909	0.562	0.782	0
ADIRF	0	-0.472166449183846	0.77	0.893	0
TMEM258	0	-0.472395614614567	0.993	0.999	0
AAK1	0	-0.473492115293202	0.566	0.796	0
USMG5	0	-0.479309742443164	0.992	0.999	0
EIF3J	0	-0.480932841555771	0.812	0.91	0
ATP5E	0	-0.484797071833169	1	1	0
RP11-350J20.12	0	-0.485169384851464	0.318	0.658	0
SMIM4	0	-0.493558484130208	0.487	0.772	0
DYNC1I2	0	-0.495105298083693	0.821	0.924	0
UQCR11	0	-0.512274753331944	0.997	1	0
YBX1	0	-0.518875939904473	0.999	1	0
PET100	0	-0.526288172734278	0.644	0.89	0
EBPL	0	-0.537491731730056	0.533	0.857	0
SLIRP	0	-0.547851237842408	0.955	0.99	0
POLR2L	0	-0.560514312723427	0.999	1	0
HEBP2	0	-0.58621441207185	0.893	0.979	0
ROMO1	0	-0.592139478510985	0.91	0.98	0
NDUFA3	0	-0.592607976903343	0.856	0.962	0
ATP5D	0	-0.654682386865152	0.979	0.998	0
SERPINE1	0	-0.662765395663928	0.889	0.986	0
CHCHD10	0	-0.664888775147175	0.364	0.805	0
IGFBP7	0	-0.713715742248298	0.95	0.992	0
NDUFB1	0	-0.726375400234876	0.901	0.986	0
C4orf48	0	-0.777480126003075	0.939	0.994	0
HES1	0	-0.827624158585612	0.755	0.906	0
ATP5I	0	-0.831156457637044	0.983	0.998	0
MT2A	0	-0.846291205127594	0.992	1	0
HIST1H4C	0	-1.11209376658285	0.744	0.94	0
GPX4	1.25833011933709e-304	0.189948241553456	1	1	3.04138389843775e-300
RALBP1	2.97723286771606e-304	-0.288275501480126	0.825	0.911	7.19597184126971e-300
CCL23	5.7061178013726e-304	-0.63893378680216	0.285	0.53	1.37916867259176e-299
SYCE1L	1.34942920772164e-301	-0.306856037937338	0.471	0.684	3.2615703950632e-297
ZFAS1	5.33019567659853e-299	-0.274800166871517	0.999	0.999	1.28830829503387e-294
CAV1	9.92823364940276e-299	0.269417461826911	1	0.999	2.39965407306065e-294
MARCKSL1	1.21768742884495e-294	0.271760204092109	0.997	0.993	2.94315051551824e-290
TPRKB	7.39251009090243e-293	0.283207091935107	0.88	0.746	1.78676968897112e-288
SNHG8	3.66586679116818e-288	-0.289971750205138	0.913	0.961	8.8604000342535e-284
PTMS	1.08393577423969e-286	-0.277200352070279	0.844	0.928	2.61987276633733e-282
BTG1	8.20223516839059e-285	-0.325578107577968	0.727	0.869	1.98248024020001e-280
IFITM3	3.52360034073757e-282	-0.245494479538392	0.999	1	8.5165420235627e-278
SLC25A6	4.41604806617821e-277	0.200528005644828	1	1	1.06735881759527e-272
COX5B	3.12331703671388e-270	-0.176061484505428	0.998	1	7.54905727773744e-266
TMSB10	7.44593207240203e-268	-0.145578098747865	1	1	1.79968178189957e-263
CARD8	2.82515835114385e-263	-0.304214017461672	0.866	0.922	6.82840773471468e-259
PGP	3.97258039123714e-263	-0.206933387959585	0.175	0.402	9.60172680562017e-259
ARF5	1.58474490528416e-261	0.272051453031127	0.817	0.617	3.83032843607182e-257
CEBPZ	3.9933376066683e-260	-0.250272552139887	0.323	0.551	9.65189699531727e-256
HNRNPAB	1.85294262821094e-258	-0.306212974076331	0.763	0.862	4.47856233238585e-254
C19orf24	1.12294768373119e-255	-0.261620210962589	0.787	0.886	2.7141645515783e-251
NENF	5.65110044495256e-255	-0.156698836328135	0.072	0.258	1.36587097754503e-250
CFL1	1.10366011070684e-253	0.143120793880912	1	1	2.66754648757842e-249
EIF1	1.16431070641297e-249	0.157406828498569	1	1	2.81413897740014e-245
OAZ1	5.98839049125141e-247	0.14659501761217	1	1	1.44739398173547e-242
NDUFB4	7.41054504201908e-246	-0.210125415347199	0.984	0.992	1.79112873665601e-241
SNHG9	6.54870623192123e-245	-0.226061873042694	0.238	0.463	1.58282229625536e-240
CXorf36	1.4338956928008e-243	0.295757650262938	0.809	0.627	3.46572588949952e-239
EIF3E	2.06740393996099e-243	0.237381440220064	0.999	0.997	4.99691532288571e-239
ACVRL1	7.96811612075468e-243	-0.267503187664309	0.878	0.946	1.92589366638641e-238
GNG11	8.66918857430494e-243	0.217680037214491	1	1	2.0953428784095e-238
S100A13	7.98832762484831e-242	-0.214311087590164	0.999	0.999	1.93077878692584e-237
SET	2.61172385767891e-241	-0.265775431925245	0.943	0.969	6.31253656400994e-237
UPF2	5.05237969393839e-241	-0.237814449717497	0.323	0.551	1.22116017202491e-236
THY1	6.02991794999815e-239	-0.113588371636584	0.027	0.171	1.45743116851455e-234
UBE2D3	6.67690881466007e-238	0.210430336489932	0.983	0.962	1.61380886050334e-233
MEF2C	7.26423527926117e-238	-0.284260523685001	0.373	0.588	1.75576566699743e-233
EEF1A1	2.85822537480191e-236	0.173451332636321	1	1	6.90833073089621e-232
NCL	3.67482655514033e-236	-0.316990947837787	0.915	0.964	8.88205578377419e-232
CDC42EP1	5.27640382360817e-236	0.263789156358671	0.868	0.739	1.2753068041661e-231
ZSCAN16-AS1	2.36407854524594e-235	-0.232628732532118	0.284	0.502	5.71397784385943e-231
RBM39	7.14793713419137e-234	-0.250257494320049	0.88	0.933	1.72765640533405e-229
CMTM8	4.12223628906356e-231	-0.221066665202315	0.208	0.425	9.96344511066662e-227
WDR43	7.72603748440604e-231	-0.257213391610047	0.393	0.6	1.86738325998094e-226
NDUFC1	1.39399718376957e-229	-0.223723784275934	0.915	0.954	3.36929119317106e-225
SAT1	4.3290176223474e-228	0.462228696445243	0.991	0.974	1.04632355932137e-223
MT1X	1.68837121011391e-227	-0.342991653865527	0.439	0.635	4.08079321484531e-223
WIPI2	3.27946954388848e-227	-0.239293846776006	0.489	0.679	7.92647788757846e-223
RGCC	4.02288727615959e-227	-0.338312102500194	0.407	0.612	9.72331854647774e-223
YTHDC1	4.19119295844305e-226	-0.251978472647071	0.472	0.667	1.01301133805569e-221
SHFM1	4.82765598550864e-226	-0.182536863127458	0.993	0.997	1.16684445169744e-221
FAM210B	2.33040428955912e-223	-0.242384736671477	0.409	0.616	5.6325871678644e-219
RRBP1	3.70197049540863e-223	-0.256696846414086	0.793	0.887	8.94766268740267e-219
PDCD2	2.76797622564097e-222	-0.239804428113628	0.546	0.719	6.69019853737423e-218
ACBD3	3.95312059109855e-222	-0.203169590850527	0.23	0.445	9.5546924686852e-218
TOMM40	2.65079489701564e-220	-0.238640997722711	0.409	0.609	6.4069712660868e-216
UBE2D2	6.03990429528348e-220	0.201514446011287	0.985	0.965	1.45984486817002e-215
CPE	7.22638132582222e-220	-0.291120431258335	0.549	0.721	1.74661636645123e-215
KRT8	1.90100824175431e-219	-0.251690698730978	0.801	0.889	4.59473692032016e-215
RBM3	1.53697643583929e-218	0.216138830407521	0.989	0.972	3.71487204542357e-214
BASP1	1.40833450773538e-217	-0.264124150077075	0.44	0.633	3.40394450519642e-213
CLEC14A	1.05094792902501e-216	0.359427703492616	0.993	0.989	2.54014114445344e-212
PRR34-AS1	2.83867882557303e-216	-0.253739198405657	0.332	0.533	6.86108672141001e-212
MALAT1	3.38966336950597e-216	-0.291989637129459	0.997	1	8.19281636409593e-212
IFI27L2	2.74125055902605e-215	-0.282864483975652	0.751	0.86	6.62560260116595e-211
SNRPF	3.92769871544879e-213	-0.239561890616925	0.962	0.977	9.49324779523973e-209
SDPR	1.3323064603319e-210	0.342652606419947	0.862	0.727	3.22018471462219e-206
MCAM	4.65362260114961e-209	-0.286342955597135	0.717	0.826	1.12478058269786e-204
CRIP2	4.83614439878313e-209	0.191126456238749	0.999	0.996	1.16889610118588e-204
LINC00116	1.64729837151237e-206	-0.255149500500208	0.688	0.805	3.9815201639454e-202
STMN1	3.96202719130157e-206	0.305173964811692	0.994	0.979	9.5762197213759e-202
DYNLL1	2.02837189376516e-203	0.214529570574159	0.999	0.995	4.9025748672304e-199
DSTN	2.93898522784635e-202	-0.16895413469757	0.999	0.999	7.10352729570463e-198
MTPN	8.41615530929725e-202	-0.226607281072822	0.841	0.903	2.03418473825714e-197
NDUFS5	4.10652920678704e-199	-0.149610558099595	0.999	1	9.92548109280428e-195
SNHG19	2.35928249004647e-197	-0.315918009250968	0.536	0.699	5.70238577844231e-193
COL1A2	7.58472344808728e-197	-0.11647290780618	0.076	0.244	1.8332276574027e-192
TDG	1.073244152367e-196	-0.234589269032957	0.501	0.67	2.59403111627103e-192
ENG	1.7452082294167e-196	-0.218984938726282	0.976	0.983	4.21816829050017e-192
ATP5L	1.26766416668311e-194	-0.139604303318535	1	1	3.06394429087307e-190
CWF19L2	4.4856663778255e-194	-0.155657922933014	0.134	0.316	1.08418556352042e-189
ZNF706	7.2927937337877e-194	0.192464709393661	0.987	0.972	1.76266824545649e-189
ATPIF1	1.61026652725169e-193	-0.181357444255427	0.991	0.993	3.89201419636735e-189
CMSS1	3.97319119996946e-189	-0.281361478611058	0.555	0.7	9.60320313032619e-185
BNIP3	3.62647586942531e-188	0.239508916265361	0.964	0.934	8.76519217640098e-184
COX7B	1.38689486153224e-186	-0.180107496951737	0.981	0.99	3.35212488032342e-182
ID3	2.67379682322787e-186	0.277484453736724	0.996	0.992	6.46256692174175e-182
RHOC	3.33289020067514e-186	0.156377822292576	1	1	8.0555956150318e-182
GRAMD1A	9.33432368017145e-186	-0.233554556716366	0.582	0.733	2.25610603349744e-181
SLC4A7	1.37459908457524e-185	-0.250110542987127	0.379	0.563	3.32240598741836e-181
WBP5	2.92201139752789e-185	-0.22536201049514	0.953	0.969	7.06250154782492e-181
TGFBR3L	8.68637947208311e-185	-0.119071740817746	0.056	0.198	2.09949791840249e-180
MMRN1	2.88146195687516e-184	-0.254936144818233	0.95	0.977	6.96449354976727e-180
RAC1	2.95087003649208e-184	-0.211496808574092	0.885	0.935	7.13225287820135e-180
LINC00520	4.25269360250039e-182	-0.244666709451858	0.107	0.272	1.02787604372434e-177
PRKCDBP	7.39492340338254e-179	0.266174737346736	0.965	0.93	1.78735298659756e-174
RNF7	3.32136087210297e-177	0.193608473278615	0.991	0.978	8.02772922787289e-173
ITGA5	3.86316236340553e-177	-0.242509430302778	0.948	0.969	9.33726343235117e-173
GJA4	7.19728513813674e-177	0.520924466225039	0.459	0.252	1.73958381788765e-172
IARS2	2.31961507576166e-176	-0.208851777201024	0.389	0.57	5.60650963811592e-172
TOPORS-AS1	2.56583732848156e-176	-0.204359393807984	0.327	0.516	6.20162882293993e-172
S100A16	4.96043223052611e-176	0.134391537999431	1	1	1.19893647011816e-171
SNHG25	1.43921317402291e-175	-0.222268089724211	0.463	0.643	3.47857824161336e-171
CENPV	1.84125835904414e-175	-0.11595241949585	0.065	0.208	4.4503214538097e-171
FSCN1	3.31059502731283e-175	0.214271723290379	0.978	0.945	8.00170818101512e-171
FXYD1	5.52836105552794e-174	-0.149074179016588	0.127	0.296	1.3362048671211e-169
CNN3	1.04930288109102e-173	0.223847821663764	0.921	0.851	2.536165063597e-169
USP53	4.1406821953438e-173	-0.198128345853949	0.233	0.419	1.0008028866146e-168
PRKDC	5.44473895270925e-173	-0.240085199478757	0.534	0.683	1.31599340486983e-168
TAF10	1.85824555201035e-172	-0.158516262748419	0.189	0.375	4.49137949920902e-168
CD59	6.84519539013198e-172	-0.231682127030018	0.998	0.998	1.6544837257949e-167
NUDT8	1.70320652768523e-170	-0.214214267618751	0.267	0.45	4.11665017741521e-166
ECI1	6.53835103996971e-170	-0.130667892362354	0.117	0.282	1.58031944636068e-165
SRPX2	9.74616157863657e-170	-0.223793574057663	0.528	0.687	2.35564725355646e-165
NUTF2	2.67847601327752e-168	0.169617999038683	0.984	0.967	6.47387652409177e-164
EEF1B2	2.92514325441163e-168	0.126808717567539	1	1	7.0700712459129e-164
NSRP1	5.90179300577432e-168	-0.218415653523763	0.507	0.666	1.42646336949565e-163
CD99	1.46322256662621e-166	0.139194525919943	1	1	3.53660894353554e-162
LARP1B	1.59088828137308e-166	-0.164265334783047	0.184	0.36	3.84517697607874e-162
ARL6IP4	1.04062607573384e-164	0.131511002288621	0.999	0.999	2.5151932250487e-160
MT1E	2.12872670134271e-163	-0.469733809999366	0.494	0.651	5.14513243714532e-159
MAFF	1.57280275401075e-161	-0.21455596071823	0.485	0.654	3.80146425644398e-157
CLDN5	4.04338141798881e-160	0.343671166073954	0.976	0.951	9.77285288727894e-156
ARPC1A	8.81929580027834e-160	0.17781903404488	0.987	0.973	2.13162379492727e-155
SERBP1	2.63105659038604e-159	-0.181186250469762	0.99	0.994	6.35926377896305e-155
NDN	3.77902959211028e-159	-0.188785995621225	0.324	0.501	9.13391452413055e-155
UBN1	3.86167643265338e-159	-0.196055080859995	0.38	0.555	9.33367193772321e-155
GNAI2	1.33680887417133e-158	-0.171227656103048	0.995	0.997	3.2310670488721e-154
TIMM8B	1.97325819230114e-157	-0.206416240404152	0.902	0.926	4.76936505079186e-153
C14orf166	1.9307997082699e-156	0.16377606964499	0.989	0.982	4.66674289488834e-152
ACTB	2.23272649056009e-156	0.161914616134395	1	1	5.39649992768373e-152
LARS	3.38639326754132e-156	-0.20772559612102	0.486	0.643	8.18491252764738e-152
FKBP8	1.64717911094715e-155	0.174192209137319	0.978	0.955	3.98123191115927e-151
UQCC2	2.30835212579698e-155	-0.206736000338582	0.882	0.929	5.5792870880513e-151
TPGS2	3.22890417841659e-155	0.18794577841149	0.956	0.913	7.80426139923291e-151
SNU13	3.51049701906616e-154	-0.158771832016912	0.993	0.994	8.48487129508291e-150
DDX1	5.93649153500793e-154	-0.231642667612363	0.587	0.716	1.43485000401142e-149
CALD1	7.18602071252468e-154	-0.228334731978058	0.981	0.993	1.73686120621721e-149
TCF25	4.30713493397718e-153	-0.201286263734435	0.888	0.937	1.04103451354228e-148
PPP1R14B	5.08750291869389e-153	-0.197696305334816	0.902	0.947	1.22964945544831e-148
SNRNP27	8.11620315379156e-153	-0.212169433556775	0.532	0.662	1.96168630227142e-148
SREK1IP1	2.27774945272635e-152	-0.200464427614449	0.659	0.768	5.50532042723958e-148
DDX24	3.68203978260588e-152	-0.205070189273521	0.776	0.86	8.89949015455841e-148
MACROD1	1.03793066109209e-151	-0.184848235017668	0.351	0.526	2.50867840785958e-147
PNRC1	1.97621580665811e-151	-0.189116340268159	0.263	0.442	4.77651360469266e-147
COTL1	2.68500809757258e-150	-0.20978410745729	0.575	0.719	6.48966457183291e-146
RCN2	3.06393317927854e-150	-0.202868376325858	0.554	0.691	7.40552649431623e-146
PFDN4	6.67262434515554e-150	0.182771776767689	0.933	0.861	1.61277330422409e-145
ZFP36L1	2.85981172787587e-149	-0.231216460460261	0.695	0.798	6.91216494627597e-145
PLEKHA3	5.27680766959857e-149	-0.167967403137217	0.272	0.451	1.27540441374198e-144
APP	2.0959767398302e-148	-0.181827615273283	0.978	0.991	5.06597578016958e-144
OAZ2	1.06902482605702e-147	0.206542721453832	0.9	0.824	2.58383300457982e-143
KHDRBS1	2.05660902022275e-147	-0.196435385347868	0.727	0.817	4.97082400187838e-143
UBA52	3.32133021202139e-146	-0.105230641234828	1	1	8.0276551224557e-142
AP3S1	3.5265420621141e-146	0.176958429859736	0.95	0.907	8.52365216412978e-142
COX8A	4.8338021665263e-146	-0.151127767187502	0.996	0.996	1.16832998364941e-141
HEY1	1.24630493034656e-145	0.32183135666533	0.643	0.467	3.01231901664764e-141
TAF11	1.26316800375293e-145	-0.198627280982617	0.588	0.716	3.05307706507083e-141
TIMM44	5.82384850498122e-145	-0.19550740811791	0.381	0.543	1.40762418365396e-140
TYMP	1.9679915249353e-142	-0.147610938675145	0.168	0.33	4.75663551576863e-138
CAV2	3.15047863536174e-142	0.205465583582352	0.949	0.896	7.61470686166932e-138
CAST	2.97707297479086e-141	-0.201000871810229	0.771	0.848	7.19558538006951e-137
SHOC2	1.07853578387582e-140	-0.170147387546409	0.275	0.445	2.60682098962785e-136
SUMO1	2.29812633310357e-140	0.170561335974761	0.956	0.916	5.55457134711132e-136
PRPF4B	4.21275255986907e-140	-0.186396492444254	0.389	0.556	1.01822229372035e-135
BRD9	7.55305923343201e-140	-0.177615595145168	0.314	0.478	1.82557441672052e-135
NGFRAP1	1.89970174231991e-139	0.14143482713847	0.999	0.998	4.59157911118722e-135
NAMPT	7.40802696696765e-139	-0.220805446402259	0.834	0.891	1.79052011791608e-134
TMEM203	1.41455063002392e-138	-0.158798334480971	0.276	0.445	3.41896887276781e-134
MRPL33	1.5413463082403e-137	-0.174988446194731	0.898	0.933	3.7254340270168e-133
ARHGDIA	1.6044874424432e-137	0.186289914165333	0.963	0.928	3.87804614838521e-133
EGFL7	2.08533818099803e-137	0.183183080243857	0.998	0.996	5.04026238347223e-133
HSPG2	3.29182954620103e-137	0.210355970732435	0.995	0.994	7.95635201316788e-133
PIN4	2.55668566965633e-136	-0.185961744251607	0.817	0.869	6.17950926355934e-132
CTD-3252C9.4	6.82690428977883e-136	0.199447705485062	0.481	0.301	1.65006276683954e-131
FNDC4	2.1876284625595e-135	-0.154587906061179	0.231	0.398	5.2874979940063e-131
SDF4	2.30676364661404e-135	-0.189012567832749	0.685	0.783	5.57544773386614e-131
COMMD6	4.21229007834251e-135	-0.151950568318257	0.997	0.998	1.01811051193539e-130
BOLA2B	1.04147075122062e-134	-0.115810493722024	0.114	0.256	2.51723480570025e-130
SMCR5	2.21247947773272e-134	-0.130653949311876	0.103	0.241	5.34756289767999e-130
YWHAH	2.71223330904245e-134	-0.218645644747857	0.495	0.627	6.55546790795561e-130
WDR70	1.16869277157629e-133	-0.159525847384001	0.257	0.421	2.82473042889989e-129
HNRNPA0	3.49129717066158e-133	0.162908719239658	0.966	0.923	8.43846526148905e-129
POLR2I	3.98549750020164e-132	-0.167115225015011	0.932	0.952	9.63294745798736e-128
SRM	5.73942947301259e-132	-0.204991580525941	0.64	0.741	1.38722010362714e-127
PABPC1	4.36092799731208e-131	0.154720412985982	1	1	1.05403629695033e-126
RNF213	5.29134996214473e-131	-0.185929591023895	0.534	0.679	1.27891928585038e-126
PPDPF	6.83694647238872e-131	0.12958281549604	0.999	0.999	1.65248996237635e-126
GDF15	1.42008596842826e-130	-0.333561348192707	0.753	0.849	3.4323477856911e-126
SUPT16H	7.15822404278663e-130	-0.196261922708203	0.443	0.592	1.73014275114153e-125
ITGB1BP1	8.66065021898307e-130	0.186231986307907	0.944	0.909	2.09327915792821e-125
RTF1	9.84282038717074e-130	-0.177418451738426	0.863	0.906	2.37900968757917e-125
SLC25A3	2.70224718239411e-129	0.123373562430728	0.999	1	6.53133143984657e-125
TXNDC17	2.71467884011331e-129	-0.163306474190444	0.97	0.98	6.56137875655386e-125
NPM1	3.05710812523166e-129	0.13084628789428	1	1	7.38903033868491e-125
APLP2	2.6977396678959e-128	-0.176115104217905	0.981	0.989	6.5204367773044e-124
SH3BGRL3	5.905411695116e-128	0.148957393202783	1	1	1.42733800670954e-123
GNB2L1	1.95956347214106e-127	0.111749076721352	1	1	4.73626491216495e-123
IPO11	2.48579580062612e-127	0.189012562392903	0.716	0.574	6.00816845011332e-123
RGS3	5.41967869539391e-127	0.225440062632361	0.804	0.68	1.30993634067671e-122
LDHA	1.88235303694088e-126	0.220777982290564	0.997	0.994	4.54964729028611e-122
NDUFV3	6.53681592926341e-126	-0.181159535895664	0.553	0.686	1.57994841010297e-121
SLC25A33	6.70297614017952e-125	-0.110451482232025	0.118	0.258	1.62010933308139e-120
ZCCHC10	6.79815791014182e-125	-0.16738807991628	0.336	0.491	1.64311476688128e-120
SPTY2D1	7.88074028548729e-125	-0.139670459872647	0.203	0.359	1.90477492700228e-120
SEPW1	8.90558622754025e-125	0.163759289058775	0.997	0.996	2.15248019119648e-120
PYURF	2.3511942086001e-124	0.17413367203983	0.926	0.863	5.68283640218644e-120
SSBP1	3.48109160538334e-124	0.156702250535142	0.98	0.961	8.41379841021154e-120
RNASEK	3.58777998725374e-124	0.125799858507301	0.309	0.152	8.67166422919229e-120
C8orf4	5.82436020720718e-124	0.268813677154578	0.797	0.697	1.40774786208198e-119
AKAP9	2.94677383984311e-123	-0.186557767917255	0.485	0.627	7.1223523709008e-119
TAF1D	1.68205137601064e-122	-0.187403203163598	0.88	0.927	4.06551817581771e-118
SIVA1	5.78114163653214e-122	0.161421211145318	0.99	0.975	1.39730193354982e-117
YAF2	7.37430214487526e-122	-0.164292720967656	0.36	0.513	1.78236882841635e-117
UBE2J1	1.67323676521066e-121	0.186504837810015	0.794	0.675	4.04421326151417e-117
NDUFB2	3.03974398261755e-121	-0.139230876891	0.988	0.988	7.34706120598662e-117
SRSF3	4.1788392345073e-121	0.214388142850698	0.967	0.947	1.01002544298042e-116
IFITM1	7.95542415093448e-121	0.216844201895495	0.448	0.281	1.92282601728086e-116
DHX40	2.44727253313115e-120	-0.111285346908571	0.118	0.254	5.91505771257798e-116
CHCHD2	3.09038229262329e-120	0.118792926952781	1	1	7.46945400127049e-116
GTF2A2	1.12138659141223e-119	0.164926529344978	0.929	0.885	2.71039139144336e-115
RFC1	3.0758619520927e-119	-0.177790604416044	0.432	0.579	7.43435833820807e-115
AFG3L2	4.05886875867038e-119	-0.145234416160494	0.257	0.414	9.81028578970632e-115
TMA16	4.06587686511369e-119	-0.193943347314243	0.585	0.696	9.82722438297979e-115
LIMA1	5.1034153734349e-119	-0.188564195709791	0.47	0.612	1.23349549575921e-114
LSM3	5.56791949523304e-119	0.173005528285167	0.948	0.9	1.34576614199782e-114
EGR1	2.10111493335695e-118	-0.159272146516038	0.198	0.353	5.07839479392375e-114
EIF3F	8.46637931450555e-118	0.146639582340333	0.999	0.998	2.04632388031599e-113
WSB1	5.35432335999216e-117	0.290872705702601	0.898	0.856	1.29413995611011e-112
HMGN3	3.39961283976936e-116	0.186859400434961	0.951	0.918	8.21686423372255e-112
SH3BGRL	8.66887777074247e-116	0.181753319020074	0.835	0.735	2.09526775718845e-111
BCL7C	1.75065152843311e-115	-0.173944325816932	0.597	0.716	4.23132474422283e-111
PGLS	7.34975241180717e-115	0.183517644140124	0.98	0.968	1.77643515793379e-110
NCOA7	3.31156710695005e-114	-0.157164051062327	0.257	0.412	8.00405769749828e-110
PAK2	6.23278811079233e-114	-0.179869920812857	0.674	0.769	1.50646488637851e-109
POMP	2.24670641662916e-113	0.135056258519453	0.996	0.992	5.43028940899268e-109
RSRC2	8.43876105884211e-113	-0.185204531556497	0.614	0.719	2.03964854792214e-108
APOA1BP	1.77860766870913e-112	0.196695480402353	0.955	0.931	4.29889473526997e-108
MTCH1	1.60828898403088e-111	0.14817150401256	0.97	0.95	3.88723447440263e-107
GLTSCR2	3.6371767624554e-111	0.159334184201019	0.998	0.995	8.79105623485471e-107
CDK2AP2	4.79188521552395e-111	0.183391246342361	0.745	0.625	1.15819865659214e-106
NME4	1.2863941714017e-110	0.153000902993475	0.992	0.984	3.1092147122779e-106
CCNI	1.41353632432209e-110	0.152768671669236	0.995	0.992	3.41651729588649e-106
UBTD1	2.4585563690524e-110	0.185765838315642	0.836	0.731	5.94233074399965e-106
MYL12A	3.8163458110961e-110	0.149008924522063	1	1	9.22410782541927e-106
EMCN	5.0311516455302e-110	0.198013845285911	0.899	0.838	1.21602935272465e-105
PDLIM2	6.00878591141792e-110	0.181723621578716	0.946	0.916	1.45232355478971e-105
HIST2H2AC	4.70607587422409e-109	-0.113014865622993	0.06	0.161	1.13745853879996e-104
RAI14	6.19958256736592e-109	-0.175836215960388	0.84	0.893	1.49843910653234e-104
GSPT1	1.11730398218792e-108	-0.168982805835049	0.53	0.65	2.7005237249482e-104
ITGA2	3.18335924947601e-108	-0.205021659897888	0.51	0.625	7.6941793059835e-104
ANKRD11	4.34116381728715e-108	-0.182003025223966	0.687	0.778	1.04925929463831e-103
PGAM1	1.11879991941109e-107	0.153152590855559	0.995	0.988	2.70413940521661e-103
MX1	5.23238423044683e-107	0.248836016768261	0.633	0.48	1.264667268499e-102
PTMA	5.58489245708515e-107	-0.106646909035562	1	1	1.34986850687748e-102
GADD45B	9.40018073314486e-107	0.246555079858392	0.844	0.738	2.27202368320111e-102
C19orf70	3.05104006071858e-106	-0.139611212704295	0.961	0.973	7.37436382675682e-102
MAP7D3	3.11705586974778e-106	-0.143504174939206	0.258	0.403	7.53392403718039e-102
EEF2	4.35315476289525e-106	0.168163601603727	1	1	1.05215750619178e-101
KNOP1	1.20095467311324e-105	-0.175515089936163	0.581	0.691	2.90270744491469e-101
VIMP	1.69002101667718e-105	-0.169159358140625	0.795	0.861	4.08478079730875e-101
UFM1	2.63849166902712e-104	-0.165327917198613	0.672	0.758	6.37723436403855e-100
PDXK	1.63113609622925e-103	-0.164662950790187	0.416	0.551	3.9424559445861e-99
COX5A	1.98318540810817e-103	0.105445212519241	0.999	0.998	4.79335913139744e-99
ACTG1	3.9053556179244e-103	0.109218684385576	1	1	9.43924452852328e-99
IQGAP1	9.50393955319975e-103	-0.173672318182049	0.581	0.684	2.29710219000838e-98
UQCRB	9.54727895494429e-103	0.116552183074009	1	0.999	2.30757732341004e-98
H2AFZ	1.28714973281967e-102	0.258180925298088	0.996	0.992	3.11104090422515e-98
ID1	2.70853467579412e-101	0.176436180925247	0.997	0.997	6.5465283113944e-97
ABCF1	3.69855749772871e-101	-0.169792660279749	0.63	0.73	8.93941347201028e-97
SNRPG	4.18034611287894e-101	-0.166878573687814	0.985	0.987	1.01038965548284e-96
RALB	9.04079062118829e-101	0.180180817629177	0.777	0.65	2.18515909314121e-96
C8orf33	7.28579968884268e-100	-0.161702892209562	0.463	0.592	1.76097778479328e-95
NDUFAF2	3.62512223031046e-99	-0.16998571234051	0.654	0.744	8.76192043066039e-95
CCNG1	8.64198404329223e-99	0.176606340067198	0.897	0.828	2.08876754326373e-94
SRPX	4.86162476387032e-98	-0.175697004267434	0.9	0.937	1.17505470542746e-93
UBE2H	6.86658268159753e-98	-0.162006842777156	0.566	0.682	1.65965303414212e-93
CAPN2	1.26597293670866e-97	0.167922432289966	0.863	0.782	3.05985658802482e-93
PRPF6	1.48494309495911e-96	-0.164720519359929	0.616	0.714	3.58910746051617e-92
PDCD11	4.49619389847594e-96	-0.131757960977312	0.226	0.362	1.08673006526164e-91
SORBS3	9.98698214735674e-96	0.160693089476646	0.73	0.62	2.41385358501612e-91
ENY2	4.89114358452096e-95	0.131020017249853	0.992	0.986	1.18218940437872e-90
EFNA1	1.01040163272463e-94	0.197207703489626	0.623	0.485	2.44214074629544e-90
GOLGA2	1.48809000040491e-94	-0.150909777996204	0.379	0.516	3.59671353097868e-90
ID2	8.92557507839777e-94	0.253467158345713	0.804	0.695	2.15731149644874e-89
MLF2	2.44410741739116e-93	0.149531927081688	0.937	0.897	5.90740762783444e-89
YWHAQ	2.52241400911625e-93	0.138819972534718	0.97	0.958	6.09667466003398e-89
MTRNR2L8	2.86642228702116e-93	-0.157864493401378	0.221	0.349	6.92814266773016e-89
SF3A2	3.08711102789054e-93	0.1543902640218	0.707	0.582	7.46154735441144e-89
SNRPD2	3.83512138925463e-93	-0.101877601826055	0.998	0.998	9.26948839782844e-89
SRRM2	9.93127975510759e-93	-0.142778528558536	0.952	0.968	2.40039031680951e-88
SARAF	3.57419971137514e-92	0.146372921649073	0.945	0.911	8.63884070239371e-88
HNRNPA1	5.72188687844102e-92	0.119396715950276	1	1	1.38298005851919e-87
CHCHD7	9.35365676573912e-92	-0.153294032799843	0.577	0.683	2.26077884027914e-87
RHOBTB3	9.82526230829845e-92	-0.123647081283202	0.233	0.365	2.37476589991574e-87
SHISA5	2.28127605620974e-91	0.152081962684059	0.918	0.858	5.51384422785895e-87
EDN1	2.94545248583138e-91	0.202453235911413	0.968	0.932	7.11915865825444e-87
MPST	9.2207797928464e-91	0.14079237290307	0.979	0.959	2.22866247593098e-86
PHLDA3	1.21894197244388e-90	-0.17554181809715	0.499	0.614	2.94618274739687e-86
SRP9	1.33421223080611e-90	0.148580748094551	0.94	0.899	3.22479096185838e-86
AIF1L	2.19106012641827e-90	0.130947197272735	0.39	0.242	5.29579232555295e-86
TXNL1	3.49181404896639e-90	0.151360293301335	0.894	0.832	8.43971455635178e-86
TPI1	8.83202977576512e-90	0.119693269908076	1	1	2.13470159680243e-85
STAG2	9.20019821333732e-90	-0.135243128845622	0.293	0.428	2.22368790816363e-85
OSTC	1.13259247016758e-89	0.125962294285127	0.99	0.986	2.73747600039505e-85
NFU1	1.28009042756698e-89	0.143820084179925	0.757	0.645	3.09397856342938e-85
UBE2N	1.55535104590525e-89	0.15253415824093	0.876	0.805	3.75928347795298e-85
JTB	1.8397591186748e-89	0.137467834164004	0.974	0.95	4.446697789837e-85
KXD1	1.84050603004026e-89	0.140091143825254	0.921	0.87	4.44850307460731e-85
MAF1	1.95004177212467e-89	0.141741027326201	0.889	0.821	4.71325096322533e-85
EPN2	3.54836442206207e-89	-0.127826693090854	0.248	0.382	8.57639680812403e-85
NDUFA2	3.80585789605328e-89	-0.132904232269731	0.943	0.956	9.19875853476077e-85
TCF4	5.70437917162303e-89	-0.182438587538246	0.936	0.963	1.37874844578129e-84
TCEAL4	1.0575831533317e-88	-0.154014991854173	0.886	0.922	2.55617848160271e-84
ENSA	1.16603870170026e-88	0.14188642101044	0.884	0.821	2.81831554200953e-84
CCL14	1.27042244849821e-88	0.263748617375692	0.625	0.499	3.07061105802017e-84
CFAP97	1.36677223296663e-88	-0.141418461773359	0.356	0.486	3.30348848708035e-84
STRAP	1.93969400696005e-88	0.139790552667277	0.929	0.877	4.68824041482244e-84
RAP1A	3.04351156801979e-88	0.148153054200265	0.757	0.646	7.35616745990382e-84
VDAC3	3.13993484545941e-88	0.156915307445528	0.802	0.714	7.58922252147538e-84
TAF9	6.94533180436241e-88	0.147300209523593	0.848	0.768	1.67868669711439e-83
FXYD6	7.21655532678854e-88	0.196203911114556	0.61	0.474	1.74424142248479e-83
ADSS	9.81155921187368e-88	-0.163207708012327	0.769	0.829	2.37145386150987e-83
CD34	1.60741987814541e-87	0.249928530905865	0.285	0.156	3.88513384547747e-83
LSM1	1.76009194664732e-87	0.145690488846459	0.841	0.766	4.25414223504658e-83
SEP15	2.65127311907654e-87	0.147402634813534	0.835	0.749	6.40812712880799e-83
SPOCD1	9.27942795193621e-87	-0.169135644099654	0.517	0.64	2.24283773598298e-82
SRGN	2.60379624925193e-86	-0.17105139016132	0.979	0.992	6.2933755344419e-82
BNIP3L	3.69898383347321e-86	0.164785857083993	0.883	0.814	8.94044392550476e-82
BIRC2	3.92449167629765e-86	-0.150316717703247	0.422	0.544	9.48549638161142e-82
SF3B2	1.65104038096167e-85	-0.148429316212175	0.87	0.901	3.99056460078435e-81
IFI44L	3.37273355868606e-85	0.277037016655509	0.611	0.487	8.1518970113442e-81
STAU1	3.89970198793817e-85	-0.14911209931307	0.688	0.77	9.42557970484656e-81
MALL	4.0644546205686e-85	0.188942429277904	0.714	0.61	9.82378681791429e-81
KIAA0355	5.03669142406365e-85	-0.156948576657176	0.43	0.555	1.21736831719618e-80
NARS	5.66461845475824e-85	-0.161138084732276	0.503	0.607	1.36913828051507e-80
FAM195B	9.35559509376674e-85	0.142679640082404	0.924	0.875	2.26124733416342e-80
FAM50A	1.77907227848542e-84	-0.150431940932831	0.674	0.754	4.30001769709925e-80
HPCAL1	1.78463884484156e-84	-0.149663686749323	0.513	0.624	4.31347208798204e-80
PFDN2	1.14500723617108e-83	-0.14086371268543	0.963	0.971	2.76748248982549e-79
IL1RL1	1.50103473448639e-83	-0.301132743870032	0.443	0.564	3.6280009532536e-79
ABRACL	2.309172880878e-83	0.144344134152925	0.926	0.872	5.58127085308213e-79
BRI3	2.71273280831815e-83	-0.163782292734886	0.643	0.726	6.55667519770497e-79
TMSB4X	3.54107004930221e-83	0.126084102494376	1	1	8.55876630916344e-79
MANF	3.68940599429524e-83	0.169448113402844	0.874	0.805	8.9172942882116e-79
CDK11B	1.45154636098211e-82	-0.128235639471352	0.295	0.421	3.50838755449375e-78
SYAP1	2.76896175268966e-82	-0.148294632597612	0.572	0.664	6.69258055625092e-78
CALM3	3.27859087166085e-82	0.137901640210129	0.977	0.95	7.92435413680427e-78
RRP36	5.48594245445086e-82	-0.144899771731586	0.482	0.587	1.32595229124077e-77
CTXN1	6.50434303806672e-82	-0.143721704786989	0.42	0.545	1.57209971230073e-77
RP11-783K16.5	9.27432030959931e-82	-0.121775928078462	0.244	0.369	2.24160321883015e-77
METTL9	1.01019865811936e-81	0.134457727277097	0.931	0.887	2.44165015667448e-77
MGP	1.12629931010454e-81	-0.339834929152545	0.999	0.999	2.72226543252267e-77
HIST1H1C	1.81765353526254e-81	-0.159182881195538	0.237	0.357	4.39326859472955e-77
TLN1	3.45653341644173e-81	-0.158565107979208	0.799	0.843	8.35444126753967e-77
TPR	5.14802134981967e-81	-0.16425882690368	0.705	0.773	1.24427676025141e-76
ERLEC1	8.02829385866644e-81	-0.148104804639426	0.558	0.661	1.94043862563968e-76
LUC7L3	2.71088867913309e-80	0.142187686774926	0.812	0.727	6.55221793746468e-76
NMT2	3.30257273143271e-80	-0.18343263356684	0.439	0.548	7.98231829187285e-76
FKBP11	5.75857789818445e-80	-0.153528463744638	0.613	0.702	1.39184827799118e-75
ICAM1	9.08563771322376e-80	-0.127526832476172	0.128	0.238	2.19599863528618e-75
RSPO3	9.11561665273167e-80	-0.110728215219704	0.154	0.266	2.20324454496524e-75
OLA1	1.40277223958582e-79	0.134792497954047	0.897	0.836	3.39050050307893e-75
BANF1	1.5104152524149e-79	0.131816802061733	0.98	0.966	3.65067366508681e-75
CNOT4	4.45900977635822e-79	-0.133417017987198	0.353	0.478	1.07774266294578e-74
SYF2	8.44557509740559e-79	-0.147625935235744	0.84	0.882	2.04129550104293e-74
GTF3C6	1.1783635989491e-78	0.143768343202106	0.901	0.845	2.84810481865998e-74
IFIT1	2.26191459055887e-78	0.167219344429068	0.286	0.162	5.46704756538079e-74
MYH10	2.3605675809665e-78	0.16838655763193	0.635	0.514	5.70549184319603e-74
IFI44	3.0231517743608e-78	0.140372044042112	0.452	0.313	7.30695783863004e-74
TCEA1	7.24195468183694e-78	-0.151089416874072	0.728	0.797	1.75038044659999e-73
OAS3	8.38468919272054e-78	0.116772336164612	0.299	0.173	2.02657937788055e-73
TOMM5	5.45344823913595e-77	-0.166544545397531	0.685	0.741	1.31809843939916e-72
DAAM1	7.2455542696346e-77	-0.178667206756095	0.459	0.567	1.75125046697068e-72
PTPN12	1.19677687013892e-76	-0.149202348426563	0.709	0.778	2.89260969512578e-72
ANXA1	1.75580725936017e-76	0.199622077508565	0.948	0.914	4.24378614587354e-72
CD55	2.25258144512885e-76	-0.171336349713533	0.761	0.816	5.44448935287642e-72
ELF2	3.24166956614218e-76	-0.111807217373224	0.24	0.366	7.83511534136564e-72
UBE2V2	3.67817031904272e-76	0.133779686589979	0.683	0.573	8.89013766112624e-72
GALNT1	1.95267947813514e-75	-0.152946186925757	0.791	0.839	4.71962629865262e-71
CYR61	5.90182092787376e-75	0.228892837323985	0.925	0.879	1.42647011826709e-70
CCDC90B	8.83552477375768e-75	0.133383740945554	0.817	0.73	2.13554633781723e-70
STX2	1.494289329796e-74	-0.117613291490427	0.259	0.381	3.61169731011694e-70
HP1BP3	1.9803222727402e-74	-0.146941824595984	0.654	0.737	4.78643893321307e-70
C5orf24	2.16250350434294e-74	-0.142775231889491	0.614	0.704	5.22677096999689e-70
PPFIBP1	2.81902491757689e-74	-0.147530258081661	0.67	0.747	6.81358322578334e-70
HERC2	3.10606931395165e-74	-0.126136873076399	0.299	0.423	7.50736953182114e-70
MRPS5	4.42357959151642e-74	-0.137199624512701	0.714	0.779	1.06917918726952e-69
GNG5	1.12809208118325e-73	0.103076851990429	0.999	0.998	2.72659856021991e-69
PLAUR	1.15977772926236e-73	-0.164353225503848	0.682	0.764	2.80318277162711e-69
JAK1	5.87811596812464e-73	-0.143893433411094	0.716	0.782	1.42074062949572e-68
SSR4	6.14250657807228e-73	-0.101411121644922	0.999	1	1.48464383992007e-68
H1FX	7.57695921943729e-73	-0.140792473099812	0.362	0.483	1.83135104333799e-68
CDKN2D	8.63481176726746e-73	-0.134671476253817	0.197	0.306	2.08703400414855e-68
CALR	1.03607849002161e-72	0.151928935991423	0.988	0.983	2.50420171038223e-68
SORBS2	1.18989187186045e-72	0.139845886563961	0.348	0.225	2.87596865428671e-68
PSMD9	2.27760178390353e-72	0.121034462388436	0.537	0.409	5.50496351169484e-68
BACE2	2.90997828808427e-72	-0.164342126359575	0.476	0.583	7.03341752229968e-68
SNRPB2	3.17828266005767e-72	-0.141999032851211	0.891	0.923	7.68190918935939e-68
XPC	3.63363617556999e-72	-0.126364276735005	0.303	0.419	8.78249863635266e-68
DAPK3	3.86140047663528e-72	0.133897807730366	0.718	0.609	9.33300495202746e-68
NUDT14	2.78499395058366e-71	0.130893036927233	0.953	0.926	6.73133037856072e-67
UPP1	3.01481519213946e-71	-0.138418410906484	0.782	0.843	7.28680831940109e-67
RNF5	3.51333158130545e-71	0.137086056128906	0.791	0.708	8.49172243201526e-67
SERTAD4-AS1	3.7772731334859e-71	0.122699895219028	0.384	0.253	9.12966916363542e-67
UBE2E1	4.56607010443752e-71	0.132520093967782	0.777	0.69	1.10361914424255e-66
C1orf21	4.71296924293224e-71	0.164902494871206	0.62	0.513	1.13912466601672e-66
CDC26	6.03415795464376e-71	0.129207803983912	0.759	0.658	1.4584559776374e-66
UCHL1	7.00229343986375e-71	0.195442303021112	0.936	0.913	1.69245432441507e-66
SYNRG	1.04296694467964e-70	-0.101061434365128	0.21	0.326	2.52085110529068e-66
STK25	1.28151929583915e-70	0.132796517102556	0.867	0.803	3.09743213804323e-66
FBXW5	1.46483162495249e-70	0.12809124608994	0.779	0.691	3.54049803751017e-66
IFNGR2	1.75642400532842e-70	-0.135842225377892	0.54	0.641	4.24527682087878e-66
NFE2L2	2.11948836592571e-70	-0.151571367563612	0.543	0.632	5.12280338044245e-66
NPW	2.168413412106e-70	-0.173402383752429	0.219	0.328	5.24105521706019e-66
LMAN1	2.91484425188586e-70	-0.151306538016049	0.689	0.753	7.04517855680812e-66
TNIP1	3.44548238359151e-70	0.122878980455462	0.631	0.497	8.32773092114069e-66
SVBP	7.7485925921473e-70	0.126872061521739	0.637	0.514	1.872834829522e-65
COPS2	8.62430932733909e-70	0.128204108350405	0.609	0.488	2.08449556441786e-65
PCGF5	3.02543324895025e-69	0.112247819355936	0.42	0.293	7.31247216271275e-65
VASH1	4.47874218122312e-69	0.172737194380737	0.492	0.372	1.08251198520163e-64
TMEM243	5.99743461012878e-69	0.128898369356202	0.548	0.42	1.44957994526813e-64
NES	9.64594020627498e-69	-0.155436424106104	0.608	0.683	2.33142374785666e-64
NDUFV2	1.34259494454381e-68	0.109870540727623	0.978	0.968	3.24505198096239e-64
GSTO1	1.61173549826195e-68	0.123639270120795	0.994	0.992	3.89556469929913e-64
HNRNPK	2.60694554033779e-68	0.116638436140058	0.978	0.969	6.30098737099645e-64
EIF3L	3.09943943728702e-68	0.119875429563988	0.993	0.985	7.49134511992274e-64
EHD2	3.29084868575685e-68	0.12999490332696	0.8	0.707	7.95398127347432e-64
TNRC6B	3.79382084596288e-68	-0.139790614684123	0.467	0.574	9.16966498469229e-64
LAMA4	5.10982646018783e-68	0.131687246945009	0.965	0.942	1.2350450554274e-63
CAPNS1	6.63338974289121e-68	-0.12700447013526	0.892	0.922	1.60329030085681e-63
TJP1	1.43028046577485e-67	-0.136307610201209	0.536	0.632	3.4569878857778e-63
TXNDC9	2.22834474815279e-67	0.13163005149859	0.723	0.634	5.38590925628529e-63
TRA2B	3.61790275221126e-67	-0.142486349951022	0.655	0.729	8.74447095209462e-63
SKA2	4.82781893318403e-67	0.146077466295015	0.518	0.406	1.16688383615058e-62
ACSM3	6.72215919571653e-67	0.159189836133775	0.404	0.278	1.62474587760468e-62
CXCL8	7.97615002594032e-67	0.307581111273016	0.395	0.288	1.92783546126977e-62
MDFI	1.07587112685877e-66	0.135093216756813	0.664	0.543	2.60038051361765e-62
RAB4A	1.52094116866277e-66	0.127824361989715	0.793	0.701	3.67611480465791e-62
AGPAT2	1.76017831941598e-66	0.137571242626144	0.773	0.682	4.25435099802842e-62
OCIAD1	1.78626800975198e-66	0.129126972096783	0.82	0.745	4.31740977957054e-62
FAM45A	2.27817128685976e-66	-0.134562229347191	0.544	0.628	5.50634000034003e-62
IL32	3.31998489773156e-66	0.181724093847697	0.935	0.898	8.02440349781718e-62
VDAC2	4.33729733376617e-66	0.10134779822247	0.992	0.987	1.04832476557128e-61
CNBP	5.48994126433589e-66	0.124267946179384	0.947	0.91	1.32691880358998e-61
PIM3	7.80607217465291e-66	-0.179235510037265	0.789	0.831	1.88672764461361e-61
NDUFA6	1.25122780601736e-65	-0.128804228575442	0.867	0.895	3.02421760714397e-61
SPG21	1.51301868537096e-65	-0.125810907082321	0.69	0.764	3.6569661625416e-61
CAMTA1	2.55986328699161e-65	0.127253967956354	0.971	0.958	6.18718956465872e-61
SLC25A39	2.92794959537437e-65	0.126475935541438	0.898	0.84	7.07685417201985e-61
DIXDC1	3.08907826670366e-65	-0.137532113557889	0.37	0.483	7.46630217062274e-61
RPGR	3.50834679170271e-65	-0.126343821889982	0.317	0.43	8.47967419554545e-61
SPSB1	5.5096463784099e-65	-0.135787314602532	0.389	0.497	1.33168152966167e-60
SSBP4	7.1204561661054e-65	-0.138784477327129	0.582	0.673	1.72101425534768e-60
OSBPL8	7.55316033332726e-65	-0.119553633442328	0.394	0.505	1.8255988525652e-60
ISG15	1.0481674408333e-64	0.242617832607932	0.997	0.995	2.53342070449409e-60
DDX50	1.53025980590819e-64	-0.117143881134403	0.384	0.498	3.6986379508801e-60
ARL2BP	1.62367572151362e-64	0.123319445210763	0.793	0.708	3.92442421889843e-60
COL18A1	2.02417923576755e-64	0.141456270960102	0.883	0.814	4.89244121285016e-60
CFDP1	2.31378102436956e-64	-0.129896963749449	0.823	0.858	5.59240873590122e-60
DEAF1	6.32804960468511e-64	-0.136963160028793	0.486	0.586	1.52948958945239e-59
GRSF1	7.03330340150652e-64	-0.128752789675217	0.488	0.59	1.69994943214412e-59
BGN	7.80944171000826e-64	0.199771224426042	0.948	0.937	1.887542061309e-59
SDCCAG8	8.88462538332993e-64	-0.122252203498546	0.471	0.576	2.14741395515084e-59
IFT20	1.06065107034712e-63	0.127780822075454	0.819	0.734	2.56359363702898e-59
IGFBP6	1.09548139399417e-63	-0.10232094179408	0.224	0.335	2.64777852928391e-59
VPS29	1.56604739937499e-63	0.130140280233931	0.911	0.866	3.78513656428936e-59
ATOH8	2.01618710749123e-63	0.134045777058135	0.559	0.432	4.8731242388063e-59
ARF1	2.61241941088473e-63	0.102334927979169	0.99	0.982	6.31421771610839e-59
CAPZB	2.73786745835527e-63	0.101980919977132	0.988	0.984	6.6174256468447e-59
SPAG9	2.92434579401199e-63	-0.11997852892261	0.381	0.495	7.06814378412699e-59
TMEM165	4.60500279964132e-63	-0.132970356230709	0.663	0.732	1.11302917667331e-58
EIF4EBP1	9.20055882211832e-63	0.148487107433456	0.98	0.967	2.223775067306e-58
SDCBP	1.06212443989442e-62	0.130924557070061	0.948	0.926	2.56715477122481e-58
VPS4B	1.14194829815653e-62	-0.112924071239415	0.312	0.422	2.76008903664433e-58
SMIM10L1	1.51438438761242e-62	0.121055947719019	0.655	0.545	3.66026706485922e-58
PALMD	1.56107031410995e-62	-0.153959696033795	0.545	0.634	3.77310694920374e-58
C19orf66	2.35850573721316e-62	0.133252418509672	0.615	0.5	5.70050836684421e-58
ENTPD1	9.22062128315049e-62	0.121310926119191	0.339	0.224	2.22862416413747e-57
VWF	9.24732290588652e-62	-0.195790035127404	0.957	0.958	2.23507794635277e-57
MYEF2	1.00408263682532e-61	-0.120418578615467	0.263	0.367	2.4268677332068e-57
MOSPD3	1.22778931683972e-61	0.119959258521158	0.563	0.447	2.96756677880161e-57
PDZD11	1.59706205698294e-61	0.119421756590766	0.721	0.624	3.86009899172776e-57
MRFAP1	1.82953647437769e-61	0.109745313832891	0.962	0.944	4.42198965857087e-57
MRPL11	4.59538708983509e-61	0.113654085391959	0.921	0.88	1.11070505961314e-56
KRT18	5.65916464815101e-61	0.136793393428675	0.964	0.948	1.3678200954581e-56
LIMD2	7.40281795098239e-61	0.123205194166581	0.62	0.501	1.78926109875244e-56
FERMT2	9.53579146393713e-61	-0.128916714709531	0.64	0.716	2.3048007968336e-56
MLEC	1.38054570389657e-60	-0.126545495625499	0.565	0.655	3.336778966318e-56
FAM213A	1.47835386668539e-60	-0.11573914767119	0.997	0.999	3.5731812957786e-56
HMGB3	1.95529360115866e-60	0.16326289032392	0.711	0.623	4.72594463400048e-56
TXNL4A	3.35364237207226e-60	0.123276733200691	0.954	0.921	8.10575361329866e-56
CEP170	3.64666078318794e-60	-0.126751770754948	0.423	0.522	8.81397911296525e-56
AK6	3.96706870069893e-60	0.119155744003014	0.615	0.51	9.58840504958931e-56
GIPC1	5.58777599088075e-60	0.121248675066031	0.741	0.657	1.35056545699588e-55
TMEM70	6.82529227239439e-60	0.136525432151446	0.699	0.608	1.64967314223772e-55
CXCL2	1.14717795592094e-59	0.140561030399427	0.167	0.082	2.77272911946091e-55
IDH2	1.17721199253352e-59	0.129475095625291	0.92	0.889	2.84532138595353e-55
FLOT1	1.24180901734113e-59	0.135638733341207	0.771	0.68	3.0014523949135e-55
UFC1	1.68584997051193e-59	0.110852918287699	0.961	0.937	4.07469937872734e-55
JAGN1	2.11822497456127e-59	0.117127419282412	0.783	0.705	5.11974976351459e-55
UQCRFS1	2.36418802604155e-59	0.103413971030931	0.961	0.944	5.71424245894242e-55
FN1	2.69692381013902e-59	-0.138909766970313	0.992	0.997	6.51846484910602e-55
MNAT1	3.03781926979734e-59	-0.12254531326284	0.471	0.568	7.34240917510017e-55
EIF3M	3.65306197590245e-59	0.111672248621803	0.953	0.933	8.82945079575622e-55
GTF3A	3.94221896075875e-59	0.123762499241895	0.916	0.872	9.5283432281539e-55
RRP15	4.16315293916009e-59	-0.101616911815385	0.226	0.329	1.00623406539499e-54
RRAS	4.29514042625428e-59	-0.128272938434517	0.907	0.935	1.03813544102566e-54
PLEKHJ1	6.38006283687094e-59	0.123544538183726	0.683	0.585	1.54206118767171e-54
CCDC174	8.72993166170265e-59	-0.109858284233266	0.321	0.429	2.11002448263353e-54
PUM3	2.33168645943263e-58	-0.115034781405882	0.36	0.466	5.63568617244866e-54
RHEB	2.78005563765089e-58	0.136367492089606	0.912	0.875	6.7193944762022e-54
MRPL13	4.65580787837422e-58	0.125298953620238	0.731	0.651	1.12530876420305e-53
PKN2	5.1922550790062e-58	-0.104292700182859	0.288	0.393	1.2549680525958e-53
APH1A	5.60998768299315e-58	0.116688988969846	0.86	0.807	1.35593402297944e-53
ASCC3	6.33222902734657e-58	-0.112751279286001	0.326	0.428	1.53049975590967e-53
NSA2	9.16298440923898e-58	-0.115748907262071	0.9	0.919	2.21469333171306e-53
FRG1	3.7841629797368e-57	-0.128755448011907	0.543	0.624	9.14632192202386e-53
SRP19	5.48701589290575e-57	0.11884284107786	0.801	0.726	1.32621174131532e-52
DHX36	7.14105885712247e-57	-0.129404112318877	0.584	0.664	1.7259939257665e-52
LAP3	8.54059090076592e-57	0.172629461115302	0.666	0.586	2.06426082071512e-52
HMG20B	9.52860231500736e-57	0.121512013954607	0.783	0.699	2.30306317953728e-52
PRRC2C	1.91444557014397e-56	-0.119022192009875	0.833	0.881	4.62721494303797e-52
TGFB1	2.04105345507129e-56	0.119736799314672	0.911	0.871	4.93322620090731e-52
ATP5C1	2.61448723242444e-56	0.100911196971154	0.977	0.967	6.31921564076987e-52
TIMM10	2.73812737391573e-56	-0.121092588315004	0.852	0.884	6.61805386275432e-52
C22orf39	3.25482996600737e-56	-0.114889663032914	0.569	0.659	7.86692402783982e-52
IMP3	4.12298839965898e-56	0.119537763309304	0.731	0.646	9.96526296197575e-52
CAPZA2	4.72044540857169e-56	0.11011424852547	0.967	0.949	1.14093165525178e-51
VMA21	8.77867154808131e-56	-0.11993706683722	0.633	0.702	2.12180491317125e-51
ACADVL	1.19648041728274e-55	0.115331753124725	0.843	0.79	2.89189316857238e-51
GNAS	1.20227575323953e-55	0.117335364816099	0.977	0.96	2.90590049557995e-51
SNF8	1.27212579359663e-55	0.103921745470285	0.967	0.952	3.07472804312305e-51
NQO1	1.45455317134422e-55	-0.134279327616635	0.652	0.739	3.51565501513898e-51
GLRX3	2.16000783763011e-55	0.111035775269673	0.911	0.865	5.22073894355198e-51
ECE1	3.65893311935941e-55	-0.122793587769381	0.937	0.95	8.84364134949168e-51
MYL6B	4.0312469455617e-55	0.11465344332876	0.985	0.969	9.74352386742263e-51
PWP1	4.37570501655621e-55	-0.118029730540964	0.696	0.768	1.05760790250164e-50
EEA1	6.96407302439627e-55	-0.112304601708634	0.341	0.443	1.68321644999658e-50
CTSZ	7.05267762579574e-55	-0.112916478078385	0.811	0.85	1.70463218215483e-50
PSMG2	8.91786567171181e-55	0.11232850609539	0.864	0.812	2.15544813285274e-50
H2AFJ	1.29923242289453e-54	-0.124242764063749	0.937	0.955	3.14024476613607e-50
VPS51	1.9992965309569e-54	0.120569516195027	0.733	0.643	4.83229971532282e-50
ZNF667-AS1	2.01800376197273e-54	0.103576378985712	0.519	0.401	4.87751509268809e-50
CCDC85B	2.76742823964178e-54	0.101388590698388	1	1	6.68887405521418e-50
CHD4	3.13226215069518e-54	-0.130309263092801	0.687	0.743	7.57067761823026e-50
UBE2F	3.35533079210081e-54	0.113336581606488	0.663	0.567	8.10983452450766e-50
TSPAN5	3.59951910503208e-54	-0.132649998844971	0.455	0.553	8.70003767686253e-50
IRF2BP2	4.60587088301463e-54	0.135589663274083	0.71	0.618	1.11323899242464e-49
EMC9	2.10044295670487e-53	0.117480888691062	0.51	0.405	5.07677062635568e-49
CD68	2.14946547049578e-53	-0.11068088029486	0.373	0.473	5.1952580421883e-49
CYP1A1	2.24020066323071e-53	-0.172390177803188	0.101	0.181	5.41456500302862e-49
PDE4B	2.84259766204402e-53	-0.118413127868285	0.379	0.477	6.87055854916041e-49
TMCO1	4.10181890321518e-53	-0.122135222572212	0.685	0.751	9.9140962890711e-49
TATDN1	4.77820639566643e-53	0.102622847859994	0.591	0.483	1.15489248583258e-48
DNAJC8	5.0359741361147e-53	-0.111120037061707	0.866	0.895	1.21719494869892e-48
KLHDC3	6.98036005986124e-53	0.111297411836712	0.696	0.599	1.68715302646846e-48
RBP1	7.0242911396717e-53	0.208301918928924	0.68	0.593	1.69777116845865e-48
NR2F6	7.57137774483022e-53	-0.117810126424864	0.391	0.486	1.83000200092546e-48
RGS19	7.58360732558339e-53	0.103368047144708	0.52	0.407	1.8329578905935e-48
GSTM3	8.39865134871202e-53	-0.125511098861324	0.787	0.84	2.0299540309837e-48
MIDN	1.06878974117908e-52	-0.134018095495556	0.818	0.852	2.58326480442984e-48
PSMA4	1.17672007056553e-52	0.135410897950658	0.925	0.905	2.84413241055688e-48
DGCR6L	1.95823198154074e-52	0.112420788927428	0.808	0.741	4.73304669938396e-48
SLC25A37	2.67237467572221e-52	-0.131606905120614	0.728	0.794	6.45912959122058e-48
FUS	3.5467303794927e-52	-0.120170267171036	0.887	0.91	8.57244732723386e-48
GLCE	4.05016418737038e-52	0.104765792309293	0.507	0.398	9.7892468408742e-48
ZNF428	5.24455562343508e-52	0.110539521948212	0.934	0.904	1.26760909418426e-47
ANXA5	7.00449298023488e-52	0.11897414386322	0.968	0.956	1.69298595332277e-47
DENR	8.78741092495117e-52	-0.11408745548981	0.608	0.681	2.1239172205607e-47
PCM1	1.1087227273184e-51	-0.116104058794949	0.433	0.527	2.67978283192856e-47
PSIP1	1.52688302306839e-51	-0.111444776348302	0.294	0.391	3.6904762667563e-47
BMP4	1.73983762003226e-51	0.137564219178501	0.284	0.186	4.20518752761797e-47
MAPK6	1.74386160949108e-51	-0.102365539168937	0.272	0.37	4.21491351013994e-47
AIMP1	2.20320548518706e-51	-0.117585931390786	0.73	0.789	5.32514765769712e-47
GABARAPL2	3.45980874361993e-51	0.100798150373067	0.945	0.914	8.36235773332937e-47
FZD4	4.26998784899948e-51	0.104049003886104	0.475	0.364	1.03205606310317e-46
GDI2	8.02633888624221e-51	0.106803142976471	0.944	0.92	1.93996610880474e-46
PAWR	3.11679305037354e-50	-0.114175270153134	0.433	0.529	7.53328880275284e-46
RAB11A	4.15125306501211e-50	0.103983272963584	0.978	0.966	1.00335786581343e-45
ADAMTS4	5.23781482973079e-50	-0.119955056855759	0.325	0.428	1.26597984434593e-45
SRSF1	7.83277729191129e-50	0.108279168867122	0.541	0.436	1.89318227145496e-45
DNAJB6	9.38723763094745e-50	0.102361676225735	0.874	0.816	2.2688953354e-45
AKAP12	9.41581222706359e-50	-0.202222817620896	0.832	0.875	2.27580181528127e-45
DEK	1.06251939183755e-49	-0.186491269245476	0.808	0.85	2.56810937007135e-45
IRF7	1.26692780995712e-49	0.110207625340451	0.493	0.381	3.06216451666636e-45
PTPN1	1.37409371436615e-49	-0.108688208711242	0.409	0.502	3.32118450762299e-45
KPNA2	1.47361026388701e-49	0.175939849076601	0.836	0.756	3.5617160078149e-45
TMEM248	1.57849973622849e-49	-0.100910048820535	0.402	0.505	3.81523386246425e-45
PSME1	1.85008683286402e-49	-0.112458344636789	0.92	0.953	4.47165987503233e-45
CTSL	1.98729043809439e-49	-0.132396255455365	0.592	0.676	4.80328098887413e-45
FAM177A1	2.84661715069911e-49	-0.112446805297742	0.716	0.77	6.88027365323975e-45
CLPP	2.88133050830829e-49	0.101318662792543	0.916	0.885	6.96417583858114e-45
PTTG1IP	3.79215209703291e-49	-0.113216385432564	0.894	0.911	9.16563161852855e-45
CIRBP	5.31183632747174e-49	0.102312490911078	0.98	0.97	1.28387084034992e-44
BLOC1S1	7.11485982036839e-49	-0.105527498657503	0.932	0.948	1.71966161858304e-44
SLBP	7.28796726140728e-49	-0.126996476285225	0.5	0.585	1.76150168708214e-44
BLCAP	1.11166156436054e-48	0.114576571142563	0.637	0.531	2.68688600105943e-44
C14orf119	1.40437660946494e-48	0.109156312779688	0.798	0.73	3.39437826507676e-44
VMP1	1.60843440729475e-48	0.119926862175751	0.722	0.638	3.8875859624314e-44
LINC00998	1.9558480243699e-48	0.107015772949144	0.762	0.685	4.72728467490204e-44
POLR1D	2.06634977603106e-48	0.101464684539928	0.979	0.968	4.99436740866706e-44
EIF4G2	2.48546608778958e-48	0.106071878064614	0.953	0.925	6.00737153418741e-44
SUGT1	2.90858155696657e-48	0.107882171878278	0.831	0.774	7.03004162318819e-44
PXMP2	4.40101866947941e-48	-0.11128216495703	0.405	0.497	1.06372621241317e-43
SNRPC	6.25522438406759e-48	0.116079520336982	0.894	0.85	1.51188773362914e-43
HHIP-AS1	7.60037248074802e-48	0.18714316000221	0.756	0.693	1.8370100285968e-43
CKAP4	1.04488267750307e-47	-0.116683520985226	0.812	0.843	2.52548143152491e-43
DDA1	2.77474895586919e-47	0.108620791370626	0.797	0.713	6.70656822633582e-43
SPOCK1	2.7896274904208e-47	-0.121554399607583	0.566	0.647	6.74252964434707e-43
RAB18	3.30904689282575e-47	0.100054168581242	0.69	0.596	7.99796633995983e-43
GPX8	3.69743321311851e-47	0.110149404658475	0.631	0.536	8.93669607610743e-43
THUMPD3-AS1	4.77655798355332e-47	0.118694684015161	0.775	0.698	1.15449406462484e-42
ARL5A	5.07279760393597e-47	0.104952079138486	0.806	0.736	1.22609518087132e-42
BMX	5.47533402937976e-47	-0.133853476036999	0.774	0.824	1.32338823490109e-42
MAP1LC3B	6.86840444756564e-47	0.105635088448455	0.929	0.902	1.66009335497662e-42
SLC43A3	9.84957260497225e-47	0.101182147091387	0.474	0.369	2.38064169862179e-42
CTSC	1.12073401488062e-46	-0.118352244592407	0.863	0.908	2.70881411396646e-42
FAM3C	2.34313262052419e-46	0.10081303799968	0.629	0.533	5.66335154380698e-42
ANAPC15	3.36355426954979e-46	0.113786294711745	0.746	0.667	8.12971066950184e-42
ZRANB2	3.59819746624865e-46	-0.114054435778228	0.546	0.619	8.69684327592298e-42
TSPAN18	3.80310387045148e-46	0.111021876489063	0.499	0.395	9.19210205488122e-42
MS4A6A	4.33564194312632e-46	-0.113645877030964	0.181	0.267	1.04792465765363e-41
NUDT3	4.4888696585946e-46	-0.10234759800449	0.634	0.705	1.08495979648231e-41
MACF1	4.72067908228606e-46	-0.121422195659327	0.797	0.833	1.14098813418854e-41
SUDS3	8.02516592825448e-46	-0.104683028072008	0.467	0.558	1.93968260485911e-41
OAS1	8.57000245199689e-46	0.129450220745152	0.452	0.352	2.07136959264765e-41
CACYBP	8.74002867764031e-46	0.132722004959894	0.831	0.766	2.11246493138566e-41
ELAVL1	9.73526059708168e-46	-0.101497217379001	0.503	0.591	2.35301248631464e-41
NEAT1	1.0148350663902e-45	-0.153395509101535	0.979	0.992	2.4528563554651e-41
CXCL1	1.32298267234676e-45	0.267866408198461	0.266	0.182	3.19764911906213e-41
IL6ST	1.56857233585916e-45	-0.119961639818675	0.669	0.734	3.79123933577159e-41
RBM25	1.74435241250109e-45	-0.118274587478519	0.755	0.797	4.21609978101514e-41
MRPS6	1.78512874116394e-45	0.107705049894744	0.754	0.677	4.31465616739324e-41
AQP1	2.23097837860669e-45	0.144565117350807	0.31	0.211	5.39227474109237e-41
PLXND1	2.23515034929425e-45	0.113527673351559	0.794	0.716	5.40235839424421e-41
TUBB	2.32285277873645e-45	0.122459757398794	1	0.999	5.61433516620599e-41
HHEX	2.3459471676645e-45	0.117158992868939	0.767	0.687	5.67015430424509e-41
GAMT	2.96929935101914e-45	0.117946937974753	0.815	0.746	7.17679653141327e-41
MPLKIP	4.15260119534987e-45	0.102861013453943	0.808	0.746	1.00368370891606e-40
MYADM	5.3255505713634e-45	-0.11738887995747	0.564	0.64	1.28718557309853e-40
PNPLA2	5.4769609897741e-45	0.113125735021127	0.657	0.569	1.3237814712284e-40
SLC7A11	6.25314620298416e-45	-0.122052766282599	0.343	0.435	1.51138543726127e-40
ITGAE	6.3626659090039e-45	0.10930921801541	0.674	0.586	1.53785635020624e-40
CDC20	6.50546590215419e-45	0.243053374972381	0.393	0.301	1.57237110855067e-40
DNAJA1	7.47446449833504e-45	0.117958547529668	0.85	0.802	1.80657806924758e-40
LUZP1	1.3751154448185e-44	-0.112013598609028	0.869	0.9	3.32365403012631e-40
RNPEP	1.64253631259147e-44	-0.105811285088997	0.526	0.599	3.97001026753359e-40
CDH5	3.74302541682459e-44	0.110315875531628	0.95	0.922	9.04689243246504e-40
PCNP	4.77336389220668e-44	0.101139873071744	0.83	0.765	1.15372205274635e-39
SLC38A2	7.37739301689319e-44	0.117904579168581	0.862	0.804	1.78311589218308e-39
SMIM12	7.40418469223269e-44	0.101135290507665	0.774	0.71	1.78959144011264e-39
DPYSL2	8.30146917579695e-44	-0.116230874652198	0.478	0.561	2.00646509979012e-39
CRACR2B	8.34046639823163e-44	0.101874339382182	0.515	0.407	2.01589072845258e-39
PNP	9.76602015764756e-44	-0.110660096452621	0.712	0.77	2.36044707210341e-39
EMC10	1.1583462568617e-43	0.102555638054931	0.757	0.694	2.79972290283473e-39
ANP32A	1.72444239682469e-43	0.119212065487449	0.815	0.77	4.16797727312529e-39
DAB2	2.29084137879821e-43	-0.123637616504131	0.811	0.843	5.53696361255526e-39
AKT1S1	2.53463199427006e-43	0.102123494683134	0.705	0.616	6.12620553015073e-39
RAB11B	3.02333782716782e-43	0.102255051996394	0.757	0.684	7.30740752826462e-39
EFNB2	3.06222620907463e-43	0.115082088105021	0.447	0.345	7.40140074733337e-39
TSTD1	3.11139655312324e-43	-0.154961595851005	0.645	0.7	7.52024546889887e-39
SELT	5.43145026310503e-43	0.108436337248467	0.814	0.748	1.31278152859249e-38
LINC00704	5.53289987288695e-43	0.12066154337135	0.631	0.551	1.33730189927678e-38
GATA3	9.72225091802368e-43	0.121945596700565	0.628	0.533	2.34986804688632e-38
PSMG4	9.8069633542502e-43	-0.109903648335288	0.75	0.794	2.37034304272227e-38
TIMM9	2.29851493601146e-42	0.108441506429434	0.792	0.735	5.55551060033969e-38
HOXA9	2.6739637937793e-42	0.106969044389674	0.631	0.534	6.46297048956456e-38
JUP	2.7982617034759e-42	0.109605695299538	0.708	0.625	6.76339853730124e-38
MRPL15	2.92144463094661e-42	0.10065094532792	0.904	0.868	7.06113167299797e-38
THRAP3	3.4521797283707e-42	-0.106233847796575	0.771	0.814	8.34391840347199e-38
DYNC1LI1	5.91443537732718e-42	-0.106733547788062	0.492	0.57	1.42951903069998e-37
ARMCX6	1.96367863336987e-41	0.100082680632031	0.739	0.661	4.74621125685497e-37
TARS	2.64208907641674e-41	-0.112603804397984	0.51	0.584	6.38592929769926e-37
PHLDA1	2.9831876724893e-41	0.114265181144341	0.597	0.512	7.21036460440663e-37
FUNDC2	4.94537502999622e-41	0.102704741601728	0.751	0.675	1.19529714475009e-36
PSAP	5.19215175292883e-41	-0.103147385135787	0.979	0.989	1.2549430786829e-36
TRIAP1	7.25020894409953e-41	0.10223111041841	0.798	0.735	1.75237550178886e-36
C11orf73	8.97201284246884e-41	0.100021146131019	0.848	0.8	2.16853550402472e-36
TSC22D4	1.0957832620054e-40	0.109797320916639	0.745	0.665	2.64850814426706e-36
NNMT	1.27615243296034e-40	-0.11916588838125	0.916	0.948	3.08446043046515e-36
NRN1	3.7675210408128e-40	0.111266574797836	0.568	0.479	9.10609835564454e-36
SKIL	6.88546737418574e-40	-0.113681824022725	0.623	0.69	1.66421746434069e-35
SNCA	1.1171006938883e-39	0.110766103893662	0.928	0.894	2.70003237712803e-35
ADI1	2.41273492566076e-39	0.10397181085201	0.802	0.738	5.83158031532205e-35
ERICH1	5.13675330431603e-39	-0.105081584939929	0.526	0.597	1.24155327365319e-34
C20orf27	7.42885545661437e-39	0.106016052368269	0.855	0.806	1.79555436386369e-34
EIF1B	8.7203879368438e-39	0.100848688681739	0.816	0.755	2.10771776433515e-34
PPP1CC	9.397625304029e-39	0.100854841356575	0.855	0.801	2.27140603598381e-34
CBX1	1.62784088097405e-38	-0.107545787835796	0.606	0.662	3.93449140931428e-34
KLF4	1.9410475173994e-38	-0.107223294076165	0.253	0.339	4.69151184955436e-34
NR2F2	1.99108108451987e-38	-0.111406582173653	0.904	0.923	4.81244298128452e-34
ABLIM1	2.147277007124e-38	0.112677119908251	0.478	0.39	5.18996852621871e-34
NUCB1	2.18768009983213e-38	0.101270657556079	0.839	0.803	5.28762280129427e-34
PTGES3	2.40602740189895e-38	0.109696291610757	0.955	0.931	5.81536823038975e-34
TINAGL1	6.12276824585495e-38	0.138218191137423	0.861	0.816	1.47987308502314e-33
NUDCD2	6.48945618234689e-38	0.120261328905093	0.707	0.642	1.56850155927324e-33
COPB1	8.52897874621407e-38	-0.101428102556326	0.553	0.624	2.06145416295994e-33
HNRNPA2B1	1.90007707583189e-37	0.127966088620949	0.977	0.967	4.59248629228567e-33
FAM198B	2.37931853752405e-37	0.103335525448643	0.582	0.489	5.75081290519564e-33
XRCC5	2.57229181655124e-37	-0.101545048844161	0.879	0.905	6.21722932060435e-33
PKIG	2.67821444604509e-37	0.104839746850562	0.964	0.943	6.47324431609099e-33
C19orf48	5.0502251801039e-37	0.107745331293405	0.795	0.738	1.22063942603111e-32
MSN	6.80327297944469e-37	-0.109884226674527	0.939	0.948	1.64435107913178e-32
LMNA	1.73878564251052e-36	0.12760598309112	0.989	0.987	4.20264489794792e-32
MYC	2.15900307148295e-36	0.114133141925526	0.715	0.645	5.21831042377429e-32
CCNB1	3.26366754540144e-36	0.228761722112405	0.438	0.354	7.88828445723528e-32
SOX18	3.6148638415423e-36	-0.165578637329514	0.702	0.726	8.73712590500773e-32
ALDH2	3.99805617236689e-36	0.103042329605891	0.729	0.664	9.66330176861077e-32
ATF4	4.25291575343159e-36	0.101409664189543	0.958	0.942	1.02792973760442e-31
NRP2	4.50835952074299e-36	-0.120724228426841	0.615	0.678	1.08967049616358e-31
KLF2	5.02133059209485e-36	-0.110364532279828	0.387	0.467	1.21365560410933e-31
LEPROT	1.04948650742927e-35	-0.100806767155939	0.759	0.8	2.53660888845655e-31
THBS1	1.1405629065107e-35	-0.124949759895219	0.979	0.983	2.75674054503637e-31
PLAC9	1.35416118019309e-35	-0.117613664048656	0.374	0.453	3.27300757252671e-31
CDKN3	1.46328788355574e-35	0.201638484196683	0.41	0.334	3.53676681455423e-31
ILF2	1.88245748393671e-35	0.103779740325782	0.932	0.907	4.54989973867504e-31
PFDN6	6.83082975183633e-35	-0.103148595635452	0.683	0.725	1.65101155101884e-30
SVIP	6.85810684514234e-35	-0.112534248910784	0.913	0.92	1.6576044244709e-30
TXNRD1	8.57395018794579e-35	-0.117018658211804	0.567	0.632	2.0723237604265e-30
TUBB6	1.27400429276675e-34	0.13090513596441	0.958	0.938	3.07926837561722e-30
PTPRE	5.00311079856946e-34	-0.11054452763523	0.586	0.645	1.20925188001424e-29
TUBA1A	9.54177758439643e-34	0.193629279275047	0.983	0.975	2.30624764214862e-29
DUT	1.60156168726971e-33	0.124840909175044	0.855	0.799	3.87097459813089e-29
ARGLU1	3.5149222289081e-33	-0.108884127939581	0.808	0.846	8.49556702727088e-29
STK17A	6.3591291247791e-33	-0.103624013363739	0.604	0.661	1.53700150945911e-28
HMGN2	1.19553502594774e-32	0.183152267890017	0.918	0.901	2.88960815771569e-28
CCL2	1.31970004344944e-32	0.242692480102306	0.608	0.512	3.1897150050173e-28
CTGF	1.39763448506767e-32	-0.232525542726026	0.926	0.931	3.37808255040855e-28
TXNRD2	1.523455313135e-32	0.109755696426605	0.563	0.484	3.6821914918473e-28
MIR4435-2HG	3.08650973648902e-31	0.107085712559555	0.857	0.808	7.46009403309396e-27
TMEM106C	5.62617296292203e-31	0.126043352784151	0.641	0.569	1.35984600513825e-26
ENO1	7.6945568189131e-31	0.111545336490021	0.999	0.998	1.8597743831313e-26
MGST1	8.52907294776249e-31	-0.110024547676622	0.728	0.775	2.06147693147419e-26
SELM	1.01903915971695e-30	-0.106686143266075	0.843	0.878	2.46301764903587e-26
RAMP2	1.77466639765558e-30	0.130378403187909	0.668	0.593	4.28936868313354e-26
PGF	8.46570394535315e-30	0.260205768807092	0.877	0.858	2.04616064359186e-25
VEPH1	1.31949794437843e-28	0.109561572684013	0.6	0.53	3.18922653156266e-24
HSPA5	5.06212937751483e-28	0.141916397484626	0.81	0.782	1.22351667054533e-23
GMFG	5.43725288912606e-28	-0.114877819548136	0.441	0.51	1.31418402330177e-23
UBE2L6	7.42931445051605e-28	0.11461477891953	0.703	0.655	1.79566530268973e-23
ITGB4	1.82030339866639e-27	-0.110254373778634	0.282	0.348	4.39967331457667e-23
RALA	9.69245854534595e-27	-0.113341275845426	0.979	0.988	2.34266723041012e-22
SPHK1	1.18992746265215e-26	0.114557168495581	0.801	0.767	2.87605467723024e-22
SOX7	3.31132215416646e-26	0.11004533507408	0.82	0.786	8.00346564662033e-22
TGM2	4.39338920134169e-26	0.102972238862882	0.942	0.93	1.06188216996429e-21
TNFRSF12A	4.33116884445548e-25	0.134659935714984	0.873	0.853	1.04684350970489e-20
CKS2	3.10985881943072e-24	0.150419848502361	0.783	0.706	7.51652876656404e-20
CMIP	2.17318714716178e-23	-0.100326691349757	0.706	0.74	5.25259333469001e-19
CYCS	3.81693610563259e-23	0.105831901242371	0.916	0.891	9.22553456731397e-19
MSMP	4.4049243306826e-22	-0.111291380266165	0.597	0.653	1.06467021072598e-17
DTYMK	3.1352699717683e-21	0.122506948053789	0.773	0.737	7.57794752176398e-17
CHST1	3.62637245696228e-21	0.127872363243244	0.296	0.236	8.76494222847784e-17
NASP	9.47472136214207e-21	-0.106398370387733	0.615	0.656	2.29004015322974e-16
MAGED2	2.17544309013529e-20	0.127503738616314	0.887	0.878	5.25804594885698e-16
SMC4	3.71555996867255e-20	0.12313321395065	0.543	0.477	8.98050844428155e-16
PTTG1	1.12480620143308e-18	0.200158187499335	0.656	0.616	2.71865658886376e-14
CCNB2	1.38165081746926e-17	0.116852254782523	0.355	0.298	3.33945002582319e-13
CENPA	2.19550102957271e-16	0.102176592466301	0.324	0.271	5.30652598847725e-12
PLTP	2.82920810427072e-16	0.102150155525365	0.539	0.488	6.83819598802232e-12
TUBA1B	1.12295262024478e-15	0.202719589463331	0.994	0.995	2.71417648313162e-11
PLK1	3.66965434900789e-15	0.127544856500093	0.334	0.287	8.86955456155206e-11
KIAA0101	7.38265647723862e-15	0.138721738940837	0.658	0.613	1.78438807054858e-10
NDUFA13	2.17649975145308e-14	-0.113800348005601	0.911	0.913	5.26059989926209e-10
ANKRD1	2.87177053090299e-14	-0.555632618318674	0.482	0.493	6.94106937319253e-10
CKS1B	1.76633005929695e-13	0.121625545170597	0.722	0.674	4.26921975332072e-09
STC1	1.53105953524323e-12	-0.1041760002584	0.072	0.102	3.70057089668289e-08
HMGB2	6.49275831016357e-11	0.134758732044892	0.682	0.634	1.56929968356653e-06
LXN	2.42788564742793e-08	0.105352257257259	0.861	0.843	0.000586819960983332
TOP2A	1.30440019735071e-06	-0.1941916797571	0.317	0.332	0.0315273527699666
CD9	1.81214752964906e-06	-0.140856466315808	0.983	0.982	0.0437996057916179
CXCR4	2.17291308399534e-06	0.14174017986268	0.256	0.226	0.0525193092401673
CLU	0.000162611466964031	0.176806974565978	0.907	0.918	1
TUBB4B	0.00233425658678467	0.107354826243037	0.939	0.947	1
CENPF	0.0679055833733124	-0.126079973333182	0.336	0.329	1
