# Supplementary material for: Transcriptional drifts associated with environmental changes in endothelial cells
Source: eLife. 2023 Mar 27;12:e81370. doi: 10.7554/eLife.81370 (PMC10168696; doi:10.7554/eLife.81370)
Supplement: Supplementary file 7. [file elife-81370-supp7.csv]

	p_val	avg_logFC	pct.1	pct.2	p_val_adj
LGALS1	0	3.10125214620051	1	0.817	0
FABP5	0	3.01322169480952	0.997	0.132	0
HMGA1	0	2.94144132185661	1	0.399	0
MMP1	0	2.46413947262968	0.967	0.004	0
MT2A	0	2.45083765733383	0.992	0.696	0
PGF	0	2.15299655182264	0.877	0.005	0
TFPI2	0	2.14851874916022	0.9	0.018	0
GPX1	0	1.94975648366224	1	0.909	0
GNG11	0	1.81320507163325	1	0.961	0
ISG15	0	1.71907622976222	0.997	0.753	0
UCHL1	0	1.68698812514792	0.936	0.033	0
PTTG1	0	1.45272372850421	0.656	0.046	0
KIAA0101	0	1.4302166850414	0.658	0.021	0
RALA	0	1.4241312744253	0.979	0.469	0
FABP4	0	1.40360725806291	0.573	0.001	0
HN1	0	1.39547099790691	0.984	0.614	0
CKS2	0	1.35856056261355	0.783	0.2	0
MAP1B	0	1.35708985308163	0.908	0.089	0
EIF4EBP1	0	1.34774994668844	0.98	0.502	0
THBS1	0	1.33834631270118	0.979	0.508	0
UBE2S	0	1.33052621633678	0.819	0.281	0
ENO1	0	1.32424600723082	0.999	0.882	0
GDF15	0	1.28710796022843	0.753	0.004	0
TUBA1C	0	1.26394811418223	0.921	0.443	0
AP2S1	0	1.25556538396179	1	0.925	0
NME4	0	1.2502962891827	0.992	0.599	0
GPX4	0	1.24977688155906	1	0.939	0
PHLDA2	0	1.2459931612845	0.869	0.012	0
TUBA1B	0	1.24052141418718	0.994	0.974	0
PRSS23	0	1.23293710688914	0.942	0.418	0
BAX	0	1.22816065205917	0.995	0.626	0
ANXA2	0	1.22170773917657	1	0.995	0
TUBB4B	0	1.20006833168807	0.939	0.624	0
H2AFZ	0	1.1864177658167	0.996	0.949	0
S100A16	0	1.18461267346122	1	0.976	0
CLDN5	0	1.16957612400903	0.976	0.732	0
PFN1	0	1.15643532948428	1	1	0
CTSC	0	1.14397312805886	0.863	0.115	0
TUBA1A	0	1.11305777391508	0.983	0.849	0
CLEC14A	0	1.09075775741112	0.993	0.862	0
ATP1B3	0	1.06540849848403	0.961	0.534	0
RAN	0	1.06508520364995	0.999	0.928	0
SNRPB	0	1.05638735097992	0.991	0.754	0
C17orf89	0	1.05074864450273	0.969	0.507	0
PHPT1	0	1.04730886337316	0.996	0.773	0
NUTF2	0	1.0381971766902	0.984	0.519	0
HEY1	0	1.00614259996077	0.643	0	0
PKM	0	1.00572656416473	0.995	0.844	0
AKAP12	0	1.00511321771872	0.832	0.361	0
HHIP	0	1.00271274327129	0.702	0.145	0
IDH2	0	0.999595439734862	0.92	0.263	0
PRELID1	0	0.999473873083475	0.998	0.863	0
PGAM1	0	0.997423818619153	0.995	0.813	0
MZT2A	0	0.971327674626833	0.993	0.737	0
SAT1	0	0.969138207306445	0.991	0.867	0
TYMS	0	0.956687677226974	0.62	0.014	0
TNFRSF12A	0	0.956145100513143	0.873	0.35	0
RAC3	0	0.935422296586037	0.831	0.021	0
SPHK1	0	0.93169282589085	0.801	0.119	0
TPI1	0	0.922533701225177	1	0.985	0
FOSL1	0	0.920582872239896	0.779	0.025	0
CFL1	0	0.917082541680126	1	0.999	0
SLC25A6	0	0.908212853711788	1	0.998	0
NME1	0	0.888039252439641	0.948	0.626	0
SH3BGRL3	0	0.887221024263083	1	0.997	0
VAMP5	0	0.886897539222713	0.999	0.941	0
PXDN	0	0.860423791432428	0.787	0.051	0
MYL6B	0	0.860262722822927	0.985	0.646	0
TPGS2	0	0.854546329278419	0.956	0.462	0
CCL14	0	0.853886071267329	0.625	0.037	0
SRPX	0	0.852064340905848	0.9	0.386	0
IFI27	0	0.846707780427616	1	1	0
MRPL15	0	0.844037784047905	0.904	0.35	0
NQO1	0	0.843189050254102	0.652	0.063	0
PKIG	0	0.840543106227924	0.964	0.584	0
ALDOA	0	0.834934367302088	1	0.992	0
MRPL22	0	0.832981147843192	0.941	0.567	0
CYBA	0	0.832584011865271	0.969	0.67	0
ABRACL	0	0.828302010319495	0.926	0.378	0
GAPDH	0	0.826775307364039	1	1	0
GSTO1	0	0.817047360764025	0.994	0.888	0
CDKN1A	0	0.814221080209999	0.857	0.379	0
EIF5A	0	0.811397768485487	0.994	0.868	0
IL32	0	0.808150388451602	0.935	0.655	0
CAV1	0	0.80146940658807	1	0.979	0
BNIP3	0	0.799173967626163	0.964	0.61	0
SVIP	0	0.795642440379668	0.913	0.52	0
FAAP20	0	0.791559872596195	0.975	0.632	0
LMNA	0	0.790979661052272	0.989	0.88	0
DTYMK	0	0.789964716739501	0.773	0.315	0
GSTP1	0	0.789616773793909	1	0.994	0
SEC14L1	0	0.789274895551922	0.905	0.367	0
MGST1	0	0.786571773439024	0.728	0.1	0
TSPO	0	0.782560920311536	1	0.994	0
S100A13	0	0.776780379910506	0.999	0.936	0
MRPL12	0	0.775995282944207	0.95	0.516	0
PLAUR	0	0.775477104696862	0.682	0.085	0
CTSB	0	0.771537876886451	0.966	0.613	0
MRPL41	0	0.766155046240803	0.984	0.725	0
MYDGF	0	0.762943720434765	0.991	0.811	0
PLP2	0	0.761598549654304	0.948	0.64	0
ADRM1	0	0.760260666534355	0.974	0.674	0
SNCA	0	0.758494645283924	0.928	0.463	0
UBTD1	0	0.755565273736356	0.836	0.235	0
SMS	0	0.753647038557912	0.883	0.345	0
RHOC	0	0.749275825986953	1	0.977	0
ACTB	0	0.743504132057029	1	1	0
TUBB	0	0.741014173817725	1	0.994	0
PPP4C	0	0.740037088360576	0.972	0.664	0
PGLS	0	0.739472753981894	0.98	0.757	0
RAB32	0	0.738230691016742	0.913	0.442	0
AP1S1	0	0.737433849148201	0.928	0.468	0
RANBP1	0	0.736913053276597	0.974	0.839	0
CLIC1	0	0.736831474713536	1	0.961	0
COX5A	0	0.735988832228504	0.999	0.936	0
TPM2	0	0.732844078835134	0.999	0.933	0
PRDX1	0	0.729906036985998	0.995	0.943	0
ATP5B	0	0.72896202419319	0.989	0.831	0
ATP5G3	0	0.722857971318863	0.991	0.886	0
DYNLT1	0	0.722086254222522	0.989	0.791	0
CMTM7	0	0.711900998374898	0.769	0.109	0
UPP1	0	0.706038495100832	0.782	0.159	0
SLC25A5	0	0.70547552858612	0.998	0.936	0
AURKAIP1	0	0.704608068873238	0.992	0.845	0
CSTB	0	0.698556646159768	0.998	0.934	0
ARL6IP4	0	0.697943018362918	0.999	0.969	0
SGK1	0	0.693550890514498	0.802	0.226	0
SSR3	0	0.693449206884243	0.984	0.759	0
MLLT11	0	0.69307179657876	0.709	0.103	0
ICAM2	0	0.69168843988973	0.993	0.9	0
FDPS	0	0.690906392117076	0.955	0.708	0
PDLIM1	0	0.689444381202007	0.978	0.782	0
FTL	0	0.688006514949502	1	1	0
UBE2L3	0	0.686803592569817	0.988	0.793	0
EIF1AY	0	0.684243131942355	0.679	0	0
AKR1B1	0	0.684096536314764	0.815	0.279	0
TIMM13	0	0.680229441173392	0.997	0.873	0
TKT	0	0.679990085357784	0.964	0.709	0
PSMA7	0	0.678065880570505	1	0.985	0
LSM7	0	0.676302004790671	0.985	0.767	0
APRT	0	0.675141318275041	0.998	0.918	0
CHCHD2	0	0.672896778071205	1	0.994	0
ZFAS1	0	0.672530424549594	0.999	0.969	0
ANAPC11	0	0.670638844112027	0.997	0.892	0
DEF8	0	0.66865078108608	0.854	0.321	0
SEC61B	0	0.665848113537597	0.999	0.955	0
PRDX5	0	0.66522328855872	0.998	0.917	0
ZMAT3	0	0.665195170828026	0.714	0.107	0
LSM4	0	0.663965764492967	0.95	0.643	0
CD93	0	0.660980063995796	0.894	0.458	0
MPG	0	0.659814126202465	0.972	0.696	0
TUBB6	0	0.658806064537836	0.958	0.78	0
PDLIM2	0	0.658649030285076	0.946	0.588	0
C19orf48	0	0.657121145766853	0.795	0.246	0
SCAND1	0	0.657086337193934	0.99	0.778	0
NHP2	0	0.654592824672766	0.991	0.873	0
CISD1	0	0.654267478849957	0.887	0.487	0
MAP4K4	0	0.65283858005348	0.859	0.383	0
PDCD5	0	0.65248319487897	0.977	0.817	0
GADD45GIP1	0	0.651601611017737	0.997	0.909	0
DBI	0	0.648362502686538	0.986	0.799	0
LINC00704	0	0.647908921622658	0.631	0	0
APOA1BP	0	0.646641020421882	0.955	0.706	0
ARPC2	0	0.643808166306912	1	0.982	0
FSCN1	0	0.643324637527883	0.978	0.717	0
MSMP	0	0.641453208889906	0.597	0.033	0
ATP5G1	0	0.640376571295665	0.972	0.783	0
CYCS	0	0.638806462528165	0.916	0.626	0
CCDC167	0	0.638718694538584	0.802	0.279	0
LINC01013	0	0.638321036888436	0.618	0.004	0
CYC1	0	0.635353718189569	0.961	0.694	0
OAZ1	0	0.635235224778133	1	0.999	0
GAMT	0	0.633609940312176	0.815	0.295	0
HMGB3	0	0.633552536456645	0.711	0.194	0
CARD19	0	0.631794483402055	0.915	0.482	0
CCDC85B	0	0.630760113410573	1	0.99	0
MRPL17	0	0.627281128719701	0.928	0.56	0
COL4A2	0	0.626973907516558	0.669	0.061	0
LDHB	0	0.625581591536784	0.999	0.97	0
ARPC3	0	0.624038045135837	0.999	0.952	0
VEPH1	0	0.623403042270932	0.6	0.003	0
DRAP1	0	0.622041488219704	0.981	0.744	0
NDUFS8	0	0.620849844340549	0.986	0.804	0
SNF8	0	0.620132121032468	0.967	0.674	0
UQCC2	0	0.617787076173395	0.882	0.472	0
STOML2	0	0.617114193682935	0.971	0.716	0
PSMB2	0	0.614404737588442	0.95	0.69	0
ZNF706	0	0.611281358367489	0.987	0.81	0
LRRC59	0	0.608077812834719	0.833	0.35	0
MBOAT7	0	0.606058539011533	0.819	0.27	0
MRPL52	0	0.605469223352012	0.949	0.669	0
COPE	0	0.602817208779631	0.991	0.856	0
MTCH2	0	0.600336236989328	0.876	0.443	0
PRDX4	0	0.599984593729896	0.942	0.742	0
TMSB10	0	0.599140092064709	1	1	0
MYL12A	0	0.598983695368727	1	0.999	0
HSBP1	0	0.595143587619986	0.994	0.869	0
UBE2I	0	0.593812994454124	0.976	0.74	0
TXN	0	0.593052768691032	0.999	0.977	0
MMP14	0	0.59224017838915	0.672	0.131	0
C20orf27	0	0.591846803292822	0.855	0.386	0
FUOM	0	0.590196772814474	0.707	0.097	0
MRPL28	0	0.589516497675993	0.924	0.527	0
SMTN	0	0.589060291111873	0.642	0.075	0
ARPC1A	0	0.588810894723177	0.987	0.822	0
GADD45A	0	0.586937223261997	0.767	0.259	0
NPM3	0	0.585595900865257	0.909	0.527	0
KDELR2	0	0.584312784785703	0.991	0.845	0
SPOCD1	0	0.582568903348462	0.517	0.001	0
MIF	0	0.581810468030017	0.993	0.917	0
PSMD8	0	0.581551357863102	0.964	0.743	0
SNAI1	0	0.580719897920587	0.574	0.009	0
SNRPD1	0	0.579673029049133	0.983	0.845	0
NDUFV2	0	0.578623923744982	0.978	0.783	0
SEPW1	0	0.574933966586938	0.997	0.944	0
NTAN1	0	0.57098587372659	0.955	0.663	0
S100A6	0	0.566589009647595	1	1	0
BID	0	0.56576402966207	0.747	0.198	0
POLR2E	0	0.5631962237161	0.956	0.676	0
FTH1	0	0.560478477030711	1	1	0
SEC61G	0	0.559618031455131	0.997	0.917	0
TRAPPC1	0	0.559181952224169	0.987	0.835	0
ARHGDIB	0	0.558899639646237	0.993	0.941	0
RNF7	0	0.55883780182277	0.991	0.866	0
DNPH1	0	0.557960334118659	0.84	0.385	0
SEC13	0	0.555164085795261	0.893	0.54	0
NT5C	0	0.552152740990128	0.668	0.108	0
BSG	0	0.550676134800008	0.994	0.91	0
ERH	0	0.549646230464983	0.99	0.876	0
ARPC4	0	0.549530729302525	0.943	0.603	0
MDH2	0	0.549135792263892	0.97	0.77	0
POMP	0	0.546240949494055	0.996	0.929	0
POLR2J	0	0.545963091161377	0.976	0.747	0
RER1	0	0.543783195395693	0.92	0.555	0
C4orf32	0	0.541912911828705	0.784	0.31	0
TXNDC17	0	0.540846080518019	0.97	0.78	0
COL4A1	0	0.537656431994793	0.601	0.051	0
PPP2R1A	0	0.535823096892442	0.908	0.537	0
TRIP6	0	0.532362168946294	0.753	0.23	0
TMEM141	0	0.53015825940078	0.919	0.571	0
PPA1	0	0.529655635301938	0.972	0.793	0
PPP1CA	0	0.526791399089298	0.961	0.744	0
PSMB7	0	0.521358748253383	0.992	0.894	0
CD99	0	0.516265992112815	1	0.992	0
MRPL37	0	0.515596900072573	0.888	0.508	0
PPIA	0	0.514760125617521	1	1	0
APLP2	0	0.511937484645855	0.981	0.876	0
DESI1	0	0.511463832776662	0.759	0.266	0
YWHAQ	0	0.510440338471635	0.97	0.786	0
UQCRH	0	0.50729895554483	1	0.992	0
FAM207A	0	0.507196852629355	0.805	0.339	0
PHB	0	0.505942795581327	0.959	0.743	0
HINT1	0	0.50407148250484	1	0.998	0
MYL6	0	0.504028022726573	1	1	0
CALM3	0	0.503413226403415	0.977	0.798	0
TALDO1	0	0.501488812043656	0.964	0.786	0
SLC25A3	0	0.499861392015762	0.999	0.985	0
NDUFS7	0	0.499090295928229	0.955	0.693	0
PSMB6	0	0.495727168997773	0.983	0.871	0
PSMB5	0	0.491687565472557	0.996	0.939	0
MRPL23	0	0.490687973515021	0.769	0.273	0
PRDX2	0	0.490462549813302	0.995	0.939	0
FRMD4A	0	0.487068225177163	0.589	0.075	0
EEF1B2	0	0.485580200742729	1	0.999	0
C19orf53	0	0.484310417684795	0.999	0.956	0
MARCH3	0	0.483248053965919	0.543	0.023	0
DDT	0	0.479794295127936	0.984	0.827	0
NME2	0	0.476496937338897	0.663	0.154	0
NDUFAB1	0	0.473549611486241	0.98	0.834	0
SUB1	0	0.472841088653799	0.998	0.939	0
P4HB	0	0.471666422495303	0.992	0.904	0
NGFRAP1	0	0.470320998452259	0.999	0.977	0
MZT2B	0	0.465315809306675	1	0.988	0
SUMO2	0	0.464281194754594	1	0.989	0
NEDD8	0	0.462695709664251	0.999	0.976	0
COX8A	0	0.46039751711263	0.996	0.938	0
NDUFS6	0	0.447623085218319	0.989	0.899	0
HMGN1	0	0.445034891261443	0.996	0.955	0
NDUFS5	0	0.438975577247695	0.999	0.987	0
ATP5G2	0	0.421863982109008	1	0.999	0
UBA52	0	0.414802593686273	1	1	0
ACTG1	0	0.400595827251152	1	1	0
SERF2	0	0.356284031248856	1	1	0
GNB2L1	0	0.339227273012626	1	1	0
TPT1	0	0.314458795915339	1	1	0
BTF3	0	0.299680302795651	1	1	0
CD3D	0	-0.141953981837674	0	0.136	0
SLC8A1	0	-0.155124144607837	0.001	0.15	0
AIF1	0	-0.159277850210784	0.002	0.155	0
CBFA2T3	0	-0.167523555807114	0.001	0.168	0
FGR	0	-0.167649266052834	0.001	0.163	0
CD7	0	-0.168335882682597	0	0.167	0
ADGRA1	0	-0.169809367065179	0	0.165	0
FAM20A	0	-0.17013630565468	0	0.158	0
S100B	0	-0.18257508757731	0.003	0.173	0
KRT1	0	-0.183882670024305	0	0.176	0
TSHZ2	0	-0.18467231843187	0.001	0.158	0
FMOD	0	-0.188429517998824	0.006	0.175	0
RP11-262H14.3	0	-0.191418070593221	0.001	0.186	0
CTU1	0	-0.19230875513064	0.01	0.203	0
CD37	0	-0.193973877442335	0.001	0.191	0
TRBC1	0	-0.195579970574532	0	0.188	0
NOSTRIN	0	-0.198798546679033	0.003	0.162	0
PKNOX2	0	-0.200757378509097	0.012	0.199	0
LYPD2	0	-0.200998422761322	0	0.145	0
ZNF365	0	-0.204905694954304	0.001	0.189	0
ATP2A3	0	-0.21165222665427	0.003	0.2	0
ITLN2	0	-0.21228993918449	0.005	0.196	0
RP11-286H15.1	0	-0.21910895351388	0.002	0.208	0
RP11-983P16.4	0	-0.221261881824333	0.016	0.226	0
FAM65B	0	-0.235968943999627	0.008	0.218	0
MIAT	0	-0.236043489681787	0.003	0.216	0
NKG7	0	-0.23876139905717	0	0.225	0
PTK2B	0	-0.23984192143134	0.012	0.236	0
LYZ	0	-0.239940885026101	0.001	0.231	0
IL17RD	0	-0.245561085429659	0.02	0.238	0
C21orf33	0	-0.249057407196309	0.011	0.239	0
ANGPTL1	0	-0.252290178930739	0.005	0.229	0
KCNK15	0	-0.252506073137914	0	0.227	0
CBX7	0	-0.256755649114302	0.033	0.274	0
PTPN13	0	-0.258152533101423	0.021	0.243	0
TYROBP	0	-0.261425918831854	0	0.25	0
CLEC3B	0	-0.266031346973182	0.006	0.255	0
SGCD	0	-0.274509658482124	0.014	0.264	0
AFAP1L2	0	-0.28559670414495	0.022	0.285	0
RHOU	0	-0.290130177938457	0.031	0.285	0
SYT15	0	-0.290554497921046	0.017	0.29	0
IGKC	0	-0.292006223257695	0	0.277	0
RNF125	0	-0.296537392767601	0.028	0.276	0
BEX2	0	-0.29992730896809	0.042	0.298	0
CD14	0	-0.299969815262789	0.004	0.252	0
MAATS1	0	-0.30187484260719	0.002	0.249	0
MPP7	0	-0.304740935317383	0.034	0.312	0
NOS1	0	-0.304761021528674	0.01	0.272	0
BMPER	0	-0.308491399821093	0.016	0.288	0
S1PR4	0	-0.311719980269769	0.024	0.304	0
DOC2B	0	-0.321313270589587	0.008	0.307	0
LTB	0	-0.323669927015178	0.044	0.346	0
GNLY	0	-0.324235849614978	0	0.306	0
TNXB	0	-0.324809589409961	0.003	0.3	0
COL9A3	0	-0.325153768721662	0.02	0.269	0
FAM134B	0	-0.326574029517361	0.007	0.286	0
LINC01133	0	-0.331096759879234	0.001	0.278	0
RP11-255M2.3	0	-0.333271980516939	0.02	0.334	0
RNU12	0	-0.333681950621936	0.003	0.264	0
CCDC3	0	-0.333848415330161	0.019	0.295	0
PDZK1IP1	0	-0.338167260427095	0.02	0.321	0
ITPR1	0	-0.340340697897356	0.053	0.339	0
HIST2H2AC	0	-0.348142880029816	0.06	0.359	0
KCNN4	0	-0.349402658985845	0.023	0.319	0
NDRG2	0	-0.350084763029241	0.035	0.337	0
KCNJ2	0	-0.357814627360456	0.045	0.323	0
PTMA	0	-0.35839628410942	1	1	0
PRR15	0	-0.36077015289226	0.009	0.329	0
PSMD5-AS1	0	-0.361101359109462	0.058	0.374	0
PLA1A	0	-0.362335166452459	0.019	0.321	0
GFRA1	0	-0.367046111311092	0.001	0.297	0
DLL1	0	-0.368582354332678	0.049	0.361	0
AC131056.5	0	-0.377655676006129	0	0.352	0
CEP112	0	-0.379045499183287	0.072	0.385	0
AC104389.1	0	-0.380871459108904	0	0.35	0
RASL11B	0	-0.388886813039371	0.015	0.337	0
DOK5	0	-0.389220300156162	0.097	0.426	0
HES4	0	-0.40079274461117	0.054	0.383	0
GLT8D2	0	-0.401246381974837	0.039	0.376	0
PLXNA4	0	-0.403565588756059	0.093	0.408	0
CD79B	0	-0.415824128973268	0.035	0.394	0
MYL12B	0	-0.421233560737534	0.999	0.999	0
TMOD1	0	-0.422027594153254	0.044	0.403	0
KLHL13	0	-0.423283685834493	0.095	0.439	0
CCNI	0	-0.425672735425503	0.995	0.997	0
RAB6B	0	-0.428138883089518	0.11	0.449	0
S100A4	0	-0.428379232698426	0.049	0.407	0
ITM2A	0	-0.431364279192253	0.038	0.389	0
RASSF9	0	-0.434900871442597	0.022	0.399	0
ARMC10	0	-0.435209763317474	0.136	0.486	0
NFKBIZ	0	-0.439886404621249	0.085	0.426	0
C19orf33	0	-0.440638402605769	0.042	0.388	0
TPGS1	0	-0.442181438025883	0.036	0.425	0
ITLN1	0	-0.443613463815234	0.009	0.307	0
HIF3A	0	-0.444236260719676	0.133	0.482	0
CREG1	0	-0.445415906262694	0.102	0.465	0
LHX6	0	-0.447190382768525	0.01	0.395	0
MKL2	0	-0.449979467134869	0.133	0.476	0
IRAK3	0	-0.452065216291302	0.11	0.469	0
RELL1	0	-0.459339471850538	0.079	0.445	0
H3F3B	0	-0.460102543023853	0.999	1	0
S100A8	0	-0.462675701199952	0	0.424	0
PLLP	0	-0.462713505899911	0.089	0.456	0
PGM5-AS1.1	0	-0.469463576804821	0.002	0.331	0
CDA	0	-0.472397973490158	0.179	0.533	0
PDCD7	0	-0.474820511603927	0.148	0.514	0
ART4	0	-0.47771527371877	0.132	0.468	0
EPB41L4A	0	-0.479439770555284	0.157	0.519	0
COMMD6	0	-0.481282313992739	0.997	0.999	0
KCNT2	0	-0.489260763009603	0.005	0.419	0
HIST1H1D	0	-0.490372288887727	0.035	0.39	0
ITM2B	0	-0.491331676290891	0.982	0.998	0
PTPRG	0	-0.495593706424806	0.11	0.489	0
HLA-DRA	0	-0.497692681536082	0	0.443	0
PCDH7	0	-0.502046458143617	0.107	0.495	0
CD52	0	-0.505422470191912	0	0.452	0
PLCB4	0	-0.505504832944807	0.024	0.458	0
PURA	0	-0.509439319360781	0.207	0.559	0
ST6GALNAC1	0	-0.51275024867847	0.027	0.456	0
C1S	0	-0.514605428752689	0.007	0.435	0
LYST	0	-0.514716706700901	0.116	0.505	0
OTC	0	-0.515345851410542	0.016	0.415	0
TGFB2	0	-0.517956210473544	0.003	0.447	0
TNS2	0	-0.518805676106829	0.186	0.565	0
C2orf40	0	-0.523068356166065	0.004	0.427	0
RNF187	0	-0.526158222777876	0.252	0.619	0
SELM	0	-0.526267225863207	0.843	0.942	0
IQCA1	0	-0.528774379613251	0.085	0.507	0
CDKN1C	0	-0.531053579234854	0.126	0.528	0
ARL4D	0	-0.5339528468567	0.104	0.485	0
TOMM7	0	-0.538733829372432	0.998	1	0
YBX1	0	-0.541898654013511	0.999	0.999	0
EIF4A2	0	-0.543556238143513	0.97	0.987	0
NACA2	0	-0.544890341275553	0.068	0.512	0
CPNE5	0	-0.544966487123474	0.123	0.55	0
CRIP2	0	-0.545507853573219	0.999	0.999	0
CSF2RB	0	-0.546100460138306	0.145	0.546	0
PINK1	0	-0.547281368450766	0.212	0.604	0
PROCR	0	-0.548056360703733	0.971	0.991	0
SEPT7	0	-0.548267013726931	0.866	0.948	0
CYBRD1	0	-0.548733592061303	0.227	0.597	0
FAM107A	0	-0.552512748389127	0.037	0.475	0
ZNF90	0	-0.55412069980688	0.254	0.61	0
CKB	0	-0.556051757343697	0.13	0.506	0
NPR1	0	-0.557270271616132	0.256	0.621	0
COL6A2	0	-0.561261059881597	0.177	0.566	0
AHSP	0	-0.561458365585907	0	0.44	0
CDH23	0	-0.561904510848496	0.002	0.481	0
MEOX2	0	-0.56250447141743	0.049	0.494	0
TSPAN2	0	-0.563532746154745	0.062	0.498	0
MDFIC	0	-0.56861192264821	0.069	0.526	0
RHOB	0	-0.573720408901697	0.956	0.99	0
ADGRA2	0	-0.573909935153991	0.225	0.626	0
CFI	0	-0.575092123680065	0.2	0.57	0
FAM167B	0	-0.575364775095205	0.083	0.524	0
CMKLR1	0	-0.578136575801673	0.004	0.486	0
NR2F2	0	-0.581571844345171	0.904	0.95	0
CANX	0	-0.581622055761643	0.867	0.932	0
RSRP1	0	-0.582971533490146	0.299	0.654	0
HMCN1	0	-0.583151025096353	0.042	0.523	0
MEF2A	0	-0.586646213987135	0.313	0.645	0
BMP6	0	-0.59036749335316	0.253	0.622	0
CH17-189H20.1	0	-0.591804658244872	0.184	0.604	0
MFGE8	0	-0.594297305427679	0.302	0.657	0
NET1	0	-0.594432483176347	0.209	0.613	0
SFRP5	0	-0.595481472204128	0	0.437	0
MPHOSPH8	0	-0.596434719170945	0.592	0.814	0
CARD16	0	-0.59822152105109	0.51	0.782	0
CEBPB	0	-0.601477115205572	0.046	0.528	0
ADI1	0	-0.602041352861901	0.802	0.901	0
SULT1E1	0	-0.603058146769635	0.062	0.415	0
HERC2	0	-0.604609286783058	0.299	0.634	0
TRIOBP	0	-0.605906807948515	0.695	0.865	0
FXYD6	0	-0.606869152900723	0.61	0.875	0
UBR3	0	-0.607133980193059	0.121	0.552	0
SPTBN1	0	-0.610423263334336	0.811	0.924	0
ACKR3	0	-0.611534336442251	0.036	0.511	0
KMT2E	0	-0.617120387725848	0.576	0.799	0
HLA-C	0	-0.619642140243364	0.931	0.984	0
CIRBP	0	-0.619762437590349	0.98	0.998	0
MMRN2	0	-0.619993513596595	0.635	0.831	0
CFH	0	-0.620426667637547	0.3	0.651	0
RAPGEF5	0	-0.622791556825997	0.187	0.612	0
INMT	0	-0.626262977430682	0	0.432	0
TTC19	0	-0.628603663830637	0.26	0.659	0
TPR	0	-0.6328739120299	0.705	0.875	0
TMBIM4	0	-0.63540463989994	0.682	0.877	0
GLRX5	0	-0.637022403258942	0.207	0.647	0
ANKRD50	0	-0.639485524572976	0.271	0.637	0
SNTB2	0	-0.640699402671126	0.502	0.754	0
SYNGR2	0	-0.64094337151708	0.77	0.914	0
ALDH1A2	0	-0.641200195071705	0.131	0.579	0
CALD1	0	-0.643677999607455	0.981	0.998	0
TMTC1	0	-0.647242707792948	0.029	0.55	0
PLSCR4	0	-0.648711628452733	0.354	0.741	0
NPY	0	-0.651885914242094	0	0.395	0
CCNL1	0	-0.655238875147872	0.513	0.774	0
STMN3	0	-0.65855006506419	0.097	0.613	0
ACKR4	0	-0.66294226339889	0.111	0.566	0
RBM39	0	-0.668035071807445	0.88	0.955	0
AHNAK2	0	-0.668535316548249	0.331	0.709	0
ARL5A	0	-0.670152443095839	0.806	0.913	0
EVL	0	-0.672778351181803	0.47	0.753	0
DIXDC1	0	-0.674763904304011	0.37	0.728	0
GJA5	0	-0.675568054675544	0.037	0.541	0
SERPING1	0	-0.682572816150527	0.025	0.548	0
IL6ST	0	-0.684870456667835	0.669	0.878	0
STOM	0	-0.689821266868491	0.791	0.915	0
GBP4	0	-0.693317524156227	0.113	0.599	0
SCX	0	-0.694351391978759	0.02	0.58	0
PSIP1	0	-0.696441654400652	0.294	0.719	0
CDV3	0	-0.696672341669708	0.551	0.799	0
TAX1BP1	0	-0.699129825887767	0.704	0.89	0
GLUL	0	-0.699157277168815	0.625	0.831	0
HMGN3	0	-0.701714441628051	0.951	0.992	0
FSTL1	0	-0.70442574239641	0.762	0.901	0
HSPA2	0	-0.707120589167062	0.243	0.666	0
IL13RA1	0	-0.707365973455343	0.337	0.727	0
ALAS2	0	-0.708577259368277	0	0.544	0
N4BP2L2	0	-0.709476804349559	0.674	0.887	0
RSPO3	0	-0.713029999392393	0.154	0.616	0
FNBP1	0	-0.714145160934248	0.435	0.778	0
ST8SIA6	0	-0.720375393335913	0.012	0.594	0
GABARAPL1	0	-0.721432956000167	0.485	0.792	0
EPB41L3	0	-0.721674304657367	0.48	0.804	0
CTTNBP2NL	0	-0.722140066899251	0.353	0.748	0
GDF7	0	-0.722460523718572	0.066	0.557	0
COL23A1	0	-0.726337563869949	0.007	0.609	0
KIAA1462	0	-0.728895699268815	0.319	0.727	0
PABPC1	0	-0.736034050351051	1	1	0
FN1	0	-0.738201198584568	0.992	0.999	0
SLC2A3	0	-0.739344323888108	0.181	0.556	0
ALDH2	0	-0.74059469982207	0.729	0.909	0
SELP	0	-0.745867888358159	0.072	0.638	0
NUAK1	0	-0.746718123984627	0.388	0.771	0
SDPR	0	-0.751251731969556	0.862	0.966	0
H1FX	0	-0.758428103736604	0.362	0.745	0
RUNX1T1	0	-0.758796991074058	0.431	0.805	0
IL33	0	-0.760656818811867	0.232	0.714	0
HLA-DRB1	0	-0.761422862983796	0	0.607	0
COL1A2	0	-0.761892734969587	0.076	0.588	0
EIF4B	0	-0.763450805528845	0.911	0.975	0
LIMA1	0	-0.763888604253973	0.47	0.83	0
DDX17	0	-0.765082354864248	0.691	0.892	0
NPEPPS	0	-0.765975392576856	0.424	0.8	0
GULP1	0	-0.772239244213198	0.18	0.686	0
IER3	0	-0.776300944741289	0.744	0.929	0
ANKRD37	0	-0.781193061233135	0.226	0.68	0
CRIM1	0	-0.781628771978483	0.693	0.872	0
GMDS	0	-0.783957241388202	0.539	0.842	0
PPIC	0	-0.792987351058877	0.745	0.919	0
PGM5	0	-0.79340814306957	0.02	0.642	0
DSTN	0	-0.794071765689838	0.999	1	0
RND3	0	-0.795794783724428	0.275	0.7	0
WWTR1	0	-0.796189977718939	0.93	0.984	0
PGRMC2	0	-0.798713546536089	0.53	0.82	0
PECAM1	0	-0.799221335159618	0.988	1	0
ITSN2	0	-0.800331872907513	0.442	0.829	0
KTN1	0	-0.800632806983894	0.849	0.966	0
TSPAN7	0	-0.800975059482238	0.424	0.775	0
FOXP1	0	-0.801051328307398	0.687	0.892	0
LIFR	0	-0.802161090437133	0.195	0.696	0
FGD5-AS1	0	-0.802402230625564	0.476	0.823	0
LEPR	0	-0.803113975433178	0.131	0.69	0
CYYR1	0	-0.803473032481606	0.303	0.766	0
MMP28	0	-0.807979897494664	0.181	0.73	0
S100A9	0	-0.808177612830889	0	0.672	0
ADCY4	0	-0.811352747674123	0.262	0.759	0
KCTD12	0	-0.821242372836338	0.732	0.926	0
DDIT4	0	-0.837140340442339	0.667	0.894	0
ANXA3	0	-0.838973603815451	0.516	0.856	0
LMO2	0	-0.839600985113788	0.375	0.81	0
HIST1H1E	0	-0.849954230272381	0.032	0.66	0
ABLIM1	0	-0.856082076456333	0.478	0.847	0
C1R	0	-0.857148394253959	0.024	0.625	0
CCDC80	0	-0.858571597366709	0.246	0.692	0
SEC62	0	-0.862190511425761	0.842	0.975	0
NFIA	0	-0.867867536385538	0.451	0.824	0
SYNPO	0	-0.875356601085534	0.549	0.872	0
TACC1	0	-0.881505864849984	0.842	0.967	0
IER2	0	-0.881821202132019	0.953	0.972	0
GUCY1A3	0	-0.882580178217036	0.05	0.693	0
COX7A1	0	-0.882813335389677	0.562	0.897	0
LTBP4	0	-0.888955903016659	0.305	0.803	0
FBLN5	0	-0.891895218400546	0.046	0.69	0
AC004540.4	0	-0.894343757050732	0.066	0.701	0
MMP2	0	-0.896026032368094	0.875	0.976	0
CD34	0	-0.902424342120393	0.285	0.896	0
PCMTD1	0	-0.905883952291727	0.32	0.814	0
LTBP3	0	-0.908069800650779	0.423	0.848	0
EMP2	0	-0.913807311093475	0.582	0.917	0
IFITM1	0	-0.91552594927893	0.448	0.867	0
NBEAL1	0	-0.921038500266782	0.765	0.956	0
SULF2	0	-0.925137750949351	0.226	0.802	0
FAM110D	0	-0.930091563536067	0.007	0.719	0
MALAT1	0	-0.932070964216571	0.997	1	0
ARL4A	0	-0.932424537102396	0.594	0.896	0
SYNE2	0	-0.936829368673512	0.207	0.772	0
BMX	0	-0.940856539783935	0.774	0.941	0
CPXM2	0	-0.941206350826291	0.162	0.774	0
FAM89B	0	-0.94370188260204	0.263	0.788	0
SKIL	0	-0.95411756566266	0.623	0.919	0
LMCD1	0	-0.959188960831739	0.333	0.835	0
RP11-160E2.6	0	-0.960261100004504	0.017	0.622	0
HLA-E	0	-0.969400747000429	0.984	1	0
ADGRG6	0	-0.970912944359412	0.29	0.846	0
ITPR2	0	-0.971201689496605	0.395	0.865	0
FOSB	0	-0.991862251381396	0.084	0.704	0
BMPR2	0	-1.0006096223847	0.564	0.898	0
LITAF	0	-1.00815952227412	0.71	0.952	0
DKK3	0	-1.00942721141106	0.292	0.809	0
NDRG1	0	-1.01377131071692	0.298	0.833	0
YWHAH	0	-1.01431854565379	0.495	0.877	0
SPARCL1	0	-1.01519191357872	0.004	0.551	0
ACKR1	0	-1.01694476783603	0.006	0.536	0
KLF4	0	-1.01712740995627	0.253	0.817	0
TIMP1	0	-1.0237789949092	0.995	1	0
IGFBP3	0	-1.02496518764625	0.015	0.564	0
RAB11FIP1	0	-1.0295390944738	0.073	0.744	0
ARID5B	0	-1.03604334074441	0.178	0.744	0
CDC42EP5	0	-1.05185462645771	0.115	0.806	0
PTPRB	0	-1.05332386025703	0.482	0.898	0
PLPP3	0	-1.05332682808552	0.426	0.882	0
RAB3C	0	-1.06825022114635	0.043	0.752	0
IGFBP4	0	-1.0797899150174	0.886	0.991	0
SPTAN1	0	-1.08644514354309	0.686	0.946	0
TGM2	0	-1.08762750353877	0.942	0.997	0
FGF18	0	-1.09501058253309	0.036	0.75	0
LYL1	0	-1.10422215743671	0.187	0.849	0
HTRA1	0	-1.10772563959116	0.512	0.918	0
PTGS1	0	-1.11379207943577	0.291	0.859	0
BTG1	0	-1.11434825249966	0.727	0.964	0
NRG1	0	-1.12304907938232	0.157	0.791	0
CTGF	0	-1.13002569913815	0.926	0.997	0
ZFP36L2	0	-1.14279078393921	0.437	0.888	0
THBD	0	-1.14597906197756	0.26	0.822	0
SERPINE2	0	-1.15060723533698	0.182	0.796	0
COL3A1	0	-1.15668651249846	0.324	0.888	0
MPZL2	0	-1.17146001977514	0.269	0.89	0
LIMS2	0	-1.17787944028903	0.326	0.907	0
BRI3	0	-1.18770068882507	0.643	0.953	0
HAPLN3	0	-1.18894578239337	0.452	0.939	0
NUPR1	0	-1.19276825454619	0.068	0.803	0
SLC9A3R2	0	-1.19615602458305	0.444	0.927	0
NPW	0	-1.20301816430577	0.219	0.763	0
PTTG1IP	0	-1.2276603284914	0.894	0.994	0
IL1R1	0	-1.23220525308449	0.078	0.849	0
ZFP36	0	-1.2355846566902	0.171	0.822	0
CALCRL	0	-1.25793952992354	0.833	0.989	0
BMP4	0	-1.28532878567466	0.284	0.881	0
PLVAP	0	-1.30873879948502	0.12	0.857	0
IFITM2	0	-1.3093084635253	0.985	1	0
PALMD	0	-1.32619396660593	0.545	0.954	0
RNASE1	0	-1.33724589278202	0.987	1	0
MATN2	0	-1.34348340731726	0.087	0.872	0
VWF	0	-1.36749334608627	0.957	1	0
JUNB	0	-1.36933470871372	0.865	0.996	0
PNRC1	0	-1.37602793600427	0.263	0.931	0
SLCO2A1	0	-1.3795469070317	0.048	0.883	0
BTG2	0	-1.38280948875895	0.244	0.908	0
CD74	0	-1.39035607179267	0.059	0.87	0
IFITM3	0	-1.40474115681744	0.999	1	0
BGN	0	-1.42031741898016	0.948	1	0
PTMS	0	-1.42294352114597	0.844	0.996	0
SOCS3	0	-1.43597773524407	0.398	0.904	0
CYP1B1	0	-1.46047741771226	0.063	0.881	0
PTGIS	0	-1.47560893802576	0.05	0.91	0
YBX3	0	-1.47980061152878	0.863	0.998	0
NNMT	0	-1.48122914891552	0.916	1	0
FBLN2	0	-1.48145322245915	0.03	0.884	0
C10orf10	0	-1.48172313651809	0.273	0.859	0
NPDC1	0	-1.50428658724904	0.911	0.999	0
GAS6	0	-1.50990355841191	0.371	0.964	0
HEG1	0	-1.51901035109548	0.343	0.944	0
IGF2	0	-1.53223996944332	0.313	0.952	0
ADIRF	0	-1.55878676622685	0.77	0.991	0
XIST	0	-1.58356560486828	0	0.929	0
TSC22D3	0	-1.59098350667288	0.232	0.956	0
OMD	0	-1.60234054692771	0	0.866	0
KLF2	0	-1.66543726596771	0.387	0.964	0
RAC1	0	-1.66733207709391	0.885	0.999	0
SULF1	0	-1.68364649359606	0.416	0.991	0
IGFBP7	0	-1.73140141624229	0.95	0.999	0
ASS1	0	-1.74189750371176	0.142	0.968	0
LTBP2	0	-1.77856393745557	0.426	0.988	0
LTC4S	0	-1.84497637443382	0.026	0.967	0
RAMP3	0	-1.88779519431081	0	0.962	0
JUN	0	-1.90255591628653	0.732	0.995	0
CXCL2	0	-1.97935645713723	0.167	0.919	0
CRTAC1	0	-1.9822603426733	0.098	0.95	0
DCN	0	-2.01302544380853	0.144	0.92	0
DUSP1	0	-2.05499381778681	0.48	0.995	0
MGP	0	-2.14606421291651	0.999	1	0
HRCT1	0	-2.192939536786	0.049	0.981	0
ABI3BP	0	-2.19575804123723	0.055	0.988	0
CEBPD	0	-2.22633791307425	0.058	0.976	0
RAMP2	0	-2.29305441733097	0.668	1	0
CLU	0	-2.31273783439351	0.907	1	0
AQP1	0	-2.44941242535254	0.31	1	0
FOS	0	-2.46137425705605	0.085	0.989	0
TXNIP	0	-2.55772030950392	0.086	0.999	0
CPE	0	-2.94631258005576	0.549	1	0
ELN	0	-3.08042617232627	0.021	0.999	0
ITGA6	8.17634064462438e-308	0.490446231912999	0.57	0.061	1.97622153380571e-303
PRMT1	2.24626355506539e-307	0.558400151018592	0.934	0.668	5.42921901259306e-303
CMTM3	4.80236758174495e-306	0.508566745596146	0.711	0.202	1.16073224450775e-301
ATOH8	1.84064156845321e-305	0.507869096399883	0.559	0.056	4.44883067095142e-301
ITGB4	2.90492782417986e-305	-0.541022108189358	0.282	0.632	7.02121055104271e-301
OLFML2A	2.98605461790977e-305	-0.192447439192228	0.009	0.183	7.21729401148791e-301
BCAM	1.32080074690921e-304	-0.615992379008627	0.593	0.805	3.19237540527957e-300
TMOD3	1.62781514823058e-304	-0.579662512120711	0.692	0.832	3.93442921327332e-300
PHF19	2.1040608764737e-304	0.699450968828464	0.587	0.1	5.08551513843693e-300
MIR99AHG	5.56010458053178e-304	-0.506116963653439	0.22	0.568	1.34387727711453e-299
MRPS12	8.59115966438868e-304	0.509005498108572	0.897	0.541	2.07648329088274e-299
DDX24	1.30105330472863e-303	-0.522704238627601	0.776	0.892	3.1446458375291e-299
ARGLU1	1.53987294631818e-303	-0.541088673267016	0.808	0.908	3.72187291125105e-299
RTN4	2.64776146372619e-303	0.507458183161105	0.981	0.857	6.3996394578262e-299
ZNF43	1.60996641221353e-302	-0.300081202581716	0.049	0.308	3.89128881832011e-298
NDUFB10	1.76554424944903e-302	0.417799548801143	0.993	0.897	4.2673204509183e-298
ATP6V1F	4.05584410820104e-302	0.42414512617066	0.993	0.92	9.80297520952192e-298
CKAP4	9.40530381049167e-302	0.544061504559228	0.812	0.372	2.27326193099584e-297
PFDN5	1.0689945367812e-301	-0.302860259440202	1	1	2.58375979540016e-297
JUP	3.04499566985449e-301	0.509022418375634	0.708	0.21	7.3597545340383e-297
CAST	2.15463434606473e-299	-0.541584151808333	0.771	0.879	5.20775121443845e-295
HP1BP3	5.70717339373364e-299	-0.556972441786426	0.654	0.834	1.37942380926542e-294
CHURC1	1.11338210218083e-298	-0.55018955783368	0.703	0.85	2.69104454097106e-294
TSC22D4	7.2343185164746e-298	0.516840731590997	0.745	0.251	1.74853478543191e-293
PLOD1	1.09801549284034e-296	0.490751520362817	0.73	0.241	2.65390344619511e-292
FIBP	4.31464840466168e-296	0.471276485008401	0.941	0.665	1.04285051940673e-291
SRI	4.94792925575333e-296	0.50693671903312	0.975	0.823	1.19591450111558e-291
PRSS3	5.13596783330793e-295	0.630000461722092	0.478	0.002	1.24136342531053e-290
PHB2	5.65121369410533e-295	0.466790683642737	0.966	0.732	1.36589834986526e-290
PREX2	1.5689062472411e-294	-0.530555469144557	0.264	0.604	3.79204639958173e-290
LAMC1	3.72761629527439e-294	0.477665500329778	0.729	0.233	9.0096485856782e-290
BIRC5	7.02895577148755e-294	0.927148668603601	0.487	0.012	1.69889860996854e-289
PROS1	8.25363443209271e-294	-0.37178131565123	0.097	0.401	1.99490344223681e-289
FOXC1	3.82077342898877e-293	-0.588868336508856	0.352	0.666	9.23480937786586e-289
MIR4435-2HG	9.08804298509429e-293	0.557937977643948	0.857	0.446	2.19657998949729e-288
ECHS1	9.50237212515622e-293	0.506410864990337	0.928	0.622	2.29672334265026e-288
SERINC1	1.91946779643098e-292	-0.583409697631406	0.462	0.724	4.63935366397368e-288
PFN2	2.90853333363075e-292	0.503119325959398	0.805	0.337	7.02992506738553e-288
CRISPLD2	5.75873872854151e-292	-0.16919973682254	0.003	0.145	1.39188715068848e-287
ARG2	1.03847768880947e-290	0.408052001578992	0.502	0.023	2.51000057385249e-286
PRKCDBP	2.6174361050713e-290	0.605307930387316	0.965	0.826	6.32634306595734e-286
C8orf4	2.68125541600258e-290	0.692938033209846	0.797	0.38	6.48059434047825e-286
ERCC1	2.77770791120636e-290	0.488765031616864	0.873	0.476	6.71372002138576e-286
C12orf75	4.09927929677761e-290	0.569885472334514	0.525	0.046	9.90795806031148e-286
AXL	1.04175213896444e-289	0.568787357316613	0.485	0.012	2.51791491987705e-285
C1QBP	1.26723957520836e-289	0.487105153644735	0.962	0.786	3.06291805327861e-285
CITED4	7.59965699292244e-289	-0.369508825644848	0.072	0.35	1.83683709518935e-284
MRPS15	1.40269063632652e-288	0.469757593860733	0.948	0.698	3.3903032680012e-284
PLXDC2	1.96204821787804e-288	-0.260329150903654	0.041	0.282	4.74227054261123e-284
SPATC1L	3.07129233820537e-287	0.46297225760958	0.632	0.141	7.42331358144238e-283
MORF4L1	6.18634312428984e-287	-0.39407238368057	0.989	0.994	1.49523913314085e-282
HHIP-AS1	1.49582206992145e-286	0.655722223996356	0.756	0.315	3.61540194300014e-282
TNFSF10	1.53027124228846e-286	-0.61287118140945	0.601	0.862	3.69866559261122e-282
OSTC	2.00738164384534e-286	0.427646591479241	0.99	0.91	4.85184143317419e-282
CCPG1	2.10631265852561e-286	-0.597582991472757	0.404	0.7	5.0909576956564e-282
SNRPE	3.00445439814591e-286	0.39813031323062	0.996	0.941	7.26176628031866e-282
EID1	3.34486676971368e-286	-0.395403601849255	0.99	0.994	8.08454298239796e-282
APLNR	5.21817293370339e-286	-0.153620352056496	0.001	0.132	1.26123239807611e-281
MARCKSL1	1.07880361166103e-285	0.467484611833863	0.997	0.964	2.60746832938471e-281
NR3C1	1.23137859289665e-285	-0.497273601662456	0.234	0.568	2.97624205903119e-281
NCOA7	1.58191273405142e-285	-0.525548491202739	0.257	0.591	3.82348307820227e-281
HOMER3	1.74014125545226e-284	0.625895379088285	0.858	0.463	4.20592141442812e-280
COL18A1	4.09347361317876e-284	0.559658944008083	0.883	0.506	9.89392572305307e-280
FGF2	2.33890201994281e-283	-0.342390694029514	0.082	0.369	5.65312618220177e-279
LRRC16A	2.80706644103852e-283	-0.402686034535475	0.126	0.443	6.7846795879901e-279
CCNG1	3.78731394233206e-283	0.52258866451823	0.897	0.525	9.15393779861659e-279
NRP1	4.57401124224143e-283	0.403563059854737	0.499	0.027	1.10553851724975e-278
EHBP1L1	5.38364152878344e-283	-0.235086976277892	0.03	0.249	1.30122615750696e-278
MORF4L2	6.10034584998825e-283	0.492473016448698	0.959	0.766	1.47445359194216e-278
PABPC3	1.19679819852751e-282	-0.179616996219886	0.01	0.18	2.89266124584099e-278
BAZ2B	1.7801989580273e-282	-0.551340084640816	0.302	0.62	4.30274088155198e-278
TRIAP1	2.21416755519945e-282	0.487984266069438	0.798	0.356	5.35164298091707e-278
SERPINB1	4.15296687222063e-282	-0.585767425982426	0.508	0.758	1.00377209301573e-277
MAML1	7.90491381838102e-282	-0.484695189393447	0.211	0.541	1.91061766990269e-277
PRPF6	8.16125959743588e-282	-0.541848003152481	0.616	0.8	1.97257644470025e-277
SCAF11	1.10021960711504e-281	-0.552518991682062	0.716	0.842	2.65923079039704e-277
SERTAD4-AS1	6.03988068800573e-281	-0.555464220065741	0.384	0.697	1.45983916229099e-276
AC004556.1	8.39867335298683e-281	0.374153126072279	0.46	0.001	2.02995934941692e-276
THAP5	1.15294792533477e-280	-0.354468802073169	0.086	0.373	2.78667513553413e-276
MYLIP	1.58225992107857e-280	-0.496462022092373	0.227	0.56	3.82432222924691e-276
FXYD5	1.85871411850883e-280	-0.328112166441477	0.998	1	4.49251202443584e-276
CRBN	1.98024535764738e-280	-0.560833091656264	0.485	0.736	4.78625302943371e-276
SSSCA1	2.11819914629645e-280	0.48005988009965	0.823	0.387	5.11968733659853e-276
C7	4.79210185506152e-280	-0.282964556672236	0.03	0.247	1.15825101836837e-275
RP11-108M9.4	5.33681352110949e-280	-0.334856236052331	0.079	0.36	1.28990782805216e-275
RBP1	1.26391874879752e-279	-0.556352697050728	0.68	0.919	3.0548916158436e-275
SYF2	2.16535031923704e-279	-0.503946298357281	0.84	0.906	5.23365172159593e-275
BCKDK	5.06082042845551e-279	0.475974401401147	0.814	0.371	1.2232002975577e-274
GCC2	2.02804353953595e-278	-0.549411959050567	0.332	0.648	4.90178123505839e-274
TIMM10	2.70188749955103e-278	0.502860901629929	0.852	0.459	6.53046208641483e-274
AFF1	5.84343515573598e-278	-0.379182143660034	0.118	0.427	1.41235827714139e-273
P4HA3	2.65069678900347e-277	0.451892832784767	0.509	0.04	6.4067341390214e-273
FAXDC2	7.25371438097894e-277	-0.236664615519075	0.027	0.237	1.75322276588261e-272
FCER1G	7.92158950820667e-277	-0.183824146852682	0.011	0.181	1.91464818413355e-272
RDH13	1.85138483224853e-276	-0.430039851210629	0.144	0.462	4.4747971395447e-272
UROS	2.0275631534645e-276	0.45054786487432	0.743	0.268	4.90062014192369e-272
ASH1L	2.71026442612463e-276	-0.48383204829982	0.222	0.547	6.55070911794323e-272
PLAC9	7.64296578534101e-276	-0.594671836514854	0.374	0.698	1.84730483031692e-271
HIST1H1C	8.76450696562293e-276	-0.530548506907722	0.237	0.562	2.11838133359106e-271
UBE2C	1.03166640314758e-275	1.23939366161428	0.475	0.019	2.49353769640771e-271
GIMAP4	2.45768843373074e-275	0.589481913309919	0.932	0.671	5.94023294432721e-271
TK1	2.73175186882299e-275	0.805991668580156	0.497	0.044	6.60264426694516e-271
ATP5J2	3.27243419836659e-275	0.43276328235029	0.982	0.859	7.90947345745205e-271
VSTM4	3.59851864617474e-275	-0.202466052724773	0.019	0.208	8.69761956780435e-271
TGFB1I1	5.89506350910001e-275	0.510474238345771	0.868	0.498	1.42483685014947e-270
STAT3	1.15953939327317e-274	-0.558849729348896	0.581	0.785	2.80260671354126e-270
CENPW	1.32472827915144e-274	0.829213797620611	0.601	0.162	3.20186825070902e-270
LSR	1.66387521015613e-274	-0.496825476948767	0.215	0.535	4.02158638294737e-270
STXBP6	4.39017097528753e-274	-0.193889317293289	0.01	0.174	1.061104324727e-269
LPCAT2	5.11549582818119e-274	-0.551956047950068	0.37	0.663	1.23641534167139e-269
CDK4	5.91521375954864e-274	0.517153897280414	0.888	0.551	1.42970716568291e-269
EFEMP1	9.80079713480866e-274	-0.587725150969538	0.977	0.995	2.36885266748325e-269
ARHGDIA	1.23399914363057e-273	0.476620467171714	0.963	0.759	2.98257593015509e-269
MESDC1	1.24824810053876e-273	-0.543281130273077	0.348	0.648	3.01701565900219e-269
MLLT4	1.28090490762002e-273	-0.5121062826587	0.305	0.62	3.09594716171759e-269
RP5-1172A22.1	2.66326389239798e-273	-0.12732587729675	0.001	0.124	6.43710882792591e-269
LYPLA1	4.66709055569675e-273	0.485443326539236	0.862	0.466	1.12803578731191e-268
LINC00694	9.64624972412758e-273	-0.161612818508803	0.006	0.154	2.33149855832164e-268
TMBIM1	5.65368971540444e-272	-0.568002399929788	0.452	0.711	1.36649680421325e-267
CTB-178M22.2	8.5832560005492e-272	-0.158345062241561	0.007	0.16	2.07457297533274e-267
VAMP2	5.67285238278715e-270	-0.484735474508619	0.846	0.905	1.37112842091965e-265
OSTF1	2.57412520020695e-269	0.435201978147256	0.71	0.224	6.2216606089002e-265
NDUFB7	7.19722425289131e-269	0.379271350835388	0.994	0.915	1.73956910192383e-264
CARD8	1.31915793405249e-268	0.516588166422494	0.866	0.509	3.18840472660487e-264
GALK1	2.54113921323693e-268	0.446481860039523	0.685	0.211	6.14193347839365e-264
EBPL	4.15620659767411e-268	-0.541690733602347	0.533	0.76	1.00455513465783e-263
FNIP2	5.02683378975623e-268	-0.371831470868945	0.113	0.411	1.21498572698408e-263
RBX1	5.77904081154889e-268	0.388366867797232	0.993	0.924	1.39679416415137e-263
MRPS25	1.04058672163852e-267	0.464067918458605	0.822	0.405	2.51509810620031e-263
VDAC1	2.56307211162661e-267	0.446858448270775	0.961	0.747	6.19494529380153e-263
DDA1	5.44996879736823e-267	0.455732096198408	0.797	0.343	1.3172574583239e-262
S100A11	8.08209334474569e-267	0.375819376737164	1	0.994	1.95344196142503e-262
PHACTR2	8.40744342372942e-267	-0.56770106130322	0.66	0.821	2.0320790755154e-262
SBDS	8.82794652451955e-267	-0.517703888238251	0.764	0.875	2.13371467497638e-262
PCM1	1.227371294958e-266	-0.541548629907468	0.433	0.703	2.96655641991348e-262
GFOD1	4.44095440773548e-266	-0.467221982856456	0.222	0.549	1.07337868034967e-261
NNAT	1.14087895939881e-265	0.471148028789767	0.491	0.035	2.75750444486692e-261
CRYBB2	1.22241102242392e-265	-0.159886598291605	0.006	0.154	2.95456744119861e-261
ACADVL	1.37317946305709e-265	0.468839929606829	0.843	0.436	3.31897476220899e-261
SOX2	2.12763022759384e-265	-0.163530076050859	0.004	0.139	5.14248226009432e-261
PYCR1	4.41630875791733e-265	0.422567092678503	0.603	0.131	1.06742182678862e-260
SLC16A4	1.01564102574202e-264	-0.251431176656484	0.038	0.262	2.45480435921846e-260
HSPA8	1.69116573173747e-264	0.489292928795828	0.99	0.949	4.08754757360947e-260
EPHA2	1.36182084128393e-263	0.424685691372434	0.614	0.141	3.29152097338327e-259
TLK1	1.55718847131216e-263	-0.48635786875533	0.275	0.592	3.76372453516148e-259
FILIP1L	2.39058891274427e-263	-0.630167364717773	0.332	0.634	5.7780534021029e-259
DDX3X	4.29281124237288e-263	-0.556849083955981	0.561	0.76	1.03757247728153e-258
GALNT10	6.22893744787556e-263	-0.430466896490319	0.18	0.499	1.50553418115152e-258
TM4SF18	6.96330124301957e-263	0.474243201584104	0.512	0.056	1.68302991043783e-258
ADGRL4	8.95760868176374e-263	0.488709950841595	0.91	0.61	2.1650540183823e-258
MRPS7	2.64529746106832e-262	0.462542560275915	0.853	0.462	6.39368396340212e-258
SAP30	2.826291313391e-262	-0.264245884355694	0.054	0.298	6.83114610446604e-258
LCORL	8.10479858310501e-262	-0.434710386850367	0.171	0.486	1.95892981753648e-257
SCN3B	2.33304674839736e-261	-0.312131522993615	0.072	0.337	5.63897399087641e-257
MPST	2.91910421167275e-261	0.445837616177445	0.979	0.789	7.05547487961304e-257
CTSO	7.39913029709983e-261	-0.346143727960314	0.095	0.379	1.78836979280903e-256
DPEP2	1.53681321644189e-260	-0.143296670523762	0.005	0.142	3.71447754414004e-256
C9orf3	1.99495948830966e-260	-0.438040904995688	0.177	0.489	4.82181708324445e-256
TSPAN6	4.89912475465575e-260	-0.551460326113719	0.51	0.74	1.18411845320029e-255
ECI1	9.36031894804335e-260	-0.361279855717245	0.117	0.411	2.26238908974208e-255
HSPA1B	1.15406265897949e-259	-0.283971873312797	0.044	0.271	2.78936944675344e-255
SOX17	1.20151826130202e-259	0.485196471531788	0.437	0.002	2.90406963756697e-255
S100A10	1.27838149577912e-259	-0.298784868126158	1	1	3.08984807529813e-255
KLF3	6.68353678260441e-259	-0.578833711715852	0.582	0.78	1.61541084035549e-254
C16orf74	9.85672522192345e-259	0.435461989952461	0.464	0.023	2.3823704861389e-254
RP11-1223D19.1	1.16227771227662e-258	-0.193989107460861	0.02	0.206	2.80922523057259e-254
PGD	1.39102154516976e-258	0.446428411639235	0.765	0.321	3.36209907467532e-254
GABRB3	3.66695178142463e-258	-0.135956113559498	0.002	0.125	8.86302245570332e-254
WDR18	5.66751729649531e-258	0.455458980392915	0.754	0.314	1.36983893056292e-253
JAM2	1.40446449604848e-257	-0.496398387552737	0.269	0.582	3.39459068694918e-253
CFAP97	1.42987454752574e-257	-0.506221789952978	0.356	0.646	3.45600678136972e-253
REXO2	7.56622075987234e-257	0.480016759860252	0.952	0.771	1.82875555766115e-252
ZNHIT1	3.45651967744079e-256	0.378882176090729	0.994	0.919	8.35440806037439e-252
LOXL2	3.99191662827688e-256	0.39995546123751	0.543	0.083	9.64846249054522e-252
EVI5	5.56815720007123e-256	-0.507437046886735	0.312	0.613	1.34582359525722e-251
PTGR1	1.00002594511348e-255	0.479421875071638	0.701	0.254	2.41706270933928e-251
FGFR3	1.49183199903666e-255	-0.229440039760099	0.027	0.227	3.60575794167159e-251
SLC44A2	1.87466108770662e-255	-0.541955023082621	0.493	0.73	4.5310558489869e-251
LDLRAD4	1.93419788223552e-255	-0.326079341260248	0.083	0.353	4.67495628136325e-251
NUCB1	4.70427627064922e-255	-0.481122021800473	0.839	0.916	1.13702357461592e-250
CLDN11	6.0063050669097e-255	0.64304064382542	0.473	0.035	1.45172393467207e-250
MBNL2	7.82190907017945e-255	-0.487302980694663	0.282	0.589	1.89055542226237e-250
BPTF	1.10002901093412e-254	-0.540346023114096	0.483	0.714	2.65877011942777e-250
ZNF708	1.67491348754241e-254	-0.226629096764704	0.03	0.233	4.04826589939e-250
CHD3	2.27346816154282e-254	-0.545458061471652	0.399	0.67	5.49497254644899e-250
HYAL1	4.07614139670158e-254	-0.180494372311648	0.011	0.171	9.85203375582772e-250
CALCOCO2	5.99011775362046e-254	-0.528368560325593	0.382	0.661	1.44781146105006e-249
WISP2	9.81011626770357e-254	-0.122641210396251	0	0.112	2.37110510190395e-249
NINJ2	1.68468325130154e-253	-0.206566181341939	0.024	0.215	4.07187941839583e-249
RARRES3	6.00052791629912e-253	-0.417134037612924	0.181	0.5	1.4503275973695e-248
THUMPD3-AS1	1.54832820195943e-252	0.476037973374412	0.775	0.332	3.74230926413594e-248
LAPTM4A	3.60527538413424e-252	-0.441128365094199	0.953	0.984	8.71395060345246e-248
DCUN1D5	4.91021304044352e-252	0.457153842227062	0.732	0.289	1.1867984918752e-247
C10orf128	1.7379962516124e-251	-0.275450308769689	0.047	0.275	4.20073694014718e-247
TLR5	2.12728422337905e-251	-0.136989597689827	0.004	0.136	5.14164596790717e-247
PSMD7	3.37381966113985e-251	0.505623655048088	0.911	0.668	8.15452212097502e-247
CCT5	5.378428661096e-251	0.540659775588432	0.882	0.584	1.2999662073869e-246
LHFP	7.59859809143099e-250	-0.480198995472898	0.285	0.598	1.83658115869887e-245
EIF6	7.62677167946894e-250	0.453866781354378	0.931	0.688	1.84339071492764e-245
CHCHD1	8.91248291883789e-250	0.446155434903268	0.861	0.495	2.15414712148312e-245
BCL2L12	1.11220503486116e-249	0.465307732105223	0.603	0.152	2.68819956925942e-245
NOP10	7.03781945601908e-249	0.370533759545592	0.997	0.961	1.70104096251981e-244
UQCRC1	7.38594456585155e-249	0.465656457045113	0.864	0.525	1.78518280156632e-244
BZW2	1.39286875207422e-248	0.437677996546274	0.714	0.26	3.36656377376338e-244
ACTN1	2.01934715530462e-248	-0.44557031955759	0.956	0.968	4.88076207437126e-244
VPS13A	3.16798878492816e-248	-0.430785552674428	0.192	0.501	7.65702889317135e-244
LINC00152	3.8641413124334e-248	0.520620041664232	0.886	0.576	9.33962955215153e-244
SF3B6	6.5509282514985e-248	0.398913009936391	0.992	0.905	1.58335935838719e-243
C14orf166	1.33933032960073e-247	0.382399313885659	0.989	0.912	3.23716140664497e-243
ASRGL1	1.70885955457742e-247	-0.533943461791567	0.647	0.806	4.13031354341362e-243
TIMM17A	1.89480085308915e-247	0.458073137702352	0.79	0.371	4.57973366191648e-243
SERTAD4	5.27492006874193e-247	-0.340725438886919	0.096	0.373	1.27494818061492e-242
MRAS	1.06366075849286e-246	-0.542190169273001	0.199	0.499	2.57086805327723e-242
FBXO34	1.34983291802329e-246	-0.399007135460045	0.125	0.414	3.2625461628623e-242
MRPL4	1.38349305588527e-246	0.444759841073373	0.84	0.45	3.3439027160747e-242
CALR	1.86040782249171e-246	0.481014360873478	0.988	0.892	4.49660570696247e-242
CXorf36	2.69194010478327e-246	0.51090156259978	0.809	0.422	6.50641923326117e-242
HOXA6	3.53186979383915e-246	-0.25287527106887	0.045	0.269	8.53652929170923e-242
MLF2	5.75633591789185e-246	0.434883741270683	0.937	0.685	1.39130639135446e-241
PLPP1	7.78352014593055e-246	-0.429213399989645	0.192	0.494	1.88127681927141e-241
DNAJC1	1.03083003786653e-245	-0.499683635064531	0.371	0.648	2.49151620152341e-241
ZBTB7A	1.53182482587303e-245	-0.406088656502755	0.167	0.47	3.70242060413512e-241
DDX5	2.80611411070401e-245	-0.405368251487331	0.983	0.989	6.78237780557159e-241
GFER	3.95145624217742e-245	0.416507108013419	0.731	0.278	9.55066973734283e-241
COPS8	4.545943805567e-245	0.465317152982653	0.855	0.49	1.09875461780554e-240
CDON	5.46882361307084e-245	-0.187002446993261	0.016	0.184	1.32181466727922e-240
HSD17B12	5.73358711901722e-245	-0.532519106157004	0.583	0.769	1.38580800666646e-240
TWF2	1.03327569932177e-244	0.445250114667531	0.813	0.398	2.49742736526071e-240
RP11-382A20.3	1.08496391771116e-244	-0.536506633191704	0.6	0.76	2.62235778910786e-240
SOCS2	1.1721101905801e-244	-0.257446899789206	0.048	0.276	2.83299033063211e-240
MOB2	3.23067204430837e-244	-0.527791837146042	0.538	0.741	7.80853433109334e-240
IGLC2	3.38247203973013e-244	-0.109367889157774	0	0.108	8.17543492002772e-240
RAC2	4.89540744748824e-244	0.411796119578366	0.573	0.119	1.18321998005791e-239
ICAM1	5.68505306253586e-244	-0.411174107304978	0.128	0.425	1.37407732521492e-239
TMEM120A	2.23200658520338e-243	-0.563497874610644	0.507	0.725	5.39475991643658e-239
BACE2	2.65280308019761e-243	-0.517244468190158	0.476	0.726	6.41182504483761e-239
HSPB8	3.25133181103682e-243	-0.185058961935133	0.016	0.183	7.858468987276e-239
TPBG	5.91518565284154e-243	-0.376617105066773	0.111	0.389	1.4297003722918e-238
FDXR	6.10152231814663e-243	0.392063702068607	0.498	0.062	1.47473794429604e-238
MDFI	1.39597041344388e-242	0.423728802321318	0.664	0.202	3.37406048929385e-238
RNF13	1.65744708128833e-242	-0.471554325749431	0.257	0.561	4.0060495954739e-238
ELF2	2.33548170836733e-242	-0.450214234157133	0.24	0.549	5.64485928912384e-238
JPH4	3.27872602219668e-242	-0.12958599103708	0.002	0.118	7.92468079564938e-238
MMP24-AS1	4.66820297982577e-242	0.456990469296908	0.894	0.561	1.12830466022389e-237
CAMK1D	6.41085767244252e-242	-0.207517033677298	0.027	0.218	1.54950429942936e-237
TMEM255B	2.49575581728345e-241	0.443678337194911	0.874	0.524	6.0322418103741e-237
RP13-1039J1.2	3.98089020472637e-241	-0.194555254515745	0.021	0.198	9.62181162482364e-237
WWC2	4.54100049745511e-241	-0.389834383719506	0.149	0.444	1.0975598202349e-236
CDCA7L	5.35321738682693e-240	0.368757630896594	0.502	0.065	1.29387264239607e-235
LGALS3	2.7224581628051e-239	-0.528735376640819	0.757	0.88	6.58018137949991e-235
MRPS34	3.20283521409126e-239	0.433567459417707	0.933	0.683	7.74125271245857e-235
RP11-793H13.3	5.05474528989817e-239	-0.123688856001194	0.001	0.111	1.22173193656839e-234
IFIT1B	5.12832334925847e-238	-0.12093540306944	0	0.105	1.23951575351577e-233
SEPP1	5.32036358904477e-238	-0.308458000495013	0.076	0.334	1.28593187947212e-233
GLRX3	6.84535980383151e-238	0.424495300645834	0.911	0.633	1.65452346458608e-233
RBPMS	9.84296901220619e-238	-0.479598564721853	0.288	0.578	2.37904561025024e-233
TEK	1.4219131288923e-237	-0.507523444508731	0.397	0.661	3.43676403253269e-233
CTSF	1.4843165765569e-237	-0.441741116257705	0.216	0.52	3.58759316553803e-233
IGF2BP3	1.73156914651774e-237	0.346050374824692	0.439	0.022	4.18520262713339e-233
STK25	2.65546345176232e-237	0.434646884714138	0.867	0.492	6.41825516290953e-233
ATPIF1	7.18438386040878e-237	0.374036763109153	0.991	0.913	1.7364655790608e-232
RP11-14N7.2	3.44100789866355e-236	0.41937720064063	0.662	0.216	8.3169160910698e-232
ZBTB38	4.32176283496316e-236	-0.519198244154076	0.389	0.647	1.0445700772106e-231
HOXB4	7.68442068360527e-236	-0.369836954367287	0.126	0.41	1.85732447922739e-231
PRKCZ	5.42293073085103e-235	-0.227543915590826	0.038	0.245	1.31072235764669e-230
SNRNP25	1.19696842295286e-234	0.446162919815591	0.726	0.303	2.89307267827706e-230
SIK2	1.53864613114867e-234	-0.282451420916067	0.065	0.307	3.71890769898633e-230
EMP3	1.56418553984636e-234	-0.534748748182273	0.961	0.972	3.78063644980865e-230
ENTPD1	1.73222594002874e-234	-0.501951738345021	0.339	0.641	4.18679009704947e-230
HMOX1	2.04350473091161e-234	0.464620752368723	0.45	0.033	4.93915093461337e-230
NUDT1	2.77478562681371e-234	0.390749412828253	0.533	0.098	6.70665686000873e-230
OST4	3.93389306341805e-234	0.299816220323227	1	0.998	9.50821953428144e-230
PBX1	4.65558793028877e-234	-0.406091961205747	0.185	0.489	1.1252556027508e-229
F2R	4.74271838699256e-234	0.443694307394441	0.751	0.318	1.1463150341361e-229
DAD1	5.65476821187009e-234	0.407019528267984	0.989	0.924	1.366757476809e-229
C16orf13	6.63877865431785e-234	0.396828834590794	0.972	0.797	1.60459280074863e-229
NUDT14	1.38337083131559e-233	0.444116131827721	0.953	0.74	3.34360729928978e-229
CCT7	1.87890535951604e-232	0.470870856867778	0.919	0.673	4.54131425395026e-228
NOS1AP	2.59198413422135e-232	-0.170563621751323	0.014	0.17	6.264825652413e-228
NAMPT	3.21574668617498e-232	0.450789340776223	0.834	0.446	7.77245974048494e-228
LINC00493	3.5359781769624e-232	-0.422828705324076	0.917	0.93	8.54645925371813e-228
LINC00657	3.93736462181918e-232	-0.509463090471241	0.714	0.814	9.51661029093695e-228
MRPL36	7.13818001973333e-232	0.446866814421385	0.919	0.659	1.72529811076955e-227
S100A12	7.6864982373806e-232	-0.102128925978077	0	0.102	1.85782662397489e-227
RTCA	8.41104758626831e-232	0.391996669278635	0.661	0.219	2.03295020160105e-227
CCNB1	1.25581034630333e-231	0.797451284152659	0.438	0.032	3.03529360701514e-227
ASNA1	2.58021755081308e-231	0.424649946780381	0.806	0.42	6.23638582031522e-227
RGS10	1.12254101446347e-230	0.390613935323176	0.526	0.097	2.7131816319582e-226
EIF4E2	1.17707677986513e-230	0.406313179882722	0.921	0.625	2.84499457693402e-226
TGFB1	1.69670163960191e-230	0.442752196539406	0.911	0.599	4.10092786291781e-226
IFNAR1	2.8211570580857e-230	-0.499509789858235	0.364	0.63	6.81873660939315e-226
ZNF781	3.61829418782456e-230	-0.167050696949748	0.017	0.182	8.74541705197197e-226
N4BP2L1	4.56351603773301e-230	-0.21000823670631	0.028	0.215	1.10300182632007e-225
ANXA6	5.81113700332192e-230	0.414959421733265	0.763	0.341	1.40455181370291e-225
CD81	7.22580116963631e-230	-0.502700872073647	0.795	0.867	1.7464761427011e-225
PAICS	1.16988304326797e-229	0.450791795927945	0.715	0.294	2.82760731557868e-225
DYSF	1.80501059085788e-229	0.347168330135672	0.419	0.015	4.36271059810349e-225
VASP	5.65828330582748e-229	0.447134031979703	0.784	0.369	1.3676070750185e-224
STIM2	5.70089265671898e-229	-0.36478338972437	0.134	0.416	1.37790575512898e-224
CTHRC1	1.02228929684691e-228	0.503313261517209	0.4	0.003	2.47087323047897e-224
EVA1A	1.76438881981944e-228	0.332697389339339	0.417	0.014	4.26452777750358e-224
FAM213A	3.06929250623234e-228	0.396430580995106	0.997	0.963	7.41847998756357e-224
GRK5	3.32228680569357e-228	-0.478386136834304	0.337	0.622	8.02996720936135e-224
TNS1	3.70896951044124e-228	-0.435810824065149	0.232	0.531	8.96457930673647e-224
TAX1BP3	4.1326312180471e-228	0.421425017668994	0.938	0.69	9.98856965401984e-224
ZNF638	5.25745137839299e-228	-0.426455924654364	0.213	0.508	1.27072599815758e-223
PERP	6.08484951188388e-228	0.425677373629161	0.744	0.312	1.47070812702234e-223
ITGB1BP1	9.30473473650074e-228	0.431381940255022	0.944	0.732	2.24895438581223e-223
MAP1S	9.35677004169275e-228	0.358071618605208	0.559	0.118	2.26153131907714e-223
THNSL2	1.14167717744202e-227	-0.126197464135427	0.003	0.12	2.75943373787736e-223
CYR61	4.12684173929387e-227	-0.586730447548294	0.925	0.981	9.97457648387327e-223
GPBP1	7.03490128573538e-227	-0.492410165084247	0.424	0.664	1.70033564076224e-222
VKORC1	8.92479690782883e-227	0.361940413895034	0.984	0.91	2.15712341262223e-222
SPINT2	1.05551555811747e-226	-0.494179785638429	0.4	0.687	2.55118110396992e-222
KANK3	4.88839684273083e-226	-0.495410577777344	0.312	0.598	1.18152551688804e-221
NTMT1	1.04932353242629e-225	0.41574495784013	0.739	0.313	2.53621497787435e-221
ETV4	1.24474353579083e-225	0.312350084486026	0.393	0.001	3.00854512600643e-221
SLC4A1	2.08542775806788e-225	-0.131217959915084	0.001	0.105	5.04047889125007e-221
UBL3	2.45223739474553e-225	-0.387041806450075	0.175	0.467	5.92705778309996e-221
NARF	7.96620730533975e-225	0.4384528082905	0.858	0.506	1.92543230570062e-220
RRM2	2.17250585196191e-224	0.668163136931639	0.399	0.007	5.25094664419195e-220
ANAPC15	3.27626935820156e-224	0.418396867949041	0.746	0.33	7.91874303877317e-220
CENPN	1.44268759566515e-223	0.420321747215213	0.482	0.068	3.48697591872268e-219
PHF3	3.42112358478629e-223	-0.427059012242862	0.21	0.504	8.26885570442846e-219
GABARAPL2	3.49189247024388e-223	-0.382972063779543	0.945	0.952	8.43990410057947e-219
EDF1	7.29622624244678e-223	0.26637516318661	1	0.998	1.76349788279939e-218
GBP3	1.22644440203815e-222	-0.300962231987986	0.081	0.327	2.96431611972621e-218
TLN2	1.43685368278357e-222	-0.164948316733952	0.012	0.156	3.47287535128789e-218
CASC4	8.14351699503604e-222	-0.459406502015566	0.268	0.55	1.96828805770021e-217
CLTA	2.01274227049018e-221	0.319661302282932	0.997	0.966	4.86479806777478e-217
DHRS3	6.52025971494361e-221	-0.492747113925266	0.295	0.587	1.57594677310187e-216
MCTS1	6.9406508696473e-221	0.419783532251119	0.9	0.595	1.67755531519375e-216
SSBP1	6.96769423950651e-221	0.37955694878516	0.98	0.866	1.68409169768872e-216
MKNK2	3.3590961464382e-220	-0.508298728712906	0.419	0.667	8.11893538594113e-216
CDC20	3.77617020076122e-220	0.75653946325566	0.393	0.007	9.12700337523987e-216
PLSCR1	1.24709962397384e-219	-0.509084107624616	0.654	0.807	3.01423979114478e-215
ALOX5	2.84301411850395e-219	-0.104616130854298	0.001	0.106	6.87156512442405e-215
TFPI	4.14283160947705e-219	-0.407968414465498	0.98	0.994	1.0013224000106e-214
HES1	4.68975080229151e-219	-0.649698017076848	0.755	0.852	1.13351276891386e-214
TMEM205	7.77859499024903e-219	-0.474200495073563	0.732	0.84	1.88008640914319e-214
CNN2	1.56648343045371e-218	0.434879981668863	0.853	0.473	3.78619045140661e-214
TRIP11	2.02162947529323e-218	-0.469236647453294	0.286	0.567	4.88627844178373e-214
TP53I3	2.34107750322107e-218	0.436618403643238	0.712	0.3	5.65838432528532e-214
CAPN2	1.14165557666097e-217	0.443139293832565	0.863	0.539	2.75938152878956e-213
EIF2S2	5.94547255050665e-217	0.347919219418405	0.986	0.91	1.43702071545746e-212
HCST	6.77885285826908e-217	-0.114296238252145	0.004	0.119	1.63844873584364e-212
C7orf73	6.92099969241154e-217	0.415073422615923	0.88	0.557	1.67280562565587e-212
ILF2	1.09951963154175e-216	0.453181413757923	0.932	0.72	2.65753894943641e-212
BANF1	1.19909890306991e-216	0.385114373710811	0.98	0.863	2.89822204871997e-212
CDKN3	4.32473755187181e-216	0.664120778250696	0.41	0.024	1.04528906628742e-211
RAB5C	8.87384207141322e-216	0.348079977557787	0.985	0.899	2.14480762866057e-211
ACOT7	9.75095817106884e-216	0.397654825924308	0.595	0.172	2.35680658994734e-211
IFI6	2.55421139636214e-215	0.837608775452653	0.942	0.819	6.17352894500728e-211
HGS	3.36820862370879e-215	0.364794296166601	0.637	0.203	8.14096024350414e-211
KLF9	4.28259619789514e-215	-0.42451275724524	0.224	0.514	1.03510350103125e-210
FAM195A	6.20252942444227e-215	0.371929829662044	0.595	0.172	1.4991513618877e-210
GINM1	1.03257199674859e-214	-0.48960203990356	0.657	0.784	2.49572651614135e-210
CCND3	1.14205255304774e-214	-0.476993069734044	0.395	0.653	2.76034102071639e-210
CXCL8	1.60921616655807e-214	0.667888080036486	0.395	0.012	3.88947547457085e-210
LXN	2.30935997849652e-214	0.729817593254595	0.861	0.564	5.58172306802609e-210
CTXN1	2.31970456223734e-214	0.330116969135626	0.42	0.028	5.60672592692766e-210
PIN1	4.45038829174354e-214	0.39992165951842	0.945	0.744	1.07565885011441e-209
BLCAP	4.9890291893703e-214	-0.496606511822098	0.637	0.776	1.2058483550708e-209
ADGRG1	5.9684303679607e-214	0.330655830307443	0.408	0.019	1.4425696199361e-209
RGCC	7.21764413311368e-214	0.365834516208201	0.407	0.02	1.74450458697358e-209
CSDE1	1.20589497694935e-213	-0.403791315818109	0.925	0.934	2.91464815928658e-209
EMC6	3.47893999386276e-213	0.39502487337614	0.935	0.684	8.40859796516629e-209
SMARCB1	3.80482673061346e-213	0.396515925803708	0.796	0.394	9.19626620789273e-209
GSTM3	3.82268887255497e-213	0.446312995253807	0.787	0.408	9.23943900496536e-209
UBE2N	3.84429051279701e-213	0.416578637434944	0.876	0.548	9.29165016943038e-209
HMGA2	4.88892832176815e-213	0.378683233610649	0.446	0.05	1.18165397537136e-208
AAMDC	9.42735779061129e-213	-0.427850652438862	0.854	0.909	2.27859237799075e-208
PTX3	1.99820112043442e-212	0.830063594265258	0.376	0.001	4.82965210809001e-208
WDR34	4.51594088210543e-212	0.422212912522715	0.629	0.216	1.09150291120488e-207
IAH1	5.86413076266613e-212	0.378830910097855	0.705	0.277	1.4173604053364e-207
COL1A1	2.10663337360385e-211	-0.163250297927228	0.005	0.121	5.0917328640005e-207
ZDHHC12	2.42068311643824e-211	0.411779492355899	0.797	0.41	5.85079109243124e-207
GOLGB1	2.80903710331265e-211	-0.483200384266159	0.381	0.638	6.78944267870668e-207
EMD	1.16520139112177e-210	0.393301025424738	0.831	0.434	2.81629176234133e-206
CSNK2B	2.05193680230641e-210	0.369651203192751	0.982	0.867	4.9595312511746e-206
CCDC102A	3.35433043290676e-210	-0.209703969633224	0.033	0.219	8.10741665633564e-206
TLE1	3.75044139896865e-210	-0.467424899326945	0.339	0.605	9.06481686130722e-206
CLEC2B	3.81942306221978e-210	0.417344400066879	0.465	0.072	9.2315455413852e-206
COMMD4	2.01603798774959e-209	0.392650089915012	0.768	0.372	4.87276381639076e-205
LSAMP	8.53915286566882e-209	-0.135584911611063	0.008	0.134	2.06391324763215e-204
ARL6IP5	1.41703775151666e-208	-0.437034015719429	0.899	0.932	3.42498024541576e-204
KDR	1.5745457773212e-208	0.359193049113617	0.378	0.005	3.80567714378533e-204
CCDC186	2.17069365070861e-208	-0.373074048547167	0.156	0.431	5.2465665537627e-204
EMC8	4.16512639411235e-208	0.385606919642581	0.782	0.377	1.00671104945695e-203
B9D1	6.76352563967731e-208	0.316384210839579	0.503	0.091	1.63474414711001e-203
CKLF	2.38024192911409e-207	0.452318262563683	0.852	0.53	5.75304474266875e-203
ETV5	2.39506337357718e-207	0.296601926862346	0.401	0.019	5.78886817393605e-203
NKTR	3.79482602872288e-207	-0.498468597262275	0.486	0.693	9.1720945114232e-203
ATP8A1	4.22084043106383e-207	-0.204734048049514	0.035	0.221	1.02017713218813e-202
MT1E	5.31165351123488e-206	0.660202098343512	0.494	0.104	1.28382665366547e-201
NYNRIN	6.80695938173724e-206	-0.393673706806913	0.207	0.491	1.64524208256589e-201
NUCB2	9.20002652370342e-206	-0.464168730293416	0.687	0.833	2.22364641077912e-201
SHOC2	1.57548159989579e-205	-0.442346765063809	0.275	0.549	3.80793902694811e-201
BDNF	2.26530980128693e-205	-0.298012061202322	0.059	0.276	5.47525378971051e-201
CNIH4	2.54131876973531e-205	0.425750292929225	0.923	0.718	6.14236746645024e-201
CCT4	3.58419624187836e-205	0.41342243753535	0.934	0.709	8.66300231662e-201
CCDC69	5.12936943019719e-205	-0.363126999684063	0.142	0.409	1.23976859127866e-200
STUB1	7.17482542047038e-205	0.372922909766207	0.966	0.809	1.73415530412769e-200
TRIM56	8.32372559583402e-205	-0.4707023492992	0.352	0.61	2.01184447651308e-200
EXOC6	8.97299010718956e-205	-0.478778349290533	0.541	0.73	2.16877170890772e-200
COX7B	1.2127985367059e-204	0.348928102707377	0.981	0.884	2.93133406321815e-200
ESM1	1.64482731780777e-204	0.429297771671716	0.38	0.01	3.97554762714138e-200
H3F3A	2.77787078399673e-204	0.26100847491149	1	0.999	6.71411368492009e-200
FADS2	2.81646396411007e-204	0.318434792787227	0.39	0.017	6.80739340125405e-200
MCF2L	3.17456068248314e-204	-0.133768988345719	0.008	0.135	7.67291316956176e-200
PITPNA	3.24033280900934e-204	-0.456970193814715	0.374	0.623	7.83188439937558e-200
MRPL14	4.5535623650643e-204	0.37543534500142	0.95	0.741	1.10059602363604e-199
TRIB3	5.6336085744041e-204	0.324044499011942	0.391	0.017	1.36164319243347e-199
CORO1B	1.6865265740031e-203	0.411850139110635	0.855	0.512	4.07633472936549e-199
ZNF793	1.93941673553266e-203	-0.134882384471573	0.01	0.143	4.68757024978245e-199
RAB34	3.45936644580805e-203	0.420020400093393	0.757	0.363	8.36128869951807e-199
UQCRFS1	3.86419421732874e-203	0.364785542375225	0.961	0.798	9.33975742328356e-199
ARPC5L	6.47033216935552e-203	0.427373552104225	0.889	0.595	1.56387928533323e-198
LSM1	1.24442999017704e-202	0.386631909178173	0.841	0.483	3.00778728625792e-198
AC240274.1	1.50333581171522e-202	-0.157098576496988	0.015	0.16	3.63356265691569e-198
PSMD2	4.01813597288889e-202	0.431313044995933	0.796	0.439	9.71183464647244e-198
JUND	4.25360785574946e-202	-0.541789393071842	0.5	0.694	1.02809701873464e-197
TIMM50	4.29037263330155e-202	0.379379443565219	0.696	0.296	1.03698306546899e-197
EIF3I	4.35887816755148e-202	0.373040731689431	0.972	0.826	1.05354085309719e-197
PNP	5.75810227275551e-202	0.430262032495777	0.712	0.326	1.39173331932501e-197
NKAIN2	1.23949277442293e-201	-0.106767005147538	0.002	0.101	2.99585403578023e-197
SH3TC1	2.00010956006682e-201	0.347294785733821	0.483	0.088	4.83426480668151e-197
HIPK3	3.29720322122106e-201	-0.367443463962407	0.173	0.447	7.9693401856913e-197
WDR1	3.58640170933688e-201	0.374314593049981	0.959	0.784	8.66833293146723e-197
HSPA12B	6.78557448103635e-201	-0.391400179414216	0.172	0.444	1.64007335206649e-196
SEMA3F	6.82565218990338e-201	-0.394275333511072	0.197	0.475	1.64976013429965e-196
MCAM	1.97208380294008e-200	0.424219106108759	0.717	0.323	4.76652655170617e-196
ACOT9	3.11270618985576e-199	0.377020442970819	0.645	0.241	7.52341086088136e-195
FAM49A	5.04239114299122e-199	0.28638271807426	0.4	0.029	1.21874593926098e-194
AP1B1	5.21492017918387e-199	0.336379099061886	0.534	0.13	1.26044620730874e-194
CCDC50	5.46329501956365e-199	0.409537944175368	0.917	0.636	1.32047840622853e-194
C12orf57	5.70197887265247e-199	0.380066534738459	0.968	0.82	1.3781682935201e-194
TUBB2A	1.19875723328231e-198	0.368041634599611	0.538	0.133	2.89739623284335e-194
KRAS	1.59269361944273e-198	-0.489262282828126	0.5	0.69	3.84954047819309e-194
TGFBR3	4.72437105774199e-198	-0.247178803766518	0.058	0.269	1.14188048465624e-193
KXD1	6.19665747554177e-198	0.383991254584689	0.921	0.641	1.49773211183845e-193
SPEN	8.8647058509386e-198	-0.311138688815277	0.122	0.38	2.14259940417186e-193
ZMYM4	9.93266178909406e-198	-0.373770045030455	0.191	0.464	2.40072435442403e-193
EGR1	1.53260919522983e-197	-0.510997225476052	0.198	0.478	3.7043164248705e-193
ZNF581	2.18709694407689e-197	0.47875073216309	0.817	0.477	5.28621331383384e-193
COX6B1	2.53788295663009e-197	0.283570594612287	0.999	0.979	6.13406310617492e-193
AP2M1	2.71235519119053e-196	0.322608894557156	0.992	0.92	6.55576249710751e-192
DPH3	9.39401668763945e-196	0.376374707103536	0.719	0.318	2.27053383340246e-191
SEC11C	9.91994232310772e-196	-0.467069325632887	0.451	0.666	2.39765005949514e-191
ISCA2	1.2800939685148e-195	0.333133545091281	0.603	0.184	3.09398712190028e-191
DNAJC21	1.28899721083809e-195	-0.435738687685944	0.28	0.546	3.11550625859566e-191
BHLHE40	1.59708868636973e-195	-0.424624539416292	0.215	0.489	3.86016335495563e-191
ORAI2	2.09499786461123e-195	0.371220446377838	0.672	0.26	5.06360983876533e-191
CTSZ	3.85415483231627e-195	-0.431305821457622	0.811	0.862	9.31549222970844e-191
SEC11A	5.17330482350184e-195	0.304072848039263	0.997	0.964	1.25038777584039e-190
VPS13C	6.93594620554971e-195	-0.428404784404034	0.274	0.545	1.67641819788136e-190
C5orf42	7.33695371221603e-195	-0.255012143467358	0.073	0.295	1.77334171224261e-190
ANKRD29	9.65326103722381e-195	-0.209747031228087	0.037	0.219	2.333193192697e-190
SH3GL1	1.19833374398072e-194	0.367895889994793	0.761	0.354	2.89637265920139e-190
GGH	3.77516166323161e-194	0.409696041987308	0.414	0.045	9.12456574003081e-190
WSB1	9.29663103665815e-194	-0.369452592194698	0.898	0.959	2.24699572156028e-189
DDB2	1.72268690582691e-193	0.358694923274777	0.636	0.23	4.16373425138363e-189
SUMO3	1.84230853127592e-193	0.360330790665871	0.962	0.789	4.4528597200939e-189
H2AFV	3.55620825387551e-193	0.483484626828532	0.928	0.73	8.5953553496171e-189
NRGN	3.61469438467287e-193	0.383803871954426	0.601	0.209	8.73671632775433e-189
UBE2J1	3.92899173227882e-193	0.385961085013225	0.794	0.401	9.49637301691792e-189
TPX2	6.65809898725079e-193	0.500636011003624	0.36	0.009	1.60926252521852e-188
TMED9	1.26702871664047e-192	0.381560273565274	0.975	0.864	3.06240840812e-188
GBA2	1.29630619144511e-192	0.364870838082317	0.571	0.169	3.13317206472284e-188
GRHPR	2.04078720606909e-192	0.3705162344341	0.924	0.67	4.93258267706899e-188
TMEM189	4.56657957043216e-192	0.377679394050066	0.767	0.38	1.10374228217345e-187
ENC1	5.0618152996877e-192	0.318769343775838	0.434	0.057	1.22344075793452e-187
CLIC2	1.4118353689257e-191	-0.370085552036807	0.176	0.442	3.41240608669342e-187
LYPLA2	1.73443720938992e-191	0.370720498644794	0.737	0.343	4.19213473509544e-187
NDUFV1	1.87308029186525e-191	0.382187315124733	0.86	0.545	4.52723506543831e-187
CCNB2	2.19061211650464e-191	0.532258578832557	0.355	0.006	5.29470948559172e-187
CD276	3.73989890607148e-191	0.314731494700922	0.453	0.075	9.03933565597476e-187
TAF9	4.38800232842371e-191	0.378772662620061	0.848	0.508	1.06058016278001e-186
NPC2	1.70306553677629e-190	0.381037033651784	0.99	0.917	4.11630940238829e-186
SRA1	2.3513814033032e-190	0.367124627787639	0.754	0.368	5.68328885178383e-186
CMPK1	2.45225664049468e-190	-0.444214020984707	0.622	0.763	5.92710430007565e-186
ITPA	2.52207320223947e-190	0.355260999792404	0.687	0.287	6.09585092981279e-186
PJA2	2.71136240530037e-190	-0.447035802825295	0.333	0.581	6.553362933611e-186
IER5	2.92393343878146e-190	-0.355473819255696	0.151	0.408	7.06714712153479e-186
NUSAP1	4.21957914723612e-190	0.561393812414594	0.36	0.011	1.01987227988697e-185
MANF	5.76008910945341e-190	0.455985440249522	0.874	0.607	1.39221353775489e-185
IFI27L2	8.33731969685161e-190	0.409195528781452	0.751	0.38	2.01513017072903e-185
RP11-251M1.1	1.75583870401551e-189	-0.518276660427641	0.287	0.559	4.24386214760548e-185
C2orf88	2.22125986782054e-189	-0.185945812665482	0.03	0.199	5.36878510052224e-185
MAD2L1	4.00024307333389e-189	0.412791611032788	0.359	0.011	9.668587508248e-185
GSTT2B	7.1663877968373e-189	-0.223477023326602	0.059	0.263	1.73211593049558e-184
PIBF1	1.54499479264351e-188	-0.319830362467227	0.131	0.381	3.73425241381937e-184
YIF1A	1.70154018979814e-188	0.381177932684404	0.917	0.682	4.11262263874211e-184
KCNN3	1.74764158854262e-188	-0.280695378618043	0.09	0.324	4.2240497195075e-184
SLC7A11	1.82981580676632e-188	0.31680364547262	0.343	0.001	4.42266480495419e-184
SMDT1	1.85459843921882e-188	-0.364654917307378	0.951	0.948	4.48256442759189e-184
SECISBP2L	2.19738497736819e-188	-0.372384642793391	0.183	0.446	5.31107949029891e-184
GTF3C6	3.47033979102078e-188	0.392962353990193	0.901	0.626	8.38781127489722e-184
STRAP	3.91382425652509e-188	0.366519978687404	0.929	0.687	9.45971322802113e-184
AGRN	9.25389039864921e-188	-0.458053085073334	0.393	0.635	2.23666530935351e-183
ARF4	1.53421367427125e-187	0.404825505197704	0.921	0.708	3.70819445071362e-183
PDGFB	4.33334766009359e-187	0.363434160587622	0.5	0.119	1.04737012944462e-182
TSPAN13	5.75066301039055e-187	0.312414721843651	0.353	0.008	1.3899352496114e-182
TMEM59	7.5663110288496e-187	-0.3956936212051	0.896	0.939	1.82877737567295e-182
AHCY	9.14854217702692e-187	0.358671118845177	0.723	0.326	2.21120264418741e-182
CDC42EP1	1.42737169224332e-186	0.399202312731181	0.868	0.533	3.4499573801521e-182
NFE2L2	1.56047687048088e-186	-0.458046366838189	0.543	0.706	3.77167259595229e-182
ERP29	1.59919430450188e-186	-0.35814992369776	0.934	0.957	3.86525263398105e-182
NFIX	2.56892293451361e-186	-0.365899512685232	0.184	0.449	6.20908673271939e-182
SNRPA1	3.25893534951674e-186	0.432133329659394	0.687	0.326	7.87684673978196e-182
PNISR	3.46102852347454e-186	-0.398597231840743	0.847	0.877	8.36530594123797e-182
ZNF423	3.99662034302557e-186	-0.240354279541502	0.067	0.28	9.6598313690928e-182
TNFRSF10B	5.92836796447413e-186	0.345728942104465	0.636	0.227	1.4328865370134e-181
PTRH1	6.27958246455024e-186	0.356722479435475	0.693	0.29	1.51777508168179e-181
PSMA5	1.26246041724251e-185	0.392275341464664	0.86	0.575	3.05136682847515e-181
SNHG8	1.89645838465554e-185	-0.393329506014662	0.913	0.941	4.58373991571244e-181
AURKB	3.38018310666934e-185	0.573992414388857	0.349	0.008	8.16990256881979e-181
ADAMTS9-AS1	5.66782224358961e-185	-0.117342114460047	0.006	0.115	1.36991263627561e-180
SAMD11	5.74572984897854e-185	-0.192226492553335	0.029	0.194	1.38874290449811e-180
HSPE1	7.80762718016538e-185	0.47448561258251	0.958	0.869	1.88710348944597e-180
PTRF	1.91903542293229e-184	-0.279941911261251	0.999	0.999	4.63830861722734e-180
CD320	2.41582183756211e-184	0.394930644105591	0.882	0.624	5.83904138138762e-180
TMEM70	2.63968199059326e-184	0.38543106123911	0.699	0.31	6.3801113712639e-180
RP5-855D21.1	4.19964269391094e-184	-0.124255702121489	0.012	0.141	1.01505363911827e-179
TMEM208	5.19278520101529e-184	0.362586238356764	0.774	0.4	1.2550961830854e-179
TMEM258	6.21756445520755e-184	-0.295588920041611	0.993	0.993	1.50278532882366e-179
TMED3	6.59177054927062e-184	0.366111708363106	0.936	0.727	1.59323094175871e-179
YKT6	6.89253886677402e-184	0.330722480481625	0.603	0.202	1.66592664409928e-179
SF3B5	8.13421706672293e-184	0.307499127078929	0.992	0.926	1.96604026502693e-179
PSMD13	8.23738534624872e-184	0.38457529655412	0.865	0.561	1.99097603818832e-179
CALML4	1.52488358156802e-183	-0.141271699896913	0.014	0.146	3.68564361664992e-179
RP11-736K20.5	1.65746167591499e-183	0.301806848614342	0.467	0.087	4.00608487068653e-179
POF1B	1.70941518356101e-183	-0.117915303734298	0.007	0.117	4.13165649866697e-179
RNASET2	2.54313834352502e-183	-0.384908052829094	0.227	0.488	6.14676537629997e-179
SETD2	2.64328989506979e-183	-0.355137247222579	0.188	0.452	6.38883167638369e-179
FAT4	3.7749900985147e-183	-0.244572388270431	0.064	0.272	9.12415106811002e-179
MEGF6	1.80059027851997e-182	-0.375839117724216	0.198	0.461	4.35202670318276e-178
MTHFD2	2.91460402826576e-182	0.352191319241548	0.548	0.161	7.04459793631834e-178
LMO4	3.39513091525654e-182	-0.479517121340198	0.441	0.652	8.20603142217505e-178
NMB	4.688481783079e-182	0.361278303402751	0.631	0.236	1.13320604697019e-177
RP11-322E11.5	6.36289630312507e-182	0.317491090831162	0.383	0.033	1.53791203646533e-177
TROVE2	3.52250139886045e-181	-0.441298227078716	0.452	0.66	8.51388588104571e-177
DNASE1L1	4.73960713961865e-181	-0.456336461950121	0.439	0.651	1.14556304564583e-176
LYSMD2	5.2031234521893e-181	-0.285164504976756	0.111	0.351	1.25759493839415e-176
LUC7L3	5.41474103748567e-181	-0.418097925167254	0.812	0.869	1.30874290876029e-176
GAL	6.7114208742034e-181	0.333889606878056	0.337	0.003	1.62215042529496e-176
CENPM	1.57841828942292e-180	0.337432503937804	0.339	0.005	3.81503700553521e-176
PEA15	3.65659534534517e-180	-0.433688038303135	0.736	0.824	8.83799094969926e-176
MRPS11	3.81659856314131e-180	0.361987063103102	0.872	0.562	9.22471872711256e-176
UBE2T	1.3330535293878e-179	0.479336598250512	0.393	0.047	3.22199038053031e-175
HSD17B11	1.96673270982089e-179	-0.453964551057649	0.466	0.676	4.75359295963709e-175
MRPL47	3.28685988003881e-179	0.374722389342623	0.805	0.462	7.9443403300538e-175
KRT8	4.81155483360873e-179	0.367336120448177	0.801	0.427	1.16295280328323e-174
SLC16A3	8.3299608728734e-179	0.409169686307166	0.806	0.466	2.0133515429735e-174
TRABD	9.66371237453381e-179	0.324442597115017	0.649	0.251	2.33571928092482e-174
PDGFD	1.01257074941521e-178	-0.19262904817041	0.035	0.205	2.44738350133657e-174
FAM189A1	1.1551971210692e-178	-0.10640782023272	0.006	0.112	2.79211144162426e-174
CDC42EP3	1.15764941337292e-178	-0.501319501182108	0.65	0.785	2.79803863212234e-174
CUEDC2	1.74145622385006e-178	0.362599915890328	0.884	0.606	4.20909969304559e-174
ANKRD12	1.78274785551351e-178	-0.444376790087168	0.513	0.691	4.30890156677616e-174
UGP2	1.78971492316365e-178	-0.442992551208987	0.591	0.744	4.32574096928655e-174
MRPS16	3.89031917212633e-178	0.356113482115064	0.912	0.654	9.40290143902935e-174
THRB	4.20011867673457e-178	-0.108672874871108	0.007	0.117	1.01516868416674e-173
NINJ1	5.61453591064793e-178	0.419405669028344	0.775	0.419	1.3570333296036e-173
PSMA3	5.97709137234986e-178	0.421373618596961	0.902	0.703	1.44466298469696e-173
C16orf45	6.2802222648476e-178	-0.416109034764413	0.336	0.585	1.51792972141366e-173
SPAG9	8.31650049667779e-178	-0.429812325989714	0.381	0.616	2.01009817004702e-173
CREBRF	9.1172154802923e-178	-0.270138008088734	0.095	0.326	2.20363098158665e-173
TRAF7	2.25476205114696e-177	0.362349063953024	0.815	0.449	5.44975987762221e-173
DBN1	4.10567385712844e-177	0.358726390580938	0.785	0.419	9.92341371267944e-173
CASP8AP2	5.24751071478576e-177	-0.316197116239518	0.126	0.366	1.26832333976372e-172
ARRDC3	5.70450150237146e-177	-0.307603012036746	0.101	0.33	1.37877801312318e-172
NUDT3	7.70710905535351e-177	-0.44762632011502	0.634	0.747	1.86280825867894e-172
C11orf31	8.02583565775858e-177	0.331460135500321	0.983	0.874	1.93984447848025e-172
IPO11	9.34105469406441e-177	0.354802783699399	0.716	0.322	2.25773291955537e-172
SNRPA	1.77309343966388e-176	0.378261905136726	0.812	0.463	4.28556684366761e-172
GSTM4	5.76128526489721e-176	-0.229875748776665	0.06	0.257	1.39250264852565e-171
APLN	6.48153298991742e-176	0.435792608256793	0.326	0.001	1.56658652366304e-171
MSANTD3	8.74206336674506e-176	0.29128269654405	0.517	0.136	2.11295671574228e-171
DBNDD1	4.25711758908056e-175	0.261322851139815	0.359	0.022	1.02894532128077e-170
IGF1R	4.41457508901806e-175	-0.400662389871318	0.233	0.49	1.06700279901566e-170
ZDHHC24	5.37733971181266e-175	0.358430285905937	0.774	0.409	1.29970300834512e-170
EPHX2	7.32935894293745e-175	-0.162275611565831	0.019	0.159	1.77150605650798e-170
APOL1	8.304132203454e-175	-0.339872640405646	0.168	0.421	2.00710875357483e-170
CYP2U1	8.60467140211706e-175	-0.186662154402317	0.031	0.191	2.07974907789169e-170
SSNA1	1.265306762083e-174	0.36084654007022	0.903	0.651	3.0582464439546e-170
PCBD1	1.38792605823223e-174	0.343006976071967	0.968	0.812	3.35461728274729e-170
DMD	2.25279814711772e-174	-0.189670486246787	0.039	0.212	5.44501312158352e-170
VIM	7.16598691524362e-174	0.251600412456027	1	1	1.73201903741438e-169
SLC35B2	7.28640435703925e-174	0.273704060885082	0.464	0.095	1.76112393309639e-169
PDCD4	7.76445873782686e-174	-0.450748643917883	0.361	0.601	1.87666967693275e-169
NRP2	3.44377003987966e-173	0.359010209643155	0.615	0.231	8.32359218638913e-169
TUFM	5.15804883630112e-173	0.344711481075866	0.966	0.826	1.24670040373398e-168
STXBP3	7.07221074914565e-173	-0.353205322591685	0.192	0.442	1.7093533380685e-168
CXCL12	1.58167330785287e-172	-0.161054068996921	0.022	0.166	3.82290438508039e-168
CENPA	1.61488191039335e-172	0.47736866639663	0.324	0.003	3.90316957742073e-168
TCN2	3.94023273890174e-172	-0.445189872486376	0.504	0.7	9.52354252992551e-168
CCNA2	4.0137979253369e-172	0.425954013978016	0.324	0.003	9.70134958553928e-168
PSMD14	4.2954551555148e-172	0.406004216404199	0.72	0.374	1.03821151108793e-167
RP3-510D11.2	6.70256230127803e-172	0.272216057077446	0.321	0.001	1.6200093082189e-167
SPEG	9.01396049658033e-172	-0.148276874381446	0.023	0.17	2.17867425202347e-167
NAP1L1	9.63633966869548e-172	0.265967975506243	0.999	0.997	2.3291032979237e-167
CAPZA1	1.02340863600372e-171	0.391196265983323	0.817	0.463	2.473578673221e-167
THOP1	1.44866691151684e-171	0.285736371536316	0.454	0.09	3.5014279251362e-167
MCL1	1.66867546652334e-171	-0.429893799844574	0.765	0.828	4.03318860258692e-167
PSMD3	1.97891681204383e-171	0.346198333149113	0.711	0.328	4.78304193470993e-167
PRC1	2.40293629433979e-171	0.457867992683777	0.36	0.03	5.80789702341928e-167
ZNF397	3.5630225396453e-171	-0.219069105656471	0.051	0.238	8.6118254783227e-167
ADAMTS9	4.6739369438866e-171	0.318226561181268	0.402	0.057	1.12969055933739e-166
GARS	4.69937876342118e-171	0.359488354226175	0.67	0.296	1.1358398471189e-166
PDAP1	6.68086450092066e-171	0.357766653698945	0.925	0.702	1.61476494987252e-166
CAV2	7.59770991719332e-171	0.38982035131899	0.949	0.78	1.83636648698563e-166
PFKP	7.6971406721031e-171	0.377855743640667	0.793	0.458	1.86039890044732e-166
ZSCAN18	8.30425765522426e-171	-0.340793992143664	0.157	0.403	2.0071390752677e-166
PHLDA3	1.64053092841079e-170	0.30441733479984	0.499	0.127	3.96516325396887e-166
GBE1	1.65471247042102e-170	0.298471254983554	0.451	0.087	3.9994400410076e-166
PLK1	2.28204415764551e-170	0.544250705425668	0.334	0.012	5.5157007290292e-166
MLST8	2.35347867581295e-170	0.318915422315048	0.662	0.274	5.6883579594399e-166
AMDHD2	3.00746661079179e-170	0.268636843567982	0.421	0.066	7.26904679828375e-166
FAM84B	4.67324442829077e-170	-0.36155996500245	0.19	0.444	1.12952317831788e-165
MKI67	1.04439671219687e-169	0.534536563506503	0.339	0.016	2.52430685337984e-165
SRP19	1.34408277796616e-169	0.350385350041297	0.801	0.452	3.2486480743442e-165
DPP7	1.5743568854748e-169	0.364295635653635	0.847	0.537	3.80522059219259e-165
GTF3A	3.43098677022928e-169	0.363086075518813	0.916	0.666	8.29269502364416e-165
CDH5	3.78720724316837e-169	0.394933964089666	0.95	0.772	9.15367990673796e-165
SLC38A1	5.13213948752962e-169	0.26225342197624	0.334	0.011	1.24043811413591e-164
CENPK	5.44530820943596e-169	0.330100067291681	0.354	0.026	1.31613099422067e-164
HMGB1	7.95069553648134e-169	0.609301696323276	0.998	0.989	1.92168311116754e-164
STARD3NL	1.46581973030302e-168	0.328108165833677	0.743	0.354	3.54288628814239e-164
IDH3G	2.0021759692823e-168	0.348601387514467	0.779	0.412	4.83925931775531e-164
FKBP1C	2.22637749282602e-168	-0.165252926266556	0.029	0.184	5.38115440016048e-164
LINC01235	2.65107651827106e-168	0.400434415909678	0.314	0.001	6.40765194466114e-164
ZFC3H1	4.36140009496301e-168	-0.333904721229021	0.169	0.415	1.05415040295256e-163
COTL1	4.66094457463824e-168	0.33376247884335	0.575	0.195	1.12655030369006e-163
TANC2	4.68617249743199e-168	-0.365859333059379	0.182	0.429	1.13264789262931e-163
HSP90AB1	6.44696053133671e-168	-0.256223077686958	0.998	0.999	1.55823036042408e-163
PCDH17	7.29379121256971e-168	-0.239990271661924	0.058	0.248	1.7629093360781e-163
ZWINT	1.00862032120404e-167	0.38593740951786	0.352	0.026	2.43783531635016e-163
CLTB	1.05341646949127e-167	-0.397195019222779	0.708	0.793	2.5461076067604e-163
TSTA3	1.31248126413418e-167	0.352353060137921	0.802	0.456	3.17226721541232e-163
DAB2	2.55530479353351e-167	0.373015423708033	0.811	0.47	6.17617168597049e-163
COA4	4.03519890103205e-167	0.374838808678486	0.859	0.567	9.75307574379446e-163
PCDH10	4.14934361957918e-167	0.266616477128545	0.341	0.018	1.00289635285229e-162
NAV1	4.62960615655408e-167	0.286129519575199	0.433	0.08	1.11897580803912e-162
SDF4	8.59620672888638e-167	-0.402435835766196	0.685	0.782	2.07770316637184e-162
CPNE3	1.60496688182224e-166	-0.429800714280546	0.446	0.645	3.87920495336435e-162
CD46	1.63479569989674e-166	-0.44187334021346	0.46	0.654	3.95130120665041e-162
TCEAL4	1.90532099204695e-166	-0.367772581858786	0.886	0.908	4.60516083777749e-162
KPNA2	3.59720501908559e-166	0.635867171525021	0.836	0.548	8.69444453112986e-162
TIMM22	3.60957037331095e-166	0.326429187457337	0.698	0.324	8.72433159229257e-162
CERS6	3.7018885080674e-166	-0.282810844668481	0.102	0.322	8.94746452399891e-162
TRMT112	3.84107920057514e-166	0.283771462054936	0.993	0.943	9.2838884277901e-162
C8orf59	4.08279607831046e-166	-0.36547670574171	0.886	0.901	9.86811812127638e-162
CPAMD8	4.21925851307476e-166	-0.211792460784043	0.049	0.229	1.01979478261017e-161
THAP11	4.35310071393904e-166	-0.327302914954084	0.177	0.423	1.05214444255906e-161
ACP1	4.36653281527219e-166	0.326056694270452	0.945	0.729	1.05539098145129e-161
PTPRA	4.75796883709925e-166	-0.384297438037351	0.257	0.504	1.15000106792689e-161
CCDC68	7.45692476336796e-166	-0.262257515092857	0.063	0.256	1.80233871530604e-161
CCDC86	8.23956764834559e-166	0.291477562949894	0.473	0.109	1.99150350060513e-161
KIAA1161	1.57679322652064e-165	-0.197500528873018	0.044	0.217	3.81110922850039e-161
SNRPD3	5.13456405906549e-165	0.357340248929017	0.93	0.724	1.24102413307613e-160
GLMP	5.65980004285447e-165	0.339376743599282	0.678	0.307	1.36797367035793e-160
GMPPB	6.26391311774105e-165	0.291713176775758	0.508	0.138	1.51398780055801e-160
TXNL1	6.91453053696271e-165	0.360194929226852	0.894	0.607	1.67124203078389e-160
ENDOD1	1.40202413292103e-164	-0.317701938089446	0.152	0.394	3.38869232927013e-160
UBE2Q2	2.25196576598203e-164	-0.381475659601195	0.27	0.515	5.44300125637856e-160
CENPF	3.16489019608297e-164	0.547700234376661	0.336	0.02	7.64953960393254e-160
IL18R1	3.33470166264989e-164	-0.190671584473951	0.036	0.197	8.05997391862479e-160
ZMIZ1	5.83804011032513e-164	-0.354747854913629	0.208	0.453	1.41105429466558e-159
HAPLN1	6.81287456118237e-164	-0.128798528371818	0.006	0.104	1.64667178143778e-159
CTB-50L17.10	7.21570645131404e-164	0.305903995480472	0.613	0.233	1.7440362492826e-159
ARHGAP22	8.91746873535105e-164	0.256024645617472	0.317	0.005	2.15535219333435e-159
TBCA	9.51465823057571e-164	0.278008644203714	0.994	0.931	2.29969289433015e-159
STX1A	1.00070041862636e-163	0.246309890647376	0.335	0.016	2.41869291181992e-159
CIB1	1.68858777833152e-163	0.346185475350394	0.926	0.708	4.08131666022729e-159
HAGHL	2.32642864092204e-163	0.251392450845768	0.322	0.009	5.62297802510856e-159
HLA-DMA	2.46296864755096e-163	-0.186146889611376	0.037	0.201	5.95299522113067e-159
EFNB1	2.89451964075622e-163	0.266755647721416	0.332	0.016	6.99605397170778e-159
PPP1R13L	5.1591386199549e-163	-0.359199806573671	0.201	0.447	1.2469638044431e-158
EEF1E1	5.74682298129692e-163	0.374658517577981	0.751	0.407	1.38900711457947e-158
ZFP14	6.609670754995e-163	-0.167927407374531	0.033	0.191	1.59755742148229e-158
TCEB1	1.45893147380699e-162	0.321405897916322	0.968	0.87	3.52623737219149e-158
JOSD2	2.53747627783161e-162	0.340250282064976	0.834	0.492	6.133080163519e-158
AK1	3.85384032519643e-162	0.34594697333135	0.955	0.782	9.31473206599976e-158
VDAC2	6.4629793051635e-162	0.279568777443991	0.992	0.938	1.56210209805802e-157
SPOCK1	7.91708093160569e-162	-0.43747663014306	0.566	0.743	1.91355846116909e-157
RBM43	8.71744945326273e-162	-0.228494018777454	0.068	0.263	2.1070075328536e-157
ITGA5	1.51239853416087e-161	0.392859238971501	0.948	0.784	3.65546725706682e-157
POLR2F	1.8094818921286e-161	0.336444244231735	0.955	0.81	4.37351773327483e-157
SENP7	2.07510091253769e-161	-0.230666861181527	0.062	0.252	5.01551890560359e-157
FIS1	3.91845482054491e-161	0.277164746097518	0.991	0.945	9.47090530125705e-157
CDKN2D	8.64847107009748e-161	-0.339813778790411	0.197	0.445	2.09033545764256e-156
FASN	9.81096534643889e-161	0.27214412734967	0.416	0.074	2.37131032423428e-156
ANKRD36B	1.3538322500435e-160	-0.186263326058304	0.039	0.202	3.27221254835514e-156
CEP350	2.33826241903254e-160	-0.325573611987958	0.178	0.42	5.65158026680165e-156
ARHGAP18	4.53771287869237e-160	0.375370259705363	0.59	0.224	1.09676520277995e-155
NES	5.63005183062658e-160	0.334820050050313	0.608	0.231	1.36078352746244e-155
DDX3Y	6.66804027329403e-160	0.230583526690331	0.301	0	1.61166533405517e-155
CISD3	1.05801590126304e-159	0.343993124969225	0.741	0.391	2.55722443335277e-155
CAP1	1.18757787160874e-159	0.360263026182405	0.906	0.679	2.87037571567831e-155
CD59	1.19939226772207e-159	0.49925030433652	0.998	0.992	2.89893111108424e-155
TM4SF1	1.30435548016655e-159	0.364776676189453	0.999	0.984	3.15262719556254e-155
ARHGAP24	2.16383511072992e-159	0.25643256685211	0.33	0.018	5.22998946263421e-155
BOLA3	2.17079312031399e-159	0.385520334340048	0.775	0.455	5.24680697179892e-155
ABHD17A	2.34790451787144e-159	0.357001418767791	0.778	0.433	5.67488521969527e-155
KNSTRN	2.59000209019687e-159	0.338338140920191	0.347	0.031	6.26003505200584e-155
TFPT	2.89509927106537e-159	0.333008490972147	0.677	0.308	6.99745493816501e-155
PPCS	2.93567768062959e-159	-0.400171474965904	0.496	0.677	7.09553295408171e-155
COPS6	3.72976714822239e-159	0.363794243113087	0.922	0.731	9.01484719725351e-155
POP7	4.73931975749955e-159	0.383251833241483	0.754	0.425	1.14549358538764e-154
DUSP23	5.76493150961902e-159	-0.476000094922976	0.826	0.87	1.39338394587492e-154
RUVBL2	6.33154088628588e-159	0.355232898374171	0.727	0.382	1.5303334322153e-154
WWP1	6.50342217067551e-159	-0.350097228709137	0.196	0.438	1.57187713865227e-154
ARHGAP44	7.57260465995841e-159	-0.126394591476073	0.014	0.134	1.83029854631195e-154
PTP4A2	1.35330005572015e-158	-0.40915383974797	0.648	0.76	3.2709262346756e-154
SNU13	1.47104793329892e-158	0.273001049095553	0.993	0.953	3.55552285478348e-154
CHD1	1.63562931754054e-158	-0.367439156999416	0.253	0.495	3.9533160604955e-154
SCO2	2.64122301695835e-158	0.320112715576328	0.667	0.294	6.38383603198833e-154
XPA	2.68068859297522e-158	-0.39560488924449	0.318	0.552	6.47922432922111e-154
MYO10	2.73991058237183e-158	0.335598327617251	0.714	0.342	6.62236387759272e-154
COBLL1	2.79839432224338e-158	-0.285887995350869	0.111	0.331	6.76371907686224e-154
FLI1	3.81131508751648e-158	-0.425906460019851	0.563	0.71	9.21194856652733e-154
RFK	6.24132037835707e-158	-0.447750987901364	0.728	0.794	1.5085271354489e-153
NOX4	7.66222789165164e-158	0.265176384593763	0.396	0.061	1.8519604814122e-153
CENPC	7.88578331807825e-158	-0.322748871526514	0.164	0.402	1.90599382797951e-153
HAGLROS	9.83620845624966e-158	0.264174692274401	0.351	0.033	2.37741158387554e-153
ITSN1	1.0673076893929e-157	-0.395299409918594	0.293	0.531	2.57968268526264e-153
APH1B	1.90318122824738e-157	0.272296304785587	0.419	0.079	4.59998902867391e-153
NEK7	2.33569954668748e-157	-0.319478591343476	0.151	0.386	5.64538580434365e-153
TNFAIP8L3	2.39103441503376e-157	0.236454938316276	0.297	0	5.77913018113661e-153
GRPEL1	3.61803576803724e-157	0.342182520226002	0.743	0.396	8.74479245134601e-153
SQLE	4.73251130705339e-157	0.346974227282038	0.463	0.122	1.1438479829148e-152
RNPC3	5.90503415668631e-157	-0.24460567096041	0.076	0.274	1.42724675567108e-152
PBK	6.95661451734655e-157	0.353114280708409	0.303	0.004	1.68141372884266e-152
ZNF37A	1.24337326262115e-156	-0.289527302752517	0.128	0.355	3.00523317575532e-152
YPEL3	1.83610818656384e-156	-0.40324913725071	0.603	0.754	4.43787348692481e-152
GEMIN7	3.04460201086507e-156	0.314364544377947	0.691	0.319	7.35880306026087e-152
EPB41L1	3.09419570203733e-156	-0.227273947081314	0.065	0.253	7.47867101182423e-152
ADGRL3	4.23665114975513e-156	-0.101511403364466	0.008	0.11	1.02399858289581e-151
FOXM1	5.0243830301647e-156	0.309852021480715	0.304	0.005	1.21439337839081e-151
CADPS2	5.54394969269688e-156	-0.278460921293296	0.109	0.326	1.33997264072484e-151
TOP2A	5.56048831823545e-156	0.624228408408888	0.317	0.016	1.34397002651751e-151
LARP6	6.5272843336426e-156	0.337663756361808	0.757	0.405	1.57764462344142e-151
TOMM22	7.34010849818092e-156	0.31633786890566	0.954	0.765	1.77410422401033e-151
OTUD1	1.41438188531705e-155	-0.156898593805709	0.027	0.171	3.4185610168113e-151
TINAGL1	1.61423227593497e-155	0.418384738639542	0.861	0.586	3.90159941093483e-151
SCN8A	2.22645733426086e-155	-0.159883034767138	0.025	0.165	5.38134737690849e-151
AKAP9	3.17401003247076e-155	-0.42883902241012	0.485	0.658	7.67158224848182e-151
NDUFB8	3.37925885549994e-155	0.300676941563718	0.98	0.901	8.16766865374335e-151
THOC3	4.64574285325862e-155	0.270885039661022	0.472	0.122	1.12287604763261e-150
RNASEH2A	5.18096449483471e-155	0.334872386131145	0.518	0.171	1.25223911840155e-150
LSM2	7.17279803026929e-155	0.332636114724095	0.952	0.785	1.73366528391609e-150
HMBOX1	1.04520767759061e-154	-0.358579335721036	0.2	0.439	2.52626695673651e-150
CCL28	2.66124317240188e-154	-0.163248388946264	0.031	0.18	6.43222474769534e-150
ANO2	6.34418430262143e-154	-0.16621451612422	0.035	0.189	1.5333893459436e-149
RNASEH1	1.50534102904809e-153	0.3043736566469	0.625	0.26	3.63840926720924e-149
MRPS2	1.62804142836952e-153	0.320058246815773	0.773	0.419	3.93497613236913e-149
PKN2	1.86469646577037e-153	-0.37486789843898	0.288	0.52	4.50697135776698e-149
TMEM132A	2.13736536085737e-153	0.263402111723518	0.423	0.085	5.16601207719226e-149
SSR2	2.45091071492875e-153	0.287074506323918	0.99	0.936	5.92385119798279e-149
SERTAD1	3.77433568085877e-153	0.39060148603615	0.81	0.498	9.12256934063565e-149
NR2F2-AS1	3.84255731700985e-153	-0.299073082410382	0.132	0.359	9.28746103521281e-149
XPNPEP1	4.13557815585772e-153	0.27264872877024	0.522	0.157	9.9956924027081e-149
BST2	5.12741398087312e-153	-0.29265394394776	0.931	0.994	1.23929595917703e-148
ANPEP	5.13543735150989e-153	0.282011629858236	0.409	0.079	1.24123520785994e-148
LSP1	5.73573792220578e-153	-0.122533423319209	0.014	0.129	1.38632785579714e-148
CTNNAL1	9.67334997808989e-153	-0.383965440893538	0.791	0.869	2.33804868970433e-148
TMEM256	1.64680672387015e-152	0.343841092343225	0.93	0.704	3.98033185159415e-148
LRRCC1	2.21401267699425e-152	-0.205981973592406	0.052	0.226	5.35126864029511e-148
UBN2	2.99841974669959e-152	-0.186785765370355	0.046	0.214	7.24718052777292e-148
CKS1B	3.17040198698939e-152	0.858958476883617	0.722	0.485	7.66286160255337e-148
VCP	3.95239707581226e-152	0.352611881317886	0.875	0.614	9.55294373223824e-148
PPP1R18	5.23469807137992e-152	0.326691023872351	0.79	0.441	1.26522652385253e-147
UBE2D2	8.94199467805106e-152	0.2858369153615	0.985	0.9	2.16128011368494e-147
EPAS1	9.21001282071019e-152	-0.369224735977564	0.836	0.872	2.22606009876565e-147
LINC00607	1.21200688209285e-151	0.309140091803292	0.533	0.178	2.92942063401841e-147
EEF2	1.45610672881532e-151	-0.224564681599148	1	1	3.51940996354663e-147
ATF5	2.56725214550045e-151	0.282532829251797	0.52	0.165	6.20504843567458e-147
SLC16A2	5.16088265237636e-151	-0.172432480803304	0.034	0.184	1.24738533707937e-146
UCHL3	7.79293454442786e-151	0.320232461996717	0.64	0.284	1.88355227938821e-146
BTBD7	1.03109028067186e-150	-0.404408785939272	0.368	0.577	2.49214520838388e-146
PRPF4B	1.06530878010439e-150	-0.400956852498779	0.389	0.596	2.57485132151232e-146
CLIC4	1.15050487468168e-150	0.360044751645989	0.839	0.537	2.78077028210563e-146
MFSD3	1.51165847903331e-150	0.238961780738195	0.37	0.052	3.65367854382352e-146
MPDU1	1.72205985787083e-150	0.279708213985256	0.567	0.205	4.16221867647379e-146
EI24	1.72679786085707e-150	0.326783544528372	0.939	0.778	4.17367042969154e-146
CLK1	1.80343049506397e-150	-0.303790691906317	0.147	0.376	4.35889150656961e-146
SPRY1	1.82511520189529e-150	-0.193853856093954	0.038	0.195	4.41130344298092e-146
NDUFAF3	1.95902808402196e-150	0.306332293593698	0.949	0.783	4.73497087908107e-146
NUDT21	2.1361669370338e-150	0.315496651484576	0.753	0.398	5.1631154868107e-146
PLIN3	2.47951179349119e-150	0.306551960548136	0.648	0.285	5.99298000486821e-146
ATP5D	2.76098357108305e-150	-0.291541859581691	0.979	0.973	6.67329729130772e-146
CEBPZ	4.44139053398103e-150	-0.386532344839785	0.323	0.545	1.07348409206321e-145
ZBTB16	4.71490000590252e-150	-0.275391028510422	0.11	0.326	1.13959133142664e-145
GLTSCR2	5.66263408628383e-150	-0.260920798609913	0.998	0.997	1.3686586586548e-145
PRICKLE1	6.22148436808789e-150	-0.391763967904843	0.252	0.488	1.50373277176684e-145
PAXBP1	1.00686270211839e-149	-0.207046766757653	0.063	0.247	2.43358715102015e-145
XAF1	1.06167524308823e-149	-0.375498243986613	0.29	0.529	2.56606906254424e-145
ATP2B1	1.21636009663969e-149	-0.389230687621383	0.261	0.492	2.93994235357812e-145
H2AFJ	1.48825847456511e-149	0.353660362795993	0.937	0.738	3.59712073302387e-145
CAMK1	1.83394002132552e-149	0.297390795191258	0.59	0.233	4.43263303154378e-145
SMARCA4	2.05809012128401e-149	0.315169502098238	0.743	0.39	4.97440382314346e-145
ARHGEF10	2.40662061044814e-149	-0.34981615631391	0.222	0.459	5.81680201545317e-145
YWHAZ	2.58325332041075e-149	0.324927561940079	0.951	0.767	6.24372327543278e-145
NFKBIA	3.10190297371113e-149	-0.438559972143923	0.892	0.92	7.49729948745981e-145
WHAMM	4.03360429154221e-149	-0.216970178616408	0.075	0.267	9.74922157265752e-145
COMTD1	5.03510798526999e-149	0.247979136639939	0.416	0.084	1.21698560003976e-144
KRTCAP2	7.12711703232438e-149	-0.365566425451214	0.803	0.854	1.7226241867128e-144
PIK3C2A	8.87532753072617e-149	-0.386359773022502	0.337	0.554	2.14516666417651e-144
GTF2I	9.12847363843436e-149	-0.389187146807318	0.651	0.754	2.20635207840959e-144
MED28	1.1301188574735e-148	0.316639070531815	0.888	0.6	2.73149727851346e-144
GTSE1	2.00396030018934e-148	0.382678802298429	0.295	0.008	4.84357204555764e-144
FSD1	2.90833376420366e-148	0.217377813824986	0.291	0.004	7.02944270808025e-144
BCL6B	3.51384273821224e-148	0.328076034461544	0.622	0.261	8.49295789825898e-144
PLEKHA4	3.67139961772558e-148	-0.305530774316374	0.142	0.369	8.87377287604273e-144
ACVRL1	4.54011728591621e-148	-0.353190788500635	0.878	0.89	1.09734634800595e-143
P4HA2	4.76339398262111e-148	0.260237538720688	0.425	0.091	1.15131232559952e-143
TMEM54	4.87747669665731e-148	0.301726580015831	0.612	0.248	1.17888611758207e-143
SLC52A2	5.54389513470802e-148	0.278909552751524	0.59	0.227	1.33995945405893e-143
MRPS6	8.62874252859977e-148	0.326751246722427	0.754	0.407	2.08556706916256e-143
FEZ2	1.00179372246462e-147	0.343753997848459	0.894	0.644	2.421335427197e-143
PPIB	1.01815068142362e-147	0.33109036461536	0.993	0.959	2.46087019700089e-143
PFDN6	1.42008311238475e-147	0.310121237061719	0.683	0.326	3.43234088263395e-143
PTEN	1.57237097369547e-147	-0.395804884853428	0.334	0.548	3.80042064342194e-143
TRAP1	2.62243462900806e-147	0.304843007442868	0.619	0.259	6.33842449831247e-143
SNHG25	2.68864320820033e-147	0.279927003095146	0.463	0.123	6.49845063422019e-143
PTGES2	2.80014747630385e-147	0.288475069809679	0.632	0.272	6.76795645022642e-143
IRF2	2.86072701425865e-147	-0.336913453957245	0.2	0.431	6.91437719346316e-143
TMEM173	3.21860240332104e-147	-0.402759552314122	0.637	0.755	7.77936200882696e-143
MN1	3.41247009769631e-147	-0.22385885576624	0.075	0.267	8.24794022613199e-143
SMAD9	3.90633884338085e-147	-0.306051567067308	0.161	0.39	9.44162098445151e-143
CD55	5.77059266590878e-147	0.364942129269623	0.761	0.434	1.39475224735015e-142
ITGA2	7.85822492695204e-147	0.30057884838508	0.51	0.165	1.89933296484431e-142
ZBED3	7.91039745412008e-147	-0.253743422293187	0.11	0.321	1.91194306466082e-142
TSC22D1	1.50231921772738e-146	-0.522001897775534	0.455	0.633	3.63110554924707e-142
SYCE1L	1.69645924173447e-146	0.270026978184909	0.471	0.127	4.10034198727222e-142
TGFBR2	1.7274022062672e-146	0.359589610465416	0.798	0.474	4.17513113254783e-142
TFEB	2.20645663043358e-146	-0.179591213386961	0.047	0.211	5.33300567575797e-142
BNIP3L	3.21652956385232e-146	-0.348116220452291	0.883	0.9	7.77435195583107e-142
NELFE	3.49317792718392e-146	0.31723384994831	0.846	0.538	8.44301105000353e-142
SNX18	4.02510533552418e-146	-0.312841389112984	0.159	0.386	9.72867959596195e-142
PGK1	7.41112390760287e-146	0.390882162187904	0.944	0.806	1.79126864846761e-141
CUX1	7.68922438144228e-146	-0.364297330467877	0.282	0.514	1.8584855329946e-141
TUSC2	2.04720561503529e-145	0.338231589447804	0.864	0.578	4.9480959715403e-141
KHDRBS1	2.35014699606726e-145	-0.373475737062028	0.727	0.8	5.68030528949456e-141
ZNF506	2.44421836369535e-145	-0.189741124754837	0.047	0.211	5.90767578505166e-141
TROAP	2.84882018700553e-145	0.299896771184475	0.284	0.003	6.88559839199237e-141
RNF181	2.95214216814765e-145	0.31046597657307	0.978	0.867	7.13532762041288e-141
KAT6A	3.01729206420739e-145	-0.304247386701792	0.168	0.396	7.29279491918925e-141
UBE2E2	4.39667756234119e-145	0.241789847222401	0.434	0.1	1.06267696681787e-140
SNRPF	5.14698431603825e-145	0.33450283489554	0.962	0.855	1.24402610918644e-140
SWAP70	5.26831847521479e-145	-0.411561025862502	0.614	0.732	1.27335257545941e-140
UBE2E1	5.90783423160953e-145	0.314303271000237	0.777	0.429	1.42792353378002e-140
DHRSX	7.34244376749644e-145	0.260427846020808	0.506	0.16	1.77466865860389e-140
MAN1C1	8.97229843202999e-145	-0.19121001419155	0.057	0.234	2.16860453102165e-140
SLC41A3	1.08238106245667e-144	-0.406464620092726	0.589	0.721	2.61611502795776e-140
TIGAR	1.24599004427784e-144	0.23771147591885	0.382	0.063	3.01155793701954e-140
CLPP	1.73148351238787e-144	0.314475023897922	0.916	0.696	4.18499564944149e-140
ZNF33A	2.16977211822084e-144	-0.337700690119927	0.191	0.419	5.24433920973976e-140
KIF26A	2.71637541913069e-144	-0.282355921471741	0.126	0.344	6.56547938803888e-140
AFAP1	2.8125395783123e-144	-0.423095526998058	0.452	0.634	6.79790816078082e-140
GTF2H5	2.93584056825523e-144	0.325662064416348	0.855	0.555	7.0959266534729e-140
DLGAP5	4.95555860344137e-144	0.337649620409375	0.287	0.006	1.19775851445178e-139
CHMP3	5.56790898494854e-144	-0.366655987578984	0.778	0.826	1.34576360166206e-139
PTPRJ	6.86137884229753e-144	-0.155258977446726	0.034	0.18	1.65839526618331e-139
SNRPG	7.09010293948063e-144	0.333539923536827	0.985	0.935	1.71367788047247e-139
ACAT2	7.64769885496997e-144	0.350860172803451	0.472	0.145	1.84844881324624e-139
PPIL4	8.03100904727217e-144	-0.365890376165874	0.277	0.503	1.94109488672568e-139
SYT5	1.44113128415973e-143	-0.116005254992118	0.008	0.105	3.48321431381406e-139
ATRX	1.51641987208627e-143	-0.37515658865578	0.639	0.747	3.66518683083251e-139
EMC9	1.57203595292428e-143	0.2851884981642	0.51	0.167	3.79961089821798e-139
SLC25A37	1.89964469173157e-143	-0.409477268881956	0.728	0.803	4.59144121991521e-139
CWF19L2	2.26964349787002e-143	-0.295553874467033	0.134	0.349	5.48572833435185e-139
PITPNC1	2.3154350753588e-143	-0.237402875427354	0.085	0.279	5.59640657714221e-139
C11orf58	2.841631382502e-143	-0.316940708403036	0.931	0.927	6.86822305150734e-139
LRR1	3.369380652415e-143	0.281320318570587	0.442	0.115	8.14379303688707e-139
HSP90AA1	4.2722466804652e-143	0.393991832839221	0.991	0.974	1.03260202266844e-138
ARL3	4.835586509907e-143	0.312902130272859	0.797	0.474	1.16876125944452e-138
G6PD	1.15477274813495e-142	0.291512602710449	0.575	0.218	2.79108573224217e-138
XRN1	1.78552314683225e-142	-0.295625864408821	0.154	0.376	4.31560944589354e-138
CREB5	7.38998831170241e-142	-0.302583613001163	0.143	0.363	1.78616017493847e-137
CTD-3252C9.4	8.45435089631932e-142	0.30743506728189	0.481	0.148	2.04341661164038e-137
DAPK3	8.71691081649337e-142	0.303327883057614	0.718	0.352	2.10687734434645e-137
PIK3IP1	9.51533912841172e-142	-0.198724714269683	0.054	0.222	2.29985746733711e-137
SSBP4	1.30254554250608e-141	-0.387224359095163	0.582	0.718	3.14825257623718e-137
CMTM6	1.37539178695147e-141	0.311812524490638	0.739	0.387	3.32432194906171e-137
FLNC	1.50116186524501e-141	0.237007427091391	0.372	0.061	3.62830822829718e-137
RNASEH2C	1.52370698204259e-141	0.301874073896811	0.951	0.786	3.68279977559695e-137
TOMM20	1.80745000187239e-141	0.318047564835318	0.977	0.857	4.36860665452558e-137
TACC3	1.90437336682565e-141	0.357191487407355	0.335	0.042	4.6028704276176e-137
RP11-490M8.1	1.91879758755696e-141	-0.411567307577618	0.495	0.663	4.63773376912517e-137
KMT2A	2.1359962142802e-141	-0.388286473423932	0.303	0.52	5.16270284991525e-137
CDH11	2.3860340091054e-141	-0.36439240827971	0.24	0.476	5.76704420000775e-137
TNRC6B	4.16987537014059e-141	-0.410827669878687	0.467	0.643	1.00785887696298e-136
CD302	4.38568387423759e-141	-0.359986217747759	0.241	0.467	1.06001979240323e-136
ATF4	5.24570979394543e-141	0.364604524502224	0.958	0.796	1.26788805719661e-136
COPZ1	1.24527695402776e-140	0.311490048313858	0.868	0.577	3.00983439788509e-136
SERINC3	2.15805156094234e-140	-0.36989767625913	0.598	0.727	5.21601062279764e-136
LAMTOR5	2.17618952837465e-140	0.253828945488128	0.992	0.942	5.25985009008154e-136
IL15	2.28693591699589e-140	-0.185527320337136	0.054	0.223	5.52752411137908e-136
ZNF354B	2.95760810999782e-140	-0.1610211987812	0.035	0.181	7.14853880186472e-136
ADD1	4.01674396196562e-140	-0.403893559867414	0.594	0.711	9.70847015607091e-136
TCP11L2	4.07901468142425e-140	-0.131057897902185	0.023	0.149	9.85897848500241e-136
ETFA	4.56906084966631e-140	0.307231561403897	0.762	0.427	1.10434200736435e-135
RNF149	4.65951659473524e-140	0.273003397984966	0.525	0.181	1.12620516094751e-135
IFT122	5.39169411215353e-140	-0.255297487177759	0.107	0.31	1.30317246690751e-135
ROCK1	7.44667546605356e-140	-0.3925833769302	0.512	0.663	1.79986146014515e-135
DKK1	1.1408374824366e-139	0.397273778754232	0.27	0	2.75740419504927e-135
CCDC58	2.17658589428107e-139	0.23154745216457	0.432	0.104	5.26080810647736e-135
ATXN7L3B	4.31980077301597e-139	-0.327264708844272	0.22	0.448	1.04409584683796e-134
MGAT4B	4.75720468340316e-139	0.295489434436975	0.593	0.246	1.14981637197854e-134
CDCA3	6.68156073755592e-139	0.330083719203562	0.277	0.005	1.61493323026727e-134
WIPI1	7.12551828807301e-139	0.251169516251391	0.461	0.125	1.72223777022725e-134
ATL2	1.13706829416627e-138	-0.255171968549998	0.105	0.304	2.74829406699987e-134
COX7A2	2.1639726484882e-138	0.211861919607546	0.999	0.995	5.23032189139597e-134
ATG7	3.37925695374004e-138	0.27239719309583	0.5	0.163	8.16766405718968e-134
FAM189A2	4.32162044833552e-138	-0.128448710894098	0.018	0.135	1.0445356623627e-133
OLA1	7.54768466422191e-138	0.305842492932234	0.897	0.628	1.82427538334243e-133
PLS3	1.40283482318026e-137	0.331017971279356	0.833	0.544	3.39065176762668e-133
ARPC5	1.81543571322284e-137	0.304934987104079	0.978	0.892	4.38790811885959e-133
PLEKHA3	6.20921378552401e-137	-0.34991943600059	0.272	0.491	1.50076697196115e-132
PTGS2	6.87362881799724e-137	-0.387418482077365	0.176	0.402	1.66135608530993e-132
SPC25	1.20215688984682e-136	0.314842977206117	0.269	0.003	2.90561320275977e-132
FKBP3	1.78616538892136e-136	0.32686495684465	0.861	0.614	4.31716174502292e-132
STEAP2	1.89424624884881e-136	-0.115371932452034	0.016	0.129	4.57839318346759e-132
TRIP13	1.95360530398963e-136	0.241608148890449	0.279	0.008	4.72186401974293e-132
ANKRD1	2.41818109351398e-136	0.436655403778079	0.482	0.158	5.84474370302329e-132
SLC35F2	2.99861754830446e-136	0.228039906295747	0.369	0.064	7.24765861425188e-132
DCXR	4.42941660263765e-136	0.312719285526544	0.83	0.532	1.07058999285752e-131
TCP1	1.06448757277158e-135	0.326596696872204	0.872	0.622	2.57286646338892e-131
PSME1	2.01058152593389e-135	-0.303418510528312	0.92	0.943	4.85957554818221e-131
CEP55	2.66713229955758e-135	0.279634220560856	0.267	0.002	6.44645876803068e-131
B3GNT7	3.13104388147683e-135	-0.133036643939588	0.02	0.14	7.56773306152949e-131
CCDC47	3.48805867200848e-135	-0.40860540696712	0.4	0.586	8.4306378102445e-131
CORO1C	3.89352013415649e-135	0.286383375685344	0.672	0.319	9.41063816425624e-131
STMN1	5.46033761530077e-135	0.416563173294808	0.994	0.964	1.3197636016182e-130
HMG20B	9.50003311611046e-135	0.308099421759788	0.783	0.449	2.2961580041639e-130
MRPL51	1.15733277949656e-134	0.272727242268628	0.99	0.931	2.79727332804319e-130
SLF2	1.32085417071762e-134	-0.279931457881754	0.146	0.359	3.19250453062449e-130
CALCOCO1	2.23495357580675e-134	-0.289484968963643	0.159	0.377	5.40188279272492e-130
NDUFB11	2.65528241695146e-134	0.244783227054855	0.995	0.959	6.41781760177169e-130
NDUFS2	3.04002932998706e-134	0.316273615457023	0.802	0.511	7.34775089057873e-130
NRK	3.17041103891838e-134	-0.112837616625723	0.012	0.113	7.66288348106572e-130
ZNF580	4.21313167937922e-134	0.316504424020845	0.874	0.584	1.01831392690596e-129
ATAD3A	4.2708063482407e-134	0.231205350164313	0.395	0.084	1.03225389436978e-129
MKKS	4.87783103521405e-134	0.315861151292848	0.833	0.529	1.17897176121124e-129
RHOG	5.81526986043331e-134	0.307512864587712	0.854	0.573	1.40555072526673e-129
ZMAT1	9.59701210582273e-134	-0.164093666648462	0.039	0.187	2.31959782597735e-129
CASP10	1.34657978621498e-133	-0.302580976698988	0.18	0.401	3.25468334328161e-129
TMEM8A	1.40147177925161e-133	0.235401995344545	0.411	0.099	3.38735729045114e-129
NUDT5	1.42332640758816e-133	0.323670619351845	0.826	0.563	3.44017992714058e-129
SIGMAR1	1.61733072656557e-133	0.298796225346374	0.674	0.335	3.90908836610898e-129
SLC16A5	1.74074017205198e-133	-0.189480488907389	0.053	0.214	4.20736899584964e-129
MYBL2	1.83219349855614e-133	0.268622322289351	0.274	0.009	4.4284116860102e-129
SIRPB2	2.1033653512951e-133	-0.136619673252222	0.022	0.144	5.08383405408026e-129
TMPO	2.84692561232479e-133	-0.362067930948116	0.376	0.602	6.88101920498903e-129
RUNDC1	3.10859692641976e-133	-0.232703374597759	0.092	0.283	7.51347877115656e-129
UQCRB	3.16287144869858e-133	-0.200084498655972	1	1	7.64466029150446e-129
TTC3	3.52686608358311e-133	-0.358050020639979	0.746	0.81	8.52443532402037e-129
HIF1A	4.22325791234206e-133	-0.41923118236433	0.598	0.709	1.02076143741308e-128
KIAA1109	4.22850862026445e-133	-0.285870683619626	0.142	0.354	1.02203053351792e-128
CTNNB1	4.22914623760684e-133	-0.371283481572688	0.622	0.758	1.02218464562957e-128
ZNF703	4.35756374186666e-133	-0.25071938037986	0.11	0.309	1.05322315640917e-128
MYZAP	4.61076764899778e-133	0.218557957536613	0.271	0.006	1.11442254076276e-128
TSEN34	5.03337159701514e-133	0.297801347237854	0.759	0.421	1.21656591499856e-128
MLYCD	6.04704421156367e-133	-0.150165637595452	0.035	0.175	1.46157058593494e-128
SRM	6.11113083727235e-133	-0.358898593584563	0.64	0.758	1.47706032336873e-128
ADAMTS4	9.31089960912302e-133	0.283063765615366	0.325	0.042	2.25044443552503e-128
TWIST2	1.21044915199947e-132	-0.150230261619946	0.026	0.153	2.92565560038273e-128
PTP4A1	1.51231393472773e-132	0.275786931340399	0.631	0.279	3.65526278023693e-128
PPP1R15A	1.78589340010218e-132	-0.407922549308558	0.64	0.746	4.31650434804696e-128
LSM5	2.23661986681124e-132	0.341654196436471	0.933	0.773	5.40591021808277e-128
TIE1	2.32696612569719e-132	0.345075936177967	0.864	0.579	5.62427712581011e-128
CAPN1	4.85229059785688e-132	0.285973454723767	0.677	0.328	1.17279863750201e-127
MAGEH1	5.73664250063615e-132	-0.405102829200759	0.443	0.621	1.38654649240376e-127
PHLDA1	6.990750307787e-132	0.299914673266252	0.597	0.256	1.68966434939212e-127
ZC3H7A	1.08965741173184e-131	-0.309921647957467	0.191	0.411	2.63370196415586e-127
CTTN	1.6255021768744e-131	0.33118864195857	0.816	0.5	3.92883876150544e-127
DNAJB14	1.8055952822042e-131	-0.348352430401933	0.254	0.469	4.36412379708755e-127
FADS1	2.7131310754598e-131	0.270694888561724	0.524	0.19	6.55763780938633e-127
WDR54	3.05026361765612e-131	0.299534238728839	0.763	0.431	7.37248716387485e-127
N4BP3	3.56230866875987e-131	0.233536447044429	0.26	0.002	8.6101000523926e-127
BAZ1A	3.77416523778567e-131	0.294807537010798	0.632	0.295	9.12215737972795e-127
HCFC2	4.42882011351299e-131	-0.18492941551715	0.057	0.22	1.07044582143609e-126
SERPINH1	4.70829337040935e-131	0.325160713353474	0.886	0.644	1.13799450762794e-126
MXD3	4.96037121563849e-131	0.37146138330955	0.297	0.026	1.19892172281982e-126
NLGN1	7.09865965808015e-131	-0.2120201325635	0.073	0.248	1.71574603935797e-126
TMEM51	1.08689631695716e-130	0.197479413669808	0.284	0.016	2.62702839808545e-126
PMF1	1.3340989683315e-130	0.294776209783775	0.767	0.438	3.22451720645723e-126
CCDC124	1.41584700555091e-130	0.298514019651159	0.893	0.661	3.42210221241654e-126
MZT1	1.64493283831051e-130	0.336452841746351	0.557	0.233	3.97580267019651e-126
CRCP	1.75519192674978e-130	-0.256608915646663	0.111	0.307	4.24229888695421e-126
NCL	3.36798311257903e-130	-0.274822448932749	0.915	0.962	8.14041518310352e-126
PPP1R10	4.13068019603937e-130	-0.311377837068483	0.196	0.41	9.98385403382715e-126
IFIT2	5.42088332282228e-130	-0.146552030542155	0.032	0.169	1.31022749912615e-125
PLCG2	5.8463390035983e-130	-0.187271468291067	0.064	0.234	1.41306013716971e-125
CSE1L	8.54751493080998e-130	0.269600585206276	0.513	0.187	2.06593435877677e-125
POLR3GL	9.16541782337034e-130	-0.368455762956017	0.624	0.724	2.21528148790861e-125
BORCS8	9.6205032950437e-130	0.240709208930225	0.515	0.182	2.32527564641206e-125
TRAPPC2L	1.04383138137368e-129	0.291957703205213	0.876	0.626	2.52294044878019e-125
PON2	1.37017257827411e-129	-0.392522612661845	0.756	0.82	3.31170712168852e-125
MXI1	1.46396907072985e-129	-0.227943435221902	0.083	0.266	3.53841324395404e-125
KIAA0355	1.4882374507525e-129	-0.387729493915842	0.43	0.599	3.59706991846878e-125
SIVA1	1.70506588395818e-129	0.287264567258254	0.99	0.929	4.12114424152693e-125
MYL4	1.76985642833037e-129	-0.107565085876606	0.014	0.118	4.27774298727451e-125
SLC22A17	1.86879651231015e-129	-0.222395080906668	0.096	0.288	4.51688117025363e-125
SLC1A5	1.91198357633908e-129	0.249122533720447	0.478	0.154	4.62126430401156e-125
MALT1	2.82163784811516e-129	-0.181451432384488	0.044	0.192	6.81989867889435e-125
GNPNAT1	3.2141155269094e-129	0.22159959798161	0.413	0.101	7.76851722854002e-125
ESCO1	4.0538665686492e-129	-0.222704476730082	0.077	0.254	9.79819549642511e-125
CEP162	5.78065478108143e-129	-0.175441342120571	0.043	0.19	1.39718426058738e-124
GPM6A	6.94691424930336e-129	-0.119535860177431	0.015	0.12	1.67906917405662e-124
CCT3	7.08055108610547e-129	0.279153251988461	0.971	0.878	1.71136919751169e-124
GTF2A2	7.59036618801442e-129	0.295474057641757	0.929	0.76	1.83459150764309e-124
TM9SF3	9.55940946693485e-129	-0.376791474873676	0.623	0.712	2.31050926815815e-124
SMCHD1	1.45586642932363e-128	-0.306485806847403	0.197	0.414	3.51882915967521e-124
ECSCR.1	2.05972648247352e-128	-0.214952634235525	0.999	0.999	4.97835890813849e-124
MS4A2	2.80535105410954e-128	-0.317594074428906	0.076	0.253	6.78053349778277e-124
BAG1	3.74313407209533e-128	-0.354565788408762	0.705	0.778	9.04715505225442e-124
FAM174B	4.93484173017592e-128	0.218556875705468	0.278	0.016	1.19275124618352e-123
ARMC7	5.20095858798028e-128	-0.280378018034016	0.157	0.369	1.25707169071483e-123
TNFSF15	6.45481301510198e-128	0.232949421701856	0.282	0.018	1.56012830575015e-123
FNDC3A	6.65863426496433e-128	-0.355314805236988	0.327	0.53	1.60939190184188e-123
TRIB2	7.05108464046023e-128	-0.272383747623272	0.136	0.342	1.70424715759924e-123
ZNF429	7.0826508150102e-128	-0.112638884775251	0.017	0.127	1.71187670198797e-123
MRPL42	1.17645475240863e-127	0.29119024763371	0.72	0.388	2.84349113657165e-123
NUDT22	1.59284846176494e-127	0.257319282561428	0.601	0.255	3.84991473208585e-123
ANGPT2	1.9474052916468e-127	0.283346448110088	0.387	0.087	4.70687858991031e-123
OCLN	2.94369746629484e-127	-0.210747173313631	0.079	0.259	7.11491677603463e-123
LEPROT	3.05041052923965e-127	-0.363883804555505	0.759	0.799	7.37284224917224e-123
ATP5I	3.48150695743087e-127	-0.274248974678838	0.983	0.972	8.41480231611042e-123
APOPT1	4.3304804279396e-127	0.299312061652072	0.866	0.594	1.046677119433e-122
KIAA2026	5.37059311831506e-127	-0.301438415045425	0.206	0.421	1.29807235669675e-122
DOCK4	9.17904801134367e-127	0.248339848010968	0.474	0.153	2.21857590434177e-122
MET	9.63075912829701e-127	-0.345404228418759	0.248	0.457	2.32775448130939e-122
RDX	1.08453950891921e-126	0.344132975818777	0.93	0.752	2.62133199305773e-122
AURKA	1.08963954840589e-126	0.337462237705479	0.271	0.014	2.63365878849704e-122
POLE4	1.09470882711036e-126	-0.3605981611929	0.739	0.803	2.64591123512573e-122
TMEM106C	1.30689392231267e-126	0.37776460427804	0.641	0.338	3.15876261022973e-122
LAMTOR1	1.42434305153356e-126	0.268510547894369	0.977	0.863	3.44263715555662e-122
FKBP10	1.70570676147225e-126	0.30067186518195	0.803	0.492	4.12269324247844e-122
TSPAN15	1.80180479301494e-126	0.218368202703343	0.256	0.004	4.35496218471711e-122
CMIP	1.80353507901328e-126	-0.35551698811287	0.706	0.772	4.35914428597511e-122
MYH10	2.05576817202753e-126	0.329301339021751	0.635	0.303	4.96879167179055e-122
TSPAN5	2.18225684993733e-126	0.247121748392049	0.455	0.14	5.27451480629853e-122
TM7SF2	2.23739693832037e-126	0.248149615565537	0.391	0.092	5.40778839992034e-122
ANLN	2.71973256792566e-126	0.249668797257054	0.252	0.002	6.57359361667633e-122
ERLEC1	3.6706982781323e-126	-0.36917635633069	0.558	0.682	8.87207773824577e-122
MRPL27	4.81736503450011e-126	0.304648843973067	0.855	0.59	1.16435712883868e-121
TMSB4X	6.33543574789507e-126	0.262579065880159	1	1	1.53127482026624e-121
EPHB2	1.24657677900513e-125	0.191581442569623	0.254	0.004	3.0129760748554e-121
MRPL57	1.26360640379961e-125	0.300106637123507	0.96	0.819	3.05413667798366e-121
ACLY	1.50046003394905e-125	0.254472456220194	0.603	0.256	3.62661190205485e-121
CNBP	2.15858684576056e-125	-0.297789140915912	0.947	0.938	5.21730440620327e-121
KIF5B	2.30467540543841e-125	-0.307833323687829	0.93	0.945	5.57040045494464e-121
CDC42EP2	2.44096471613385e-125	0.310951754152787	0.588	0.271	5.89981171889552e-121
PSMA1	3.09148102989073e-125	0.280902879477817	0.951	0.826	7.4721096492459e-121
GOLGA4	3.80751833559679e-125	-0.366292349368225	0.552	0.683	9.20277181713744e-121
RNH1	4.22073563222742e-125	0.298521428832222	0.953	0.807	1.02015180230937e-120
ARHGAP5	4.29629355315921e-125	-0.290312579948659	0.165	0.37	1.03841415179858e-120
KDELR3	5.00063667875184e-125	0.279227689526837	0.637	0.295	1.20865388525432e-120
ZNF467	5.41063266505342e-125	-0.346414501722066	0.357	0.573	1.30774991514341e-120
TRPT1	6.72583160375633e-125	0.268832528759075	0.6	0.263	1.62563349862791e-120
ELMO1	8.34795838327243e-125	-0.32429825094942	0.245	0.46	2.01770154123695e-120
FOXO3	1.10886693020517e-124	-0.290183761702786	0.169	0.381	2.6801313703059e-120
TAF10	1.29245914750643e-124	-0.302344263924318	0.189	0.401	3.12387375952305e-120
DUSP22	1.43197848536229e-124	-0.354518987527698	0.348	0.541	3.46109199912066e-120
RBM8A	1.48467784996754e-124	0.297549770806665	0.963	0.866	3.58846636337154e-120
ZNF302	2.56849955424898e-124	-0.273485714721188	0.143	0.346	6.20806342261978e-120
TUSC3	2.7263506880055e-124	0.211778743527425	0.357	0.067	6.58958961290929e-120
LINC-PINT	3.95036314223437e-124	-0.132842666148233	0.025	0.147	9.54802771478047e-120
FURIN	4.8975430864551e-124	0.263565480952692	0.567	0.238	1.1837361639962e-119
STAU1	5.19764425557216e-124	-0.364243660723298	0.688	0.75	1.25627061657179e-119
UQCC3	5.47168185320705e-124	0.305477799108602	0.821	0.522	1.32250550392014e-119
DHH	6.59260323077507e-124	-0.145158155926992	0.028	0.151	1.59343220087833e-119
HNMT	6.81841586487139e-124	0.200075315128425	0.272	0.016	1.64801111453942e-119
AGO3	1.06179603783225e-123	-0.330828939019735	0.234	0.445	2.56636102344055e-119
FAM64A	1.10807704520145e-123	0.247814050593643	0.247	0.002	2.67822221825192e-119
ARID4B	1.12701327791741e-123	-0.361916069713349	0.51	0.654	2.72399109272637e-119
ETS2	1.60228697165471e-123	-0.371783692219307	0.316	0.518	3.87272761048943e-119
ASPM	2.1187079680936e-123	0.311420171956591	0.256	0.007	5.12091715888224e-119
CCDC171	2.24179370185282e-123	-0.106609869669448	0.01	0.102	5.41841537737827e-119
BRK1	2.35588133381638e-123	0.223556644989526	0.999	0.991	5.6941651838342e-119
NCOA3	2.76414157074146e-123	-0.273839141605258	0.148	0.353	6.6809301764821e-119
SLC39A4	4.34446997444887e-123	0.225873209138494	0.409	0.108	1.05005839282429e-118
BLOC1S4	4.52956866749456e-123	-0.216117483366704	0.084	0.261	1.09479674693344e-118
PLA2G4A	5.71112315231228e-123	0.323953042024772	0.512	0.202	1.38037846591388e-118
SPCS3	8.13358197520289e-123	0.298283499371275	0.839	0.567	1.96588676340654e-118
GALE	9.09069310186564e-123	0.251041929188735	0.529	0.205	2.19722052272093e-118
CCT2	1.29818309149876e-122	0.327187421785829	0.862	0.631	3.13770853215249e-118
TP53I11	1.48810053738651e-122	0.320489740356587	0.627	0.309	3.59673899886321e-118
R3HDM2	1.52735717948993e-122	-0.285007244952814	0.159	0.363	3.69162230282717e-118
EIF2S3	2.24476071704026e-122	-0.387224672516894	0.72	0.764	5.4255866530863e-118
COX17	2.84895204315275e-122	-0.372066267781772	0.796	0.827	6.8859170883002e-118
OSTM1	3.62092865138998e-122	-0.242555127835963	0.106	0.293	8.75178455040958e-118
VCAN	3.86657170111351e-122	-0.153841556292129	0.011	0.102	9.34550380159136e-118
HLA-DPB1	4.60644792795864e-122	-0.329056768358926	0.228	0.436	1.1133784641876e-117
CD2AP	5.39578610134211e-122	-0.305743361598166	0.198	0.407	1.30416150069439e-117
FDFT1	7.54203057471984e-122	0.340579955911393	0.681	0.374	1.82290878990979e-117
KRIT1	8.91961488408087e-122	-0.327482622602339	0.245	0.453	2.15587091748235e-117
IK	1.05931143498442e-121	-0.354980345254493	0.648	0.751	2.56035573835735e-117
FBN1	1.06135999834545e-121	-0.334001424281519	0.257	0.471	2.56530711600095e-117
MRPL35	1.17580374571247e-121	0.244693003688355	0.546	0.215	2.84191765338703e-117
CXCL1	1.28432250251695e-121	0.518394042544449	0.266	0.017	3.10420748858346e-117
EIF2B2	1.61253961443918e-121	0.332842318424044	0.638	0.327	3.8975082480995e-117
PSMG3	2.14967468018644e-121	0.254487723477377	0.628	0.284	5.19576370201062e-117
AEN	2.43793110165353e-121	0.205378584175577	0.324	0.048	5.89247947269659e-117
NDUFA4	2.86654317224207e-121	0.213756198304202	0.999	0.991	6.92843484730909e-117
GLIPR1	3.71780259766777e-121	0.265980072591485	0.399	0.105	8.985928878563e-117
USP18	3.90185091147929e-121	0.257635880174457	0.479	0.169	9.43077365304544e-117
CBFB	4.47495858104374e-121	0.254800997528157	0.48	0.17	1.08159748903827e-116
ZNF800	4.74740719686489e-121	-0.282377751941088	0.163	0.367	1.14744831948224e-116
NOP56	7.12934147580544e-121	0.310171850233658	0.738	0.428	1.72316183470217e-116
ITGAV	1.0601227504526e-120	0.254108641507752	0.53	0.208	2.56231668784394e-116
GLIS3	1.26107457688269e-120	-0.138181976240943	0.025	0.145	3.04801725232546e-116
SCCPDH	1.29920980125075e-120	0.281629432824109	0.724	0.401	3.14019008962307e-116
SLC4A7	2.58491214794743e-120	0.230817958704542	0.379	0.091	6.24773266158894e-116
BZW1	2.95944795822534e-120	0.301944375066693	0.9	0.7	7.15298571503066e-116
COLGALT1	4.74353311176703e-120	0.227847167270149	0.397	0.101	1.14651195311409e-115
ADGRL1	6.08284401956826e-120	-0.280351964131207	0.177	0.387	1.47022339952965e-115
CHCHD7	8.3414111099271e-120	0.249954512103229	0.577	0.24	2.01611906526938e-115
HAGLR	9.85372682136604e-120	0.189496172181967	0.249	0.006	2.38164577272417e-115
AKT1S1	1.1500880921696e-119	0.270664262162044	0.705	0.373	2.77976291877392e-115
EEF1D	1.21181091155821e-119	-0.162146415402168	1	1	2.92894697323619e-115
OTUD6B-AS1	1.54984169468631e-119	-0.364727015330741	0.372	0.553	3.7459673760568e-115
WNK1	1.58346923075893e-119	-0.371227174716727	0.47	0.622	3.82724513074434e-115
TCF3	1.81361028910487e-119	0.233894440456611	0.457	0.151	4.38349606876646e-115
MDM2	1.82341607329671e-119	0.277105209486673	0.429	0.135	4.40719664915814e-115
EFCAB14	3.5600184259386e-119	-0.336238164808662	0.383	0.575	8.60456453549359e-115
MYOM2	5.17441654401619e-119	-0.137851492002421	0.026	0.144	1.25065647868871e-114
MRPL54	6.23373338904688e-119	0.286960518566689	0.904	0.67	1.50669336013263e-114
MIER1	6.88844839993996e-119	-0.360195871803786	0.421	0.587	1.66493797826549e-114
EIF2AK4	8.49513807717662e-119	0.276824812826979	0.737	0.414	2.05327487325359e-114
NHSL2	1.39619138000079e-118	-0.326836010299297	0.284	0.488	3.37459456546192e-114
EBP	1.40099031838914e-118	0.289214993278244	0.589	0.272	3.38619359954656e-114
RPP25	1.7960528524614e-118	0.295806445947503	0.618	0.293	4.3410597443992e-114
TFRC	1.81404254389113e-118	0.218727005593736	0.327	0.058	4.38454082858486e-114
OS9	1.826870954203e-118	-0.365589205320347	0.629	0.731	4.41554709630866e-114
SSH2	2.20406802155314e-118	0.240144822249999	0.536	0.213	5.32723240809395e-114
ADSSL1	2.37547462077531e-118	-0.245001097303793	0.11	0.297	5.74152215841393e-114
GMFG	2.86444818245578e-118	0.328152947644965	0.441	0.151	6.92337125699562e-114
TSR3	2.87764977331394e-118	-0.337700072204758	0.317	0.508	6.9552795020998e-114
SLTM	3.94319355512866e-118	-0.367957251408085	0.512	0.646	9.53069882274598e-114
POLDIP2	7.33634704289314e-118	0.274692496448691	0.752	0.43	1.77319508026727e-113
MPV17	8.28424587153603e-118	0.274848825348281	0.803	0.492	2.00230222715026e-113
NT5DC2	9.99664487765436e-118	0.241984791070939	0.473	0.165	2.41618906692906e-113
WASF2	1.02835807491103e-117	-0.284907759742689	0.954	0.943	2.48554146705997e-113
PSORS1C1	1.30251505638624e-117	0.206001913767018	0.298	0.038	3.14817889128554e-113
MRPS23	1.77996916752447e-117	0.264781453589169	0.699	0.373	4.30218547790663e-113
GOLIM4	2.50060895211058e-117	-0.360157635198137	0.403	0.584	6.04397183725128e-113
KLHDC3	2.52180926302965e-117	0.261563641727849	0.696	0.363	6.09521298874266e-113
AC093673.5	2.73850214358121e-117	0.237903622122045	0.491	0.179	6.61895968103578e-113
HSP90B1	3.0695803688477e-117	-0.292331753303303	0.93	0.971	7.41917575150489e-113
METTL7A	3.37612498515645e-117	-0.245424046611265	0.14	0.341	8.16009408912315e-113
NMRAL1	4.41016004828903e-117	0.260157547470355	0.639	0.308	1.06593568367146e-112
PDZD11	4.50242117510921e-117	0.265647092287256	0.721	0.388	1.0882351980239e-112
ZNF181	5.8826050457713e-117	-0.156401350034507	0.045	0.186	1.42182563956292e-112
NBPF12	1.25254239395844e-116	-0.115461550935887	0.022	0.134	3.02739496619755e-112
MARCH5	1.93356265467445e-116	0.230238566540909	0.529	0.21	4.67342093634815e-112
RASSF2	1.93997010769369e-116	0.199783725052072	0.25	0.01	4.68890775029564e-112
ISOC2	2.125897559737e-116	0.286060779451426	0.847	0.567	5.13829440188432e-112
CCDC109B	2.24032294496052e-116	0.287549208925602	0.709	0.4	5.41486055796957e-112
MARCH8	2.6024461354289e-116	-0.241662733405539	0.119	0.307	6.29011230933166e-112
SAMD5	2.61341679505773e-116	-0.157370171074967	0.044	0.185	6.31662839365453e-112
ZCCHC24	2.72076804892051e-116	-0.296539026084162	0.195	0.404	6.57609637424086e-112
ZCCHC11	3.00727600394135e-116	-0.282950195564807	0.168	0.368	7.26858610152625e-112
MTRF1L	3.07018776736191e-116	-0.381057371839592	0.48	0.62	7.42064383371374e-112
MCFD2	3.75949583326155e-116	0.306292664811573	0.772	0.49	9.08670142899318e-112
SF3B1	4.47126544725436e-116	-0.370816340585099	0.593	0.692	1.08070485860138e-111
SPC24	1.0126186622726e-115	0.229485419940875	0.246	0.009	2.44749930671286e-111
HIP1	1.10335826592565e-115	-0.317478672290891	0.272	0.474	2.6668169287423e-111
CCL23	1.39434645940683e-115	0.372330572778433	0.285	0.034	3.37013539238631e-111
ZNF577	1.65580785440111e-115	-0.125181863679221	0.025	0.14	4.00208758408748e-111
PSMA4	1.86077305599668e-115	0.338761917504982	0.925	0.799	4.49748847634398e-111
IGFBP2	1.89529771996302e-115	-0.37361941903198	0.647	0.741	4.58093458915061e-111
DNAJC3	1.98138462610265e-115	-0.366023915155432	0.404	0.577	4.78900664129011e-111
OTUB1	2.05300650318276e-115	0.270022044697612	0.788	0.485	4.96211671819273e-111
ADSL	2.14601129120641e-115	0.269188514980611	0.735	0.42	5.1869092908459e-111
BIN1	2.27824337402615e-115	0.239178992080839	0.554	0.23	5.50651423502119e-111
ABL2	2.28897163466341e-115	0.305310312517032	0.818	0.51	5.53244444098147e-111
SLC50A1	2.58253577309445e-115	0.245042352855639	0.568	0.243	6.24198896356929e-111
ZFR	4.0147190400193e-115	-0.339738674779735	0.373	0.555	9.70357591972665e-111
TDRD3	5.35908283773177e-115	-0.218283681036916	0.096	0.274	1.29529032187977e-110
CENPH	5.94791810635666e-115	0.222407085609596	0.315	0.054	1.4376118063064e-110
YTHDC1	6.10764592443191e-115	-0.357033156878626	0.472	0.617	1.47621801993519e-110
KIAA0040	6.61193586779449e-115	0.201979026132426	0.273	0.025	1.59810489924593e-110
ELP5	8.449306152243e-115	0.243397214018546	0.626	0.293	2.04219729699713e-110
PPFIBP1	8.9175023260389e-115	-0.354780580994746	0.67	0.755	2.1553603122036e-110
UBE2J2	1.044013996456e-114	0.270364130403339	0.769	0.441	2.52338182943415e-110
STIP1	1.20079738215056e-114	0.272086737872163	0.646	0.328	2.9023272726579e-110
GINS2	1.8953108067618e-114	0.254092037580216	0.256	0.016	4.58096621994327e-110
LMBRD1	2.33924783458261e-114	-0.27497023332523	0.196	0.4	5.65396201618617e-110
NHLRC3	3.0518254310235e-114	-0.261114891382905	0.144	0.336	7.3762620667838e-110
COL6A1	3.06474045319323e-114	-0.294578193806611	0.209	0.414	7.40747767536805e-110
ADA	3.52775560636851e-114	0.226119655722543	0.448	0.145	8.5265853005927e-110
TNFAIP1	4.00330235337953e-114	-0.383381219594614	0.531	0.649	9.67598178811833e-110
SSR4	6.22608837355647e-114	0.215515742923798	0.999	0.993	1.5048455598886e-109
SON	6.53664514490745e-114	-0.307238607142576	0.892	0.896	1.57990713152413e-109
RP11-392P7.6	9.6160860262995e-114	0.193685650394016	0.305	0.045	2.32420799255659e-109
PCF11	1.33211482620153e-113	-0.32053283770399	0.238	0.439	3.21972153492909e-109
LYAR	1.57293326050801e-113	0.292172256371024	0.541	0.239	3.80177969064787e-109
RCN3	1.62265206850661e-113	0.262810479636692	0.465	0.168	3.92195004958048e-109
PUSL1	3.77149395312016e-113	0.203309426268762	0.387	0.102	9.11570088469142e-109
PELI2	4.22498044365004e-113	-0.19654808953049	0.075	0.24	1.02117777323021e-108
SCARA3	5.62362554315375e-113	-0.354683226700291	0.457	0.621	1.35923029378026e-108
LARS	1.4461977868534e-112	-0.354675994356493	0.486	0.633	3.49546005082467e-108
SLC35B1	1.59684232483473e-112	0.250381127642877	0.687	0.357	3.85956789912554e-108
SCD	1.60373081018867e-112	0.228508305431815	0.385	0.106	3.87621736822601e-108
FPGS	1.70870533351095e-112	0.221883039856236	0.529	0.208	4.12994079109596e-108
MRTO4	1.74244236584739e-112	0.251341013165267	0.572	0.257	4.21148319825314e-108
IQGAP1	1.9955719077008e-112	-0.355467245476027	0.581	0.684	4.82329730091282e-108
SOX4	2.32123716698536e-112	0.320166518892634	0.949	0.767	5.61043023260362e-108
PRR11	3.18771672234312e-112	0.21810569349079	0.248	0.014	7.70471131790333e-108
DNASE1	3.28224817908621e-112	-0.134305790005288	0.033	0.157	7.93319384885136e-108
HADHA	3.41702393644736e-112	-0.322661884467449	0.796	0.829	8.25894685439328e-108
HOPX	3.82667358179424e-112	0.211583585238946	0.288	0.038	9.24907004719668e-108
BOP1	4.1107661371741e-112	0.217281405291535	0.443	0.143	9.9357217535498e-108
NOC3L	5.54710046008066e-112	-0.253481106730308	0.113	0.293	1.34073418120149e-107
IKBIP	5.79955654235906e-112	0.288510412060113	0.837	0.582	1.40175281628818e-107
ZBTB20	6.19102209474621e-112	-0.267306474450705	0.182	0.385	1.49637004030016e-107
POLR1D	1.4126062716198e-111	0.276441579058444	0.979	0.869	3.41426935850506e-107
ASAP2	1.62392667556957e-111	-0.355320889002638	0.36	0.538	3.92503077485165e-107
PSMB3	1.90255417322413e-111	0.276082231031849	0.976	0.92	4.59847343668272e-107
LRRC8A	2.00714715613827e-111	0.261654234143079	0.665	0.343	4.85127467638619e-107
KCNQ1OT1	2.65800406825384e-111	-0.318332874451728	0.159	0.355	6.42439583296952e-107
AFAP1L1	4.87969816942655e-111	0.194454803941328	0.285	0.036	1.1794230475504e-106
DHRS13	5.18397298028739e-111	-0.171834949070273	0.048	0.187	1.25296626933546e-106
NSRP1	6.83304792583229e-111	-0.3903327950737	0.507	0.635	1.65154768367366e-106
SNRNP70	1.115984232545e-110	0.286463775395117	0.843	0.586	2.69733389006126e-106
CENPU	1.2568320527722e-110	0.215339908555819	0.25	0.016	3.0377630715504e-106
SEC24D	1.475061306421e-110	0.215583306524481	0.47	0.164	3.56522317761955e-106
SEC61A1	1.76986629783152e-110	0.27645390794696	0.785	0.478	4.27776684185879e-106
MTX1	2.02994450303761e-110	0.271765971156601	0.73	0.436	4.9063758638419e-106
EVA1C	3.20751516589616e-110	-0.341146830336792	0.407	0.587	7.75256415597102e-106
ASF1B	3.81848093133387e-110	0.215062210242618	0.234	0.007	9.22926841103395e-106
SEMA6A	3.88324998259146e-110	-0.19938107093153	0.075	0.239	9.38581520792356e-106
PRELID3B	4.07548620882323e-110	0.23764979056493	0.613	0.293	9.85045016672574e-106
ZNF521	4.32850069729555e-110	-0.337924702225575	0.412	0.579	1.04619861853633e-105
DEGS1	5.52185854820977e-110	0.251777514746608	0.597	0.277	1.3346332111023e-105
RPUSD1	5.98663146924147e-110	0.209766737457579	0.473	0.166	1.44696882611566e-105
LL21NC02-21A1.1	6.24691872728614e-110	0.180184990006451	0.26	0.022	1.50988025638506e-105
INO80D	6.77583854363889e-110	-0.197714807545795	0.082	0.248	1.63772017599752e-105
GBGT1	7.11891560458349e-110	0.209869791325311	0.33	0.069	1.72064190162783e-105
DCTN2	8.02641534897859e-110	0.272683971724264	0.918	0.721	1.93998458984812e-105
PDE4B	9.36387997357284e-110	-0.360335955524503	0.379	0.551	2.26324978961256e-105
MTUS1	1.26340356059178e-109	-0.32494748529558	0.905	0.913	3.05364640595033e-105
TSFM	1.29869213676878e-109	0.22650654624812	0.515	0.207	3.13893889457015e-105
YTHDF2	1.47151843478128e-109	0.278227720920821	0.829	0.545	3.55666005686635e-105
CRYBG3	1.65844067618545e-109	-0.203169432793339	0.087	0.254	4.00845111434022e-105
AKAP7	2.2207177007774e-109	-0.107330693973885	0.019	0.122	5.36747468277898e-105
KAT6B	2.24828376536038e-109	-0.218319441198483	0.096	0.268	5.43410186087604e-105
MIA3	3.98725553249932e-109	-0.29648093735397	0.188	0.382	9.63719662205086e-105
SCAPER	4.79733577518845e-109	-0.200191949910541	0.082	0.246	1.15951605686305e-104
CDCA8	5.05748190299802e-109	0.245553216422339	0.228	0.005	1.22239337595462e-104
FERMT3	5.38795016719857e-109	0.213253959430159	0.286	0.038	1.3022675554119e-104
GCHFR	5.68461367473544e-109	-0.315339368312601	0.386	0.587	1.37397112518355e-104
SAP30L	5.69169096617904e-109	-0.176967670432296	0.071	0.229	1.37568170652547e-104
PLEKHA6	6.66594650881262e-109	-0.11171566086881	0.02	0.122	1.61115927118001e-104
LINC00969	7.59856924028225e-109	-0.302274427093781	0.218	0.415	1.83657418537622e-104
MRPL11	7.88862139742182e-109	0.259391725531298	0.921	0.715	1.90667979175685e-104
HMMR	7.99324853194101e-109	0.234410774536488	0.234	0.009	1.93196817017014e-104
SDF2L1	8.93609010337836e-109	0.334054037643907	0.789	0.541	2.15985297798655e-104
PSMB1	1.33153325201988e-108	0.259370754021956	0.986	0.941	3.21831587013206e-104
SDHA	1.45926191854348e-108	0.266472027309848	0.701	0.394	3.5270360571196e-104
OFD1	1.56155901626671e-108	-0.259299142756367	0.152	0.342	3.77428814231664e-104
SAE1	1.63645861782034e-108	0.259065764410432	0.659	0.34	3.95532047927176e-104
DUSP5	1.64202837233662e-108	-0.35746754426548	0.298	0.489	3.96878257593762e-104
CDC42BPB	1.73110974148937e-108	-0.341901569400746	0.446	0.596	4.1840922451798e-104
PSMD1	2.00473751755693e-108	0.273272765587825	0.676	0.374	4.84545057993509e-104
PREX1	2.07204738228922e-108	0.176520940051305	0.263	0.025	5.00813852299305e-104
ACBD3	2.13570816312526e-108	-0.29745002383978	0.23	0.426	5.16200663027375e-104
TPD52L2	2.37899909831217e-108	0.259632570931955	0.757	0.44	5.75004082062052e-104
TFF3	2.44659533735993e-108	-0.163202294985516	0.044	0.18	5.91342093039896e-104
RAB31	2.5339337492205e-108	0.200841236281184	0.39	0.11	6.12451787186596e-104
ANKRD28	2.59868341767421e-108	0.214696950909292	0.464	0.163	6.28101782051857e-104
MELK	4.760811815641e-108	0.184196518152768	0.221	0.002	1.15068821584043e-103
AVPI1	5.09424392879172e-108	-0.291766834400393	0.213	0.413	1.23127875758896e-103
SMYD2	6.58855030169567e-108	0.186137245492925	0.29	0.042	1.59245260791984e-103
RNF11	7.48180812547454e-108	-0.346142207774068	0.616	0.704	1.8083530239272e-103
MLLT6	8.83308340242697e-108	-0.287547080984372	0.225	0.425	2.1349562583666e-103
VPS29	9.76611808421446e-108	0.292650681505595	0.911	0.739	2.36047074095464e-103
FRYL	1.2430914847658e-107	-0.300801818903109	0.244	0.442	3.00455211867893e-103
OSMR	1.24666796183696e-107	-0.230634309219176	0.128	0.312	3.01319646375992e-103
RBM48	1.49927904629133e-107	-0.201301458153018	0.085	0.248	3.62375745488614e-103
BST1	2.22270865951038e-107	-0.203501205832806	0.078	0.237	5.37228683003659e-103
SNAPC2	2.65826838345848e-107	0.230313844118379	0.613	0.294	6.42503468281915e-103
CAMSAP2	2.82820698665836e-107	-0.298655273076584	0.232	0.429	6.83577628675326e-103
BCAR1	2.98843144384999e-107	0.296744761826718	0.811	0.524	7.22303879978542e-103
NAP1L5	3.42553898900514e-107	-0.149160206747945	0.046	0.182	8.27952773642543e-103
ALCAM	3.80943447709535e-107	-0.29955885771347	0.21	0.404	9.20740313113946e-103
PFDN1	4.93473746913753e-107	0.261703424629927	0.871	0.588	1.19272604629054e-102
CHD9	5.53337307357654e-107	-0.366836017458215	0.526	0.641	1.33741627188345e-102
GOLT1B	6.33057871873629e-107	0.216782903343044	0.531	0.218	1.53010087631856e-102
MECOM	7.71585195299686e-107	-0.357801380129173	0.434	0.587	1.86492141703934e-102
KLF11	7.82040840315337e-107	-0.207875425881496	0.089	0.255	1.89019271104217e-102
CLK4	1.07520932822427e-106	-0.161345607650505	0.051	0.19	2.59878094631807e-102
DDX18	1.18772453911763e-106	-0.3289974061047	0.689	0.751	2.87073021104732e-102
GDF6	1.80570050689791e-106	-0.12108061476411	0.024	0.134	4.36437812517225e-102
MYO1B	1.95141689580305e-106	0.176644644544216	0.218	0.002	4.71657463715596e-102
MRPS14	2.96043089903654e-106	0.259228167464262	0.8	0.514	7.15536148297133e-102
ADD3	4.09453100512368e-106	0.218588873671354	0.411	0.129	9.89648143938393e-102
TEX30	4.95145523421633e-106	0.211706277333908	0.391	0.116	1.19676673011009e-101
DHCR24	7.31193636689801e-106	0.204238547745113	0.259	0.026	1.76729501987925e-101
RBMS2	8.10778235839362e-106	-0.342974952399118	0.462	0.6	1.95965099602374e-101
TNPO1	9.63678716174515e-106	0.261450190917233	0.714	0.405	2.3292114569938e-101
XRCC6	9.69475425655023e-106	0.323631916457318	0.869	0.68	2.34322210380819e-101
OXLD1	1.34938641635013e-105	0.223012824283152	0.569	0.251	3.26146696831826e-101
AHNAK	1.54079195310247e-105	-0.303105136727796	0.819	0.84	3.72409415064868e-101
RAMP2-AS1	1.99254503996442e-105	-0.110998874073317	0.02	0.121	4.81598136159401e-101
ANAPC16	2.97932013496705e-105	-0.278490260596257	0.934	0.923	7.20101676621536e-101
[truncated: 2,860 more rows]
