# Supplementary material for: Transcriptional drifts associated with environmental changes in endothelial cells
Source: eLife. 2023 Mar 27;12:e81370. doi: 10.7554/eLife.81370 (PMC10168696; doi:10.7554/eLife.81370)
Supplement: Supplementary file 8. [file elife-81370-supp8.csv]

	p_val	avg_logFC	pct.1	pct.2	p_val_adj
MT2A	0	3.29712886246142	1	0.696	0
LGALS1	0	3.18153922906516	1	0.817	0
HMGA1	0	2.90225996333802	1	0.399	0
MMP1	0	2.50473480281984	0.96	0.004	0
FABP5	0	2.50085083235943	0.984	0.132	0
TFPI2	0	2.24587738890732	0.916	0.018	0
GPX1	0	2.04509271212008	1	0.909	0
PGF	0	1.89279078301555	0.858	0.005	0
GDF15	0	1.62066930842114	0.849	0.004	0
GNG11	0	1.59552503441876	1	0.961	0
RALA	0	1.53747255027072	0.988	0.469	0
UCHL1	0	1.49154582212681	0.913	0.033	0
ISG15	0	1.47645839715429	0.995	0.753	0
THBS1	0	1.4632960725964	0.983	0.508	0
MAP1B	0	1.32395818297494	0.91	0.089	0
HN1	0	1.30410456940058	0.984	0.614	0
KIAA0101	0	1.29149494610056	0.613	0.021	0
CTSC	0	1.26232537265126	0.908	0.115	0
PHLDA2	0	1.25322082683583	0.881	0.012	0
PTTG1	0	1.25256554100488	0.616	0.046	0
UBE2S	0	1.24553161941563	0.82	0.281	0
PRSS23	0	1.23562897213847	0.945	0.418	0
ENO1	0	1.21270067074079	0.998	0.882	0
TUBA1C	0	1.20835885253075	0.923	0.443	0
CKS2	0	1.20814071411119	0.706	0.2	0
AKAP12	0	1.20733603533962	0.875	0.361	0
EIF4EBP1	0	1.19926283925499	0.967	0.502	0
AP2S1	0	1.17310340464231	1	0.925	0
SERPINE1	0	1.17161231119834	0.986	0.886	0
BAX	0	1.14296824846381	0.993	0.626	0
C17orf89	0	1.13883378419718	0.975	0.507	0
ANXA2	0	1.13345143587424	1	0.995	0
MT1E	0	1.12993590834288	0.651	0.104	0
NME4	0	1.09729538618922	0.984	0.599	0
TUBB4B	0	1.09271350544504	0.947	0.624	0
GPX4	0	1.0598286400056	1	0.939	0
S100A16	0	1.05022113546178	1	0.976	0
PHPT1	0	1.04188339977975	0.994	0.773	0
SRPX	0	1.02776134517328	0.937	0.386	0
TYMS	0	1.02609118756253	0.63	0.014	0
SNRPB	0	1.02460732128846	0.987	0.754	0
ATP1B3	0	1.00817805123457	0.954	0.534	0
S100A6	0	0.994951977148096	1	1	0
S100A13	0	0.99109146750067	0.999	0.936	0
RAN	0	0.987141807141154	0.998	0.928	0
MRPL52	0	0.983756051187041	0.981	0.669	0
NQO1	0	0.977468377870736	0.739	0.063	0
RAC3	0	0.963131631970611	0.826	0.021	0
PFN1	0	0.948588674426291	1	1	0
ZFAS1	0	0.94733059142111	0.999	0.969	0
PLAUR	0	0.93983033020071	0.764	0.085	0
PKM	0	0.928879966273991	0.994	0.844	0
MZT2A	0	0.925942878354428	0.994	0.737	0
TUBA1A	0	0.919428494640029	0.975	0.849	0
CDKN1A	0	0.913230439483171	0.872	0.379	0
HHIP	0	0.910523984258832	0.667	0.145	0
CYBA	0	0.908998706683652	0.973	0.67	0
SVIP	0	0.908176689290452	0.92	0.52	0
PRELID1	0	0.903232974723734	0.997	0.863	0
MGST1	0	0.896596321115646	0.775	0.1	0
NME1	0	0.896567335497873	0.945	0.626	0
PXDN	0	0.888235929160058	0.783	0.051	0
C4orf48	0	0.875353261772974	0.994	0.819	0
IDH2	0	0.870120344109572	0.889	0.263	0
MRPL22	0	0.869494364700625	0.953	0.567	0
NUTF2	0	0.868579177651515	0.967	0.519	0
VAMP5	0	0.856641405465007	0.999	0.941	0
FOSL1	0	0.853216470923018	0.762	0.025	0
UPP1	0	0.844456906007315	0.843	0.159	0
PGAM1	0	0.844271227763594	0.988	0.813	0
UQCC2	0	0.824523076511977	0.929	0.472	0
TNFRSF12A	0	0.821485164798159	0.853	0.35	0
MRPL41	0	0.820919560518096	0.983	0.725	0
CARD8	0	0.820802183884166	0.922	0.509	0
PLP2	0	0.819737303908813	0.95	0.64	0
SPHK1	0	0.81713565739527	0.767	0.119	0
TPI1	0	0.802840431317101	1	0.985	0
SEC61G	0	0.800661451061809	0.999	0.917	0
ATP5J2	0	0.796445412295812	0.992	0.859	0
SOX4	0	0.786686513734673	0.982	0.767	0
IFI27	0	0.78044747109222	1	1	0
CFL1	0	0.773961747799214	1	0.999	0
PRDX1	0	0.772425510206194	0.997	0.943	0
SEC14L1	0	0.771182026166993	0.873	0.367	0
MRPL12	0	0.766678122368615	0.939	0.516	0
CTSB	0	0.759455492701616	0.969	0.613	0
ALDOA	0	0.7584894816326	1	0.992	0
ZMAT3	0	0.754076950881416	0.743	0.107	0
LSM7	0	0.753910552605041	0.987	0.767	0
MSMP	0	0.752744589156071	0.653	0.033	0
CHCHD10	0	0.752330171471233	0.805	0.191	0
SPOCD1	0	0.751704547448116	0.64	0.001	0
HEBP2	0	0.747747609675728	0.979	0.714	0
MYL6B	0	0.745609279494167	0.969	0.646	0
TMSB10	0	0.744718190812574	1	1	0
MRPL15	0	0.743386838719985	0.868	0.35	0
GSTP1	0	0.739623334823874	1	0.994	0
SH3BGRL3	0	0.738263631060299	1	0.997	0
PKIG	0	0.735703359377361	0.943	0.584	0
EIF5A	0	0.735164766430225	0.993	0.868	0
EIF2S2	0	0.734255347879728	0.996	0.91	0
CD93	0	0.732878698307309	0.907	0.458	0
FTL	0	0.731432572010098	1	1	0
CLEC14A	0	0.731330053918507	0.989	0.862	0
CD59	0	0.730932431366538	0.998	0.992	0
FAAP20	0	0.728565529804696	0.966	0.632	0
DYNLT1	0	0.728099374310188	0.988	0.791	0
TMEM256	0	0.725679688395505	0.977	0.704	0
PDLIM1	0	0.724937452007607	0.985	0.782	0
TPM2	0	0.723277315361301	0.999	0.933	0
PRSS3	0	0.720356956403547	0.524	0.002	0
MYDGF	0	0.718003244308776	0.989	0.811	0
ATP5G1	0	0.716274709715003	0.975	0.783	0
TSPO	0	0.713651848848881	1	0.994	0
TKT	0	0.712186151097723	0.97	0.709	0
ATP5B	0	0.710715226443384	0.986	0.831	0
MCAM	0	0.710562061705894	0.826	0.323	0
ADRM1	0	0.710413481420962	0.972	0.674	0
SLC25A6	0	0.707684848066959	1	0.998	0
COL4A2	0	0.706466483965915	0.719	0.061	0
AP1S1	0	0.705675659163845	0.911	0.468	0
TXNDC17	0	0.704152554708463	0.98	0.78	0
RGCC	0	0.704146618708394	0.612	0.02	0
SSR3	0	0.703776527538639	0.98	0.759	0
SLIRP	0	0.697569879888833	0.99	0.873	0
CSTB	0	0.695435821656322	0.997	0.934	0
RAB32	0	0.695091918209681	0.895	0.442	0
SMS	0	0.694064751242132	0.851	0.345	0
SLC25A5	0	0.693777076437047	0.997	0.936	0
GSTO1	0	0.693408090643229	0.992	0.888	0
IFI27L2	0	0.692060012757104	0.86	0.38	0
APLP2	0	0.68805258886376	0.989	0.876	0
GAPDH	0	0.684934034397635	1	1	0
ABRACL	0	0.68395787616657	0.872	0.378	0
CARD19	0	0.677956635718837	0.924	0.482	0
TIMM13	0	0.674473883496947	0.995	0.873	0
PSMA7	0	0.674443232481296	1	0.985	0
DEF8	0	0.673025212437652	0.848	0.321	0
NAMPT	0	0.671594787178482	0.891	0.446	0
CMTM7	0	0.669326875348823	0.742	0.109	0
CLIC1	0	0.669212992690512	0.998	0.961	0
CISD1	0	0.668074069790701	0.889	0.487	0
TPGS2	0	0.666600550866929	0.913	0.462	0
FDPS	0	0.666239089072363	0.952	0.708	0
ATP5G3	0	0.665388604305376	0.987	0.886	0
AKR1B1	0	0.664307011244308	0.806	0.279	0
LMNA	0	0.663373677961152	0.987	0.88	0
MPG	0	0.662999934681149	0.968	0.696	0
ANAPC11	0	0.661616213478781	0.994	0.892	0
CKAP4	0	0.660745025544454	0.843	0.372	0
C12orf75	0	0.660731676954086	0.594	0.046	0
PPP4C	0	0.660130028768048	0.959	0.664	0
GADD45GIP1	0	0.65842584347854	0.997	0.909	0
DBI	0	0.657551052856206	0.983	0.799	0
FUOM	0	0.650732155495206	0.731	0.097	0
PDCD5	0	0.649363076287715	0.975	0.817	0
CYC1	0	0.649087336899793	0.958	0.694	0
SNCA	0	0.647728541390263	0.894	0.463	0
NHP2	0	0.646716061430195	0.988	0.873	0
TXN	0	0.645955875416064	0.998	0.977	0
CCDC167	0	0.636306303050286	0.786	0.279	0
ITGA5	0	0.635368669274279	0.969	0.784	0
SEC61B	0	0.63485676788134	0.999	0.955	0
DDX21	0	0.634224323517222	0.929	0.654	0
DNPH1	0	0.632993442034556	0.857	0.385	0
NPM3	0	0.631892668725591	0.911	0.527	0
COX5A	0	0.630543619709263	0.998	0.936	0
TIMM10	0	0.623953489944933	0.884	0.459	0
COL4A1	0	0.623391800581963	0.644	0.051	0
ICAM2	0	0.622958888779319	0.992	0.9	0
PSMD8	0	0.622409694268363	0.969	0.743	0
AURKAIP1	0	0.619110066036819	0.987	0.845	0
KRT8	0	0.619026819179154	0.889	0.427	0
TUBB	0	0.618554416418931	0.999	0.994	0
DRAP1	0	0.617216622684274	0.972	0.744	0
UQCR11	0	0.61624737206929	1	0.985	0
POLR2L	0	0.615705461409183	1	0.989	0
MLLT11	0	0.615059036315081	0.677	0.103	0
PRDX5	0	0.6143959297842	0.997	0.917	0
RP11-350J20.12	0	0.614369018226028	0.658	0.136	0
APRT	0	0.613013646338996	0.996	0.918	0
COX8A	0	0.611525284300132	0.996	0.938	0
EIF1AY	0	0.610212889323024	0.616	0	0
GADD45A	0	0.602747704473601	0.762	0.259	0
UBE2L3	0	0.601397982682307	0.98	0.793	0
ARPC3	0	0.60127073247262	0.999	0.952	0
MBOAT7	0	0.599245770108489	0.805	0.27	0
OST4	0	0.599219381405391	1	0.998	0
SGK1	0	0.59841881340203	0.756	0.226	0
LSM4	0	0.597589954757702	0.936	0.643	0
USMG5	0	0.594416521492654	0.999	0.959	0
RHOC	0	0.592898003694377	1	0.977	0
PSMB2	0	0.590411346581706	0.946	0.69	0
NDUFS5	0	0.58858613534729	1	0.987	0
C4orf32	0	0.584782130835651	0.792	0.31	0
BID	0	0.583995339593605	0.75	0.198	0
MMP14	0	0.582859444367211	0.657	0.131	0
SMTN	0	0.58253014140242	0.635	0.075	0
HSPA8	0	0.582254329147643	0.994	0.949	0
ACTA2	0	0.581693886388136	0.641	0.051	0
ACTB	0	0.581589515922635	1	1	0
MRPL17	0	0.579358843145547	0.915	0.56	0
RER1	0	0.579241452797945	0.916	0.555	0
SYCE1L	0	0.576883016122246	0.684	0.127	0
SNRPF	0	0.574064725512466	0.977	0.855	0
ARPC2	0	0.573845677728686	0.999	0.982	0
STOML2	0	0.572111326309946	0.957	0.716	0
LDHB	0	0.571518018900291	0.997	0.97	0
MTCH2	0	0.571260334173681	0.852	0.443	0
UQCRQ	0	0.570053763558203	0.999	0.972	0
NDUFS8	0	0.569530821976241	0.98	0.804	0
ARL6IP4	0	0.566432016074297	0.999	0.969	0
MRPL28	0	0.563123840914645	0.914	0.527	0
HSBP1	0	0.562249408770295	0.99	0.869	0
COX6B1	0	0.561671777950412	0.999	0.979	0
NT5C	0	0.560647083100593	0.67	0.108	0
BNIP3	0	0.559665051360802	0.934	0.61	0
SCAND1	0	0.558160964053067	0.983	0.778	0
ATP5I	0	0.556907482958206	0.998	0.972	0
ATPIF1	0	0.555394207364581	0.993	0.913	0
LINC01013	0	0.554462174433091	0.553	0.004	0
CHCHD2	0	0.554103851118424	1	0.994	0
NDUFB1	0	0.552969468110108	0.986	0.846	0
BSG	0	0.551094506409685	0.994	0.91	0
UBL5	0	0.54990985489273	1	0.982	0
C1QBP	0	0.546112268657959	0.96	0.786	0
ARHGDIB	0	0.544078220997385	0.994	0.941	0
COTL1	0	0.54354658630064	0.719	0.195	0
NDUFS6	0	0.543305799988085	0.991	0.899	0
COPE	0	0.542840296753849	0.989	0.856	0
MDH2	0	0.541203544044049	0.97	0.77	0
TALDO1	0	0.53727659392419	0.969	0.786	0
SNAI1	0	0.536808598407658	0.541	0.009	0
DDT	0	0.534201001705172	0.985	0.827	0
C16orf74	0	0.534037653793747	0.546	0.023	0
CAV1	0	0.532051944761159	0.999	0.979	0
CCDC85B	0	0.529371522712185	1	0.99	0
COX7B	0	0.529035599659115	0.99	0.884	0
LAMC1	0	0.528502801867614	0.749	0.233	0
LINC00704	0	0.527247378251307	0.551	0	0
UQCRH	0	0.525298215346437	1	0.992	0
MARCH3	0	0.524597227030095	0.581	0.023	0
ATOX1	0	0.523208438781454	0.994	0.912	0
UBA52	0	0.520033234921101	1	1	0
SNF8	0	0.516210375562183	0.952	0.674	0
VEPH1	0	0.513841469586919	0.53	0.003	0
FAM213A	0	0.512169728666295	0.999	0.963	0
ATP5E	0	0.507546903165724	1	1	0
COX7A2	0	0.500052738670963	1	0.995	0
KDELR2	0	0.498987952744565	0.984	0.845	0
PRDX2	0	0.497722351357063	0.995	0.939	0
FTH1	0	0.491910712514456	1	1	0
TRAPPC1	0	0.489184530975767	0.982	0.835	0
OAZ1	0	0.488640207165963	1	0.999	0
PSMB5	0	0.483183069723327	0.996	0.939	0
PSMB7	0	0.48232677953824	0.988	0.894	0
UQCR10	0	0.480827404057865	0.985	0.873	0
SNRPE	0	0.478200037878831	0.996	0.941	0
CTXN1	0	0.473838673922616	0.545	0.028	0
MZT2B	0	0.472885468653627	0.999	0.988	0
C14orf2	0	0.472254931878981	0.999	0.969	0
MRPS21	0	0.471562302565493	0.994	0.938	0
TCEB2	0	0.464739043149749	1	0.99	0
NOP10	0	0.464110816213082	0.997	0.961	0
NDUFB7	0	0.453541773352047	0.995	0.915	0
HINT1	0	0.44788544850459	1	0.998	0
S100A11	0	0.447838200923995	1	0.994	0
NEDD8	0	0.447252438339735	0.999	0.976	0
MYL6	0	0.443846406944019	1	1	0
MYEOV2	0	0.440086673563431	0.996	0.952	0
C19orf53	0	0.440041140534119	0.998	0.956	0
PPIA	0	0.436993097222776	1	1	0
ATP5G2	0	0.408881540656174	1	0.999	0
SERF2	0	0.359728834887042	1	1	0
EEF1B2	0	0.35877148317519	1	0.999	0
TMA7	0	0.349136439177239	1	0.999	0
NKG7	0	-0.23876139905717	0	0.225	0
LYZ	0	-0.239906035730255	0.001	0.231	0
ANGPTL1	0	-0.25201156707185	0.005	0.229	0
KCNK15	0	-0.252060167672086	0.001	0.227	0
TYROBP	0	-0.261425918831854	0	0.25	0
CLEC3B	0	-0.26940551914405	0.001	0.255	0
SGCD	0	-0.278232128390148	0.009	0.264	0
SYT15	0	-0.287149182723671	0.02	0.29	0
IGKC	0	-0.292107612975207	0	0.277	0
AFAP1L2	0	-0.298624375351919	0.007	0.285	0
CD14	0	-0.299014111798189	0.006	0.252	0
MAATS1	0	-0.301246786167674	0.003	0.249	0
NOS1	0	-0.301507667442204	0.015	0.272	0
BMPER	0	-0.308935492629917	0.014	0.288	0
MPP7	0	-0.310544117850084	0.027	0.312	0
S1PR4	0	-0.310972324690623	0.023	0.304	0
DOC2B	0	-0.315641241209287	0.015	0.307	0
TNXB	0	-0.323151508093998	0.004	0.3	0
GNLY	0	-0.324274335702535	0	0.306	0
LINC01133	0	-0.325060835324806	0.008	0.278	0
FAM134B	0	-0.326920402274661	0.006	0.286	0
RNU12	0	-0.332153638256562	0.006	0.264	0
COL9A3	0	-0.332243934910829	0.01	0.269	0
LTB	0	-0.335858248066416	0.038	0.346	0
RP11-255M2.3	0	-0.336094097710449	0.017	0.334	0
PDZK1IP1	0	-0.336604163125924	0.019	0.321	0
CCDC3	0	-0.340706559219372	0.01	0.295	0
PLA1A	0	-0.355039084306838	0.028	0.321	0
PRR15	0	-0.359597379603375	0.01	0.329	0
NDRG2	0	-0.361290931554199	0.021	0.337	0
GFRA1	0	-0.367968332254035	0	0.297	0
SERTAD4	0	-0.372224854314559	0.053	0.373	0
AC131056.5	0	-0.377655676006129	0	0.352	0
AC104389.1	0	-0.380871459108904	0	0.35	0
EEF2	0	-0.392728283202874	1	1	0
RASL11B	0	-0.39548748912529	0.008	0.337	0
CD79B	0	-0.395958123502788	0.058	0.394	0
GLT8D2	0	-0.410115655932904	0.025	0.376	0
S100A4	0	-0.416843011580194	0.056	0.407	0
TMOD1	0	-0.429024212103458	0.036	0.403	0
TPGS1	0	-0.429294068513866	0.052	0.425	0
KLHL13	0	-0.432218090646478	0.083	0.439	0
ITM2A	0	-0.433606777583776	0.033	0.389	0
RASSF9	0	-0.434621821319676	0.022	0.399	0
LHX6	0	-0.436895330404	0.019	0.395	0
NFKBIZ	0	-0.443409860431476	0.07	0.426	0
RAB6B	0	-0.446717525791258	0.087	0.449	0
ITLN1	0	-0.447369764380587	0.003	0.307	0
IRAK3	0	-0.448954739772263	0.112	0.469	0
S100A8	0	-0.462675701199952	0	0.424	0
PGM5-AS1.1	0	-0.468783381001083	0.002	0.331	0
PLLP	0	-0.476883207669175	0.068	0.456	0
PCDH7	0	-0.486453493776789	0.125	0.495	0
KCNT2	0	-0.489696854645482	0.004	0.419	0
PTPRG	0	-0.494560159491936	0.108	0.489	0
HLA-DRA	0	-0.497692681536082	0	0.443	0
ST6GALNAC1	0	-0.498156114049127	0.045	0.456	0
MYL12B	0	-0.503517147298544	0.999	0.999	0
PLCB4	0	-0.503573582086115	0.027	0.458	0
CD52	0	-0.504801762358632	0.001	0.452	0
CDKN1C	0	-0.507809057679818	0.14	0.528	0
C1S	0	-0.50942483823647	0.012	0.435	0
OTC	0	-0.513986469127764	0.015	0.415	0
TGFB2	0	-0.518078628106413	0.004	0.447	0
H3F3B	0	-0.51848240509101	0.999	1	0
C2orf40	0	-0.521989490299508	0.005	0.427	0
IQCA1	0	-0.524974274885511	0.084	0.507	0
CSF2RB	0	-0.527922442330424	0.158	0.546	0
CPNE5	0	-0.529594033116862	0.131	0.55	0
CDA	0	-0.531295667515061	0.113	0.533	0
FAM167B	0	-0.540992209672817	0.121	0.524	0
CEBPB	0	-0.549921383258388	0.112	0.528	0
NACA2	0	-0.550450907754921	0.057	0.512	0
FAM107A	0	-0.552494174243897	0.038	0.475	0
PINK1	0	-0.555937081726231	0.196	0.604	0
SEC62	0	-0.558056934522246	0.919	0.975	0
CDH23	0	-0.561379985845188	0.002	0.481	0
AHSP	0	-0.561398234001544	0	0.44	0
CYBRD1	0	-0.566809027765939	0.197	0.597	0
CKB	0	-0.56967463151345	0.117	0.506	0
MDFIC	0	-0.569901015343622	0.068	0.526	0
NET1	0	-0.571086767030251	0.224	0.613	0
ACKR3	0	-0.572062666707512	0.082	0.511	0
CMKLR1	0	-0.574777280683651	0.007	0.486	0
CCNI	0	-0.578441407094739	0.992	0.997	0
HMCN1	0	-0.580739266178767	0.043	0.523	0
NUCB1	0	-0.582392679356552	0.803	0.916	0
TSPAN2	0	-0.58320447432647	0.036	0.498	0
CANX	0	-0.584032105595987	0.847	0.932	0
MEOX2	0	-0.584298163426537	0.023	0.494	0
TIMP1	0	-0.586726432208394	1	1	0
SBDS	0	-0.592262744606933	0.729	0.875	0
SFRP5	0	-0.595481472204128	0	0.437	0
CH17-189H20.1	0	-0.5973621367772	0.17	0.604	0
FN1	0	-0.599291431614254	0.997	0.999	0
RHOB	0	-0.602716663323342	0.953	0.99	0
SYNGR2	0	-0.60401080258131	0.78	0.914	0
GLRX5	0	-0.605259075751042	0.24	0.647	0
BMP6	0	-0.607249074497833	0.236	0.622	0
SULT1E1	0	-0.615755280974152	0.05	0.415	0
S100A10	0	-0.615897758363819	1	1	0
UBR3	0	-0.621875057794711	0.099	0.552	0
RSRP1	0	-0.621968371500141	0.25	0.654	0
ENTPD1	0	-0.623262664464211	0.224	0.641	0
RAPGEF5	0	-0.624106776804848	0.185	0.612	0
DSTN	0	-0.625117630992267	0.999	1	0
INMT	0	-0.626041313265784	0	0.432	0
CARD16	0	-0.627296810017072	0.471	0.782	0
ADGRA2	0	-0.628232747315255	0.162	0.626	0
CTTNBP2NL	0	-0.631201403057334	0.437	0.748	0
MALAT1	0	-0.640081327087112	1	1	0
ANKRD50	0	-0.642203817300189	0.261	0.637	0
TAX1BP1	0	-0.644434298617908	0.725	0.89	0
ALDH1A2	0	-0.645318264529211	0.124	0.579	0
TMTC1	0	-0.64841064170598	0.027	0.55	0
NPY	0	-0.651885914242094	0	0.395	0
STOM	0	-0.659655670689159	0.799	0.915	0
FSTL1	0	-0.660031916118965	0.77	0.901	0
WSB1	0	-0.660325297897299	0.856	0.959	0
IL13RA1	0	-0.660965492614654	0.373	0.727	0
BCAM	0	-0.662691534751983	0.544	0.805	0
PLSCR4	0	-0.664244808498856	0.34	0.741	0
STMN3	0	-0.665718355485879	0.085	0.613	0
GBP4	0	-0.669406031895944	0.13	0.599	0
TMBIM4	0	-0.670646519165511	0.645	0.877	0
EPB41L3	0	-0.673480774075907	0.506	0.804	0
FNBP1	0	-0.676330417096544	0.465	0.778	0
SERTAD4-AS1	0	-0.678164115284769	0.253	0.697	0
TNFSF10	0	-0.678376226577193	0.549	0.862	0
SCX	0	-0.679243657498436	0.037	0.58	0
SERPING1	0	-0.679971515137806	0.027	0.548	0
GLUL	0	-0.692388857975382	0.604	0.831	0
HLA-C	0	-0.700563309714222	0.906	0.984	0
ACKR4	0	-0.701873420080303	0.068	0.566	0
GJA5	0	-0.703266885067422	0.011	0.541	0
ADI1	0	-0.706013163713911	0.738	0.901	0
ALAS2	0	-0.708680211707539	0	0.544	0
GABARAPL1	0	-0.71332745411895	0.478	0.792	0
CDV3	0	-0.716525900907078	0.522	0.799	0
WWTR1	0	-0.717290928800137	0.939	0.984	0
ST8SIA6	0	-0.717941443556106	0.013	0.594	0
GDF7	0	-0.721924998896958	0.061	0.557	0
CIRBP	0	-0.722074928501428	0.97	0.998	0
COL23A1	0	-0.727995419518332	0.006	0.609	0
FOXP1	0	-0.728238006807628	0.729	0.892	0
CRIP2	0	-0.736634309811968	0.996	0.999	0
GMDS	0	-0.742397745034901	0.557	0.842	0
SELP	0	-0.744226360577914	0.072	0.638	0
CRIM1	0	-0.748921765089045	0.692	0.872	0
N4BP2L2	0	-0.750356665325549	0.63	0.887	0
NPEPPS	0	-0.752808081165611	0.426	0.8	0
GULP1	0	-0.759399572451882	0.187	0.686	0
HLA-DRB1	0	-0.761406371588311	0	0.607	0
HSPA2	0	-0.761824763743884	0.185	0.666	0
LEPR	0	-0.763804487750203	0.163	0.69	0
RBP1	0	-0.764654615979652	0.593	0.919	0
DDX17	0	-0.772555805389223	0.672	0.892	0
NUAK1	0	-0.774028713596105	0.338	0.771	0
ARL5A	0	-0.775104522234325	0.736	0.913	0
KIAA1462	0	-0.775673790129356	0.259	0.727	0
DDIT4	0	-0.778259557966317	0.706	0.894	0
KCTD12	0	-0.778450468426949	0.735	0.926	0
HIST1H1E	0	-0.787144639256227	0.108	0.66	0
BTG1	0	-0.788770144921692	0.869	0.964	0
PECAM1	0	-0.791497578789406	0.99	1	0
PGM5	0	-0.793601947658695	0.02	0.642	0
TACC1	0	-0.793629051064365	0.865	0.967	0
RND3	0	-0.794255369585785	0.272	0.7	0
YWHAH	0	-0.795672900905937	0.627	0.877	0
FXYD6	0	-0.803073064015279	0.474	0.875	0
ITSN2	0	-0.805528719219673	0.431	0.829	0
PGRMC2	0	-0.805730763558165	0.507	0.82	0
BMX	0	-0.807003063746936	0.824	0.941	0
PPIC	0	-0.8070493082779	0.739	0.919	0
S100A9	0	-0.808071727952556	0	0.672	0
IER3	0	-0.810522530009053	0.761	0.929	0
CYR61	0	-0.815623284872278	0.879	0.981	0
LYL1	0	-0.817393177247406	0.489	0.849	0
EIF4B	0	-0.819413296608942	0.886	0.975	0
MMP28	0	-0.825351930000488	0.151	0.73	0
RUNX1T1	0	-0.827194108727601	0.363	0.805	0
ADCY4	0	-0.829152285163613	0.233	0.759	0
FGD5-AS1	0	-0.829667612522459	0.441	0.823	0
ANKRD37	0	-0.831596209095934	0.165	0.68	0
LIFR	0	-0.832296891816342	0.159	0.696	0
CYYR1	0	-0.836102616594315	0.257	0.766	0
SKIL	0	-0.840435741639935	0.69	0.919	0
IL33	0	-0.842593173199444	0.156	0.714	0
ALDH2	0	-0.843637029427961	0.664	0.909	0
C1R	0	-0.849394199023976	0.032	0.625	0
TSPAN7	0	-0.856534627446051	0.366	0.775	0
LTBP3	0	-0.858368654723524	0.457	0.848	0
CCDC80	0	-0.858636971403536	0.243	0.692	0
NFIA	0	-0.861260824422118	0.46	0.824	0
FAM89B	0	-0.878259050887341	0.324	0.788	0
LMO2	0	-0.878399413936729	0.323	0.81	0
MMP2	0	-0.883915882603415	0.877	0.976	0
AC004540.4	0	-0.886467529269563	0.071	0.701	0
FBLN5	0	-0.888183280077469	0.051	0.69	0
HMGN3	0	-0.888573842063012	0.918	0.992	0
PABPC1	0	-0.890754463337033	1	1	0
HLA-E	0	-0.896965625344365	0.987	1	0
CTGF	0	-0.897500156412123	0.931	0.997	0
PCMTD1	0	-0.907332764225097	0.313	0.814	0
SYNE2	0	-0.907383945540635	0.23	0.772	0
SYNPO	0	-0.908153522230194	0.507	0.872	0
GUCY1A3	0	-0.908815160950084	0.023	0.693	0
KLF4	0	-0.909904115880101	0.339	0.817	0
LTBP4	0	-0.917645640066248	0.27	0.803	0
ANXA3	0	-0.919323455946345	0.443	0.856	0
FAM110D	0	-0.92605614294674	0.012	0.719	0
ITPR2	0	-0.937036406276052	0.417	0.865	0
ARL4A	0	-0.9392995029286	0.579	0.896	0
CPXM2	0	-0.942223683260402	0.152	0.774	0
FOSB	0	-0.943614135473407	0.114	0.704	0
RP11-160E2.6	0	-0.949897117545948	0.027	0.622	0
IER2	0	-0.95049701693364	0.94	0.972	0
EMP2	0	-0.953917280426515	0.527	0.917	0
BMPR2	0	-0.955771494338136	0.584	0.898	0
ARID5B	0	-0.956090663480882	0.26	0.744	0
NDRG1	0	-0.96227713358471	0.339	0.833	0
SULF2	0	-0.963053633643925	0.181	0.802	0
LMCD1	0	-0.967356708475381	0.321	0.835	0
ABLIM1	0	-0.968759196364585	0.39	0.847	0
PLPP3	0	-0.976218815298244	0.479	0.882	0
IGFBP3	0	-0.99269576241592	0.059	0.564	0
CDC42EP5	0	-0.996857536700445	0.182	0.806	0
ADGRG6	0	-0.998893680890332	0.269	0.846	0
NBEAL1	0	-1.00070469234938	0.699	0.956	0
RAB11FIP1	0	-1.00529911583422	0.099	0.744	0
ACKR1	0	-1.00821776372631	0.013	0.536	0
IFITM2	0	-1.01163424694867	0.995	1	0
SPARCL1	0	-1.01698698320412	0.002	0.551	0
IGFBP7	0	-1.01768567399399	0.992	0.999	0
RAB3C	0	-1.02088057714916	0.096	0.752	0
BRI3	0	-1.02391839609018	0.726	0.953	0
NPW	0	-1.02961578055334	0.328	0.763	0
NPDC1	0	-1.03565333101611	0.978	0.999	0
DKK3	0	-1.03753520567707	0.254	0.809	0
PTGS1	0	-1.05711071513012	0.338	0.859	0
NRG1	0	-1.06841091335541	0.199	0.791	0
ZFP36L2	0	-1.06992166491813	0.479	0.888	0
IGFBP4	0	-1.07336687863665	0.869	0.991	0
SPTAN1	0	-1.07479749023893	0.679	0.946	0
MPZL2	0	-1.07916910069677	0.334	0.89	0
LITAF	0	-1.08615097275514	0.649	0.952	0
ADIRF	0	-1.086620317043	0.893	0.991	0
FGF18	0	-1.09110188876295	0.039	0.75	0
PTPRB	0	-1.09254561064576	0.428	0.898	0
SDPR	0	-1.0939043383895	0.727	0.966	0
HTRA1	0	-1.09551396725892	0.509	0.918	0
PTTG1IP	0	-1.11444394305883	0.911	0.994	0
NUPR1	0	-1.11820285514278	0.141	0.803	0
IFITM1	0	-1.13237015117442	0.281	0.867	0
SERPINE2	0	-1.13442691126673	0.193	0.796	0
THBD	0	-1.14258117164653	0.254	0.822	0
PTMS	0	-1.14574316907569	0.928	0.996	0
CD34	0	-1.15235287302626	0.156	0.896	0
IFITM3	0	-1.15924667727905	1	1	0
VWF	0	-1.17170331095887	0.958	1	0
PALMD	0	-1.17223427057213	0.634	0.954	0
COL3A1	0	-1.18191384065862	0.315	0.888	0
PNRC1	0	-1.18691159573611	0.442	0.931	0
TGM2	0	-1.19059974240166	0.93	0.997	0
IL1R1	0	-1.21647783522726	0.095	0.849	0
LIMS2	0	-1.22718493446484	0.275	0.907	0
ZFP36	0	-1.24213543742132	0.181	0.822	0
HAPLN3	0	-1.244411287	0.39	0.939	0
SLC9A3R2	0	-1.25418696576856	0.401	0.927	0
PLVAP	0	-1.26822825547621	0.163	0.857	0
CALCRL	0	-1.3455116958381	0.785	0.989	0
BTG2	0	-1.35357071788175	0.257	0.908	0
SLCO2A1	0	-1.35708472477176	0.07	0.883	0
NNMT	0	-1.36206326053427	0.948	1	0
RNASE1	0	-1.37956780014725	0.987	1	0
CD74	0	-1.38630509177768	0.059	0.87	0
YBX3	0	-1.39031168045979	0.879	0.998	0
MATN2	0	-1.39081283988969	0.039	0.872	0
JUNB	0	-1.41966605389059	0.87	0.996	0
BMP4	0	-1.42289300485316	0.186	0.881	0
RAC1	0	-1.45583526851981	0.935	0.999	0
CYP1B1	0	-1.46864826611978	0.054	0.881	0
C10orf10	0	-1.48110062272478	0.251	0.859	0
PTGIS	0	-1.4824432585152	0.039	0.91	0
FBLN2	0	-1.48663922419358	0.027	0.884	0
SOCS3	0	-1.50379926102297	0.321	0.904	0
TSC22D3	0	-1.52868615839766	0.283	0.956	0
IGF2	0	-1.53446488178851	0.313	0.952	0
HEG1	0	-1.54908582264537	0.307	0.944	0
KLF2	0	-1.55507273368788	0.467	0.964	0
GAS6	0	-1.5698072372511	0.302	0.964	0
XIST	0	-1.57876957711354	0.005	0.929	0
OMD	0	-1.60234054692771	0	0.866	0
BGN	0	-1.62008864340621	0.937	1	0
ASS1	0	-1.67429103382126	0.213	0.968	0
SULF1	0	-1.75837553509354	0.381	0.991	0
LTBP2	0	-1.79817308973549	0.397	0.988	0
MGP	0	-1.80622928376396	0.999	1	0
LTC4S	0	-1.84659442404364	0.025	0.967	0
JUN	0	-1.86287769034129	0.755	0.995	0
RAMP3	0	-1.88764259668208	0	0.962	0
DCN	0	-1.93398036996262	0.204	0.92	0
CRTAC1	0	-2.00323596252322	0.067	0.95	0
DUSP1	0	-2.07955035774705	0.456	0.995	0
CXCL2	0	-2.11991748753666	0.082	0.919	0
HRCT1	0	-2.19292673811036	0.044	0.981	0
ABI3BP	0	-2.19315137555927	0.059	0.988	0
CEBPD	0	-2.21366731742486	0.072	0.976	0
RAMP2	0	-2.42343282051888	0.593	1	0
FOS	0	-2.45471329252072	0.101	0.989	0
TXNIP	0	-2.46579802474377	0.183	0.999	0
CLU	0	-2.48954480895949	0.918	1	0
AQP1	0	-2.59397754270335	0.211	1	0
CPE	0	-2.65519214879742	0.721	1	0
ELN	0	-3.08916890634564	0.011	0.999	0
POLR2J	6.58067245003195e-308	0.510531194309715	0.968	0.747	1.59054853117272e-303
UBE2I	8.73516469930898e-308	0.511235947649621	0.964	0.74	2.11128930782298e-303
GLTSCR2	1.2692281075931e-307	-0.420254982810932	0.995	0.997	3.06772433605253e-303
MYL12A	4.78603687116926e-307	0.449974770846663	1	0.999	1.15678511176161e-302
EIF4A2	2.90964886136324e-306	-0.471154069943596	0.974	0.987	7.03262129791494e-302
LYST	3.41790934410654e-306	-0.49120367723247	0.139	0.505	8.26108688470552e-302
CCNL1	3.81109854636917e-305	-0.641806049657589	0.507	0.774	9.21142518657428e-301
DDX5	2.67055793140713e-304	-0.483930635516671	0.977	0.989	6.45473852021102e-300
MIAT	5.58865913607625e-304	-0.235549062688058	0.004	0.216	1.35077891318963e-299
SNHG25	1.70137556279712e-302	0.502195092819357	0.643	0.123	4.11222473528064e-298
SNU13	7.23640695281574e-302	0.431772881112465	0.994	0.953	1.74903956049556e-297
RP11-286H15.1	1.16003522906156e-301	-0.218976549905768	0.002	0.208	2.80380514864179e-297
AXL	1.1790735816323e-301	0.574032317090787	0.51	0.012	2.84982084680526e-297
CCL23	2.68220050533508e-300	1.01126435958059	0.53	0.034	6.48287862139489e-296
TNS2	4.02413723045812e-300	-0.505129700779	0.189	0.565	9.72633968601727e-296
KCNN4	1.00272278009216e-299	-0.337800010785771	0.036	0.319	2.42358095948276e-295
PGLS	4.85396204566714e-299	0.55595510984177	0.968	0.757	1.17320262643775e-294
MAP4K4	5.97335984461212e-299	0.600355383788581	0.825	0.383	1.44376107444275e-294
CFH	9.98562339671094e-299	-0.628576229768542	0.284	0.651	2.41352517498504e-294
ARL4D	1.34251738896633e-298	-0.507629721935158	0.13	0.485	3.24486452913163e-294
MAML1	2.04398562955785e-298	-0.509534812386687	0.174	0.541	4.94031326664132e-294
SNRPD1	2.87531594664059e-298	0.55311650988892	0.975	0.845	6.94963864303031e-294
FGF2	3.98666148222555e-298	-0.362319073481538	0.059	0.369	9.63576080253915e-294
EVL	6.56803128122087e-298	-0.658775424578914	0.462	0.753	1.58749316067108e-293
IGF2BP3	1.74300711991553e-297	0.444149096561184	0.519	0.022	4.21284820883583e-293
C19orf48	2.0883227408667e-297	0.549375814473448	0.738	0.246	5.0474760646748e-293
ADGRL4	1.3198817117998e-296	0.550825284455292	0.92	0.61	3.19015409742011e-292
GSTM3	2.96271949043861e-295	0.571824094115131	0.84	0.408	7.16089300839011e-291
PHB	7.60646013322016e-295	0.518670750196294	0.947	0.743	1.83848141419931e-290
SOCS2	9.34935163858667e-295	-0.276594298975917	0.022	0.276	2.2597382910464e-290
GABARAPL2	2.01304385606801e-294	-0.483770214152611	0.914	0.952	4.86552700011639e-290
HOMER3	6.43092671857132e-294	0.664334661741539	0.867	0.463	1.55435498787869e-289
SLC25A3	1.09783763060904e-292	0.376487829585034	1	0.985	2.65347355318204e-288
UBTD1	1.53298221598795e-292	0.569799435420714	0.731	0.235	3.70521801604287e-288
C21orf33	3.01330504612855e-292	-0.247141097441032	0.011	0.239	7.2831582964927e-288
RNF187	3.48849246661828e-292	-0.520190561542214	0.249	0.619	8.43168629181638e-288
PREX2	5.87599704344873e-292	-0.547937316998661	0.238	0.604	1.42022848540156e-287
CLDN5	1.75770124015568e-291	0.825904957935081	0.951	0.732	4.24836389745628e-287
PLOD1	2.44592167580399e-291	0.515678292823533	0.737	0.241	5.91179269041825e-287
TRIOBP	3.29274024773872e-291	-0.589611898108026	0.699	0.865	7.9585531787845e-287
NRP1	3.55560234740968e-291	0.438144206503068	0.519	0.027	8.59389087368921e-287
DOK5	8.7078828385314e-291	-0.388779934637272	0.09	0.426	2.10469528207304e-286
PSIP1	1.06360038594343e-290	-0.58499687805235	0.391	0.719	2.57072213282527e-286
DLL1	1.42052187793782e-290	-0.359769538052137	0.055	0.361	3.43340137897571e-286
RBX1	3.17088020361303e-290	0.437188849517104	0.991	0.924	7.66401745213269e-286
ITLN2	3.88840516187481e-290	-0.214267556529219	0.001	0.196	9.39827527625142e-286
COL6A2	8.00753793519252e-289	-0.543787625977506	0.197	0.566	1.93542191893603e-284
CD37	2.74618034200054e-288	-0.19402092873371	0.001	0.191	6.63751788661531e-284
TRBC1	4.39873354508794e-288	-0.195694158915811	0	0.188	1.06317389784775e-283
PRDX4	7.14381615482268e-288	0.577958710117524	0.942	0.742	1.72666036462064e-283
BZW2	1.00443677553724e-287	0.512260115547345	0.754	0.26	2.42772368647351e-283
PHACTR2	1.15398076766455e-287	-0.622616380936943	0.609	0.821	2.78917151544523e-283
MRPL23	1.67945353832027e-287	0.498408197103769	0.761	0.273	4.0592392021201e-283
RNF125	1.99027507928883e-286	-0.298453473082926	0.024	0.276	4.81049486664111e-282
LSR	2.82186932801833e-286	-0.516927304360713	0.18	0.535	6.82045816582031e-282
FAM65B	3.77888253552119e-286	-0.236236252138372	0.007	0.218	9.13355908835471e-282
TUBA1B	3.94499439943337e-286	1.03780182472385	0.995	0.974	9.53505146343046e-282
CMTM3	4.54161311237125e-286	0.525502960717785	0.706	0.202	1.09770788926013e-281
HIF3A	1.78354817423004e-285	-0.451580659561469	0.127	0.482	4.31083593711401e-281
LRRC59	3.35903658001737e-285	0.533640448022161	0.797	0.35	8.11879141390198e-281
SPTBN1	3.48931220424364e-285	-0.543948458139093	0.819	0.924	8.43366759765689e-281
SLC2A3	6.46344832233975e-285	-0.718057367402193	0.204	0.556	1.56221545950952e-280
CRBN	1.00804302537943e-284	-0.588445298381135	0.446	0.736	2.43643999234209e-280
BLCAP	1.23828754690028e-284	-0.611183082964661	0.531	0.776	2.99294100085798e-280
RANBP1	1.54278915911838e-284	0.65380683972348	0.962	0.839	3.72892139758913e-280
RHOU	2.22269367648645e-284	-0.292155119745731	0.027	0.285	5.37225061606775e-280
ATP2A3	1.68827980515015e-283	-0.211708876643488	0.003	0.2	4.08057228904792e-279
TMEM141	4.03649701250193e-283	0.514586509395344	0.919	0.571	9.75621327921716e-279
AHNAK2	1.98454093152329e-282	-0.606010293909905	0.378	0.709	4.79663543149179e-278
CD99	2.26911074838814e-282	0.377071466192873	1	0.992	5.48444067885413e-278
JAM2	2.03873800113228e-281	-0.527069975255543	0.223	0.582	4.92762974873673e-277
GALNT10	1.10531280600576e-280	-0.45535800038838	0.148	0.499	2.67154105211592e-276
NDUFS7	4.48981588286296e-280	0.48277172511422	0.946	0.693	1.08518849888798e-275
KCNJ2	5.96675797358073e-280	-0.357187982304324	0.044	0.323	1.44216540221446e-275
CEP112	7.77028306710732e-280	-0.37819048685271	0.073	0.385	1.87807741731984e-275
LIMA1	7.96910807156601e-280	-0.575324408544182	0.612	0.83	1.92613342089751e-275
PFN2	1.4449842403285e-279	0.510430051636883	0.807	0.337	3.49252690887399e-275
HEY1	8.6292769803181e-279	0.684311243295439	0.467	0	2.08569624614288e-274
GALK1	1.7674084663191e-278	0.475950925361203	0.707	0.211	4.27182626309326e-274
IL6ST	6.81276847188273e-278	-0.56490881684916	0.734	0.878	1.64664613965406e-273
MRPL37	4.60238548134824e-277	0.50456239837199	0.885	0.508	1.11239657084187e-272
DESI1	5.00139233161441e-277	0.503882394905737	0.74	0.266	1.2088365265512e-272
CBX7	1.08089639230665e-276	-0.260693360663554	0.025	0.274	2.61252658020518e-272
EPB41L4A	2.31074611840202e-276	-0.467418669971149	0.167	0.519	5.58507336817768e-272
MLLT4	3.39975498740025e-276	-0.531370847005475	0.274	0.62	8.21720780454642e-272
LUC7L3	4.52737933605823e-276	-0.56028561194218	0.727	0.869	1.09426758552527e-271
RSPO3	7.23035941099368e-276	-0.602301784172689	0.266	0.616	1.74757786963717e-271
SEPT7	8.31589862840747e-276	-0.516980955262749	0.889	0.948	2.00995269848608e-271
PDCD7	2.04881377510827e-275	-0.460584269261056	0.166	0.514	4.95198289443669e-271
MPHOSPH8	2.57278008817946e-275	-0.558156868488364	0.608	0.814	6.21840947312975e-271
P4HA3	3.73303162014447e-275	0.464415962542133	0.519	0.04	9.02273742588918e-271
LRRC16A	3.74585226550027e-275	-0.417204712318793	0.109	0.443	9.05372492571414e-271
POLR2E	4.93136032180659e-275	0.483511202548484	0.937	0.676	1.19190978978065e-270
RDH13	4.95871768608887e-275	-0.44450536718227	0.122	0.462	1.19852206472768e-270
SNTB2	7.79428587538878e-275	-0.616615658763844	0.511	0.754	1.88387889608147e-270
EID1	8.21216897168192e-275	-0.402539787882989	0.989	0.994	1.98488124045552e-270
PA2G4	1.13746449752958e-274	0.560300971363521	0.96	0.823	2.74925169052899e-270
MMP24-AS1	5.06722543395205e-274	0.527813196681644	0.904	0.561	1.22474838738621e-269
PNP	5.13686375301174e-274	0.540922128948399	0.77	0.326	1.24157996910294e-269
CALD1	7.39708772212783e-274	-0.415343267629397	0.993	0.998	1.7878761024383e-269
FRMD4A	8.73957767687573e-274	0.456188113996035	0.558	0.075	2.11235592450086e-269
ZNF365	9.57808083066559e-274	-0.204195671580982	0.002	0.189	2.31502213677187e-269
MMRN2	9.85776725821029e-274	-0.582750305834191	0.656	0.831	2.38262234630943e-269
MAP1S	1.15310114426939e-273	0.439776633824988	0.618	0.118	2.78704546569911e-269
TRIP6	1.83391730223875e-273	0.488931047827934	0.716	0.23	4.43257811951107e-269
ARG2	7.32083834040398e-273	0.418202263995647	0.493	0.023	1.76944662687564e-268
COL1A2	2.52786353303887e-272	-0.645419827163407	0.244	0.588	6.10984615935496e-268
MKNK2	4.25944364851408e-272	-0.579914189092264	0.344	0.667	1.02950752984585e-267
SNRPG	4.66950209405299e-272	0.500418497224642	0.987	0.935	1.12861865613261e-267
RP11-262H14.3	5.89716686932566e-272	-0.191363411407461	0.002	0.186	1.42534523231601e-267
KMT2E	3.02695593478021e-271	-0.57878663896787	0.597	0.799	7.31615249436378e-267
NDUFV2	4.01542235113196e-271	0.468753383017359	0.968	0.783	9.70527582268594e-267
ART4	5.77690223361209e-271	-0.477472287811444	0.13	0.468	1.39627726986404e-266
PTMA	1.00454143697071e-270	-0.251749375073859	1	1	2.42797665315822e-266
FOXC1	1.07033495042466e-270	-0.590277173589855	0.341	0.666	2.58699957517639e-266
VAMP2	1.57932505002857e-270	-0.509184579864527	0.828	0.905	3.81722864591905e-266
SMIM4	4.09903522575605e-270	0.540452804819415	0.772	0.337	9.90736814065237e-266
VDAC1	3.05728018607549e-269	0.469206605065837	0.962	0.747	7.38944620974446e-265
SEC13	1.01256391487005e-268	0.504398528746178	0.888	0.54	2.4473669822409e-264
KRT1	1.84696530008276e-268	-0.183882670024305	0	0.176	4.46411513030003e-264
SSSCA1	2.94147007535162e-268	0.491719016487471	0.824	0.387	7.10953317212487e-264
PHLDA3	3.89263210018907e-268	0.479959152896991	0.614	0.127	9.40849178615699e-264
ZNF90	7.18759004508367e-268	-0.536542260615168	0.276	0.61	1.73724051389672e-263
MOB2	8.99134384177349e-268	-0.577100837337405	0.48	0.741	2.17320780655665e-263
ITM2B	1.09987272884378e-267	-0.448058378568356	0.986	0.998	2.65839238561541e-263
PSMB6	2.64235986437107e-266	0.460611343081585	0.979	0.871	6.38658379218487e-262
CCL14	7.62242639370494e-266	0.590137453891637	0.499	0.037	1.84234045935848e-261
RTN4	9.46538997689877e-266	0.481397195573482	0.976	0.857	2.28778475741643e-261
BEX2	1.8283753266291e-265	-0.303084377132613	0.036	0.298	4.41918316446255e-261
MIR99AHG	1.83987881919816e-265	-0.500502315192559	0.217	0.568	4.44698710600196e-261
DTYMK	3.56043995898057e-265	0.667457768685712	0.737	0.315	8.60558338085603e-261
GAMT	9.38041841029023e-265	0.515663002337423	0.746	0.295	2.26724712976715e-260
PRMT1	1.40088432735822e-264	0.519870959229249	0.93	0.668	3.38593741922481e-260
C19orf33	1.41468262176316e-264	-0.404180268331421	0.081	0.388	3.41928789680157e-260
PSMD5-AS1	1.42904634428056e-264	-0.350968913971325	0.074	0.374	3.45400501412612e-260
NDUFA1	3.23002304571487e-264	0.405682320945767	0.992	0.912	7.80696570149285e-260
PTGR1	3.4445764133708e-264	0.530984041586943	0.718	0.254	8.32554119111723e-260
PSMD7	3.78694971023506e-264	0.542111133544894	0.917	0.668	9.15305744963814e-260
MYLIP	7.41908913159549e-264	-0.505220704361806	0.214	0.56	1.79319384310663e-259
SLC4A7	7.6903478832185e-263	0.480928501691669	0.563	0.091	1.85875708337391e-258
HSPG2	4.03760490994633e-262	-0.393651925599266	0.994	0.999	9.75889106734027e-258
NTMT1	4.9926162978668e-262	0.490023907070799	0.769	0.313	1.20671535919441e-257
TTC19	8.80923723532487e-261	-0.544066632445925	0.345	0.659	2.12919263977802e-256
ATP5D	1.39583720280445e-260	0.363140527283461	0.998	0.973	3.37373851917836e-256
FAM207A	1.75922693326837e-260	0.475620935033976	0.782	0.339	4.25205149770964e-256
KANK3	8.82599489161954e-259	-0.533554593952597	0.255	0.598	2.13324296530444e-254
SLC44A2	4.76617548033658e-258	-0.565613357395106	0.458	0.73	1.15198461359735e-253
PURA	5.4921636375805e-258	-0.496259429642024	0.219	0.559	1.32745595120321e-253
PLXNA4	7.48069978310023e-258	-0.401853144856884	0.098	0.408	1.80808513757533e-253
TFPI	8.09534311076602e-258	-0.483079157209794	0.981	0.994	1.95664442987215e-253
COX5B	2.20178710026061e-257	0.332845164357637	1	0.986	5.3217194213299e-253
AGRN	4.49741778636779e-257	-0.540085939707361	0.302	0.635	1.08702587896509e-252
TMBIM1	8.30658613860173e-257	-0.573235355182327	0.436	0.711	2.00770186970004e-252
F2R	2.16483050977506e-256	0.493535304970375	0.774	0.318	5.23239534212631e-252
POMP	2.91097267784708e-256	0.411184690974602	0.992	0.929	7.0358209623564e-252
ATP6V1F	5.44837622186884e-256	0.409504890728086	0.991	0.92	1.3168725328257e-251
IL17RD	6.50877671515869e-256	-0.246237898419911	0.018	0.238	1.57317133205386e-251
NDUFB10	1.24830471175477e-255	0.40220464463694	0.99	0.897	3.01715248831127e-251
BNIP3L	3.65388470197356e-255	-0.512902077536284	0.814	0.9	8.83143932467009e-251
CHD3	8.57097680714452e-255	-0.568156078849566	0.372	0.67	2.07160509428683e-250
EPHA2	9.25363570539295e-255	0.450631569544178	0.614	0.141	2.23660374999348e-250
SERINC1	1.36975214530775e-254	-0.567881189573929	0.467	0.724	3.31069093520883e-250
C20orf27	5.75843925995852e-253	0.485830750924553	0.806	0.386	1.39181476913197e-248
PHF19	8.12744525652066e-253	0.600893248383543	0.552	0.1	1.96440351850104e-248
MKL2	1.66883550763388e-252	-0.437864502528063	0.143	0.476	4.03357542195108e-248
C7	1.68707832491746e-252	-0.287525057200413	0.021	0.247	4.07766831132551e-248
KTN1	1.7856966373581e-252	-0.451411030018443	0.938	0.966	4.31602877249452e-248
ADGRA1	2.50264061615389e-252	-0.169809367065179	0	0.165	6.04888236924394e-248
SLC7A11	3.69510595061809e-252	0.438856411755219	0.435	0.001	8.93107108264392e-248
PROCR	1.59853360713836e-251	-0.477754577380609	0.98	0.991	3.86365572845341e-247
H1FX	1.64213499152475e-251	-0.617635630636791	0.483	0.745	3.96904027451532e-247
RNF13	2.76328260282782e-251	-0.491638755148584	0.225	0.561	6.67885405103484e-247
H2AFZ	4.43799491830771e-251	0.928236840518614	0.992	0.949	1.07266337175497e-246
LPCAT2	6.20150154311531e-251	-0.546725921262687	0.355	0.663	1.49890292297097e-246
ITGA2	6.94030061025824e-251	0.505600508282968	0.625	0.165	1.67747065749942e-246
CBFA2T3	1.5884998389353e-250	-0.167651402282233	0.001	0.168	3.83940411070661e-246
TMEM120A	1.1644335199067e-249	-0.59337737226335	0.473	0.725	2.81443581761449e-245
PKNOX2	4.75476257219561e-248	-0.204334901336884	0.008	0.199	1.14922611369968e-243
PPP1CA	1.08679991490372e-247	0.443482414564286	0.949	0.744	2.62679539432229e-243
MORF4L1	2.18730564314414e-247	-0.371960296860546	0.991	0.994	5.28671773947939e-243
FAU	4.52169088534919e-247	0.214651329818839	1	1	1.0928926869889e-242
PFDN5	4.52572894136172e-247	-0.272427908175465	1	1	1.09386868512713e-242
ZNHIT1	4.80733492816862e-247	0.388549772886643	0.993	0.919	1.16193285213835e-242
PPP2R1A	7.50475257756518e-247	0.472333802654287	0.892	0.537	1.8138986979975e-242
ITPR1	1.05381123676946e-246	-0.333511329536592	0.062	0.339	2.54706175927179e-242
FXYD5	3.50968721358543e-246	-0.312566437779287	0.998	1	8.48291399523598e-242
PTK2B	4.62312468005926e-246	-0.233511347161343	0.019	0.236	1.11740923517032e-241
NTAN1	4.97040658622259e-246	0.475818279449634	0.932	0.663	1.20134727189e-241
SRI	6.97524395678863e-246	0.46501687318406	0.967	0.823	1.68591646435581e-241
UQCRB	7.22081413974975e-246	-0.316636681729981	0.999	1	1.74527077757752e-241
CFI	9.16196153539194e-246	-0.532333177675266	0.234	0.57	2.21444610310423e-241
ERH	1.0045378629617e-245	0.453621403202933	0.98	0.876	2.42796801477844e-241
MFGE8	2.25174237504499e-245	-0.537491387841973	0.351	0.657	5.44246132048374e-241
SEPW1	2.2798941741545e-245	0.411174677528163	0.996	0.944	5.51050421893142e-241
TK1	6.37685906377352e-245	0.776527821402188	0.474	0.044	1.54128683571406e-240
S100B	6.40948064308766e-245	-0.182985943252677	0.002	0.173	1.54917147143429e-240
MEGF6	1.08762397935575e-244	-0.42195465605756	0.139	0.461	2.62878715810284e-240
CD7	2.81621567694016e-244	-0.167588009771428	0.001	0.167	6.80679329116436e-240
ROMO1	8.99216447222009e-243	0.444594728058024	0.98	0.861	2.1734061529356e-238
ARPC4	1.57992686987241e-242	0.460166496701094	0.917	0.603	3.8186832444816e-238
PLPP1	1.40917952522344e-241	-0.440120519261296	0.17	0.494	3.40598691246504e-237
ZNF43	1.72685193613639e-241	-0.299539874311315	0.049	0.308	4.17380112964166e-237
FAM20A	2.48520007724872e-241	-0.170296767678758	0	0.158	6.00672858671015e-237
BIRC5	5.70572506297692e-241	0.864191604087899	0.435	0.012	1.37907374772152e-236
NPR1	1.13031837754342e-240	-0.511957251162222	0.293	0.621	2.73197951852244e-236
CDCA7L	1.66776172197574e-240	0.398560398304286	0.512	0.065	4.03098008201535e-236
FAXDC2	3.66245837366212e-240	-0.24067174021017	0.021	0.237	8.85216188914134e-236
FGR	1.04377917139734e-239	-0.167086321355748	0.001	0.163	2.52281425726738e-235
SPINT2	1.32627004141393e-239	-0.531367424808609	0.367	0.687	3.20559469009746e-235
NUDT1	1.7284963967645e-239	0.404806016678181	0.552	0.098	4.1777757909798e-235
CLDN11	1.86392045990303e-239	0.608742568923322	0.466	0.035	4.50509575158562e-235
HNRNPAB	1.93551934782082e-239	0.517701449249225	0.862	0.512	4.67815026368293e-235
STAT3	3.65335537455439e-239	-0.540343216942554	0.587	0.785	8.83015994029796e-235
PLSCR1	4.90451900198257e-239	-0.558423499014649	0.621	0.807	1.18542224277919e-234
CD55	1.42409920719749e-238	0.536278478983155	0.816	0.434	3.44204778379633e-234
EFEMP1	1.67987423639618e-238	-0.567970449610996	0.983	0.995	4.06025602936956e-234
RARRES3	4.02912265572519e-238	-0.423667291597206	0.164	0.5	9.73838945888779e-234
NES	1.37222348343827e-237	0.490256474156416	0.683	0.231	3.31666415947031e-233
CALCOCO2	1.4630174705577e-237	-0.530578235480695	0.367	0.661	3.53611322633796e-233
PGD	1.78148313634919e-237	0.449335047363058	0.758	0.321	4.30584474055598e-233
MRPS12	1.84742305293746e-237	0.452755991566529	0.879	0.541	4.46522151894985e-233
CCT7	4.617727359963e-236	0.478447351385535	0.923	0.673	1.11610470290306e-231
PPA1	7.55179178043321e-236	0.445990328325761	0.962	0.793	1.82526807333071e-231
GFER	7.56901540770079e-236	0.424297370122167	0.733	0.278	1.82943102404128e-231
AC004556.1	1.1068369712557e-235	0.335420992713399	0.414	0.001	2.67522495952502e-231
FILIP1L	1.23598145629145e-234	-0.618172328449192	0.329	0.634	2.98736717985644e-230
ITGA6	5.10521682869409e-234	0.406894790162936	0.503	0.061	1.23393090749536e-229
C12orf57	2.737883022219e-233	0.436178086983399	0.971	0.82	6.61746326470332e-229
COMMD6	7.8552282046378e-233	-0.329331745674482	0.998	0.999	1.89860865706096e-228
OLFML2A	1.81623875083167e-232	-0.194576888448721	0.007	0.183	4.38984906076014e-228
LCORL	2.35518221936037e-232	-0.438127014348212	0.169	0.486	5.69247542419401e-228
H2AFJ	2.70623074361534e-232	0.477903126859741	0.955	0.738	6.54095970731827e-228
PSMD2	4.26941518477297e-232	0.481295780357267	0.822	0.439	1.03191765015963e-227
CCT5	7.79880048064278e-231	0.532334339841741	0.878	0.584	1.88497007617136e-226
NRP2	9.00617566090453e-231	0.479734438069995	0.678	0.231	2.17679265724062e-226
GFOD1	1.47811872934994e-230	-0.460884472950325	0.223	0.549	3.5726129688388e-226
HIST1H1D	1.66002221394271e-230	-0.426776014066419	0.095	0.39	4.01227369109953e-226
P4HB	3.42855572292822e-230	0.389592553916338	0.991	0.904	8.28681918231752e-226
DAB2	1.54887910313899e-229	0.496653040212164	0.843	0.47	3.74364079228694e-225
HSD17B12	2.29145741394137e-229	-0.537876047497504	0.572	0.769	5.53845256949629e-225
CTHRC1	3.3808881427018e-229	0.486203337490458	0.409	0.003	8.17160664091025e-225
HMGB1	6.03821454131971e-229	0.602623095823156	0.998	0.989	1.45943645463697e-224
REXO2	7.27634312846684e-229	0.467354055690773	0.953	0.771	1.75869213415044e-224
PYCR1	8.20948347405583e-229	0.399243812191919	0.577	0.131	1.98423215567929e-224
EIF6	1.04958463740199e-228	0.443507715198938	0.935	0.688	2.53684606860061e-224
PTX3	1.09842951253176e-228	0.869619741906631	0.406	0.001	2.65490413178927e-224
UBE2C	1.41409820993517e-228	1.1778236926268	0.428	0.019	3.4178753734133e-224
RP11-382A20.3	8.01244935098592e-228	-0.536957506716354	0.587	0.76	1.9366090081333e-223
C19orf24	8.17693528172266e-228	0.448535992519146	0.886	0.553	1.97636525759237e-223
TSPAN6	1.32649381862951e-227	-0.533553072480155	0.508	0.74	3.20613555962751e-223
THAP5	3.37396536401139e-227	-0.350362661485413	0.088	0.373	8.15487428481552e-223
C10orf128	1.74668317128358e-226	-0.280294923943323	0.039	0.275	4.22173322499242e-222
STUB1	1.76919158581848e-226	0.406420975995194	0.966	0.809	4.27613606292327e-222
SPATC1L	1.82245313480509e-226	0.415766774868924	0.584	0.141	4.40486922682391e-222
SERPINB1	2.76570298459312e-226	-0.541172717580703	0.526	0.758	6.68470411376157e-222
FBXO34	5.3519236632781e-226	-0.403572016590176	0.116	0.414	1.29355994941432e-221
ZNF706	5.89276201364953e-226	0.418816648973828	0.972	0.81	1.42428057869909e-221
FAM195A	6.77724811106641e-226	0.403455772512944	0.616	0.172	1.63806086844475e-221
LYPLA1	1.80314994529955e-225	0.453311323157624	0.846	0.466	4.35821341778901e-221
UQCRC1	1.85930771825078e-225	0.456841446737915	0.863	0.525	4.49394675501214e-221
PDLIM2	4.1671641093669e-225	0.47692540870636	0.916	0.588	1.00720356523398e-220
PLXDC2	1.30147559562619e-224	-0.256780370965071	0.041	0.282	3.14566651462849e-220
ARPC1A	3.6379398781668e-224	0.410991860678297	0.973	0.822	8.79290068552915e-220
MRPS25	4.05500081225522e-224	0.44418470776672	0.799	0.405	9.80093696322086e-220
TGFB1I1	5.05149950447182e-224	0.471145259442118	0.853	0.498	1.22094743023084e-219
CHCHD1	9.4140744863556e-224	0.443901774591776	0.845	0.495	2.27538180335215e-219
SEC11C	1.18518433162654e-223	-0.513294291320954	0.394	0.666	2.86459052954135e-219
LGALS3	1.79445243875378e-223	-0.525736243711069	0.757	0.88	4.33719154446789e-219
PBX1	1.90940052334561e-223	-0.414288870154793	0.17	0.489	4.61502106492633e-219
ASH1L	2.92938125809427e-223	-0.463886246449048	0.235	0.547	7.08031450081386e-219
ATP8A1	3.28131145872072e-223	-0.21636574789113	0.019	0.221	7.93092979572799e-219
ARPC5L	6.87322134371059e-223	0.458500461796894	0.901	0.595	1.66125759877485e-218
GBP3	7.27340877907067e-223	-0.310825628321077	0.065	0.327	1.75798290190138e-218
DIXDC1	9.66501532640322e-223	-0.537231790746122	0.483	0.728	2.33603420439166e-218
SEPP1	1.3067957261099e-222	-0.316554877881477	0.065	0.334	3.15852527000763e-218
CENPW	1.88416403948887e-222	0.817234361936744	0.561	0.162	4.5540244834446e-218
TNS1	2.13173949849786e-222	-0.44692144350977	0.212	0.531	5.15241436786933e-218
PNISR	2.37885756713084e-222	-0.467890420287486	0.801	0.877	5.74969873975523e-218
CYCS	5.24566151742242e-222	0.532974561285794	0.891	0.626	1.267876388761e-217
HMGA2	6.9991004438603e-222	0.407656167450667	0.466	0.05	1.69168257728103e-217
SHFM1	9.38620694265508e-222	0.334998402131316	0.997	0.964	2.26864621803973e-217
BOLA3	1.05541372797878e-221	0.480359463513266	0.811	0.455	2.55093498052471e-217
ADAMTS9	1.19212203463149e-221	0.406276141531062	0.476	0.057	2.88135895770431e-217
COPS8	1.65800886773171e-221	0.461407144497508	0.85	0.49	4.00740743330754e-217
CTSO	1.81302868282135e-221	-0.34650426279827	0.094	0.379	4.3820903263792e-217
PEA15	1.8485291292672e-221	-0.51109786963308	0.675	0.824	4.46789490543882e-217
EEF1D	2.1521143183494e-221	-0.242558160256334	1	1	5.20166030745051e-217
TUBB6	2.22014277627291e-221	0.527900928573426	0.938	0.78	5.36608509025163e-217
RBM39	4.17832975753161e-221	-0.417777577487396	0.933	0.955	1.00990230239539e-216
LHFP	4.6678454218205e-221	-0.473699547049736	0.284	0.598	1.12821823845401e-216
CTU1	9.75594239309171e-221	-0.188956481970361	0.014	0.203	2.35801127641027e-216
CBX3	9.92082225200837e-221	0.436101577017724	0.928	0.669	2.39786273831042e-216
CREG1	1.62745852924467e-220	-0.401483839649677	0.156	0.465	3.93356726518437e-216
MRPS15	1.68631178066241e-220	0.420826398211092	0.937	0.698	4.07581557386103e-216
LYPD2	2.82508733213745e-220	-0.200998422761322	0	0.145	6.82823608177622e-216
HMGN1	3.10924229905037e-220	0.362755694887079	0.995	0.955	7.51503863680475e-216
POLR2F	5.19805654972677e-220	0.425577020511402	0.957	0.81	1.25637026806896e-215
EIF5B	1.32084082264147e-219	0.456005340244716	0.966	0.829	3.19247226832443e-215
TLK1	2.30527294720405e-219	-0.470885010244821	0.286	0.592	5.57184471339219e-215
TMEM59	1.27330982607996e-218	-0.454945978778255	0.884	0.939	3.07758984963526e-214
FGFR3	1.55943738221029e-218	-0.233100147833509	0.022	0.227	3.76916015280227e-214
GNB2L1	1.72155298480528e-218	0.227478196291274	1	1	4.16099356427437e-214
HSPA12B	1.79898354335261e-218	-0.408792826089535	0.14	0.444	4.34814322428327e-214
RP11-983P16.4	2.15299358663024e-218	-0.217270567493929	0.022	0.226	5.20378549888529e-214
AIF1	2.61058438714053e-218	-0.159430495171831	0.002	0.155	6.30978246371865e-214
RAC2	3.93324213770056e-218	0.398538378228714	0.557	0.119	9.50664624682225e-214
NDUFAB1	8.24346217883888e-218	0.401179106753381	0.969	0.834	1.99244480862536e-213
BAZ2B	1.00683676429855e-217	-0.514841323553903	0.33	0.62	2.4335244593096e-213
ESM1	1.53894876229896e-217	0.464093345081001	0.405	0.01	3.71963915847659e-213
RP11-14N7.2	1.86238626762706e-217	0.414042169546319	0.657	0.216	4.50138760885459e-213
RP11-1223D19.1	2.25908932598966e-217	-0.196182462593046	0.016	0.206	5.460218900917e-213
DYSF	4.89751508768216e-217	0.359928861914225	0.411	0.015	1.18372939669278e-212
ID2	5.86830332319713e-217	-0.637536651843692	0.695	0.9	1.41836891321675e-212
GRK5	6.9950089395277e-217	-0.484633642749475	0.321	0.622	1.69069366068385e-212
ECHS1	8.66102980856752e-217	0.44007044905804	0.913	0.622	2.09337090473077e-212
SSR4	2.97741451791262e-216	0.31692686456872	1	0.993	7.19641088979481e-212
ADGRG1	4.71610914657227e-216	0.344333594514392	0.419	0.019	1.13988358072652e-211
LAPTM4A	4.78148087393372e-216	-0.413030948193167	0.967	0.984	1.15568392722978e-211
FAM84B	5.64831321476306e-216	-0.402181593019464	0.142	0.444	1.36519730400823e-211
HMGB3	9.49697029534107e-216	0.470289646132725	0.623	0.194	2.29541772038394e-211
GIMAP4	1.59475503865416e-215	0.526909766480405	0.923	0.671	3.8545229284271e-211
GARS	1.60485666588076e-215	0.451290351259656	0.714	0.296	3.8789385614338e-211
GAL	1.75078089152168e-215	0.417244556207793	0.391	0.003	4.23163741480789e-211
ARL6IP5	2.25626978271854e-215	-0.463047427935861	0.901	0.932	5.4534040648307e-211
DHRS3	2.37671725926905e-215	-0.501268945622667	0.272	0.587	5.7445256156533e-211
IFI6	7.65001127326183e-215	0.858434964541948	0.946	0.819	1.84900772474738e-210
HSPA1B	1.03495882724117e-214	-0.284086002709451	0.041	0.271	2.5014954854419e-210
NOSTRIN	4.56367921850709e-214	-0.198147193742212	0.004	0.162	1.10304126711316e-209
DDX3X	7.0403138609511e-214	-0.516753153419741	0.577	0.76	1.70164386019188e-209
TSHZ2	8.14635011367159e-214	-0.183116928110392	0.004	0.158	1.96897282247442e-209
NUCB2	1.35476243571342e-213	-0.496106911396683	0.676	0.833	3.27446080711935e-209
TMOD3	1.36351949415445e-213	-0.488671176776304	0.732	0.832	3.29562661737131e-209
CHCHD7	2.83722082902609e-213	0.403248544903072	0.683	0.24	6.85756274375606e-209
CTSF	4.70565071534698e-213	-0.438699880173619	0.21	0.52	1.13735577789937e-208
SUMO2	1.06265374508896e-212	0.287345444892811	0.999	0.989	2.56843410188002e-208
CHURC1	1.87307967882651e-212	-0.467430200224638	0.74	0.85	4.52723358372367e-208
FDXR	3.68854406364043e-212	0.372040539838218	0.472	0.062	8.91521100181891e-208
VSTM4	1.20842924587425e-211	-0.203378780445997	0.018	0.208	2.92077348727807e-207
CNBP	2.31018332395938e-211	-0.422057087095295	0.91	0.938	5.58371309400983e-207
PABPC3	3.24462619362659e-211	-0.180887174184463	0.009	0.18	7.84226150999548e-207
EIF3I	5.35268689765297e-211	0.402711043072468	0.967	0.826	1.29374442316272e-206
TPBG	7.14597866425316e-211	-0.373532424151836	0.106	0.389	1.72718304314999e-206
PTPN13	7.71155289851739e-211	-0.251560718090552	0.03	0.243	1.86388233557165e-206
NR2F2	9.68981562969579e-211	-0.470165262171519	0.923	0.95	2.34202843769747e-206
MRPS7	2.64264020530551e-210	0.420074371748971	0.832	0.462	6.38726137622342e-206
GADD45B	3.12997635905173e-210	-0.619444508180756	0.738	0.885	7.56515285982804e-206
HNRNPA1	3.24851231114908e-210	-0.286784932068274	1	1	7.85165425604733e-206
PPIB	3.62778079998287e-210	0.383917869753768	0.997	0.959	8.76834619355859e-206
PERP	1.35251835571573e-209	0.430606861702623	0.737	0.312	3.26903686576493e-205
MEF2A	1.8813620806822e-209	-0.514941543072108	0.374	0.645	4.54725214900887e-205
SELM	2.76109875820273e-209	-0.419581082597132	0.878	0.942	6.67357569857601e-205
XAF1	4.39041514373784e-209	-0.436045203470827	0.214	0.529	1.06116334024144e-204
UROS	6.01764852610295e-209	0.396985653256236	0.697	0.268	1.45446564875908e-204
TLE1	9.01410539623962e-209	-0.48059770898594	0.315	0.605	2.17870927427112e-204
TMEM255B	1.72414863773309e-208	0.426928797739546	0.869	0.524	4.16726725740089e-204
SLC8A1	1.87611078804373e-208	-0.153810352938546	0.003	0.15	4.53455977470169e-204
ATP5L	2.1995958512135e-208	0.271451853660001	1	0.998	5.31642317238304e-204
FIBP	5.90976905223018e-208	0.408028717571617	0.92	0.665	1.42839117992403e-203
NR3C1	6.72848060313888e-208	-0.457854324858877	0.265	0.568	1.62627376177867e-203
FMOD	8.70880343235248e-208	-0.186227602418762	0.009	0.175	2.10491778959959e-203
SOX17	1.85062992844483e-207	0.409552402427704	0.379	0.002	4.47297253705116e-203
TPR	3.35670305075667e-207	-0.46861508512622	0.773	0.875	8.11315127367887e-203
LOXL2	6.31110908732707e-207	0.359736698756108	0.497	0.083	1.52539506640695e-202
PTRF	7.84622101470138e-207	-0.317295730802763	0.997	0.999	1.89643161925332e-202
CITED4	1.16090020905112e-206	-0.355515878532099	0.084	0.35	2.80589580527656e-202
ACOT7	3.56157927648791e-206	0.401562157940574	0.597	0.172	8.60833711127129e-202
ERP29	5.61479245405695e-206	-0.39591824204588	0.928	0.957	1.35709533614556e-201
DYNLL1	1.08526307357631e-205	-0.324454521763123	0.995	0.998	2.62308084883394e-201
CD3D	1.09263661384242e-205	-0.141893658532853	0	0.136	2.64090269565714e-201
TMED9	1.47093551564695e-204	0.400371350632998	0.983	0.864	3.55525114131867e-200
UBL3	1.52781437153153e-204	-0.387883783658086	0.168	0.467	3.6927273359917e-200
DCUN1D5	1.56543229468219e-204	0.409908866803373	0.706	0.289	3.78364985624686e-200
BPTF	1.61749805569665e-204	-0.500204238686992	0.509	0.714	3.9094928006188e-200
PFDN2	4.09943077332174e-204	0.410009150354376	0.971	0.855	9.90832417911866e-200
MT1X	4.21903676228642e-204	0.535264518443078	0.635	0.228	1.01974118544463e-199
BCL2L12	8.9964228773004e-204	0.41421017549862	0.566	0.152	2.17443540944351e-199
IAH1	3.02432413159023e-203	0.399975062506598	0.703	0.277	7.30979142605359e-199
EXOC6	4.27122937834005e-203	-0.495189688662674	0.513	0.73	1.03235614074479e-198
TIMM50	9.3927708591519e-203	0.401362217982958	0.705	0.296	2.27023271665701e-198
NDUFA3	1.32597830846793e-202	0.393310725508482	0.962	0.817	3.20488957156699e-198
TRIM56	1.54885226708937e-202	-0.484636653291219	0.326	0.61	3.74357592955501e-198
TM4SF18	1.96011110811725e-202	0.397984045945215	0.452	0.056	4.73758854831939e-198
COMMD4	2.57120667015786e-202	0.401775549336413	0.773	0.372	6.21460652177155e-198
RGS10	5.71595755812412e-202	0.365911093977285	0.505	0.097	1.3815469417986e-197
GBE1	7.6092915071759e-202	0.360557981951442	0.499	0.087	1.83916575728442e-197
MRPL4	2.09116210797069e-201	0.42097382844781	0.813	0.45	5.05433881496516e-197
HSD17B11	2.44613320287545e-201	-0.496661580750101	0.416	0.676	5.91230395134997e-197
VPS13A	3.08310769265524e-201	-0.416112459659801	0.202	0.501	7.45187129314771e-197
ACTG1	4.33081760613058e-201	0.291377142865576	1	1	1.04675861540176e-196
ADAMTS4	5.0523111635285e-201	0.403018822471125	0.428	0.042	1.22114360822484e-196
CRYBB2	6.85891322044683e-201	-0.160239234065939	0.004	0.154	1.657799325382e-196
STIM2	8.2316387345255e-201	-0.365499579772443	0.131	0.416	1.98958708213481e-196
LDLRAD4	1.26171782687331e-200	-0.320511273868808	0.088	0.353	3.04957198755279e-196
ANPEP	3.21099905601017e-200	0.367001392368759	0.479	0.079	7.76098471837659e-196
PHB2	6.76970436315857e-200	0.392619189626004	0.949	0.732	1.63623754457543e-195
TNFAIP8L3	1.20713098532644e-199	0.303718211495381	0.364	0	2.91763559153402e-195
NGFRAP1	1.76975807796893e-199	0.328886171313789	0.998	0.977	4.27750527445091e-195
NNAT	2.18374273609065e-199	0.40052995588114	0.419	0.035	5.27810619313109e-195
ARGLU1	8.68788358382881e-199	-0.432204545327434	0.846	0.908	2.09986146221142e-194
RNF181	1.53005908868101e-198	0.386424355488128	0.982	0.867	3.698152817342e-194
MTHFD2	3.31895576322964e-198	0.405689593052339	0.572	0.161	8.02191607972605e-194
LINC00657	4.26076893488787e-198	-0.483270130312567	0.716	0.814	1.0298278515624e-193
TSPAN5	5.44267996716072e-197	0.37977174723702	0.553	0.14	1.31549574806275e-192
HGS	6.98073328847116e-197	0.363446389441489	0.627	0.203	1.68724323582348e-192
PFDN6	7.86983127623907e-197	0.413269832697172	0.725	0.326	1.90213821946698e-192
FNIP2	1.51597298490501e-196	-0.355220802509464	0.129	0.411	3.66410670451541e-192
MIR4435-2HG	1.75077405172747e-196	0.450852265084393	0.808	0.446	4.2316208830253e-192
IL32	2.1593942814493e-196	0.626426294603905	0.898	0.655	5.21925597826297e-192
NINJ2	5.47402547648839e-196	-0.204965313698752	0.024	0.215	1.32307195766724e-191
LINC00694	7.41082988836841e-196	-0.161534422645377	0.005	0.154	1.79119758401864e-191
JUP	7.85093932333881e-196	0.399416723076097	0.625	0.21	1.89757203445099e-191
NKTR	1.28027642126859e-195	-0.500402873823081	0.47	0.693	3.09442811020617e-191
SCAF11	2.96046197727136e-195	-0.461219676900291	0.75	0.842	7.15543659906487e-191
TUFM	5.75777349078638e-195	0.382453717407643	0.965	0.826	1.39165385272307e-190
CKLF	5.99385620352638e-195	0.479520405920264	0.843	0.53	1.44871504439233e-190
TMEM205	7.78488897135767e-195	-0.463511168595604	0.732	0.84	1.88160766437715e-190
TSPAN13	8.06340530826919e-195	0.332174459043866	0.371	0.008	1.94892506300866e-190
PITPNA	1.34607599098184e-194	-0.461512572356584	0.355	0.623	3.25346567020311e-190
ERCC1	4.76557769249838e-194	0.39993507741879	0.838	0.476	1.15184012827686e-189
CDK4	5.70319921732361e-194	0.444931267751298	0.853	0.551	1.37846325082712e-189
OSTF1	1.62223701353587e-193	0.372102001699996	0.649	0.224	3.92094686171619e-189
TRIB3	1.74378445690526e-193	0.319675916614923	0.385	0.017	4.21472703234001e-189
APLNR	4.20911469043909e-193	-0.153742065385371	0.001	0.132	1.01734302067913e-188
FCER1G	9.81418345122413e-193	-0.182593496650365	0.013	0.181	2.37208814016087e-188
SCN3B	1.72622545611764e-192	-0.301316000205217	0.082	0.337	4.17228692743634e-188
TSC22D4	2.03061107193273e-192	0.407043410674358	0.665	0.251	4.90798696086142e-188
PROS1	3.14383090756475e-192	-0.346595740569237	0.123	0.401	7.598639303584e-188
STXBP6	3.92232259945352e-192	-0.192245484118141	0.011	0.174	9.48025372287915e-188
KDR	2.02990450497211e-191	0.345570972527072	0.362	0.005	4.90627918851759e-187
NYNRIN	4.99009758761419e-191	-0.397511316138254	0.198	0.491	1.20610658692635e-186
CTB-178M22.2	8.70757200778116e-191	-0.156989560024734	0.008	0.16	2.10462015428071e-186
FLI1	1.65027948490707e-190	-0.484827431822899	0.501	0.71	3.98872551502039e-186
MBNL2	4.76711011261047e-190	-0.451699759329057	0.319	0.589	1.15221051421795e-185
MORF4L2	5.61278713668564e-190	0.406675346541161	0.945	0.766	1.35661065093692e-185
SMDT1	1.02878524927074e-189	-0.385254871832685	0.94	0.948	2.48657394748739e-185
NFKBIA	2.39423718809057e-189	-0.517862622448517	0.858	0.92	5.7868712836149e-185
GNAI2	3.37424028108961e-189	0.348380387778489	0.997	0.966	8.15553875939358e-185
RDX	1.44559762920534e-188	0.440004104516241	0.948	0.752	3.49400946978931e-184
ZNF581	2.91854645245188e-188	0.457816061554097	0.833	0.477	7.05412677557621e-184
ZDHHC12	3.03447106818002e-188	0.406138843967044	0.785	0.41	7.3343165717911e-184
TWF2	4.12117605925865e-188	0.404724023356481	0.78	0.398	9.96088253522815e-184
PDGFD	5.58372299078681e-188	-0.20014809855384	0.022	0.205	1.34958584687317e-183
VKORC1	5.98877447794277e-188	0.342336056809401	0.985	0.91	1.44748679131877e-183
CDON	6.01961584089981e-188	-0.187253281399727	0.015	0.184	1.45494114874548e-183
IGF1R	1.3394980375159e-187	-0.426554529499344	0.207	0.49	3.23756675667593e-183
TIMM17A	1.80957465748239e-187	0.40764943752217	0.752	0.371	4.37374194713493e-183
CCND3	2.30697846564415e-187	-0.466238099557262	0.399	0.653	5.5759669514619e-183
ORAI2	3.68821399891233e-187	0.387943030980505	0.668	0.26	8.9144132353711e-183
C7orf73	8.00381781693165e-187	0.401929876008019	0.864	0.557	1.93452276635238e-182
ATOH8	1.06217089416361e-186	0.373823319341748	0.432	0.056	2.56726705119344e-182
WDR18	1.30537014185036e-186	0.390083866399059	0.709	0.314	3.15507963285231e-182
PAICS	1.57957401331667e-186	0.419123362898258	0.684	0.294	3.8178303901864e-182
HMOX1	1.74820512173207e-186	0.419563490762581	0.397	0.033	4.22541177922641e-182
H2AFV	1.95020428621381e-186	0.470277886927962	0.924	0.73	4.71364375977877e-182
SNHG19	2.20594444667938e-186	0.494897434646533	0.699	0.322	5.33176772762405e-182
ZNF708	3.33846174470645e-186	-0.222757543743363	0.033	0.233	8.06906203695549e-182
BCKDK	5.36773318205299e-186	0.384425441172814	0.761	0.371	1.29738111010221e-181
RRM2	4.84935537872777e-185	0.62474563450861	0.353	0.007	1.1720891950385e-180
NMB	1.11902328004524e-184	0.382255792545183	0.642	0.236	2.70467926786934e-180
HHIP-AS1	1.53879452253889e-184	0.468579063994147	0.693	0.315	3.7192663609765e-180
NAV1	4.27381089648627e-184	0.322745853471789	0.463	0.08	1.03298009368073e-179
AP1B1	5.1291815728349e-184	0.348017914483776	0.524	0.13	1.23972318615419e-179
GINM1	5.20211184002494e-184	-0.467020833187844	0.671	0.784	1.25735043173403e-179
HAGHL	5.27298221975077e-184	0.279706867133824	0.359	0.009	1.27447980251376e-179
PSMD14	6.77880457802234e-184	0.428305831389616	0.738	0.374	1.638437066508e-179
YWHAQ	2.21863974641363e-183	0.371620365936917	0.958	0.786	5.36245226708175e-179
ZNF638	2.81041373760025e-183	-0.407843045450247	0.223	0.508	6.79277000377981e-179
C9orf3	3.89282851043762e-183	-0.407875057287083	0.209	0.489	9.40896650972774e-179
ASRGL1	4.73321326408346e-183	-0.466190757594139	0.678	0.806	1.14401764592897e-178
FSCN1	6.71275699739509e-183	0.429052914237505	0.945	0.717	1.62247336627039e-178
DPM3	6.93225145081525e-183	0.396037439490667	0.866	0.559	1.67552517566205e-178
ZNF302	8.89602073565933e-183	-0.3081977251095	0.093	0.346	2.15016821180886e-178
PRKCZ	9.03244214879123e-183	-0.224405949828138	0.039	0.245	2.18314126736284e-178
ASNA1	1.46223644765064e-182	0.387118732428053	0.782	0.42	3.53422549397159e-178
RP13-1039J1.2	2.34297743365589e-182	-0.194831096723814	0.021	0.198	5.66297645714628e-178
C11orf58	3.17125119814072e-182	-0.380807476487522	0.909	0.927	7.66491414590613e-178
GCC2	4.34671693967434e-182	-0.476643448557681	0.401	0.648	1.05060148431929e-177
SLC16A4	5.66996956237237e-182	-0.242398114187462	0.047	0.262	1.3704316432254e-177
GPBP1	1.24502587575457e-181	-0.458987688203205	0.448	0.664	3.0092275416988e-177
ZNF781	1.35935479178753e-181	-0.168396886582201	0.016	0.182	3.28556053175046e-177
C2orf88	1.59336715076145e-181	-0.190773544633151	0.021	0.199	3.85116840339042e-177
RELL1	3.14730961625778e-181	-0.38614286411951	0.171	0.445	7.60704734249505e-177
SF3B6	3.30956720687803e-181	0.352235401677352	0.984	0.905	7.99922393902419e-177
BDNF	3.50461015810135e-181	-0.30686416781153	0.055	0.276	8.47064275213096e-177
SAP30	6.47457719191602e-181	-0.255153811729317	0.066	0.298	1.5649053072861e-176
EPAS1	7.93876349178289e-181	-0.432296788805922	0.794	0.872	1.91879913596392e-176
MRPL57	8.34773358048349e-181	0.373920377602633	0.961	0.819	2.01764720640286e-176
YIF1A	1.13748524096718e-180	0.384027325999167	0.917	0.682	2.74930182741766e-176
TRIAP1	1.13829899048376e-180	0.385753155651028	0.735	0.356	2.75126865999925e-176
ARHGAP22	1.54559545296812e-180	0.278939231905919	0.347	0.005	3.73570420982395e-176
NUSAP1	1.63477050583704e-180	0.645160613362371	0.353	0.011	3.95124031260812e-176
COX6C	1.7181880677645e-180	0.286407721969665	0.998	0.977	4.15286055978679e-176
TPD52	2.98486199314594e-180	-0.383161180683992	0.199	0.485	7.21441143743373e-176
B9D1	3.68956398673861e-180	0.308085032628116	0.476	0.091	8.91767615594722e-176
MESDC1	3.92851804988478e-180	-0.46871633305002	0.413	0.648	9.49522812657152e-176
TMEM208	6.87362074566514e-180	0.390621320832752	0.769	0.4	1.66135413422727e-175
COPS6	7.73346452111639e-180	0.391777136170618	0.935	0.731	1.86917837475383e-175
CSDE1	1.2377492932426e-179	-0.382112098481886	0.921	0.934	2.99164004176736e-175
SIK2	1.56392688451209e-179	-0.277787381709046	0.071	0.307	3.78001127986572e-175
ITGB4	1.82294226342859e-179	-0.430767734410724	0.348	0.632	4.40605145070691e-175
CCT4	3.38940127662052e-179	0.396847327825487	0.931	0.709	8.19218288559179e-175
FADS2	6.14300580988037e-179	0.298242694589437	0.362	0.017	1.48476450424809e-174
CCPG1	7.05615392032619e-179	-0.49889057441544	0.483	0.7	1.70547240254284e-174
GABRB3	1.45810969828478e-178	-0.136156970461989	0.001	0.125	3.5242511407543e-174
CLIC2	3.7971680865406e-178	-0.371658902869903	0.166	0.442	9.17775526516862e-174
PPCS	4.62665285672999e-178	-0.437994512435689	0.445	0.677	1.11826199547164e-173
AAMDC	3.01355414452292e-177	-0.402727792688961	0.859	0.909	7.2837603673119e-173
TNFSF15	7.55019463342692e-177	0.332537390640689	0.361	0.018	1.82488204289929e-172
RAB34	1.27527239481989e-176	0.408746813961084	0.743	0.363	3.08233337827967e-172
SNRNP25	1.69685733047391e-176	0.390055236305422	0.682	0.303	4.10130416775544e-172
FAM49A	2.0108390026148e-176	0.285187829028772	0.376	0.029	4.86019786931997e-172
NDUFB8	3.43829342152017e-176	0.347228915462115	0.982	0.901	8.31035519981424e-172
TPX2	4.82371182582791e-176	0.500965164455268	0.343	0.009	1.16589114830261e-171
APOA1BP	4.8326692250836e-176	0.449945540019529	0.931	0.706	1.16805615170271e-171
CCDC102A	5.49409669183888e-176	-0.211766592972443	0.031	0.219	1.32792317041746e-171
CMPK1	5.57642707248485e-176	-0.444018456844958	0.607	0.763	1.34782242341959e-171
CASC4	6.76003910550185e-176	-0.435460217772746	0.286	0.55	1.6339014517998e-171
MRPL36	1.28596186678868e-175	0.393362814270518	0.899	0.659	3.10816983202825e-171
PSMD13	1.51875131759466e-175	0.39205700810094	0.865	0.561	3.67082193462629e-171
PDCD4	1.55339429139226e-175	-0.46878230381338	0.339	0.601	3.7545540022951e-171
ETV5	2.30734031696612e-175	0.262988906469799	0.364	0.019	5.57684154610711e-171
TBCA	2.37100361599747e-175	0.306893120680681	0.992	0.931	5.73071573986587e-171
AFF1	1.3612322554649e-174	-0.346768900819764	0.154	0.427	3.29009836145866e-170
RP5-1172A22.1	1.55597919339054e-174	-0.126038109383762	0.002	0.124	3.76080171042493e-170
SQLE	3.31582458205293e-174	0.400724850783286	0.493	0.122	8.01434801482194e-170
SOX2	3.94383481908234e-174	-0.162708950383967	0.005	0.139	9.53224875772203e-170
RFK	4.32864303973888e-174	-0.495171092190368	0.694	0.794	1.04623302270489e-169
RNF7	4.56253661947421e-174	0.365229328544155	0.978	0.866	1.10276510092692e-169
NFIX	1.23987225800142e-173	-0.370195592825444	0.175	0.449	2.99677124758943e-169
MRAS	1.58053024220547e-173	-0.506835049464969	0.233	0.499	3.82014159541062e-169
TMED3	2.7354126575338e-173	0.372217619513944	0.941	0.727	6.61149239325919e-169
UBE2T	3.08916149393167e-173	0.526416663812472	0.391	0.047	7.46650333083285e-169
BST2	6.68426146713377e-173	-0.346176812660699	0.94	0.994	1.61558599660623e-168
TCN2	7.08910387461761e-173	-0.462252890148826	0.476	0.7	1.71343640649508e-168
KNOP1	7.38770221039305e-173	0.36952676674691	0.691	0.3	1.785607624252e-168
DMD	1.50241597212941e-172	-0.197644539014372	0.029	0.212	3.63133940463679e-168
TEK	1.53675988698768e-172	-0.455092116434529	0.438	0.661	3.71434864684922e-168
MRPS34	2.52764413317313e-172	0.377640282056555	0.915	0.683	6.10931586987945e-168
RP3-510D11.2	3.60376047290515e-172	0.290701532069629	0.326	0.001	8.71028906301175e-168
HOXB4	1.31913179169932e-171	-0.355787767422674	0.146	0.41	3.18834154053726e-167
EVI5	6.27372226211402e-171	-0.446700517358624	0.37	0.613	1.51635867075296e-166
ANXA6	8.20538257875991e-171	0.361917354430752	0.726	0.341	1.98324096928627e-166
MAGEH1	1.1338129189347e-170	-0.469041138158254	0.382	0.621	2.74042582506517e-166
ZMIZ1	1.13576989663925e-170	-0.369163052631117	0.184	0.453	2.74515584017707e-166
EMC8	3.2987680726431e-170	0.364816552371027	0.752	0.377	7.97312243157837e-166
SF3B5	4.87491415531904e-170	0.308148909812108	0.99	0.926	1.17826675134061e-165
FKBP1C	6.12876730720909e-170	-0.171162396094347	0.019	0.184	1.48132305815244e-165
AURKB	1.28965846854296e-169	0.563956859458471	0.333	0.008	3.11710451846834e-165
YPEL3	2.94454206299373e-169	-0.438794632369321	0.57	0.754	7.11695816625585e-165
CAMK1D	3.14949164974691e-169	-0.20163251769952	0.032	0.218	7.61232131743828e-165
WISP2	4.97666372901421e-169	-0.122606006599049	0	0.112	1.20285962330273e-164
ETV4	9.4723371501705e-169	0.2485003157272	0.321	0.001	2.28946388919621e-164
IFI44L	1.07444844479783e-168	-0.472103620686711	0.487	0.764	2.59694189107635e-164
HP1BP3	1.53254644974477e-168	-0.410030617190442	0.737	0.834	3.7041647690331e-164
TOMM5	2.22021522865216e-168	0.415391249237828	0.741	0.407	5.36626020765227e-164
ADD1	2.47643373929079e-168	-0.458560577607366	0.529	0.711	5.98554034786583e-164
KLF3	2.71584647112045e-168	-0.479030335376836	0.644	0.78	6.56420092069812e-164
PTRH1	3.27665235345787e-168	0.355843569644114	0.68	0.29	7.91966873830768e-164
CAP1	5.38467367354093e-168	0.389353873164233	0.904	0.679	1.30147562689484e-163
TUBB2A	8.22838312597598e-168	0.334385821799592	0.512	0.133	1.98880020154839e-163
SAT1	9.58449630586385e-168	0.506909510861202	0.974	0.867	2.31657275712729e-163
PHF3	1.06026675622891e-167	-0.402118855935293	0.232	0.504	2.56266474980529e-163
COX7A1	1.27268990763062e-167	-0.412435919271769	0.782	0.897	3.07609150674321e-163
CALM3	1.44962046344958e-167	0.365511586193286	0.95	0.798	3.50373266015763e-163
DDX3Y	2.93914526306833e-167	0.254023548025958	0.317	0	7.10391410083615e-163
LXN	3.46862041507214e-167	0.624465335997336	0.843	0.564	8.38365554322935e-163
EIF3E	5.75322320812153e-167	-0.290263274545292	0.997	0.996	1.39055404940297e-162
RP11-736K20.5	9.86008603696307e-167	0.300949298521385	0.452	0.087	2.38318279513398e-162
TMEM189	1.28071202453016e-166	0.365388699675393	0.75	0.38	3.0954809632894e-162
CENPN	1.612540763015e-166	0.346220760329761	0.419	0.068	3.89751102420726e-162
GMFG	3.02915328232877e-166	0.443030767193101	0.51	0.151	7.32146348338865e-162
EFNB1	3.78386916767947e-166	0.288638595836034	0.342	0.016	9.14561177828129e-162
CDC42EP3	5.55896393883812e-166	-0.504265344335628	0.639	0.785	1.34360158401717e-161
DPEP2	7.64771557461463e-166	-0.140305045884007	0.007	0.142	1.84845285438436e-161
UFC1	1.56723505876664e-165	-0.34875607646251	0.937	0.948	3.78800713703896e-161
ANKRD12	1.71704894020156e-165	-0.443824883000593	0.509	0.691	4.15010728846717e-161
ACTN1	4.84000560451789e-165	-0.367520813486569	0.959	0.968	1.16982935461197e-160
ZDHHC24	5.64028001180137e-165	0.372982058411771	0.767	0.409	1.36325567885239e-160
TRIB2	1.22635496324316e-164	-0.303050187379569	0.101	0.342	2.96409994615871e-160
CSNK2B	1.62151767445364e-164	0.335402097505726	0.979	0.867	3.91920821915445e-160
KRAS	2.55051764803474e-164	-0.462432916072367	0.514	0.69	6.16460115529997e-160
PON2	2.9683646860607e-164	-0.460704292119798	0.703	0.82	7.17453744620872e-160
TFPT	1.34912465874052e-163	0.36522980427915	0.683	0.308	3.26083430017584e-159
EVA1A	1.53103412125084e-163	0.262371888822466	0.336	0.014	3.70050947106328e-159
HSP90AA1	2.11183371589104e-163	0.433907841303332	0.994	0.974	5.10430209130864e-159
TIMM8B	2.34542110774837e-163	0.382726616321116	0.926	0.764	5.66888281742781e-159
HSPE1	2.37291884076125e-163	0.467583419438411	0.951	0.869	5.73534483811994e-159
NAA38	2.4751085050914e-163	0.329715259266954	0.985	0.904	5.98233725680592e-159
TOP2A	3.01721310958973e-163	0.818420088165989	0.332	0.016	7.29260408587837e-159
NRGN	3.86337793045336e-163	0.352351929825734	0.579	0.209	9.33778445790576e-159
MCL1	8.66641995951414e-163	-0.434690752514912	0.758	0.828	2.09467370421457e-158
IGLC2	8.75573605227039e-163	-0.109367889157774	0	0.108	2.11626140383375e-158
PRC1	1.07594048868348e-162	0.529689162868718	0.353	0.03	2.60054816114797e-158
TM4SF1	1.50551724175608e-162	0.374486220450367	0.999	0.984	3.63883517332445e-158
ARHGAP24	1.78343190793406e-162	0.26367340694115	0.34	0.018	4.31055492147663e-158
GLMP	2.31217592735112e-162	0.352331751402989	0.685	0.307	5.58852921640765e-158
RHOBTB3	2.3189526673355e-162	0.260924734168925	0.365	0.033	5.60490859694991e-158
CDH11	2.75136340887079e-162	-0.403057753156278	0.209	0.476	6.6500453592407e-158
PLAC9	7.65039582715905e-162	-0.477058172466198	0.453	0.698	1.84910067142434e-157
ZSCAN18	8.93452766376451e-162	-0.345738893648699	0.147	0.403	2.15947533633188e-157
TLN2	1.28915398409786e-161	-0.163944096309627	0.012	0.156	3.11588517956452e-157
NDUFV1	1.39993164161301e-161	0.357103318791938	0.851	0.545	3.38363477777865e-157
P4HA2	1.67204589029008e-161	0.291680830018359	0.452	0.091	4.04133491683113e-157
FNDC4	2.08983583800941e-161	0.271905075218013	0.398	0.055	5.05113322046875e-157
LINC00152	5.74217400829311e-161	0.42729531030507	0.848	0.576	1.38788345780444e-156
CCNB1	6.43371044780282e-161	0.568689562040254	0.354	0.032	1.55502781523394e-156
LINC01235	1.27905841918785e-160	0.385146728559487	0.308	0.001	3.09148419917702e-156
CAPZA1	1.36069385835302e-160	0.392428627654518	0.811	0.463	3.28879705563926e-156
CENPM	1.53165782123241e-160	0.313402012904671	0.315	0.005	3.70201695391874e-156
HIPK3	1.61621395129796e-160	-0.351892341026456	0.182	0.447	3.90638912028718e-156
JUND	1.96545808946747e-160	-0.498608050973385	0.521	0.694	4.75051220224289e-156
CD63	2.33576892104917e-160	0.321854786468729	1	0.999	5.64555348217586e-156
TP53I3	6.4149032808284e-160	0.378777367973145	0.665	0.3	1.55048212297622e-155
CLEC2B	1.36672614617591e-159	0.332858762882822	0.411	0.072	3.30337709530718e-155
TNIP1	3.22734666546249e-159	-0.423410738003089	0.497	0.699	7.80049689042284e-155
ACOT9	3.58537322163984e-159	0.335431209953806	0.617	0.241	8.66584707670348e-155
SH3GL1	4.80840354186435e-159	0.345397754694228	0.734	0.354	1.16219113606861e-154
MCFD2	6.35105724286699e-159	0.379060523030739	0.808	0.49	1.53505053560095e-154
CD81	6.4564923590006e-159	-0.422214598722229	0.82	0.867	1.56053420317045e-154
TMA16	6.53497345198132e-159	0.357018568356901	0.696	0.324	1.57950308334388e-154
PFKP	9.97904217741834e-159	0.36739675555797	0.797	0.458	2.41193449428201e-154
TROVE2	1.03251170764913e-158	-0.430730972154208	0.455	0.66	2.49558079738795e-154
C16orf13	1.05458756060075e-158	0.338456257649764	0.955	0.797	2.54893813397202e-154
XPA	1.21192043180065e-158	-0.40278757676764	0.292	0.552	2.92921168366216e-154
TRIP11	1.40544542153613e-158	-0.431940497088943	0.327	0.567	3.39696158385283e-154
MAD2L1	1.70093030175851e-158	0.369942831985819	0.322	0.011	4.11114853935032e-154
JPH4	3.82372396253774e-158	-0.128430807520475	0.003	0.118	9.24194081745371e-154
CFDP1	4.18823769499832e-158	0.405946027620426	0.858	0.608	1.01229705088109e-153
HERC2	5.02014079802009e-158	-0.478472413706659	0.423	0.634	1.21336803088146e-153
CLK1	5.2263554785569e-158	-0.31664301189235	0.128	0.376	1.2632101191672e-153
NOS1AP	8.00778215028006e-158	-0.168436534468143	0.018	0.17	1.93548094572269e-153
N4BP2L1	9.37975779242552e-158	-0.203363383054589	0.034	0.215	2.26708745842925e-153
DDA1	1.62241508796578e-157	0.347111304827782	0.713	0.343	3.9213772676133e-153
SAMD9	1.84931554757764e-157	-0.275565372449574	0.079	0.304	4.46979567849516e-153
IFIT1B	1.90280472863077e-157	-0.120839303791893	0	0.105	4.59907902910057e-153
HSPB8	2.69935978383891e-157	-0.178878836542342	0.022	0.183	6.52435259753865e-153
RP11-793H13.3	4.7439843047884e-157	-0.123121048867182	0.001	0.111	1.14662100646736e-152
ACADVL	4.83069381928487e-157	0.353508176482104	0.79	0.436	1.16757869612115e-152
GRHPR	6.75407016701427e-157	0.345906411669652	0.913	0.67	1.63245875936735e-152
ATP2B1	7.94114250144469e-157	-0.402591482891688	0.233	0.492	1.91937414259918e-152
FKBP1A	7.99708802723258e-157	-0.199740818313241	1	1	1.93289617618211e-152
RTCA	1.19548252174983e-156	0.312274151139173	0.596	0.219	2.88948125506934e-152
CENPF	1.25594224514857e-156	0.673780207709843	0.329	0.02	3.03561240652409e-152
SRA1	2.56329424686394e-156	0.349760427911255	0.728	0.368	6.19548219467015e-152
VASP	7.68396248967376e-156	0.36079648779022	0.737	0.369	1.85721373375415e-151
THNSL2	1.27193162514114e-155	-0.125501938357809	0.004	0.12	3.07425873796613e-151
LINC00493	1.38181397656324e-155	-0.347884453620896	0.924	0.93	3.33984438135335e-151
NPC2	1.52283859705213e-155	0.341259294762083	0.99	0.917	3.680700889075e-151
TRAP1	2.74384399892069e-155	0.334024048954291	0.632	0.259	6.6318709453913e-151
APOL1	3.17521689211167e-155	-0.334289259153314	0.163	0.421	7.67449922823391e-151
ZNF423	3.3086186478037e-155	-0.236954045520955	0.066	0.28	7.99693127174154e-151
TGFBR3	4.11527187985367e-155	-0.241193028230901	0.06	0.269	9.94661213360631e-151
IFNAR1	5.22997179185201e-155	-0.436161312237616	0.418	0.63	1.26408418209063e-150
GTF2H5	5.76333772136729e-155	0.357819818009204	0.858	0.555	1.39299872725447e-150
C16orf45	6.27218201262431e-155	-0.403320819145452	0.333	0.585	1.51598639245129e-150
NDUFA4	9.50388731051833e-155	0.259507456931274	0.999	0.991	2.29708956295228e-150
CMTM6	1.11874831357174e-154	0.352816685269293	0.751	0.387	2.70401467390288e-150
S100A12	1.58356382620882e-154	-0.102128925978077	0	0.102	3.82747376794671e-150
RP5-855D21.1	1.71420443807766e-154	-0.127094038203761	0.009	0.141	4.14323212683369e-150
CISD3	1.74968403310285e-154	0.355059577030499	0.737	0.391	4.2289863080096e-150
CDKN3	2.07855732730237e-154	0.462482294054014	0.334	0.024	5.02387306008983e-150
TLR5	2.44802360005983e-154	-0.133898561335564	0.008	0.136	5.9168730413446e-150
RUVBL2	3.006522256531e-154	0.363464592176664	0.733	0.382	7.26676429403542e-150
TSC22D1	3.04408585103026e-154	-0.543855621064543	0.423	0.633	7.35755550194014e-150
FADS1	3.05187682599429e-154	0.335102264057256	0.556	0.19	7.37638628842821e-150
SLC38A1	6.07736226834546e-154	0.249941589338167	0.318	0.011	1.4688984602591e-149
KLHL20	6.27339288406483e-154	-0.386489051899282	0.219	0.476	1.51627906007847e-149
ITGB1	6.49129266895408e-154	0.325096306933548	0.988	0.947	1.5689454380862e-149
SLC22A17	7.55762393768092e-154	-0.239718905437442	0.072	0.288	1.82667770573748e-149
MKI67	9.1836057095113e-154	0.625070103704892	0.32	0.016	2.21967749998888e-149
GTSE1	9.76963300353187e-154	0.471049179205123	0.308	0.008	2.36132029695365e-149
RNASEH2C	1.19630406742785e-153	0.3334594917823	0.947	0.786	2.89146693097312e-149
ENDOD1	1.59856545056704e-153	-0.322223598153511	0.144	0.394	3.86373269402053e-149
FASN	1.70303873903381e-153	0.287798084213357	0.412	0.074	4.11624463224472e-149
UGP2	1.74925192348564e-153	-0.428065654914193	0.597	0.744	4.22794189906479e-149
NEAT1	1.76594440000553e-153	0.722468827510692	0.992	0.987	4.26828761481336e-149
BASP1	2.37718276456641e-153	0.356299918544535	0.633	0.263	5.74565074195701e-149
WWC2	2.4047042999897e-153	-0.353457481739622	0.187	0.444	5.81217029307512e-149
CREB5	2.51255124751122e-153	-0.317754252996365	0.122	0.363	6.07283636523463e-149
CUEDC2	9.13275978788138e-153	0.350569217867988	0.874	0.606	2.20738804073093e-148
GGH	1.07914963555432e-152	0.315931912341761	0.368	0.045	2.60830466913479e-148
PGK1	1.57553231635391e-152	0.378200968837138	0.95	0.806	3.80806160862741e-148
PDGFB	1.82438427769253e-152	0.335644256322923	0.463	0.119	4.40953679918285e-148
DNAJB4	2.12660160178764e-152	-0.453096574552588	0.474	0.672	5.13999607152071e-148
RAI14	2.30101231533216e-152	0.378955248632452	0.893	0.657	5.56154676615783e-148
SLC4A1	2.37453720090742e-152	-0.130963679297233	0.001	0.105	5.73925641459324e-148
LSAMP	2.86812013957058e-152	-0.134764569282328	0.008	0.134	6.93224637734209e-148
RAB5C	3.77493145079366e-152	0.303235848619096	0.98	0.899	9.12400931656826e-148
ZBTB38	4.3987088609077e-152	-0.437514334989977	0.452	0.647	1.06316793168139e-147
ALOX5	5.97333853945932e-152	-0.104458858880536	0.001	0.106	1.44375592498732e-147
KCNN3	6.8687548822822e-152	-0.27445628675637	0.094	0.324	1.66017805504761e-147
PCM1	7.29342041737654e-152	-0.42544457111252	0.527	0.703	1.76281971487991e-147
PDAP1	9.79675870693236e-152	0.348828659923024	0.915	0.702	2.36787657946555e-147
ENC1	1.24101721754533e-151	0.290661548095646	0.385	0.057	2.99953861480706e-147
TNFRSF10B	1.41861352275269e-151	0.318472839709377	0.606	0.227	3.42878888449324e-147
CENPK	1.61098097496449e-151	0.319143771168225	0.335	0.026	3.89374101648916e-147
MN1	3.71935621216775e-151	-0.233887529694631	0.061	0.267	8.98968396480945e-147
EVA1B	4.47336602473032e-151	0.38134617174499	0.942	0.74	1.08121256817732e-146
KRTCAP2	6.05320165621132e-151	-0.386318590576886	0.776	0.854	1.46305884030628e-146
NDUFS2	1.57549425631927e-150	0.364737697424555	0.811	0.511	3.80796961752368e-146
MTMR10	2.04866986525059e-150	-0.264447288101642	0.078	0.295	4.95163506431067e-146
ITPA	2.45818328732513e-150	0.322363680469211	0.657	0.287	5.94142900546484e-146
VMA21	2.55733163622998e-150	0.331183748600286	0.702	0.332	6.18107056476787e-146
CXCL12	2.67033700598052e-150	-0.162151672346661	0.018	0.166	6.45420454345491e-146
KIF5B	4.43241462254403e-150	-0.354911832668562	0.921	0.945	1.07131461426889e-145
CDC20	4.45159787291121e-150	0.513486088283279	0.301	0.007	1.07595120588264e-145
KLF9	9.18214429596485e-150	-0.389751422943031	0.261	0.514	2.2193242763347e-145
APH1B	1.61052578875114e-149	0.280199949179339	0.414	0.079	3.89264083141151e-145
CLTA	1.69492811809025e-149	0.269878879841642	0.997	0.966	4.09664126142414e-145
ANKRD1	2.46968644075268e-149	0.992288022096753	0.493	0.158	5.96923212729924e-145
EFCAB14	2.49868195565353e-149	-0.387602764449099	0.332	0.575	6.03931428681457e-145
EDN1	2.64700299949003e-149	-0.496918607981433	0.932	0.982	6.3978062497674e-145
THUMPD3-AS1	2.65402940545313e-149	0.357343289359251	0.698	0.332	6.4147890729802e-145
SHC1	3.15382219556988e-149	0.358684007476237	0.809	0.484	7.62278824669239e-145
ADAMTS9-AS1	3.16726923915013e-149	-0.119598296490408	0.003	0.115	7.65528975102585e-145
NDUFB9	4.35094272016668e-149	0.299852714992719	0.982	0.909	1.05162285546429e-144
LARP6	6.36311099148293e-149	0.344295332638103	0.763	0.405	1.53796392664143e-144
COL18A1	9.20981076076347e-149	0.41820267304798	0.814	0.506	2.22601126087653e-144
SH3BGRL	1.26282117783253e-148	-0.392510110494081	0.735	0.827	3.05223878682121e-144
DOCK4	1.29557391137009e-148	0.30772642407238	0.507	0.153	3.1314021437815e-144
G6PD	1.30740615424597e-148	0.322652198728531	0.588	0.218	3.16000067481251e-144
MRPS16	1.34561806517395e-148	0.339438293626356	0.896	0.654	3.25235886352544e-144
EMP3	2.13968101143539e-148	-0.439926646175911	0.97	0.972	5.17160900463934e-144
CCNB2	2.23465614210575e-148	0.415406324050035	0.298	0.006	5.40116389546959e-144
HYAL1	2.58264552896012e-148	-0.173598918513373	0.02	0.171	6.2422542434966e-144
TMEM54	2.93356096014332e-148	0.324905478738068	0.616	0.248	7.09041684066639e-144
DDB2	3.04692166969315e-148	0.318214663435331	0.596	0.23	7.36440967564835e-144
NARF	3.2974071819108e-148	0.364777413255658	0.829	0.506	7.9698331586784e-144
NELFE	5.19510908081744e-148	0.338177118378268	0.846	0.538	1.25565786483358e-143
OCLN	5.39888673272465e-148	-0.22624371265434	0.059	0.259	1.30491092329955e-143
FAT4	5.60191101414285e-148	-0.243259910140716	0.066	0.272	1.35398189211833e-143
SMARCA4	1.20445572658038e-147	0.333730324199591	0.744	0.39	2.91116949114477e-143
C1orf21	1.30962216694879e-147	-0.426887474869439	0.513	0.7	3.16535677751523e-143
RRP36	1.61200152081106e-147	0.305333393058827	0.587	0.225	3.89620767580032e-143
PIBF1	1.90911860999535e-147	-0.307393822435055	0.141	0.381	4.61433968035875e-143
DHRSX	2.08461536599481e-147	0.29021089244176	0.514	0.16	5.03851533960946e-143
NEK7	2.88190369452413e-147	-0.326551878078849	0.145	0.386	6.96556122966483e-143
PBK	3.13289028915334e-147	0.383657172847663	0.293	0.004	7.57219582888363e-143
MCF2L	3.46979236894473e-147	-0.132680927703164	0.009	0.135	8.38648815573941e-143
EPHX2	4.2699411047563e-147	-0.163834410389402	0.016	0.159	1.0320447650196e-142
C8orf59	4.59199290148824e-147	-0.359747190975106	0.858	0.901	1.10988468428971e-142
SECISBP2L	6.58494855198721e-147	-0.355087600847232	0.196	0.446	1.59158206501531e-142
MTRF1L	6.6681236700335e-147	-0.434626929788577	0.417	0.62	1.6116854910471e-142
CASP8AP2	7.83474808795779e-147	-0.310178377673775	0.129	0.366	1.8936586128594e-142
HOXA6	1.00870617863053e-146	-0.234654297557465	0.064	0.269	2.43804283374999e-142
CAMTA1	1.26196186374035e-146	-0.320108844761751	0.958	0.949	3.05016182466041e-142
WDR34	1.95604528776708e-146	0.348409744580871	0.566	0.216	4.72776146053302e-142
CD276	3.3478498546663e-146	0.267776828915623	0.4	0.075	8.09175309872846e-142
ZFP14	3.82109866817111e-146	-0.170241357234996	0.028	0.191	9.23559548096958e-142
NKAIN2	3.83083271437066e-146	-0.107433542170427	0.001	0.101	9.25912267063389e-142
EIF2AK4	6.45602471634165e-146	0.332696206979747	0.762	0.414	1.56042117393978e-141
MS4A2	8.11217676143692e-146	-0.330230251614544	0.056	0.253	1.9607131232393e-141
RNASEH2A	9.15474576931598e-146	0.348451081920509	0.512	0.171	2.21270205244367e-141
MSN	9.93366877366458e-146	0.399335451931776	0.948	0.8	2.40096774259473e-141
ZNF793	1.43909471221256e-145	-0.133274151126526	0.011	0.143	3.47829191941776e-141
ISCA2	1.88619676903101e-145	0.287096194626923	0.552	0.184	4.55893759074796e-141
PCDH10	2.21503055467972e-145	0.245920895774674	0.315	0.018	5.35372885066088e-141
SLC35B2	2.65765906660845e-145	0.259203465274769	0.432	0.095	6.42356196399261e-141
SLC41A3	9.16700377182365e-145	-0.422852238159606	0.569	0.721	2.21566481164978e-140
ZMYM4	9.56371495392316e-145	-0.349212852142727	0.214	0.464	2.31154990436323e-140
SNRPA1	1.79568921569143e-144	0.378384949719247	0.66	0.326	4.34018083432618e-140
RCN3	2.12295154454913e-144	0.305251274913594	0.52	0.168	5.13117388317524e-140
ROCK1	2.20813410540917e-144	-0.412952336991355	0.485	0.663	5.33706013277397e-140
OCIAD1	3.14229503242709e-144	-0.385423265091703	0.745	0.819	7.59492709337627e-140
RP11-251M1.1	3.92205350668598e-144	-0.466533206885022	0.305	0.559	9.47960332566001e-140
DNAJC21	4.35905376887973e-144	-0.403637123103618	0.311	0.546	1.05358329593823e-139
PLEKHA4	4.72239464977029e-144	-0.311058422544223	0.13	0.369	1.14140278684948e-139
ST6GALNAC6	5.30495143610029e-144	-0.403026361427951	0.385	0.607	1.28220676210544e-139
METTL7A	5.5969767871335e-144	-0.274937906802001	0.111	0.341	1.35278928945017e-139
TRMT112	7.1650167590619e-144	0.278423328757357	0.99	0.943	1.73178455066526e-139
PRICKLE1	8.64353988565685e-144	-0.395335957535985	0.238	0.488	2.08914359036326e-139
ZNF33B	9.84435979281171e-144	-0.279297130349888	0.109	0.338	2.37938176192259e-139
ZNF33A	1.43397210049823e-143	-0.343973833950117	0.175	0.419	3.46591056690422e-139
SYF2	1.44221339250222e-143	-0.356320363121536	0.882	0.906	3.48582976967787e-139
APLN	1.47892088242056e-143	0.376116619850989	0.282	0.001	3.57455177281049e-139
EBP	1.54689815833196e-143	0.349190400651864	0.624	0.272	3.73885284868834e-139
TANC2	1.62754297737906e-143	-0.359482826636124	0.184	0.429	3.93377137632519e-139
CYP2U1	2.74061203646472e-143	-0.185526476706522	0.029	0.191	6.62405929213522e-139
ATRX	3.08140027540196e-143	-0.390255405049111	0.615	0.747	7.44774446564653e-139
TRAPPC2L	6.90335889151574e-143	0.333157323391907	0.875	0.626	1.66854184407935e-138
RNASEH1	7.27014260069625e-143	0.310066674769915	0.616	0.26	1.75719346658828e-138
GRPEL1	1.33335542981093e-142	0.339296726707408	0.737	0.396	3.22272007385301e-138
CCNA2	1.79019352781397e-142	0.370648409038528	0.284	0.003	4.32689775672636e-138
NHLRC3	1.99476884479325e-142	-0.279296077172275	0.109	0.336	4.8213562978653e-138
HMBOX1	2.70026928165688e-142	-0.358677114519624	0.193	0.439	6.52655085376468e-138
ARF4	4.74421505116968e-142	0.351180321866804	0.919	0.708	1.14667677786771e-137
NOX4	5.95521112175224e-142	0.2557806893077	0.379	0.061	1.43937452812752e-137
IDH3G	6.37858057296298e-142	0.335303805025195	0.763	0.412	1.54170292448515e-137
RBPMS	6.75289263036633e-142	-0.405283855462128	0.363	0.578	1.63217414875954e-137
AC240274.1	8.39004427057604e-142	-0.155322706696282	0.018	0.16	2.02787370019823e-137
DPH3	1.16146117549676e-141	0.318977618446104	0.675	0.318	2.80725166117566e-137
DUSP23	1.34427722681595e-141	-0.451151386126015	0.815	0.87	3.24911805721416e-137
ZNF397	1.82394894634013e-141	-0.218209996387424	0.051	0.238	4.4084846033041e-137
EVA1C	2.98366074834962e-141	-0.399034675122436	0.363	0.587	7.21150802876103e-137
ARHGAP18	3.68196345575975e-141	0.371807802855415	0.578	0.224	8.89930567257131e-137
MSANTD3	3.97964396186233e-141	0.265940180583476	0.479	0.136	9.61879945582124e-137
HCST	7.19463650445428e-141	-0.112369377733169	0.006	0.119	1.7389436431266e-136
EPB41L1	7.77049126702441e-141	-0.227171999191028	0.059	0.253	1.8781277392398e-136
GMPPB	8.0936062836068e-141	0.27274197603862	0.484	0.138	1.95622463874776e-136
GLIPR1	8.30921801151938e-141	0.31684821562594	0.434	0.105	2.00833799338423e-136
TMEM8A	1.31266132642253e-140	0.262368439516767	0.428	0.099	3.17270242596326e-136
STEAP2	1.31480270045513e-140	-0.120632225454543	0.008	0.129	3.17787812700005e-136
FIS1	2.12145958736804e-140	0.27286796975643	0.993	0.945	5.12756782266856e-136
DAD1	2.22529730600124e-140	0.311873755440626	0.987	0.924	5.37854358860499e-136
EIF4E2	3.21550026023291e-140	0.32530389603514	0.884	0.625	7.77186412898294e-136
THAP11	3.2658377105544e-140	-0.322029977112011	0.181	0.423	7.89352974640997e-136
LRRC8A	3.27267407748036e-140	0.329446429711775	0.694	0.343	7.91005324527004e-136
H3F3A	3.63900769960796e-140	0.234959491267958	1	0.999	8.79548160995244e-136
GSTM4	5.39888131954097e-140	-0.225949718921448	0.062	0.257	1.30490961493305e-135
NAP1L1	5.58397274966532e-140	0.237469528494383	1	0.997	1.34964621359411e-135
VPS13C	6.40005517423311e-140	-0.39394115660842	0.311	0.545	1.54689333561214e-135
THOP1	9.87761194562049e-140	0.257512568322343	0.418	0.09	2.38741880725647e-135
TFRC	1.25550380941651e-139	0.265909838481258	0.365	0.058	3.03455270735971e-135
OSTC	1.40653139556985e-139	0.301684297194114	0.986	0.91	3.39958638309234e-135
ZFC3H1	1.48302892444801e-139	-0.323318618636054	0.173	0.415	3.58448091039084e-135
TGFBR2	1.5613605833919e-139	0.36542469408118	0.796	0.474	3.77380853005822e-135
ANKRD36B	1.63111851422004e-139	-0.1875385390415	0.035	0.202	3.94241344886984e-135
CTNNAL1	1.7264046933334e-139	-0.383191758124794	0.807	0.869	4.17272014378682e-135
ANGPT2	3.12898859835743e-139	0.339327056613664	0.411	0.087	7.5627654422299e-135
WDR1	3.73938127339923e-139	0.319196690316401	0.943	0.784	9.03808453780593e-135
SCO2	3.94995425172295e-139	0.316480038917397	0.651	0.294	9.54703942641437e-135
EMC6	4.02406855870827e-139	0.327304890231299	0.904	0.684	9.72617370639788e-135
KIAA1161	9.37874211476497e-139	-0.199277596577315	0.042	0.217	2.26684196913869e-134
PRPF6	1.08939309595686e-138	-0.377127483792552	0.714	0.8	2.63306311292773e-134
SNRPD3	1.29866132351234e-138	0.336783674898627	0.921	0.724	3.13886441892932e-134
RNF11	2.01361996725529e-138	-0.405487570305164	0.548	0.704	4.86691946085604e-134
SETD2	3.44907742134568e-138	-0.337132866180468	0.208	0.452	8.33642012739251e-134
EIF3L	1.60963766382262e-137	-0.276324310083882	0.985	0.991	3.89049423345928e-133
PIN1	2.47312625418504e-137	0.325085837129659	0.924	0.744	5.97754615636525e-133
SMARCB1	2.64886997122904e-137	0.319096873246095	0.74	0.394	6.4023187204606e-133
PDXK	3.00319256096624e-137	0.293933540787885	0.551	0.206	7.2587164198554e-133
POF1B	4.27221472895115e-137	-0.118093720560386	0.006	0.117	1.03259429998749e-132
CALML4	4.46188849261906e-137	-0.14033588950964	0.014	0.146	1.07843844866603e-132
POLR3GL	4.65778879041385e-137	-0.393267910135785	0.587	0.724	1.12578755064303e-132
NHSL2	6.65842955656828e-137	-0.352263946059433	0.247	0.488	1.60934242382255e-132
TIMM22	7.62794998214133e-137	0.306867327331814	0.675	0.324	1.84367551068356e-132
ZFAND1	1.21257319955232e-136	-0.426786256978526	0.455	0.639	2.93078942331796e-132
MDM2	1.35157081522186e-136	0.362191009635433	0.454	0.135	3.26674666039123e-132
ZBED3	1.54387329612665e-136	-0.254299579342654	0.102	0.321	3.7315417567381e-132
SEC24D	2.09189113889669e-136	0.268555354710781	0.513	0.164	5.0561008827133e-132
C17orf58	2.18116458590191e-136	-0.317871552706081	0.182	0.427	5.27187480412493e-132
ZNF37A	3.107783008847e-136	-0.289698688608199	0.128	0.355	7.5115115323832e-132
AFAP1	3.27275194181084e-136	-0.425324187140298	0.445	0.634	7.91024144335681e-132
ARHGAP5	3.43884367516584e-136	-0.303354489929755	0.141	0.37	8.31168516287583e-132
GOLGB1	3.8298435509086e-136	-0.414794970777701	0.446	0.638	9.25673186254609e-132
EEF1E1	3.91596869484378e-136	0.350239282465256	0.734	0.407	9.46489633543741e-132
AMDHD2	4.69192102622981e-136	0.242198419057021	0.379	0.066	1.13403731203974e-131
SH3TC1	6.03884253640458e-136	0.268494547610157	0.405	0.088	1.45958824104899e-131
ITSN1	6.27895159697703e-136	-0.386359285926963	0.297	0.531	1.51762260098935e-131
CEP55	6.63050006296988e-136	0.325030530267732	0.271	0.002	1.60259186521982e-131
CNN2	6.68582606223305e-136	0.343951628980904	0.802	0.473	1.61596415924173e-131
PJA2	6.73827159316407e-136	-0.402559117463805	0.373	0.581	1.62864024406775e-131
GALE	8.45625108810393e-136	0.284732881179743	0.554	0.205	2.04387588799472e-131
ANKRD29	8.86296002774276e-136	-0.202806610032593	0.044	0.219	2.14217743870543e-131
CCT2	1.09043869110634e-135	0.36519102043719	0.864	0.631	2.63559031640402e-131
ACLY	1.3715697119614e-135	0.292851387591235	0.616	0.256	3.3150839938107e-131
CCNG1	1.38398532070854e-135	0.345982324451033	0.828	0.525	3.34509252015254e-131
EMD	1.85201959483984e-135	0.315776306087084	0.779	0.434	4.4763313607279e-131
NOP56	1.91376538620897e-135	0.343504548204849	0.758	0.428	4.62557093846708e-131
COPS2	1.9677586859722e-135	-0.420623581537388	0.488	0.661	4.7560727439948e-131
RP11-322E11.5	2.16091438649553e-135	0.249633308761403	0.323	0.033	5.2229300721597e-131
SERTAD1	2.41767076528523e-135	0.3906768464553	0.8	0.498	5.84351023969439e-131
NINJ1	3.95456594953162e-135	0.369384931850221	0.747	0.419	9.55818590001791e-131
PLK1	4.51560746392521e-135	0.416705848925575	0.287	0.012	1.09142232403072e-130
PLS3	9.19626313478643e-135	0.347346462928461	0.83	0.544	2.22273679967788e-130
CENPA	1.22587432789743e-134	0.375192073930329	0.271	0.003	2.9629382505281e-130
CXCL8	1.59744335858367e-134	0.360306968763471	0.288	0.012	3.86102059769674e-130
CALR	3.3087439485448e-134	0.329085424882055	0.983	0.892	7.99723412363277e-130
MAN1C1	3.55745464387606e-134	-0.195382093960385	0.051	0.234	8.59836787424844e-130
DBNDD1	3.87738671980583e-134	0.22968207034926	0.303	0.022	9.37164370177069e-130
SNX18	5.81123123825332e-134	-0.314351518063444	0.154	0.386	1.40457459028583e-129
CCT3	5.98807107917272e-134	0.300645939420176	0.968	0.878	1.44731677983605e-129
CREBRF	7.11235735260706e-134	-0.262238254829739	0.106	0.326	1.71905677212513e-129
LINC00520	7.2261889547266e-134	0.342543438545741	0.272	0.004	1.74656987035742e-129
PPP1R13L	2.05570441257111e-133	-0.347995848444343	0.21	0.447	4.96863756518436e-129
TMEM173	2.51271608195373e-133	-0.390051502445992	0.622	0.755	6.07323477008216e-129
TTC3	2.671896437357e-133	-0.373060194820588	0.725	0.81	6.45797368909186e-129
RNASET2	2.85367420887504e-133	-0.352479738053061	0.252	0.488	6.89733056285098e-129
KIF26A	3.77832567434824e-133	-0.284339474839238	0.119	0.344	9.1322131548997e-129
COX7C	4.56666203759222e-133	0.201743454744022	1	0.999	1.10376221448604e-128
TMEM132A	6.78896970744454e-133	0.260053676729124	0.4	0.085	1.64089397828935e-128
FAM174B	9.27424293358949e-133	0.236590877018669	0.29	0.016	2.24158451704858e-128
MCTS1	9.31606705979071e-133	0.330034239166249	0.868	0.595	2.25169340835141e-128
FEZ2	1.02121219157406e-132	0.351212849524698	0.876	0.644	2.46826986703451e-128
TUSC2	1.08010014092752e-132	0.336946777297415	0.854	0.578	2.61060204062183e-128
EDF1	1.23773079772903e-132	0.207547762913431	1	0.998	2.99159533811106e-128
SLC1A5	1.34848746332983e-132	0.268230271936278	0.489	0.154	3.25929419886821e-128
LINC00607	2.46810757243376e-132	0.290704274268967	0.516	0.178	5.96541600257239e-128
OTUD6B-AS1	2.63847612355987e-132	-0.388477295392389	0.336	0.553	6.37719679064421e-128
CCDC50	2.75282244604932e-132	0.339465690062285	0.886	0.636	6.6535718521012e-128
HES4	2.80216478313448e-132	-0.319949752425402	0.153	0.383	6.77283228083603e-128
NACA	2.8769020718071e-132	-0.152395954692428	1	1	6.95347230755777e-128
RNF149	3.59776908422538e-132	0.278571227738185	0.52	0.181	8.69580787657274e-128
MYBL2	4.87115868055161e-132	0.28678609680449	0.276	0.009	1.17735905308932e-127
YKT6	5.50459265088156e-132	0.271942651507121	0.55	0.202	1.33046004371807e-127
ZWINT	6.06022873558624e-132	0.318397651170369	0.305	0.026	1.46475728539119e-127
NR2F2-AS1	6.36604354495403e-132	-0.295468880771092	0.131	0.359	1.53867272481539e-127
NMT1	8.95805472876867e-132	0.343583057428857	0.768	0.451	2.16516182794339e-127
MRPL14	1.63877640902439e-131	0.309262009974117	0.927	0.741	3.96092258061195e-127
PCAT19	2.50384822129308e-131	0.36069004335064	0.806	0.507	6.05180115086538e-127
NDUFA4L2	2.7611911525893e-131	0.217016866744762	0.262	0.001	6.67379901580833e-127
STXBP3	2.88187016744757e-131	-0.329539025474168	0.206	0.442	6.96548019472077e-127
CRISPLD2	3.82668534902482e-131	-0.159162918857178	0.016	0.145	9.24909848859299e-127
ARMC7	5.16870118552727e-131	-0.29125020957401	0.141	0.369	1.24927507654194e-126
SCARA3	5.31849032829668e-131	-0.394886760139852	0.417	0.621	1.28547911234931e-126
COBLL1	9.22664280642282e-131	-0.283652717345077	0.115	0.331	2.2300795663124e-126
BLOC1S1	9.59605218324244e-131	0.308619975349484	0.948	0.785	2.3193658126897e-126
FAM189A1	9.92196444023815e-131	-0.106521151174179	0.006	0.112	2.39813880520556e-126
SEP15	1.11611695568588e-130	-0.382684876393443	0.749	0.81	2.69765468189276e-126
MACROD1	1.18469198922709e-130	0.268304305873269	0.526	0.185	2.86340053796187e-126
CHMP3	1.47051253571007e-130	-0.36351697094015	0.769	0.826	3.55422879881123e-126
CNIH4	1.5886800158871e-130	0.335432253312906	0.911	0.718	3.83983959839912e-126
SUMO3	2.18390213627183e-130	0.30317309102835	0.948	0.789	5.27849146336902e-126
TAX1BP3	2.21045740778229e-130	0.32752339539119	0.914	0.69	5.34267555460979e-126
ANKRD28	4.03525400348355e-130	0.272973906842157	0.499	0.163	9.75320892641974e-126
CTNNB1	8.89165956812197e-130	-0.373661590426141	0.603	0.758	2.14911411761508e-125
ILF2	9.0199486705923e-130	0.349401673432141	0.907	0.72	2.18012159368216e-125
ADGRL3	9.34989439191926e-130	-0.103408120819576	0.005	0.11	2.25986947452689e-125
TSTD1	1.10829337182622e-129	0.435401879257516	0.7	0.423	2.67874507970398e-125
THRB	1.32059372706267e-129	-0.109088467183834	0.007	0.117	3.19187503831046e-125
OTUD1	1.51936541433691e-129	-0.157623314507998	0.025	0.171	3.67230620645231e-125
YWHAZ	1.55434902139795e-129	0.309402130857472	0.944	0.767	3.75686158471885e-125
C8orf4	1.55593856345474e-129	0.424124356055268	0.697	0.38	3.76070350787011e-125
PSMD1	1.91364039108913e-129	0.329879659584182	0.701	0.374	4.62526882526243e-125
PSMA5	2.52139348199609e-129	0.333052775152799	0.835	0.575	6.09420804598455e-125
ITGAV	3.2436065740653e-129	0.291326807308344	0.546	0.208	7.83979708951582e-125
CTTN	4.80974752802529e-129	0.336916892173665	0.813	0.5	1.16251597752371e-124
RAB31	5.58639449323652e-129	0.247328622840403	0.427	0.11	1.35023154901527e-124
STX1A	7.2399946155823e-129	0.210283055727372	0.286	0.016	1.74990669858624e-124
ANAPC15	9.72432579737829e-129	0.304610573237296	0.667	0.33	2.35036954522633e-124
PTGS2	1.1607723883372e-128	-0.391875187490321	0.169	0.402	2.805586862611e-124
CD46	1.28882071571722e-128	-0.406586314997776	0.488	0.654	3.11507966988853e-124
MET	1.4571633364246e-128	-0.356229883817098	0.23	0.457	3.52196378413826e-124
LYPLA2	1.721791994444e-128	0.304064726670255	0.684	0.343	4.16157125057114e-124
NDUFB11	1.94538628559213e-128	0.255451365626127	0.995	0.959	4.70199865227619e-124
SPEN	2.15171431066073e-128	-0.287777208575025	0.152	0.38	5.20069348886699e-124
ADGRL1	2.54572040097585e-128	-0.298204225594188	0.158	0.387	6.15300620915864e-124
DNASE1L1	4.15655519322487e-128	-0.403338146906892	0.482	0.651	1.00463939020245e-123
ANO2	5.15358053792863e-128	-0.167272945403707	0.034	0.189	1.24562041601735e-123
CASP10	7.97587936295587e-128	-0.305880092571395	0.17	0.401	1.92777004202643e-123
CCDC69	1.0590655299759e-127	-0.328912816525586	0.18	0.409	2.55976138595174e-123
FAM189A2	1.10308094510146e-127	-0.132336400714886	0.013	0.135	2.66614664431023e-123
CDC42EP2	1.4117221995137e-127	0.317284742026193	0.603	0.271	3.41213255622462e-123
MDFI	1.42280846446673e-127	0.288635585564505	0.543	0.202	3.43892805861608e-123
KNSTRN	1.5227398335046e-127	0.279317655458329	0.307	0.031	3.68046217758063e-123
ZNF593	1.74072502061887e-127	0.324266394570355	0.824	0.538	4.20733237483581e-123
CAST	2.57318992474234e-127	-0.340583279998104	0.848	0.879	6.21940004810223e-123
CCDC186	2.76165433736653e-127	-0.335235019059741	0.2	0.431	6.6749185334149e-123
ARRDC3	3.44223357312398e-127	-0.293813653850858	0.116	0.33	8.31987854624066e-123
C19orf70	6.20199810444986e-127	0.282156085059178	0.973	0.853	1.49902294184553e-122
SSNA1	7.98812975886577e-127	0.314614905669355	0.884	0.651	1.93073096271786e-122
PTP4A2	8.77833458633807e-127	-0.378766465225389	0.663	0.76	2.12172346951791e-122
MFSD3	9.16678548910315e-127	0.220220903501046	0.34	0.052	2.21561205271623e-122
RNPEP	9.54612697743884e-127	0.276819818942889	0.599	0.253	2.30729889044697e-122
WWP1	2.29206164630494e-126	-0.334639360000496	0.208	0.438	5.53991299911905e-122
CSE1L	2.52851765808416e-126	0.285499135678547	0.514	0.187	6.1114271795894e-122
GLRX3	2.59841232996655e-126	0.31345952537616	0.865	0.633	6.28036260152916e-122
MSRB2	3.19760719824628e-126	0.321909720856203	0.773	0.46	7.72861659816126e-122
HSP90B1	3.43004831233879e-126	-0.334086679320956	0.932	0.971	8.29042677092286e-122
MGAT4B	3.48853980556902e-126	0.30045872420064	0.58	0.246	8.43180071006032e-122
ELP5	3.91374008928478e-126	0.283075586907605	0.641	0.293	9.45950979580131e-122
PLIN3	4.32425921042745e-126	0.286391750670713	0.63	0.285	1.04517345116031e-121
FUS	6.39811730298713e-126	0.338413755639478	0.91	0.708	1.54642495213199e-121
CEP350	7.41473173794161e-126	-0.313238726749167	0.19	0.42	1.79214066106049e-121
DLGAP5	8.27908988907102e-126	0.326883052659197	0.262	0.006	2.00105602618847e-121
ARMC10	8.285138345628e-126	-0.338740624537779	0.259	0.486	2.00251793813829e-121
PET100	8.51280422470494e-126	0.316669969710278	0.89	0.651	2.05754478111118e-121
CCL28	9.82621597760128e-126	-0.163537663341993	0.031	0.18	2.37499640178623e-121
ZMAT1	1.15532326296691e-125	-0.168514311573308	0.033	0.187	2.79241632659102e-121
EPHB2	1.37425096595397e-125	0.195756872158968	0.257	0.004	3.32156458471074e-121
HNMT	1.3810737598961e-125	0.218208529934494	0.279	0.016	3.33805527766888e-121
ELMO1	4.37634224883603e-125	-0.33514883718224	0.23	0.46	1.05776192154367e-120
AHCY	5.80281549977281e-125	0.289617082360959	0.669	0.326	1.40254050629509e-120
WIPI1	5.90701005741188e-125	0.247631390370896	0.447	0.125	1.42772433087645e-120
DUSP22	6.08898154401001e-125	-0.363896423830667	0.328	0.541	1.47170683918722e-120
EIF2S3	6.65467882549237e-125	-0.404859256403913	0.699	0.764	1.60843587212151e-120
IFT122	1.25873143168738e-124	-0.254813760758409	0.104	0.31	3.0423538703884e-120
FKBP11	2.23409049929459e-124	0.312648458047299	0.702	0.382	5.39979673679502e-120
ZBTB7A	2.24255541430366e-124	-0.342303443162882	0.243	0.47	5.42025643637194e-120
ZNF354B	2.35990189418719e-124	-0.162167218387744	0.031	0.181	5.70388287825044e-120
PSMB3	3.38196065577614e-124	0.299298291342366	0.978	0.92	8.17419890501094e-120
MPST	3.50709897564195e-124	0.305045243274375	0.959	0.789	8.47665822412658e-120
TMEM51	4.04869719752397e-124	0.206684293445324	0.277	0.016	9.78570112641543e-120
TROAP	4.17091875385718e-124	0.269863045575318	0.254	0.003	1.00811106280728e-119
TGFB1	1.11219119526327e-123	0.323015397224733	0.871	0.599	2.68816611895132e-119
HAGLROS	1.5167692604819e-123	0.2199385216089	0.305	0.033	3.66603130258476e-119
AURKA	2.3173082287063e-123	0.366182974145982	0.27	0.014	5.60093398878314e-119
GTF2I	3.14873451698061e-123	-0.366241819681019	0.661	0.754	7.61049132754213e-119
TOP1	3.49991470303851e-123	0.329085222844876	0.841	0.584	8.45929383724409e-119
NDUFAF2	3.91747753447921e-123	0.302473682579222	0.744	0.416	9.46854320083626e-119
MRPS11	4.23236589949793e-123	0.301922713255277	0.845	0.562	1.02296283790865e-118
CADPS2	6.05743555917205e-123	-0.268908559459598	0.115	0.326	1.46408217465188e-118
NDUFAF3	1.22863028346041e-122	0.294757926299827	0.944	0.783	2.96959939512382e-118
SPEG	1.26982108065063e-122	-0.144692537877183	0.027	0.17	3.06915755193257e-118
TNFAIP1	1.47345598892427e-122	-0.407534918001967	0.496	0.649	3.56134312522995e-118
PPP1R14A	1.5971491523777e-122	-0.326238191813874	0.135	0.352	3.86030950129691e-118
C5orf42	3.27559280286424e-122	-0.236565193398827	0.094	0.295	7.91710780452286e-118
SPC25	3.70899345782004e-122	0.276195899187406	0.25	0.003	8.96463718755105e-118
TRABD	4.97751642609442e-122	0.260824116560867	0.592	0.251	1.20306572018702e-117
UBE2E2	8.56440587917897e-122	0.233763616353297	0.404	0.1	2.07001690099756e-117
NRCAM	1.03261210011198e-121	0.1901207732566	0.245	0.001	2.49582344597067e-117
PSMD3	1.18289141824126e-121	0.291190876265113	0.669	0.328	2.85904855788912e-117
CORO1B	1.21478561354164e-121	0.318963671866636	0.815	0.512	2.93613682793014e-117
APOBEC3C	1.25317197456032e-121	0.217559146070333	0.283	0.021	3.0289166625123e-117
GHR	1.38436923056494e-121	-0.100182853202365	0.005	0.102	3.34602043027545e-117
IL15	1.55793248236596e-121	-0.185815236785429	0.052	0.223	3.76552280987852e-117
OS9	1.96406543365466e-121	-0.385407518980379	0.615	0.731	4.74714615314331e-117
STK25	2.20608983550987e-121	0.301850367611581	0.803	0.492	5.33211913242737e-117
DCXR	2.48856361231464e-121	0.308609188828143	0.824	0.532	6.01485825096448e-117
ATL2	2.5917312143948e-121	-0.253972077533518	0.103	0.304	6.26421434519222e-117
ATAD3A	3.3804760367811e-121	0.221564484033948	0.382	0.084	8.17061058089992e-117
ARHGAP44	3.65435132303267e-121	-0.126218290921893	0.014	0.134	8.83256714776997e-117
YPEL5	5.4325862296361e-121	-0.364252327240705	0.511	0.689	1.31305609170305e-116
TUSC3	5.94660286112974e-121	0.219375791436473	0.357	0.067	1.43729391153506e-116
GBGT1	7.32937236399099e-121	0.241689526687218	0.353	0.069	1.77150930037662e-116
PPP1R18	7.61905065278706e-121	0.308589614364809	0.766	0.441	1.84152454277863e-116
CD58	8.14464143560369e-121	-0.35474890506733	0.253	0.476	1.96855983498541e-116
SCD	9.94479721292374e-121	0.256927275143648	0.404	0.106	2.40365748636367e-116
DDX24	1.52490175825002e-120	-0.31763404935408	0.86	0.892	3.68568754969029e-116
MYZAP	1.5768869009923e-120	0.206184284969222	0.254	0.006	3.81133563969838e-116
FOXM1	2.37907542081044e-120	0.235526973520165	0.252	0.005	5.75022529209885e-116
EI24	2.58666694129278e-120	0.294006758303692	0.931	0.778	6.25197399710464e-116
ZNF467	2.67108140856263e-120	-0.353862997421242	0.346	0.573	6.45600376449588e-116
AVPI1	2.71036943968769e-120	-0.314844403227792	0.189	0.413	6.55096293572515e-116
L3MBTL3	2.71218827599633e-120	0.22281613590786	0.363	0.074	6.55535906308312e-116
CIB1	2.89184587436919e-120	0.300703887953649	0.906	0.708	6.98959147835033e-116
PSMG4	3.31338740228858e-120	0.315107752450188	0.794	0.502	8.00845735133151e-116
PLA2G4A	3.4671317996186e-120	0.326420324357337	0.516	0.202	8.38005755967816e-116
WHAMM	3.57476376219912e-120	-0.214264658366531	0.078	0.267	8.64020401323528e-116
NDUFB3	3.6474504096845e-120	0.297543537790245	0.926	0.746	8.81588764020743e-116
RNH1	4.06811287255648e-120	0.296961481936544	0.953	0.807	9.832628812969e-116
SLC39A4	5.11867110821241e-120	0.242467373791601	0.409	0.108	1.23718280685494e-115
FSD1	6.75452236719741e-120	0.187911054936786	0.249	0.004	1.63256805615161e-115
CLIC4	7.39095175282545e-120	0.32810302086831	0.823	0.537	1.78639303865791e-115
SERINC3	8.46931434831637e-120	-0.35151125430443	0.6	0.727	2.04703327798807e-115
SDHA	1.00746848427048e-119	0.289446194715812	0.723	0.394	2.43505132648174e-115
LRRCC1	1.306021324977e-119	-0.202893082284296	0.055	0.226	3.15665354246941e-115
ASPM	1.64005414861806e-119	0.338463635102686	0.253	0.007	3.96401087720986e-115
GPR146	2.74107805746974e-119	-0.349960332825919	0.311	0.561	6.62518566490436e-115
PTPRJ	4.8125578313783e-119	-0.156034814119479	0.032	0.18	1.16319522784414e-114
THOC3	6.32090323700188e-119	0.242700217038594	0.426	0.122	1.52776231238335e-114
METAP2	1.30638815490399e-118	0.307450902497872	0.94	0.766	3.15754017040293e-114
TIE1	1.54090294489053e-118	0.339580593207706	0.864	0.579	3.72436241780042e-114
RNPC3	1.76144946410531e-118	-0.236056804547286	0.083	0.274	4.25742335474254e-114
PTGES2	2.12718729043154e-118	0.261227387015548	0.606	0.272	5.14141168097303e-114
PPP1R15A	2.52233533755344e-118	-0.397595380416228	0.642	0.746	6.09648451086667e-114
TIGAR	2.55586093004874e-118	0.208189495269616	0.348	0.063	6.17751586792781e-114
LMO4	2.87005832189508e-118	-0.408753403843972	0.501	0.652	6.93693096402041e-114
GSTT2B	5.28306211417911e-118	-0.208012007157891	0.077	0.263	1.27691611299709e-113
TACC3	5.32440174133918e-118	0.308187825628842	0.305	0.042	1.28690790088168e-113
CALCOCO1	6.09808803049029e-118	-0.288025239172918	0.158	0.377	1.4739078769695e-113
RP11-108M9.4	6.67800719631591e-118	-0.280227291086355	0.146	0.36	1.61407433934956e-113
PHYKPL	9.62148114794976e-118	-0.345979326785742	0.241	0.46	2.32551199345946e-113
RBMS2	9.95393190713699e-118	-0.368118011081188	0.424	0.6	2.40586534195501e-113
DPP7	1.05088823677409e-117	0.307064598062479	0.824	0.537	2.53999686828296e-113
PRR11	1.168010296469e-117	0.252290764680006	0.261	0.014	2.82308088656557e-113
FAM198B	1.62913270697575e-117	-0.361194051309488	0.489	0.672	3.93761375276039e-113
CENPH	2.99372835933577e-117	0.239386976768582	0.324	0.054	7.23584144451455e-113
BCL6B	4.00765165317138e-117	0.298809158851756	0.59	0.261	9.68649404571523e-113
DDOST	4.23392747695304e-117	0.313625982222823	0.851	0.591	1.02334027117955e-112
TSEN34	4.39256265722835e-117	0.296004431746629	0.744	0.421	1.06168239425209e-112
GINS2	7.78873447719274e-117	0.246204376037856	0.264	0.016	1.88253712313748e-112
SEMA3F	8.19403630260629e-117	-0.34152148002607	0.253	0.475	1.98049857433994e-112
IFIT2	8.3353634338508e-117	-0.138407134292735	0.028	0.169	2.01465734196174e-112
CFAP97	8.51972680887345e-117	-0.364803328179619	0.486	0.646	2.05921796970471e-112
DNAJC3	8.56001504793147e-117	-0.377963611364498	0.386	0.577	2.06895563708504e-112
TSPAN15	1.07327997500198e-116	0.211818161055003	0.243	0.004	2.59411769957979e-112
SERPINH1	1.26303122908968e-116	0.320670274560487	0.88	0.644	3.05274648070976e-112
TRIP13	1.77198222782316e-116	0.212158665642614	0.25	0.008	4.28288104464857e-112
SAMD11	1.87141721088594e-116	-0.182841533745566	0.039	0.194	4.52321539871132e-112
ANLN	2.31284586774742e-116	0.246633022826906	0.239	0.002	5.5901484623455e-112
CD320	2.6108704622183e-116	0.308369078579448	0.857	0.624	6.31047390718162e-112
TSTA3	2.67902309980568e-116	0.294291702582383	0.768	0.456	6.47519883223032e-112
PSORS1C1	3.8136331582553e-116	0.217971623151894	0.3	0.038	9.21755134350305e-112
TMEM45A	4.35622070580328e-116	-0.272491138288982	0.134	0.343	1.05289854459265e-111
LARP7	4.68200492951111e-116	-0.374187814422994	0.4	0.586	1.13164059146283e-111
AGO3	6.71018776289767e-116	-0.33305907385553	0.226	0.445	1.62185238229237e-111
ZNF181	7.41082757826805e-116	-0.16278341415317	0.037	0.186	1.79119702566739e-111
TCP11L2	1.36366301236007e-115	-0.130346014315013	0.021	0.149	3.29597350087428e-111
EIF3J	6.22613645783972e-115	0.35955563191057	0.91	0.737	1.50485718185986e-110
TFEB	6.66985581447609e-115	-0.176288500533006	0.049	0.211	1.61210415035887e-110
MRTO4	6.67887301558997e-115	0.272287449782228	0.58	0.257	1.6142836078681e-110
NUDT21	7.30655608224411e-115	0.28494620801815	0.718	0.398	1.7659946050784e-110
IL18R1	9.65820147654065e-115	-0.183466735755277	0.042	0.197	2.33438729687988e-110
BAG1	1.39134830988102e-114	-0.344933290036778	0.696	0.778	3.36288886498242e-110
CORO1C	1.55345665112877e-114	0.275785432964757	0.649	0.319	3.75470472577824e-110
OSTM1	2.2514205553363e-114	-0.24305831446673	0.099	0.293	5.44168348224784e-110
ASAP2	3.36102182978509e-114	-0.365799995096247	0.339	0.538	8.12358976259056e-110
TRAF7	4.33045870315537e-114	0.291824096081567	0.762	0.449	1.04667186855265e-109
B3GNT7	4.55024252334101e-114	-0.1354790044028	0.018	0.14	1.09979361789152e-109
TSR2	5.44675080925531e-114	-0.341617483132869	0.295	0.506	1.31647967059701e-109
PITPNC1	6.30604493247696e-114	-0.233931226615454	0.09	0.279	1.52417106017968e-109
ARID4B	6.90665779583459e-114	-0.357037155408109	0.502	0.654	1.66933918925322e-109
ATXN3	8.16157033692589e-114	-0.329608477843198	0.251	0.463	1.97265155043499e-109
MARCH8	8.34521291479654e-114	-0.240896356488454	0.107	0.307	2.01703796150632e-109
PCF11	8.94823870890713e-114	-0.327300728386916	0.222	0.439	2.16278929594285e-109
GBA2	9.7915208233506e-114	0.267643984679823	0.477	0.169	2.36661058300384e-109
SPC24	1.06268889472634e-113	0.233322261587904	0.246	0.009	2.56851905855357e-109
SF3B2	1.15963805496371e-113	0.299275386520867	0.901	0.7	2.80284517884729e-109
CDCA8	1.99889134808953e-113	0.285141160275012	0.238	0.005	4.83132038833238e-109
SNRPA	2.07468718495624e-113	0.304355963530713	0.766	0.463	5.01451892603924e-109
FBN1	2.42071254436621e-113	-0.33658478775652	0.251	0.471	5.85086221973313e-109
MTX1	3.20477793924725e-113	0.287288004521391	0.746	0.436	7.74594827916059e-109
BACE2	6.88001344800914e-113	-0.352902341830583	0.583	0.726	1.66289925038381e-108
MYL4	8.19349404173874e-113	-0.11006841248785	0.011	0.118	1.98036750988825e-108
FHL3	9.2634854274776e-113	0.260516104966896	0.5	0.183	2.23898442782134e-108
ABHD17A	1.13104849898173e-112	0.299130237419063	0.748	0.433	2.73374422203885e-108
SIGMAR1	1.5799396230533e-112	0.278860789965068	0.656	0.335	3.81871406891982e-108
SUB1	1.71730245932014e-112	0.246902830947054	0.993	0.939	4.15072004417678e-108
ACAT2	1.81829957591192e-112	0.312547810210372	0.435	0.145	4.39483007497911e-108
SEMA6A	2.02769837434437e-112	-0.204295145109105	0.064	0.239	4.90094697079034e-108
KIAA0040	2.04580207433107e-112	0.215575048444587	0.273	0.025	4.94470361365821e-108
HLA-DMA	2.26659283702208e-112	-0.177512412456183	0.045	0.201	5.47835488708237e-108
TIPARP	2.58130145735842e-112	0.237300381345366	0.379	0.095	6.2390056224353e-108
TNPO1	2.68147996660052e-112	0.294994814666928	0.718	0.405	6.48113707927345e-108
ITGA10	5.6031694380813e-112	0.271576810168199	0.475	0.167	1.35428605318425e-107
NUDT14	7.30150178831212e-112	0.313223094900488	0.926	0.74	1.76477298223504e-107
ZCCHC24	9.45447214425002e-112	-0.299471553797525	0.185	0.404	2.28514591726523e-107
NUDT22	9.45790535869693e-112	0.254030709709225	0.587	0.255	2.28597572519705e-107
MINOS1	9.73951646898449e-112	0.296639169007098	0.963	0.86	2.35404113055355e-107
MLF2	1.05088499900346e-111	0.285351814188995	0.897	0.685	2.53998904259137e-107
HES2	1.12734983407237e-111	0.173720987652604	0.231	0.002	2.72480454895292e-107
NFE2L3	1.18799981020979e-111	0.185283659251961	0.269	0.023	2.87139554127705e-107
CD302	1.28321811238569e-111	-0.336394836813212	0.251	0.467	3.10153817763621e-107
CDCA3	1.47973830880935e-111	0.264525720471585	0.236	0.005	3.5765274923922e-107
NUDC	1.55653773681216e-111	0.334149767395715	0.918	0.762	3.762151709875e-107
DBN1	1.86574842773541e-111	0.2918832682561	0.733	0.419	4.50951394983649e-107
THRA	2.19156025443038e-111	-0.303917816319489	0.174	0.387	5.29700113495824e-107
COA4	2.29834986031356e-111	0.308682056730982	0.82	0.567	5.55511161237788e-107
MXD3	2.55420585980161e-111	0.317024195560439	0.27	0.026	6.1735155631405e-107
DKK1	2.9585746297329e-111	0.326419761547808	0.226	0	7.15087488006443e-107
UBN2	5.40538232599613e-111	-0.180890418226334	0.052	0.214	1.30648090819326e-106
NSA2	6.04924254330814e-111	0.296586888344072	0.919	0.691	1.46210192271758e-106
TXNDC12	1.23428914122634e-110	-0.354286753940127	0.593	0.707	2.98327685434407e-106
CCND1	1.94698459541747e-110	0.405695252425911	0.847	0.654	4.70586176712403e-106
BORCS8	2.19233044314465e-110	0.232914252152586	0.492	0.182	5.29886268108062e-106
HIST1H1C	2.4923989128777e-110	-0.371365625712184	0.357	0.562	6.02412817242541e-106
GCHFR	3.04889386033794e-110	-0.340243053389787	0.378	0.587	7.3691764604368e-106
XPNPEP1	3.22329608617395e-110	0.225754089974804	0.468	0.157	7.79070664028244e-106
GOLT1B	4.29493371514443e-110	0.238077454904883	0.54	0.218	1.03808547895041e-105
HAPLN1	4.70796437464073e-110	-0.127703847129441	0.007	0.104	1.13791498935066e-105
LMBRD1	5.87973128792818e-110	-0.278146791511997	0.185	0.4	1.42113105229224e-105
TAF1D	6.12862511200303e-110	0.309120412564625	0.927	0.707	1.48128868957113e-105
SLC16A2	7.5584275945108e-110	-0.167344380625735	0.038	0.184	1.82687194959326e-105
CCDC47	1.04963984935321e-109	-0.387127192675824	0.415	0.586	2.53697951588671e-105
PIK3IP1	1.18518215394364e-109	-0.192807698508976	0.058	0.222	2.86458526608177e-105
FERMT3	1.63994373247201e-109	0.213276206335963	0.292	0.038	3.96374400138486e-105
ATG7	1.69435115134213e-109	0.255105241515745	0.464	0.163	4.09524673279392e-105
IER5	2.46305081379135e-109	-0.311722860240877	0.198	0.408	5.9531938169337e-105
FRYL	2.63593462575987e-109	-0.310519728541093	0.227	0.442	6.3710539904616e-105
WBSCR27	2.88940931127949e-109	0.202759706171001	0.329	0.062	6.98370230536252e-105
AEN	2.94938124740419e-109	0.196269571138776	0.309	0.048	7.12865447497592e-105
CASP1	3.44999045149061e-109	-0.231776658618012	0.096	0.286	8.33862692125282e-105
MELK	3.49858112581897e-109	0.199657497642542	0.226	0.002	8.45607058110446e-105
HSPA1A	3.61071486958175e-109	-0.25661020015613	0.105	0.296	8.72709783977909e-105
ZNF493	3.78648886123882e-109	-0.175874348101116	0.045	0.197	9.15194357761424e-105
PPM1G	3.79321197989497e-109	0.309703467240453	0.881	0.672	9.16819335540615e-105
PSMA3	3.86790271556925e-109	0.330182589604843	0.886	0.703	9.34872086353088e-105
SLC16A3	5.75761041663629e-109	0.315994416587075	0.759	0.466	1.39161443770099e-104
THEM6	7.12427772774201e-109	-0.313149930486838	0.224	0.438	1.72193792679524e-104
HLA-DPB1	8.04575860888883e-109	-0.322209037436017	0.224	0.436	1.94465985576843e-104
PFDN1	1.52664083484529e-108	0.292722378205187	0.86	0.588	3.68989089782106e-104
CDK16	1.86869877206481e-108	0.238622869634957	0.611	0.281	4.51664493208064e-104
COLGALT1	1.93581233951451e-108	0.22590806569544	0.385	0.101	4.67885842460658e-104
SLC16A5	1.96717997975739e-108	-0.18611203941987	0.054	0.214	4.75467401107362e-104
ADAMTS18	2.49834722086197e-108	0.241162620391245	0.33	0.066	6.03850523282338e-104
H2AFX	3.12648839461238e-108	0.302796376852773	0.449	0.161	7.55672244977813e-104
CTB-50L17.10	3.88195203074938e-108	0.242807672997803	0.551	0.233	9.38267805832126e-104
POP7	4.2052309115245e-108	0.311912991947317	0.712	0.425	1.01640431131547e-103
FDFT1	6.36505356870395e-108	0.346659691068202	0.668	0.374	1.53843344755575e-103
ARHGDIA	7.85558582931823e-108	0.290330553006382	0.928	0.759	1.89869509494622e-103
STIP1	9.91198771528277e-108	0.266174951774125	0.649	0.328	2.39572743078384e-103
ARHGEF10	1.06783852897843e-107	-0.322468303329209	0.246	0.459	2.58096572454086e-103
ZNF595	2.03797147317353e-107	-0.17493870178869	0.041	0.187	4.92577705066042e-103
BOP1	2.41587571616033e-107	0.225675448366321	0.442	0.143	5.83917160595951e-103
SYT5	2.53459681668881e-107	-0.116390311827632	0.008	0.105	6.12612050593684e-103
IRF2	2.71645241850814e-107	-0.311619307466649	0.22	0.431	6.56566549553417e-103
ADSSL1	2.9865170724145e-107	-0.24250711779284	0.105	0.297	7.21841176402584e-103
MPDU1	3.71803447085984e-107	0.226960788160951	0.52	0.205	8.98648931606822e-103
MALT1	4.09266768822797e-107	-0.180859826045056	0.043	0.192	9.891977802447e-103
MYO10	4.53473875748923e-107	0.279891214910103	0.662	0.342	1.09604635768515e-102
IGFBP2	4.89231617648957e-107	-0.372233252751886	0.625	0.741	1.18247281985753e-102
CEP162	5.75802098422465e-107	-0.173397911009562	0.042	0.19	1.3917136718871e-102
SULT1B1	6.67847910547359e-107	-0.298272524402013	0.16	0.363	1.61418839979297e-102
NCOA7	7.13614369601188e-107	-0.368384440140412	0.412	0.591	1.72480593132607e-102
FKBP3	7.52401643675231e-107	0.290825057006767	0.851	0.614	1.81855477276303e-102
TPRKB	8.26314574317959e-107	-0.334439498321649	0.746	0.803	1.99720232612651e-102
MLLT6	8.87493367305573e-107	-0.293038364653145	0.21	0.425	2.14507146877757e-102
LSP1	9.23516532769425e-107	-0.120671785266816	0.016	0.129	2.2321394597037e-102
PRR34-AS1	1.01797441429468e-106	0.274497794027363	0.533	0.229	2.46044415935025e-102
MRPL47	1.05702395563344e-106	0.286829601006941	0.758	0.462	2.55482690076602e-102
CCDC86	1.18972237402771e-106	0.215366935076749	0.395	0.109	2.87555897802496e-102
ABCA1	1.28179278304771e-106	-0.127614991353682	0.018	0.134	3.09809315662632e-102
PREX1	1.36598917862744e-106	0.176195049843145	0.264	0.025	3.30159584474253e-102
TPST2	1.42333567180473e-106	-0.350560939499099	0.623	0.725	3.44020231875204e-102
SCCPDH	1.47683680986316e-106	0.273675164013127	0.716	0.401	3.56951456943925e-102
NUDT4	2.20311011187526e-106	-0.355933560933292	0.687	0.792	5.3249171404025e-102
NUDT5	3.30241345315152e-106	0.297585184522504	0.805	0.563	7.98193331626723e-102
CUX1	3.52335947695332e-106	-0.336657860690002	0.313	0.514	8.51595985579617e-102
HJURP	4.06960310780367e-106	0.254351793861819	0.221	0.002	9.83623071156147e-102
TCEB1	4.24504681072044e-106	0.260594023868917	0.961	0.87	1.02602781415113e-101
PNRC2	4.55010592597997e-106	-0.358252166097637	0.47	0.627	1.09976060230936e-101
XRCC6	5.01784959995553e-106	0.324169801260186	0.872	0.68	1.21281424830925e-101
GNPNAT1	8.80430305060881e-106	0.20537632285024	0.382	0.101	2.12800004733215e-101
CXCL3	1.77205616656237e-105	-0.271373904952546	0.044	0.191	4.28305975458125e-101
NMRAL1	2.18176124454393e-105	0.256197060160556	0.631	0.308	5.27331692806267e-101
FOXO3	2.65332362897212e-105	-0.285271950798682	0.174	0.381	6.41308321122563e-101
MIDN	3.01461803581706e-105	0.330857190764047	0.852	0.602	7.28633179256983e-101
ZNF506	3.04215038134162e-105	-0.186080809856162	0.054	0.211	7.35287747170269e-101
RAP2B	3.41673306091954e-105	0.227981903912868	0.428	0.139	8.25824380824253e-101
MIR4458HG	9.48567750203758e-105	0.328220670833946	0.574	0.281	2.29268825224248e-100
CAMK1	9.76591068422422e-105	0.241494210254253	0.54	0.233	2.36042061237699e-100
TARS	1.50114785498931e-104	0.255821586427215	0.584	0.273	3.62827436550916e-100
UCHL3	1.53548106669629e-104	0.258010121297743	0.595	0.284	3.71125773820492e-100
CHD9	1.7048353175216e-104	-0.371154572545504	0.504	0.641	4.12058696244971e-100
BAZ1A	2.47180102348317e-104	0.258474066848654	0.609	0.295	5.97434307375882e-100
CCDC68	2.67520139587082e-104	-0.247196637291728	0.082	0.256	6.46596177381976e-100
MRPS2	2.87743872631112e-104	0.266955066527697	0.734	0.419	6.95476940149397e-100
MKKS	3.27731001818422e-104	0.287956992725737	0.806	0.529	7.92125831395126e-100
NRK	3.66061820266524e-104	-0.113564749891559	0.011	0.113	8.84771419584189e-100
FABP4	5.78940436130803e-104	0.477301532242418	0.215	0.001	1.39929903412815e-99
CTSZ	5.85483576198432e-104	-0.318389343379237	0.85	0.862	1.41511380367161e-99
PIP5K1C	1.48744667036232e-103	-0.322779468198886	0.21	0.414	3.59515860226573e-99
ERAP2	1.64133671852144e-103	0.23429877488456	0.538	0.223	3.96711084866632e-99
HIST1H2AC	1.80624121895264e-103	-0.15357531387183	0.039	0.181	4.36568502620854e-99
PSMD11	1.92218913188888e-103	0.281242193108312	0.73	0.436	4.64593113177542e-99
HIST1H4C	3.1024410191006e-103	1.1718800502811	0.94	0.839	7.49859994316615e-99
SENP7	3.41016491279426e-103	-0.21504605044506	0.079	0.252	8.24236859422373e-99
BST1	3.66126760741755e-103	-0.20542368954591	0.07	0.237	8.84928380712822e-99
VCP	4.04121308762932e-103	0.288874971812384	0.85	0.614	9.76761203280006e-99
STK17A	5.59519204633808e-103	0.283726353068069	0.661	0.355	1.35235791759991e-98
PCBD1	5.75007864757214e-103	0.270954401292323	0.953	0.812	1.38979400911819e-98
LYAR	6.69819490323603e-103	0.271981423538652	0.536	0.239	1.61895370811215e-98
TRPT1	7.13599160649855e-103	0.254539356794395	0.577	0.263	1.7247691712907e-98
PMF1	7.86902695598371e-103	0.264340701781037	0.746	0.438	1.90194381526126e-98
SSR2	8.27051225563387e-103	0.240075510314301	0.988	0.936	1.99898281218671e-98
CLK4	8.47211247028229e-103	-0.163697246480246	0.044	0.19	2.04770958406723e-98
PIK3C2A	9.44985944538418e-103	-0.339721590501943	0.37	0.554	2.28403102794936e-98
SHCBP1	3.61651260307634e-102	0.189860259939482	0.217	0.004	8.74111096163551e-98
TM7SF2	4.62212085631108e-102	0.234230747542199	0.357	0.092	1.11716661097039e-97
FBXO9	5.94456756916526e-102	-0.311412064817921	0.25	0.453	1.43680198146724e-97
NAP1L5	7.82062783729261e-102	-0.153149514762718	0.04	0.182	1.89024574827362e-97
HDAC7	1.10088829338225e-101	-0.334326084852	0.646	0.731	2.66084700510489e-97
TOMM22	1.30992904112295e-101	0.262828964965742	0.934	0.765	3.16609849239416e-97
CKS1B	1.51768874369867e-101	0.737332931713019	0.674	0.485	3.66825369351969e-97
MXI1	1.59333573122519e-101	-0.223174876093176	0.089	0.266	3.85109246237127e-97
RP11-783K16.5	1.81007996336993e-101	0.198557273816639	0.369	0.095	4.37496327146513e-97
ZNF521	2.29402604644684e-101	-0.334298755729015	0.402	0.579	5.54466095426202e-97
STARD3NL	2.31159877528861e-101	0.253531208935803	0.674	0.354	5.58713423987258e-97
FTX	2.66596735236781e-101	-0.137560740616852	0.03	0.159	6.443643090673e-97
MRPL35	3.2149820487934e-101	0.227108042043027	0.523	0.215	7.77061161193364e-97
ZNF568	4.67807345611746e-101	-0.161508963187531	0.042	0.184	1.13069035434359e-96
KIAA2026	7.46137982644164e-101	-0.287194515077957	0.217	0.421	1.80341550405094e-96
DIAPH3	7.50373886822383e-101	0.196436311355419	0.228	0.011	1.8136536844497e-96
EHD4	9.05752286844595e-101	0.284942496203041	0.717	0.419	2.18920327730339e-96
NUDT3	1.24607332821251e-100	-0.34527872211053	0.705	0.747	3.01175923428964e-96
RBM48	2.32412532959114e-100	-0.202380276471789	0.079	0.248	5.61741092162178e-96
ELF2	2.3738520466809e-100	-0.338407016783909	0.366	0.549	5.73760039682774e-96
MLYCD	3.10210849484318e-100	-0.146228850854156	0.037	0.175	7.49779623203595e-96
UQCRFS1	3.98379516586729e-100	0.261371571344293	0.944	0.798	9.62883291590123e-96
GEMIN7	4.38812912085275e-100	0.243634504274818	0.634	0.319	1.06061080851011e-95
KIAA1109	4.9428538726439e-100	-0.268575023587582	0.155	0.354	1.19468778101803e-95
CA8	5.24913721859881e-100	0.171977237783646	0.234	0.014	1.26871646573533e-95
CLSPN	8.14903102078268e-100	0.229378945672291	0.222	0.009	1.96962079772317e-95
NPM1	1.13376022435181e-99	-0.173380885427421	1	1	2.74029846225833e-95
TOMM40	1.46010150004566e-99	0.253622461941502	0.609	0.304	3.52906532561035e-95
WDR83OS	2.41661980615108e-99	-0.220178433434641	0.989	0.983	5.84097007146717e-95
ASF1B	2.42962455979481e-99	0.197077143684343	0.218	0.007	5.87240256102405e-95
IMP3	2.65958977821331e-99	-0.341487994498942	0.646	0.721	6.42822849394158e-95
GATA6	2.89095821104191e-99	-0.29597587554297	0.233	0.438	6.98744599608829e-95
SWAP70	2.94403776481342e-99	-0.351550455773393	0.643	0.732	7.11573927755403e-95
KDELR3	3.10784176900611e-99	0.255219333938085	0.607	0.295	7.51165355568777e-95
XRN1	3.71406694682615e-99	-0.273894751738613	0.176	0.376	8.97689981047881e-95
POLE4	3.90653713769818e-99	-0.329363175653722	0.743	0.803	9.44210026181649e-95
RRP7A	4.05812689772655e-99	0.261485255905245	0.681	0.372	9.80849271180507e-95
LRR1	4.8595280864166e-99	0.213491363591027	0.385	0.115	1.17454793848689e-94
RGS11	6.4925111522218e-99	-0.186349456340548	0.058	0.212	1.56923994549201e-94
RASSF2	6.89351759151484e-99	0.179605893860108	0.223	0.01	1.66616320186914e-94
EFHD2	7.02855126138558e-99	0.313718293509515	0.694	0.416	1.69880083987689e-94
CCDC124	7.27617516051471e-99	0.269415752309471	0.88	0.661	1.75865153629641e-94
GSS	9.95560560750851e-99	0.196846506441362	0.428	0.141	2.40626987533481e-94
ADK	9.96811340139073e-99	0.224903119188737	0.433	0.15	2.40929300911614e-94
SPCS2	1.16325938347726e-98	-0.308115830263551	0.808	0.853	2.81159792986453e-94
GABBR2	1.17713516501851e-98	0.171414811099157	0.204	0	2.84513569384975e-94
KIFC1	1.30602919415791e-98	0.210419690454445	0.226	0.012	3.15667256227966e-94
TIMM8A	1.7729469229811e-98	0.204150655859017	0.429	0.144	4.28521271284533e-94
SH3PXD2B	1.83312927385142e-98	0.175069373564666	0.271	0.037	4.43067345489887e-94
TMPO	2.6386637044955e-98	-0.319296808098174	0.39	0.602	6.37765017376562e-94
COMTD1	2.65531420702805e-98	0.189143321273255	0.344	0.084	6.41789443838679e-94
HMGN2	4.72172973441352e-98	-0.23409718098778	0.901	0.952	1.14124207680775e-93
UBALD2	6.39889433541664e-98	0.29146115719154	0.578	0.292	1.5466127608702e-93
IL11RA	8.06719468072188e-98	-0.236936259612186	0.114	0.296	1.94984095433048e-93
SLTM	8.12847076567999e-98	-0.347299723674998	0.524	0.646	1.96465138406485e-93
PPIL4	8.27636449346337e-98	-0.326496740668745	0.312	0.503	2.0003972980701e-93
ACBD6	8.90471094188633e-98	0.253077409086941	0.699	0.385	2.15226863465393e-93
SLF2	9.02024243042003e-98	-0.26341777578801	0.164	0.359	2.18019259543252e-93
CPQ	1.05546641365172e-97	-0.311377640539189	0.27	0.465	2.55106232179621e-93
TAGLN	1.05621902745616e-97	0.298904014679179	0.825	0.509	2.55288138936155e-93
PSMA3-AS1	1.0905790425483e-97	-0.328112229351473	0.336	0.521	2.63592954583925e-93
SLC52A2	1.12861675060292e-97	0.22148905563697	0.528	0.227	2.72786668620725e-93
HIP1	1.27317289683361e-97	-0.304071778225594	0.275	0.474	3.07725889164683e-93
DDX39B	1.44875855414607e-97	-0.205305773354383	0.077	0.244	3.50164942537106e-93
MECOM	1.53611504502342e-97	-0.355919692790225	0.434	0.587	3.71279006382162e-93
ATP1B1	1.63871863041607e-97	0.189375013338553	0.238	0.019	3.96078292971565e-93
PUSL1	1.86668780265569e-97	0.190400360073247	0.367	0.102	4.51178441901881e-93
SEC11A	2.03377806734245e-97	0.221662635117027	0.995	0.964	4.91564158876671e-93
CENPC	2.14034965379004e-97	-0.289872743185616	0.203	0.402	5.17322511321052e-93
BUD31	2.71873213934802e-97	0.245218201797463	0.939	0.77	6.57117558080416e-93
HMMR	5.06754351622484e-97	0.21736576737367	0.217	0.009	1.22482526787154e-92
UBA1	6.23982471971676e-97	0.252496724763869	0.651	0.354	1.50816563475554e-92
BANF1	7.05553739458702e-97	0.253297571649078	0.966	0.863	1.70532338827168e-92
SGOL1	7.71269075151939e-97	0.202623656817911	0.219	0.009	1.86415735464224e-92
FAM83D	8.88079368721992e-97	0.212164362956272	0.204	0.002	2.14648783420105e-92
NFIB	9.7663651291874e-97	-0.275722240944895	0.881	0.887	2.3605304517246e-92
CARM1	1.20690096222768e-96	0.216100559379396	0.463	0.178	2.9170796257043e-92
BHLHE40	1.22954562147038e-96	-0.350209541886799	0.298	0.489	2.97181176709391e-92
LSM2	1.30162496411834e-96	0.267336881688769	0.936	0.785	3.14602753827403e-92
A1BG	2.34533895009231e-96	0.197643591485244	0.217	0.01	5.66868424237311e-92
RBM43	2.9701760387627e-96	-0.209701487282888	0.09	0.263	7.17891548568945e-92
TDRD3	3.73397654760828e-96	-0.215356706334076	0.098	0.274	9.02502131556922e-92
TOMM20	5.28782946550365e-96	0.266162422545928	0.968	0.857	1.27806838181223e-91
PMPCA	6.32863060922555e-96	0.221641929400973	0.512	0.218	1.52963001824982e-91
CPLX1	8.61277384956045e-96	-0.252733679562737	0.158	0.356	2.08170743943876e-91
CERS6	1.06468148345084e-95	-0.256010394560667	0.137	0.322	2.57333514550068e-91
SLU7	1.2419716133408e-95	-0.333468033851312	0.392	0.558	3.00184538944472e-91
TGFBR3L	1.29432991697726e-95	0.15711926039081	0.198	0	3.12839540933404e-91
FAM124A	1.44707219463648e-95	-0.25424600510549	0.148	0.336	3.49757349443636e-91
MRPS5	1.45054180381784e-95	0.267738045360412	0.779	0.499	3.50595953982772e-91
LINC-PINT	2.05152300483446e-95	-0.130495918787978	0.027	0.147	4.95853110268489e-91
SSH2	2.23144827896731e-95	0.226267470129447	0.507	0.213	5.39341049026399e-91
FLNC	2.26911364971463e-95	0.179948805226291	0.304	0.061	5.48444769136027e-91
EHBP1L1	2.55590803721911e-95	-0.194527041716545	0.082	0.249	6.17762972595858e-91
ANGPTL4	4.1816718279969e-95	0.260065382233931	0.431	0.153	1.01071008082685e-90
AP2M1	4.9872105251208e-95	0.225464422102896	0.987	0.92	1.2054087839217e-90
ABCF1	5.92350908250574e-95	0.258300730503132	0.73	0.431	1.43171214524164e-90
CAPN1	5.9430249545881e-95	0.238534575120978	0.64	0.328	1.43642913152394e-90
SEC61A1	6.19472264776529e-95	0.272168150680535	0.766	0.478	1.49726446396487e-90
CPAMD8	6.40997502407211e-95	-0.190701298621604	0.069	0.229	1.54929096331823e-90
GPM6A	7.07343688146035e-95	-0.11939723687506	0.016	0.12	1.70964969424897e-90
CLEC11A	7.09330891464045e-95	0.184982342856583	0.3	0.061	1.7144527646686e-90
BYSL	7.3272255979654e-95	0.184288508209624	0.357	0.096	1.77099042702824e-90
CD200	7.65658629950887e-95	-0.181410426987599	0.063	0.22	1.85059690859129e-90
BCLAF1	8.08224650437098e-95	-0.348514428632907	0.56	0.669	1.95347898010647e-90
PKIA	9.52414694812498e-95	0.172583813590299	0.287	0.051	2.30198631736181e-90
MALL	1.20762495875628e-94	-0.381941989932612	0.61	0.732	2.91882952531393e-90
DHCR24	1.49037379529683e-94	0.188773563426225	0.243	0.026	3.60223346323243e-90
SCN8A	2.34151665862576e-94	-0.153158736569143	0.036	0.165	5.65944576389845e-90
SPCS3	2.47126255892533e-94	0.272460808086631	0.816	0.567	5.97304160492252e-90
DHFR	3.26837949115408e-94	0.2649078567514	0.349	0.101	7.8996732301194e-90
MED28	3.28956375659417e-94	0.251904843507888	0.86	0.6	7.95087559968811e-90
MYOM2	3.94590183134622e-94	-0.136043463485537	0.026	0.144	9.53724472636381e-90
CDC42BPB	3.98080109640774e-94	-0.330209211987428	0.442	0.596	9.62159625001751e-90
PCGF2	4.91461634168506e-94	-0.333964959316868	0.577	0.683	1.18786276978528e-89
RP11-680A11.5	6.90932223358852e-94	0.146793403513408	0.202	0.003	1.66998318385834e-89
ATF5	7.0378197227621e-94	0.213682486647499	0.443	0.165	1.7010410269916e-89
LIG1	7.20579381208786e-94	0.177591929890879	0.338	0.084	1.74164036438164e-89
CMSS1	9.57871659329539e-94	0.30905951228722	0.7	0.435	2.3151758005995e-89
PAXBP1	1.09333912130616e-93	-0.194169668281633	0.082	0.247	2.64260065619699e-89
GOLGA4	1.34771546846699e-93	-0.328456928139207	0.564	0.683	3.25742828728472e-89
SRSF8	1.73631671322033e-93	-0.325245402407089	0.375	0.549	4.19667749585353e-89
DHRS13	1.80477263376453e-93	-0.169545990092053	0.047	0.187	4.36213545580888e-89
BORCS7	1.84541191625237e-93	-0.335500512712487	0.499	0.628	4.46036060158198e-89
ARHGEF15	1.92772039140873e-93	-0.286508786523939	0.251	0.448	4.65930018603489e-89
TXNRD1	1.93615922785003e-93	0.311832143587054	0.632	0.351	4.67969685371352e-89
CCDC109B	1.98493670113916e-93	0.253383593539059	0.695	0.4	4.79759200665335e-89
RRP1B	2.70901066116081e-93	0.227070232689687	0.501	0.212	6.54767876802568e-89
PIN4	3.24162468987808e-93	0.264828976954403	0.869	0.644	7.83500687543532e-89
ATIC	3.38006558974596e-93	0.192645528894019	0.372	0.11	8.16961853041599e-89
RIMKLB	3.97980642705843e-93	-0.25725019316865	0.158	0.35	9.61919213420021e-89
TCF3	4.38707669920027e-93	0.206769497148145	0.422	0.151	1.06035643819671e-88
ZNF703	5.24466259250172e-93	-0.231231584270445	0.125	0.309	1.26763494860766e-88
MAN1A2	5.79384397696275e-93	-0.321651850580727	0.338	0.514	1.4003720892319e-88
ZNF292	6.62675001285428e-93	-0.310576410931148	0.248	0.44	1.60168547810688e-88
PCDH17	9.23199902859224e-93	-0.203458014679685	0.081	0.248	2.23137416521074e-88
CBR1	9.62900935427276e-93	0.225489295301381	0.444	0.168	2.32733156092773e-88
NOP16	9.64245995800431e-93	0.254041710255739	0.562	0.269	2.33058257184964e-88
ORC6	1.04960475882005e-92	0.17003579964888	0.206	0.006	2.53689470206806e-88
FPGS	1.09494925555794e-92	0.21119864952967	0.501	0.208	2.64649235068355e-88
RBL2	1.23231543446398e-92	-0.253264583699904	0.166	0.357	2.97850640509944e-88
MLST8	1.27449744273232e-92	0.224900748423772	0.573	0.274	3.08046031908402e-88
ABL2	1.32556911063171e-92	0.285072552849482	0.802	0.51	3.20390054039684e-88
PTPRA	1.5702450272954e-92	-0.323524927757643	0.324	0.504	3.79528223097297e-88
CAMLG	1.61105847435508e-92	-0.287904963773058	0.865	0.878	3.89392833251624e-88
DAZAP2	1.78382536590257e-92	-0.310668339647227	0.702	0.751	4.31150590938652e-88
NDUFA9	1.89229013084388e-92	0.265539352930845	0.719	0.434	4.57366524624966e-88
SETBP1	2.24738978963481e-92	-0.191062511553316	0.074	0.235	5.43194112154734e-88
SHROOM1	2.41244501080883e-92	-0.20702314872883	0.084	0.248	5.83087959112493e-88
N4BP3	2.59731146092728e-92	0.181058708323012	0.197	0.002	6.27770180106123e-88
CSTF3	2.60745586434796e-92	0.210670733638113	0.482	0.195	6.30222082412902e-88
JOSD2	3.186077995015e-92	0.258098779862166	0.78	0.492	7.70075051395124e-88
BTBD7	3.78611252508208e-92	-0.339505409586291	0.425	0.577	9.15103397312339e-88
CDK1	4.39249878792471e-92	0.563505744110217	0.344	0.116	1.0616669570414e-87
FAM136A	5.86357921552038e-92	0.227201244579998	0.615	0.309	1.41722709639128e-87
KAT2B	6.18341507444224e-92	-0.124585613371843	0.025	0.141	1.49453142349269e-87
CPNE3	6.47748208468015e-92	-0.336607830154832	0.52	0.645	1.56560741986719e-87
RILPL2	6.74082379911931e-92	-0.31850491409015	0.37	0.545	1.62925711224714e-87
CAMSAP2	8.27421744822372e-92	-0.293450765109933	0.238	0.429	1.99987835723567e-87
TMEM70	9.41537958982426e-92	0.248905629087664	0.608	0.31	2.27569724686052e-87
SIRPB2	1.18033794547656e-91	-0.131770666766019	0.027	0.144	2.85287681421685e-87
PPP2R5B	1.18612816799393e-91	-0.204348816133663	0.084	0.249	2.86687178204132e-87
LDLR	1.47623552313185e-91	0.192345826593382	0.315	0.074	3.56806125940969e-87
DPP3	1.52029776717983e-91	0.164958444142345	0.311	0.07	3.67455970327364e-87
ZNF148	1.76255142629953e-91	-0.30697541168334	0.293	0.479	4.26008679736596e-87
CENPU	1.79645933943765e-91	0.187646028735439	0.221	0.016	4.3420422234208e-87
PRKCDBP	1.81198775229794e-91	0.33913319304058	0.93	0.826	4.37957439730411e-87
COPZ1	2.13405339178741e-91	0.2553385478545	0.838	0.577	5.15800704795018e-87
SDHB	2.22396460794745e-91	0.270671930844158	0.788	0.528	5.37532245740898e-87
FXYD1	2.37780845359145e-91	0.175441183876796	0.296	0.06	5.74716303233053e-87
[truncated: 2,767 more rows]
