# Supplementary material for: Transcriptional drifts associated with environmental changes in endothelial cells
Source: eLife. 2023 Mar 27;12:e81370. doi: 10.7554/eLife.81370 (PMC10168696; doi:10.7554/eLife.81370)
Supplement: Supplementary file 9. [file elife-81370-supp9.xlsx]

## Sheet: all
symbol	Protein.statistic.t	Protein.p.value	Protein.fdr	RNA.statistic.t	RNA.p.value	RNA.fdr	Concordant
DDX21	-13.1753	4.43008e-08	7.04863e-05	-8.58177	1.84834e-06	1.88902e-05	1
VNN2	30.6587	9.96938e-08	7.04863e-05	7.73785	5.46114e-05	0.000237878	1
LTF	13.2073	1.11048e-07	7.04863e-05	6.08363	9.88875e-05	0.00037675	1
SPTA1	14.7219	1.60153e-07	7.04863e-05	0.802298	0.440995	0.501879	0
BCLAF1	-12.2765	1.92788e-07	7.04863e-05	0.167106	0.8714	0.893444	0
GCA	13.9757	2.19439e-07	7.04863e-05	6.01952	0.000130876	0.000470684	1
SPTB	12.5972	2.22657e-07	7.04863e-05	7.52936	1.19509e-05	7.4553e-05	1
RECK	11.2656	2.23081e-07	7.04863e-05	3.00674	0.0112766	0.019904	1
PTRH2	-11.3403	2.4067e-07	7.04863e-05	-11.834	4.1309e-06	3.34841e-05	1
CHTOP	-14.6705	2.59923e-07	7.04863e-05	-1.25402	0.234067	0.288393	0
HK2	-10.6016	4.80586e-07	0.000119466	-3.43879	0.00559658	0.0108892	1
LSS	-13.8735	5.75125e-07	0.000131006	-14.1251	9.86576e-08	2.55118e-06	1
THRAP3	-11.656	6.30459e-07	0.000131006	-9.77318	3.44357e-06	2.94271e-05	1
UTP4	-11.0609	6.58761e-07	0.000131006	-7.20312	1.09053e-05	6.98923e-05	1
TOR1AIP2	-10.7595	7.13033e-07	0.000132936	-4.5977	0.000667947	0.0017819	1
SHMT2	-9.32034	9.05678e-07	0.00015892	-9.65104	3.39669e-05	0.00016507	1
DDX18	-10.5162	1.12704e-06	0.000186776	-3.06917	0.0103599	0.0184794	1
EIF4A3	-9.16369	1.20077e-06	0.000188521	-5.83247	0.000229012	0.000735361	1
SRPRA	-9.4119	1.35957e-06	0.00019585	-3.40282	0.0119704	0.0209589	1
APOL2	-11.3578	1.37876e-06	0.00019585	-3.55232	0.00398466	0.00810456	1
MYO6	-11.5476	1.46102e-06	0.000198101	-8.74127	1.34414e-05	8.15972e-05	1
ACSL4	-10.2854	1.59652e-06	0.000199956	-6.30589	5.90699e-05	0.000251749	1
UTP14A	-11.3226	1.60876e-06	0.000199956	-11.9145	5.48788e-08	1.76711e-06	1
HBA1	8.57046	2.27945e-06	0.000271984	4.75823	0.000658352	0.00176001	1
RINT1	-9.80459	2.67878e-06	0.000300126	-9.10983	2.24349e-06	2.13944e-05	1
RPL3	-8.41108	2.76597e-06	0.000300126	2.88979	0.0173582	0.0291415	0
LGALS1	-10.7331	2.81714e-06	0.000300126	-8.95393	6.05938e-05	0.000257031	1
ANK1	10.0305	3.19721e-06	0.00031791	2.69278	0.0283109	0.0446373	1
RRP9	-15.6349	3.34108e-06	0.000321498	-9.00692	1.21968e-05	7.57508e-05	1
SRSF9	-13.4687	3.92956e-06	0.000366309	-4.31446	0.00215545	0.00478857	1
SELP	9.82342	4.39334e-06	0.000397132	6.56884	0.000437164	0.00125152	1
MMRN1	-8.37605	5.16705e-06	0.000453333	3.67855	0.0039202	0.00798758	0
SPTLC2	-7.79725	5.93361e-06	0.00048423	6.58994	2.59411e-05	0.000135045	0
NSDHL	-9.27945	6.05517e-06	0.00048423	-14.6377	6.05968e-09	4.37855e-07	1
COLGALT1	-7.75762	6.09278e-06	0.00048423	-7.52512	2.89874e-05	0.000147325	1
FTSJ3	-11.3116	6.16854e-06	0.00048423	-4.17611	0.00288033	0.0061213	1
HIST1H1B	-8.7246	6.69984e-06	0.000512452	-19.7322	2.05133e-07	4.30882e-06	1
PLOD2	-8.52982	6.93642e-06	0.000516277	-6.07897	5.8732e-05	0.000250731	1
SNCA	8.12917	7.096e-06	0.000516277	-0.307963	0.767273	0.803692	0
RBM25	-8.1167	7.68972e-06	0.000539462	-1.26347	0.24493	0.300024	0
SP100	-7.61567	7.77636e-06	0.000539462	7.56983	7.45769e-06	5.27124e-05	0
PDCD11	-7.68055	9.71558e-06	0.000658672	-8.44045	3.52621e-05	0.000170252	1
IGF2BP3	-8.57346	1.22657e-05	0.000813082	-16.1813	4.44503e-08	1.56069e-06	1
IGF2BP2	-7.6617	1.25797e-05	0.000815765	-4.65851	0.00300931	0.00636227	1
SLC4A1	9.79027	1.49083e-05	0.000926487	4.29541	0.00257071	0.00557002	1
SRRM2	-11.0052	1.68305e-05	0.0010246	0.486379	0.639681	0.691584	0
VPS37B	12.5441	1.85283e-05	0.0011054	-1.91686	0.0797531	0.111631	0
BMS1	-6.77832	2.03786e-05	0.00119195	-8.71997	1.22617e-05	7.60774e-05	1
AKAP12	-8.61536	2.13607e-05	0.00122536	-2.9001	0.0149496	0.0255283	1
NUP35	-9.27763	2.33197e-05	0.00127619	-7.31019	1.05479e-05	6.81894e-05	1
RPS24	-8.20294	2.33708e-05	0.00127619	-0.293355	0.776099	0.811525	0
POGLUT1	10.0801	2.35301e-05	0.00127619	5.06976	0.000340958	0.00102312	1
A2M	7.28411	2.42263e-05	0.00129048	7.31213	1.17253e-05	7.35469e-05	1
NSF	-7.42193	2.5705e-05	0.00134523	-3.12269	0.00883978	0.0161321	1
HSPB1	6.71215	2.63224e-05	0.00135379	2.58666	0.0350486	0.0540277	0
TBL3	-7.56994	2.73321e-05	0.00138189	-8.7002	2.92018e-06	2.60648e-05	1
PTPN1	-7.84102	2.89628e-05	0.00142091	-8.07485	1.99148e-05	0.000110207	1
DDX5	-6.64854	2.90658e-05	0.00142091	8.78315	1.53868e-05	9.05801e-05	0
SND1	-7.44058	2.95328e-05	0.00142091	-4.5853	0.000864673	0.00220974	1
GNL3	-8.88386	3.04745e-05	0.00144294	-7.76118	0.000117666	0.000432652	1
UTP11	-11.0311	3.27964e-05	0.00152862	-10.2503	3.65568e-06	3.07764e-05	1
BOP1	-7.80321	3.47441e-05	0.00159449	-10.59	5.87704e-06	4.39995e-05	1
JAK1	-7.30962	3.61444e-05	0.00163362	-5.01098	0.000322805	0.000974891	1
SLCO2A1	12.6735	3.80201e-05	0.00166066	8.36588	4.79646e-05	0.00021554	1
HEATR1	-7.6913	3.85522e-05	0.00166066	-14.2424	9.33782e-08	2.45482e-06	1
ADD1	6.96549	3.88226e-05	0.00166066	4.43024	0.00235425	0.00516294	1
PALM	120.604	3.93569e-05	0.00166066	4.01666	0.00187626	0.00424333	1
WDR36	-10.9323	4.01744e-05	0.00166066	-8.65863	8.25513e-06	5.68242e-05	1
RING1	8.6683	4.06396e-05	0.00166066	5.17028	0.000818689	0.00211358	1
NOP58	-9.34527	4.38482e-05	0.0017526	-8.35368	2.87225e-06	2.57403e-05	1
SF3B2	-7.36033	4.40647e-05	0.0017526	-7.55135	2.98447e-05	0.000150233	1
CYP51A1	-8.28978	4.70213e-05	0.00181923	-2.97801	0.0186963	0.0311113	1
GTPBP4	-7.8079	4.77007e-05	0.00181923	-9.44056	1.1602e-05	7.30251e-05	1
SH3BGRL2	8.1499	4.81649e-05	0.00181923	0.305984	0.769579	0.805773	0
CLPB	-7.00163	4.81795e-05	0.00181923	-8.38573	4.9874e-05	0.000221672	1
P4HA2	-7.37564	5.00075e-05	0.00186466	-3.41349	0.0101744	0.018218	1
HNRNPC	-6.13339	5.08795e-05	0.00187375	-6.51175	9.82176e-05	0.000374649	1
RANBP10	33.1568	5.26708e-05	0.00191606	1.86793	0.102558	0.139611	0
NAT10	-10.6862	5.38835e-05	0.00193656	-8.05805	1.45906e-05	8.71509e-05	1
MMP14	-9.63199	5.54114e-05	0.00195975	-6.97117	1.91023e-05	0.000106735	1
HCCS	-9.43322	5.6356e-05	0.00195975	-6.91463	5.56146e-05	0.00024092	1
RPL31	-8.25946	5.73695e-05	0.00195975	2.7448	0.0289527	0.0455753	0
WDR43	-9.30641	5.75077e-05	0.00195975	-11.0474	3.88381e-06	3.21196e-05	1
PLVAP	8.30243	5.78135e-05	0.00195975	9.00471	4.65125e-05	0.000210882	1
TGFBR2	-8.5754	6.27292e-05	0.0020901	-3.27819	0.0110948	0.0196297	1
PLOD3	-5.99075	6.30603e-05	0.0020901	-4.31119	0.00303784	0.00641507	1
LIMA1	-6.00951	6.5581e-05	0.00214976	0.0620693	0.951681	0.960185	0
NES	-6.47733	7.04512e-05	0.0022843	-8.03032	9.65328e-05	0.000369896	1
PXDN	-9.12003	7.17974e-05	0.00230292	-3.58119	0.00389106	0.00793715	1
SMARCA4	-7.3177	7.37895e-05	0.00234164	-6.32277	0.000371346	0.0010961	1
TMEM33	-6.04963	7.5372e-05	0.00236668	-11.2898	7.70749e-07	1.02916e-05	1
SON	-11.2285	7.81962e-05	0.00242978	1.78159	0.104634	0.142024	0
CD93	-6.35452	8.30679e-05	0.00255455	-1.30744	0.22809	0.282033	0
TMEM214	-6.83524	8.53787e-05	0.00258052	-2.45149	0.0447849	0.0671774	0
NOL11	-9.45357	8.63671e-05	0.00258052	-9.65441	8.409e-07	1.09345e-05	1
IKBIP	-6.21255	8.65077e-05	0.00258052	-6.66628	9.33473e-05	0.000360531	1
ENDOD1	8.39685	9.02541e-05	0.00263479	4.56527	0.000651253	0.0017462	1
ENG	-6.70581	9.10133e-05	0.00263479	0.366518	0.722086	0.764914	0
DKC1	-6.99037	9.23023e-05	0.00263479	-14.713	1.07123e-08	6.21362e-07	1
MAN2A1	-6.78926	9.33286e-05	0.00263479	-4.86519	0.000389746	0.00114241	1
SERPINE1	-7.44425	9.74437e-05	0.00269758	0.856082	0.413974	0.474545	0
RALGAPB	9.85524	9.80718e-05	0.00269758	0.958763	0.369116	0.429232	0
TIE1	-7.1274	9.95759e-05	0.00270032	-0.854368	0.409683	0.470094	0
COPA	-6.08217	0.000102336	0.002744	-3.59392	0.00404193	0.0082118	1
ELAVL1	-7.12253	0.000103026	0.002744	-8.5816	6.25905e-06	4.61222e-05	1
MTDH	-5.65998	0.00010604	0.00279927	-9.70037	4.9819e-07	7.61743e-06	1
PPME1	6.78314	0.000108128	0.00282936	-2.77767	0.0198271	0.0327132	0
LMCD1	6.15055	0.000110702	0.00287097	16.7463	8.88307e-09	5.55821e-07	1
AAAS	-6.18817	0.000111644	0.00287097	-8.77006	4.0143e-06	3.27913e-05	1
S100A13	-8.18527	0.000121639	0.00310127	-1.8274	0.0930762	0.127985	0
ATP1A1	-6.33525	0.000124691	0.00312565	-0.596582	0.564446	0.62259	0
CTGF	-7.80783	0.000127366	0.00316612	2.94146	0.012727	0.0221548	0
MARCKS	-6.10504	0.000129553	0.00319386	-7.62276	6.3215e-06	4.6447e-05	1
HHIP	-8.59086	0.000142846	0.00349271	-7.87397	4.41785e-05	0.000202258	1
S100A4	6.23229	0.000153901	0.0037324	5.83821	0.000311571	0.0009448	1
BST1	6.509	0.000155322	0.0037365	7.90961	4.23937e-06	3.42099e-05	1
RPS11	-6.44226	0.000158764	0.00376026	1.20121	0.254909	0.310591	0
ACSL3	-5.4154	0.000158831	0.00376026	-4.39166	0.00119892	0.00289539	1
MPP1	7.04699	0.000168988	0.00395414	0.435019	0.67859	0.727061	0
HMOX1	-6.14831	0.000169671	0.00395414	-6.25124	0.000282764	0.000872887	1
RAB32	-5.8005	0.000172856	0.00399713	-4.80108	0.00128086	0.00305939	1
MPHOSPH10	-10.1624	0.000174367	0.00400105	-5.20792	0.000219272	0.0007104	1
ADAM9	-6.65856	0.000185696	0.00413075	-16.3795	1.76326e-09	2.19016e-07	1
RALA	-6.5875	0.000187448	0.00413075	-10.4064	3.4181e-07	5.96987e-06	1
PIK3C2A	-6.08231	0.000187486	0.00413075	0.592501	0.568177	0.625781	0
BLVRB	6.51911	0.000187989	0.00413075	0.0601666	0.953923	0.962064	0
ADGRL4	-7.20706	0.000188156	0.00413075	-5.80682	0.000179953	0.00060551	1
BUD31	-5.75933	0.000188328	0.00413075	-3.53195	0.00905432	0.0164594	1
HSBP1	9.4657	0.000191014	0.00415908	-2.43104	0.0416329	0.0629421	0
UBAP2L	-6.82071	0.00020269	0.00438133	-4.09931	0.00367964	0.00757309	1
PGAM5	-7.36413	0.000209954	0.00447221	-12.9114	1.32692e-06	1.47702e-05	1
GRPEL1	-6.41001	0.000210116	0.00447221	-7.67403	8.83031e-05	0.00034399	1
MTHFD1L	-5.65901	0.000211392	0.00447221	0.089579	0.931033	0.943342	0
UTP20	-9.79261	0.000213017	0.00447486	-9.74838	5.72636e-07	8.33256e-06	1
ITGAV	-5.47106	0.000215106	0.00448715	-2.08764	0.0633143	0.0910093	0
HINT2	5.39697	0.000222664	0.00461255	0.484345	0.636868	0.688955	0
PHIP	-6.92312	0.000230548	0.00471347	5.11845	0.0002595	0.000814643	0
MANF	-6.27194	0.000230696	0.00471347	-5.15069	0.00148568	0.00347042	1
RPL8	-7.09711	0.000237559	0.00482067	-0.0312039	0.975894	0.980313	0
ALCAM	-5.26427	0.000253348	0.00510586	-1.52442	0.168839	0.21609	0
RPS3	-5.3648	0.000255036	0.00510586	-0.448081	0.667095	0.716445	0
TRAP1	-5.53252	0.000258786	0.00510686	-9.38129	5.74744e-05	0.000247114	1
ACIN1	-5.70284	0.000262843	0.00510686	-1.81938	0.104784	0.14217	0
APP	-5.11891	0.000263452	0.00510686	7.80516	4.95341e-06	3.83796e-05	0
ACSF2	12.2666	0.000263646	0.00510686	3.19642	0.00777264	0.0144495	1
EMC2	-5.72509	0.000270722	0.00521009	2.81679	0.0156798	0.0266493	0
AGPS	-5.26381	0.000279789	0.00527182	-8.79736	1.59288e-05	9.28948e-05	1
NUP93	-5.64662	0.000280115	0.00527182	-7.4243	3.56043e-05	0.000171446	1
RPS14	-6.03675	0.000280328	0.00527182	2.38594	0.0386112	0.0589161	0
EPB41	6.84954	0.000281429	0.00527182	1.63305	0.151315	0.196264	0
PRDX2	5.11122	0.000282766	0.00527182	-1.65757	0.144538	0.188558	0
SCP2	-5.03302	0.00029429	0.00544776	2.56707	0.0334811	0.0518516	0
ECI1	5.25009	0.000297236	0.00544776	-1.68162	0.124965	0.166108	0
AP1G1	-5.80165	0.000297682	0.00544776	-6.62494	2.50061e-05	0.000131422	1
CDC5L	-5.58944	0.000299886	0.00545463	-2.89633	0.0225592	0.0365392	1
SRP68	-5.08491	0.000312345	0.00564683	-2.3459	0.0398052	0.0604899	0
DHX30	-5.71908	0.000315814	0.00567298	-6.69907	0.000274373	0.000852233	1
RBM12B	-5.68144	0.00032039	0.00567298	-0.854081	0.410784	0.471272	0
RSL1D1	-13.1227	0.00032061	0.00567298	-9.40556	7.19066e-07	9.77697e-06	1
GTPBP1	8.79967	0.000321399	0.00567298	6.31055	6.20697e-05	0.000261711	1
P4HA1	-4.97655	0.000336091	0.00589741	-0.924747	0.388035	0.448347	0
EBNA1BP2	-8.46138	0.000345135	0.00600763	-15.4341	6.02996e-07	8.56934e-06	1
LAS1L	-6.85711	0.00034642	0.00600763	-6.04306	0.00019109	0.000633875	1
DNAJC19	-6.49547	0.000350116	0.00600763	-1.03904	0.322573	0.38128	0
PTPRB	-5.47619	0.000350428	0.00600763	18.1147	1.23175e-08	6.80152e-07	0
HBB	6.51805	0.000352573	0.00600986	4.77746	0.00074253	0.00194678	1
RPL27A	-6.31623	0.000356205	0.00603727	-0.450178	0.666237	0.715766	0
TAGLN	6.68782	0.000363156	0.0061039	8.9621	2.64651e-06	2.41406e-05	1
SQSTM1	-6.44342	0.000364229	0.0061039	-0.250821	0.807282	0.838171	0
CDC40	-5.08343	0.000368053	0.00612066	-2.18891	0.0546572	0.0801335	0
SNAP23	-4.89718	0.000369332	0.00612066	-5.99516	0.000171033	0.00058153	1
CD34	6.57438	0.000378412	0.00623648	7.18656	1.68167e-05	9.65306e-05	1
FNDC3B	-5.76654	0.000385236	0.00631406	3.1845	0.00835601	0.0153936	0
PHB2	-5.01915	0.000393881	0.00642048	-8.3906	1.46562e-05	8.74601e-05	1
GARS	-6.16314	0.00039989	0.00648301	-10.777	3.76153e-06	3.13337e-05	1
NONO	-5.01177	0.000412971	0.00665888	-10.0387	8.50388e-07	1.09726e-05	1
DDX3X	-5.02364	0.000415528	0.00666409	1.38624	0.191988	0.241874	0
RPL23	-6.57054	0.0004225	0.00673966	0.607785	0.559092	0.617713	0
ETHE1	5.01016	0.000425449	0.00675061	1.46918	0.178849	0.227451	0
EMC1	-4.89783	0.000427823	0.00675236	-13.4349	5.40089e-08	1.75113e-06	1
LONP1	-4.81953	0.000445869	0.0069817	-8.87532	3.49052e-06	2.97389e-05	1
PLOD1	-4.8186	0.000447035	0.0069817	-10.8693	1.45864e-07	3.42199e-06	1
PES1	-10.4428	0.000454287	0.00705801	-10.1929	3.99756e-06	3.27391e-05	1
COL1A1	5.58863	0.000459482	0.00710173	14.0238	1.07631e-08	6.21458e-07	1
YBX3	-6.68013	0.00047553	0.00730957	4.26636	0.00318409	0.0066793	0
YBX1	-5.38824	0.000480061	0.00730957	-7.15149	4.75278e-05	0.00021408	1
UTP6	-10.2972	0.000482373	0.00730957	-4.62503	0.00101346	0.00251377	1
MRPL48	5.8807	0.000484374	0.00730957	-5.85849	0.000123172	0.000447433	0
ITGA2	-5.59653	0.000486669	0.00730957	-10.8586	2.22589e-07	4.55443e-06	1
RPL7A	-5.64779	0.000487631	0.00730957	-0.674965	0.51601	0.576511	0
RAD21	-5.29689	0.000497524	0.00740524	-3.2757	0.00765439	0.0142737	1
FUS	-4.8894	0.000498979	0.00740524	-2.89364	0.0181441	0.0302995	1
ABCC1	-6.40771	0.000522686	0.00771867	-4.41397	0.00186477	0.00422658	1
PDZD8	6.12255	0.0005282	0.00776167	2.58503	0.0240475	0.0386379	1
FKBP8	-4.97566	0.00053904	0.00788214	1.85782	0.107277	0.145113	0
TPRG1L	-8.78549	0.000541952	0.00788606	1.21395	0.251238	0.306711	0
UTP15	-6.39246	0.000545719	0.00790233	-7.0733	4.86816e-05	0.00021775	1
RPL13	-5.00133	0.000557018	0.00800485	2.6969	0.0256583	0.0408781	0
NUP98	-5.65891	0.000559274	0.00800485	-6.35087	8.31569e-05	0.000327883	1
ICAM2	-5.671	0.00056085	0.00800485	-8.42175	3.87061e-06	3.20523e-05	1
GADD45GIP1	-6.00966	0.000570403	0.00810244	-7.39343	5.41646e-05	0.000236584	1
AKAP8	-5.66484	0.000580725	0.00820996	-6.18941	7.59663e-05	0.000305241	1
IGF2R	-4.62495	0.000586708	0.00824542	3.46628	0.00928689	0.0168238	0
SEC63	-4.62099	0.000591419	0.00824542	1.22656	0.243528	0.298653	0
ACAD9	-4.78607	0.000591526	0.00824542	-7.59841	7.79159e-06	5.44636e-05	1
NDUFAF4	-6.1263	0.000603078	0.00836735	-6.38475	3.56999e-05	0.000171658	1
ENTPD1	5.66802	0.000608457	0.00837533	12.1264	4.97022e-08	1.67596e-06	1
CCDC47	-4.78245	0.000609268	0.00837533	1.02557	0.325695	0.384467	0
SLC2A1	5.46332	0.000620134	0.00848559	3.45883	0.0114046	0.0200991	1
NRCAM	-6.36652	0.000638379	0.00869537	-15.3389	8.31575e-07	1.08629e-05	1
GBA	-4.79252	0.000648079	0.00875066	-5.00832	0.00113648	0.00276842	1
PTPRF	-7.55134	0.000648306	0.00875066	-1.09492	0.303416	0.361339	0
FXR1	-4.86348	0.000668513	0.00898276	-1.35318	0.218656	0.271922	0
RDH11	-5.88097	0.000687465	0.00915715	-4.40667	0.0021483	0.00477757	1
ACOX3	-5.47746	0.000687631	0.00915715	-0.195229	0.848492	0.873214	0
SSR4	-5.0827	0.000699787	0.00927761	-0.813126	0.441403	0.502209	0
MFN1	-4.66167	0.000709618	0.00936633	-2.66876	0.0205529	0.0337565	1
PIGT	-5.32279	0.000718933	0.00941372	0.881439	0.395472	0.455482	0
MACF1	-5.87758	0.00071952	0.00941372	2.11614	0.055955	0.0817411	0
IGFBP7	-7.16209	0.000724962	0.00944351	6.05935	0.000254419	0.000800879	0
EFEMP1	-4.85609	0.000732786	0.00950392	9.02376	1.21553e-06	1.39099e-05	0
ISCU	6.72218	0.000743579	0.00960215	3.74856	0.00277885	0.00594259	1
DNTTIP1	10.9918	0.000761213	0.00978749	-2.20547	0.0491672	0.0729375	0
EIF4A1	-4.47942	0.000772943	0.00987404	2.00456	0.0865406	0.119924	0
OTC	4.98432	0.000776083	0.00987404	6.51173	0.00030738	0.000934332	1
FECH	5.22651	0.000777875	0.00987404	0.658114	0.53434	0.594364	0
MRPL37	-4.77745	0.00078256	0.00989143	-18.372	5.38657e-08	1.75113e-06	1
FLOT2	5.43908	0.000787632	0.00990382	7.27833	1.98837e-05	0.000110131	1
HNRNPM	-5.03364	0.000790181	0.00990382	-4.57888	0.000635565	0.00171286	1
KARS	-4.93397	0.000796084	0.00993606	-8.13437	0.00011813	0.000433477	1
OPA1	-4.51209	0.000804649	0.0100011	-3.52115	0.00855969	0.0157121	1
MCAM	-5.64634	0.000815633	0.0100761	-6.50403	9.70928e-05	0.000371479	1
FLOT1	5.31341	0.000818759	0.0100761	2.8215	0.0163638	0.0276668	1
ITGAM	4.7702	0.000821552	0.0100761	8.53581	2.12303e-06	2.06664e-05	1
HSPH1	-4.61353	0.000829774	0.0100761	-7.3574	8.77904e-06	5.93642e-05	1
UTP18	-5.57308	0.000833706	0.0100761	-6.11146	6.32923e-05	0.000265272	1
HSD17B4	-4.42509	0.000833879	0.0100761	-0.153757	0.882204	0.90189	0
RTN4	-4.57862	0.000834325	0.0100761	-10.4585	5.0316e-07	7.66561e-06	1
TOR1AIP1	-4.49377	0.000856644	0.0103039	3.8765	0.00238871	0.00522221	0
IGF2BP1	-5.12216	0.000885513	0.0106084	-2.52761	0.0357316	0.05496	0
NUP155	-4.95332	0.000893345	0.0106417	-12.004	6.27025e-08	1.92445e-06	1
EIF4G2	-4.41488	0.000898694	0.0106417	-16.6581	1.45237e-09	2.01815e-07	1
TRMT10C	-4.86519	0.00090158	0.0106417	-7.75017	5.71405e-06	4.30597e-05	1
NNMT	5.17142	0.000902564	0.0106417	10.9409	1.90142e-07	4.11e-06	1
ARL15	5.10546	0.000923946	0.0108131	4.37682	0.00174742	0.0039928	1
VPS45	-5.14767	0.000925023	0.0108131	1.23214	0.241647	0.296577	0
RRP1	-5.60975	0.000927977	0.0108131	-7.04842	3.15701e-05	0.000156122	1
CAD	-4.6486	0.000932782	0.0108268	-7.53328	5.94561e-05	0.000252969	1
EPB42	5.21729	0.000949401	0.010977	3.24278	0.0140141	0.0241232	1
RPL7	-4.33983	0.000967295	0.0111206	-0.40081	0.698314	0.744346	0
RPL24	-6.90893	0.000969282	0.0111206	0.283942	0.784404	0.818719	0
SARS2	6.50122	0.000975817	0.0111527	-2.55677	0.041168	0.0623063	0
EEF2	-4.70589	0.000984262	0.0112063	1.67324	0.133284	0.175524	0
FUCA1	5.23123	0.000993516	0.0112687	7.02262	0.00012981	0.000467248	1
RPS7	-5.4943	0.00101807	0.0115035	-3.09222	0.0179707	0.0300475	1
CRNKL1	-4.35637	0.00109038	0.0122279	1.43779	0.188282	0.237703	0
CUX1	30.1254	0.0011105	0.0123605	11.4154	4.31426e-07	6.89682e-06	1
MYO1E	-5.40332	0.0011176	0.0123933	-3.84072	0.00285368	0.00607386	1
EIF5B	-4.94786	0.00112243	0.0124008	-4.78451	0.00048042	0.00135571	1
GPX8	-4.84555	0.00113385	0.0124672	-4.85132	0.00157948	0.00366604	1
NOP16	-5.68891	0.0011368	0.0124672	-12.2752	4.60645e-07	7.23584e-06	1
PVR	-9.00793	0.00114144	0.0124722	-6.86605	3.00479e-05	0.000151016	1
ABLIM1	4.39127	0.00116781	0.0127138	10.2528	1.89408e-06	1.90816e-05	1
HSPA12B	5.00249	0.00117243	0.0127177	4.00224	0.00182227	0.00413839	1
EPHA2	-10.028	0.00117736	0.0127249	-7.62956	3.98153e-05	0.000186317	1
SPTLC1	-4.5427	0.00118752	0.0127883	-0.0759887	0.940963	0.951573	0
THBD	4.50091	0.00119199	0.0127903	8.51017	2.75524e-05	0.000141799	1
FAM120A	-4.58896	0.00119755	0.0128039	-4.68882	0.00107194	0.00263453	1
TECR	-4.22423	0.00126147	0.0133944	-3.39552	0.00566572	0.0110017	1
DDX1	-4.17335	0.00129396	0.013645	-6.28448	4.18998e-05	0.000193932	1
CPD	-5.37208	0.00129451	0.013645	8.75432	7.47976e-06	5.28093e-05	0
AGRN	-5.76023	0.00134031	0.01402	9.57422	9.35524e-07	1.15977e-05	0
OSBPL3	-5.72962	0.00134419	0.01402	-7.23523	6.87242e-05	0.000282699	1
EIF4G1	-4.57559	0.00135801	0.0141148	-9.77233	1.10326e-05	7.04226e-05	1
RPL4	-4.4111	0.00137546	0.0142465	0.238896	0.818012	0.848104	0
NUP153	-5.23796	0.00139396	0.0143881	-4.77556	0.00122315	0.00294268	1
EHD4	-4.60368	0.00140212	0.0144225	-10.6731	5.1758e-06	3.9786e-05	1
MAP1B	-4.3504	0.00142924	0.014651	-9.6626	3.32032e-05	0.000161981	1
RPL6	-4.80113	0.00144338	0.0147012	-1.93142	0.0906297	0.12492	0
RRAS2	-4.35614	0.001444	0.0147012	-6.98018	1.57735e-05	9.22128e-05	1
POGZ	-5.60776	0.00145365	0.0147415	3.29963	0.00929672	0.0168371	0
DBN1	-5.09611	0.00145784	0.0147415	-6.45544	4.74989e-05	0.00021408	1
TOR2A	4.57442	0.00146834	0.0147975	-10.6305	3.56895e-07	6.13977e-06	0
RPL27	-4.83187	0.00147469	0.0148114	-4.12457	0.00142448	0.00334912	1
ALDH18A1	-4.17268	0.00148128	0.0148277	-0.328083	0.749084	0.788099	0
ITGA5	-4.10577	0.00148757	0.0148409	-3.43504	0.0111719	0.0197495	1
ATP8A1	4.69365	0.00151885	0.0150523	16.3603	2.14389e-08	9.51212e-07	1
TARDBP	-4.10415	0.00152616	0.0150746	-2.80359	0.0216542	0.0352676	1
CTNND1	-4.30041	0.00154549	0.0152045	2.53707	0.0262101	0.041668	0
HIST1H4I	-4.86581	0.00154951	0.0152045	-14.3882	6.0394e-08	1.88099e-06	1
SAFB2	-4.78692	0.0015679	0.015306	-3.16826	0.0085971	0.015762	1
OCIAD2	-5.2685	0.00157014	0.015306	-4.8121	0.0004873	0.00137389	1
FAM98A	-4.42264	0.00157975	0.015306	-13.6259	5.18783e-08	1.72632e-06	1
RPL18A	-4.50562	0.00158037	0.015306	-2.67013	0.0211743	0.0346287	1
SLC12A4	-5.43064	0.0016031	0.0154759	0.109276	0.914878	0.929207	0
SF3A1	-4.44643	0.00162271	0.0156146	-0.994372	0.34678	0.40636	0
GNL2	-5.12643	0.00165641	0.0158236	-9.81556	9.70574e-07	1.1927e-05	1
RGS19	10.8459	0.00166034	0.0158236	-1.1403	0.290128	0.347478	0
PRKRA	-4.45338	0.00167421	0.015905	-4.26962	0.00108923	0.00266924	1
ASL	22.4658	0.00168306	0.0159286	-4.15954	0.0016002	0.00370393	0
DDAH2	6.70235	0.00169097	0.0159286	3.99877	0.0017712	0.00403982	1
RANBP2	-5.31924	0.00169345	0.0159286	0.541586	0.598186	0.653652	0
LAMTOR2	-5.11386	0.00169806	0.0159286	-2.29987	0.0474465	0.0706681	0
PITRM1	-4.1398	0.00173163	0.0161462	-11.3609	1.714e-06	1.8006e-05	1
PMPCA	-4.01136	0.00173208	0.0161462	-10.0169	3.93244e-06	3.23314e-05	1
PSMD4	-5.0301	0.00177321	0.0164345	-2.84845	0.0159864	0.0271012	1
INPP1	4.79871	0.00177402	0.0164345	-1.09109	0.305146	0.363331	0
FAM213A	-3.99066	0.00179174	0.0165473	-2.17443	0.0514406	0.0759358	0
DHCR7	-5.77597	0.00181053	0.0166303	-10.0997	9.11615e-06	6.10237e-05	1
RPS28	-3.98867	0.00181188	0.0166303	0.361643	0.725907	0.768446	0
CAPRIN1	-4.51164	0.00181924	0.0166466	-14.6024	6.14189e-09	4.38516e-07	1
ITGB2	5.18002	0.00183735	0.0167307	6.67765	3.24132e-05	0.000159171	1
LUZP1	-4.86288	0.00183965	0.0167307	-2.76492	0.0177979	0.0298007	1
RER1	-5.08493	0.00187525	0.0170027	-8.61328	2.47081e-06	2.299e-05	1
GRSF1	-5.66051	0.00189062	0.01709	-8.90186	1.60548e-06	1.7017e-05	1
MATN2	4.46182	0.00190807	0.0171439	8.94668	7.67768e-05	0.000308009	1
RPS6	-4.55068	0.001935	0.0173337	1.87486	0.100568	0.137065	0
ERH	-4.34034	0.00195247	0.0174378	-6.22789	0.000133287	0.00047705	1
MBD2	-5.30247	0.00196384	0.0174762	-9.42185	7.5549e-07	1.01738e-05	1
TJP2	-4.24715	0.00196849	0.0174762	-4.232	0.00350246	0.00725091	1
CD9	-3.93364	0.00198601	0.0175794	-2.17627	0.0507243	0.0749836	0
PLXND1	-4.03295	0.00199399	0.0175978	1.34443	0.207156	0.259074	0
RPS16	-4.46299	0.00201748	0.0177231	0.993546	0.340569	0.400067	0
GNG12	-4.65382	0.00202007	0.0177231	-2.02595	0.0656439	0.0939203	0
ECI2	-4.02618	0.0020287	0.0177467	-12.4748	5.75795e-08	1.8351e-06	1
RPS18	-4.48727	0.00210353	0.0183475	2.54187	0.0369578	0.0565914	0
PNN	-5.10231	0.00213507	0.0185683	-5.35833	0.000853569	0.00218844	1
NUDC	-4.52601	0.00217832	0.0188893	-12.3614	1.52065e-06	1.63962e-05	1
GOLGA2	-4.04942	0.00225213	0.0194727	7.25136	0.000179463	0.000604021	0
SH3BGRL	8.53851	0.00228112	0.0196664	8.01183	8.1601e-05	0.000322956	1
RPF2	-4.66615	0.00230617	0.0197681	-5.65174	0.000144393	0.00050902	1
HNRNPD	-3.9877	0.0023526	0.0201083	-1.35055	0.201839	0.25306	0
HDLBP	-3.83585	0.0023788	0.0202741	-5.93645	0.000347896	0.00104048	1
MRPL49	-3.83807	0.00239793	0.020379	-7.57238	8.80829e-06	5.95301e-05	1
FCGRT	4.30965	0.00248546	0.0210628	15.2145	1.52752e-08	7.76197e-07	1
HK1	-4.09036	0.00251741	0.0212732	-2.44144	0.0494974	0.073393	0
DNAJC3	-4.32427	0.00253181	0.0213344	2.34301	0.0430562	0.0648536	0
ACOT9	-4.36363	0.00257997	0.021679	-6.62238	0.000147553	0.000517705	1
GALNT1	-3.87535	0.00258787	0.0216844	-5.09037	0.000276235	0.000857177	1
ADAM10	-3.85136	0.00259808	0.0217089	1.53397	0.153882	0.199001	0
CLPX	-4.59745	0.00260632	0.0217169	-2.25052	0.0589579	0.0855153	0
UPF1	-3.77682	0.00266394	0.0220984	-5.1819	0.00128272	0.00306211	1
RPS8	-3.85744	0.00267505	0.0220984	1.72455	0.121453	0.16183	0
GOLGA3	-4.59245	0.00268173	0.0220984	0.929416	0.37968	0.439819	0
WDR12	-6.38555	0.00269622	0.0221566	-8.2676	0.00010889	0.000407229	1
GAR1	-3.87973	0.00270925	0.0222025	-2.10014	0.0737608	0.104108	0
PFDN5	4.31154	0.00271674	0.0222029	3.72057	0.00366163	0.00754092	1
SFXN1	-3.81892	0.00273425	0.022259	-16.2674	6.79667e-07	9.41335e-06	1
EHD2	3.76168	0.00273854	0.022259	-0.367774	0.720727	0.763986	0
NOP2	-8.9747	0.00276062	0.0223275	-4.18544	0.00191301	0.00431732	1
SF3B1	-3.91492	0.00276926	0.0223275	3.35823	0.00724763	0.0135954	0
LARS	-3.79233	0.00276942	0.0223275	-5.4256	0.000279427	0.00086496	1
GLRX5	5.98422	0.00278317	0.0223779	-1.06062	0.326936	0.38585	0
UBE2O	4.31036	0.00279174	0.0223864	-0.0314146	0.975886	0.980313	0
ARCN1	-4.38439	0.00281611	0.0225024	-9.1504	9.31564e-06	6.19654e-05	1
CSNK2A1	5.01721	0.00282129	0.0225024	-12.9293	2.96047e-08	1.1797e-06	0
GUSB	4.06617	0.00283519	0.022553	0.738382	0.476833	0.537202	0
SCRIB	-4.24138	0.00287186	0.0227235	-8.51916	1.52469e-05	9.00082e-05	1
RPL35A	-4.4351	0.00289424	0.02284	-0.193683	0.851182	0.875627	0
LRPAP1	-4.03923	0.00294727	0.0231971	-0.513952	0.618444	0.672476	0
CPNE2	-3.91172	0.00302929	0.0237799	-8.34016	3.12707e-06	2.75553e-05	1
ZYX	-4.61442	0.00305296	0.0239028	-3.56423	0.00419366	0.00847513	1
NBAS	-4.29314	0.0030856	0.0240951	1.27099	0.230336	0.284407	0
ANXA3	4.06117	0.00310209	0.0241076	2.70434	0.0196777	0.0325048	1
COL3A1	4.05298	0.00310336	0.0241076	11.8198	2.08661e-07	4.354e-06	1
GPI	-4.477	0.00312687	0.0241867	-9.62732	1.53802e-06	1.65096e-05	1
SLC27A1	5.30956	0.00312976	0.0241867	11.4511	2.0088e-06	1.99777e-05	1
TRIP11	-4.62716	0.00317641	0.0244355	3.8344	0.0043642	0.0087707	0
RPS20	-3.99587	0.00317834	0.0244355	1.45672	0.185455	0.234646	0
SEC24A	-4.75316	0.00322309	0.0247159	-3.58272	0.00512567	0.0101035	1
EMC8	-3.74267	0.00325108	0.0248666	-14.5606	2.0662e-06	2.03166e-05	1
NIPSNAP3A	3.74746	0.00326485	0.0248777	-0.416616	0.68718	0.734457	0
DOCK4	-6.32817	0.00326921	0.0248777	-4.86422	0.000389161	0.00114128	1
SAFB	-3.86267	0.00333846	0.0253305	-2.52828	0.0303748	0.0475533	1
FYN	6.08477	0.0033457	0.0253305	-2.1506	0.0585425	0.0850299	0
PTGIS	3.95457	0.00336116	0.0253376	13.149	8.83261e-07	1.11725e-05	1
U2SURP	-5.18012	0.00336394	0.0253376	-3.32424	0.00958564	0.0173182	1
CKAP4	-3.81713	0.00337212	0.0253376	-13.8396	1.85758e-06	1.89021e-05	1
HNRNPK	-4.11056	0.00341656	0.025607	-4.80228	0.00114751	0.00279144	1
CPT1A	-3.61759	0.0035379	0.02645	-0.231851	0.821377	0.850919	0
STUB1	-3.68567	0.00360572	0.026777	-6.51706	7.28566e-05	0.00029509	1
CELSR1	6.4726	0.00362025	0.026777	12.7114	2.53942e-08	1.05977e-06	1
P3H3	-3.95273	0.00362333	0.026777	-1.68672	0.118304	0.158034	0
DHX9	-3.68519	0.00362615	0.026777	-10.9817	3.5987e-07	6.15085e-06	1
RALY	-4.23841	0.00364216	0.026777	-1.75655	0.115495	0.154814	0
KANK2	6.2367	0.00364353	0.026777	7.53777	1.6311e-05	9.45432e-05	1
HGS	-3.88037	0.00364448	0.026777	-5.89281	0.000138765	0.000492751	1
RAB24	4.59921	0.00369687	0.0270155	1.6567	0.132175	0.174335	0
MRPS23	-3.83745	0.00370199	0.0270155	-4.76337	0.00144189	0.00338269	1
RPS3A	-4.09121	0.00370891	0.0270155	1.37984	0.211639	0.264157	0
HMOX2	-3.59008	0.00379969	0.0275778	-3.91105	0.0039858	0.00810557	1
GNL1	15.4746	0.00382983	0.0277291	3.63735	0.00634744	0.0121272	1
CEP170	-4.32198	0.00389712	0.028148	-15.0845	3.81634e-09	3.42253e-07	1
FXN	4.24085	0.00394218	0.0283635	-2.89044	0.0209978	0.034389	0
NCSTN	-3.58594	0.00394598	0.0283635	6.67356	2.29443e-05	0.000122989	0
FBL	-3.75412	0.00396181	0.0284089	-8.63333	2.83996e-06	2.55233e-05	1
RPS9	-3.89394	0.00398751	0.0285246	1.12716	0.29324	0.350839	0
WDR3	-4.11337	0.00401127	0.0285861	-6.70329	0.000105403	0.000396791	1
SLC25A3	-3.92999	0.00401528	0.0285861	-4.51119	0.00223302	0.00493214	1
MRPL41	-4.39915	0.00406511	0.0288719	-4.82588	0.000862279	0.00220451	1
DNAJB12	-3.821	0.00408392	0.0289367	-1.20484	0.264389	0.320383	0
CD59	-4.14651	0.00412967	0.0291632	1.06601	0.309302	0.367724	0
FDFT1	-4.67049	0.00413544	0.0291632	-6.89085	1.87384e-05	0.000104983	1
AIFM1	-3.53778	0.00416244	0.0292843	-9.67073	5.40834e-07	8.05376e-06	1
GFPT1	-4.68847	0.00418221	0.0293542	-2.14936	0.0601921	0.0870159	0
NCBP1	-3.56079	0.00419476	0.0293732	-11.9025	3.44614e-07	5.98926e-06	1
UFL1	-3.82478	0.00420743	0.0293766	1.64126	0.135745	0.178411	0
ETFDH	-3.69653	0.00421494	0.0293766	-4.1715	0.00144972	0.00339853	1
ITIH3	3.95237	0.00422698	0.0293918	17.6424	5.08922e-09	4.12521e-07	1
DDX56	4.27183	0.00425061	0.0294432	-10.14	1.17911e-05	7.38474e-05	0
MIA3	-3.79935	0.00425411	0.0294432	7.8774	2.93275e-05	0.00014816	0
NCEH1	-3.55796	0.0043272	0.0298797	-8.66676	1.6927e-06	1.7822e-05	1
WDR37	5.92689	0.00435255	0.0299854	0.343851	0.739299	0.779491	0
ATP11C	-4.9713	0.00440156	0.0301862	-4.59395	0.00142957	0.00335752	1
RTCB	-3.87576	0.00440194	0.0301862	-4.6334	0.00223006	0.00492647	1
BAX	-3.69204	0.00441875	0.030232	-16.1324	1.98537e-08	9.03057e-07	1
WDR75	-3.90685	0.00446861	0.0304702	-12.0023	4.8365e-08	1.64402e-06	1
LGALS9	4.55451	0.004474	0.0304702	6.64975	2.96443e-05	0.000149462	1
ATP6V0A1	3.60967	0.00451119	0.0306535	4.42489	0.00250182	0.00543847	1
NUP37	-4.08851	0.00453103	0.0306761	-7.02358	0.000282886	0.000872887	1
MRPS18A	4.33951	0.00453723	0.0306761	-4.07597	0.00253114	0.00549748	0
OAT	-3.48584	0.00454538	0.0306761	-3.37174	0.00623864	0.0119578	1
SEC22A	4.99797	0.00463219	0.0311798	-1.27189	0.244619	0.299724	0
TMOD1	7.358	0.00464091	0.0311798	9.40059	8.87526e-07	1.12081e-05	1
PRPF38A	-4.18249	0.0047031	0.0315266	-0.686042	0.507403	0.567747	0
EXOC3	4.04822	0.00473229	0.0316512	0.802056	0.438941	0.500262	0
CREG1	7.08547	0.00475271	0.0317166	7.46417	1.75849e-05	9.99828e-05	1
NUP205	-3.83069	0.00480182	0.0319391	-16.2149	7.39312e-09	4.90515e-07	1
SNAPIN	4.86569	0.00480746	0.0319391	-4.1051	0.00234334	0.00514257	0
RANGAP1	-3.6171	0.00490455	0.0325117	-15.0124	6.22653e-09	4.38516e-07	1
PPIG	-3.51575	0.00498455	0.0329526	1.78264	0.116775	0.156223	0
HSPA2	3.97255	0.00499871	0.0329526	10.6687	1.82043e-07	4.01035e-06	1
AXL	-4.69327	0.00500575	0.0329526	-16.1143	8.55166e-08	2.33554e-06	1
SNRPD2	-3.90065	0.00501524	0.0329526	-4.81413	0.00112225	0.00273902	1
PSMD3	-3.51828	0.00505303	0.0331279	-13.2252	2.62852e-07	4.99813e-06	1
RPA3	3.78407	0.00516982	0.0338192	-5.21761	0.000314744	0.000953735	0
ELMSAN1	7.61715	0.00518415	0.0338388	7.93335	5.105e-05	0.000225556	1
CAVIN3	-3.4785	0.00522285	0.034017	-3.91847	0.00298697	0.00631926	1
GNPAT	-4.08566	0.00526218	0.0341985	-5.32276	0.000772997	0.00201122	1
ALYREF	-3.58949	0.00537742	0.0347374	-7.75062	2.03454e-05	0.000112197	1
STXBP3	-3.97942	0.00539978	0.0347374	2.06598	0.0701515	0.0995585	0
SLC39A14	-3.63854	0.00541328	0.0347374	-3.00501	0.0212927	0.0347728	1
MTHFD1	-3.97026	0.00541541	0.0347374	-17.0462	1.05736e-09	1.71414e-07	1
NDUFB10	-3.8573	0.00541823	0.0347374	-8.18551	2.9764e-06	2.64859e-05	1
MRPL9	-3.76716	0.00542231	0.0347374	-7.61224	3.42841e-05	0.000166164	1
BGN	3.6094	0.00543425	0.0347374	10.5836	2.38416e-07	4.7402e-06	1
PTPRC	3.85725	0.00543827	0.0347374	7.57213	6.83571e-06	4.94212e-05	1
CLU	3.58184	0.00546603	0.0348401	11.1062	5.48787e-06	4.17534e-05	1
ELMO1	3.76917	0.00548497	0.0348863	6.73836	2.08017e-05	0.000114215	1
ZNF326	-5.4283	0.005578	0.0353006	2.63518	0.0321555	0.0500808	0
PPP2CB	4.58105	0.00558561	0.0353006	-4.10721	0.00248064	0.00540077	0
RPL37A	-3.93792	0.0056337	0.0355293	0.0129434	0.990016	0.991731	0
LRPPRC	-3.62276	0.00569998	0.0358714	-10.2487	4.95641e-06	3.83796e-05	1
SEC31A	-3.89712	0.00573434	0.0360117	-5.23145	0.000414928	0.00120173	1
PTBP1	-3.56715	0.00576276	0.0361141	-10.379	1.30243e-05	7.96769e-05	1
COMMD2	12.4589	0.00579512	0.0362407	-1.56704	0.158554	0.204332	0
SLC25A6	-3.50991	0.00581684	0.0362579	-1.32145	0.213248	0.265929	0
TPD52L2	-3.56694	0.00582218	0.0362579	-10.7506	4.04982e-07	6.61619e-06	1
HADH	3.45392	0.00586684	0.0364599	-2.61446	0.0229413	0.0370535	0
NOP14	-3.92666	0.00590122	0.0365932	-17.0187	1.38569e-09	2.01081e-07	1
AFAP1	-3.94436	0.00591282	0.0365932	3.9595	0.00211093	0.0047102	0
CTNNA1	-3.74413	0.00594756	0.036732	0.475357	0.649985	0.701106	0
MFN2	-3.42793	0.00599888	0.036892	-6.01944	0.000585999	0.00160319	1
SART3	3.48998	0.00601612	0.036892	-5.48948	0.000303748	0.000924403	0
CD200	8.41533	0.00602292	0.036892	9.04069	5.72166e-06	4.30677e-05	1
TSFM	-3.50294	0.0060553	0.0369985	-8.48257	2.05608e-06	2.02861e-05	1
RBM14	-3.74127	0.00606513	0.0369985	-6.6412	0.000114061	0.00042148	1
GNAI1	4.32369	0.00608388	0.0370291	2.04031	0.0824151	0.114862	0
PBRM1	-3.72579	0.00609496	0.0370291	-2.65133	0.0211845	0.0346365	1
MED4	5.19838	0.00612022	0.0371007	1.03103	0.324094	0.382864	0
RPL18	-3.38489	0.00613162	0.0371007	-0.586782	0.570645	0.628171	0
HSPA4	-3.33519	0.00625475	0.0377691	-11.7432	2.49073e-07	4.82377e-06	1
TIMM9	-3.33226	0.00631561	0.0380595	-1.31885	0.216639	0.269785	0
ALDH6A1	3.53991	0.00649402	0.0390557	4.11101	0.00254087	0.00551386	1
PPA2	3.6875	0.00653222	0.0392065	-2.77218	0.0246058	0.0393898	0
PPP1R9B	-3.78005	0.00655863	0.0392859	-0.735879	0.480385	0.540818	0
LRRC59	-3.28184	0.00659165	0.0394046	-12.8332	8.59939e-07	1.10172e-05	1
RPL5	-3.52391	0.00666999	0.0397931	-0.133753	0.897393	0.914828	0
DHX15	-3.46183	0.00670422	0.0399175	-8.30778	2.02212e-05	0.000111617	1
PLS3	-3.26878	0.00672527	0.0399631	-7.38766	1.14029e-05	7.22034e-05	1
HNRNPA3	-3.27044	0.00674644	0.0400092	0.213829	0.835789	0.862528	0
LGALSL	3.66247	0.00678796	0.0400992	5.50213	0.000369687	0.00109196	1
PRPF8	-3.70514	0.0067885	0.0400992	-2.60651	0.029521	0.0463718	1
CTNNB1	-3.32368	0.00682119	0.0402127	8.7048	4.66896e-06	3.68073e-05	0
FASN	-3.77802	0.00689669	0.0404872	-9.79507	5.43865e-06	4.14782e-05	1
NTPCR	6.69529	0.00690309	0.0404872	10.8272	1.64306e-07	3.73677e-06	1
NIFK	-7.59194	0.00690848	0.0404872	-9.70896	2.00192e-06	1.99372e-05	1
SSB	-3.29015	0.00697441	0.0407136	-6.47127	0.000182954	0.000612926	1
PRKDC	-3.24755	0.00706958	0.0411886	-6.31892	0.000156475	0.000541939	1
SLC3A2	-3.62442	0.00708446	0.0411948	0.634042	0.538196	0.598022	0
ASNA1	-3.51852	0.00711525	0.0412288	-6.70031	3.35699e-05	0.000163518	1
STAT6	6.0113	0.00712305	0.0412288	5.3023	0.000629543	0.00170134	1
ITPR3	-3.44962	0.00713177	0.0412288	-3.17756	0.00995464	0.0178889	1
DNTTIP2	-8.67474	0.00727653	0.0419843	-3.38587	0.00732432	0.0137311	1
RAB31	3.84229	0.00737358	0.0424001	-1.59507	0.153744	0.198863	0
MDN1	-3.35885	0.00738423	0.0424001	-0.835113	0.420126	0.48103	0
RAP2A	3.69975	0.00739123	0.0424001	-4.45251	0.000952525	0.00238887	0
MRPS5	-3.45337	0.00741509	0.0424553	-9.31271	2.44512e-05	0.000128989	1
RPS23	-3.57245	0.00746799	0.0426763	5.12167	0.000974208	0.00243648	0
RPL32	-4.13586	0.00751363	0.0427399	0.522127	0.614944	0.669188	0
COG5	8.0899	0.00751811	0.0427399	-1.12436	0.284479	0.341586	0
MRPL44	-3.4447	0.00753437	0.0427399	-10.7843	2.4084e-06	2.2542e-05	1
LRP1	3.69035	0.00753669	0.0427399	13.223	9.80199e-08	2.54509e-06	1
FKBP10	-3.2072	0.00756156	0.0427399	-0.211202	0.836728	0.863285	0
DARS	-3.52364	0.00758255	0.0427399	-3.81518	0.00313461	0.00659081	1
MRPL1	-3.47016	0.00760474	0.0427399	-9.6928	5.70122e-06	4.29886e-05	1
ATP2C1	-3.70753	0.00760607	0.0427399	-1.13025	0.280467	0.337409	0
ALG5	-3.94184	0.0076099	0.0427399	0.436096	0.671403	0.720459	0
NUDT4	8.08386	0.00762241	0.0427399	1.31116	0.220924	0.274365	0
PLRG1	-3.69564	0.00764204	0.0427696	-7.17675	0.000113349	0.000419637	1
FTH1	3.87398	0.00766139	0.0427976	1.15751	0.273215	0.32972	0
ATG7	13.9302	0.0077099	0.0429129	-2.00701	0.0757344	0.10649	0
TMX1	-3.41277	0.00771079	0.0429129	-3.30388	0.00773074	0.0143863	1
SSFA2	-4.47608	0.0077739	0.0431493	-0.0228786	0.982139	0.985715	0
AGAP3	5.2504	0.00778221	0.0431493	-1.04225	0.318585	0.377095	0
VPS28	3.3159	0.00780364	0.0431879	2.96203	0.0120922	0.0211459	1
SRPRB	-3.38881	0.00784954	0.0433615	-2.14679	0.0531208	0.0781425	0
DTX3L	5.32137	0.00788263	0.0434597	6.50643	7.79614e-05	0.000311181	1
AP1B1	-3.21492	0.00789646	0.0434597	-13.0644	2.07439e-08	9.2852e-07	1
PLAUR	-4.1391	0.00794272	0.0436338	-4.48616	0.00309276	0.00651691	1
IARS	-3.30499	0.00810569	0.0444472	-10.3638	3.2966e-06	2.85158e-05	1
ITGB1	-3.73249	0.00815851	0.0446547	-2.08215	0.060112	0.0869201	0
EIF3K	3.16452	0.00822356	0.0449283	-1.29111	0.233785	0.288101	0
DES	3.52597	0.00828868	0.0452014	15.4424	7.22267e-08	2.11314e-06	1
RPS19	-3.38333	0.00834571	0.045355	-2.21351	0.0515495	0.0760699	0
PLD2	18.6852	0.00836396	0.045355	4.52273	0.000736981	0.00193436	1
TWF1	-3.56966	0.00836715	0.045355	-6.48271	0.000109258	0.000408263	1
CCNY	3.36469	0.00837837	0.045355	1.06519	0.312421	0.370875	0
CPQ	6.51282	0.00839288	0.045355	11.5646	3.83172e-07	6.39209e-06	1
CPNE8	3.50372	0.00847287	0.0457044	4.20517	0.00216072	0.00479629	1
MRPL22	-4.22182	0.00863576	0.046499	-18.265	8.65271e-07	1.10742e-05	1
HSPE1	-3.68956	0.00870391	0.0467815	-7.14417	1.46956e-05	8.75245e-05	1
AGPAT1	3.1956	0.0087511	0.0469433	1.77744	0.11232	0.150966	0
ADGRE5	3.69764	0.00876548	0.0469433	4.14462	0.00447525	0.00897392	1
RAC1	-3.72999	0.00881814	0.0471043	-0.803871	0.440472	0.501465	0
MAPRE1	-3.7178	0.00883485	0.0471043	-7.89486	4.58089e-06	3.6226e-05	1
UBXN6	4.23101	0.00884291	0.0471043	2.08291	0.0725739	0.102593	0
AKR7A2	4.30126	0.00894466	0.0474836	-6.84609	5.06614e-05	0.00022454	0
FARSB	-3.32749	0.00895391	0.0474836	-12.7573	4.08775e-07	6.64535e-06	1
ITFG1	3.75261	0.00896486	0.0474836	8.17379	1.39548e-05	8.42181e-05	1
BASP1	-3.28718	0.00897779	0.0474836	-5.27473	0.000987531	0.00246396	1
ITSN2	4.19411	0.00900675	0.0475524	13.6054	1.79838e-08	8.52867e-07	1
RPL22	-3.24521	0.00914421	0.0481929	4.26249	0.00298561	0.00631744	0
TRIAP1	3.90227	0.00921054	0.0484569	-8.62185	6.65282e-06	4.83755e-05	0
STOM	3.16251	0.00943277	0.0494516	14.0486	9.20559e-08	2.4342e-06	1
ATRX	-3.41482	0.00946405	0.049495	3.95321	0.00569425	0.011052	0
SMU1	-3.62615	0.00947423	0.049495	-0.409897	0.693955	0.740548	0
BZW1	-3.99468	0.00958963	0.0500103	-6.67941	2.89233e-05	0.000147059	0
SMARCA5	-3.83495	0.00961886	0.0500751	-6.10336	0.000172918	0.000586671	0
DDX47	-3.74509	0.00964289	0.0500947	0.799402	0.451927	0.512705	0
TIMP1	3.54186	0.00965621	0.0500947	6.69478	4.04718e-05	0.000188844	0
PAICS	-3.12457	0.00968445	0.0501242	-16.4168	5.37828e-08	1.75113e-06	0
COL18A1	-7.72517	0.00972346	0.05014	3.10049	0.00941267	0.0170252	0
NIPSNAP1	-3.18755	0.00973217	0.05014	-0.322828	0.754122	0.792543	0
ATAD3B	-3.72832	0.00975559	0.050174	-7.38304	1.76995e-05	0.000100273	0
PRELP	3.67422	0.00985205	0.0505829	12.5781	5.85446e-07	8.43162e-06	0
SOD2	3.15934	0.00994503	0.0509725	5.17012	0.000703299	0.00186012	0
PHF14	-4.00444	0.0102703	0.0524327	1.97828	0.0720931	0.101971	0
PSAP	-3.08498	0.0102826	0.0524327	8.82415	1.76049e-06	1.8292e-05	0
DPM1	-3.22409	0.0104805	0.0533505	-4.47986	0.000765811	0.00199629	0
RPS13	-3.49292	0.0106659	0.0542016	-0.455866	0.660158	0.710382	0
MRE11	3.21148	0.0107218	0.0543929	0.144404	0.887578	0.906521	0
CHERP	-3.22262	0.0108731	0.0550668	-2.46007	0.0342672	0.0529459	0
YES1	-3.58588	0.0109338	0.0552804	-6.31181	9.56798e-05	0.000367638	0
SEC23IP	-3.55062	0.0109638	0.0553384	-10.1751	3.74297e-06	3.12615e-05	0
RMDN3	-3.06206	0.0110737	0.055733	-1.23895	0.244623	0.299724	0
ACADS	3.51986	0.0110942	0.055733	2.49853	0.0296871	0.0465979	0
CDH13	3.13907	0.011098	0.055733	2.81747	0.0160381	0.0271779	0
RCOR1	6.15999	0.0112536	0.0563286	-6.22492	5.84755e-05	0.000249974	0
DEK	-3.28789	0.0112544	0.0563286	-4.99276	0.000333634	0.00100448	0
PUS1	-7.77527	0.0113118	0.0565211	-7.46157	5.61097e-05	0.000242318	0
PKP4	9.28738	0.0113999	0.0568518	3.78153	0.00633036	0.0121027	0
EPRS	-3.23647	0.0114269	0.0568518	-9.18111	8.94217e-07	1.12623e-05	0
ADD3	3.25136	0.0114352	0.0568518	-2.68442	0.0219527	0.0356986	0
CPNE3	-3.00867	0.011471	0.0569349	0.595576	0.562682	0.620757	0
SMC1A	-3.3703	0.0115138	0.0570526	-7.06511	2.96043e-05	0.00014932	0
STRN3	-3.76522	0.0115586	0.0570851	2.54128	0.0299272	0.0469287	0
RRP12	-4.3032	0.011587	0.0571305	-0.337086	0.745037	0.784559	0
TNS2	3.61259	0.0116618	0.0574045	8.43292	1.27228e-05	7.8287e-05	0
SERBP1	-3.02613	0.0116828	0.0574133	-7.07774	1.75241e-05	9.97665e-05	0
MTHFD2	-3.63797	0.0117872	0.0577361	-6.64049	0.000378409	0.00111408	0
COPB2	-3.43035	0.0119458	0.0584171	-8.07168	1.438e-05	8.63822e-05	0
THBS1	-3.35061	0.0121147	0.0591461	-7.28575	3.73649e-05	0.000177824	0
ILF3	-3.24342	0.0121662	0.0592691	-5.73177	0.000409803	0.00118879	0
ATP2A2	-3.10581	0.0121959	0.0592691	-5.84413	7.91725e-05	0.000315318	0
FLNC	-2.97558	0.0121995	0.0592691	-1.12015	0.300599	0.358457	0
CLIC1	-2.94385	0.0123364	0.0598367	-7.46702	0.000127441	0.000460122	0
GEMIN5	-3.31207	0.0123924	0.0600108	-11.8168	2.42952e-07	4.77781e-06	0
CAST	3.07642	0.0126514	0.0611653	-1.63652	0.129285	0.170951	0
NUP85	-3.45069	0.0127173	0.0613848	-6.08341	0.000318215	0.000962177	0
GLS	-2.93955	0.0127911	0.0616413	2.04901	0.0685479	0.0976477	0
ADA	3.17898	0.0128777	0.0618724	-2.50021	0.028513	0.0449335	0
B4GAT1	-3.32303	0.0128933	0.0618724	5.85633	0.00014023	0.000496558	0
MTA3	-4.23169	0.0129013	0.0618724	0.650853	0.531376	0.591379	0
SPAG9	3.87807	0.0129787	0.0620157	5.84341	0.000283922	0.000875872	0
MRPL24	-3.09846	0.0129975	0.0620157	-5.26093	0.000872465	0.00222381	0
QARS	-3.1262	0.0130144	0.0620157	2.31117	0.0427863	0.0645008	0
PPP1R12C	5.31501	0.0130801	0.06219	4.48423	0.00113263	0.00276063	0
LNPEP	-2.96739	0.0130926	0.06219	4.57166	0.000983132	0.00245346	0
FUCA2	3.66668	0.0131185	0.0622137	-8.82214	7.00027e-06	5.02946e-05	0
GART	-3.12977	0.0131836	0.0624233	-9.67242	1.10317e-05	7.04226e-05	0
PCCB	3.08408	0.0132359	0.0625718	-15.8293	6.24223e-09	4.38516e-07	0
TFAM	-2.9237	0.0134607	0.0635339	-6.84576	1.96211e-05	0.000108932	0
ALG11	-3.5528	0.0135665	0.0639318	-0.382347	0.713066	0.757199	0
RPL23A	-3.24456	0.0136477	0.0642132	-1.8037	0.105254	0.142698	0
TPST2	6.37635	0.0136693	0.0642132	11.8868	3.59955e-07	6.15085e-06	0
CORO1C	-3.1412	0.0138197	0.0648176	-5.29016	0.000754725	0.00197343	0
SYNE3	3.59755	0.0138838	0.0649143	5.71931	0.000215613	0.000701241	0
SEC16A	-3.11202	0.0139077	0.0649244	-2.12638	0.0638058	0.0915909	0
ARHGAP1	3.23121	0.013955	0.0650432	1.89897	0.0828999	0.115474	0
COL4A2	-2.91849	0.0139792	0.0650545	2.37958	0.0358786	0.055166	0
NXF1	-3.29408	0.0140284	0.0651818	4.55017	0.000856756	0.00219572	0
PABPC4	-3.75424	0.0141751	0.0656588	-6.75214	2.90213e-05	0.000147379	0
CD151	-2.92023	0.0142498	0.0659026	0.380521	0.711319	0.756042	0
ARFIP1	6.70714	0.0143086	0.0660719	0.93548	0.37153	0.431602	0
APEH	3.09984	0.0144059	0.0663794	-12.3576	8.45028e-08	2.32985e-06	0
ACAD8	7.65984	0.0144197	0.0663794	0.279376	0.786188	0.82004	0
FCHO2	5.10336	0.0145192	0.0667348	8.63317	1.84263e-05	0.000103464	0
MTX1	-2.87973	0.0145917	0.0669647	-6.45654	4.2182e-05	0.000194882	0
UTP3	-5.96294	0.0146511	0.0670656	-7.74509	9.16223e-06	6.12527e-05	0
YWHAG	3.06602	0.0146586	0.0670656	-6.32703	3.7943e-05	0.000179696	0
ACAP2	5.08167	0.0146949	0.0671284	2.23682	0.0591849	0.0857658	0
YTHDC1	3.48045	0.0147887	0.0674539	2.94249	0.0181173	0.0302634	0
COL6A2	3.22758	0.0148173	0.0674811	12.4354	3.75557e-08	1.38452e-06	0
HOOK3	3.28588	0.0149604	0.0679731	2.95725	0.0196033	0.032393	0
MBOAT7	-2.99577	0.014971	0.0679731	-6.80951	5.78778e-05	0.00024809	0
FBN1	3.47203	0.0150606	0.0680469	11.9285	1.12633e-06	1.32242e-05	0
CLPTM1	-4.11525	0.0150717	0.0680469	-1.69752	0.12693	0.168312	0
GLCE	-3.17149	0.0151057	0.0680469	-1.44967	0.177932	0.226399	0
GLUD1	3.01748	0.0151848	0.0680469	0.835533	0.421312	0.482213	0
LUM	3.24057	0.0151902	0.0680469	6.20714	0.00029266	0.000897789	0
NOP56	-4.44315	0.0152126	0.0680469	-11.7623	2.09238e-07	4.35884e-06	0
POSTN	3.23293	0.0152178	0.0680469	0.848464	0.41513	0.475783	0
RBM8A	-3.3838	0.0152192	0.0680469	1.03005	0.325503	0.384312	0
EIF3G	-2.90624	0.0152381	0.0680469	-0.10656	0.916917	0.931128	0
SLIRP	-3.44602	0.0154906	0.0690709	-12.9214	1.48242e-06	1.61041e-05	0
EIF4E	-2.92977	0.015575	0.0693435	-4.85678	0.000424713	0.00122446	0
SEC24B	-3.21259	0.0156245	0.0694602	-0.0989628	0.923398	0.936883	0
PROS1	3.62896	0.0157222	0.0697356	12.9894	3.49326e-08	1.33451e-06	0
NCLN	-2.82683	0.0157332	0.0697356	-12.5683	2.13754e-07	4.42767e-06	0
CD99	-2.8091	0.0157844	0.0698587	1.27884	0.227584	0.28151	0
GGH	-3.05338	0.0158399	0.0700006	-10.6221	1.11582e-05	7.10091e-05	0
COL6A3	3.26683	0.0158755	0.0700217	12.6623	3.84012e-07	6.39768e-06	0
RBMX	-3.11574	0.0158916	0.0700217	-6.99637	1.78288e-05	0.000100916	0
CAT	3.10912	0.0159369	0.0701178	2.83499	0.0230977	0.0372777	0
SFPQ	-3.22807	0.0161157	0.0706736	-7.11666	2.78232e-05	0.000142728	0
USP9X	3.36878	0.0161477	0.0706736	2.18643	0.0589461	0.0855153	0
MRPL4	-3.11307	0.016158	0.0706736	-11.6992	1.92455e-06	1.93597e-05	0
DNMBP	-4.3564	0.016184	0.0706836	-0.576748	0.58176	0.638461	0
SERPINB1	3.73303	0.0162684	0.0708998	6.55753	0.000260119	0.000815775	0
ERAP1	2.972	0.0163925	0.0711268	6.76906	3.03354e-05	0.000151977	0
CAPZA2	2.86737	0.0164027	0.0711268	-0.138453	0.892359	0.910358	0
LACTB	-2.83036	0.0164047	0.0711268	-5.33154	0.00107228	0.00263485	0
PLBD2	-3.68154	0.0165026	0.0713997	1.76484	0.103168	0.140407	0
SLC44A2	3.02178	0.0165155	0.0713997	8.57636	3.24407e-06	2.8174e-05	0
FKBP4	-2.81778	0.0165701	0.0714057	-11.2306	1.41905e-05	8.5366e-05	0
SEC61A1	-2.82377	0.0165885	0.0714057	-7.02654	0.000113613	0.000420317	0
CELF1	-3.56927	0.0165887	0.0714057	-6.52828	0.000346522	0.00103735	0
PC	3.8309	0.0166762	0.0716786	-0.835094	0.42326	0.484162	0
RDH14	-3.70862	0.0170649	0.0732442	0.0311272	0.975745	0.980313	0
LSM4	3.26644	0.017115	0.0732603	-8.91118	1.93112e-05	0.000107602	0
SLC1A5	-3.28196	0.0171178	0.0732603	-6.04194	0.000513509	0.0014363	0
SDF4	-3.11332	0.0172455	0.0737012	0.359924	0.727159	0.769578	0
NLE1	-3.70881	0.0173461	0.0740247	-6.98193	0.000300839	0.000918201	0
ALG6	3.91056	0.0173875	0.0740835	-1.52346	0.153852	0.198983	0
RPL14	-2.95932	0.0174138	0.0740835	-6.13623	0.000224976	0.000726089	0
CRTAP	-2.96188	0.0174534	0.0740835	5.28096	0.000266247	0.000831132	0
LDHA	-2.83173	0.0174592	0.0740835	-2.85316	0.0214627	0.0350007	0
EIF4G3	-7.4889	0.0175881	0.0744235	-2.47174	0.0308405	0.0482288	0
EIF2B3	3.24376	0.0176116	0.0744235	-7.06394	0.000259588	0.000814715	0
SLC25A5	-2.7633	0.0176141	0.0744235	-19.0293	1.80083e-08	8.52867e-07	0
ATAD3A	-2.89949	0.0176971	0.0745018	-11.5752	9.83081e-07	1.20456e-05	0
CTTN	-2.92941	0.0177002	0.0745018	-5.39465	0.000474986	0.00134307	0
GALNT7	-3.71649	0.0177076	0.0745018	0.733412	0.479515	0.539935	0
MTCH2	-2.86727	0.0178145	0.0746989	-15.5704	8.49397e-08	2.32985e-06	0
XXYLT1	-3.47471	0.0178245	0.0746989	-3.01468	0.0107775	0.0191433	0
CD58	2.92842	0.0178512	0.0746989	6.26415	6.08787e-05	0.000258024	0
SNU13	-3.05264	0.0178546	0.0746989	-5.79391	0.000200643	0.000661054	0
ASAH1	2.88822	0.0181507	0.0757252	6.96331	0.000159201	0.000548978	0
STOML2	-2.74137	0.0182369	0.0759517	-9.00462	4.81826e-05	0.00021636	0
PELP1	-2.97816	0.0182728	0.0759517	-6.06854	0.000286939	0.000883024	0
TXNRD1	-2.92883	0.0183098	0.0759517	-13.8095	1.47289e-08	7.59519e-07	0
LDAH	-3.23689	0.0183377	0.0759517	-5.57037	0.000138278	0.000491572	0
CBX5	-3.76403	0.0183491	0.0759517	-4.1065	0.00215977	0.00479611	0
RALB	-2.80902	0.0183822	0.0759517	-2.86515	0.0145912	0.0249737	0
MYL6	2.87203	0.0183832	0.0759517	-2.58702	0.032191	0.0501238	0
FHOD1	8.86538	0.0184128	0.0759686	-7.6901	9.28224e-06	6.17784e-05	0
BPTF	5.03775	0.018441	0.07598	7.00328	8.73409e-05	0.00034161	0
AP3B1	-2.84905	0.0188492	0.0775549	-1.29579	0.231129	0.285218	0
PFN1	-2.8199	0.019052	0.078191	-15.295	1.22121e-06	1.39567e-05	0
TSPAN9	3.675	0.0190563	0.078191	20.5843	3.58486e-09	3.33313e-07	0
PSPC1	-2.7325	0.0193975	0.0794816	-6.11451	6.89328e-05	0.000283373	0
TRIP10	3.5151	0.0194278	0.0794969	0.0601113	0.953353	0.961719	0
CD55	-2.73273	0.0195044	0.0797007	-0.931248	0.370452	0.430588	0
RPL12	-2.69215	0.0195926	0.0799034	-1.44407	0.184907	0.234066	0
AHNAK2	-2.85043	0.0196075	0.0799034	2.74424	0.0312904	0.0488658	0
DNAJA3	-2.99679	0.0196632	0.0800208	-9.62347	6.62739e-06	4.82461e-05	0
SYVN1	4.30274	0.0197096	0.0801003	3.00851	0.0151747	0.0258848	0
POR	-2.98579	0.019744	0.0801312	6.31969	4.65362e-05	0.000210914	0
OXSR1	2.89677	0.0198803	0.0805747	-3.23255	0.0127795	0.0222371	0
KCTD12	2.71604	0.0199486	0.0807417	6.08238	0.000198022	0.000653955	0
METTL7A	2.73296	0.0202405	0.081747	6.08405	5.52404e-05	0.000239792	0
HIBCH	3.65292	0.0202518	0.081747	1.80957	0.0963322	0.132046	0
ACO2	2.76948	0.0203287	0.0819275	-4.12768	0.00146095	0.00341979	0
PLXNA2	-4.04017	0.0203514	0.0819275	0.0378232	0.970968	0.97638	0
PEX14	-3.11744	0.0204291	0.0821265	-4.32498	0.00153456	0.00357423	0
REEP4	4.32793	0.0204559	0.0821265	-7.05825	8.10932e-05	0.000321449	0
ARMC1	-2.81017	0.0206008	0.0825776	-2.9292	0.0127069	0.0221229	0
NOL10	-3.24796	0.0206236	0.0825776	-6.55714	3.06274e-05	0.000153076	0
ELOC	2.73747	0.0207055	0.082794	-6.06634	0.000128317	0.000462402	0
RAB6A	-2.70947	0.0207384	0.0828146	2.47369	0.0384013	0.0586242	0
P3H1	-2.79075	0.0209467	0.0835348	-7.67263	2.55543e-05	0.000133803	0
EXOC1	3.29016	0.0210341	0.0837715	2.24517	0.0542902	0.0796495	0
PTGS1	2.68503	0.0211237	0.0840159	7.98118	2.31347e-05	0.0001238	0
YME1L1	-2.94729	0.0211905	0.0841456	-6.15444	4.95716e-05	0.000220793	0
SEC23A	-2.9668	0.0212127	0.0841456	-5.6267	0.00017354	0.000588114	0
SEC23B	-3.00718	0.0212419	0.0841495	-5.31129	0.000470506	0.00133338	0
NDUFAF2	-2.64656	0.021317	0.0842925	-6.18185	9.58028e-05	0.000367991	0
RPL29	-3.36768	0.0213345	0.0842925	-2.29198	0.0474474	0.0706681	0
REEP5	-2.92542	0.0215242	0.0849295	2.94979	0.0139301	0.023985	0
ECH1	2.63858	0.0216339	0.0852434	1.47183	0.166934	0.213955	0
GPM6A	3.5557	0.0216609	0.0852434	6.0311	6.49302e-05	0.000269991	0
CSTF3	-2.71505	0.0217461	0.0854425	-14.3959	6.2287e-09	4.38516e-07	0
FLI1	3.8339	0.0217688	0.0854425	5.99994	6.59387e-05	0.000273465	0
NDUFAF3	-2.97743	0.0218959	0.0858285	-3.73599	0.00415205	0.00840312	0
TPR	-2.81552	0.0219369	0.0858765	3.69058	0.00323522	0.00677195	0
SIN3A	-2.62942	0.0220884	0.086356	5.90723	0.000186417	0.00062049	0
RMDN2	3.61379	0.0221966	0.0866654	6.2231	5.81236e-05	0.00024889	0
CLPTM1L	-2.66381	0.0223536	0.0871075	-5.11218	0.00118603	0.00287306	0
SEC62	-2.93429	0.0223682	0.0871075	3.91018	0.00347612	0.00720583	0
SRP72	-2.61231	0.0227231	0.0883642	-11.4593	1.30381e-07	3.14535e-06	0
AHCTF1	-2.65439	0.0227622	0.0883642	-5.44408	0.000159342	0.000549312	0
IL6ST	-3.1076	0.0227798	0.0883642	5.22735	0.000265203	0.000828636	0
HSPA13	-2.84286	0.0228263	0.0884297	-2.00124	0.0790481	0.110717	0
EIF6	-2.83233	0.0228599	0.0884451	-6.93323	7.39829e-05	0.000298982	0
RETSAT	-2.82213	0.0229927	0.0887312	-1.53446	0.156352	0.201865	0
RAE1	-3.5111	0.0229973	0.0887312	-12.8619	1.12084e-07	2.80654e-06	0
RAB5A	-2.76854	0.0230685	0.0887312	1.23227	0.243923	0.29905	0
PTCD3	-2.63796	0.0230826	0.0887312	-5.12382	0.000277485	0.000860633	0
PSAT1	3.02974	0.0231355	0.0888202	-9.12123	5.58903e-06	4.23194e-05	0
RPL10A	-2.91246	0.0232578	0.0891748	0.0645404	0.950152	0.958949	0
MRPS7	-2.79421	0.0234355	0.0897106	-9.71932	2.1545e-05	0.000117328	0
MAN2B1	3.00315	0.0234577	0.0897106	3.45303	0.00486162	0.0096477	0
CYCS	-2.70634	0.0236378	0.0902134	-10.775	1.80125e-07	3.975e-06	0
RAPGEF2	4.26375	0.0236635	0.0902134	0.746985	0.477354	0.537741	0
NRAS	-2.7137	0.0237008	0.0902134	-10.7296	9.35704e-06	6.21497e-05	0
COL1A2	2.97036	0.0237101	0.0902134	14.0162	1.88861e-08	8.81237e-07	0
ACP2	-3.13474	0.0237425	0.0902215	12.1409	1.26092e-07	3.06621e-06	0
AP2A1	-2.93397	0.0241404	0.091617	-3.3746	0.0138655	0.0238934	0
ODF2	3.07575	0.0245841	0.0931821	-2.02611	0.0710704	0.100738	0
ANO6	-2.65633	0.0248071	0.0939082	-0.300884	0.768933	0.805364	0
BAZ1B	-2.81331	0.0249377	0.0942829	-13.3287	1.78173e-08	8.52867e-07	0
MAP1S	-3.26165	0.024973	0.094297	-6.51577	3.65304e-05	0.000174641	0
MATR3	-2.68406	0.025123	0.0947431	0.633997	0.540168	0.599867	0
VMP1	-2.78487	0.0253981	0.0956447	6.54586	0.000135602	0.000483555	0
C3	2.5527	0.0254467	0.0956447	11.8261	6.14799e-08	1.89613e-06	0
TOLLIP	2.66592	0.0254582	0.0956447	-1.9446	0.0868338	0.120225	0
POLDIP2	-2.54949	0.0255567	0.095894	-16.0279	2.8561e-07	5.25696e-06	0
MAP4	-2.6655	0.025749	0.096494	-0.311118	0.763061	0.800407	0
CFH	3.53505	0.0258848	0.0968811	6.87504	0.000146623	0.000515155	0
DCAF13	-9.18012	0.0260553	0.0973445	-7.1862	9.24105e-05	0.000357677	0
NUP188	-2.90552	0.0260738	0.0973445	-8.54613	1.51356e-05	8.96162e-05	0
CUTA	2.84118	0.0262322	0.0977603	-2.87224	0.0140358	0.0241572	0
MAOA	-2.72416	0.0263227	0.0977603	-2.00623	0.0691393	0.0983427	0
RNMT	2.82536	0.0263257	0.0977603	4.61133	0.00162006	0.00374031	0
AQR	-2.65748	0.0263312	0.0977603	-6.71708	3.36385e-05	0.000163725	0
RPL28	-2.75999	0.0263491	0.0977603	-1.07053	0.314944	0.373239	0
CHMP6	2.6022	0.0264442	0.0979461	-4.70235	0.000524104	0.00146072	0
DNPEP	3.00401	0.0264648	0.0979461	4.66249	0.000642036	0.00172588	0
RAB12	-2.59905	0.0265543	0.0981099	-4.6674	0.00148587	0.00347042	0
MPZL2	2.71155	0.0266048	0.0981099	9.24857	3.83332e-05	0.000181137	0
RRS1	-2.90953	0.0266077	0.0981099	-8.96604	1.29912e-06	1.45155e-05	0
DNMT1	-3.2803	0.0266668	0.0982064	-14.6897	5.10967e-08	1.70931e-06	0
WDFY1	-2.70702	0.0267306	0.0983198	-7.17728	1.38728e-05	8.37737e-05	0
GJA1	-2.55334	0.0268658	0.0986952	4.12089	0.00484109	0.00960847	0
CNDP2	-2.55539	0.0269609	0.0988073	-4.06271	0.00430336	0.00867187	0
VTI1B	-3.07207	0.0269625	0.0988073	2.02839	0.0773058	0.108439	0
NCL	-2.83844	0.0272321	0.0995576	-7.3268	1.80891e-05	0.000102023	0
STT3B	-2.57215	0.027234	0.0995576	-5.38973	0.000163169	0.000559303	0
RCC1L	3.08686	0.027268	0.0995599	-4.70955	0.00105856	0.00260875	0
RFTN1	-5.35875	0.0273195	0.0996259	-3.81633	0.00673967	0.0127752	0
FSCN1	-2.53054	0.027434	0.0999214	-7.98146	3.91654e-06	3.22846e-05	0
PTGES2	-2.57262	0.0277658	0.101007	-9.7548	2.37335e-06	2.22799e-05	0
CHD4	-2.64908	0.0281619	0.102198	-1.47554	0.181335	0.230104	0
MANSC1	4.37231	0.0282993	0.102572	3.27325	0.00716136	0.0134595	0
ZMYND8	-2.56643	0.028491	0.103142	-0.53044	0.610382	0.664911	0
CAPN2	-2.50178	0.0286274	0.10351	-7.58724	5.47876e-05	0.000238399	0
RPL11	-2.74935	0.0287944	0.103988	0.40522	0.693489	0.740202	0
ATP1B3	-2.65611	0.028837	0.104016	-7.45244	3.46939e-05	0.000168086	0
MOSPD2	3.43942	0.0289549	0.104315	4.15891	0.00321232	0.0067307	0
SMPD4	-2.65183	0.0290537	0.104544	-13.0014	3.63905e-06	3.06937e-05	0
TBL2	-2.7201	0.0292138	0.10493	-5.24533	0.00020615	0.000675503	0
MYL9	3.13378	0.0292313	0.10493	10.8727	1.78521e-07	3.9465e-06	0
PRRC2C	-2.53815	0.0294713	0.105462	-0.0217075	0.983142	0.986575	0
PRDX3	2.71606	0.0294854	0.105462	-11.6667	8.27802e-08	2.29552e-06	0
FADS3	-3.0071	0.0295723	0.105646	-0.703052	0.505507	0.565776	0
XRCC5	-2.46753	0.0296289	0.105721	-10.6758	4.80609e-06	3.75606e-05	0
ECSIT	-3.0051	0.0297478	0.106019	0.266236	0.796555	0.829212	0
CSE1L	-2.54892	0.0298414	0.106226	-16.6111	8.27764e-08	2.29552e-06	0
PBXIP1	-2.7024	0.0298861	0.106258	5.24814	0.000704767	0.00186283	0
BCAP31	-2.70028	0.0299542	0.106364	-4.85787	0.000900118	0.00228357	0
TRIP6	-2.88176	0.0300441	0.106364	-9.10977	1.00848e-06	1.22382e-05	0
MYO5A	-2.73758	0.0300542	0.106364	-5.86209	0.000182574	0.00061208	0
WDR18	-2.89258	0.0300586	0.106364	-9.51638	8.76063e-06	5.92713e-05	0
ZMPSTE24	-2.65346	0.0301448	0.106543	-2.58598	0.0253928	0.0405316	0
CCT7	-2.49414	0.0302244	0.106664	-9.78972	2.7587e-05	0.000141869	0
DDB1	-2.66273	0.0302506	0.106664	-5.63966	0.000384775	0.00112993	0
QKI	2.51736	0.030542	0.107564	1.66563	0.127973	0.169421	0
DYNC1LI1	-3.09035	0.0306704	0.107768	-13.3064	1.71895e-07	3.85392e-06	0
SPCS1	-2.9901	0.0306721	0.107768	-2.67796	0.0244307	0.039164	0
TCIRG1	-2.6526	0.0307249	0.107826	0.65871	0.526376	0.586434	0
CAVIN2	2.4973	0.0308815	0.108023	7.00476	1.71904e-05	9.82699e-05	0
TNS1	2.76784	0.0308897	0.108023	10.5522	8.42044e-07	1.09345e-05	0
TPP1	2.48643	0.0309589	0.108139	3.29139	0.00817397	0.0151001	0
SUPT6H	2.54803	0.0312966	0.109121	1.09624	0.298685	0.356544	0
CGNL1	2.58168	0.0313133	0.109121	2.70253	0.025035	0.0399972	0
CRAT	2.49108	0.0313594	0.109154	0.419533	0.683152	0.730834	0
RAP2C	-2.54724	0.0316032	0.109874	-0.461831	0.657088	0.70756	0
GALNS	3.82422	0.0317454	0.110241	-0.618531	0.548654	0.60772	0
CPSF1	-2.42923	0.0318223	0.110277	-2.53601	0.0405329	0.0614702	0
RPL19	-2.52382	0.0318454	0.110277	1.27594	0.239488	0.294298	0
PSMD11	-2.43302	0.0318668	0.110277	-20.6642	1.02649e-10	4.1871e-08	0
USP15	2.67064	0.0320178	0.110586	-0.589543	0.57553	0.632722	0
INPP5K	-2.68964	0.0320303	0.110586	10.1981	3.81147e-07	6.36672e-06	0
IL33	2.94179	0.0321721	0.110947	11.3261	1.17767e-06	1.36621e-05	0
UBE2I	-2.58511	0.032385	0.111553	-6.08523	5.46507e-05	0.000237968	0
COX6B1	2.74869	0.0325318	0.111929	-4.3561	0.00119519	0.0028875	0
GPX1	-2.42657	0.0326562	0.112227	-4.3977	0.00286621	0.00609641	0
SEC22B	-2.50019	0.0329332	0.112978	-3.99845	0.00176789	0.00403302	0
CAB39	2.61868	0.0329503	0.112978	-4.20892	0.00161212	0.00372606	0
CCPG1	-3.13309	0.0334753	0.114586	4.49103	0.000781307	0.00203117	0
ART4	2.74138	0.0335011	0.114586	6.85528	6.69664e-05	0.000276729	0
MRPS18B	-3.00718	0.0335583	0.114586	-5.429	0.000636099	0.00171393	0
ARMCX1	-2.5762	0.0335729	0.114586	1.25631	0.235989	0.290308	0
MMP1	-2.79884	0.0336353	0.114668	-5.61221	0.000942555	0.00237045	0
DCTN4	-2.46323	0.0337176	0.114776	0.564047	0.583524	0.640287	0
VDAC3	-2.48287	0.0340012	0.115313	-10.905	1.85856e-06	1.89021e-05	0
RAB7A	-2.39269	0.0340181	0.115313	-1.10077	0.29904	0.356867	0
TK2	2.81358	0.0340528	0.115313	6.70341	5.44345e-05	0.000237353	0
ABCE1	-2.87971	0.0340863	0.115313	-12.4403	3.27107e-08	1.27662e-06	0
DECR1	2.39742	0.0340953	0.115313	-1.5876	0.146243	0.190513	0
COTL1	-2.83457	0.0342448	0.115578	-4.55155	0.00337876	0.00703051	0
C19orf70	-2.70333	0.0342509	0.115578	-3.61313	0.00615105	0.0118081	0
DDI2	3.23298	0.0343753	0.115866	-1.67086	0.134486	0.177014	0
SNRPF	-2.86758	0.0345501	0.116257	-8.46075	1.54331e-05	9.07261e-05	0
NOL9	-2.5808	0.0345692	0.116257	-15.3604	2.96498e-09	2.91496e-07	0
VAC14	3.19319	0.0347726	0.116678	-5.26994	0.000584305	0.00159925	0
DBT	2.47551	0.0349243	0.117055	3.05263	0.0132753	0.0229922	0
AHSA1	-2.7538	0.0350472	0.117335	-6.99827	0.000177204	0.000598169	0
BABAM2	2.71297	0.0351264	0.117469	6.07918	0.000104924	0.000395224	0
CS	-2.49267	0.0357088	0.119246	-16.5806	3.77034e-09	3.40542e-07	0
MICU1	2.65328	0.0358372	0.119444	7.40621	8.21159e-06	5.6617e-05	0
HSPBP1	3.83527	0.0359209	0.119589	-6.03862	0.000131763	0.000472931	0
GOLPH3	2.64083	0.0363938	0.121029	2.63234	0.0284413	0.0448317	0
MRPS25	-2.4521	0.0370957	0.123117	-3.04899	0.0155092	0.0263912	0
PRPF19	-2.51014	0.0371391	0.123117	-8.73855	4.20769e-05	0.000194538	0
TFRC	-2.51813	0.0371455	0.123117	-8.36467	2.90554e-05	0.000147434	0
MTX2	-2.50623	0.0378031	0.125157	-5.58168	0.00037174	0.00109675	0
SNRNP40	-2.50154	0.0378716	0.125204	-8.68299	2.98357e-05	0.000150233	0
COL6A1	2.62877	0.0379244	0.125204	15.7138	2.66972e-09	2.72536e-07	0
TAF15	-2.49971	0.0379431	0.125204	-0.586408	0.56849	0.626018	0
MYH10	2.37412	0.0380276	0.125244	-0.0336377	0.973768	0.978722	0
STMN1	-2.4476	0.0380393	0.125244	-6.88456	0.000175778	0.000593514	0
PNPLA6	-2.41631	0.0383597	0.12616	-2.86298	0.0169945	0.0285956	0
DERL1	-2.35688	0.0384415	0.12629	-1.77542	0.102193	0.13915	0
TRABD	2.69886	0.038525	0.126425	-6.25155	4.85464e-05	0.000217376	0
CD44	2.42264	0.0388458	0.127198	0.605234	0.556797	0.615715	0
CRIP2	2.32109	0.0389059	0.127255	5.72661	0.000158352	0.000547241	0
TGM2	2.31437	0.0393416	0.128478	9.51733	7.10049e-07	9.72509e-06	0
CUL4B	-2.34798	0.0393659	0.128478	-5.17747	0.000493208	0.00138777	0
MRPS22	-2.35484	0.0394648	0.128659	-6.48379	0.000220646	0.000713755	0
AK4	2.67719	0.0397516	0.129126	1.40485	0.188684	0.238115	0
RAB5C	-2.38015	0.0398372	0.129126	-9.56834	7.70036e-07	1.02916e-05	0
SMPDL3B	2.53228	0.0398626	0.129126	3.24976	0.00863484	0.0158128	0
PPIB	-2.4231	0.0398892	0.129126	-4.39931	0.00265386	0.00571786	0
HSPA9	-2.30908	0.0399173	0.129126	-10.2542	1.19679e-06	1.37781e-05	0
CNP	-2.54638	0.0399486	0.129126	-5.05971	0.000315635	0.000956208	0
CD47	2.3126	0.0399589	0.129126	6.12061	9.92004e-05	0.000377714	0
RPL7L1	-2.93412	0.0399634	0.129126	-11.4939	9.99803e-06	6.54036e-05	0
FH	-2.30278	0.0399974	0.129126	-9.2368	2.33928e-06	2.20091e-05	0
GRB2	2.56984	0.0401564	0.129499	-2.39256	0.0483253	0.0718233	0
RABL3	-2.58772	0.0405683	0.130685	-2.58702	0.0292127	0.0459502	0
RAB11B	2.48579	0.0406118	0.130685	2.5633	0.026274	0.0417485	0
LAMB2	2.49558	0.0408429	0.131287	7.24393	1.04932e-05	6.79868e-05	0
NECAP2	3.56865	0.0408915	0.131302	-2.71804	0.0239294	0.0384629	0
SMC3	-2.45097	0.0409452	0.131333	-5.96975	0.00046418	0.00131752	0
KPNA1	-2.76763	0.0410979	0.131651	-4.72709	0.000562181	0.00154741	0
TIMM50	-2.56228	0.0411843	0.131651	-7.94487	0.000117904	0.000432897	0
CNBP	-2.59085	0.0412532	0.131651	-1.44172	0.184888	0.234066	0
MMAB	2.74552	0.0412651	0.131651	-2.53289	0.0272904	0.0431791	0
HEXB	-2.28072	0.0416954	0.132823	2.51638	0.0302897	0.0474437	0
GPR180	-2.552	0.0417214	0.132823	-5.48013	0.000140974	0.000498633	0
GNA14	3.25202	0.0419846	0.133518	6.71832	3.19416e-05	0.000157355	0
SPTAN1	2.45471	0.0421688	0.133961	10.096	2.85379e-05	0.000145397	0
NDUFS6	2.53237	0.0422773	0.134163	-9.24982	8.28466e-07	1.08346e-05	0
PCBP1	-2.26788	0.0428309	0.135671	-0.999027	0.338737	0.398226	0
DNM2	2.3231	0.0428436	0.135671	-3.1076	0.0137553	0.0237261	0
STX12	-2.27528	0.042891	0.135678	-3.39866	0.00845087	0.0155457	0
SF3B3	-2.40366	0.0430484	0.136023	-6.61554	0.000260558	0.000816746	0
KRT8	2.35682	0.0431337	0.136023	4.05236	0.00358725	0.0074039	0
DLAT	-2.26127	0.0431371	0.136023	-17.9604	4.68555e-09	3.84732e-07	0
CLINT1	-2.28292	0.0434669	0.136786	-4.59933	0.00178246	0.00406332	0
TOM1	2.44672	0.0434708	0.136786	2.28074	0.0416563	0.06297	0
SLC25A24	-2.27812	0.0435241	0.13681	-5.30095	0.000680443	0.00180953	0
NUP107	-2.79022	0.0436887	0.136966	-10.03	4.71952e-06	3.70904e-05	0
CDC42BPA	2.69984	0.043706	0.136966	1.36414	0.200973	0.252213	0
G3BP1	-2.28608	0.0437116	0.136966	-7.4304	7.95358e-06	5.52903e-05	0
CAPN5	3.36151	0.0438954	0.137398	1.52542	0.166171	0.213107	0
HNRNPAB	-2.29684	0.0442073	0.138084	-10.0693	9.40352e-06	6.22878e-05	0
RBM17	-2.34193	0.0442765	0.138156	-6.33076	0.000254366	0.000800879	0
KRT18	-2.29246	0.0444171	0.138449	-6.73939	0.000160156	0.000551116	0
NEDD4L	2.61205	0.0446019	0.138824	3.86766	0.00401471	0.00815779	0
CHCHD3	-2.29891	0.0446303	0.138824	-10.1325	4.3362e-06	3.47807e-05	0
EXOC5	-2.32037	0.0446789	0.13883	-6.32574	0.000120358	0.000439413	0
NME3	2.29769	0.045104	0.139993	6.65547	3.13421e-05	0.000155307	0
SARS	-2.36461	0.045163	0.139993	-4.25267	0.0020157	0.00452405	0
FAM136A	2.62841	0.0451939	0.139993	-13.2954	2.92066e-07	5.32543e-06	0
GIT1	2.42373	0.0453684	0.140325	-2.12092	0.0645634	0.0925524	0
HYOU1	-2.2417	0.0454356	0.140325	-4.2386	0.00187308	0.00423705	0
P3H4	-3.59912	0.0454421	0.140325	-4.70335	0.00056795	0.00156125	0
EMD	-2.31779	0.0457982	0.141262	-5.0212	0.000837321	0.00215318	0
AIMP2	-2.54727	0.0458602	0.141262	-5.79244	0.000751147	0.00196506	0
DCAF7	2.61325	0.0458876	0.141262	-3.26242	0.014049	0.0241766	0
HEG1	6.90929	0.0465629	0.142813	6.91432	1.68199e-05	9.65306e-05	0
ALDOA	-2.22335	0.046569	0.142813	1.00038	0.352301	0.41199	0
USO1	-2.27644	0.0465698	0.142813	-0.0293314	0.977112	0.981381	0
FTL	2.50579	0.0465831	0.142813	-0.275945	0.790186	0.823327	0
RPL9	-2.21194	0.0471435	0.144383	1.34893	0.212806	0.265535	0
RPS21	-2.21009	0.0473086	0.14474	0.389474	0.70792	0.752936	0
GORASP1	-2.46382	0.0474383	0.144988	4.95628	0.00054574	0.00151062	0
ACSF3	3.24293	0.0476051	0.145349	-1.05946	0.314038	0.372341	0
RNPS1	-2.3585	0.0477819	0.14574	-8.24313	2.98009e-05	0.000150133	0
AHCY	-2.28713	0.0479967	0.146216	-10.6729	1.75173e-06	1.8231e-05	0
ADGRG6	2.53021	0.0480362	0.146216	7.14379	1.18648e-05	7.41556e-05	0
S100A11	-2.23753	0.0480968	0.146251	-3.11352	0.0125267	0.0218362	0
MGST1	-2.47295	0.0482542	0.146501	-6.92474	0.000123377	0.000447918	0
VDAC1	-2.21429	0.0482771	0.146501	-16.1697	4.59464e-08	1.58741e-06	0
WASHC5	3.11805	0.0484092	0.14668	-12.2155	4.93647e-08	1.6735e-06	0
CALHM2	3.28511	0.0484346	0.14668	8.4971	8.2064e-06	5.66121e-05	0
PLPBP	2.55535	0.0485031	0.146739	-1.93774	0.077242	0.108393	0
RPL10	-2.20481	0.0485678	0.146786	4.16504	0.00249315	0.00542333	0
PSMB4	2.23007	0.04864	0.146824	-5.69119	0.000715095	0.00188708	0
ACTN1	2.27009	0.0486788	0.146824	5.44634	0.000507963	0.00142327	0
GPATCH8	-2.5915	0.0487743	0.146963	2.87386	0.0234487	0.0377939	0
CD14	2.5082	0.0493763	0.148328	8.39014	4.38873e-06	3.51015e-05	0
EPB41L1	4.02714	0.0494774	0.148482	5.9426	0.0001188	0.00043505	0
FDXR	-2.45247	0.0496239	0.148772	-6.97097	1.4971e-05	8.88355e-05	0
DOCK6	-2.59496	0.0497309	0.148943	0.175142	0.864051	0.887204	0
ARVCF	-2.42479	0.0498613	0.149065	-0.417379	0.684857	0.732377	0
GSN	2.20319	0.0499471	0.149065	5.23632	0.000212827	0.000693477	0
DDX20	-2.72645	0.0499515	0.149065	-9.73709	3.979e-05	0.000186281	0
ZZEF1	3.49247	0.0499714	0.149065	0.206942	0.84227	0.867941	0
PSMF1	3.13182	0.050185	0.149552	0.145145	0.888749	0.907357	0
ARRB1	2.67997	0.0503913	0.150017	2.89066	0.0163697	0.027673	0
WDR47	6.16238	0.0507017	0.150791	-1.8967	0.0950653	0.130436	0
MRPL19	-2.2578	0.0509958	0.151403	-5.60736	0.000266377	0.000831278	0
VAMP5	-2.42569	0.051062	0.15141	-3.75616	0.00655605	0.0124814	0
TGFBI	2.34665	0.0511574	0.151542	1.89466	0.0851802	0.11822	0
DPYSL3	2.17459	0.0513949	0.152094	2.56328	0.0318246	0.0496144	0
RPL34	-2.29686	0.0516727	0.152765	1.77019	0.11984	0.159884	0
GMPS	-2.982	0.0518003	0.152991	-5.3982	0.000173753	0.000588407	0
SNRNP200	-2.21743	0.0521394	0.153839	-3.46294	0.00705165	0.0132809	0
GNAI3	-2.21699	0.0522722	0.154079	-2.82159	0.0206634	0.0338939	0
NDUFB8	2.52318	0.0524325	0.154399	-4.17105	0.00208672	0.00466523	0
EDC4	-2.26398	0.0526351	0.154843	-8.32583	9.69495e-06	6.37176e-05	0
RPS2	-2.16222	0.0526929	0.15486	-7.56526	1.04992e-05	6.79868e-05	0
NDUFB3	-2.69615	0.0536103	0.157313	-8.72436	1.59622e-05	9.30149e-05	0
PPIL1	-2.40374	0.0536331	0.157313	-9.63368	8.16551e-07	1.0722e-05	0
CUL3	-2.28108	0.0537392	0.15747	-6.49312	5.64041e-05	0.00024334	0
SRI	2.14574	0.0539025	0.157793	-5.56486	0.000397639	0.00116016	0
JAGN1	-2.38806	0.0539898	0.157894	-3.06447	0.0172187	0.0289343	0
SCARF1	-2.89653	0.0544556	0.1591	-0.907281	0.383566	0.443872	0
CKAP5	-2.18193	0.054703	0.15951	-18.3358	3.72948e-08	1.37893e-06	0
GLG1	-2.15807	0.0551004	0.160512	6.95995	0.000218228	0.000707927	0
PSMB8	3.10079	0.0553499	0.161082	3.5632	0.00502121	0.00992391	0
UBTF	2.29455	0.0554366	0.161177	4.19798	0.00123888	0.0029747	0
DDX6	-2.14012	0.0555968	0.161385	0.506158	0.625469	0.678714	0
ALG2	-2.15256	0.055633	0.161385	-3.71785	0.00414641	0.00839304	0
PLD1	-2.13082	0.0556706	0.161385	1.53448	0.15217	0.19713	0
MRPL11	-2.29879	0.055742	0.161435	-5.00756	0.00189524	0.00428028	0
TMX3	-2.31531	0.0558952	0.161722	-1.1472	0.274802	0.331319	0
CRIM1	-2.2568	0.0560978	0.162151	5.81175	9.62476e-05	0.000369139	0
NAPG	-2.22937	0.0563523	0.162729	0.255197	0.804874	0.836015	0
UBE2G2	-2.39521	0.0564594	0.162816	-4.8244	0.000860077	0.00220155	0
PDAP1	2.45716	0.0565571	0.162816	-9.41286	1.75759e-06	1.82769e-05	0
PSMD13	-2.17102	0.0565633	0.162816	-10.4075	6.99466e-06	5.02828e-05	0
RBMS2	-2.89467	0.0566008	0.162816	7.34893	1.57172e-05	9.1926e-05	0
ATP13A1	-2.12895	0.0567012	0.162911	-2.99743	0.0144938	0.0248373	0
CPNE1	-2.28843	0.0567431	0.162911	-2.23337	0.0457236	0.0683769	0
ADAR	-2.20735	0.0571905	0.164038	2.67815	0.0277452	0.0438328	0
PSMD8	-2.15899	0.0575804	0.164998	-9.30716	4.28906e-06	3.45007e-05	0
ZC3HAV1	-2.21719	0.0578038	0.165292	-0.47088	0.650402	0.701495	0
AP3D1	-2.10564	0.0578329	0.165292	-8.26323	2.7367e-05	0.00014096	0
NID1	2.15171	0.0578493	0.165292	6.24745	9.28089e-05	0.000358999	0
PTGFRN	-2.24429	0.0581659	0.165878	4.27111	0.00150481	0.00351205	0
RAB18	-2.12525	0.0582509	0.165962	-1.01553	0.332211	0.391282	0
TMTC3	-2.17373	0.058356	0.166103	-2.71324	0.0198581	0.03275	0
PHGDH	-2.29995	0.0586358	0.166592	-7.33398	1.24277e-05	7.68449e-05	0
FUT11	2.1917	0.0586395	0.166592	6.24743	4.32724e-05	0.000199063	0
TMEM70	-2.45696	0.0589712	0.167375	-2.53975	0.037136	0.0568161	0
ADNP	-2.37383	0.0591707	0.167782	1.0131	0.332104	0.391193	0
DDX42	-2.31235	0.0596866	0.169084	-2.229	0.0546277	0.0801075	0
ATP6V1A	-2.21437	0.0601709	0.169713	-2.78097	0.016985	0.0285833	0
TLN2	2.19439	0.0601725	0.169713	11.0187	2.45828e-07	4.80448e-06	0
SCAMP1	-2.12963	0.0601931	0.169713	2.54586	0.0316625	0.0493982	0
EXOC4	2.45334	0.0611668	0.171981	4.90399	0.000680451	0.00180953	0
SWAP70	-2.2118	0.0611706	0.171981	-3.02619	0.0105409	0.0187653	0
PPP3CA	2.19626	0.0612657	0.172002	1.59644	0.137899	0.180923	0
P2RX4	-2.33951	0.0613388	0.172002	-1.91757	0.0892682	0.123231	0
DNAJC11	-2.14705	0.0614087	0.172002	-7.1898	0.000143544	0.00050645	0
RPL15	-2.1789	0.0616663	0.172562	5.23181	0.000654797	0.00175273	0
PGRMC2	2.07123	0.0620358	0.173433	2.99385	0.0120068	0.0210111	0
SLC12A7	-2.13097	0.0622903	0.173981	1.45037	0.173644	0.221589	0
PRPF40A	-2.34072	0.0626509	0.174661	-10.7105	1.1224e-06	1.32026e-05	0
SNX2	2.48142	0.0627288	0.174715	0.432726	0.673122	0.722182	0
CTSB	-2.18662	0.0627938	0.174733	-1.28999	0.224404	0.278125	0
IPO5	-2.12434	0.0628932	0.174753	-5.91231	0.000154411	0.000536852	0
CORO1B	-2.35949	0.062918	0.174753	-6.24116	4.67607e-05	0.000211628	0
ME2	-2.0881	0.0635568	0.176352	-15.4135	5.17662e-09	4.15694e-07	0
DUT	2.17649	0.0636205	0.176352	-3.90911	0.00215552	0.00478857	0
DPYSL2	2.19965	0.0636713	0.176352	-0.0183386	0.985835	0.988415	0
YARS	-2.10308	0.0638753	0.176753	-7.40828	0.000221448	0.000715799	0
KHDRBS1	2.1216	0.0639444	0.176768	-2.85096	0.0190383	0.0316139	0
MYEF2	-2.33774	0.0639991	0.176768	1.62529	0.132046	0.174183	0
TOMM20	-3.25973	0.0645513	0.177879	0.868159	0.407448	0.467827	0
DDX39B	-2.03805	0.0645815	0.177879	-2.70787	0.0323233	0.050305	0
LAMA4	-2.11549	0.0645827	0.177879	-0.351898	0.732576	0.773822	0
CAV2	-2.36583	0.06464	0.177879	-0.702605	0.498172	0.558555	0
EIF2S2	-2.04902	0.0650896	0.178789	-11.0554	1.07386e-05	6.8999e-05	0
RSU1	2.03176	0.0650904	0.178789	-1.77829	0.116058	0.155428	0
F13A1	2.02968	0.0651655	0.178789	5.15071	0.00047095	0.00133404	0
SACM1L	-2.03027	0.0652102	0.178789	2.06157	0.063332	0.0910244	0
GCN1	-2.09261	0.0653466	0.178998	-7.47694	5.98427e-05	0.000254271	0
PDCD4	2.14983	0.0655015	0.179258	10.1305	7.20709e-06	5.14229e-05	0
EIF3D	-2.09393	0.0656031	0.179258	-4.46987	0.00155962	0.00362526	0
KDELC1	-2.39259	0.0657172	0.179258	0.976202	0.349925	0.409552	0
FSTL1	-2.10976	0.0658033	0.179258	5.40642	0.000801628	0.00207554	0
SUPT16H	-2.10013	0.0658171	0.179258	-16.2212	1.70333e-09	2.15386e-07	0
BCAM	2.14643	0.0658417	0.179258	12.9536	2.56712e-08	1.0678e-06	0
HECTD1	-2.37324	0.0658621	0.179258	1.6977	0.119206	0.159088	0
TUBGCP2	2.24648	0.0661416	0.179855	-4.50832	0.00130241	0.00310267	0
ARL8B	-2.19092	0.0665751	0.180869	-2.92018	0.0136628	0.0235795	0
FAM162A	-2.26031	0.0670069	0.181713	-2.3592	0.037107	0.0567786	0
KPNA4	-2.08881	0.0670078	0.181713	-11.1013	1.1468e-07	2.86021e-06	0
QDPR	2.3002	0.0670898	0.18177	-4.61213	0.00119441	0.00288618	0
MYOF	-2.01252	0.0675305	0.182632	-2.01753	0.0697663	0.0990563	0
MGAT1	-2.32194	0.0678398	0.183303	5.7321	0.000200244	0.000659914	0
COPG2	9.08956	0.0681291	0.183918	2.25327	0.0446718	0.0670395	0
TMEM120A	2.4919	0.0683726	0.184242	10.5889	2.1759e-07	4.48115e-06	0
PCBP2	-2.00668	0.0685846	0.184646	1.96508	0.0744969	0.105018	0
ERG	2.33495	0.068905	0.185342	2.6572	0.0250049	0.039968	0
RP2	-1.99658	0.0691394	0.185804	-2.68031	0.0271757	0.0430299	0
FBLN1	2.0356	0.0693476	0.186196	5.36978	0.000999586	0.00248521	0
ARFGAP1	-2.82593	0.0695358	0.186534	-3.71487	0.00295454	0.00626113	0
CTSA	-2.19682	0.0698318	0.187159	-2.53391	0.0285615	0.0449932	0
UBAC1	2.39897	0.0705479	0.188777	-3.90594	0.00407413	0.00826791	0
ACAA1	-2.05215	0.070562	0.188777	-0.921556	0.379297	0.439495	0
HSPA5	-2.03902	0.0706426	0.188823	-2.47873	0.0315162	0.0492063	0
AKAP2	-2.00022	0.0708424	0.189083	5.68017	0.000117842	0.000432897	0
AGK	-2.06433	0.0708664	0.189083	-5.37381	0.000746155	0.00195425	0
TAGLN2	2.11226	0.0713163	0.189779	-1.09572	0.313548	0.371968	0
PFDN6	2.13495	0.071368	0.189779	-5.24597	0.000866853	0.00221352	0
ATXN10	4.86859	0.0713818	0.189779	-0.550385	0.592312	0.648017	0
PFKM	-2.02905	0.0715222	0.189851	-3.53084	0.00522862	0.0102696	0
INTS3	2.35175	0.0715625	0.189851	2.2153	0.0506937	0.0749469	0
EIF5	-2.02586	0.0715998	0.189851	-7.72775	7.36322e-05	0.00029785	0
DAP3	-2.07434	0.0717502	0.190081	-5.40808	0.000989458	0.00246626	0
HMCN1	3.07063	0.0718659	0.190218	9.55812	7.17548e-07	9.76684e-06	0
RCC1	-4.22909	0.0720697	0.190443	-10.7239	1.47647e-05	8.78174e-05	0
VAMP7	-2.01368	0.0720786	0.190443	-0.282242	0.782674	0.817251	0
ACOX1	-2.02626	0.0721758	0.190531	-1.78987	0.108813	0.146814	0
DNAJA1	-2.00015	0.0725642	0.191373	-2.42233	0.0407201	0.0617246	0
DLD	1.97759	0.0726229	0.191373	-6.05091	5.77209e-05	0.000247585	0
SLC27A4	-2.21782	0.0727372	0.191505	-5.74599	0.00108423	0.00265906	0
POLR2I	2.31269	0.0730014	0.191844	-6.09321	6.43959e-05	0.000268475	0
GATD1	2.35657	0.0731353	0.191844	-6.66994	0.000246409	0.000781628	0
LETM1	-2.04288	0.0731833	0.191844	-7.42283	0.000149065	0.000521853	0
LGALS3BP	2.08635	0.0732115	0.191844	8.75522	9.52096e-06	6.28682e-05	0
PFAS	-2.1072	0.0732161	0.191844	-9.05245	3.93444e-05	0.000184811	0
STAT3	2.00455	0.0732518	0.191844	10.7942	2.38219e-07	4.7402e-06	0
CNOT1	-2.00502	0.0733235	0.191857	-4.40306	0.00178481	0.00406739	0
SLK	2.17524	0.0733855	0.191857	1.53055	0.154423	0.199619	0
VAPA	-2.02042	0.0736427	0.192361	1.3907	0.192525	0.242478	0
RMND5A	2.75683	0.0737949	0.19259	1.79564	0.119837	0.159884	0
RCN3	-1.95648	0.0743944	0.193985	-5.24058	0.000251043	0.000792619	0
NPLOC4	-1.9634	0.0745068	0.193999	-0.479871	0.646155	0.69751	0
COLEC12	2.11456	0.0745619	0.193999	4.725	0.000821385	0.00211924	0
ITPR1	2.02905	0.0745975	0.193999	23.5158	2.37515e-11	1.76669e-08	0
ITGA6	-2.12482	0.0746599	0.193999	-9.90934	1.56534e-06	1.67177e-05	0
VCL	2.03519	0.074796	0.194183	-1.23647	0.245561	0.300564	0
SART1	-2.03466	0.0754327	0.195496	-3.21895	0.00738553	0.0138356	0
PTPN12	2.62633	0.07574	0.196122	2.09934	0.0576575	0.0840147	0
PRPF6	-2.08884	0.0760178	0.196671	6.59988	3.53598e-05	0.000170593	0
BCKDHB	2.03738	0.0769873	0.199006	-0.333907	0.745371	0.784715	0
MACROD1	4.26309	0.0771165	0.199025	-5.95153	0.000135017	0.000481605	0
MRPS35	-2.09239	0.077128	0.199025	-6.0021	0.000168885	0.000575727	0
HNRNPUL2	1.95033	0.0772037	0.199048	-0.445737	0.667079	0.716445	0
LTBP2	2.24824	0.0773975	0.19926	6.30613	4.79025e-05	0.000215408	0
NDUFAF1	-2.08477	0.0774889	0.19926	-5.8455	0.000219963	0.000712092	0
VDAC2	-2.04264	0.0775316	0.19926	-5.98101	0.000205311	0.000673628	0
TLN1	1.9338	0.077553	0.19926	0.309641	0.764135	0.801268	0
SELENOF	1.93224	0.0776279	0.199281	2.05914	0.0636152	0.091338	0
SPARC	-2.14866	0.0777185	0.199342	7.38426	7.06441e-05	0.00028816	0
PHB	-1.94017	0.0781207	0.200201	-7.41625	0.000159907	0.00055081	0
TMEM192	2.22031	0.078337	0.200482	-1.9036	0.0812746	0.11356	0
LAMA5	1.95207	0.0783648	0.200482	-1.35235	0.216909	0.270001	0
CAMK2G	2.0891	0.0793007	0.202434	-1.11131	0.293653	0.351267	0
SULT1E1	2.33178	0.0793035	0.202434	1.90973	0.0877873	0.121452	0
PSMD1	-1.92795	0.0793314	0.202434	-11.9005	9.17458e-06	6.12527e-05	0
SNX27	2.93474	0.079626	0.202977	4.80781	0.000811907	0.00210036	0
SYNPO	1.95043	0.0797312	0.202977	6.4203	4.51787e-05	0.000206017	0
TOMM22	-2.03421	0.0797481	0.202977	-7.56641	0.000113871	0.000420913	0
KRR1	-2.08157	0.0801156	0.203428	-2.10128	0.0668732	0.0955062	0
PRRC1	-1.98907	0.0801301	0.203428	0.489902	0.635047	0.687279	0
PSMD14	-1.98194	0.0803156	0.203726	-12.6054	3.25437e-06	2.82246e-05	0
NEU1	-2.32492	0.0807001	0.204527	-1.15709	0.276057	0.33261	0
SOD1	2.28958	0.080943	0.204969	-2.80611	0.0223912	0.0363089	0
TIMM10B	-2.06506	0.0810717	0.20512	-3.54333	0.00905721	0.0164623	0
LGMN	6.44624	0.0815771	0.20601	0.493625	0.632915	0.685233	0
F11R	-1.91554	0.0816306	0.20601	7.6929	6.56077e-06	4.79144e-05	0
LSM8	2.20896	0.0820311	0.206846	-2.35807	0.0450339	0.0675108	0
ANP32E	1.98549	0.0823864	0.207468	-3.44072	0.00777925	0.0144596	0
TMEM41A	2.02827	0.0824168	0.207468	-4.87394	0.000588568	0.00160918	0
NDUFS7	-1.95465	0.0825639	0.207594	-5.47688	0.000229262	0.000735934	0
AASDHPPT	3.14919	0.0826061	0.207594	-2.90609	0.0134804	0.0233027	0
BRK1	1.94154	0.0827619	0.20781	0.142144	0.890851	0.909112	0
MINPP1	-2.02852	0.0829403	0.208083	2.80965	0.0215432	0.0351049	0
STT3A	-1.93516	0.0831865	0.208525	-9.10771	2.83873e-05	0.000144799	0
HNRNPR	-1.93038	0.0836007	0.209388	-6.33343	0.000158868	0.000548015	0
MRPL38	-1.92176	0.0839073	0.209691	-2.4283	0.0403944	0.061297	0
NSA2	-2.44672	0.0839117	0.209691	-7.639	3.39386e-05	0.000164996	0
GCC2	-2.60706	0.0839325	0.209691	4.86886	0.000762582	0.00199068	0
STAU1	-2.08785	0.0841109	0.209961	-0.862718	0.406551	0.466882	0
FNDC3A	-1.89793	0.0842476	0.210126	5.19259	0.000288623	0.000887344	0
ARMC10	2.12986	0.0843326	0.210162	-3.15297	0.0110636	0.0195772	0
SH3GLB1	-1.89539	0.0846076	0.210672	2.21432	0.050307	0.0744363	0
IMP3	-3.49107	0.0847974	0.210968	-2.61662	0.0262585	0.0417344	0
NDUFV2	1.89113	0.0850168	0.211338	0.525902	0.608803	0.663419	0
LRRFIP2	-2.09123	0.0851875	0.211586	-14.8811	1.68562e-08	8.29366e-07	0
HINT1	2.34758	0.0857063	0.212639	-5.89909	0.000526691	0.00146503	0
OCIAD1	-1.92936	0.0857542	0.212639	3.26974	0.0141065	0.0242689	0
XPO7	2.90363	0.0858915	0.212748	0.145917	0.888147	0.906865	0
PA2G4	-1.89905	0.0860894	0.212748	-14.916	5.08084e-07	7.72202e-06	0
MRPL50	-1.88676	0.086119	0.212748	-3.6287	0.00669713	0.0127117	0
ETFA	1.88247	0.0861606	0.212748	-7.52234	0.000127576	0.000460388	0
PPP6C	2.00232	0.0862201	0.212748	-0.851047	0.413785	0.474414	0
HSPD1	-1.92612	0.0862262	0.212748	-9.69468	7.94939e-07	1.05314e-05	0
CLEC3B	1.89177	0.0863707	0.212929	12.1094	3.99365e-06	3.27283e-05	0
STAT5B	2.78646	0.0864728	0.213004	7.65609	5.50217e-05	0.00023921	0
EXOC8	2.43067	0.0866883	0.213359	-0.261984	0.799966	0.832113	0
XRN1	2.45608	0.086922	0.213758	6.64601	0.000122077	0.000444346	0
DGKA	2.14849	0.0873797	0.214369	1.82204	0.103794	0.141066	0
DHCR24	-3.05851	0.0874554	0.214369	-16.8309	2.81372e-07	5.20929e-06	0
FBXO7	3.07518	0.0874559	0.214369	0.886051	0.408639	0.468981	0
UNC93B1	2.36276	0.0874579	0.214369	7.09792	1.45743e-05	8.70947e-05	0
AP2B1	-1.98714	0.0880207	0.215394	0.205206	0.84173	0.867526	0
FAM98B	-1.9365	0.0883593	0.215869	-0.722158	0.484034	0.5442	0
TPM3	1.88373	0.0884963	0.216026	-6.16607	0.000377745	0.00111265	0
CD163	2.1139	0.0886073	0.216026	2.67936	0.0212517	0.0347283	0
SLC9A3R2	1.99796	0.0887088	0.216026	3.43289	0.00564524	0.0109687	0
COPE	-1.86563	0.0887666	0.216026	-3.36215	0.00572377	0.0110991	0
NDUFA6	-1.93035	0.0887856	0.216026	-6.77705	2.43364e-05	0.000128598	0
DHRS11	2.26256	0.0892809	0.217054	-3.77729	0.00338748	0.00704518	0
CSDE1	-1.89633	0.08962	0.217701	3.16709	0.0129157	0.0224401	0
HDAC2	-1.88456	0.0900826	0.218646	-11.879	9.02846e-08	2.41875e-06	0
ASS1	1.91833	0.0905621	0.219631	10.2696	2.43206e-05	0.000128568	0
BST2	2.10528	0.0906835	0.219747	5.30428	0.000511161	0.00143096	0
SEC24C	-1.92935	0.0907836	0.219805	-6.1867	0.000133929	0.000478557	0
SSRP1	-1.9875	0.0908547	0.219805	-12.8878	3.16631e-06	2.77464e-05	0
HAGH	1.96255	0.0911626	0.220287	0.339949	0.743668	0.783249	0
POLR2D	3.88323	0.0912014	0.220287	-11.7786	6.18593e-08	1.90319e-06	0
TCERG1	1.96208	0.0914324	0.220666	-8.347	6.11166e-05	0.000258814	0
NLRX1	2.12378	0.0918355	0.221452	6.11893	6.84551e-05	0.000281776	0
OGDH	1.83717	0.0919158	0.221452	0.902589	0.391385	0.451722	0
AIP	2.27513	0.0919874	0.221452	2.87075	0.0188399	0.0313214	0
EZR	-1.83099	0.0920724	0.221452	-3.68667	0.0052796	0.0103569	0
BSG	-1.83931	0.0921295	0.221452	-0.362329	0.728692	0.770808	0
GNA11	-1.88619	0.092518	0.222207	-6.59566	0.000170848	0.000581058	0
GOLGA5	-2.08612	0.0934731	0.22432	0.415604	0.685039	0.732419	0
BPGM	2.10081	0.0936072	0.224462	0.950506	0.374	0.433993	0
SCCPDH	-1.81917	0.0939325	0.224915	-4.32856	0.00374223	0.00768564	0
RAB29	3.26241	0.0939471	0.224915	3.47528	0.00550449	0.0107397	0
RBBP5	-2.21025	0.0940513	0.224984	-3.97318	0.00191905	0.00432942	0
CHID1	2.03603	0.0943076	0.225416	-1.08781	0.298842	0.356698	0
MARS	-1.81607	0.0945159	0.225733	-5.48795	0.00124622	0.00298852	0
PCYOX1	1.83015	0.0949679	0.226632	3.48595	0.007019	0.0132234	0
PYGB	-1.85135	0.0950748	0.226705	-6.57115	0.000120017	0.00043837	0
MCM3AP	2.51362	0.0956349	0.227859	-4.77053	0.00048443	0.00136641	0
FKBP5	2.50628	0.0957193	0.227878	-0.616512	0.558317	0.61705	0
LBR	-1.82204	0.096131	0.228535	-8.13119	2.12455e-05	0.000116246	0
SKP1	1.94197	0.0962037	0.228535	-0.538785	0.605454	0.660339	0
LRRC8A	-1.84162	0.0962252	0.228535	-5.01364	0.000990233	0.0024668	0
RAB3D	1.89697	0.0967625	0.229623	1.13638	0.278005	0.33467	0
H6PD	1.85859	0.0968372	0.229623	10.1119	3.5748e-07	6.13977e-06	0
MRPL58	-2.15869	0.0982233	0.232725	-10.0455	1.73341e-05	9.90016e-05	0
BAIAP2	1.90883	0.0983302	0.232793	4.46694	0.00256208	0.00555417	0
GBF1	-1.90996	0.0990044	0.234203	-2.80641	0.0230067	0.0371403	0
PSMA5	1.8688	0.0992325	0.234504	-7.51087	0.000157098	0.000543653	0
TCP1	-1.81796	0.0992887	0.234504	-8.51949	2.21568e-05	0.000119681	0
TOMM40	-1.84484	0.0996182	0.235096	-23.5889	2.03941e-11	1.61177e-08	0
CPOX	1.78799	0.0997131	0.235134	0.4951	0.631531	0.684059	0
TRIM56	2.21104	0.100461	0.236435	4.35068	0.00132349	0.00314172	0
PIGU	-1.81866	0.100555	0.236435	-5.39634	0.000364497	0.00107907	0
CACNA2D1	1.81903	0.100588	0.236435	-1.20602	0.254479	0.310188	0
DPP7	1.83086	0.100598	0.236435	-1.45826	0.173981	0.221975	0
ADK	2.71498	0.100661	0.236435	-15.4362	4.62509e-09	3.8225e-07	0
DDX50	-4.03389	0.101499	0.238215	2.21362	0.0494149	0.0732792	0
NDUFA9	-1.7755	0.102269	0.239645	-11.3983	1.94549e-07	4.15553e-06	0
PARP1	-1.80448	0.102971	0.241101	-19.7298	5.96811e-10	1.2172e-07	0
CCDC58	-2.01312	0.103061	0.241122	-15.0124	1.95221e-08	8.98526e-07	0
UGGT2	1.88739	0.103862	0.242807	3.79933	0.00391183	0.0079731	0
SHANK3	1.87356	0.10395	0.242821	2.14019	0.0651535	0.0932998	0
FAM177A1	-1.98379	0.104114	0.243014	2.01139	0.0726823	0.102724	0
RAB34	-1.79396	0.104578	0.243716	-4.37739	0.00132114	0.00313782	0
TMLHE	2.97843	0.105714	0.245921	1.09298	0.29598	0.353649	0
ERGIC1	-1.78938	0.105865	0.245946	-6.11544	0.000296803	0.000908516	0
AFG3L2	-1.7518	0.105976	0.246012	-5.92739	0.000171792	0.000583329	0
UACA	5.26904	0.106075	0.246052	-1.56357	0.146732	0.191025	0
VAMP8	-1.82038	0.10616	0.246058	0.441222	0.667266	0.716567	0
SYPL1	-1.80019	0.107159	0.248181	0.283424	0.781753	0.816425	0
U2AF2	1.78053	0.107317	0.248304	-12.8284	3.27961e-07	5.81098e-06	0
YWHAB	1.79574	0.107854	0.249209	-3.73159	0.00287075	0.00610299	0
G3BP2	-1.75173	0.108002	0.249357	-3.10468	0.00943702	0.0170619	0
EDEM3	-1.78425	0.108286	0.249653	1.85047	0.0968635	0.132601	0
RHOB	-1.79253	0.108297	0.249653	8.99731	1.43498e-06	1.57375e-05	0
CRELD1	-1.73312	0.108676	0.250332	5.91263	0.00010396	0.000392294	0
TMEM43	-1.74408	0.108865	0.250575	2.75172	0.0191094	0.031704	0
RAB3C	3.78596	0.109025	0.250749	13.5269	2.20274e-06	2.11494e-05	0
MPP5	2.07387	0.109676	0.252051	-1.88114	0.0984973	0.134561	0
DDX3Y	2.70167	0.109821	0.252192	0.317797	0.756121	0.794116	0
UHRF2	-1.92937	0.110271	0.252836	1.57346	0.150149	0.194912	0
ATP6AP1	-1.85893	0.110636	0.253283	3.47174	0.00583233	0.0112785	0
PAWR	1.92381	0.110864	0.253609	-2.26178	0.0438291	0.0658686	0
ALDH4A1	1.79978	0.111121	0.253923	-5.67911	0.000111505	0.000414701	0
TRIM32	2.21661	0.111171	0.253923	-2.82729	0.015607	0.0265364	0
FGD5	2.23617	0.111799	0.255012	6.59137	0.000179319	0.000603857	0
HIP1	1.79972	0.111819	0.255012	7.79778	5.24193e-06	4.01966e-05	0
ACSS1	3.89215	0.112015	0.255265	-4.76028	0.000594964	0.0016235	0
NDUFS5	1.7295	0.112148	0.255371	-3.62591	0.00590827	0.0114148	0
DYNLT1	-1.79861	0.112393	0.255735	-6.30988	0.000296119	0.000907079	0
UBE2L3	-1.87174	0.112572	0.255913	-11.2539	1.68111e-06	1.77443e-05	0
ABCB6	1.7463	0.112643	0.255913	-3.28851	0.00673758	0.0127731	0
CLPP	-1.8282	0.112752	0.255967	-10.2988	3.32189e-06	2.8653e-05	0
BNIP1	-1.76776	0.112889	0.256082	-6.79602	0.000150044	0.000524553	0
GHDC	2.1241	0.113351	0.256935	17.5974	9.64428e-09	5.83844e-07	0
DYNC1H1	-1.72407	0.113705	0.25754	-1.65157	0.125726	0.166962	0
CSTF2T	2.43521	0.114137	0.258089	1.88083	0.084874	0.117886	0
RPL38	-2.65161	0.114258	0.258089	-0.731666	0.482525	0.542841	0
AP2M1	-1.77236	0.114337	0.258089	-6.76261	0.00024026	0.000765646	0
NDUFA2	1.75037	0.114419	0.258089	0.406297	0.694559	0.741031	0
ECHS1	1.70254	0.114466	0.258089	-6.25779	0.000131543	0.000472412	0
SCAMP2	1.74765	0.114466	0.258089	1.7536	0.105067	0.142474	0
GATAD2B	2.04558	0.114876	0.258524	3.79164	0.00349347	0.00723586	0
ACOT7	-1.84742	0.114884	0.258524	-6.99281	6.8231e-05	0.000281128	0
TRIM22	2.54743	0.114982	0.258524	6.7422	2.15824e-05	0.000117481	0
FOXRED1	-1.86903	0.115006	0.258524	-9.18884	5.57035e-06	4.22044e-05	0
KPNB1	-1.7535	0.115117	0.258579	-24.828	9.40765e-11	3.96532e-08	0
ANKFY1	1.82676	0.116595	0.261703	0.787673	0.448105	0.508918	0
USP7	1.71874	0.116993	0.262398	-5.63341	0.000324851	0.000980602	0
TMX2	-1.73873	0.117131	0.262492	-5.29038	0.000423691	0.00122263	0
GTF3C1	5.35066	0.117239	0.262492	-4.38826	0.00122787	0.00295122	0
STAG2	-2.04126	0.117299	0.262492	-0.328303	0.750018	0.78895	0
SLC44A1	-1.79961	0.117453	0.26264	1.58416	0.139682	0.18292	0
SRSF4	1.85523	0.11769	0.262972	-1.46706	0.177344	0.225742	0
AARS	-1.84984	0.117877	0.26306	-3.3459	0.0144825	0.0248247	0
EXD2	-1.7837	0.117971	0.26306	-3.12042	0.00900824	0.0163898	0
PTPRA	1.96615	0.117993	0.26306	5.16892	0.000287566	0.000884687	0
SMARCA2	1.74605	0.118283	0.26351	10.0379	2.62824e-06	2.40478e-05	0
TXNDC12	-1.69773	0.118894	0.264673	1.48536	0.165769	0.212699	0
ACP1	1.87711	0.119473	0.265565	-1.86995	0.105023	0.142446	0
ANXA11	1.68928	0.119995	0.266527	3.49238	0.00594192	0.0114693	0
SH3GLB2	1.88111	0.120131	0.26663	-0.0173985	0.986436	0.98886	0
PON2	1.67363	0.120479	0.267204	5.72781	0.000786782	0.00204281	0
PGM3	2.62754	0.120704	0.267504	-7.42082	8.72879e-06	5.91753e-05	0
PGAM1	-1.71906	0.121555	0.269189	-7.97171	1.95423e-05	0.000108669	0
OXSM	2.29977	0.12215	0.270306	-2.74463	0.0257912	0.0410695	0
IBA57	2.28913	0.123004	0.271994	0.922798	0.384956	0.445318	0
STX5	-1.81052	0.123487	0.27286	4.07795	0.00158385	0.00367346	0
DDX17	-1.76901	0.123608	0.272907	7.1273	7.26434e-05	0.000294416	0
STIP1	-1.65541	0.123749	0.272907	-9.48936	4.83908e-05	0.00021691	0
MRPL46	-1.84993	0.123783	0.272907	-5.71649	0.00059518	0.00162374	0
CTBP1	1.91932	0.124406	0.273945	-4.67449	0.000764649	0.00199402	0
EIF2S1	-1.66346	0.124437	0.273945	-10.5537	5.13277e-07	7.76362e-06	0
AP1S2	-1.8738	0.125329	0.275705	-0.00503433	0.996066	0.996618	0
COPS7A	2.76445	0.125429	0.275723	-1.721	0.112939	0.151701	0
SLC25A4	1.67017	0.125854	0.27628	3.20363	0.0120838	0.021134	0
PPOX	-1.92199	0.125868	0.27628	1.88946	0.0891283	0.123065	0
CFL2	2.79308	0.126351	0.276932	-1.80559	0.0964647	0.132127	0
LAMP2	1.74746	0.126873	0.277669	0.0439613	0.965978	0.972283	0
TAP2	2.23143	0.127029	0.277806	0.279443	0.785167	0.819246	0
FLII	-1.66285	0.128138	0.280027	-3.09802	0.0151532	0.0258516	0
GLT8D1	-1.78639	0.129099	0.281396	0.790169	0.45477	0.515561	0
GALK1	1.79307	0.129137	0.281396	-7.6026	2.11544e-05	0.0001158	0
IDH3A	-1.74806	0.129191	0.281396	-7.60016	7.11662e-06	5.09285e-05	0
NUP43	-2.00541	0.129192	0.281396	-8.11287	3.30589e-06	2.8556e-05	0
TIMM8A	1.66626	0.129236	0.281396	-7.07733	1.28764e-05	7.90013e-05	0
LPP	1.72607	0.129466	0.281691	14.3069	4.98936e-08	1.67794e-06	0
GRN	1.63995	0.129599	0.281773	7.23706	1.05615e-05	6.82076e-05	0
FUBP1	-1.6447	0.129733	0.281859	-5.00587	0.00133985	0.00317393	0
ACAT2	3.52498	0.130131	0.282519	-10.7045	8.87329e-06	5.97459e-05	0
NHP2	-1.70134	0.130269	0.282613	-7.77655	7.46873e-05	0.000301251	0
NFKB1	1.71243	0.130901	0.283777	0.143567	0.889124	0.907569	0
CFI	1.66091	0.131226	0.284276	10.7413	5.00285e-06	3.87155e-05	0
GABPA	2.0894	0.131848	0.285416	3.02025	0.0162063	0.0274152	0
PCDH1	1.6536	0.132121	0.285799	1.9888	0.0700361	0.0994282	0
LAMC1	-1.70385	0.132947	0.287041	-3.07543	0.00970186	0.0175062	0
TIMM13	-2.10527	0.132972	0.287041	-7.45869	1.84191e-05	0.000103464	0
PSMC2	-1.61179	0.132984	0.287041	-10.0491	2.96152e-06	2.64094e-05	0
RPL30	-1.61907	0.133101	0.287087	2.94754	0.0211018	0.0345325	0
GPR107	-2.03762	0.133235	0.287152	7.1374	1.3056e-05	7.97939e-05	0
NCDN	2.96984	0.133324	0.287152	-3.60481	0.00581856	0.011257	0
PLEKHO2	2.29274	0.13348	0.287281	7.14551	9.01646e-05	0.000349841	0
GIPC1	-1.84358	0.134178	0.288575	-8.23101	4.34037e-06	3.47807e-05	0
MYH9	1.60523	0.134425	0.288898	2.46572	0.029748	0.046682	0
NIPSNAP2	1.72634	0.134779	0.28945	-2.12614	0.0586082	0.0850959	0
GIT2	4.33286	0.135138	0.290011	-0.889062	0.395584	0.455571	0
SUCLG2	1.65846	0.136407	0.292525	-1.14848	0.275951	0.332546	0
TUBA1C	-1.70088	0.136707	0.29292	-8.69521	6.65278e-05	0.00027539	0
ILF2	-1.59612	0.137058	0.293289	-8.06599	0.000132946	0.0004761	0
SF3B4	1.68697	0.137332	0.293665	-4.63181	0.000693175	0.0018368	0
NAGA	1.65178	0.137903	0.294674	-3.81685	0.00318131	0.00667458	0
ARMCX3	-1.67466	0.138285	0.295279	1.98262	0.0742107	0.10465	0
TRIO	-1.64541	0.138788	0.296062	-0.340011	0.741236	0.781208	0
HARS2	4.10607	0.13885	0.296062	-7.1283	2.8539e-05	0.000145397	0
VAPB	1.68534	0.139304	0.29669	-0.378642	0.712146	0.756629	0
RPRD2	2.99879	0.139344	0.29669	1.53158	0.162888	0.20947	0
AFDN	1.63747	0.139484	0.296704	4.09943	0.00304397	0.00642481	0
ALOX5	2.44394	0.139549	0.296704	9.35529	8.04196e-07	1.05817e-05	0
TMED5	-1.61539	0.139933	0.297128	-2.34412	0.0410887	0.0621938	0
WDR61	1.63298	0.140045	0.297128	-2.03151	0.0754776	0.106211	0
TIMM10	1.64292	0.140048	0.297128	-5.43934	0.000434661	0.00124661	0
MFGE8	1.75177	0.140813	0.29854	9.25447	1.59831e-06	1.69568e-05	0
MRPL57	1.67191	0.141132	0.298668	-10.4838	1.29945e-06	1.45155e-05	0
SPTBN1	1.61686	0.141169	0.298668	6.45493	0.000166486	0.000568687	0
MRPL28	-1.62429	0.141174	0.298668	-6.80719	0.000116352	0.000428444	0
MAGT1	-1.61925	0.141321	0.298768	1.09394	0.298251	0.35616	0
SNRPA1	-1.59824	0.141761	0.299485	-6.61496	6.74686e-05	0.00027844	0
HNRNPH1	-1.60381	0.141893	0.299551	-3.49357	0.00571899	0.0110915	0
BRIX1	-3.21487	0.142182	0.299951	-8.27652	3.3571e-06	2.88387e-05	0
CAP1	-1.58186	0.142654	0.300732	-8.33962	6.29438e-05	0.000264163	0
GNA13	-1.59857	0.142931	0.301065	-1.6681	0.132827	0.175068	0
CDH11	1.69668	0.143014	0.301065	2.8168	0.0247333	0.039584	0
PDP1	1.5669	0.143157	0.301156	-5.88663	0.000100307	0.000381011	0
AIMP1	-1.57643	0.143779	0.30225	-2.05941	0.0715599	0.101341	0
DHRS7	1.58242	0.143893	0.302273	1.66905	0.139367	0.182584	0
AKAP8L	-1.77097	0.144094	0.302273	-0.224178	0.826706	0.855109	0
PDCD5	-1.73035	0.144127	0.302273	-10.08	6.61315e-07	9.17997e-06	0
STX2	2.10405	0.144195	0.302273	-3.80702	0.00249792	0.00543186	0
NDUFA5	1.64499	0.14458	0.30285	0.0252315	0.98056	0.984218	0
ADGRL2	-1.80842	0.144674	0.30285	-1.97375	0.0731451	0.103297	0
TRRAP	1.67902	0.145288	0.303804	0.34507	0.737443	0.777858	0
FARSA	-1.80404	0.145333	0.303804	-10.4884	5.0401e-06	3.89323e-05	0
GAPDH	-1.5611	0.145623	0.303926	-6.63317	5.93563e-05	0.000252714	0
FLNA	1.59021	0.145756	0.303926	2.47137	0.040227	0.0610795	0
SCAMP4	1.71912	0.145759	0.303926	-6.1019	0.00011841	0.000434125	0
GALNT2	-1.61923	0.145799	0.303926	-0.835731	0.419644	0.480565	0
EI24	1.7102	0.14627	0.304695	-12.7855	7.30462e-07	9.88939e-06	0
MELTF	2.16008	0.146629	0.305039	-2.2903	0.0499454	0.073979	0
NCOA5	-1.91452	0.14664	0.305039	-4.44131	0.00125561	0.00300716	0
HMG20A	1.76267	0.14687	0.305304	-0.577934	0.577248	0.634335	0
NDUFB9	-1.60695	0.147169	0.305609	-6.64844	0.000296621	0.000908178	0
EFTUD2	-1.56304	0.147269	0.305609	-7.79601	4.66533e-05	0.000211293	0
EIF3A	-1.56525	0.147324	0.305609	-12.1001	3.90225e-07	6.48409e-06	0
PARVA	1.695	0.147604	0.305979	6.00831	0.000282487	0.000872508	0
DHTKD1	1.64546	0.147834	0.306242	0.821512	0.431507	0.492812	0
WTAP	1.69162	0.148415	0.307199	0.151212	0.883677	0.903104	0
CSRP1	1.54426	0.148502	0.307199	4.02739	0.00173961	0.00397829	0
TIMM8B	-1.68747	0.148864	0.307735	-7.12449	1.63217e-05	9.45432e-05	0
CISD2	1.54806	0.14995	0.309694	-0.0464755	0.964156	0.970758	0
RRBP1	-1.64035	0.150019	0.309694	2.37786	0.0385031	0.0587725	0
POLR2G	3.41634	0.150333	0.310091	-0.0996254	0.923081	0.936637	0
EXOC2	1.76708	0.15042	0.310091	-2.97341	0.0132539	0.0229615	0
GSPT1	-1.76368	0.150684	0.310421	-1.39517	0.210529	0.262901	0
SEC11A	-1.56831	0.15112	0.311105	-0.990779	0.358284	0.418057	0
MAPK1	-1.64095	0.151236	0.31113	-4.57027	0.000745271	0.00195275	0
ICAM1	1.59076	0.151665	0.311518	13.0547	1.94088e-08	8.98526e-07	0
HNRNPA2B1	-1.5598	0.151671	0.311518	-3.51842	0.00537169	0.0105092	0
BOK	1.78108	0.151739	0.311518	1.58294	0.145632	0.189828	0
TMPPE	1.87442	0.152035	0.311912	1.41491	0.183855	0.232857	0
XAB2	-1.76822	0.152457	0.312564	-1.22666	0.245132	0.300167	0
PRAF2	-1.62941	0.152866	0.313185	2.23737	0.0512271	0.0756383	0
PDHA1	-1.52403	0.153605	0.314484	-10.9036	7.08908e-06	5.08172e-05	0
PNP	-1.54642	0.154714	0.316451	-4.46332	0.00088992	0.00226146	0
H2AFY	-1.53506	0.154778	0.316451	-6.39716	0.000225393	0.000727063	0
DHX38	1.65041	0.15513	0.31676	-4.45637	0.000855891	0.00219395	0
SLC41A3	1.5393	0.155164	0.31676	22.8197	4.00615e-11	2.35754e-08	0
APOO	1.74481	0.155247	0.31676	-8.29551	2.66497e-05	0.000138161	0
SEC24D	-1.64457	0.155562	0.317185	-8.40973	3.19419e-05	0.000157355	0
SRSF3	-1.5261	0.155775	0.317403	-5.41612	0.000158315	0.000547241	0
RAPH1	1.72987	0.156121	0.31789	0.293029	0.775633	0.811172	0
HDAC3	2.07617	0.156531	0.318378	-4.64288	0.000906008	0.00229543	0
PCMT1	-1.54071	0.156574	0.318378	-7.75705	3.41432e-05	0.000165736	0
DAD1	-1.51131	0.157447	0.319934	-7.57234	7.4102e-06	5.24621e-05	0
NUFIP2	-1.637	0.157845	0.320526	1.48905	0.162344	0.208813	0
NAXE	1.699	0.158247	0.320577	-5.04206	0.00036707	0.00108525	0
BAG2	-1.55218	0.158287	0.320577	2.87155	0.0161529	0.0273432	0
NOC2L	-2.01922	0.158315	0.320577	-9.8622	1.37867e-06	1.52409e-05	0
DNAJB4	-1.5581	0.158454	0.320577	0.51803	0.616886	0.670955	0
RPA1	1.63744	0.158837	0.32101	-4.6355	0.000908033	0.00229918	0
EIF3H	-1.51124	0.159203	0.321532	-0.352756	0.730423	0.771935	0
SNTB2	1.51938	0.159333	0.321577	5.24302	0.00103553	0.00256097	0
TTC7B	1.71371	0.159771	0.321981	-5.12257	0.000285937	0.000880713	0
MRPL39	-1.55209	0.159857	0.321981	-6.58003	0.000163034	0.000559041	0
FMR1	-1.99702	0.160585	0.32323	1.11213	0.288935	0.346212	0
SYTL4	1.52011	0.160797	0.323438	1.24719	0.241139	0.29601	0
PDLIM7	1.50317	0.160955	0.323475	2.53473	0.0363675	0.0558159	0
MRPS27	-1.51402	0.161032	0.323475	-5.14895	0.00130796	0.00311414	0
CYC1	-1.52667	0.161578	0.324352	-8.65929	6.15684e-06	4.56349e-05	0
INTS13	1.72081	0.161917	0.324813	-13.4142	3.11435e-08	1.22682e-06	0
HIBADH	1.50405	0.16211	0.324982	0.910907	0.392214	0.452472	0
PRDX4	-1.49764	0.162643	0.325572	-8.25969	1.52646e-05	9.00705e-05	0
MRRF	1.74456	0.162723	0.325572	-0.873243	0.410985	0.47146	0
CDC42BPB	1.4874	0.162731	0.325572	3.6985	0.00583039	0.0112782	0
WBP2	1.66834	0.163307	0.326407	1.238	0.246982	0.302127	0
PLA2G4A	-1.53282	0.163477	0.326407	3.00977	0.0127037	0.0221203	0
RAMP2	3.70452	0.163683	0.326579	15.2647	4.06438e-09	3.5199e-07	0
ATXN2	-1.55552	0.163782	0.326579	0.158426	0.877623	0.898419	0
VBP1	1.59088	0.164065	0.326812	-5.49738	0.000409079	0.00118764	0
CAPN1	-1.48358	0.164118	0.326812	-15.7595	2.22327e-09	2.4879e-07	0
GUK1	1.49075	0.164326	0.32684	2.51084	0.0381356	0.0582467	0
ETF1	-1.6595	0.164383	0.32684	-7.41025	8.55711e-05	0.000335935	0
ATG3	1.64692	0.164461	0.32684	-5.14896	0.000307264	0.000934205	0
UBE4A	-1.66239	0.165179	0.328048	-1.533	0.15209	0.197047	0
CUL2	-1.65859	0.165404	0.328155	-6.55901	3.03266e-05	0.000151977	0
PDLIM5	1.49561	0.165453	0.328155	5.3349	0.000771378	0.00200866	0
CLIC4	-1.54032	0.165929	0.328881	-4.57202	0.000645562	0.00173389	0
SLC37A4	1.74218	0.166605	0.330002	-6.97591	0.000152307	0.000530995	0
CALCOCO2	2.02728	0.1674	0.331356	7.55844	9.07872e-06	6.08698e-05	0
NFXL1	2.52922	0.167679	0.331689	0.916222	0.382924	0.44325	0
NUP214	-1.49688	0.16786	0.331689	-2.14841	0.0567369	0.0827781	0
INF2	-1.48709	0.167901	0.331689	-2.4711	0.0453361	0.0678673	0
ESYT1	-1.48262	0.168938	0.333515	-21.7437	1.38628e-09	2.01081e-07	0
COPG1	-1.46337	0.169099	0.333614	-4.44104	0.00170725	0.00391799	0
CMAS	-1.58309	0.169766	0.334248	-4.05853	0.00265489	0.0057191	0
GOLM1	-1.47987	0.169782	0.334248	-0.112775	0.913101	0.927924	0
UQCR10	1.53623	0.169848	0.334248	-9.48827	1.83282e-06	1.87629e-05	0
RAB10	-1.46734	0.169869	0.334248	-6.77718	7.78581e-05	0.000310867	0
AP1M1	-1.49518	0.170421	0.335114	-8.0643	7.80356e-06	5.45171e-05	0
LRRC8C	-1.54364	0.170567	0.335178	-1.43553	0.181402	0.230143	0
PLEC	1.50148	0.17087	0.335507	3.65866	0.00377646	0.00774107	0
DHRS4	1.79136	0.170959	0.335507	-1.18643	0.265546	0.321508	0
PEA15	1.46429	0.171592	0.33635	-0.0333221	0.974017	0.978894	0
FHL1	1.45678	0.171614	0.33635	8.57375	2.19929e-05	0.000119254	0
NUP160	-1.48409	0.171796	0.336425	3.16202	0.00829379	0.0152879	0
ANXA2	-1.47197	0.171878	0.336425	-11.4662	4.30634e-06	3.46177e-05	0
RAB1A	-1.45478	0.172151	0.336738	-3.41822	0.00824332	0.0152059	0
CERS2	-1.54495	0.173477	0.338888	-2.35278	0.0382925	0.0584722	0
S1PR1	1.60179	0.173635	0.338974	4.02513	0.00257931	0.00558482	0
POLR2C	1.46722	0.174004	0.339474	-12.8139	1.12381e-06	1.32068e-05	0
ATXN2L	-2.06649	0.174142	0.33952	-2.44399	0.0389691	0.0593763	0
PDLIM1	1.44552	0.174294	0.339594	2.6715	0.0229327	0.0370445	0
SSR1	-1.44416	0.174566	0.339686	-1.91536	0.0806057	0.1127	0
CCDC90B	2.9743	0.174569	0.339686	-1.82707	0.096351	0.132047	0
OLA1	-1.58764	0.175681	0.341258	-9.55837	8.79501e-07	1.11548e-05	0
CLCC1	-1.60288	0.175683	0.341258	1.33488	0.215389	0.268308	0
VARS	1.53732	0.17572	0.341258	-9.54549	1.75038e-05	9.97456e-05	0
LPCAT3	1.59787	0.176019	0.341394	2.99791	0.0125431	0.0218618	0
NDUFB7	1.44423	0.17628	0.341679	-3.88317	0.00277604	0.00593959	0
YWHAZ	1.43718	0.176528	0.341936	-4.41805	0.000869242	0.00221783	0
GPD2	-1.4338	0.177419	0.34344	-2.90401	0.0132957	0.0230181	0
PDPR	1.44156	0.178111	0.34423	2.44952	0.0345733	0.0533601	0
PPA1	-1.43	0.178236	0.34423	-6.39504	0.00018673	0.000621205	0
IMMT	-1.42993	0.178289	0.34423	-17.2756	1.29204e-07	3.12986e-06	0
RBP1	1.47347	0.179128	0.345627	14.6515	1.71554e-08	8.31151e-07	0
NECTIN2	-1.55599	0.179248	0.345634	0.465513	0.655023	0.705818	0
ANO10	-1.56987	0.179822	0.346517	-1.9051	0.0817555	0.114169	0
RASIP1	1.46699	0.180039	0.346571	-3.1765	0.00911771	0.0165628	0
SOAT1	-1.61626	0.180082	0.346571	-4.43467	0.00165243	0.00380393	0
SEPHS1	1.60098	0.180395	0.34676	-5.72927	0.000149684	0.000523584	0
DCP1A	-1.4709	0.180413	0.34676	-3.61932	0.00784943	0.014575	0
SPCS2	-1.43096	0.180562	0.346773	-0.749565	0.471798	0.532478	0
DDOST	1.47609	0.180724	0.346773	-1.67017	0.135395	0.178044	0
CANX	-1.44263	0.180769	0.346773	-1.59052	0.138304	0.181323	0
TPI1	-1.42715	0.181128	0.34724	-5.17418	0.0014199	0.00334165	0
PSMD2	-1.42646	0.181545	0.347815	-25.6726	1.98543e-09	2.34633e-07	0
MMP2	-1.46008	0.182456	0.348889	9.7505	4.94936e-07	7.58601e-06	0
HSP90AB1	-1.43355	0.183051	0.349699	-5.54734	0.000783787	0.00203678	0
SRSF1	-1.41369	0.183114	0.349699	-9.34261	8.95148e-07	1.12628e-05	0
VWF	1.45051	0.183693	0.35058	16.8813	2.84343e-08	1.15669e-06	0
ZNF207	1.62863	0.184247	0.351413	-6.09406	0.00043111	0.00123754	0
CFL1	-1.42447	0.184759	0.352163	-15.0135	4.88072e-07	7.53893e-06	0
HNRNPH3	-1.41453	0.185131	0.352647	-0.954256	0.366365	0.426307	0
PCCA	1.44319	0.186293	0.354622	7.16388	1.50593e-05	8.92754e-05	0
TTLL12	1.68551	0.186406	0.354622	-13.1905	1.67432e-08	8.29366e-07	0
SIAE	2.03548	0.187146	0.35559	3.23348	0.00806773	0.0149278	0
TBRG4	-1.77975	0.187153	0.35559	-7.16902	0.000123937	0.000449822	0
HSPG2	-1.40686	0.187601	0.356216	6.22809	0.000102787	0.000388913	0
PEX3	-1.58468	0.187981	0.356655	-2.33844	0.0395579	0.0601358	0
EIF3B	-1.39792	0.188072	0.356655	-14.8602	1.84278e-07	4.03147e-06	0
PGM2	1.57117	0.189067	0.358315	1.95015	0.0755536	0.106271	0
HNRNPA1	-1.48387	0.189351	0.358625	-0.0134514	0.989494	0.991375	0
MYCBP	-1.43662	0.189861	0.359119	-7.33117	9.54137e-06	6.29372e-05	0
RAB4A	1.93744	0.190127	0.359119	4.66366	0.000612739	0.00166531	0
MTIF2	1.9072	0.190142	0.359119	-6.6652	0.000296975	0.000908822	0
MAT2B	1.5729	0.190214	0.359119	-1.14725	0.289139	0.346424	0
DPP4	1.4594	0.190447	0.359331	-0.511831	0.622924	0.676417	0
MCTP1	-1.54225	0.190781	0.359509	1.28729	0.224568	0.278207	0
GNB3	3.09252	0.190782	0.359509	-1.53012	0.164215	0.211026	0
DBNL	-1.38674	0.190948	0.359595	-3.27045	0.00860849	0.0157737	0
EIF3M	1.39074	0.191198	0.359839	-5.9021	0.000126252	0.000456521	0
CASK	1.873	0.191518	0.360194	3.78826	0.00501319	0.00991116	0
CCDC51	1.76868	0.191628	0.360194	-7.40073	8.29312e-06	5.70236e-05	0
SHC1	2.10135	0.191856	0.360395	-3.77112	0.00662584	0.0125934	0
AGPAT5	-2.00216	0.192424	0.361234	-7.11558	6.16097e-05	0.000260292	0
NAMPT	-1.71095	0.19326	0.362485	2.09216	0.0762014	0.107063	0
SYMPK	-1.43359	0.193333	0.362485	-3.7013	0.00340845	0.00708181	0
DCXR	-1.4311	0.193879	0.363279	-11.2871	1.09191e-06	1.29889e-05	0
CCT6A	-1.38441	0.194129	0.363416	-10.0831	1.66501e-05	9.58744e-05	0
GGT5	1.42234	0.194196	0.363416	-4.8613	0.000394503	0.00115394	0
RAI14	-1.40009	0.194504	0.363765	-5.3189	0.000335285	0.00100873	0
SF1	-1.46347	0.194816	0.36412	-1.45522	0.180592	0.229322	0
GOT1	1.71001	0.195162	0.364342	-7.05493	1.51791e-05	8.97756e-05	0
SCFD2	-1.39082	0.195272	0.364342	-2.6567	0.0274874	0.0434745	0
RANBP1	-1.43789	0.195301	0.364342	-16.3326	1.96623e-07	4.17164e-06	0
CCT8	-1.36918	0.196063	0.365535	-9.66671	4.02686e-06	3.28514e-05	0
ERLEC1	-1.41245	0.196354	0.365849	4.58715	0.00161812	0.00373651	0
COMT	1.36881	0.196796	0.366372	-0.0556967	0.956704	0.964253	0
SFXN3	1.37029	0.196935	0.366372	3.08565	0.0114662	0.0201852	0
PHF5A	-1.38701	0.197003	0.366372	-8.27867	5.57641e-05	0.000241386	0
DDX46	-1.39242	0.197273	0.366646	-13.3595	1.55899e-08	7.88535e-07	0
TTC17	-2.04569	0.19765	0.367018	11.5178	1.63325e-07	3.73463e-06	0
GID8	1.57726	0.197746	0.367018	0.100319	0.922717	0.936342	0
ST3GAL1	2.56021	0.197876	0.367018	7.3782	5.36562e-05	0.000234932	0
RAB35	-1.43763	0.198041	0.367018	-7.1224	0.00011065	0.000412128	0
MMRN2	-1.3748	0.198089	0.367018	20.7848	2.28498e-10	6.87941e-08	0
C1orf21	3.08708	0.198322	0.367221	2.40745	0.0339733	0.052543	0
SNRNP70	-1.40486	0.198699	0.367692	-2.056	0.0649912	0.0930918	0
TOR1A	-1.3755	0.199025	0.368066	-7.36494	5.9265e-05	0.00025241	0
NDUFA10	-1.38851	0.199424	0.368403	-2.04899	0.0694887	0.0987175	0
TIPRL	3.08616	0.199454	0.368403	-3.04254	0.0109149	0.0193413	0
CAPZA1	1.35919	0.200157	0.369253	-15.0004	2.86205e-08	1.15669e-06	0
CALR	-1.40154	0.200162	0.369253	-3.65835	0.0082066	0.0151493	0
TSPO	-1.38059	0.200287	0.369257	-3.17576	0.0105957	0.0188496	0
HNRNPL	-1.36347	0.200736	0.369855	-6.25032	7.15368e-05	0.000290769	0
ARF4	-1.35798	0.202777	0.373218	-7.6273	1.33531e-05	8.13345e-05	0
CIB1	1.60224	0.202811	0.373218	-1.6488	0.129382	0.171044	0
RHOT2	-1.36344	0.20326	0.373755	-5.01005	0.000445262	0.00127153	0
GMPPA	1.46652	0.203354	0.373755	-3.73089	0.00432403	0.00870936	0
CIAPIN1	1.56625	0.203593	0.373965	-8.76045	3.56349e-05	0.000171528	0
TMED4	-1.35437	0.203993	0.374354	-4.80228	0.000445431	0.00127172	0
ZFPL1	-1.60927	0.204056	0.374354	0.352327	0.733136	0.774155	0
CPSF2	-1.35455	0.204572	0.374882	-11.3593	8.92036e-08	2.39996e-06	0
NUP133	-1.38973	0.20467	0.374882	-5.4084	0.000325704	0.000982941	0
LCP1	1.35974	0.204721	0.374882	6.382	4.13136e-05	0.000191781	0
TUFM	1.34559	0.205388	0.375872	-9.10589	1.53173e-05	9.02972e-05	0
MRC2	1.35384	0.205596	0.376023	3.42588	0.00504914	0.00997287	0
GIGYF2	-2.04469	0.205827	0.376215	3.30905	0.00812448	0.0150196	0
ZNF638	-2.20757	0.206212	0.376687	5.72476	0.000116222	0.000428087	0
PREB	-1.3738	0.206772	0.377081	-8.94889	1.35119e-05	8.19586e-05	0
CCT3	-1.34607	0.206807	0.377081	-8.34936	7.97179e-05	0.000317191	0
SLMAP	1.60309	0.207602	0.378069	9.01875	5.59755e-05	0.000241904	0
RAB8B	-1.38196	0.208562	0.379133	-2.23672	0.0452954	0.0678197	0
CCT4	-1.33429	0.208568	0.379133	-8.37754	4.42479e-05	0.000202429	0
PCM1	-1.42468	0.209099	0.379673	3.67734	0.00331055	0.0069079	0
PAFAH1B1	-1.35695	0.209119	0.379673	0.423309	0.680367	0.728532	0
STAB1	-1.34161	0.209538	0.379918	1.2885	0.227594	0.28151	0
MAP2K1	1.39713	0.209637	0.379918	-9.75335	3.51682e-05	0.000169952	0
ATP6V1E1	1.45992	0.210011	0.380181	-0.838099	0.428229	0.489553	0
TMEM109	1.34852	0.210036	0.380181	-2.91496	0.015738	0.0267303	0
CD2AP	1.38387	0.210623	0.38078	-0.907668	0.390114	0.450378	0
POLR2A	-1.34471	0.211368	0.381751	0.256956	0.801937	0.833535	0
SLC12A9	1.35284	0.21145	0.381751	1.54102	0.15416	0.1993	0
SF3B6	-1.31942	0.211649	0.381751	-7.41785	2.23671e-05	0.000120714	0
TPBG	1.41393	0.211685	0.381751	8.0769	0.000105827	0.00039815	0
TSPAN6	1.49948	0.211817	0.381751	5.39315	0.00111093	0.00271558	0
KDELC2	1.34667	0.211927	0.381751	0.551095	0.594612	0.650308	0
PSMC3	1.31615	0.212712	0.382701	-10.0727	4.27054e-06	3.43737e-05	0
SLC25A1	-1.44003	0.212997	0.382984	-7.75066	1.56941e-05	9.18331e-05	0
AGTRAP	1.56755	0.213147	0.383022	-0.433075	0.675414	0.724261	0
TPM2	1.33155	0.213494	0.383415	4.20685	0.00214819	0.00477757	0
PDLIM4	-1.32509	0.214643	0.385115	1.70114	0.13468	0.17721	0
SDCBP	1.31521	0.214699	0.385115	1.1748	0.262961	0.318897	0
TXN2	1.56538	0.214875	0.3852	-7.75879	9.6913e-06	6.37176e-05	0
MRPS31	-1.32582	0.215761	0.386324	-0.803129	0.445961	0.506665	0
PLTP	1.38233	0.216267	0.386804	4.17952	0.00448677	0.00899416	0
DGAT1	1.75784	0.216288	0.386804	4.15196	0.00278605	0.00595395	0
MTA2	-1.32286	0.216444	0.38685	-9.51418	5.91538e-06	4.41819e-05	0
DHRS1	-1.31563	0.216584	0.386868	-0.330545	0.746704	0.785988	0
NSUN2	1.35378	0.218293	0.389577	-12.3252	7.09168e-08	2.08906e-06	0
RAP1A	1.33726	0.218361	0.389577	3.62565	0.00526232	0.0103326	0
GATAD1	1.37905	0.218728	0.389997	2.85006	0.018309	0.0305312	0
DNAJB11	-1.31616	0.219434	0.391023	-3.83659	0.00340466	0.00707509	0
NME1	-1.35007	0.21977	0.391388	-9.59736	2.92319e-05	0.000147855	0
SREK1	2.57151	0.220279	0.39206	-0.255862	0.804914	0.836015	0
ABHD12	-1.30572	0.220934	0.392588	-4.11016	0.00272867	0.0058531	0
PFKP	-1.29209	0.220961	0.392588	-6.21122	0.000199089	0.00065679	0
NANS	1.34587	0.221004	0.392588	-5.0687	0.00150726	0.00351712	0
RSF1	-1.35681	0.221102	0.392588	5.93497	0.000376624	0.0011096	0
CNN2	-1.33209	0.221363	0.392596	-6.45352	0.000156582	0.000542164	0
TSN	1.442	0.22137	0.392596	-6.40454	5.94021e-05	0.000252824	0
GOLGA7	-1.35728	0.222385	0.394162	4.60513	0.000645905	0.00173407	0
ALDH2	1.29659	0.222796	0.394655	12.3611	6.95473e-08	2.0706e-06	0
ACADSB	1.35889	0.224704	0.397799	-0.387637	0.707035	0.75212	0
UFSP2	-1.30293	0.225099	0.398262	-0.085645	0.934032	0.945775	0
COPS8	1.45324	0.225572	0.398568	-6.08085	9.06125e-05	0.000351148	0
ALDH3A2	1.29779	0.225925	0.398568	1.52503	0.153324	0.198381	0
YWHAE	1.27723	0.225947	0.398568	-13.2255	2.19869e-08	9.59347e-07	0
CISD1	1.29554	0.226008	0.398568	-8.08915	8.12715e-05	0.000322055	0
ITGB3	-1.36411	0.226162	0.398568	1.72868	0.110594	0.148962	0
COPB1	-1.2957	0.226174	0.398568	-6.26096	9.75648e-05	0.000372676	0
CHP1	-1.28984	0.226207	0.398568	3.28575	0.00651405	0.0124126	0
PPT1	1.33646	0.226492	0.398834	-3.06117	0.00994195	0.0178726	0
FAF2	-1.27929	0.227127	0.399717	-6.31125	3.94863e-05	0.00018515	0
SPCS3	-1.29881	0.22762	0.400199	-0.389569	0.703837	0.74916	0
LGALS3	1.38035	0.227669	0.400199	5.83069	0.000144486	0.000509203	0
COX5B	-1.27084	0.227898	0.400365	-0.509669	0.624085	0.677561	0
G6PD	-1.27935	0.228359	0.400749	-6.28426	0.00018303	0.000612926	0
PSMB2	-1.45707	0.228478	0.400749	-19.3085	3.84917e-09	3.42766e-07	0
PIR	2.06598	0.22852	0.400749	-0.945854	0.371172	0.431266	0
SYNE2	1.27961	0.229573	0.401888	11.3551	2.09971e-07	4.35975e-06	0
PAFAH1B3	2.09363	0.230115	0.4026	-4.3161	0.00158508	0.00367503	0
STAM	1.36693	0.230261	0.40262	-0.639452	0.539084	0.598851	0
CUL1	1.53961	0.23068	0.403115	-7.26267	1.61805e-05	9.40271e-05	0
SAMM50	-1.26789	0.231112	0.403635	-6.66895	3.07687e-05	0.000153328	0
VASP	-1.30196	0.231565	0.404189	-5.43016	0.00129854	0.00309462	0
MRGBP	1.68965	0.232159	0.404988	-10.0285	5.82103e-07	8.39304e-06	0
VANGL1	1.35833	0.232503	0.405352	1.21012	0.259011	0.314862	0
STXBP1	-1.30721	0.232786	0.405608	2.00778	0.0754983	0.106229	0
M6PR	-1.2696	0.235308	0.409523	-4.10962	0.00376549	0.00772463	0
PDS5A	1.36941	0.236011	0.410507	-5.90803	7.76003e-05	0.000310426	0
COX7A2	1.33235	0.236229	0.410627	-4.89565	0.00110575	0.00270607	0
EHD1	1.24522	0.236884	0.410627	-3.15323	0.00914707	0.0166089	0
BMX	1.28766	0.236888	0.410627	6.9875	4.38774e-05	0.000201317	0
ERP29	-1.27236	0.2371	0.410627	-1.04601	0.323603	0.382427	0
RBM4	-2.10894	0.237132	0.410627	1.4936	0.173473	0.221415	0
INTS9	2.12973	0.237257	0.410627	0.461639	0.652839	0.703704	0
ACVRL1	-1.69559	0.23736	0.410627	6.62732	0.000366792	0.00108468	0
PNPT1	-1.26221	0.237419	0.410627	-8.33615	3.60358e-06	3.05001e-05	0
CAPNS1	1.24742	0.237487	0.410627	0.582062	0.572755	0.63022	0
LDHB	-1.27167	0.237804	0.410753	-7.94721	4.09122e-05	0.000190336	0
TRIM4	1.28484	0.238571	0.411838	5.06079	0.000400541	0.00116689	0
AP2A2	1.24415	0.240143	0.414268	-0.159567	0.876264	0.897416	0
CCAR2	1.24181	0.24039	0.414268	-11.8398	1.89533e-06	1.90816e-05	0
ITGA3	-1.24567	0.240395	0.414268	5.31076	0.000282322	0.00087221	0
SPG21	-1.2666	0.241117	0.415272	-2.44562	0.0343574	0.0530787	0
PIK3C3	1.45241	0.241371	0.415454	12.1083	3.12337e-07	5.58997e-06	0
GTF2I	-1.29604	0.241501	0.415454	1.61364	0.135709	0.178383	0
CYB5R1	1.24591	0.241965	0.416013	6.25016	4.40446e-05	0.000201718	0
ZCCHC8	-1.4368	0.24375	0.418133	-1.4006	0.18671	0.236	0
GCLM	1.30116	0.243759	0.418133	-9.35645	3.88959e-06	3.21463e-05	0
PRPF4	-1.25813	0.24395	0.41822	-12.105	4.21358e-07	6.78736e-06	0
CCT5	-1.23016	0.244499	0.418921	-10.6854	2.38898e-05	0.000126767	0
BUB3	-1.25533	0.245186	0.419856	-22.9823	7.83684e-11	3.41814e-08	0
MSN	-1.26867	0.245416	0.420008	-4.307	0.00220832	0.00488527	0
ZW10	-1.23521	0.245972	0.42072	-14.2439	1.3301e-06	1.47925e-05	0
CYB5R3	1.22573	0.246787	0.421447	1.95627	0.0790559	0.110717	0
DSP	1.23631	0.246882	0.421447	3.57645	0.00713949	0.0134264	0
VKORC1L1	1.72272	0.246963	0.421447	-1.56318	0.156989	0.202564	0
CPSF3	1.23852	0.247277	0.42171	-7.70774	0.000219085	0.000710158	0
CRTAC1	1.34825	0.2474	0.42171	9.97704	3.73606e-07	6.31301e-06	0
SRP9	-1.23459	0.247594	0.421801	-2.16209	0.0634974	0.0911896	0
SRSF5	-1.37253	0.248146	0.4225	8.40557	1.14818e-05	7.24789e-05	0
DCN	1.28528	0.250796	0.426664	8.16293	7.73503e-06	5.41281e-05	0
DCLK1	1.51051	0.250916	0.426664	5.41977	0.00053215	0.00147891	0
USP14	-1.22303	0.251021	0.426664	-2.32171	0.0389872	0.0593967	0
ARHGDIB	-1.2172	0.251957	0.428011	-6.50276	8.41838e-05	0.000331106	0
SERPINH1	-1.23615	0.252154	0.428103	-0.847536	0.42205	0.482903	0
CNPY3	1.40262	0.253276	0.429763	3.3241	0.0101744	0.018218	0
PFDN4	1.31169	0.254116	0.430942	-5.57703	0.000299836	0.000915645	0
STX8	1.35885	0.254869	0.431794	-2.68599	0.0204817	0.0336659	0
TRIM25	1.24833	0.254908	0.431794	-3.31784	0.00666949	0.0126668	0
ATP6V0D1	-1.19616	0.255351	0.432299	-4.42569	0.00296219	0.00627524	0
YLPM1	-1.84348	0.255795	0.432419	1.44305	0.186374	0.235634	0
RAD50	1.22765	0.255945	0.432419	-3.31569	0.00777267	0.0144495	0
CCAR1	-1.25261	0.256002	0.432419	-7.04008	6.54529e-05	0.000271896	0
ERO1A	-1.20897	0.256473	0.43262	-4.19663	0.00268951	0.00577499	0
STIM1	-1.19964	0.256486	0.43262	4.54588	0.00067324	0.00179375	0
SLC30A1	-1.2035	0.256555	0.43262	1.7616	0.115923	0.15528	0
LIN7C	1.3131	0.257028	0.433172	-0.055905	0.95664	0.964253	0
PSMA2	-1.24527	0.258082	0.434703	-3.67695	0.00372051	0.00764725	0
EPS15L1	1.2112	0.258287	0.434803	0.159917	0.876654	0.897667	0
ISOC2	1.2067	0.258765	0.435335	-2.44776	0.0307856	0.0481608	0
RHOG	-1.29316	0.258895	0.435335	-3.07166	0.0136556	0.0235733	0
LIG3	1.51934	0.259094	0.435424	-0.889243	0.392378	0.452579	0
ASPH	1.19029	0.259472	0.435799	-6.03846	6.12907e-05	0.000259291	0
CTSZ	1.19563	0.259618	0.435799	2.28206	0.0532386	0.0782702	0
RAB8A	1.2194	0.259755	0.435799	-12.5124	2.14341e-07	4.42867e-06	0
AGL	1.33327	0.260356	0.43656	2.40471	0.0345526	0.0533461	0
ITGB4	1.2069	0.260646	0.436629	6.4014	0.000212495	0.000692822	0
OGT	-1.20074	0.260689	0.436629	1.95419	0.0804178	0.112475	0
GOLGB1	-1.22733	0.261064	0.437011	11.3115	2.64548e-06	2.41406e-05	0
POLR2H	-1.31115	0.262712	0.439276	-3.02707	0.0168372	0.0283525	0
XPO1	-1.17887	0.263446	0.440204	-4.19648	0.00130099	0.00309988	0
GAS6	2.26969	0.263561	0.440204	18.9566	5.23183e-10	1.18137e-07	0
SH3BP4	1.32952	0.264248	0.441103	2.51147	0.0315965	0.0493196	0
ATL2	-1.19385	0.264785	0.441517	7.3968	3.51731e-05	0.000169952	0
WDR26	-1.20279	0.264792	0.441517	1.39627	0.208647	0.260706	0
CDC27	-1.28995	0.265216	0.441978	-3.52445	0.00683318	0.0129156	0
SNRPA	-1.27149	0.265405	0.442046	-15.9644	4.78744e-08	1.63614e-06	0
AP3M1	-1.18149	0.265593	0.442108	-9.13162	2.11873e-06	2.06564e-05	0
SEC61B	-1.20709	0.265739	0.442108	-17.0894	8.73339e-10	1.4731e-07	0
HAX1	-1.20692	0.266715	0.443484	-5.41623	0.000716128	0.00188852	0
MRPS9	-1.34061	0.267177	0.444004	-5.48935	0.000158448	0.000547426	0
KPNA3	-1.17754	0.267743	0.444699	-5.04094	0.00030169	0.000920134	0
UTRN	1.21138	0.268028	0.444924	1.15387	0.283159	0.340105	0
HVCN1	2.14644	0.269782	0.447586	7.7102	7.88509e-06	5.48745e-05	0
GOLGA4	-1.19191	0.27119	0.449672	-1.42428	0.180761	0.229467	0
SSBP1	-1.19984	0.271466	0.449879	-10.7868	5.63061e-06	4.25433e-05	0
KIF23	-1.3749	0.271783	0.450155	-15.2088	7.93409e-07	1.05314e-05	0
ALDH9A1	1.17025	0.271941	0.450166	0.437142	0.67359	0.722516	0
PAPSS1	1.33887	0.272115	0.450204	0.263326	0.799858	0.832103	0
PSMD6	-1.15643	0.272391	0.450397	-8.15538	9.36793e-06	6.21497e-05	0
HS2ST1	-1.1837	0.272533	0.450397	-0.407673	0.691111	0.737975	0
SUMF1	1.18982	0.272912	0.450477	3.3381	0.00609479	0.0117197	0
PSMC5	-1.15189	0.273034	0.450477	-7.18073	1.33974e-05	8.14469e-05	0
PARP4	-1.21641	0.273035	0.450477	-4.78969	0.000743848	0.00194982	0
TOP1	-1.37363	0.274017	0.451826	-2.1116	0.0584521	0.0849376	0
PARP14	1.96388	0.274155	0.451826	5.65999	0.000395751	0.00115652	0
ZC3H7B	1.23299	0.275012	0.452737	-3.06065	0.0103252	0.018436	0
UQCC2	1.23908	0.275532	0.453344	-8.14823	1.69828e-05	9.72291e-05	0
CSTF1	-1.20667	0.275809	0.453549	-10.5025	9.03646e-07	1.1331e-05	0
CCDC50	1.19651	0.276491	0.454295	-1.74587	0.107162	0.144973	0
SNRPB2	1.61288	0.276567	0.454295	-7.45164	2.56594e-05	0.000134192	0
GOLGA1	1.25717	0.277039	0.454707	3.51322	0.0043419	0.00873422	0
TXNDC5	-1.1577	0.277168	0.454707	1.21592	0.247934	0.303145	0
PSMA7	1.1477	0.277275	0.454707	-7.6092	4.94741e-05	0.000220437	0
PDE12	-1.16726	0.278101	0.455675	-4.4067	0.000875289	0.00222966	0
SAR1A	1.83875	0.278324	0.455675	-0.163761	0.872648	0.894144	0
MAP1A	1.73782	0.278649	0.455957	-0.742378	0.478402	0.538826	0
BAG3	1.1552	0.278892	0.456105	-2.03468	0.0668121	0.095462	0
EPB41L3	1.14136	0.279377	0.456641	4.23977	0.00120029	0.00289816	0
SLC16A1	-1.16649	0.279526	0.456641	-7.51716	9.79898e-06	6.43679e-05	0
UBXN4	-1.13239	0.279863	0.45694	1.07262	0.305654	0.363865	0
ERLIN1	-1.13132	0.280024	0.456953	-3.21771	0.0129941	0.0225593	0
PSMB7	-1.14699	0.28039	0.457301	-7.30107	0.000133787	0.000478557	0
PAFAH1B2	-1.1438	0.281057	0.458138	-3.9387	0.00366896	0.0075548	0
RELA	1.14285	0.281904	0.459268	1.97342	0.0769698	0.108071	0
TRA2A	-1.18674	0.282556	0.460078	0.525848	0.609234	0.663774	0
TXNRD2	1.19632	0.283229	0.460923	-6.13244	8.90223e-05	0.000346472	0
MAN1A2	-1.32036	0.284241	0.461831	9.40149	1.16175e-05	7.30861e-05	0
PDIA5	1.16453	0.284252	0.461831	-1.40133	0.195013	0.245489	0
PPP1CA	1.12562	0.284637	0.462206	-9.37785	6.41803e-06	4.7047e-05	0
SCFD1	-1.12055	0.286523	0.464514	-2.31178	0.0422961	0.0638075	0
TYK2	2.06943	0.286523	0.464514	-0.165004	0.873706	0.895156	0
SUGT1	-1.31221	0.286526	0.464514	1.20199	0.254022	0.30969	0
TGFB1I1	1.2101	0.287118	0.464537	-5.45756	0.000186381	0.00062049	0
HSPA1A	1.12176	0.28713	0.464537	5.60762	0.00107103	0.00263282	0
GTF3C4	1.8234	0.287163	0.464537	-10.9904	6.19984e-07	8.73991e-06	0
POFUT2	-1.2789	0.288094	0.465791	1.39893	0.19374	0.243959	0
PROCR	1.13741	0.28936	0.467585	3.70825	0.00470587	0.0093695	0
CSNK2B	1.10868	0.289543	0.467627	-5.2274	0.000359029	0.00106636	0
LMF2	-1.15877	0.290345	0.468668	-4.55378	0.00124468	0.00298596	0
ECSCR	-1.21501	0.291215	0.469819	1.62623	0.150298	0.195065	0
MPRIP	-1.13791	0.291536	0.469941	0.042716	0.966965	0.973199	0
NACA	-1.10425	0.291703	0.469941	0.910884	0.394242	0.454397	0
SNRPE	-1.29413	0.291763	0.469941	-5.25518	0.000282836	0.000872887	0
IFI16	-1.15978	0.292412	0.470732	-2.69932	0.0202368	0.0333065	0
NSMCE4A	1.21063	0.292942	0.47133	-3.43466	0.0114017	0.0200968	0
OXA1L	-1.12356	0.293514	0.471682	-6.11691	0.00018311	0.000613033	0
NFIC	1.87413	0.293713	0.471682	1.38029	0.198215	0.249049	0
ACO1	1.24676	0.293793	0.471682	-8.47523	2.29155e-06	2.16729e-05	0
PPP2R5E	1.98814	0.294214	0.471949	-0.355052	0.729257	0.771114	0
ARHGAP17	1.13665	0.294321	0.471949	-0.489776	0.637182	0.689172	0
IPO7	-1.10552	0.294434	0.471949	-4.83391	0.000551204	0.00152316	0
SRSF11	-1.12402	0.294816	0.472308	-1.22034	0.265481	0.321463	0
PGM5	1.12605	0.296957	0.474905	5.8549	0.000861766	0.00220365	0
PTPRJ	1.14251	0.297009	0.474905	5.6026	0.00013946	0.000494524	0
ATP6V1B2	-1.12163	0.297074	0.474905	-4.78515	0.00200019	0.00449482	0
NDRG2	1.17511	0.297476	0.475292	6.7931	0.000206504	0.000675824	0
HEBP1	-1.29503	0.298335	0.476186	-1.51229	0.157376	0.20298	0
RUFY1	1.20194	0.298662	0.476422	0.579232	0.576942	0.634054	0
COPZ1	1.26071	0.299641	0.477472	-7.3569	6.48698e-05	0.000269828	0
COX4I1	-1.08415	0.300199	0.478107	-1.94092	0.0829755	0.115566	0
PLSCR4	-1.09085	0.300935	0.479023	6.18646	7.60715e-05	0.000305515	0
PTX3	-1.09602	0.301159	0.479124	-9.52588	4.60291e-06	3.63547e-05	0
EXOC7	1.14244	0.301479	0.479378	1.17278	0.265824	0.321752	0
TWF2	-1.25328	0.301972	0.479906	-7.36736	4.49685e-05	0.000205354	0
PSMD12	-1.07757	0.30369	0.482379	-6.24498	5.35115e-05	0.00023446	0
LAMB1	-1.08186	0.305041	0.483948	5.28611	0.000669998	0.00178624	0
STRAP	-1.09521	0.305087	0.483948	-9.12744	9.89341e-07	1.21106e-05	0
RPS12	-1.07192	0.305165	0.483948	1.41638	0.1965	0.247213	0
PIP4K2A	1.16828	0.305965	0.484444	1.08597	0.318677	0.377133	0
PABPN1	-1.13845	0.306167	0.484507	-4.09399	0.00172737	0.00395628	0
GFM1	-1.07261	0.30855	0.487761	-4.25334	0.00214521	0.00477237	0
SRSF10	-1.16087	0.309632	0.489211	-2.28086	0.0450965	0.0675806	0
NKIRAS2	1.83058	0.311609	0.491907	-2.70843	0.0199421	0.0328814	0
ACLY	-1.07395	0.311667	0.491907	-11.1983	3.60214e-06	3.05001e-05	0
OS9	-1.07118	0.313788	0.49475	7.10514	1.26571e-05	7.79943e-05	0
MED17	1.76747	0.3138	0.49475	-7.56492	2.58787e-05	0.000134839	0
MCCC1	1.06419	0.315322	0.496887	-0.969712	0.363218	0.423152	0
PIGS	-1.23747	0.316384	0.498296	-2.00969	0.0697315	0.0990179	0
COMMD9	1.8011	0.317132	0.499211	-11.5757	2.49131e-06	2.30789e-05	0
PRPSAP1	1.15156	0.317325	0.499252	-3.61462	0.00526556	0.0103358	0
DHX29	1.43258	0.317578	0.499385	-10.7974	4.49611e-07	7.08895e-06	0
P4HB	-1.05592	0.31784	0.499502	-6.51428	0.000428107	0.00123088	0
ABCF1	-1.10603	0.317986	0.499502	-8.10058	0.000105218	0.000396211	0
PRKAR2A	1.06864	0.319139	0.501048	-16.2075	4.06773e-08	1.45712e-06	0
DIDO1	1.76167	0.319629	0.501553	-1.80985	0.0966216	0.132299	0
BCS1L	-1.04135	0.320479	0.502398	-8.04621	1.51012e-05	8.9482e-05	0
SLC25A11	-1.04971	0.320504	0.502398	-8.05929	1.1439e-05	7.23081e-05	0
CSTF2	-1.07943	0.320873	0.502712	-9.90993	3.54902e-06	3.01392e-05	0
KPNA6	-1.12379	0.321782	0.503872	-6.72413	2.54443e-05	0.000133282	0
ATP6V1H	1.67881	0.322833	0.50515	-4.10388	0.0034869	0.00722462	0
FKBP2	1.04299	0.322937	0.50515	-0.113851	0.911238	0.926424	0
NDUFAB1	1.04315	0.323274	0.505413	-11.6634	1.10763e-06	1.31142e-05	0
EMC3	-1.03932	0.323504	0.505507	-0.417697	0.689675	0.736566	0
RAN	-1.03308	0.324001	0.506018	-10.1244	1.21191e-05	7.53792e-05	0
TNPO1	-1.03349	0.324508	0.506544	-13.9176	3.42455e-07	5.97288e-06	0
ARL6IP5	-1.03686	0.325719	0.508027	5.53513	0.000136505	0.000486366	0
PRDX6	1.02563	0.325798	0.508027	-7.17865	0.000113486	0.000419969	0
PACSIN2	1.03255	0.326164	0.508332	2.0717	0.0701097	0.0995103	0
MRPS10	1.09654	0.326512	0.508425	-11.3611	8.96499e-06	6.02991e-05	0
PSMC1	-1.03035	0.326732	0.508425	-6.46123	0.000426704	0.00122796	0
VCP	-1.02286	0.326769	0.508425	-6.6908	0.000109248	0.000408263	0
ECE1	-1.04865	0.327036	0.508425	1.62862	0.135515	0.178165	0
RAB27A	1.03122	0.327076	0.508425	2.98222	0.0118352	0.0207568	0
LSM14A	1.72246	0.328315	0.510085	1.72651	0.109978	0.148212	0
MTA1	-1.03081	0.330012	0.512206	-3.48816	0.00772933	0.0143858	0
RPS4X	-1.01994	0.330189	0.512206	1.19881	0.260841	0.316756	0
ARSA	1.26118	0.330195	0.512206	-3.83708	0.00405891	0.00823834	0
PRDX5	1.0178	0.330395	0.51225	-2.70408	0.0197447	0.0325985	0
SUN1	-1.02839	0.330913	0.512372	5.87562	0.000460088	0.00130767	0
ACTR1B	1.03876	0.33124	0.512372	4.12529	0.00140745	0.00331604	0
SNX6	1.0827	0.3313	0.512372	-4.96709	0.000407625	0.00118438	0
FAHD1	-1.01778	0.331333	0.512372	-7.83554	9.61677e-05	0.000368944	0
AGPAT3	-1.04651	0.332777	0.514338	-6.95986	1.5298e-05	9.02254e-05	0
SPRYD4	1.06333	0.333555	0.515179	-7.86278	2.24699e-05	0.000120959	0
DDX24	-1.04353	0.33382	0.515179	2.43244	0.040602	0.0615602	0
CMPK1	1.60759	0.333839	0.515179	-0.465548	0.651749	0.702709	0
USP5	1.0675	0.334083	0.515256	-10.0599	1.59846e-06	1.69568e-05	0
CDK5RAP3	-1.01095	0.334234	0.515256	3.82224	0.00323408	0.0067707	0
SRSF6	-1.02392	0.334467	0.515349	1.54222	0.154045	0.199172	0
COX5A	-1.04347	0.334879	0.515718	-10.8658	2.05335e-06	2.02849e-05	0
KHSRP	-1.01585	0.335414	0.516046	-10.0284	6.41202e-06	4.70302e-05	0
CBR1	-1.04683	0.335438	0.516046	-9.69304	2.35951e-05	0.000125528	0
CD63	-1.00273	0.335842	0.5164	0.366089	0.725181	0.767742	0
DNAJC10	-1.02052	0.336542	0.51721	-1.67132	0.12243	0.162995	0
NT5C3A	-1.08636	0.336945	0.517363	0.239869	0.816106	0.846359	0
NUP88	-1.10611	0.336989	0.517363	-12.0557	9.05045e-07	1.1331e-05	0
AP2S1	-1.00902	0.337208	0.517434	-10.1897	3.21178e-05	0.000157904	0
NOTCH1	-1.02083	0.338097	0.518532	2.38823	0.0355141	0.0546654	0
SRPK1	-1.06463	0.338456	0.518814	-9.93771	1.04408e-06	1.25515e-05	0
ARHGDIA	-1.01098	0.339036	0.519438	-8.49156	3.90384e-05	0.000183714	0
GDI2	-0.992009	0.340864	0.521732	-3.62398	0.00732652	0.0137332	0
APPL1	1.01412	0.340883	0.521732	1.8714	0.092848	0.127699	0
TM9SF4	-0.990087	0.342013	0.523192	1.15363	0.287979	0.345165	0
KTN1	1.02133	0.342347	0.523435	0.787382	0.446726	0.507488	0
CLCN7	-1.46094	0.343111	0.524335	-1.5249	0.16114	0.207328	0
ALDH1A2	1.01532	0.344562	0.526031	5.21088	0.00024019	0.000765616	0
CDKAL1	-1.01159	0.344574	0.526031	0.364507	0.724114	0.766869	0
ACTN4	0.986638	0.345109	0.52639	0.39881	0.699223	0.744967	0
BAG5	1.08196	0.345162	0.52639	0.505314	0.629185	0.682103	0
NPR2	1.14861	0.345425	0.526521	6.2694	9.05396e-05	0.000350973	0
CAMK2D	0.99553	0.345696	0.526617	7.33648	1.89638e-05	0.000106105	0
AHNAK	-0.981402	0.345841	0.526617	3.99222	0.00203528	0.00456476	0
TRNT1	1.03425	0.347153	0.528346	-2.43555	0.0326711	0.0507589	0
MYDGF	-0.982819	0.34788	0.528912	-8.96086	4.86596e-06	3.7947e-05	0
YWHAH	0.976345	0.348295	0.529273	-3.15987	0.0112533	0.0198684	0
USP10	1.14834	0.348741	0.529509	-4.28018	0.00218018	0.00483562	0
PPIE	1.00199	0.348805	0.529509	-2.85506	0.0241265	0.03875	0
STX4	-0.988855	0.350806	0.53216	2.31327	0.0393304	0.0598332	0
ABCD3	-0.978594	0.350948	0.53216	-5.20334	0.000221964	0.000717286	0
QSOX1	1.00383	0.3511	0.53216	2.6301	0.0220235	0.0357953	0
CRK	-1.16438	0.351265	0.53216	-5.08061	0.00123239	0.00296041	0
IST1	-1.05408	0.351784	0.532676	3.16462	0.0115327	0.0202918	0
SEC13	-0.967886	0.352267	0.533136	-7.86527	4.58013e-06	3.6226e-05	0
RABGAP1	0.976895	0.353618	0.534895	8.60215	1.85643e-06	1.89021e-05	0
CTR9	0.993327	0.353788	0.534895	-7.73501	6.54728e-06	4.78557e-05	0
GNB4	-0.963272	0.354449	0.535501	-2.46162	0.033048	0.0512688	0
ILK	0.969863	0.354547	0.535501	-0.960664	0.363049	0.422994	0
RHOJ	-1.20202	0.355228	0.536086	-0.655356	0.532291	0.592293	0
RHBDD2	1.54906	0.355294	0.536086	5.32235	0.0002634	0.000823819	0
COQ9	1.00622	0.355726	0.536457	-4.66535	0.00177845	0.00405526	0
RUFY3	1.10095	0.3559	0.536457	7.07977	1.5043e-05	8.92205e-05	0
MRPL54	1.02001	0.35621	0.536653	-2.93329	0.017713	0.0296821	0
RAB33B	-0.95866	0.358534	0.539735	-0.391173	0.706329	0.751531	0
MAP7D1	-1.4238	0.358771	0.539735	-6.78127	0.000113874	0.000420913	0
MARCKSL1	0.968203	0.358798	0.539735	-0.961827	0.35598	0.415677	0
DAG1	1.01605	0.359486	0.540497	0.897391	0.387166	0.447588	0
INTS4	1.02283	0.359719	0.540575	-4.12518	0.00207394	0.00463995	0
SLC25A20	-0.997642	0.36056	0.54145	-6.47565	4.37197e-05	0.000200739	0
ACADM	0.959636	0.360664	0.54145	-2.39089	0.0358112	0.055069	0
TUBA4A	0.954965	0.360893	0.541521	-3.24747	0.00723844	0.0135807	0
ILVBL	-0.961863	0.361134	0.54161	-1.31486	0.214451	0.267218	0
UBR5	1.0837	0.363886	0.54519	0.221223	0.828758	0.85674	0
PPP1CB	0.965712	0.366443	0.548694	4.73214	0.000876108	0.0022304	0
NDUFS2	-0.938227	0.366634	0.548694	-8.53358	3.91302e-06	3.22766e-05	0
TJP1	0.952217	0.366777	0.548694	1.25129	0.234674	0.288971	0
ARPC4	0.948359	0.367887	0.550078	-5.53576	0.000624086	0.00169093	0
GYS1	-1.01257	0.368302	0.550423	-15.6348	2.87737e-09	2.86491e-07	0
FAM234A	1.4147	0.369381	0.551484	5.02385	0.000868405	0.00221659	0
PRKAR2B	-0.946861	0.36992	0.552012	-5.11962	0.00174952	0.00399616	0
SLC16A3	-1.10919	0.370249	0.552226	-1.88483	0.0910205	0.125363	0
COPS3	0.969503	0.370493	0.552315	-10.1559	2.03782e-06	2.01788e-05	0
PMPCB	-0.967767	0.371109	0.552955	1.65747	0.140746	0.184216	0
LMAN2	-0.926971	0.372493	0.554742	-1.30452	0.224933	0.278523	0
MUT	-0.92457	0.37432	0.556713	1.60988	0.135312	0.177953	0
TACO1	0.958796	0.374417	0.556713	-9.3122	2.13161e-05	0.000116534	0
DDRGK1	0.932932	0.374616	0.556713	0.0371794	0.970975	0.97638	0
ATL3	-0.941569	0.374655	0.556713	4.26122	0.00134305	0.00318091	0
UBA1	-0.922977	0.37475	0.556713	-9.93749	2.70726e-05	0.000139557	0
NUCB1	0.927548	0.375914	0.558163	13.6244	1.04778e-07	2.65515e-06	0
HDHD5	0.935647	0.37787	0.560232	-2.51849	0.0316338	0.0493609	0
QRICH1	0.937125	0.378812	0.561349	-4.9413	0.00185093	0.00419745	0
JUP	-0.975829	0.379821	0.562565	-2.25027	0.0546581	0.0801335	0
UBE2N	0.922799	0.380413	0.563162	-14.3321	7.55613e-09	4.92512e-07	0
SULF1	0.968448	0.38164	0.564698	8.34202	4.69286e-05	0.00021216	0
IGF1R	1.03966	0.382439	0.56532	11.3488	3.44422e-06	2.94271e-05	0
TTC37	0.957469	0.384336	0.567842	-4.35867	0.000952113	0.00238831	0
EPB41L4A	-0.969805	0.385543	0.569229	9.72006	1.85127e-06	1.88937e-05	0
SUCLG1	0.900334	0.385656	0.569229	-9.65187	6.13731e-07	8.70025e-06	0
MDH2	0.920169	0.385865	0.569256	-10.7085	6.93055e-07	9.56734e-06	0
PPP2R1A	-0.91254	0.38662	0.570088	-5.2433	0.00123642	0.00296953	0
PLPP3	1.39358	0.387568	0.570921	12.2793	3.7441e-07	6.31301e-06	0
PDIA4	-0.922076	0.387981	0.570966	-3.25682	0.011349	0.0200235	0
SNRPD3	0.918571	0.388311	0.571169	-10.6975	3.75566e-07	6.32362e-06	0
BIRC6	1.23478	0.388619	0.571182	3.56173	0.00436264	0.00876897	0
DOCK7	1.09066	0.388702	0.571182	-8.04287	3.67435e-06	3.08924e-05	0
CDC37	-0.900778	0.389322	0.571693	-2.52553	0.035969	0.0552713	0
GSR	0.909633	0.389434	0.571693	-10.4891	7.70564e-07	1.02916e-05	0
LIPA	0.959265	0.390051	0.572319	5.33796	0.000232233	0.000744004	0
BIN3	1.16827	0.390349	0.572329	1.44258	0.18609	0.235334	0
SMARCD2	0.96852	0.390442	0.572329	-5.01456	0.00103622	0.00256144	0
IMPAD1	-0.89607	0.390735	0.572477	5.53216	0.000576577	0.00157953	0
TMOD3	0.889197	0.391874	0.573864	2.37028	0.0366865	0.056244	0
ESYT2	-0.895856	0.392242	0.57412	5.72221	0.000555071	0.00153251	0
ANAPC7	0.994166	0.392804	0.574517	-5.81359	0.000345819	0.00103549	0
NEK7	1.28097	0.392915	0.574517	0.286421	0.781164	0.815904	0
CYP20A1	-0.917104	0.39309	0.574517	1.83086	0.0960939	0.131733	0
ATP2B1	0.966417	0.394858	0.576535	5.48069	0.000436954	0.0012512	0
CRKL	0.918326	0.395658	0.577421	-3.97945	0.00515546	0.0101477	0
MRPL2	-1.20488	0.395862	0.577436	-6.20529	0.000217698	0.000706931	0
KRI1	0.906273	0.396107	0.57749	-2.51335	0.0335862	0.0520017	0
IGFBP2	1.04393	0.396286	0.57749	1.341	0.209242	0.261423	0
CTSS	0.967007	0.396853	0.578033	3.33771	0.00841284	0.0154848	0
GMDS	1.00509	0.397241	0.578316	6.6085	3.116e-05	0.000154721	0
HTATIP2	-0.883369	0.399678	0.58158	-4.09652	0.00161117	0.00372454	0
COG7	1.23076	0.400201	0.58178	3.43825	0.00857781	0.0157355	0
GPX4	-0.902824	0.400205	0.58178	-6.85975	1.76274e-05	0.00010012	0
COPS6	0.874731	0.401736	0.583673	-10.0115	1.16576e-06	1.35737e-05	0
DGUOK	0.942099	0.401899	0.583673	-4.79809	0.000815033	0.00210672	0
TRIM2	1.35447	0.402635	0.584276	2.58854	0.024079	0.0386788	0
FIP1L1	1.19995	0.402706	0.584276	-0.709474	0.491902	0.552358	0
RAB11FIP1	0.934692	0.403171	0.584666	11.5491	5.26583e-06	4.03065e-05	0
PSMB5	-0.901901	0.404519	0.586336	-8.11987	1.65312e-05	9.53638e-05	0
PKM	-0.87091	0.404762	0.586403	-9.8064	1.10859e-05	7.06561e-05	0
GLYR1	0.968492	0.405787	0.587603	-4.43652	0.00243541	0.00530961	0
SCARB2	-0.873836	0.406123	0.587647	2.84565	0.0147468	0.0252127	0
WARS	-0.861244	0.406211	0.587647	2.97088	0.0153664	0.0261836	0
TUBGCP3	0.951784	0.408954	0.591084	-2.14134	0.0546036	0.0800815	0
ARPC1B	0.883791	0.409177	0.591084	-1.98782	0.0720146	0.101882	0
SMARCD1	1.00177	0.409181	0.591084	-8.50279	3.83567e-05	0.00018115	0
CD46	-0.882789	0.410265	0.592108	2.63901	0.0226242	0.036621	0
AK2	0.853561	0.410287	0.592108	-5.37842	0.00112745	0.00275064	0
PTGES3	-0.873864	0.411513	0.59359	-5.31183	0.000284944	0.000878382	0
STAU2	-0.966129	0.413729	0.596075	2.74913	0.0176527	0.0295927	0
PALLD	0.860256	0.414006	0.596075	9.4495	5.92104e-06	4.41981e-05	0
ENO2	0.846478	0.414035	0.596075	-0.961435	0.356743	0.416451	0
PPM1A	1.01065	0.414523	0.596292	3.13902	0.0173556	0.0291411	0
CPPED1	1.23532	0.414586	0.596292	-0.954085	0.361064	0.420992	0
NFASC	1.25367	0.415378	0.597074	5.79255	0.000354004	0.00105425	0
CCT2	-0.845142	0.41553	0.597074	-9.47451	2.46564e-05	0.000129854	0
DYNC1LI2	-0.8428	0.415848	0.597168	-0.899711	0.394669	0.454779	0
UNG	0.857684	0.416171	0.597168	-8.34579	5.79282e-06	4.34978e-05	0
UGDH	-0.913945	0.416196	0.597168	-5.59493	0.000206231	0.000675595	0
MLEC	-0.847553	0.416446	0.59724	-7.53668	9.82775e-05	0.000374765	0
ARPC5L	0.874185	0.417501	0.598431	-4.0104	0.00204002	0.00457215	0
PRPS1	-0.869948	0.417678	0.598431	-6.74309	4.14557e-05	0.000192299	0
PDHX	0.848071	0.418773	0.599359	-3.66422	0.00412558	0.00835489	0
C6orf120	-1.29217	0.418914	0.599359	-2.98831	0.011791	0.020685	0
RAD23B	0.84332	0.418928	0.599359	-12.6822	3.35788e-07	5.88909e-06	0
HSPA8	-0.841797	0.420444	0.601239	-7.18853	0.000125465	0.000454196	0
AUP1	-0.843872	0.4211	0.601889	-3.83299	0.0057077	0.0110747	0
EWSR1	-0.84507	0.421594	0.602306	-5.14184	0.0012159	0.00292747	0
TOMM70	-0.83224	0.423161	0.604221	-3.68709	0.00443295	0.00889615	0
CLSTN1	0.883439	0.42334	0.604221	1.71775	0.113232	0.152062	0
TMCC3	-0.85826	0.423608	0.604281	3.86033	0.00236585	0.00518119	0
DAZAP1	0.855437	0.423787	0.604281	-8.36688	3.88949e-05	0.000183176	0
STX7	0.832045	0.424096	0.604429	8.0746	3.49207e-06	2.97389e-05	0
TIMM44	-0.844614	0.424296	0.604429	-6.71304	2.38118e-05	0.00012646	0
SYNE1	-0.842643	0.42492	0.604619	5.00733	0.00172907	0.00395768	0
MAPRE3	0.873081	0.425152	0.604619	1.54646	0.147972	0.192382	0
TOM1L2	0.841196	0.425193	0.604619	2.92952	0.012957	0.0225057	0
RABL6	0.831118	0.425323	0.604619	-7.79061	1.30448e-05	7.97637e-05	0
F5	-0.843021	0.425442	0.604619	23.9793	3.77929e-11	2.35754e-08	0
NUDCD1	0.841484	0.425795	0.604643	-5.72848	9.64127e-05	0.00036966	0
PTK2	-0.850762	0.426067	0.604643	-0.0859184	0.932957	0.944913	0
MFSD10	0.827817	0.428024	0.607105	-4.36488	0.00323927	0.00677719	0
RPS17	0.849823	0.428209	0.607105	-4.41393	0.00111527	0.00272513	0
NDRG1	0.824846	0.428878	0.607764	9.88078	4.89409e-07	7.53893e-06	0
MTOR	0.832687	0.429365	0.608163	-5.12202	0.000686715	0.0018232	0
IDH3B	-0.820318	0.429568	0.608163	-4.92236	0.000545831	0.00151062	0
NDUFB6	0.862708	0.430056	0.608566	-3.99041	0.00193889	0.00436715	0
DNAJA2	-0.823198	0.432229	0.611351	-2.16063	0.065068	0.0931912	0
TRIM27	-0.816818	0.4326	0.611585	-6.34594	0.00039247	0.00114906	0
C12orf57	0.92803	0.433711	0.612362	-1.60481	0.13875	0.18187	0
FUT8	0.88967	0.433972	0.612362	-1.09093	0.297659	0.355487	0
MGST3	-0.833075	0.434106	0.612362	0.345838	0.735455	0.776215	0
CRELD2	-0.855039	0.434386	0.612362	-1.89798	0.0866909	0.120075	0
SMARCA1	-0.843043	0.434586	0.612362	3.91734	0.00216005	0.00479611	0
DNAJB1	0.814179	0.436556	0.614848	0.112317	0.912831	0.927754	0
TKT	-0.808697	0.436879	0.615013	-8.06531	3.36685e-05	0.000163808	0
ATOX1	1.15998	0.437258	0.615255	-6.43559	9.64945e-05	0.000369861	0
FIS1	-0.805367	0.43801	0.61562	0.645097	0.533859	0.593881	0
ATP6V1C1	0.903686	0.438049	0.61562	-8.41658	3.32683e-06	2.8676e-05	0
TOP2B	-0.846518	0.438137	0.61562	-2.67954	0.0243719	0.0390896	0
HNRNPUL1	-0.822579	0.438818	0.616288	-17.7031	1.40864e-07	3.3294e-06	0
CLTB	0.797506	0.441156	0.618675	-3.3289	0.00672544	0.012752	0
PPIF	0.858779	0.441194	0.618675	-7.17212	0.000267264	0.000833077	0
[truncated: 807 more rows]
