# Supplementary figures and images for: Transcriptional drifts associated with environmental changes in endothelial cells
Source: eLife journal article supplement (doi:10.7554/elife.81370), 2023-03-27

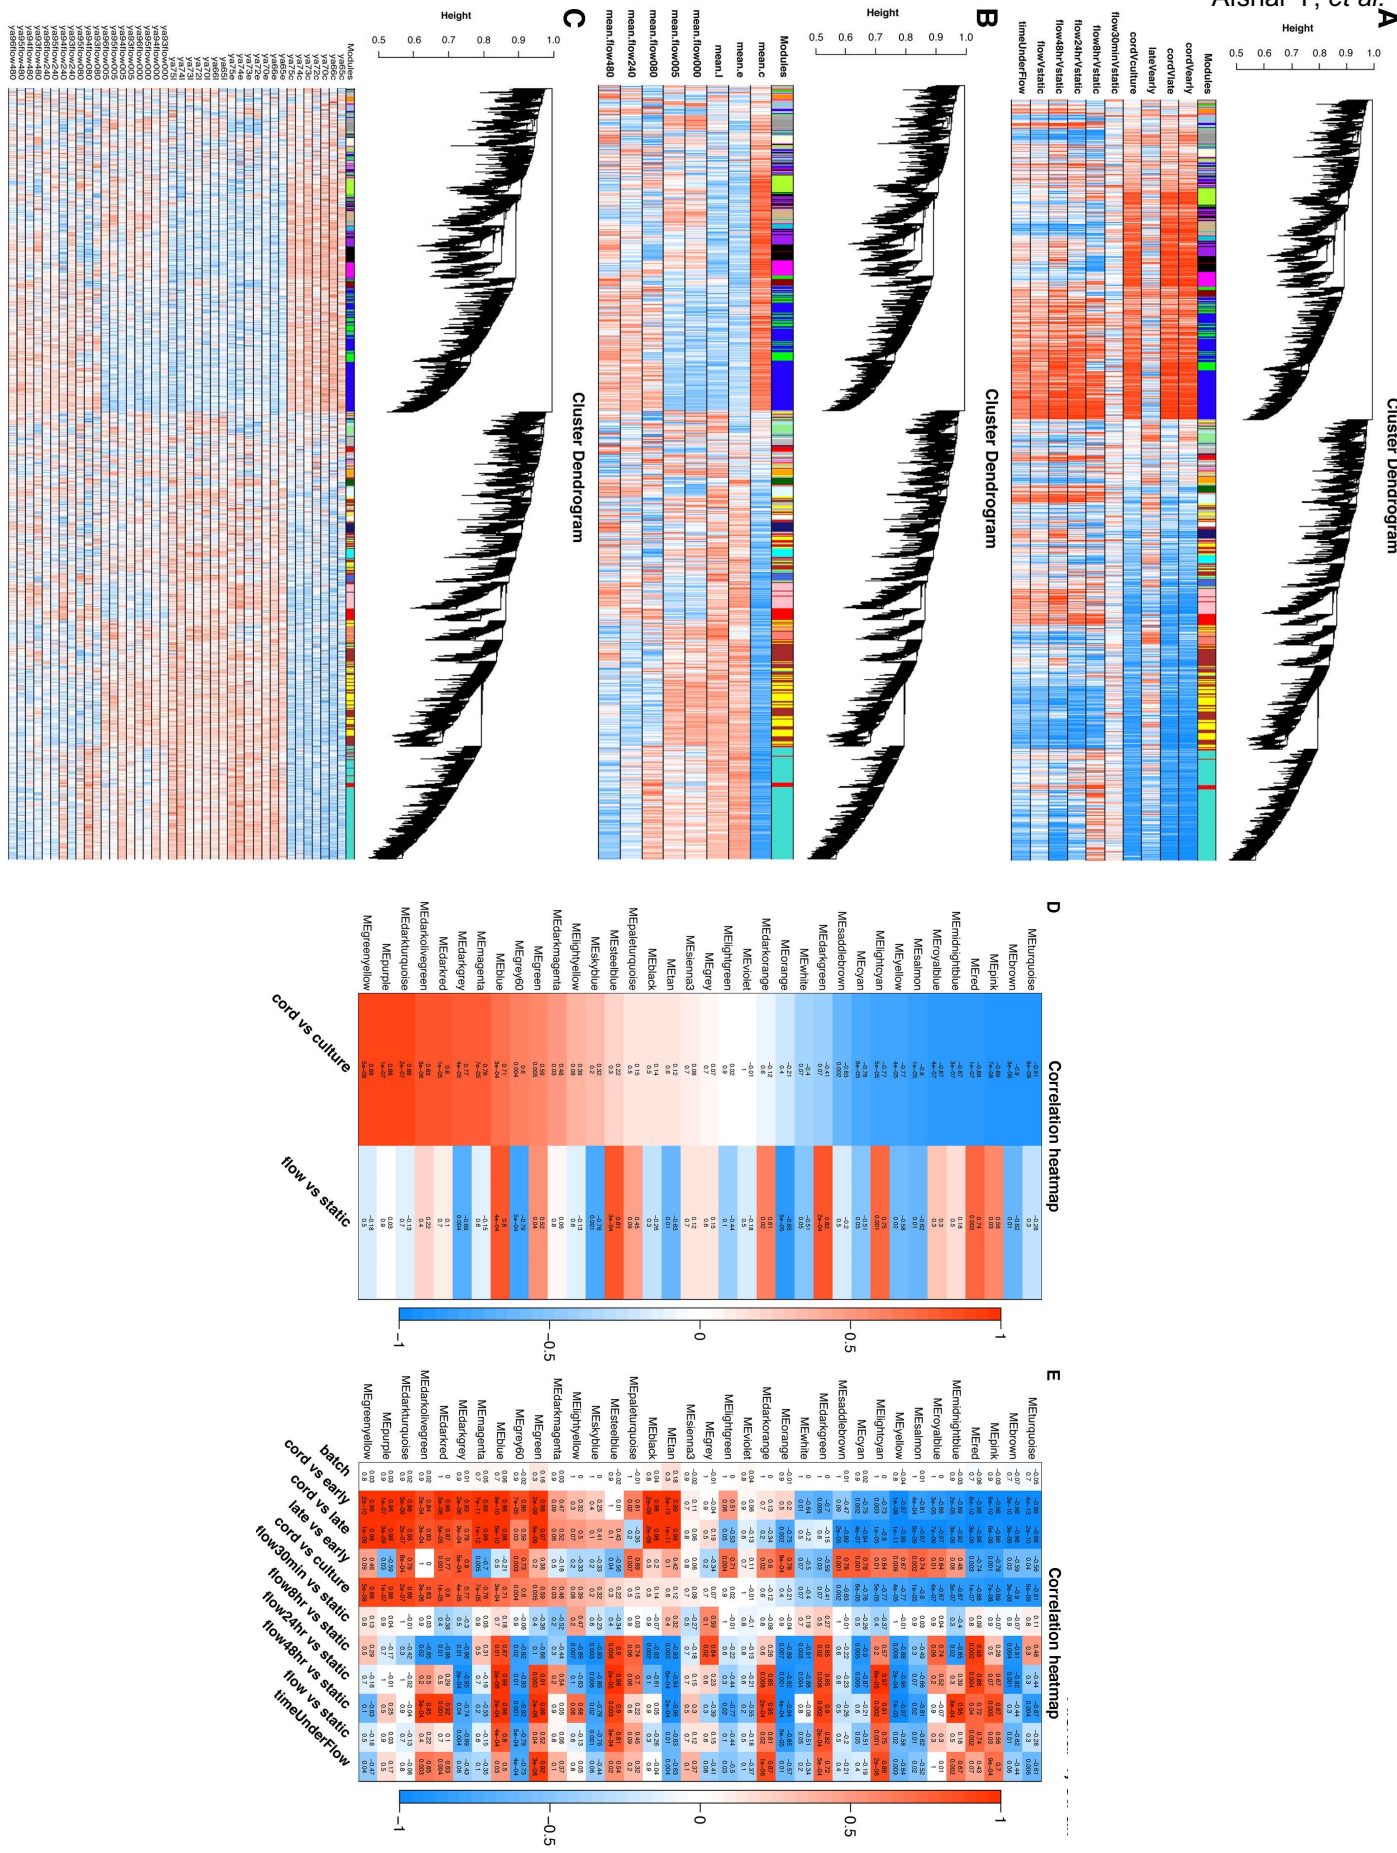

Supplement: supp [file elife-81370-supp-v1.zip]

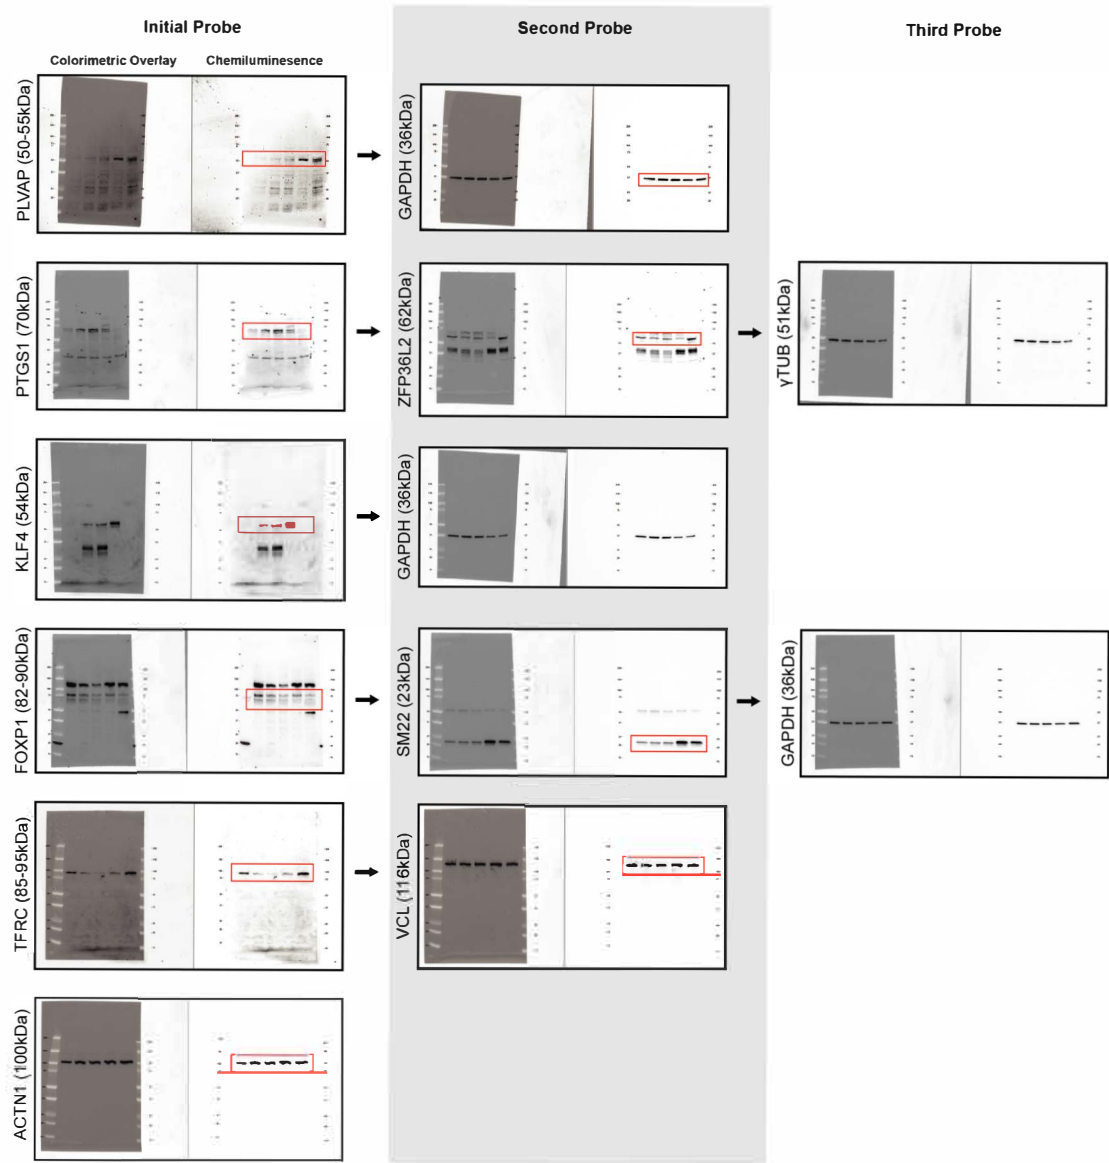

Supplement: supp [file elife-81370-supp-v1.zip]

Figure 2-figure supplement 1  
Afshar Y, et al

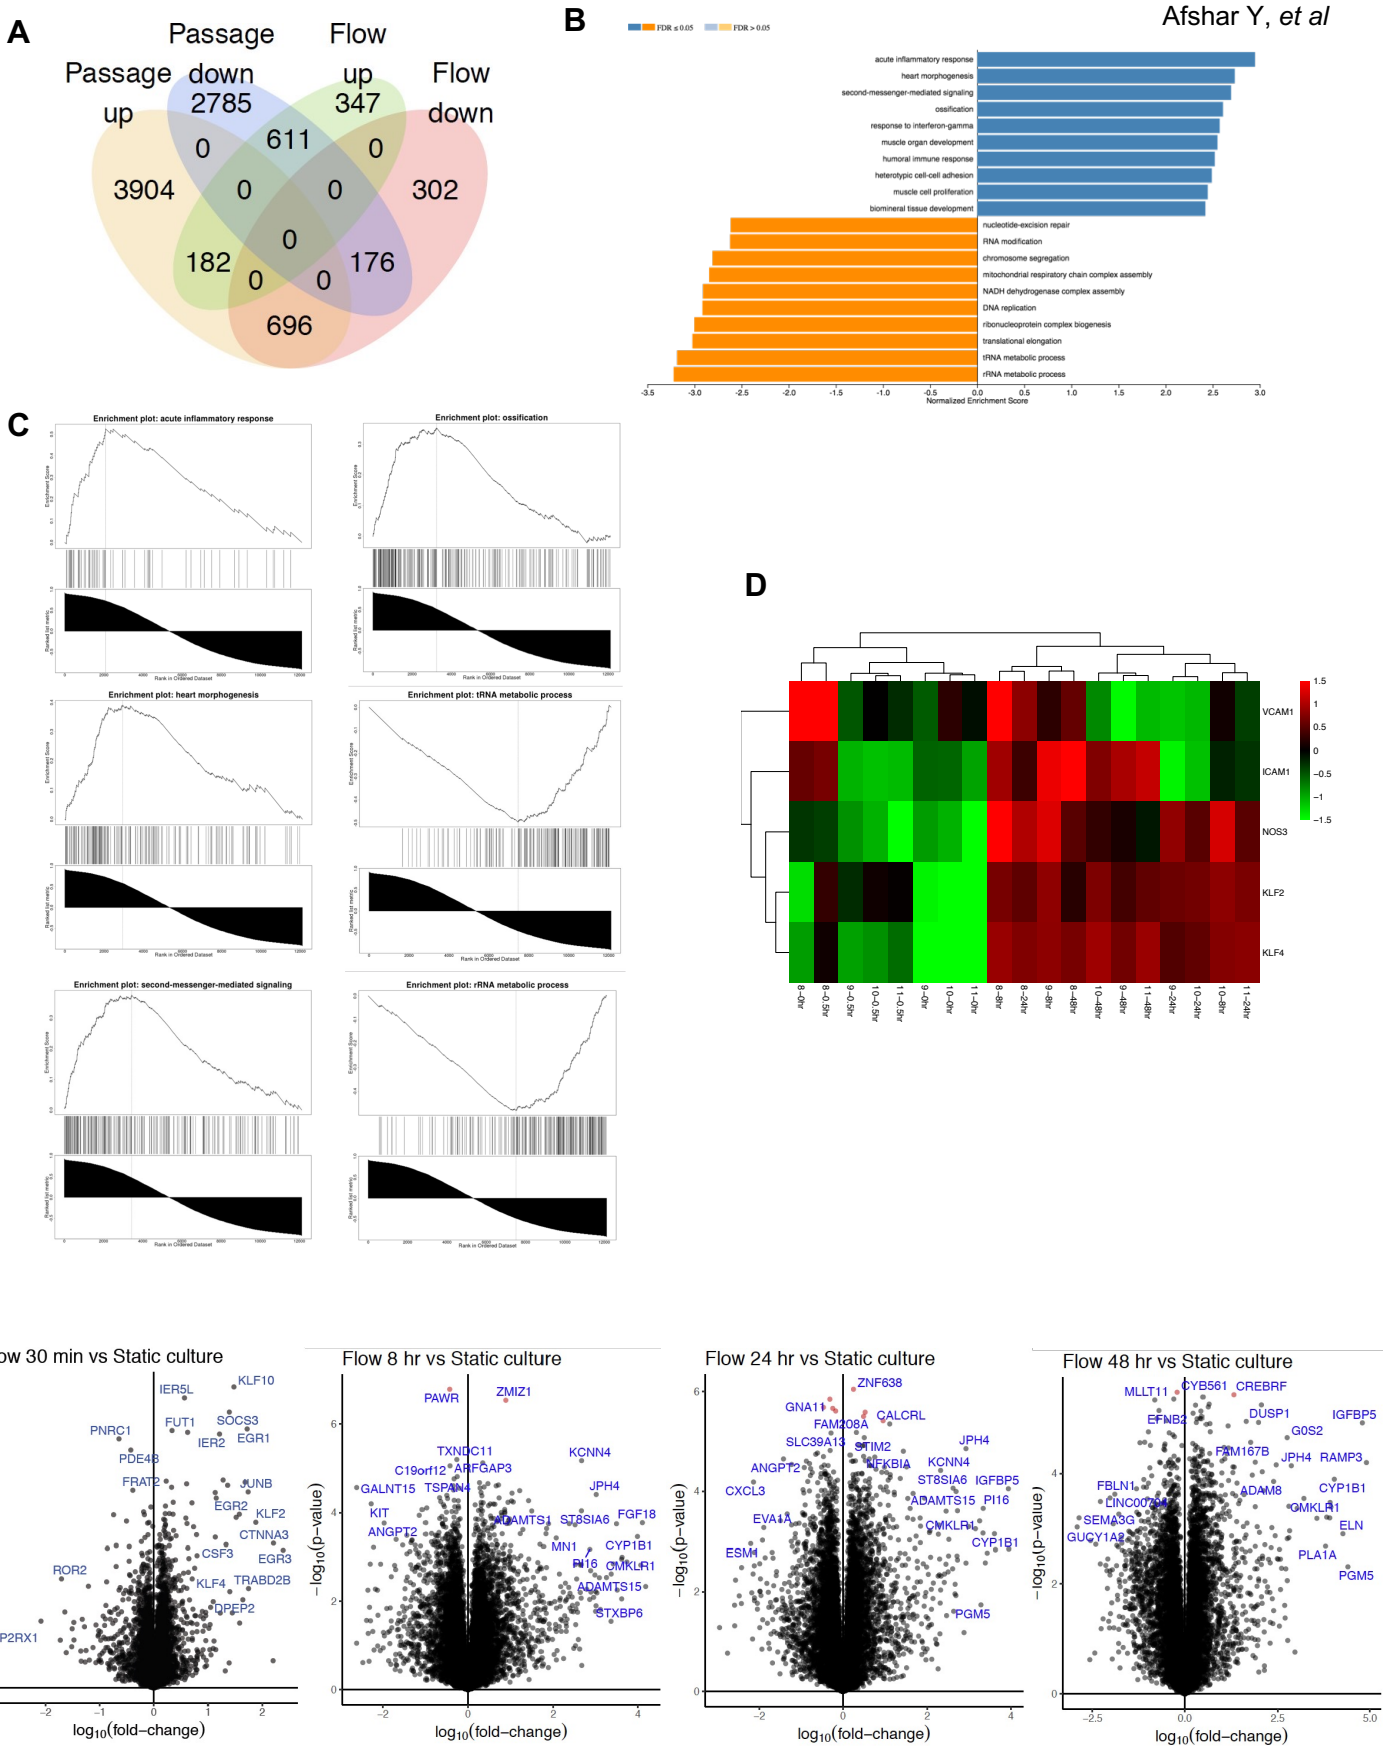

Supplement: supp [file elife-81370-supp-v1.zip]

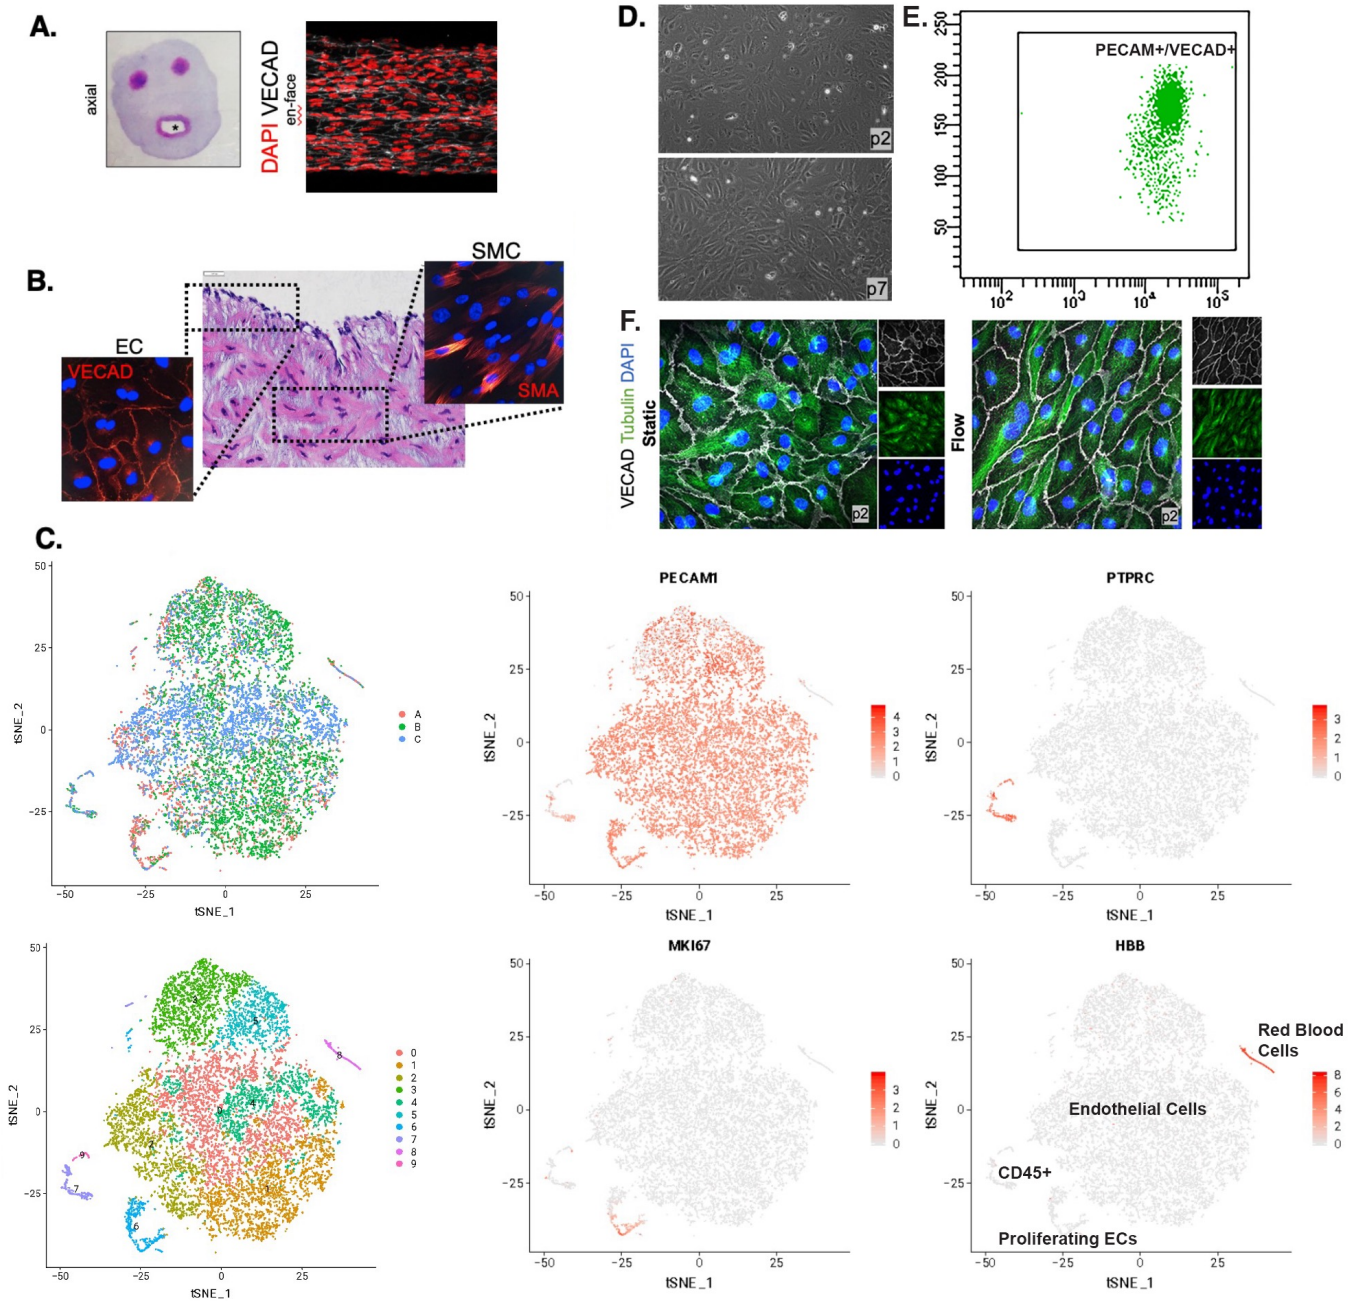

Supplement: supp [file elife-81370-supp-v1.zip]

Figure 1-figure supplement 2  
Afshar Y, *et al*

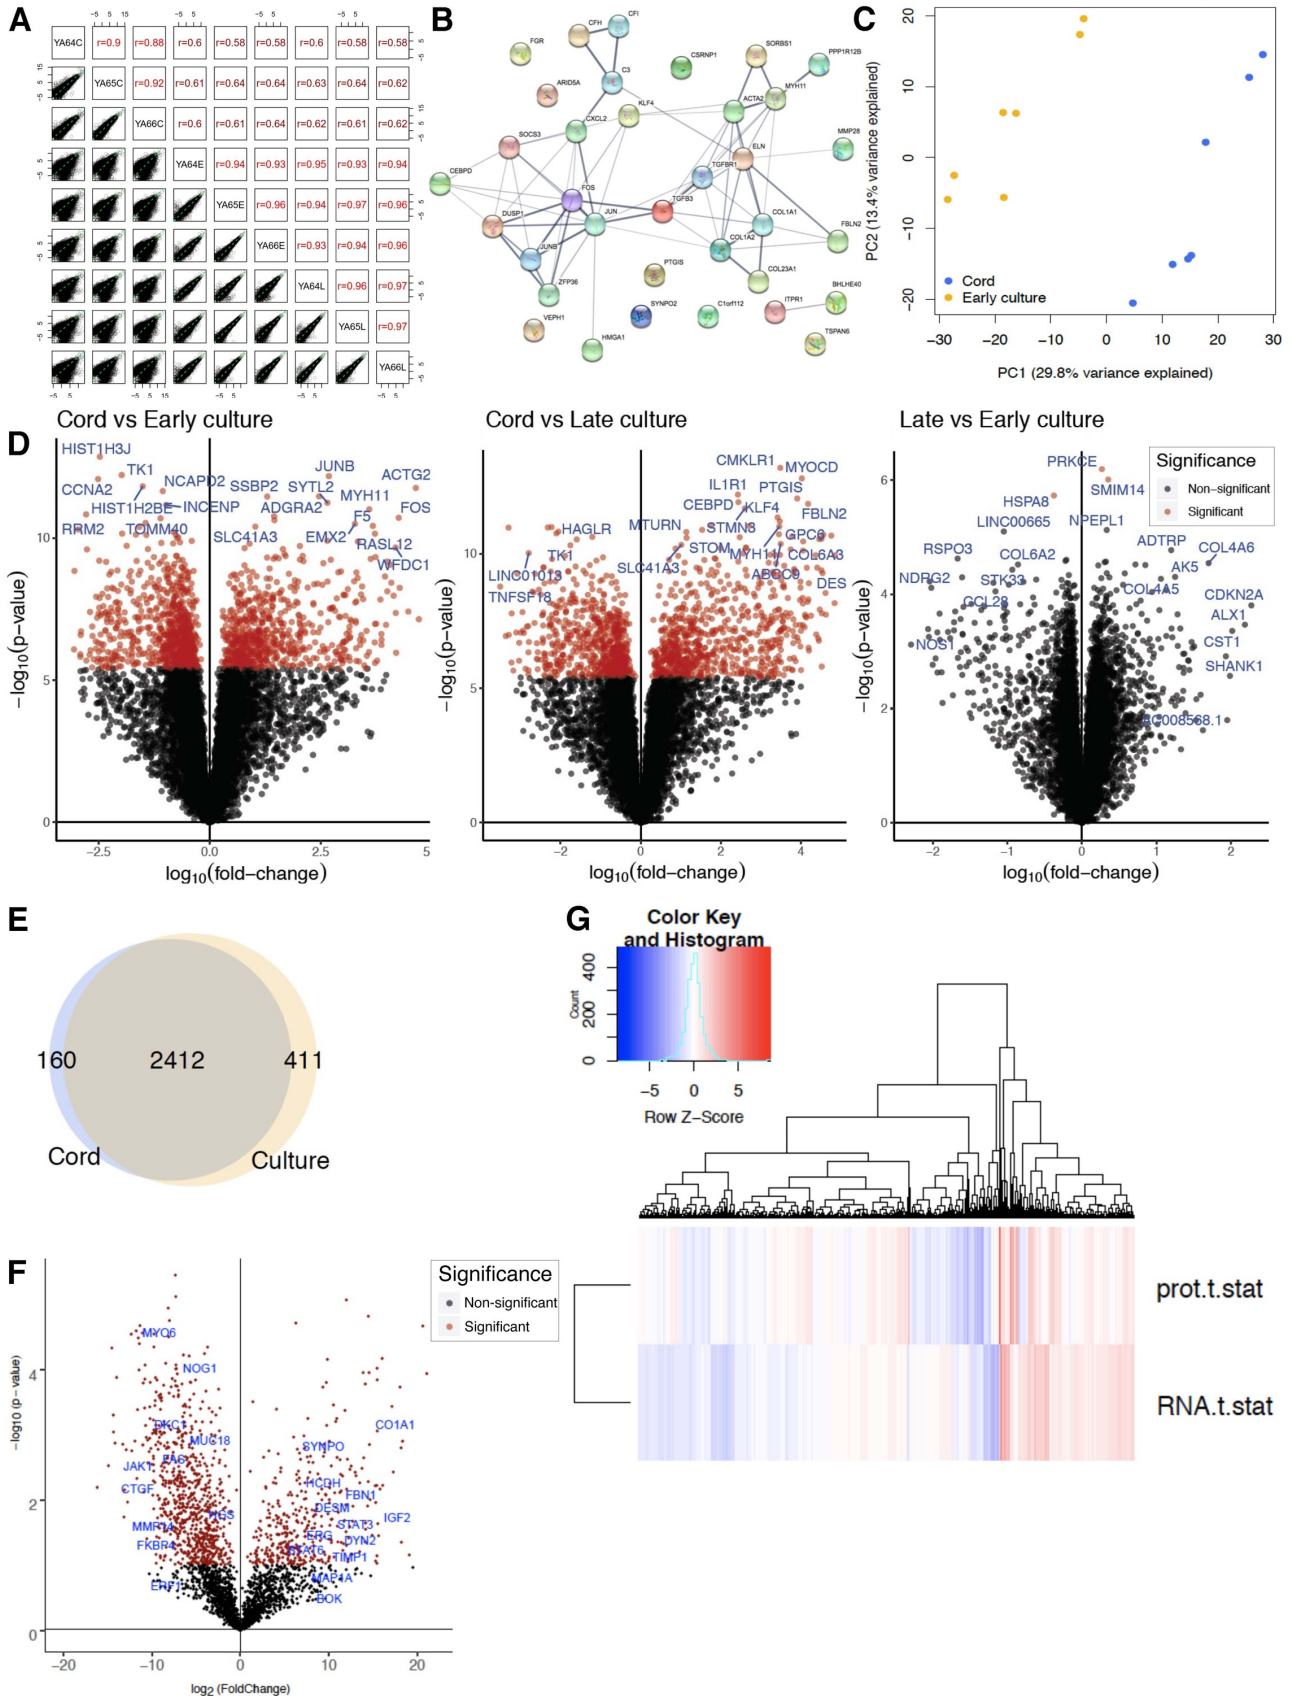

Supplement: supp [file elife-81370-supp-v1.zip]

Figure 5-figure supplement 1  
Afshar Y, et al

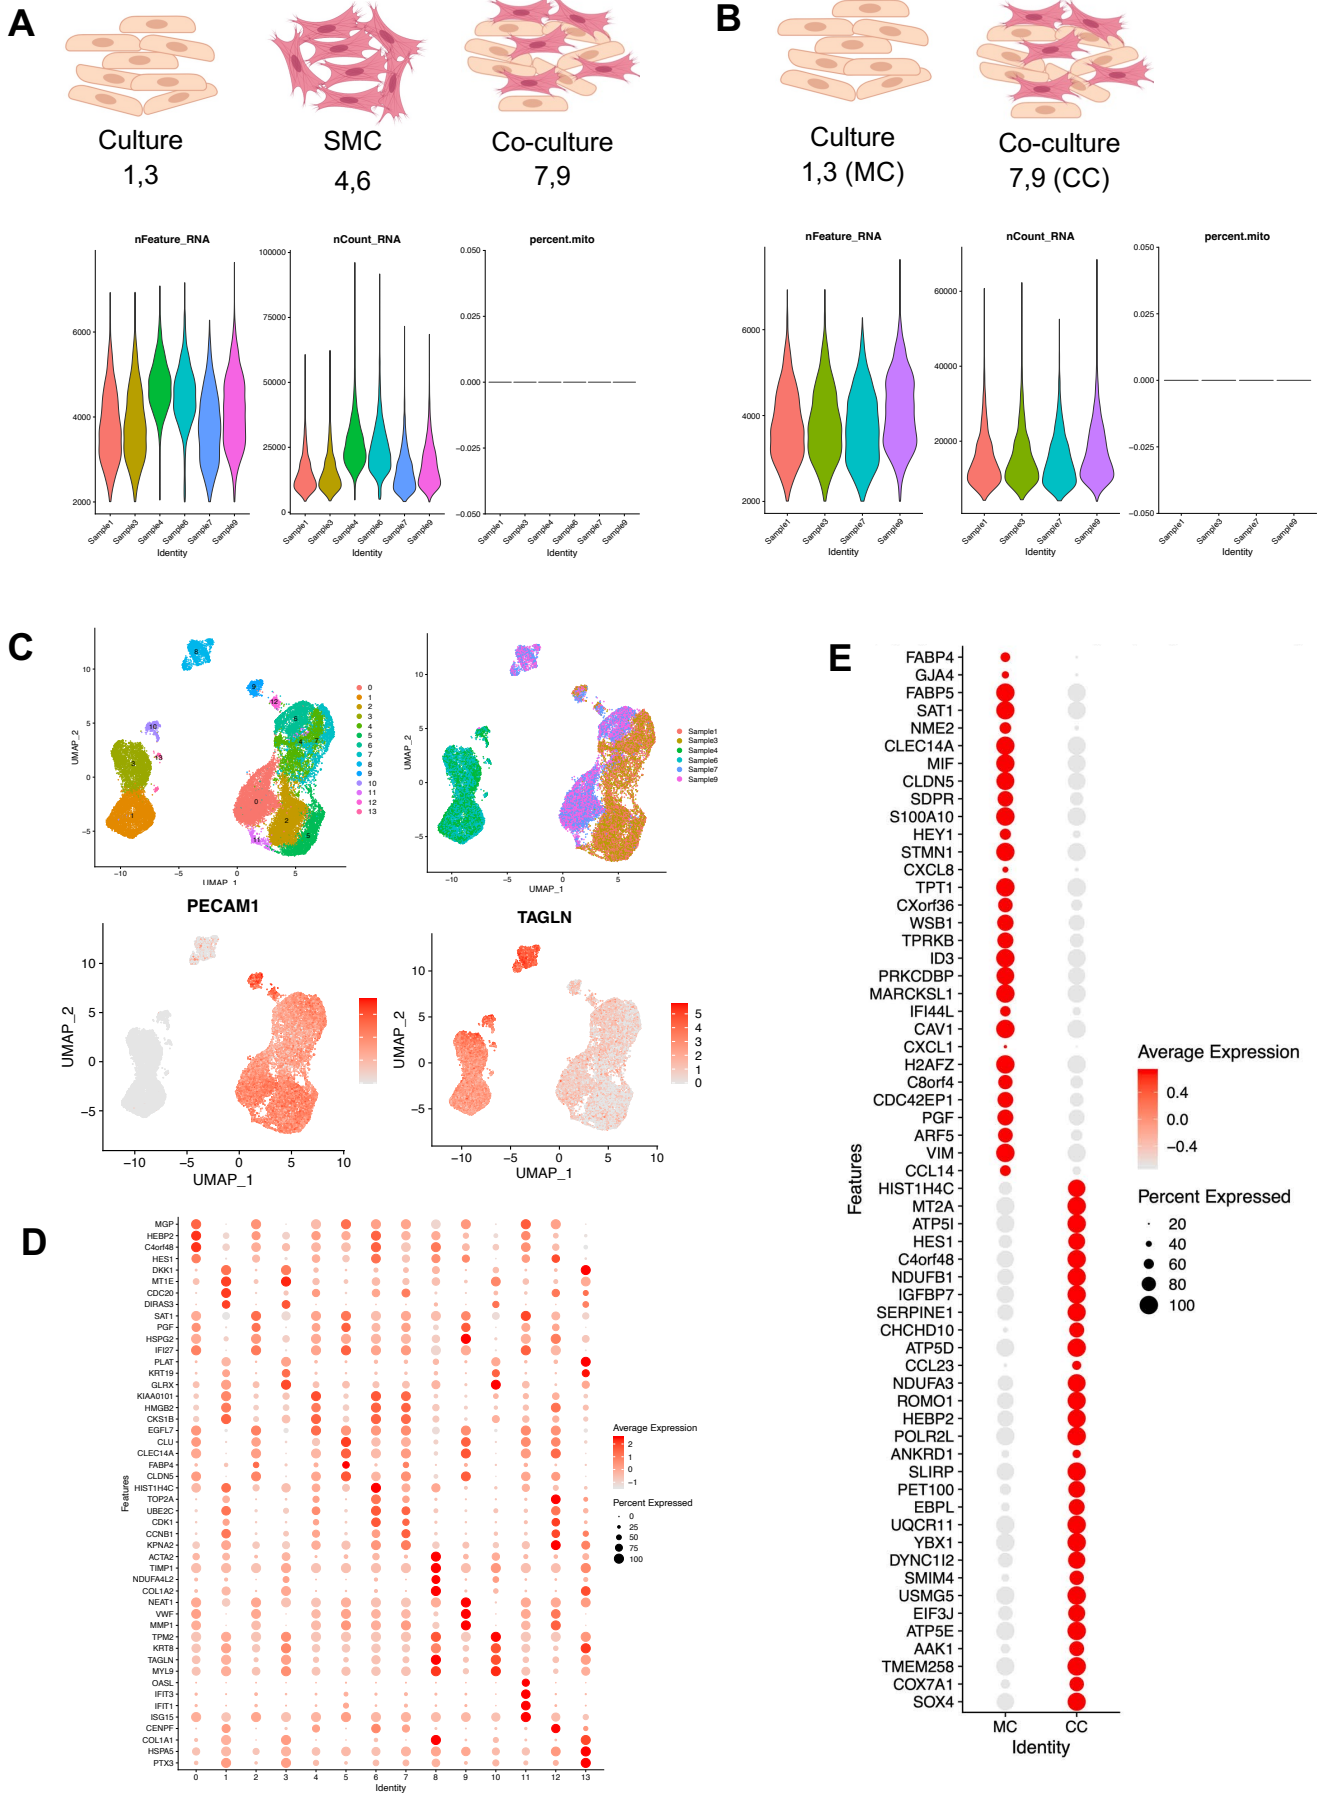

Supplement: supp [file elife-81370-supp-v1.zip]
